# Supplementary material for: Exploring prompting for dialectical machine translation: a focus on north Jordanian Arabic
Source: PeerJ journal article supplement (doi:10.7717/peerj-cs.3209), 2025-11-12
Supplement: Code.zip [file AraT5_base_1024_prediction.xlsx]

## Sheet: Sheet1
MSA	IrbidDial	T5
ما رأيك في مشاهدة فيلم آخر ؟	شو رأيك نشوف فيلم ثاني؟	ما رأيك في مشاهدة فيلم آخر ؟
أريد كوبا من الماء لأتناول بعض الدواء , من فضلك .	بدي كاسة مي عشان اوخذ الدوا، لو سمحت.	أريد كوباً من الماء لتناول الدواء ، من فضلك.
أبغي كرة .	بدي طابة.	أريد طابة.
كيف تحب أن يصفف شعرك اليوم ؟	كيف بدك يسرحلك شعرك اليوم؟	كيف تريد أن يسرح شعرك اليوم ؟
أريد رداءا ذات أكمام طويلة .	بدي جاكيت كم طويل.	أريد سترة طويلة.
ها-ها . صباح الخير حان دورك . إنه على ما يرام .	هههه. صباح الخير صار دورك. هو كويس.	نعم. صباح الخير كان دورك. إنه جيد.
أين نتقابل ؟	وين بدنا نتلاقى؟	أين نلتقي ؟
لقد أثلج صدري زيارة مقاركم الرئيسية وكذا ما جرى بيننا من مناقشات مهمة . شكراً جزيلاً على ما أبديتموه من تعاون .	فرحت كتير لما زرت مكاتبكم الرئيسية وكمان النقاشات الهمة اللي صارت بيناتنا. كتير شكراً على العون اللي قدمتوه.	لقد سعدت حقاً بزيارة مكاتبكم الرئيسية وكذلك النقاشات الجادة التي جرت بيننا. شكراً جزيلاً على العون الذي قدمتموه لنا.
هل هذا قطار مباشر ؟	هاذ القطار مباشر؟	هل هذا القطار مباشر ؟
إبريق من القهوة ، لطفاً .	بكرج قهوة، لو سمحت.	في جعة ، من فضلك.
كم تكلفة الإفطار ؟	بقديش الفطور ؟	بكم الإفطار ؟
من فضلك اختر لي مائدة ذات منظر ليلي لطيف .	من فظلك إختارلي طاولة مع منظر حلو بالليل.	من فضلك اختر منضدة ذات منظر جميل ليلا.
أين الحلاق ؟	وين الحلاق؟	أين الحلاق ؟
الشاطئ أسفل يمينا . ياله من منظر رائع .	الشط تحت على اليمين. شو المنظر بجنن.	الشاطئ أسفل على اليمين. إنه منظر رائع.
كلاً ، إنهم متينين جداً .	لا، هظول كثير قويات.	لا ، هؤلاء أقوياء جداً.
اتجه يسارا عند الناصية الثالثة .	روح يسار من عند الدخلة الثالثة .	اتجه يساراً عند المدخل الثالث.
أين المحطة النهائية للحافلة ؟	وين اخر موقف للباص؟	أين آخر موقف للأتوبيس ؟
كم يتقاضى المرشد في اليوم ؟	قديش بيوخذ الدليل باليوم؟	كم يتقاضى الدليل في اليوم ؟
أريد كيساً من الفشار ، من فضلك .	بدي كيس بوشار، لو سمحت.	أريد كيس من البشار ، من فضلك.
من فضلك غير خمسين آلاف ين إلى دولارات أمريكية .	لو سمحت اصرف الخمسين ألف ين لدولر أمريكي.	من فضلك اصرف خمسين ألف ين إلى دولار أمريكي.
أريد قاموس جيب ، من فضلك .	بدي قاموس بنحط بالجيبة ، لو سمحت.	أريد قاموس يوضع في الحقيبة ، من فضلك.
من فضلك ، أريد فنجاناً من القهوة البيضاء .	لو سمحت ، بدي فنجان قهوة بالحليب.	من فضلك ، أريد فنجان قهوة بالحليب.
هل يمكن أن أحصل على قمصاني نظيفة غداً صباحاً ؟	ممكن ألاقي قمصاني نظيفات بكرا الصبح؟	هل يمكن أن أجد قمصان نظيفة صباح الغد ؟
حسنا , حجرتك يا آنسة هي رقم تسعة صفر ثمانية . هذا مفتاحك .	طيب، غرفتك يا آنسة هي تسعة صفر ثمنية. هاذ مفتاحك.	حسناً ، غرفتك يا آنسة هي تسعة صفر ثمانية. هذا مفتاحك.
نعم ، بالطبع .	أيوا، أكيد.	نعم ، بالتأكيد.
ما تكلفة المقاعد الخاصة بالشرفة ؟	قديش بتكلف الكراسي تبعت البرندة؟	كم تتكلف المقاعد المخصصة للبرندة ؟
هل لي بدليل سياحي ؟	ممكن مرشد سياحي؟	هل لي بمرشد سياحي ؟
أجل ، وأودّ محاسبة المطلوب هاتفياً على قيمة المكالمة .	صح، وأنا بدي احاسب يلي رنيت عليه على حق المكالمة.	نعم ، وأنا سأحاسب الشخص الذي اتصلت به على قيمة المكالمة.
جلد التمساح الأمريكي .	جلد التمساح الأمريكي.	جلد التمساح الأمريكي.
سأكون هنا الساعة الثامنة إلى الربع .	رح أكون هون الساعة ثمانية إلا ربع.	سأكون هنا في الثامنة إلا ربع.
أظن أن الملابس المصنوعة في اليابان قد جرى تفصيلها على نحو أفضل بالتأكيد .	بتوقع انو الأواعي اللي صنعت في اليابان تفصلت بطريقة أحسن أكيد.	أعتقد أن الملابس التي صنعت في اليابان قد فصلت بطريقة أفضل بالتأكيد.
سأكون هناك حوالي السادسة مساءً .	راح أكون هناك حوالي الساعة ستة المسا.	سأكون هناك حوالي الساعة السادسة مساءاً.
لا أجيد الإنجليزية . هل ثمة من يتحدث اليابانية هنا ؟	أنا مش بعرف أحكي إنجليزي. في حدا بحكي ياباني هون؟	أنا لا أجيد التحدث بالإنجليزية. هل يوجد شخص يتحدث اليابانية هنا ؟
إنني أتصل من كشك عمومي في ماسي .	أنا بحكي معك من كشك عام بماسي.	أنا أتحدث إليك من كشك عام في ماسي.
كم الوقت ؟	قديش الساعة؟	كم الساعة ؟
إنني أبحث عن هذا .	أني بدور على هاظ.	أنا أبحث عن هذا.
لماذا لا تعطيها هدية ؟	ليش ما تعطيها هدية؟	لماذا لا تجعلها هدية ؟
استمتعنا بالعشاء .	كيفنا عالعشا.	كيف حال العشاء ؟
سأذهب بك على مقعدك . من هنا ، من فضلك .	راح اوديك على كرسيك. من هون، لو سمحت.	سأصطحبك إلى مقعدك. من هنا ، من فضلك.
سأعود إليك عندما تكون أقل انشغالاً .	راح أرجعلك بس تكون مش مشغول كثير.	سأعود لك عندما تكون غير مشغول جداً.
أنا السيد تكاهاشي بالغرفة رقم خمسة تسعة وأربعين . من فضلك أرسل أربع زجاجات من بيرة بودفايزر .	أنا الأستاذ تكاهاشي بالأوضة رقم ٥٩ . لو سمحت بدي أربع بطولين من البيرة بودفايزر.	أنا السيد تكاهاشي في الغرفة رقم ٥٩. من فضلك أريد أربعة بطولين من البيرة بودفايزر.
حسنا ، إنه وقت الغداء . هل تحب أن نناقشه على الغداء ؟	ماشي، وقت الاكل صار. بتحب نحكي عنها واحنا ناكل؟	حسنا ، وقت الطعام قد انتهى. هل تحب أن نتحدث عنها أثناء الوجبات ؟
هناك الكثير من الينابيع الحارة .	في كثير ينابيع حارة.	يوجد كثير من الينابيع الحارة.
سر مباشرة ، من فضلك .	روح ع طول، لو سمحت.	اذهب فوراً ، من فضلك.
هل تمانع إذا التقطت صورة لك ولسيارتك الأجرة ؟	بتمانع لو أخذت صورة إلك وللتكسي تبعتك؟	هل تمانع في التقاط صورة لك ولتكسي الأجرة الخاص بك ؟
كم من الوقت نحتاج للذهاب مشياً من هنا إلى مبنى البلدية ؟	قديش بدنا وقت عشان نمشي من هون لبناية البلدية؟	كم من الوقت يستغرق الذهاب من هنا إلى مبنى البلدية ؟
هل تستطيع أن تخفض سعرها لوجود بعض البقع بها ؟	بتقدر ترخصها لأنه في عليها شوية بقع؟	هل يمكنك أن ترخصها لأن عليها بعض البقع ؟
شكراً ، هذا يكفي .	شكراً ، هاظ بكفي.	شكراً ، هذا يكفي.
أريد الشخص الذي يعد وثائق عادية في حجم ورقة الخطاب بدون الحاجة إلى طيهم .	بدي الشخص اللي بعمل الوثائق اللي بحجم الورق العادي بدون ما يظطر يثنيهم.	أريد الشخص الذي يقوم بعمل الوثائق ذات الحجم العادي دون أن يضطر إلى أن يثنيهم.
هل نحتاج إلى طرح هذا للتصويت ؟ إن لم نكن في حاجة إلى هذا ، فإمكاني أن أعتقد حينئذ أننا قد وصلنا إلى نتيجة , سأقوم بإرسالها إلى مجلس إدارتنا صباح غد .	هل احنا محتاجين نحط هاظ للتصويت؟ اذا لأ، بتوقع أنه وصلنا للنتيجة، بدي أبعثها لمجلس ادارتنا بكرا الصبح.	هل نحن بحاجة إلى التصويت ؟ إذا لا ، أعتقد أننا وصلنا إلى النتيجة ، سأرسلها إلى مجلس إدارتنا صباح الغد.
أين مترو الأنفاق ؟	وين المترو؟	أين محطة مترو الأنفاق ؟
كنت أفكر في الحصول على هذه الدورة في فترة نصف العام المقبلة .	كنت بفكر أوخذ هالكورس بفترة نص السنة الجاية.	كنت أفكر في الحصول على هذا الكورس في النصف الأول من العام القادم.
الخامس عشر من سبتمبر يوم احترام المسنين .	خمسطعش تسعة هو يوم احترام المسنين.	خمسة عشر تسعة هو يوم احترام المسنين.
ارفعوا أيديكم .	ارفعوا إيديكو	ارفعوا أيديكم.
أين موقف الحافلات ل بي ؟	وين مجمع الباصات ل بي ؟	أين محطة الحافلات ل بي ؟
قم بدفعها من فضلك , إن كان ذلك ممكنا .	لو سمحت دزها , إذا بصير	من فضلك دزها ، إذا أمكن.
لقد نسيت أن آخذ حقيبتي اليدوية .	نسيت آخذ شنتة الإيد.	لقد نسيت حقيبة يدي.
فكرة صائبة . متى تخطط للمجيء ؟	فكرة صحيحة. متى بتنوي تيجي؟	فكرة صحيحة. متى تنوي الحضور ؟
اثنان ويسكي مع الماء , من فضلك .	تنين ويسكي مع مية, لو سمحت.	تنين ويسكي مع مية, من فضلك.
على فكرة , هل أنت غير مشغول السبت القادم ؟	بالمناسبة، راح تكون فاضي السبت الجاي؟	بالمناسبة ، هل ستكون مستعداً السبت القادم ؟
هل لديك هذا باللون الأخضر الداكن ؟	عندك هاذ باللون الاخضر الغامق؟	هل لديك هذا باللون الأخضر الغامق ؟
هالو ، هل هذه تعود إلى روي ؟	مرحبا، هاي لروي؟	مرحباً. هل هذه لروي ؟
أريد حامل ثلاثي .	بدي حامل ثلاثي.	أريد حامل ثلاثي.
عظيم . كنت أبحث عن سيارة أجرة لكن هذا أفضل .	كتير حلو. كنت قاعد بدور على تاكسي بس هاي احسن.	جميل. كنت أبحث عن تاكسي ولكن هذه أفضل.
ثلاثة اثنان واحد اثنان . انتظر ثانية ، حسنا ؟ أريد أن أرسل لك شيئاً هنا . معذرة .	ثلاثه اثنين واحد اثنين. استناني شوي , طيب؟ بدي أبعثلك اشي هون. اعذرني.	ثلاثة اثنان واحد اثنان. انتظر لحظة ، حسناً ؟ أود أن أرسل لك شيئاً هنا. شكراً.
حسنا ، إنه باهظ الثمن . إنه لم يصنع في اليابان ، أليس كذلك ؟	تمام ، هو غالي .اكيد مش صنع اليابان، مش؟	حسنا ، إنه غالي. بالتأكيد ليس صنع اليابان ، أليس كذلك ؟
ويسكي اسكتلندي وماء من فضلك .	ويسكي اسكتلاندي ومية لو سمحت.	ويسكي اسكتلاندي ومئة من فضلك.
هل توجد أية كازينوهات جيدة ؟	في أي كازينوهات حلوة؟	هل توجد أية كازينوهات جميلة ؟
إنها عاملتني كما لو كنت متسولاُ .	عاملتني كإني شحاد.	لقد تعاملت معي كإنسان شحاد.
شخص ما فتح الطرد الخاص بي .	في حد فتح الطرد تبعي.	هل يوجد أحد ما فتح الطرد الخاص بي.
هل تريد أن افحص موتور السيارة ؟	بدك ياني أفحص ماتور السيارة؟	هل تريدني أن أفحص محرك السيارة ؟
أنا في نزهة طويلة سيرا على الأقدام .	أني طالعة برحلة طويلة تمشاية عجري.	أنا في رحلة طويلة لتمشاية عجري.
هذه الأيام ، استخدم الكمبيوتر بشكل دائم في العمل .	هاي الأيام ، أنا بستخدم الكمبيوتر دايماً بالشغل.	هذه الأيام ، أنا أستخدم الكمبيوتر دائماً في العمل.
موظفو المبيعات في هذا المتجر لطفاء جداً .	موظفين المبيعات بهاذ المحل لطيفين كثير.	موظفين المبيعات في هذا المتجر لطيفون جداً.
الثاني من على اليسار .	الثاني عالشمال .	الثاني على اليسار.
هل أنزل هنا لمركز روكفيلر ؟	أنزل من هون عمركز روكفيلر؟	أنزل من هنا إلى مركز روكفيلر ؟
هذه السيدة كاوازو في غرفة رقم ستة عشر أحدى عشر .	هاي الست كاوازو بالغرفة سطعش إحدعش.	هذه السيدة كاوازو في الغرفة سبعة عشر.
هل تستطيع خفضها حتى عشرين دولار ، من فضلك ؟	بتقدر تنزلها لعشرين دولار، لو سمحت؟	هل يمكنك أن ترفعها إلى عشرين دولاراً ، من فضلك ؟
أشعر بتحسن .	حاس بتحسن.	أشعر بتحسن.
هل يمكنكم صرف الشيك ذو المائتي دولار الخاص بي ؟	بتقدروا تصرفولي الشيك أبو الميتين دولر تاعي؟	هل يمكن أن تصرفوا الشيك ذو المائتين دولار الذي معي ؟
ولكن لا ضرورة لدفع بقشيش .	بس ما في داعي للبخشيش.	ولكن لا داعي للبقشيش.
لقد جاء لتوه .	جا هسا.	جاء الآن.
لنتصل به .	خلينا نرلنه.	دعنا نرهنه.
بالمناسبة ، اسمي هيروش إيجيما .	بالمناسبة، اسمي هيروشي ايجيما.	بالمناسبة ، اسمي هيروشي إيجيما.
التاسع والعشرون من أغسطس .	تسعه وعشرين من آب.	التاسع والعشرون من أغسطس.
هل لا زال لديكم مقاعد لعرض الليلة ؟	ظل في عندكم محلات لعرض الليلة؟	هل مازال لديكم أي محلات لعرض الليلة ؟
أريد القيام بحجز للساعة الثالثة والنصف ظهراُ .	بدي أعمل حجز للساعة ثلاثة ونص الظهر.	أريد أن أقوم بعمل حجز للساعة الثالثة والنصف ظهراً.
سوف نحضرها الآن . ما هو رقم غرفتك ؟	رح نجيبها هلا . شو رقم غرفتك ؟	سنحضرها الآن. ما هو رقم غرفتك ؟
رقم غرفتي هو ثلاثة ستة وعشرين . هل يمكن أن تأخذ الغسيل ؟	رقم غرفتي هو ثلاثة ستة وعشرين. بصير توخذ الغسيل؟	رقم غرفتي هو ثلاثة ستة وعشرين. هل يمكنك أن تأخذ الغسيل ؟
أليس لديك دروس تجريبية ؟	ما عندك كورسات تجريبية؟	هل لديك أية كورسات تجريبية ؟
رحلة الطيران دلتا رقم ثمانية وعشرون والمتجهة إلي نيو أورلينز سوف تتأخر حوالي ساعة .	رحلة الطيارة دلتا رقم ثمانية وعشرين اللي رايحة على نيو أورلينز حتى تتأخر حوالي ساعة.	رحلة الطائرة دلتا رقم ثمانية وعشرين المتجهة إلى نيو أورلينز تستغرق حوالي ساعة.
هل لديكم غرفة متاحة الليلة ؟	عندكم غرفة فاضية الليلة ؟	هل لديكم غرفة متاحة الليلة ؟
بصراحة ، لا أتفق مع ذلك .	بصراحة، ما بتفق مع هاظ.	بصراحة ، لا أتفق مع هذا.
هل لك أن تتفضل وتملأ هذه ؟	بتقدر تتكرم و تعبي هاي؟	هل يمكنك أن تتفضل وتعبئ هذه ؟
يبدو أن النقود التي أعطيتني إياها ناقصة عشر دولارات .	شكله المصاري اللي إنطيتني اياها ناقصة عشر دولارات.	يبدو أن النقود التي أعطيتها لي ناقصة عشرة دولارات.
بالخارج .	برا.	بالخارج.
أريد ما يخصني لكي أرحل .	بدي اللي بخصني مشان أروح.	أريد ما يخصني للذهاب.
هل يمكن أن ترسلها إلى عنواني في اليابان عن طريق بريد الطرود الدولي وتحصل الثمن من هناك ؟	ممكن توديها على عنواني باليابان عن طريق صفحة الطرود الدولي و توخذ حقه من هناك ؟	هل يمكنك أن ترسلها إلى عنوانى في اليابان عن طريق صفحة الطرود الدولية وتأخذ حقه من هناك ؟
أين قسم السيدات ؟	وين قسم النسوان؟	أين قسم النساء ؟
إنه ألم حاد .	هو وجع قوي.	إنه ألم حاد.
إنني في نفس السن .	أني بنفس العمر.	أنا في نفس العمر.
فكرة جميلة .	فكرة حلوة.	فكرة جيدة.
هل الأجانب يمكنهم الحصول على الكتب في المكتبة ؟	بقدروا الأجانب يستخدموا الكتب بالمكتبة؟	هل يستطيع الأجانب استخدام الكتب في المكتبة ؟
تحية . أنا جون .	مرحبا. أني جون.	مرحبا. أنا جون.
هل يمكن أن نبدأ اللعب عندما ينتهون ؟	بنقدر نبلش نلعب لما يخلصوا؟	هل يمكننا البدء في اللعب عندما ينتهي اللاعبون ؟
مائة وخمسة وثلاثون ين للدولار الواحد .	مية وخمسة وثلثين ين للدولار الواحد.	مائة وخمسة وثلثين ين للدولار الواحد.
نعم . انتظر , سوف احضر لك واحدة .	طيب. استنى، راح أجيبلك وحدة.	حسناً. انتظر ، سأحضر لك واحدة.
هلا أنزلتني عند فندق هلتون من فضلك ؟	ممكن تنزلني عند فندق الهيلتون لو سمحت؟	هل لك أن تنزلني عند فندق هيلتون من فضلك ؟
أين الاستعلامات الرياضية ؟	وين الاستعلامات الرياضة؟	أين الاستعلامات الرياضية ؟
هذه هي فلوس أقلام الحبر . فاتورة بمائة دولار .	هايذ حق قلام الحبر. فاتورة بمية دولار.	هذا هو ثمن أقلام الحبر. فاتورة بقيمة مائة دولار.
لا ، شكراً . من الأفضل أن لا أشرب المزيد .	لا، شكراً. احسنلي ما أشرب اكثر من هيك.	لا ، شكراً. من الأفضل ألا أشرب أكثر من ذلك.
بما في ذلك الإفطار ، والضريبة ، ورسم الخدمة ، سيكون الحساب خمسة أربعون دولارا للشخص الواحد في الليلة .	بتشمل الفطور، الضرايب، ورسم الخدمة، الحساب رح يكون خمسة وأربعين دولار للواحد في الليلة.	تشمل الإفطار ، الضرائب ، ورسم الخدمة ، الحساب سيكون خمسة وأربعين دولاراً للفرد في الليلة.
ما عرض الأوبرا اليوم ؟	شو عرض الأوبيرا اليوم؟	ما هو عرض الأوبيرا اليوم ؟
أريد مقعداً يطل على الممر ، من فضلك .	بدي كرسي يطل عالممر، لو سمحت.	أريد مقعدا يطل على الممر ، من فضلك.
أجل أريد شيئاً أقرؤه .	أيوا بدي إشي أقراه.	نعم أريد شيئاً أقرأه.
غير محتمل بدرجة كبيرة .	بنطاقش بدرجة كبيرة.	لا أضيق بدرجة كبيرة.
هل تعرف المطعم يا كيويا ؟	بتعرف المطعم يا كيويا؟	هل تعرف المطعم يا كيويا ؟
يستطيع الصرافون أن يغيروا دولاراتك من أجل بقشيش الكازينو . هل نذهب ؟	السمسارين بقدروا يصرفولك الدولرات عشان بخشيش الكازينو. بصير نروح؟	السمسارين يستطيعون صرف الدولارات لك في كازينو. هل يمكن أن نذهب ؟
يسعدنا أن نقدم لك الشراب الذي تريده متبوعاً بالغداء . دليل كامل بالمشروبات التي نقدمها على رحلتنا موجودة في دليل المعلومات الخاص بمجلتنا .	بسعدنا إنه نقدملك العصير اللي بتختاره وبيلحقه الغدا . منوفر قائمة كاملة من الشراب في هاي الرحلة موجودة بقسم المعلومات تاع مجلتنا.	يسعدنا أن نقدم لك العصير الذي تختاره في هذه الرحلة. إن قائمة كاملة من الشراب في هذه الرحلة متوفرة في قسم المعلومات الخاص بمجلتنا.
هل أستطيع تأجير أداة للتنفس أثناء السباحة ؟	بقدر أستأجر شغلة للتنفس خلال السباحة؟	هل يمكنني استئجار آلة تنفس خلال السباحة ؟
آه . هل يمكنني الحصول على وجبتي فيما بعد ؟ أنا أشعر أنني لست على ما يرام الآن .	ممم. ممكن أخد وجبتي بعدين؟ حاسس حالي مش على بعضي هسا.	حسناً. هل يمكنني تناول وجبتي فيما بعد ؟ أشعر أنني لست على ما يرام الآن.
ما هو رقم الرحلة الجوية ؟	شو رقم رحلة الطيران؟	ما رقم رحلة الطيران ؟
أبغي تأجير سيارة من هذا الطراز لمدة يومين .	بدي استأجر سيارة من هاذ الموديل لمدة يومين.	أريد استئجار سيارة من هذا الطراز لمدة يومين.
أنا غير متأكد إذا كنت قد حزمت ملابس كافية لرحلة مدتها ثلاثة أيام .	أنا مش متأكد اذا جهزت وعية بتكفيني لرحلة مدتها ثلاث أيام.	أنا لست متأكداً إذا كنت قد جهزت وعاءاً يكفي لرحلة مدتها ثلاثة أيام.
يوجد بجانب هذا المبني تحديداً .	هو جنب هاذ المبنى بالتحديد .	إنه بجوار هذا المبنى بالضبط.
هه . هذه . يبدو اللون جميلاً عليك .	هه. هاي. شكل اللون حلو عليك كثير.	نعم. هذا. يبدو اللون جميلاً جداً عليك.
هل أستطيع تناول غذائي الآن ؟	ممكن أوكل هسا؟	هل يمكنني أن أتناول الطعام الآن ؟
هل يتوقف القطار في برايتون ؟	بوقف القطار عند برايتون؟	هل يتوقف القطار عند برايتون ؟
من المهم جدا أننا نستطيع الوصول إلى المواد الخام التي نحتاجها في المشروع .	اشي كثير مهم إنه قدرنا نوصل لمجموعة المواد الأساسية اللي راح نحتاجها للمشروع.	شيء عظيم جداً أن نصل إلى مجموعة المواد الأساسية التي نحتاجها في المشروع.
أود أن أطلب بدلة داكنة من أجلي .	بدي أطلب بدلة لونها غامق عشاني.	أريد أن أطلب بدلة بلون داكن من أجلي.
هذا جيد . متى هو ؟	هيك تمام. متى رح يكون؟	حسناً. متى سيكون ؟
أرغب في شراء شامبو .	أنا بدي أشتري شامبو.	أنا أريد شراء شامبو.
خمسون جنيهاً .	خمسين قنيه.	خمسون جنيهاً.
لا يوجد رسم ضروري .	مش موجود رسم ظروري.	ليس هناك رسم ظروري.
هل كان لديك أية خدمات أخرى إلى جانب طعام الإفطار هذا الصباح ؟	في عندك أي خدمات ثانية غير فطور الصبح؟	هل لديك أية خدمات أخرى غير إفطار الصباح ؟
متى يفتح المصرف ؟	أميت بفتح البنك؟	متى يفتح البنك ؟
إجمالي المبلغ المطلوب مائتان وثلاثة وأربعون جنيه ، يا سيدتي .	المبلغ الكلي بطلع ميتين وثلاثة وأربيعين جنيه، يا مدام.	المبلغ الإجمالي يبلغ مائتين وثلاثة وأربعين جنيهاً ، يا سيدتي.
لماذا لم يأت إلى الحفلة أمس ؟	ليش ما اجى على الحفلة امبارح؟	لماذا لم يأت إلى الحفلة أمس ؟
أريد لفتان من ISO مائة ، فيلم ملون ، ستة وثلاثين لقطة ، من فضلك .	بدي لفتين أيزو مية، فلم ملون، ستة وثلاثين لقطة ، لو سمحت.	أريد لفتين أيزو مائة ، فيلم ملون ، ستة وثلاثون لقطة ، من فضلك.
هل لديك مرآة ؟	عندك مراية؟	هل لديك مرآة ؟
هل من المقبول عدم اتباع أي شخص لتعليمات الأمن ؟	بصير حدا ما يتبع تعليمات الأمن؟	هل يمكن أن لا يتبع أحد تعليمات الأمن ؟
علىّ أن ألحق بطائرة العاشرة صباحاً .	لازم ألحق طيارة الساعة عشرة الصبح.	يجب أن ألحق بطائرة في العاشرة صباحاً.
من اين يمكنني الحصول على مسكوكة لركوب المترو ؟	من وين ممكن أجيب تذكرة لأركب المترو؟	من أين يمكنني الحصول على تذكرة لركوب المترو ؟
أين يمكنني تغير نقودي ؟	وين بقدر أصرف مصاريي؟	أين يمكنني صرف نقودي ؟
هل بها جهاز تدفئة ؟	بيها جهاز تدفئة؟	هل بها جهاز تدفئة ؟
أريد بعض الكريم الليلي .	بدي كريم ليلي.	أريد كريم ليلي.
كم تتقاضى ثمنا لإرسالها لليابان ؟	قديش بدك توخذ عشان تبعثها على اليابان؟	كم تتقاضى لإرسالها إلى اليابان ؟
أكيدا التي تتحدث معك ، أنا عندي حجز مائدة في تمام الساعة السادسة والثلث هذا المساء . ولكني آسفة لأني سأصل متأخرة نصف ساعة .	أكيدا يلي بتحكي. عندي حجز طاولة عالساعة ستة و ثلث المسا. بس آسفة لإني رح أوصل متأخرة نص ساعة.	أكيدا تقول. لدي حجز مائدة في السادسة وثلاثون دقيقة مساءاً. لكنني آسف لأنني سأصل متأخرة ثلاثين دقيقة.
متي سنستقل القارب ؟	متى بدنا نركب القارب؟	متى سنركب القارب ؟
أرغب في غرفة بحمام .	بدي غرفة بحمام.	أريد غرفة بحمام.
معذرة , متي ينتهي هذا الفيلم ؟	عفواً, متى بخلص هذ الفلم؟	معذرة. متى ينتهي هذا الفيلم ؟
لقد تمكنت من تحقيق ذلك .	قدرت أوصل لهذا الشي.	لقد استطعت الوصول إلى ذلك.
هل هو طريق طويل ؟	هو الطريق طويل؟	هل هذا الطريق طويل ؟
ما هي الأنواع التي لديكم ؟	شو الأنواع اللي عندكم؟	ما الأنواع التي لديكم ؟
سأرتبك . هل تمانع في رسم خريطة لي ؟	رح أرتبك. ما عندك مشكلة ترسملي خريطة؟	سأرتبك. هل لديك مشكلة في رسم خريطة لي ؟
لدينا جمبري رائع جداً اليوم .	عنا جمبري مميز كثير اليوم.	لدينا جمبري متميز جداً اليوم.
هل لديك أيّ خرائط بسيطة للمدينة ؟	عندي أي خرايط بسيطة للمدينة؟	هل لدي أي خرائط بسيطة للمدينة ؟
معذرة أريد الذهاب إلى فندقي في المدينة بالحافلة . أين يمكن أن أستقل حافلة ؟	عفواً، أنا بدي أروح على الفندق موجود بالمدينة بالباص. من وين بقدر آخذ باص؟	معذرة ، أنا أريد الذهاب إلى الفندق في المدينة بالحافلة. أين يمكنني أن أخذ حافلة ؟
شكراً . لكنني لا أعتقد أن عندي وقت للإقامة لمدة ليلتين . هل يمكنك حجز غرفة بسريرين لي في ذلك الفندق ليلة الثاني عشر من مارس فقط ؟	شكراً ، بس ما بتوقع أنه معي وقت عشان أظل ليلتين. ممكن تحجزلي غرفة مزدوجة في الفندق لليلة اثنعش ثلاث بس؟	شكراً ، ولكن لا أعتقد أن لدي وقت للبقاء ليلتين. هل يمكنك حجز غرفة مزدوجة في الفندق لليلة اثني عشر ثلاثة فقط ؟
بالتأكيد . كيف يمكننا خدمتك ؟	أكيد. كيف منقدر نخدمك؟	بالتأكيد. كيف يمكننا خدمتك ؟
شيكات سياحية . شكراً . خذ تذكرتك وبطاقة المرور للصعود على متن الطائرة . كن هناك قبل وقت الرحلة بساعة من فضلك .	شيكات سياحية. شكراً. أخذ تذكرتك و الفيزا عشان تطلع على الطيارة. كون هناك قبل الرحلة بساعة لو سمحت.	شيكات سياحية. شكراً. خذ تذكرتك والفيزا لتغادر على متن الطائرة. كن هناك قبل الرحلة بساعة من فضلك.
أوافق . يجب أن تصبح طبيعية جداً .	أنا موافق. لازم تصير طبيعة كثير.	أنا موافق. يجب أن تكون طبيعية جداً.
أهذه عيادة إف ؟	هاي عيادة إف؟	هل هذه هي عيادة إف ؟
هل لك أن تغيرهم إلى دولارات من فضلك ؟	ممكن تحولي اياهم لدولارات، لو سمحت؟	هل يمكنك تحويل أي منهم إلى دولارات ، من فضلك ؟
حسناً . أراك الساعة الثانية يوم الأحد .	تمام . بشوفك الساعة ثنتين يوم الأحد.	حسنا. أراك في الثانية يوم الأحد.
هل يمكنك أن تشذب شاربي ؟	ممكن لو سمحت ترتبلي شواربي؟	هل لك من فضلك أن ترتب لي شواربي ؟
أود أن أصرف هذا الشيك بسبعين دولاراً .	بدي أصرف هاذ الشيك بقيمة سبعين دولر.	أريد أن أصرف هذا الشيك بقيمة سبعين دولاراً.
الجزء المكتوب بالطريقة المائلة يشير إلى التغييرات التي حدثت في التسعينات .	الجزء اللي مكتوب بالطريقة المايلة بدل على التغييرات اللي صارت بالتسعينات.	الجزء المكتوب بالطريقة المايلة بدلا من التغييرات التي حدثت في التسعينات.
هل تشمل هذه الرحلة زيارة لبرج سيرز ؟	بتشمل هاي الرحلة زيارة لبرج سيرز؟	هل تشمل هذه الرحلة زيارة لبرج سيرز ؟
أين ستنتهي الجولة ، ومتى ؟	وين راح تخلص الرحلة، و أميت؟	أين ستنتهي الرحلة ، ومتى ؟
تفضل هذان دولاران . احتفظ بالباقي .	تفظل هي دولرين. خلي الباقي إلك.	أفضل هي دولارين. احتفظ بالباقي.
هل يوجد أي محل متعدد الأقسام قريب من هنا ؟	في أي مول قريب من هون؟	هل يوجد أي مول بالقرب من هنا ؟
هل ستزال تعمل جدول المواعيد ؟	هل رح تظل جدول المواعيد شغّالة؟	هل ستظل جدول المواعيد مشغولاً ؟
سوف آخذ هذه ، من فضلك .	راح آخذ هاظ ، لو سمحت.	سآخذ هذا ، من فضلك.
يقولون أن اليابان دولة غنية جداً .	بقولوا أنه اليابان بلد غني.	يقولون أن اليابان بلد غني.
ملعقتين , من فضلك .	معلقتين , لو سمحت.	معلقتين, من فضلك.
أجل ، واحدة فقط . متى سأعرف ؟ وكيف سيتم تعويضي ؟	أها، بس وحدة؟ متى رح أعرف؟ وكيف رح يكون التعويض؟	نعم ، ولكن واحدة ؟ متى سأعرف ؟ وكيف سيكون التعويض ؟
هناك ، أمام بيانات السائح تماما .	هناك ، قدام بيانات السايح بالزبط .	هناك ، أمام بيانات السائح بالضبط.
أين أجد الاسطوانات المدمجة ؟	وين بلاقي السيديات؟	أين يمكنني أن أجد السيديات ؟
أنا متأثر للغاية , لا أستطيع البقاء ساكنا .	أنا متأثر كتير, ما قادر أضل ساكت.	أنا متأثر جداً, لا أستطيع أن أبقى ساكتاً.
هل هو قريب لنصل إليه سيراً .	هو قريب عشان نوصلو مشي؟	هل هو قريب للذهاب سيراً ؟
إني من إسبانيا .	أنا من إسبانيا.	أنا من إسبانيا.
ـ أين أقرب محل جزارة ؟	وين أقرب لحام؟	أين أقرب لحام ؟
أود تأجير هذا الطراز من السيارات لمدة أربعة وعشرين ساعة .	بدي أستأجر هاذ الموديل من السيارات لمدة أربع وعشرين ساعة.	أريد أن أستأجر هذا الطراز من السيارات لمدة أربع وعشرين ساعة.
لا يمكن أن أبيع هذه دون روشتة .	ما بقدر أبيع هاي بدون وصفة طبية.	لا أستطيع بيع هذه بدون وصفة طبية.
هل لديك صحف يابانية ؟	عندك جرايد يابانية؟	هل لديك صحف يابانية ؟
هل هذا الحذاء متين ؟	هاذ البوط قوي؟	هل هذا الحذاء قوي ؟
لكنّي لدى موعد لرؤيتها في السّاعة الثّانية .	بس أنا عندي موعد عشان أشوفها الساعة ثنتين.	ولكن لدي موعد لرؤيتها في الساعة الثانية.
هل لديك غرف أكبر ؟	عندك غرف أكبر؟	هل لديك غرف أكبر ؟
اعطني عامل التليفون من فضلك .	إعطيني عامل التلفون لو سمحت .	أعطني عامل الهاتف من فضلك.
ظننت أنكم أيها الشباب تأكلون الكعك المخبوز فقط .	فكرت إنكو يا شباب بتوكلوا الكعك المخبوز بس.	فكرت يا شباب أنكم تأكلون الكعك المخبوز فقط.
أريد استئجار كرسي مركب .	بدي أستأجر كرسي اتمدد عليه.	أريد استئجار مقعد للتمدد عليه.
أنا أبحث عن شيء أنيق .	أني بدور على اشي لايق.	أنا أبحث عن شيء أنيق.
حسناً . هل يجب أن أقوم بتركيزها ؟	ماشي. لازم أساويها مركزة؟	حسناً. هل يجب أن تكون مركزة ؟
قهوة مع القشدة والسكر ، من فضلك .	قهوة مع القشطة والسكر، لو سمحت.	قهوة بالقشدة والسكر ، من فضلك.
سوف ننتظر . من فضلك اتصل بنا عندما تكون مستعداً .	رح نستنى . لو سمحت, إتصل فينا لما تكون جاهز.	سننتظر. من فضلك اتصل بنا عندما تكون جاهزاً.
فقط سياحة .	بس للسياحة.	فقط للسياحة.
أحتاج إلى طيب .	بدي دكتور.	أريد طبيباً.
إن الجونلات القصيرة ومعها الأحذية الطويلة لن تنقضي موضتها .	مش ممكن تخلص موضة التنانير القصيرة مع الجزم الطويلة.	لا يمكنك أن تنتهي موضة التنانير القصيرة مع الجزم الطويلة.
ألا ترغب في فنجان شاي ؟	ما بدك تشرب كاسة شاي؟	ألا تريد أن تشرب كوبا من الشاي ؟
ليس تماماً . فقط شيء ما غير غالي الثمن .	مش هيك. بس إشي مش غالي.	ليس هذا. لكن شيء غير غالي.
إذا كنت تودّ ، بإمكاننا الاستراحة هنا .	إذا إنت حاب، ممكن نستريح هون.	إذا كنت تحب ، يمكننا أن نستريح هنا.
هل هذه كلها هي حقائبك ؟	هاي كلها شناتيك؟	هل هذه كلها حقائبك ؟
هل تريد بالحلويات ؟	بدك حلويات؟	هل تريد حلويات ؟
نعم ، لكن ليس قويا جدا .	اه ، بس مش قوي كثير.	نعم ، لكنه ليس قوياً جداً.
ويسكي وماء ، من فضلك . هل لديكم وجبة خفيفة معه ؟	ويسكي ومي، لو سمحت. عندكم سندويشة صغيرة او شيء خفيف معه؟	ويسكي ومي ، من فضلك. هل لديكم سندويتش صغير أو شيء خفيف معه ؟
أتعرف كاثي ؟ إنه عيد ميلادها .	بتعرف كاثي؟ هاي حفلة عيد ميلادها.	هل تعرف كاثي ؟ إنها حفلة عيد ميلادها.
أود تحميض هذا الفيلم . متي سيكون جاهزا ؟	بدي أحمض هالفلم. متى رح يكون جاهز؟	أريد تحميض هذا الفيلم. متى سيكون جاهزاً ؟
تشغل أشخاصاً جدد في أبريل .	رح توظف ناس جداد في نيسان.	سوف توظف موظفين جدد في أبريل.
سأكون سعيدا بذلك . متى ترغب في ذلك ؟	رح اكون مبسوط لهالشي. متى بدك ياه؟	سأكون سعيداً لذلك. متى تريد ذلك ؟
رائع .	بجنن.	إنه رائع.
من فضلك اتجه يساراً عند التقاطع التالي .	لو سمحت روح عاليسار بالتقاطع الجاي.	من فضلك اتجه يساراً في التقاطع القادم.
هلا أريتني بعض الفساتين ؟	ممكن توريني شوي من الفساطين؟	هل لك أن تريني بعضاً من الفساتين ؟
أين المقهى ؟	وين الكوفي شوب ؟	أين الكوفي شوب ؟
لا يمكنك جلب الألعاب النارية إلى كندا .	ما بتقدر تجيب ألعاب نارية على كندا.	لا يمكنك أن تحضر ألعاب نارية إلى كندا.
اعتقد أن هذا عالي قليلا بالنسبة لي .	بتوقع أنه شوي عالي بالنسبة الي.	أعتقد أنه مرتفع قليلاً بالنسبة لي.
لم يعد بإمكانك حقيقةً أن تقوم بعمل تصميم دون كمبيوتر بعد الآن .	بطلت تقدر تعمل تصميم بدون كمبيوتر من هون و طالع.	لا يمكنك أن تقوم بعمل تصميم بدون كمبيوتر من هنا أو هناك.
أريد اسطوانة مدمجة .	بدي سي دي.	أريد سي دي.
هل يمكنني حجز غرفة بسريرين تطل على المحيط ؟	بصير أحجز غرفة بتختين بطل على البحر؟	هل يمكن أن أحجز غرفة بسريرين تطل على البحر ؟
مايومي , هل تسمح أن تملأ هذه الورقة بتوقيعك ؟	مايومي، ممكن تعبيي هاي الورقة بتوقيعك؟	ماومي ، هل يمكنك أن تملأ هذه الورقة في توقيعك ؟
هلا أرشدتني إلى مطعم مفضل بين الشبان ؟	ممكن ادلني على مطعم معروف بين الشباب؟	هل يمكن أن تدلني على مطعم معروف بين الشباب ؟
حجزنا مقعداً ليوم الخامس والعشرين من أكتوبر في الساعة الحادية عشر صباحاً .	حجزنا مقعد لخمسة و عشرين من شهر عشرة الساعة احدعش الصبح.	حجزنا مقعداً لخمسة وعشرين من أكتوبر في الساعة الحادية عشر صباحاً.
إن الناس ودودون جداً .	الناس حابيين كثير.	الناس محبون جداً.
متى يتعين علي أن أكون في المحطة ؟	أي وقت لازم أكون بالمحطة؟	في أي وقت يجب أن أكون في المحطة ؟
ليس هذا صحيحاً . أنت دائما تعاملني .	هاظ مش صحيح . إنت دايما بتعاملني.	هذا ليس صحيحا. أنت دائما ما تتعامل معي.
ما نوع العصير الذي تفضله ؟	شو نوع العصير اللي بتحبه ؟	أي نوع من العصير تحب ؟
هل لي في بعض الفلفل ؟	ممكن أخذ شوي فلفل؟	هل يمكن أن آخذ بعض الفلفل ؟
احتاج إلى بعض الهدايا التذكارية من نيويورك .	أنا بدي شوية هدايا تذكارية من نيويورك.	أنا أريد بعض الهدايا التذكارية من نيويورك.
اسمي " تارو تاناكا " لدي حجز مسبق .	اسمي " تارو تاناكا " عندي حجز من قبل.	اسمي " تارو تاناكا " لدي حجز من قبل.
إنها الثالثة والربع .	الساعة ثلاثة وربع.	الساعة الثالثة وخمسون دقيقة.
كم التكلفة كلها ؟	قديش الكلفة كلها؟	كم التكلفة الإجمالية ؟
لا أدري كم من النقود يجب علىّ تركه كبقشيش ؟	ما بعرف قديش لازم أترك بغشيش.	لا أعرف كم يجب أن أترك بغشيش.
سآخذ شيكولاتة ساخنة .	بدي آخذ هوت شوكليت.	أريد أن آخذ هوت شوكليت.
ماذا تنوي أن تفعل عقب الانتهاء من المدرسة . ؟	شو بتخطط تعمل بعد ما تخلص مدرسة؟	ماذا تخطط بعد أن تنتهي من المدرسة ؟
أشعر بالغثيان .	بحس حالي بدي أتقيء.	أشعر بالتقيء.
ماذا ؟ هل عليك دفع ضرائب عندما يكون لديك أكثر من ثلاثة زجاجات كحول ؟	شو؟ عليك ضرايب بس يكون عندك أكثر من ثلاث قناني كحول؟	ماذا ؟ هل عليك ضرائب عندما يكون لديك أكثر من ثلاث زجاجات كحول ؟
لقد حصلت على بطارية فارغة .	بطاريتي صارت فاضية.	بطاريتي أصبحت فارغة.
معذرة . أنا طالب جامعي من اليابان . هل أنتم طلاب في جامعة نيويورك ؟	معلش، أنا طالب جامعي من اليابان. إنتوا طلاب بجامعة نيو يورك؟	معذرة ، أنا طالب جامعي من اليابان. هل أنتم طلاب بجامعة نيو يورك ؟
من الذي يعزف ؟	مين اللي عم يعزف؟	من يعزف ؟
معطف رائع . هل هو صناعة بريطانية ؟	جاكيت حلو. هاد صنع بريطاني؟	ملابس جميلة. هل هذا صنع بريطاني ؟
هل لديكم فيلم شفاف ملون ؟	عندك فلم شفاف ملون؟	هل لديك فيلم شفاف ملون ؟
أين قسم السيدات ؟	وين قسم النسوان؟	أين قسم النساء ؟
جميل الفستان التي ترتدينه .	حلو الفسطان اللي لابسيته.	جميل الفستان الذي ارتديه.
تموج شعر دائم مشدود من فضلك .	كيرلي عطول مشدود، لو سمحت.	كيرلي مشدود ، من فضلك.
هل لدينا وقت كاف لإنهاء إجراءات المغادرة ؟	معنا وقت كافي لنخلص إجراءات المغادرة؟	هل لدينا وقت كاف لإنهاء إجراءات المغادرة ؟
هل هناك جولة بالحافلة تجوب المدينة ؟	في دورة بالباص نلف بالبلد؟	هل هناك دورة في الحافلة نقطع في البلد ؟
هل أستطيع الحصول على تذكرة متعددة الاستخدام ؟	ممكن أوخذ بطاقة ذكية؟	هل يمكنني الحصول على بطاقة ذكية ؟
كان فيلم " حرب الكواكب " أكثر الأعمال شعبية عام ألف وتسعمائة وأربعة وثمانون .	كان فيلم "حرب الكواكب" من أشهر الأفلام سنة ألف وتسعمائة وأربعة وثمانون.	كان فيلم " حرب الكواكب " من أشهر الأفلام في عام ألف وتسعمائة وأربعة وثمانون.
أوه ، يجب أن تخطر القنصلية على الفور .	أوه، لازم تبلغ القنصلية هسا.	أوه ، عليك إبلاغ القنصلية حالاً.
هل يوجد ملهى ليلي جيد به عرض رقصة الفلامنكو ؟	في نايت كلوب رايق عنده رقصة الفلامنكو؟	هل يوجد ناد رياضي جيد يقدم رقصة الفلامنكو ؟
لماذا لم تقلع الرحلة ؟ أخبرني عما يجري .	ليش ما طلعت الرحلة؟ قلي شو بصير.	لماذا لم تخرج الرحلة ؟ أخبرني ماذا يحدث.
سأصبح بديناً في حال ما ظللت جالساً هنا آكل باستمرار .	رح أصير ناصح لو استمريت قاعد هون آكل دايما.	سأكون ناصح لو استمررت في تناول الطعام هنا دائماً.
هل على السيدات ارتداء فستان سهرة ؟	لازم الستات يلبسن فسطان سهرة؟	هل يجب على السيدات ارتداء فستان سهرة ؟
حسنا إذاً ، أريد عصا مضرب أصغر كتلك التي مع جوليا روبرتس .	ماشي يعني، بدي عصاة مضرب اصغر مثل اللي مع جوليا روبرتس.	حسناً ، أريد عصا مضرب أصغر مثل التي مع جوليا روبرتس.
أريد أن اتصل هاتفياً بالسفارة اليابانية .	بدي أحكي بالتلفون مع السفارة اليابانية.	أريد إجراء اتصال هاتفي بالسفارة اليابانية.
هل هذه السجائر معتدلة ؟	هاي السقاير معتدلة؟	هل هذه السوستة معتدلة ؟
هل هذا طلب شخص آخر .	هاظا طلب واحد ثاني؟	هل هذا طلب واحد آخر ؟
في حالة إمكان ذلك , احجز منضدة بالقرب من النافذة من فضلك .	لو في امكانية, احجزلي طاولة عند الشباك لو سمحت.	لو سمحت, احجز مائدة بالقرب من النافذة من فضلك.
هل يمكن أن نحجز طاولة لخمسة أشخاص ؟	ممكن نحجز طاولة لخمس أشخاص؟	هل يمكن أن نحجز مائدة لخمسة أفراد ؟
شركة الخطوط الجوية اليابانية ، طائرة رقم واحد اثنان ثلاثة .	شركة الخطوط الجوية اليابانية، رحلة الطيران رقم واحد اثنين ثلاثة.	شركة الخطوط الجوية اليابانية ، رحلة الطيران رقم واحد اثنان ثلاثة.
من فضلك اتصل بي في الفندق عندما تجد حقائبي .	من فضلك، كلمني بالفندق لما تلاقي شنطي.	من فضلك ، اتصل بالفندق عندما تجد حقائبي.
ذلك الحد الأدنى للسعر .	هيك أقل سعر.	هكذا أقل سعر.
أنت محظوظ .	إنت محظوظ.	أنت محظوظ.
هل سيكون هذا المتجر مفتوحاً غداً ؟	راح يكون هاظ المحل فاتح بكرا؟	هل سيكون هذا المتجر مفتوحاً غداً ؟
وصلت الفاتورة لمائة دولار .	وصلت الفاتورة لمية دولار.	وصلت الفاتورة إلى مائة دولار.
هل هذا مكتب الاستقبال ؟ هل يوجد عيادة قريبة ؟	هاظ مكتب الاستقبال؟ في عيادة قريبة من هون؟	هل هذا مكتب الاستقبال ؟ هل توجد عيادة بالقرب من هنا ؟
كم عمر ابنتك ؟	قديش عمر بنتك؟	كم عمر بنتك ؟
لن ينضم للجولة الاختيارية إلا القليل من الناس .	ما رح ينضم للجولة الاختيارية غير شوي من الناس.	لن ينضم إلى الجولة الاختيارية إلا قليل من الناس.
إنها مجرد هدية تعبيرا عن تقديري .	هاي مجرد هدية تعبير عن تقديري.	هذه مجرد هدية للتعبير عن تقديري.
تحتاج لرؤية أخصائي .	بتحتاج تشوف دكتور متخصص.	تحتاج لرؤية طبيب متخصص.
كم تكلّف هي لكل جالون ؟	كم سعر الغلون الواحد؟	كم سعر الغليون الواحد ؟
أيمكنني الحصول على جدول زمني ، من فضلك ؟	ممكن أحصل على جدول الوقت، لو سمحت؟	هل يمكن أن أحصل على جدول الوقت ، من فضلك ؟
لقد سُرقت حقيبتي .	انسرقت شنتتي.	لقد سُرقت حقيبتي.
نستخدم الأعواد عندما نأكل .	بنستعمل العيدان لما بنوكل.	نستخدم العيدان عندما نتناول الطعام.
حسناً ، في حالة إصرار كليكما , سأذهب معكما .	طيب، اذا انتو الاثنين مصرين، أني راح اروح معكو.	حسناً ، إذا كنتم متفقين ، سأذهب معكم.
في أي محطة سأنزل للذهاب إلى مبنى إمباير ستيت ؟	بأي موقف لازم انزل عشان أروح على عمارة امباير ستيت؟	في أي موقف يجب أن أنزل للذهاب إلى عمارة إمباير ستيت ؟
لابد أن تأخذها تسعة وتسعون مرة في اليوم ، قبل الوجبات .	لازم تاخذها تسعة وتسعين مرة باليوم، قبل الأكل.	عليك أن تأخذها تسعة وتسعين مرة في اليوم ، قبل الوجبات.
لا يا سيدي . هذه الظهيرة محجوزة بالكامل . ومع ذلك يمكن أن تحجز غدا .	لا، يا أستاذ، اليوم بعد الظهر كله محجوز. لكن بتقدر تحجز بكرا .	لا ، يا سيدي ، اليوم بعد الظهر كله محجوز. لكن يمكنك الحجز غداً.
هل هناك طبيب للفندق أو واحد على صلة بالفندق .	في دكتور للفندق أو واحد ع علاقة بالفندق؟	هل يوجد طبيب للفندق أو شخص على علاقة بالفندق ؟
المياه الساخنة ليست ساخنة بالقدر الكافي .	المية الحامية مش حامية بشكل كافي.	المياه الحامية ليست ساخنة بشكل كاف.
هل استرحت في نومك ؟	ارتحت بالنومة؟	هل استمتعت بالنوم ؟
أريد إعادة المال . هل يمكن أن أحصل على مالي ؟	بدي أرجع المصاري. بقدر أوخذ مصرياتي؟	أريد استرداد النقود. هل يمكنني الحصول على نقودي ؟
انها باتجاه الجنوب .	هي باتجاه الجنوب.	إنها باتجاه الجنوب.
ما سعر تذكرة درجة أولى إلى إدنبره , من فضلك ؟	كم سعر تذكرة درجة أولى لإدنبره , إذا تكرمت.	ما سعر تذكرة درجة أولى إلى إدنهبره, من فضلك.
عندي قشعريرة .	عندي قشعيرية.	لدي قشعيرية.
لماذا , شكرا جزيلا . هل أستطيع الارتقاء للقمة ؟	ليش، شكراً كثير الك. بقدر اطلع للقمة؟	لماذا ، شكراً جزيلاً لك. هل يمكنني الوصول إلى القمة ؟
لا . هل تحب الإبلاغ عنه ؟	لا . بدك تبلغ عنو ؟	لا. هل تريد أن تبلغ عنه ؟
من فضلك غير هذه الينات إلى جنيهات .	لو سمحت اصرفلي هظول من ين لقنيه.	من فضلك اصرف هؤلاء من ين إلى جنيه.
سآخذ مقاعد درجة رجال أعمال ، أليس كذلك ؟	راح آخد مقاعد درجة رجال الأعمال، صح؟	سآخذ مقاعد درجة رجال الأعمال ، أليس كذلك ؟
لا أستطيع أن أفعل ذلك , لكني سوف أضعها في الحقيبة لك .	ما بقدر اعمل هيك , بس رح احطها بالشنتة الك .	لا أستطيع القيام بذلك ، ولكن سأضعها في الحقيبة الخاصة بك.
إنه غالي الثمن إلى حد ما . ألا يمكنك منحي خصماً ؟	هاد كثير غالي. ما فيك تعطيني شوية خصم؟	هذا غالي جداً. ألا يمكنك أن تعطيني بعض الخصم ؟
إن " السنة " متقلقلة .	ال"سنة" عم تتقلب.	إن " سنة " تتقلب.
سيكون جاهزا بعد غد في المساء .	راح يكون جاهز بعد بكرا المسا.	سيكون جاهزا بعد غد مساء.
هل ليدكم صناديق لإرسال الطرود ؟	عندكم علب لارسال الطرود ؟	هل لديكم علب إرسال الطرود ؟
إن عثرت على شيء ، اتصل بي من فضلك .	لو لقيت إشي، رنلي إذا تكرمت.	إذا وجدت شيئاً ، اتصل بي من فضلك.
أود تقصيره ببوصة واحدة من هذه المنطقة .	بدي اقصّره بوسطة وحدة من هادي المنطقة.	أريد أن أقصّره في وسط واحدة من هذه المنطقة.
هل لديكم أي خبز ؟	عندكم خبز؟	هل لديكم خبز ؟
أود بعض البيجامات .	بدي بيجامات.	أريد بيجامات.
أين يمكنني طباعة الفيلم ؟	وين بقدر أطبع الفلم؟	أين يمكنني طبع الفيلم ؟
أيمكنك الحضور إلى هنا لإصلاحه ؟	ممكن تيجي هون عشان اتصلحه؟	هل يمكنك أن تأتي إلى هنا لكي أتصل به ؟
أين يمكنني أن أستقل حافلة لمشاهدة المعالم ؟	من وين ممكن اركب باص لحتى اتفرج ع المعالم؟	من أين يمكنني أن أستقل حافلة لمشاهدة المعالم ؟
مرحبا يا سيدة ياماجوتشي ؟ فريقك على الخط . قبلت دعوتك . استمر من فضلك .	أهلا وسهلا يا سيدة ياماجوتشي، فريقك عم يكلمك. رديت على دعوتك. استمري، من فضلك.	مرحباً يا سيدة ياماجوتشي ، فريقك يتحدث. لقد وافقت على دعوتك. سر ، من فضلك.
هل لك أن تساعدني في الوصول إلى حقيبتي ؟	ممكن تساعدني ألاقي شنتيتي؟	هل لك أن تساعدني في العثور على حقيبتي ؟
آسف لقد نفذ هذا الصنف لدينا .	معذرة، هاد النوع خلص عنا.	معذرة ، هذا النوع انتهى عندنا.
ما اسم الشخص الذي تود التحدث إليه ؟	شو اسم الشخص اللي بدك تحكي معه؟	ما اسم الشخص الذي تريد التحدث إليه ؟
لقد اجتزت هذا الاختبار بنجاح كبير .	عديت الامتحان بنجاح كبير .	لقد فزت بالامتحان بنجاح كبير.
طبقاً لتقرير الطقس ، فإن غداً سيشهد سقوط جليد .	بناءً على النشرة الجوية، راح تثلج بكرا.	وفقاً للنشرة الجوية ، سوف تمطر ثلجاً غداً.
لا أستطيع ضبط اللوحة .	مش قادر أزبط الصورة.	لا أستطيع ضبط الصورة.
لا زالت غالية جدا . هل من الممكن أن آخذها بثلاثة دولارات ؟	بعدها غالية كثير. ممكن أشتريها بـثلث دولارات؟	إنها غالية جداً. هل يمكن أن أشتريها بثلاثة دولارات ؟
نريد اثنين هامبورجر واثنين قهوة ، من فضلك ، نريد تناولها خارج المحل .	بدنا زوج همبرجر وزوج قهوة، لو سمحت، بدنا ناكلها برة المحل.	نريد زوج همبرجر وزوج قهوة ، من فضلك ، نود تناولها خارج المتجر.
زدني قليلاً .	زيدني شوي.	زدني قليلاً.
هل لي بشوكة أخرى ؟	بدي شوكة ثانية؟	أريد شوكة أخرى ؟
أنا هنا في مهمة إعلامية .	أنا هون بشغل إعلامي.	أنا هنا في عمل إعلامي.
إنها ليست أحدث طراز ، أليس كذلك ؟	هاي مش أحدث موديل ، صح؟	إنها ليست أحدث موديل ، أليس كذلك ؟
أبغي بعض الأقراص المنومة .	بدي حبوب منوم.	أريد بعض حبوب المنوم.
أي حافلة تذهب إلى وسط المدينة ؟	أي باص رايح عالدوار الرئيسي؟	أي حافلة تتجه إلى الدوار الرئيسي ؟
أريد الذهاب إلى مركز هارفارد . هل يمكن أن تخبرني عندما نصل إلى هناك ؟	بدي اروح على مركز هارفارد. ممكن تقلي لما نوصل هناك؟	أريد الذهاب إلى مركز هارفارد. هل يمكنك أن تخبرني عندما نصل إلى هناك ؟
أريد أن أحجز على شركة نورث وست إيرلينز على الرحلة رقم صفر ثمانية ستة في الخامس .	بدي احجز على شركة نورث وست إيرلينز على الرحلة رقم صفر ثمانية ستة بخمسة الشهر.	أريد الحجز على شركة نورث وست إيرلينز على الرحلة رقم صفر ثمانية ستة في الخامس من يونيو.
لقد استمتعت بالوجبة كثيراً جداً .	كثير استمتعت بالوجبة.	استمتعت بالوجبة.
سيكون هناك تأخير بسيط .	راح يكون في تأخير بسيط.	سيكون هناك تأخير بسيط.
فقط إذا كانت ملكك ، سيدي . هاها ، مزحة صغيرة .	بس اذا كانت ملكك ، يا سيدي . ههههههه، هاي مزحة صغيرة.	فقط إذا كانت ملكك ، يا سيدي. ههههه ، إنها مزحة صغيرة.
نستطيع أن نرتب لتنظيف غرفاتكم .	ممكن نرتب معك عشان تنظيف غرفكم.	يمكننا أن نرتب معك لتنظيف غرفكم.
وما هي المثانة ؟	وشو هي المثانة ؟	ما هي المثانة ؟
لا أستطيع النوم جيداً أثناء الليل .	ما قدرت أنام مليح بالليل.	لم أستطع النوم جيداً الليلة.
ما هو مستوى مهارتك في عزف الكمان ؟	شو مستواك بعزف الكمان؟	ما هو مستواك في عزف الكمان ؟
ما هي أكثر الأشياء التي تثير اهتمامك الآن ؟	شو أكثر الأشياء اللي بتلفت انتباهك هسا ؟	ما أكثر الأشياء التي تلفت انتباهك الآن ؟
اجعل قصة الشعر تتدلى لأسفل , من فضلك .	خلي قصة الشعر تنزل لتحت، لو سمحت.	دع قصة الشعر تنزل إلى أسفل ، من فضلك.
هل لك أن تستدعي لي سيارة أجرة الساعة الثامنة صباح غد ؟	ممكن تجيبلي تكسي بكرا الساعة ثمنية الصبح؟	هل يمكنك أن تحضر سيارة أجرة لي غدا في الثامنة صباحا ؟
هلا ملأت هذا النموذج ؟	ممكن تعبي هاذ النموذج؟	هل يمكنك أن تملأ هذا النموذج ؟
أيمكنك الانتهاء من ذلك بعد عشر دقائق ؟	بتقدر تخلص هاي بعد عشر دقايق؟	هل يمكنك إنجاز هذه في غضون عشر دقائق ؟
الملح من فضلك .	الملح لو سمحت.	الملح من فضلك.
لقد نمت و لم أتيقظ حين رن منبه السادسة و النصف .	نمت و ما صحيت ع منبه الساعة ستة ونص.	نمت ولم استيقظت على منبه في السادسة والنصف.
نحن من أكبر موردي أجهزة الميكروكومبيوتر .	إحنا من أكبر موردين لأجهزة الميكرو كمبيوتر .	نحن أكبر موردين لأجهزة الميكرو كمبيوتر.
من فضلك أخبرني كيف أملأ بطاقة النزول إلى البر ؟	لو سمحت قلي كيف أعبي بطاقة النزول للبر؟	من فضلك أخبرني كيف أملأ بطاقة النزول إلى البر ؟
دجاج محمر ، من فضلك .	دجاج مشوي، لو سمحت.	دجاج مشوي ، من فضلك.
أجل ، ولكن هذا كثير جدا ، ولقد شبعت بالفعل .	أيوة، بس هاي كتير كثير ، وأنا صرت أكلت كفاية.	نعم ، لكن هذا كثير جداً ، وأنا قد أكلت كفاية.
لقد أُغلق علي الباب . هل يمكن أن تفتح بابي , من فضلك ؟	ييي تسكر علي الباب . بتقدر تفتحلي الباب، لو سمحت؟	نعم تغلق الباب. هل لك أن تفتح الباب ، من فضلك ؟
بكل تأكيد . سنكون سعداء لفعل هذا .	أكيد. راح نكون مبسوطين نعمل هيك.	بالتأكيد. سنكون سعداءً لفعل ذلك.
يقولون إن الأنفلونزا منتشرة هناك .	بيقولوا انو الإنفلونزا معمية هنيك.	يقولون أن أنفلونزا معمي هنا.
هل ستدفع شركة الطيران رسوم الفندق والوجبات ؟	رح تدفع شركة الطيران رسوم الفندق والوجبات؟	هل ستدفع شركة الطيران رسوم الفندق والوجبات ؟
نسيت تذكرة الطيران الخاصة بي في الفندق .	نسيت تذكرة الطيارة قيتي بالفندق.	لقد فقدت تذكرة الطائرة الخاصة بي في الفندق.
هل يمكن أن احصل على احدى المجلات أو شيئ من هذا القبيل ؟	ممكن أوخذ وحدة من المجلات أو شي زي هيك؟	هل يمكن أن آخذ واحدة من المجلات أو شيء من هذا القبيل ؟
تناسبني تماما .	مناسبيتني كثير.	إنها محببة جداً.
خذني إلى المستشفى .	خذني على المستشفى.	خذني إلى المستشفى.
ربما كان يعاني سّدَّة تنفسية .	ممكن عنده صعوبة بالتنفس.	ربما يعاني من صعوبة في التنفس.
كم تكلفة الذهاب إلى فندق سي ؟	قديش بتكلف الروحة لفندق سي؟	كم يتكلف الذهاب إلى فندق سي ؟
هل هناك أي غرف خالية في عربة النوم ؟	ظل في أي غرف فاظية بعرباية النوم؟	هل ظل في أي غرف متاحة في عربة النوم ؟
هل يوجد بوتيك قريب من هنا ؟	في بوتيك قريب من هون؟	هل يوجد متجر بالقرب من هنا ؟
عندما أرى الأسعار بهذا الرخص ، يبدو الأمر سخيفاً أن أشتري أي شيء في اليابان .	لما أشوف الأسعار بهالرخص ، بحس أنه مسخرة الواحد يشتري أي شي باليابان.	عندما أرى الأسعار بهذا السعر ، أشعر بأنه من السخرية أن يشتري المرء أي شيء في اليابان.
لم يخرج من الماكينة شيء .	ما طلع من الماكينة إشي.	لم يخرج من الماكينة شيء.
كم كان ثمنها ؟	قديش كان حقها ؟	كم كان ثمنها ؟
أريد هدية بمناسبة الذكرى السنوية .	بدي هدية لمناسبة الذكرى السنوية.	أريد هدية بمناسبة الذكرى السنوية.
علي أن ألحق طائرة متجهة للوس أنجليس باكر صباح غد .	لازم ألحق طيارة لوس أنجلوس بكرا الصبح بكير.	يجب أن ألحق بطائرة لوس أنجلوس صباح الغد.
يا صاح , أتعرف أي مكان يستحق الرؤية قريبا من هنا ؟	أخوي، بتعرف أي مكان محرز الشوفة قريب من هون؟	أخي. هل تعرف أي مكان لمشاهدة الصورة بالقرب من هنا ؟
عندي الكثير من الوقت .	عندي وايد وقت.	لدي الكثير من الوقت.
من أين يمكنني شراء بعض الهدايا التذكارية ؟	منين بقدر أشتري شوية هدايا تذكارية ؟	من أين يمكنني شراء بعض الهدايا التذكارية ؟
أنظر إلى هذا . انظر إلى هذا . سوف تخبرني أن الاختلاف بين هذا الشاب وذلك الشاب هو الحظ ؟ محمد ، يقف بالسيارة في جانب الطريق ، وأنت ؟ لن تمانع في أن أنام معك هنا . أنا متأخر . كان لقاء جميل معك ؟	شوف هاظ. شوف هاظ. راح تحكيلي انو الفرق بين هالشب وهذاك الشب هو الحظ؟ محمد، واقف بالسيارة على زقاق الشارع، وإنت؟ ما راح تعترض اذا قعدت معك هون. انا تأخرت. كان لقاء حلو معك؟	انظر إلى هذا. انظر إلى هذا. هل ستقول لي إن الفارق بين هذا الشاب وذاك هو الحظ ؟ محمد ، يقف بالسيارة على زقاق الشارع ، وأنت ؟ لن تعترض إذا جلست معك هنا. لقد تأخرت. هل كان لقاءً رائعاً معك ؟
أعمل في شركة تجارية .	أني بشتغل بشركة تجارية.	أنا أعمل في شركة تجارية.
أفهم ، لكن لا أستطيع أن أقولها .	فاهم، بس بقدر أقولها.	أفهم ، لكن يمكنني أن أقولها.
نصف زجاجة , من فضلك .	نص قنينة ، لو سمحت.	نصف زجاجة ، من فضلك.
متى تقام مباراة كرة القدم ؟	متى بتبلش مباراة كرة القدم؟	متى تبدأ مباراة كرة قدم ؟
ما هو متوسط أسعاركم للفاكس الدولي كل شهر ؟	كم معدل تكلفة الفاكس الدولي كل شهر؟	كم معدل تكلفة الفاكس الدولي كل شهر ؟
انتظر دقيقة من فضلك .	استنى دقيقة لو سمحت.	انتظر دقيقة من فضلك.
هل هو محجوز بالكامل ؟	هو محجوز كله؟	هل هو محجوز كله ؟
شيء خطأ مع حقيبتك .	اشي غلط بشنتك .	شيء خطأ في حقيبتك.
كلا منا يريد أن يحاسب على وجبته .	إحنا كل واحد بدو يدفع عن أكلته.	نحن ندفع عن أكلتنا.
ألم تتلق الاستمارة بالطائرة ؟	ما أخذت الاستمارة بالطيارة؟	لم أحصل على الاستمارة بالطائرة ؟
هل لديك أي شيء لفترة أطول قليلاً ؟	عندك أي اشي لوقت أطول شوي؟	هل لديك أي شيء لفترة أطول قليلاً ؟
أجل ، من فضلك أرسله إلى الغرفة اثنا عشر أربعة وثلاثون .	أيوه، لو سمحت وديه على الغرفة اثنعش أربعة وثلاثين.	نعم ، من فضلك أرسل هذا إلى الغرفة اثني عشر أربعة وثلاثين.
أين البحيرة ؟	وين البحيرة؟	أين البحيرة ؟
هل هناك حافلة تذهب مباشرة إلى هناك ؟	في أي باص بروح هناك مباشرة؟	هل هناك أي حافلة تذهب إلى هناك مباشرة ؟
أريد هذا الطراز لخمسة أماكن مرصعة .	بدي هاي النوعية لخمس أماكن مرصعة.	أريد هذه النوعية لخمسة أماكن مرصعة.
هل لك أن تغلف هذه كالهدية ؟	ممكن تلفلي هاي كهدية؟	هل يمكنك أن تلف هذه كهدية ؟
نعم لدينا هذا ، سوف نجهزها لك .	اه موجود عنا. رح نجهزلك اياه.	نعم لدينا. سنجهز لك ذلك.
هل يمكنك تبديل هذه بواحدة جديدة ؟	ممكن تبدلي هاي بوحدة جديدة؟	هل يمكنك أن تبدل هذه بواحدة جديدة ؟
عفواً . ستكون جاهزة في غضون خمس دقائق .	عفوا. رح تكون جاهزة خلال خمس دقايق.	معذرة. ستكون جاهزة خلال خمس دقائق.
أين يمكنني أن أشتري إبريقاً ؟	من وين بقدر اشتري بريق؟	من أين يمكنني شراء بريق ؟
أعتقد أن عمره أكثر من خمسين سنة .	بتوقع عمره اكثر من خمسين سنة.	أعتقد أنه يبلغ من العمر أكثر من خمسين عاماً.
أود أن أطلب , من فضلك .	بدي أطلب , بعد إذنك.	أريد أن أطلب, من فضلك.
معذرة . كيف يمكنني الوصول إلى المصرف ؟	معلش، كيف بقدر أوصل للبنك؟	معذرة. كيف أستطيع الوصول إلى البنك ؟
لدي بعض الملابس للمغسلة .	عندي شوية وعية للغسيل.	لدي بعض الوعاء للغسيل.
كريمة وسكر ؟	كريمة وسكر؟	كريمة وسكر ؟
هل يوجد أي قطار سريع إلى بوسطن ؟	في أي قطار سريع لبوسطن؟	هل هناك أي قطار سريع إلى بوسطن ؟
الحجوزات في السابعة ، تحت اسم مانو .	حجوزات الساعة سبعة، بإسم مانو.	حجوزات الساعة السابعة ، باسم مانو.
أين أفضل مكان لمشاهدة المعالم ؟	وين أحسن مكان لشوفة المناظر؟	أين أفضل مكان لمشاهدة المعالم ؟
هل يمكنك أن تريني كيف أضع الغاز ؟	ممكن توريني كيف أحط الغاز؟	هل لك أن تريني كيفية وضع الغاز ؟
علىّ أن أذهب ، سأتصل بك لاحقاً .	أني لازم أروح. رح أحكي معك بعدين.	أنا يجب أن أذهب. سأحدثك فيما بعد.
لا كهرباء .	ما في كهربا.	لا توجد كهرباء.
ثلاثون دولاراً وثمانون سنتا .	ثلاثين دولار وثمانين سنت.	ثلاثين دولارا وثمانين سنتاً.
هل تعرف طبيب أسنان جيد ؟	بتعرف دكتور اسنان كويس؟	هل تعرف طبيب أسنان جيد ؟
هل من الممكن أن أمكث في غرفتي حتى الثانية مساءً ؟	ممكن أظل بغرفتي للساعة ثنتين المسا؟	هل يمكنني البقاء في غرفتي حتى الساعة الثانية مساءً ؟
إن حول غرفتي ضجيجا بالغا .	في ضجة كبيرة حوال غرفتي	هناك ضجة كبيرة حول غرفتي.
كم ستستغرق لكي تطلب ؟	قديش بدك يعني عشان تطلب؟	كم تريد أن تطلب ؟
معدتي تؤلمني بعد الوجبات .	معدتي بتالمني بعد الوجبات.	معدتي تؤلمني بعد الوجبات.
نفضل مائدة بجوار النافذة .	بنحب طاولة جنب الشباك.	نحب منضدة بجوار النافذة.
كنت على رحلة يونيتد إيرلاينز رقم ثمانية اثنان ثمانية .	كنت برحلة يونايتد إيرلاينز الرقم ثمانية اثنين ثمانية.	كنت في رحلة يونايتد إيرلاينز رقم ثمانية اثنان ثمانية.
هل لك أن ترسم لي خريطة , من فضلك ؟	ممكن ترسملي خريطة، لو سمحت؟	هل لك أن ترسم لي خريطة ، من فضلك ؟
هل بإمكاني اللمس ؟	بقدر ألمسه؟	هل يمكن أن ألمسه ؟
يصعب العثور على هذا المكان . إنه في طريق ضيق يتفرع من الطريق الرئيسي .	صعب يلتقى هالمكان. هو بدخلة بتتفرع من الشارع الرئيسي.	يصعب أن يلتقي هذا المكان. إنه في مدخل يتفرع من الشارع الرئيسي.
هلا أخذت هذه السراويل ؟	ممكن توخذ هاي البنطلونات؟	هل يمكنك أن تأخذ هذه البنطلونات ؟
حسنا . إنها تتكلف خمسة وثمانون دولارا في البريد العادي وثلاثة دولارات في التوصيل الخاص .	طيب. بتكلف خمسة وثمانين دولر بالبريد العادي وثلاث دولرات بالتوصيل الخاص.	حسنا. تبلغ خمسة وثمانين دولارا بالبريد العادي وثلاثون دولارا بالتوصيل الخاص.
إذاً يمكنني بكل ثقة أن أزكي برج مدينة سان فرانسيسكو . فهذا يعطيك فكره عن سان فرانسيسكو .	يعني بنصحك عالأكيد ب برج مدينة سان فراسيسكو. رح يعطيك لمحة عن سان فرانسيسكو.	يعني أنصحك بالتأكيد في برج مدينة سان فراسيسكو. سوف يعطيك لمحة عن سان فرانسيسكو.
لدي تقدير كبير للموسيقى الكلاسيكية .	كثير بقدر الموسيقى الكلاسيكية.	كثير من الموسيقى الكلاسيكية.
من فضلك استعمل غرفة القياس هناك .	من فضلك استخدم غرفة القياس هنيك.	من فضلك استخدم غرفة القياس هذه.
سر في نفس الاتجاه حوالي خمس دقائق ثم لف لجهة اليسار .	امشي بنفس الاتجاه حوالي خمس دقايق و بعدين ارجع على الشمال.	سر في نفس الاتجاه حوالي خمس دقائق ثم ارجع إلى الشمال.
هل أجعله يعاود الاتصال بك عندما يعود ؟	بتحب أخليه يرجع يرنلك بس يرجع؟	هل تحب أن أخبره أن يتصل بك عندما يعود ؟
من المرجح أن محبا للإبداع الفني مثلك سيستمتع اللوحات الزيتية غير التقليدية وعروض الموسيقى بالشوارع .	متوقع من محب للابداع الفني مثلك راح ينبسط باللوحات الزيتية والموسيقى وعروض الموسيقى بالشوارع.	أعتقد أن محب للإبداع الفني مثلك يستمتع باللوحات الزيتية والموسيقى وعروض الموسيقى في الشوارع.
هل رشحت لي رحلة قصيرة ؟	هل اخترتلي رحلة قصيرة؟	هل اخترت رحلة قصيرة ؟
إنها سبعة عشر ايه . اوه ، انا آسف . لقد أخطأت .	هي سبعتعشر ايه . اوه ، أني آسف . غلطت	إنها سبعة عشر إيه. أوه ، أنا آسف. لقد أخطأت.
كم المدة التي قضتها هي حتى الآن في المملكة المتحدة ؟	قديش المدة اللي عاشتها بإنجلترا؟	كم المدة التي قضتها في إنجلترا ؟
هل قرّرتَ ؟	قررت؟	هل قررت ؟
هل نذهب إلى أي مكان متحدثين مثل ذلك ؟	راح نظل نحكي هيك وين ما نروح؟	هل سنمكث هنا حتى لا نذهب ؟
سأذهب كي أسأل البواب عن الأجرة المناسبة .	رايح اسأل البواب عن الأجرة الصحيحة.	سأستفسر البواب عن الأجرة الصحيحة.
اللون البني محبب هذا العام .	اللون البني مرغوب هالسنة.	اللون البني مرغوب هذا العام.
هناك قطع في بلوزتي . أتساءل هل يمكنك أن تخيطيه لي ، من فضلك ؟	في مزع ببلوزتي. بدي اسألك اذا بتقدر تخيطلي اياه، لو سمحت؟	يوجد إزعاج في بلوزتي. أود أن أسأل عن إمكانية تخيطها لي ، من فضلك ؟
هل هذه هي آخر محطة ؟	هاظا آخر موقف؟	هل هذا هو آخر موقف ؟
هل يمكنني تركها في أي مكان من البلاد ؟	بقدر أسيبها بأي مكان بالبلد؟	هل يمكنني أن أتركها في أي مكان في البلد ؟
أريد بعض التفاح ، من فضلك .	بدي شوية تفاح، لو سمحت.	أريد بعض التفاح ، من فضلك.
أخشى أن لا يكون هنا أية دورة لتعليم الجولف .	خايف ما يكون في دورة لتعليم الجولف	أخشى ألا يكون هناك دورة لتعليم الجولف.
دعني أحول هذه المكالمة إلى المسئول .	خليني أحوّل هاي المكالمة للمسؤول.	دعني أحوّل هذه المكالمة إلى المسؤول.
هل يمكن أن تحجزوا في العرض ؟	ممكن تحجزولي بالعرض؟	هل يمكن أن تحجز لي بالعرض ؟
أنا أقيم في فندق هيلتون .	أنا قاعد بفندق الهلتون.	أنا مقيم في فندق الهلتون.
أحب هذه الخدمة بتقديم شامبانيا للتحية بعد الإقلاع . دعني أشرب فى صحتك .	بحب هاي خدمة توزيع شامبانيا للترحيب بعد ما نطير. خليني أشرب بصحتك.	أفضل خدمة توزيع شامبانيا للترحيب بعد الطيران. دعني أشرب في صحتك.
ما هو الحد الأدنى للعمر لفعل ذلك ؟	إيش أقل عمر مسموح يعمل هيك؟	ما هو أقل عمر مسموح به ذلك ؟
إلى فندقي ، من فضلك ، إن عنوان فندقي في هذه الورقة .	للفندق تبعي، لو سمحت، العنوان تبع الفندق ع هالورقة.	للفندق الخاص بي ، من فضلك ، العنوان الخاص بالفندق على هذه الورقة.
أريد لقاء السيد ويليم .	بدي أشوف الأستاذ ويليم.	أريد رؤية السيد ويليم.
النبيذ ليس باردا بشكل كافي . هل نمكنك أن تجعله أكثر برودة ؟	الواين مش بارد كفاية. ممكن تبرده اكثر؟	الوين ليس بارداً كفاية. هل يمكنك أن تبخره أكثر ؟
بكم هذا العطر ؟	بقديش هاظا العطر؟	بكم هذا العطر ؟
بالتأكيد سوف ترسلهم ، أليس كذلك ؟	أكيد راح تبعتثم، صح؟	بالتأكيد سوف تتلعثم ، أليس كذلك ؟
أسف ، هذا المكان محجوز بالفعل .	آسف، هاذ المكان محجوز فعلاً.	آسف ، هذا المكان محجوز بالفعل.
من فضلك أعطني بعض النقود الفكة .	لو سمحت أعطيني شوية فراطة.	من فضلك أعطني بعض الفكة.
لا أعرف شيئاً عن هذا الأمر .	ما بعرف إشي عن هالشغلة.	لا أعرف شيئاً عن هذا.
حفلتك مقامة الآن . تفضل .	حفلتك مبلشة هسا. تفظل.	حفلتك بدأت للتو. تفضل.
أخطط للبقاء لمدة اثنا عشر يوماً .	بخطط أظل اثنعشر يوم.	أخطط للبقاء اثني عشر يوماً.
يوجد الكثير من السائحين بالقرب من المبنى ، ويبدو أنهم تجمعوا لإلقاء نظرة على ما يحدث .	في كتير سواح حوالين البناية، شكلهم متجمعين عشان يشوفوا شو اللي بصير.	هناك الكثير من السائحين حول المبنى ، يبدو أنهم يجتمعون لرؤية ما يحدث.
هل لك أن تقدر التكلفة قبل أن تبدأ العمل فيها ؟	ممكن تقدر قديش بكلف قبل ما تبدا شغل فيه؟	هل يمكنك أن تقدر التكلفة قبل أن تبدأ العمل فيه ؟
نعم . تم نقل أمتعة شخص آخر إلى غرفتي تواً . من فضلك ، هل من الممكن أن تقوم بفحصها ؟	اه، في شناتي لحدا ثاني وصلت غرفتي هسا.لو سمحت، ممكن تشوفها؟	نعم ، حقائب لشخص آخر وصلت إلى غرفتي الآن. من فضلك هل يمكنك أن تراها ؟
أريد أن أحصل على تعويض لذلك .	أنا بدي اوخد تعويض عن هاظ.	أنا أريد الحصول على تعويض عن هذا.
بالتأكيد , كن على راحتك .	أكيد، كون على طبيعتك	بالتأكيد. كن على طبيعتك.
إن ثمة خطأ ما في بطاقة المفتاح هذه ، أعطني غيره ، من فضلك .	فيها غلطة شكلها بالكارت هاي، عطني وحدة ثانية، الله يخليك.	هناك خطأ ما في هذه الكارتة ، أعطني واحدة أخرى ، من فضلك.
من فضلك اتصل لي برقم ثلاثة اثنان ستة اثنان تسعة واحد ثمانية .	لو سمحت، رنلي على الرقم ثلاثة اثنين ستة اثنين تسعة واحد ثمانية.	من فضلك اتصل بالرقم ثلاثة اثنان ستة اثنان تسعة واحد ثمانية.
أين مدخل مترو الأنفاق ؟	وين دخلة المترو؟	أين مدخل المترو ؟
معذرة . ولكني أريد تسليم تقرير السرقة .	معلش، بس بدي أسلم تقرير السرقة.	معذرة ، لكن أريد تسليم تقرير السرقة.
هذا المقاس ، الذي تسميه المقاس العادي ، سوف تجده هنا .	هاذ الحجم ، اللي بتسميه حجم عادي، راح تلاقيه هون .	هذا الحجم ، الذي تسميه حجم عادي ، ستجده هنا.
إنه رديء الصنع .	هو مش صنوع منيح.	إنه ليس مصنوعا جيداً.
هل يمكن أن تخبرني عن ساعات العمل ؟	ممكن تحكيلي عن ساعات الشغل؟	هل لك أن تخبرني عن ساعات العمل ؟
اعطني شهادة طبية , من فضلك .	عطيني وصفة طبية ، لو سمحت .	أعطني وصفة طبية ، من فضلك.
ليس معي فكة صغيرة .	ما معي فراطة.	ليس معي فكة.
هل يمكن أن أرى هذا ؟	ممكن أشوف هاظا؟	هل يمكن أن أرى هذا ؟
ليس لدى أي شئ لكي أعلنه .	ما عندي أي اشي عشان أعلنه.	ليس لدي أي شيء لأعلنه.
أعتقد أنني تركت كاميرتي وغادرت عندما كنت أتناول العشاء هنا الليلة الماضية .	بظن اني تركت كميرتي و روحت لما كنت اكل هون امبارح عالعشا.	أعتقد أنني تركت كاميرتي وذهبت لتناول العشاء أمس.
دعنا نجتمع لنبحث الأمر أكثر .	خلينا نلتقي عشان اناقش هاظ الموضوع أكثر.	دعنا نلتقي لمناقشة هذا الأمر أكثر.
هيه ، هذا فستان جميل حقا .	مرحبا ، هاذا فعلا فسطان حلو.	مرحباً ، هذا فستان جميل.
من فضلك كن صديقي بالمراسلة .	من فضلك, كون صاحبي عالتواصل.	من فضلك, كن صديق لي على الاتصال.
أعطني خمسين ، من فضلك .	اعطيني خمسين ، إذا سمحت.	اعطني خمسين ، من فضلك.
ما هذا المكان الذي نمر به الآن ؟	شو هالمكان اللي بنمر فيه هسا؟	ما هذا المكان الذي نمر فيه الآن ؟
هل لي في استعارة بعض البياضات ؟	ممكن أستعير شرارشف؟	هل يمكن أن استعارة شرارفا ؟
أوه , يبدو كأنه قرعة .	أوه، شكله قرعة .	أوه ، يبدو أنها قرعة.
اشعر كأن هناك تحديق في . هل من النادر رؤية شخص ياباني ؟	حاسك بتسرح فيه. لهاي الدرجة قليل تشوف واحد ياباني؟	أشعر بأنك تستمتع به. إلى هذه الدرجة هل من النادر أن ترى واحداً يابانياً ؟
سنبعث لك بالبريد عشرين عينة إضافية .	رح نبعتلك عالبريد عشرين عينة زيادة.	سنرسل لك بالبريد عشرين عينة إضافية.
إن الرصيف رقم خمسة يقع هناك .	الرصيف رقم خمسة موجود هناك.	الرصيف رقم خمسة هناك.
أين يوجد مكان لطيف لقضاء نزهة ليوم واحد ؟	وين بلاقي مكان لطيف أظل فيه رحلة ليوم واحد؟	أين يمكنني أن أجد مكاناً لطيفاً لأقضي فيه رحلة ليوم واحد ؟
يا سيد كاواي لدينا مائدة لك الآن . تفضل من هنا .	يا أستاذ كاواي، عنا طاولة الك حاليا. تعال من هون.	يا سيد كاواي ، لدينا مائدة لك الآن. تعال من هنا.
لا توجد مشكلة . إذا حضرت في الخامس من سبتمبر ، فسيكون بإمكانك الاستمتاع بعرض فيلم علمي لأن عندنا يوماً خاصاً مفتوحاً أول يوم جمعة من كل شهر .	ما في مشكلة. اذا اجيت بخمسة تسعة ، بتقدر تستمتع بالفلم العلمي لأنه احنا عنا يوم مميز مفتوح بأول جمعة من كل شهر.	لا بأس. إذا أتيت في الخامس من سبتمبر ، يمكنك الاستمتاع بالفلم العلمي لأننا لدينا يوم مميز في الأول من سبتمبر.
هل بإمكاني الحصول على طبق آخر مثل هذا ؟	بقدر آخذ صحن ثاني مثل هاذ؟	هل يمكنني الحصول على طبق آخر مثل هذا ؟
لا تهتم . على أي حال ، خذني من فضلك إلى مركز الحي الصيني . سأحاول أن أجده بنفسي .	ما تشيل هم. يلا، خذني لو سمحت لمركز الحي الصيني. راح احاول ادور الجهة وحدي.	لا تقلق. هيا ، خذني من فضلك إلى مركز الحي الصيني. سوف أحاول أن أبحث عن الجهة بنفسي.
أهه ، هيا . دولارين فقط .	اها، يلا. بس دولارين.	أجل ، هيا. فقط دولاران.
سندويتشان برجر بالجبن ، من فضلك .	اثنين برجر بالجبنة، لو سمحت.	اثنان برجر بالجبن ، من فضلك.
أرغب في كريم مسائي للبشرة .	بدي كريم ليلي للبشرة.	أريد كريم ليلي للبشرة.
متى سنقلع ؟	أميت راح نقلع؟	متى سنقلع ؟
هذا طيب ، على ما يبدو .	هاذ طيب ، من شكله.	هذا طيب ، من شكله.
حسنا , الوقت متأخر إلى حد ما . أعتقد أنني يجب على أن أغادر الآن . شكرا جزيلا لك على الأمسية الرائعة .	ماشي, الوقت صار متأخر شوي. بظن انو لازم اروّح هسا. كتير شكرا على الليلة الممتعة.	حسنا, الوقت متأخر قليلاً. أعتقد أنه يجب علىّ أن أغادر الآن. شكراً على الليلة الممتعة.
لقد سقطت من على درجات السلم .	وقعت من على درج السلم	سقطت من على درج السلم.
هذه السن في المقدمة تؤلمني .	هالسنة في الامام بتوجعني.	هذه السنة في الأمام تؤلمني.
من أي نوع من الجلد الصناعي صُنعت حقيبة السفر هذه ؟	شو نوع الجلد الاصطناعي المصنوع منه شنطة السفر هاي؟	ما نوع الجلد الاصطناعي المصنوع منه حقيبة السفر هذه ؟
أين نشأت سمكات الفراش هذه ؟	من وين جاية سمكات الفراش هاي؟	من أين تأتي سمكات الفراش هذه ؟
سأخطط لإرسال فواتير حاجياتي اليومية ، لذا من فضلك أخبرني العنوان و اسم الشخص المسئول من فضلك .	رح أبعث فواتير حاجاتي اليومية، عشان هيك لو سمحت أعطيني عنوان واسم الشخص المسؤول.	سأرسل فواتير حاجاتي اليومية ، لذا من فضلك أعطني عنوان الشخص المسؤول.
أريد نسخة من تقرير السرقة .	بدي نسخة من تقرير السرقة.	أريد نسخة من تقرير السرقة.
أريد السفر من شنغهاي إلى هاواي بالباخرة .	بدي أروح من شنغهاي لهاواي عالسفينة.	أريد الذهاب من شنغهاي إلى هاواي على متن السفينة.
جريدة باللغة الإنجليزية ، لطفاً .	جريدة بالانجليزي، لو سمحت.	جريدة بالإنجليزية ، من فضلك.
هل هناك سيارة ليموزين ؟	في سيارة ليموزين؟	هل توجد سيارة ليموزين ؟
لا أريد واحدة ضخمة .	ما بدي وحدة دفشة.	لا أريد واحدة مدخنة.
أريد فندقاً آمنا يقدم إفطاراً جيدا ، من فضلك ؟	بدي فندق آمن ، بقدم فطور كويس ، لو سمحت ؟	أريد فندق آمن ، يقدم إفطاراً جيداً ، من فضلك ؟
أربعة وعشرين دولاراً . هل تريد المزيد ؟	أربعة وعشرين دولار. بدك كمان؟	أربعة وعشرون دولاراً. هل تريد المزيد ؟
وقعت منى الشوكة . من فضلك أحضر واحدة أخرى .	وقعت مني الشوكة. لو سمحت جبلي وحدة ثانية.	سقطت مني شوكة. من فضلك أحضر واحدة أخرى لي.
لاحظ الفجوة ، لاحظ الفجوة ، ثم قرب الأبواب ، من فضلك .	لاحظ الفتحة، لاحظ الفتحة ، بعدين قرب الابواب، لو سمحت.	انظر إلى الفتحة ، لاحظ الفتحة ، ثم اقترب من الأبواب ، من فضلك.
من فضلك ساعدني أعثر على مرشد يتحدث اليابانية .	لو سمحت ساعدني ألاقي دليل سياحي بحكي ياباني.	من فضلك ساعدني في العثور على مرشد يتحدث اليابانية.
ماذا عن هذه النماذج البلاستيكة ؟	شو رأيك بموديلات البلاستك هاي؟	ما رأيك في موديلات البلاستك هذه ؟
دعونا نحتفل ، هكذا قال وآخذني إلى بار . وقال إنه سيُجري مكالمة هاتفية وغادر ولم يعد أبداً وتحملت أنا وحدي عبء فاتورة ضخمة .	"خلينا تحتفل" هيك قال وأخذني على البار. حكى انه رايح يعمل مكالمة وراح وما رجع إجى أبداً وأنا تورطت بفاتورة كبيرة.	دعنا نحتفل هكذا قال وأخذني إلى البار. قال إنه ذاهب لإجراء مكالمة وسيعود ولم يأت أبداً وأنا تورطت في فاتورة كبيرة.
أرغب في خلع أسناني .	أنا حاب أقلع سناني.	أنا أود أن أقمع أسناني.
أريد منبه ، من فضلك .	بدي منبه، لو سمحت.	أريد منبه ، من فضلك.
ما توقيت إجراءات مغادرة الفندق ؟	متى منقدر نعمل الاجراءات حتى نطلع من الفندق؟	متى يمكننا أن نقوم بالإجراءات حتى نغادر الفندق ؟
أريد أن أحصل على استراحة .	بدي أوخذ بريك.	أريد أخذ فترة راحة.
هذه الغرفة اثنان صفر واحد . أريد أن أطلب إفطار الغد .	هاي الغرفة رقم اثنين صفر واحد. بدي أطلب فطور بكرا.	هذه غرفة رقم اثنان صفر واحد. أريد أن أطلب إفطار غداً.
هل هذا مصنوع من القطن ؟	هاذ مصنوع من القطن؟	هل هذا مصنوع من القطن ؟
ما هو مقدار الرسوم للوزن الزائد ؟	قديش الدفع على الوزن الزايد؟	كم الدفع للوزن الزائد ؟
لدي معداتي الخاصة .	عندي أدواتي الخاصة.	لدي أدوات خاصة.
في غرفة انتظار بالمحطة .	في غرفة انتظار بالمحطة.	توجد غرفة انتظار في المحطة.
كيف أستطيع مساعدتك ؟	كيف بقدر اساعدك ؟	كيف يمكنني مساعدتك ؟
ادخل . من فضلك ضعها على المائدة هناك .	أدخل. لو سمحت حطها على الطاولة هنيك.	أدخل. من فضلك ضعها على المائدة هنا.
حسناً . سأتأكد أن حقائبك ستكون هنا .	طيب . راح أتأكد إنه الشناتي رح تكون هون.	حسناً. سوف أتأكد أن الحقائب ستكون هنا.
سنأتي في السابعة .	رح نيجي الساعة سبعة.	سنأتي في السابعة.
حقاً . اليوم هو الأحد ، والأحد هو أسوء الأيام .	فعلاً. اليوم الأحد، والأحد أسوأ الأيام.	حقاً. اليوم الأحد ، والأحد أسوأ الأيام.
إما أن تصلحها أو تستبدلها ، من فضلك .	يا تصلحها يا تبدلها، لو سمحت.	يا تصلحها يا تبدلها ، من فضلك.
ربما أعطيك إجابة أفضل من تلك بعد عرضين .	يمكن أعطيك جواب أحسن من هاذ بعد ما أشوفه مرتين.	ربما أعطيك جواً أفضل من هذا بعد أن أراه مرتين.
إن ارتفاعه ألفان وأربعمائة متر .	إنو ارتفاعه ألفين وأربعمية متر.	إنه يبلغ ارتفاعه ألفين وأربعمية متر.
هل يمكن أن أستعيد متعلقات ؟	ممكن أرجع متعلقاتي؟	هل يمكن أن أرجع متعلقاتي ؟
هل بإمكاني إجراء طلبية ؟	بقدر اطلب؟	هل يمكنني أن أطلب ؟
إنه خطئي . ليس خطأك .	هاي غلطتي. مش غلطتك.	هذه غلطتي. ليست خطئك.
لا يوجد أي منها .	ما في منهم.	لا يوجد منهم.
أريد غرفة بمنظر جميل .	بدي غرفة مع إطلالة حلوة.	أريد غرفة تطل على منظر جميل.
أنا ياباني .	أني ياباني.	أنا ياباني.
هل لديكم دبابيس زينة ذات تصميمات رائعة ؟	عندك بروشات شكلها حلو؟	هل لديك أي بروشات جميلة ؟
يبدوا أنني غير قادر على الحصول على الماء الساخن .	شكله مش قادر يجيب ميّة ساخنة.	يبدو أنه لا يستطيع الحصول على مياه ساخنة.
هلا وقفت معي لالتقاط صورة ؟	بتقدر توقف معي شوي عشان نصور صورة؟	هل يمكنك أن تتوقف معي لحظة لكي نلتقط صورة ؟
لا أعتقد أن ذلك يناسبني فجلدي جاف إلى حد ما .	ما بعتقد انه هاد بلبقلي، جلدي ناشف كثير.	لا أعتقد أن هذا بلبقلي ، جلدي جاف جداً.
أكون ممتنا جدا لو أخذتني إلى الشاطئ .	راح أكون كثير ممنون لو توخذني لعند الشط.	سأكون ممتناً لو تأخذني إلى الشاطئ.
هل يمكنني الحصول على تذكرتين درجة ثانية لشيكاغوا , من فضلك ؟	ممكن أحجز تذكرتين لشيكاغو من الدرجة الثانية، لو سمحت؟	هل يمكنني حجز تذكرتين إلى شيكاغو من الدرجة الثانية ، من فضلك ؟
أجل ، أنا . لقد كانوا يعيشون بجواري في كاليفورنيا لكنهم انتقلوا إلى فلوريدا منذ عامين . ماذا عنك ؟ هل تسافر بمفردك ؟	أيوه، أنا. كانوا عايشين بحدي بكاليفورنيا بس انتقلوا على فلوريدا من سنتين. شو بالنسبة الك؟ بتسافر لحالك؟	نعم ، أنا. كانوا يعيشون في أحد أحياء كاليفورنيا ولكن انتقلوا إلى فلوريدا منذ عامين. ماذا عنك ؟ هل تسافر بمفردك ؟
أنا من طوكيو .	أني من طوكيو.	أنا من طوكيو.
أي منتجات صوفية أخرى ؟	في منتجات صوف ثانية؟	هل توجد أي منتجات صوف أخرى ؟
هل من الممكن أن تخبرنا كيف تقيم هذه الخطة ؟	ممكن تحكيلنا كيف بتعمل هاي الخطة ؟	هل لك أن تخبرنا كيف تقوم بتنفيذ هذه الخطة ؟
مساء الخير . أهلا .	مسا الخير. أهلين.	مساء الخير. أهلاً.
اخرج من ذلك الباب ، وانتظر عند المحطة رقم ستة .	طلع من هاي الباب، و انطر عند المحطة رقم ستة.	غادر من هذا الباب ، وانتظر عند المحطة رقم ستة.
سبعاً ، من فضلك .	سبعة، لو سمحت.	سبعة ، من فضلك.
مهزوز ، وليس مضروب .	محرك، مش مخفوق.	محرك ، غير مخفوق.
ثلاثة أيام .	ثلاث أيام.	ثلاثة أيام.
تريد أن تشتري ثوبا .	هي بدها تشتري فسطان.	إنها تريد شراء فستان.
لا ، ليس بعد ، هناك الكثير نختار فيه .	لا، بعده ، في كثير عشان تنقي منه	لا ، بعد ، هناك الكثير من الماء لكي تنقي منه.
سر في خط مستقيم على طول النهر حوالي نصف ميل . ستصل للمتنزه .	إمشي دغري على طول النهر حوالي نص ميل. بتصل المنتزه.	سر في الاتجاه المستقيم على طول النهر حوالي نصف ميل. إنها تصل إلى المنتزه.
أسف أنني بحاجة إلى أن أطلع على أي مستند لتحديد الهوية .	أسف أني بحاجة إني أشوف اثبات هوية.	آسف أنني بحاجة إلى الحصول على إثبات هوية.
كن حذراً ، السقف منخفض .	انتبه ، السقف واطي.	انتبه ، إن السقف مرتفع.
كم تتقاضى لتطبيع صور الفيلم ؟	قديش بتوخذ عشان تطبع صور الفلم؟	كم تتقاضى لطباعة صور الفيلم ؟
هل يدخل هذا في حدود المعفي من الضرائب ؟	هاظ معفي من الضرايب؟	هل هذا معفى من الضرائب ؟
غرفة مفردة بدون دش من فضلك .	غرفة مفردة بدون دش لو سمحت .	غرفة مفردة بدون دش من فضلك.
هل يمكن أن تدلّني أين أجد القنصلية اليابانية ؟	ممكن تحكيلي وين بقدر ألاقي القنصلية اليابانية؟	هل لك أن تخبرني أين يمكنني أن أجد القنصلية اليابانية ؟
من فضلك ضعها في قمع .	لو سمحت حطها ببوري.	من فضلك ضعها في بورني.
نصف أوقية من شانيل رقم خمسة من فضلك .	نص أوقية من شانيل رقم خمسة، لو سمحت.	نصف أوقية من شانيل رقم خمسة ، من فضلك.
شخصان .	شخصين.	شخصين.
هل تعرف ما إذا كان هناك أي فنادق رخيصة الأسعار ؟	بتعرف اذا في أي فنادق رخيصة؟	هل تعرف إذا كانت هناك أي فنادق رخيصة ؟
أريد أن أقدم طلباً للحصول على إصدار جديد .	بدي أقدم طلب مشان اخد إصدار جديد.	أود أن أقدم طلب للحصول على إصدار جديد.
أريد بزة .	بدي سترة.	أريد سترة.
هذا مكلف نوعا ما .	هاي بتكلف شوي.	هذه تكلف قليلاً.
لقد طلبت لحما لا سمكا . هل يمكنك تغيير هذا ؟	طلبت لحم مش سمك. ممكن تغير هاي؟	لقد طلبت لحم غير سمك. هل يمكنك أن تغير هذا ؟
عذراً . هل يوجد محل كتب قريب من هنا ؟	عفواً . في مكتبة بتبيع كتب قريب من هون ؟	معذرة. هل توجد مكتبة تبيع الكتب بالقرب من هنا ؟
حينئذ سنأخذها .	بهالوقت رح نوخذها.	في هذا الوقت سنأخذها.
إنه بعيد جداً . يحسن بك أن تأخذ سيارة أجرة .	هو بعيد كتير. فضل أكيد تاخذ تكسي.	إنه بعيد جداً. أفضل بالتأكيد أن تأخذ سيارة أجرة.
في أي وقت نبدأ ؟	على أي ساعة راح نبلش؟	على أي وقت نبدأ ؟
حسناً . لقد تم التأكيد . هل يمكننا أن نأخذ رقم تليفونك في حالة الحاجة إلى الاتصال بك ؟	ماشي، اتأكدت . بنقدر نوخذ رقمك تلفونك في حال احتجنا نتصل فيك؟	حسناً ، لقد تأكدت. هل يمكننا الحصول على رقم هاتفك في حالة احتياجنا للاتصال بك ؟
حسنا . خصم خمسة في المائة . هل يوافقك لك ؟	ماشي ، خصم خمسة بالمية. بمشي معك؟	حسناً ، خصم خمسة بالمائة. هل أنت موافق ؟
الآن ، مكالمتك ردت . تفضل من فضلك .	حاليا، مكالمتك رجعت. تفضل لو سمحت.	حاليا ، مكالمتك عادت. تفضل من فضلك.
أوه ، أهي كذلك ؟ كيف تفضلها ؟	أووه، هي هيك؟ كيف بتحبها؟	أوه ، إنها كذلك ؟ كيف تحبها ؟
أنا فقدت أثر بريد مسجّل .	ضيعت أثر رسالة مسجلة.	فقدت أثر رسالة مسجلة.
لا أشعر بحالة جيدة . هل ترشدني إلى طبيب ؟	ما بحس حالي ملبح. ممكن ادلني على دكتور؟	لا أشعر بالبرد. هل يمكن أن تأخذني إلى طبيب ؟
هل أنت ملم بجغرافيا اليابان ؟	إنت ملم بتظاريس اليابان؟	هل أنت ملم بتضاريس اليابان ؟
لا أستطيع رؤية الشاشة جيداً من هنا ، هل يمكنني تبديل المقاعد لبعض الوقت ؟	أنا مش قادر أشوف الشاشة مليح من هون. ممكن نبدل المقاعد شوي؟	أنا لا أستطيع رؤية الشاشة جيداً من هنا. هل يمكن أن نغير المقاعد قليلاً ؟
سعر الغرفة هو ستة آلاف ين في الليلة .	سعر الغرفة ست آلاف ين لليلة.	سعر الغرفة ستة آلاف ين لليلة.
أعتقد أن سيارتي تستحق حوالي خمسة آلاف دولارا .	أنا بتوقع سيارتي بتسوى حوالي خمس الآف دولار.	أنا أعتقد أن سيارتي تساوي حوالي خمسة آلاف دولار.
أين حديقة الحيوان ؟	وين حديقة الحيوانات؟	أين حديقة الحيوان ؟
هي تريد بيرة .	هي بدها بيرا .	إنها تحتاج إلى بيرة.
هل هذه الحقيبة مناسبة لكل حالات الطقس ؟	هاي الشنتة بتناسب كل حالات الجو؟	هل هذه الحقيبة تناسب كل حالات الجو ؟
أفضل شيء هو اسطوانة مصغرة .	أحسن اشي هو سي دي صغير.	أفضل شيء هو سي دي صغير.
فهمت ، في هذه الحالة ليس علىّ أن أدفع أجر التبديلات ، أليس كذلك ؟	فهمت، بهاي الحالة ما عليي أدفع فلوس التبديلات، مش هيك؟	أفهم ، في هذه الحالة لا يتعين علىّ دفع رسوم التبديلات ، أليس كذلك ؟
هل يمكنك أن تريني حجماً أكبر بقليل ؟	ممكن توريني سايز اكبر شوي؟	هل لك أن تريني سايز أكبر قليلاً ؟
هل يمكنك بطريقة ما أن تصف لي مرضك بالإنجليزية ؟	بتقدر بأي طريقة تشرحلي مرضك بالإنجليزي؟	هل يمكنك بأي وسيلة أن تشرح مرضك بالإنجليزية ؟
انتقلنا إلى هذا المنزل منذ عام .	رحلنا لهاظ البيت من سنة.	لقد رحلنا إلى هذا البيت منذ عام.
معذرة ، هل يسعني أن أتوجه إليك بسؤال ؟	معلش، بقدر أوجهلك سؤال؟	معذرة. هل يمكن أن أسأل سؤالاً ؟
هذا سعر مرتفع ، أليس كذلك ؟	هاظا سعره غالي، صح؟	هذا سعره مرتفع ، أليس كذلك ؟
نعم ، ولكن تأكد أن تذكرتك معك .	ايوه، بس تأكد إنه تذكرتك معك.	نعم ، ولكن تأكد أن تذكرتك معك.
ما رأيك في موضوع التحرش الجنسي في مكان العمل ؟	شو رأيك بالتحرشات الجنسية اللي بتصير بمكان الشغل؟	ما رأيك في التحرش الجنسي في مكان العمل ؟
أريد تذكرتين ذهاب وعودة إلى أكسفورد .	بدي تذكرتين روحة رجعة على أكسفورد.	أريد تذكرتين ذهاب وعودة إلى أكسفورد.
هل ستذهب إلى المدرسة هنا ؟	رح تروح عالمدرسة هون؟	هل ستذهب إلى المدرسة هنا ؟
أود بعضاً من فيلم رقم ايه إس ايه لهذه الكاميرا ، من فضلك .	بدي فيلم رقم ايه إس ايه لهاي الكميرا، لو سمحت.	أريد فيلم رقم إيه إس إيه لهذه الكاميرا ، من فضلك.
أصبت بسحجة .	أني انشخطت.	أنا انشطرت.
أريد تسجيل أمتعتي .	بدي أسجل شنطي.	أريد أن أسجل حقائبي.
أريد أن أرى ذاك الذي في نافذة العرض ، من فضلك .	بدي أشوف هاذ الموجود بالواجهة، لو سمحت.	أريد أن أرى هذا الموجود في الواجهة ، من فضلك.
ما هي المحتويات ؟	شو المكونات؟	ما هي المكونات ؟
لقد تعطلت سيارتي . من فضلك احضر لتأخذها .	سيارتي خربت. تعال خذها لو سمحت.	سيارتي تعطلت. هيا خذها من فضلك.
ما النمط الذي في مخيلتك ؟	شو النمط اللي بخيالك؟	ما النمط الذي تفضله ؟
كيف تسير الأمور ؟	كيف ماشية الأمور؟	كيف تسير الأمور ؟
ألا تسأله أن يتصل بي ؟	بتقدر تحكيله يتصل فيّ؟	هل يمكنك أن تتصل بي ؟
ما الغرض منها ؟	شو الهدف منها؟	ما الغرض منها ؟
كيف يربي الآباء اليابانيون أولادهم ؟ هل هم صارمون مع أطفالهم ؟	كيف بيربو الآباء اليابانيين ولادهم؟ همة شديدين مع عيالهم؟	كيف يربي الآباء اليابانيون أطفالهم ؟ هل هم شديدون مع أطفالهم ؟
هلا ضغطت على زر مصراع النافذة ؟	ممكن تكبس كبسة الشباك؟	هل يمكنك أن تضغط كبس شباك ؟
أيمكنني أن أذهب هناك بمترو الأنفاق ؟	بقدر أروح هناك بالمترو؟	هل يمكنني الذهاب إلى هناك بالمترو ؟
دعنا نشاهد التلفزيون . فيها مباراة بيسبول .	خلينا نتفرج على التلفزيون. في مباراة بيسبول.	دعنا نشاهد التلفاز. هناك مباراة بيسبول.
حسناً . خذ هذا الاتجاه . من فضلك ، سأوصلك إلى غرفتك .	ماشي، خذ هاي الطريقة. لو سمحت، رح أوصلك لغرفتك.	حسناً ، خذ هذه الطريقة. من فضلك ، سأوصلك إلى غرفتك.
أريد تمويج متقارب لشعري ، من فضلك .	بدي أعمل شعري كيرلي ، لو سمحت.	أريد أن أقوم بعمل شعري كيرلي ، من فضلك.
نريد مائدة في الشرفة .	بدنا طاولة على البرندة.	نريد منضدة على البرندة.
معدتي ثقيلة .	معدتي كبيرة.	معدتي كبيرة.
أعد ذلك , من فضلك .	عيدها، لو سمحت.	أعيدها ، من فضلك.
سآخذ صورة لجاك دانيلز .	راح آخذ صورة لجاك دانيلز.	سآخذ صورة لجاك دانيلز.
هل لديكم أطباق ذات سعرات حرارية منخفضة ؟ فأنا أتبع نظاما غذائياً حالياً .	عندكو وجبات قليلة الكالوريز ؟ أنا ماشية بدايت هالأيام.	هل لديكم وجبات قليلة الكالوريز ؟ أنا في عجلة من أمري الآن.
ما هي الفوارق بين هذه الفنادق ؟	شو الفرق بين هاي الفنادق؟	ما هو الفارق بين هذه الفنادق ؟
لم أقم بالحجز .	ما عملت حجز.	لم أقم بعمل حجز.
هل لديك أية فكة لعداد الانتظار ؟	عندك عملة للبارك ميتر؟	هل لديك عملة للبارك ميتر ؟
أيهما تفضل , داكن أم فاتح ؟	شو بتحب أكثر, غامق أو فاتح؟	أيهما تفضل, داكن أم فاتح ؟
حسناً سيدي . وما الحلو الذي تريد أن تختم به الطعام ؟	طيب يا استاذي.. شو الحلو اللي بدك تختم فيه الأكل ؟	حسناً يا سيدي. ما هو الحلو الذي تود أن تختم به الطعام ؟
إنني أسجل لخروجي من الفندق . هلا أرسلت خادماً إلى أعلى ؟	أني بعمل تشيك اوت. ممكن تودي عامل لفوق؟	أنا أقوم بعمل تشيك أوت. هل يمكنك أن ترسل عامل إلى أعلى ؟
كيف يمكنني الذهاب إلى ديزني لاند ؟	شلون بقدر أروح على ديزني لاند؟	كيف يمكنني الذهاب إلى ديزني لاند ؟
الآن ، هذه اللوحة خاصة جداً . رسمها تسوروتارو كاتاأوكا . إنه معروف بأنه فنان عالمي .	هسا، هاي اللوحة كثير مميزة. رسمها تسوروتارو كاتاأوكا. معروف هاذ فنان عالمي.	الآن ، هذه اللوحة رائعة. رسمها تسوروتارو كاتاأوكا. معروف هذا فنان عالمي.
هذه المظلة يمكن استخدامها كعصا للسير .	هاي الشمسية بقدر استخدمها كعصاية.	هذه الشمسية يمكن استخدامها كعاطفة.
لأن الصيف في اليابان عادة ما يكون شديد الحرارة ، ولم يكن لدينا تكييف هواء قديماً .	لأنه الصيف باليابان عادة بكون حامي كثير، وما كان عندنا مكيف هوا زمان.	لأن الصيف في اليابان عادة يكون حار جداً ، ولم يكن لدينا مكيف هواء منذ زمن طويل.
الشيء نفسه لي ، من فضلك .	ونفس الشي إلي ، لو سمحت.	نفس الشيء لي ، من فضلك.
يوم الصحة الرياضية هو يوم العاشر من أكتوبر وهو إجازة قومية الغرض منها تحسين صحة المواطنين .	يوم الصحة الرياضية بعشرة عشرة بكون عطلة وطنية عملوه عشان يرفعوا مستوى الصحة عند الناس.	يوم الصحة الرياضية في العاشر من أكتوبر هو عطلة وطنية تم تنظيمها لرفع مستوى الصحة لدى الناس.
هل من الممكن أن تنظف المنضدة من فضلك ؟	ممكن تنظف الطاولة، لو سمحت؟	هل يمكنك تنظيف المائدة ، من فضلك ؟
يوجد عصير أناناس وبرتقال وطماطم .	في عصير أناناس و برتقال و بندورة.	يوجد عصير أناناس برتقال وبصلورة.
أود الإقامة بهذه الغرفة ليلة واحدة أخرى .	بدي أظل بهاي الغرفة ليلة ثانية.	أريد أن أبقى في هذه الغرفة ليلة أخرى.
ثمانية دولارات . وهنا تأتي واحدة حالا .	ثمن دولرات. وهون بتيجي وحدة هسا.	ثمن دولارات. وسوف تأتي واحدة الآن.
هذا حسن بالنسبة لي . في الواقع أحب أن أدخن .	هاذ تمام بالنسبة إلي . بصراحة أني بحب أدخن.	هذا حسن بالنسبة لي. أنا أحب التدخين.
المكان كان على كرسي في البهو .	المكان كان عكرسي باللوبي.	المكان كان في المقعد في اللوبي.
أشعر بصداع خفيف .	حاس بصداع خفيف.	أشعر بصداع خفيف.
ألو ، اسمي أودا . عندي حجز الليلة ، لكن سوف أتأخر في القدوم . لهذا من فضلك اتركوا لي الحجز .	مرحبا، اسمي أودا. عندي حجز هالليلة، بس راح يتأخر وصولي. يرجـى خليكو الحجز لي.	مرحباً ، اسمي أودا. لدي حجز لهذه الليلة ، ولكن سيتأخر وصولي. رجاءً احتفظوا بالحجز لي.
أين قسم السفر ؟	وين قسم السفر؟	أين قسم السفر ؟
هل لديك أي صورة لبطاقة هوية ؟	عندك اي صورة للهوية؟	هل لديك أي صورة للهوية ؟
هل لك أن تعطيني إشارة بالضوء عندما تكون فيها ؟	بتقدر تعطيني إشارة بالضو لما تكون فيها؟	هل يمكن أن تعطيني إشارة بالضو عندما تكون فيها ؟
أريد فحص هذه الحقائب المتجه إلى طوكيو , من فضلك .	بدي اتفقد هالشناتي اللي رايحة لطوكيو، لو سمحت.	أود أن أتفقد هذه الحقائب المتجهة إلى طوكيو ، من فضلك.
ثمة شئ خطأ في آلة التهوية هذه .	في اشي غلط بالمروحة هاذ.	يوجد شيء خطأ في هذه الرحابة.
منذ هذا الصباح .	من الصبح.	من الصباح.
من فضلك قس حجم حذائي .	لو سمحت قيس حجم كندرتي.	من فضلك قيس مقاس كندرتي.
أوافق . إنه أحد الأماكن المفضلة لي .	موافق. هاذ واحد من احلا الاماكن عندي.	موافق. هذا أحد أفضل الأماكن عندي.
لابد أن تكون هادئة .	لازم تكوني هادية.	عليك أن تكوني هادئة.
أريد مطفأة سجائر .	بدي منطفة سجاير.	أريد منشفة سجائر.
أود أن أتتناول طبقا مثل هذا .	بدي أوكل صحن زي هاظ.	أريد تناول طبق مثل هذا.
أين توجد أقرب مغسلة ؟	وين اقرب مغسلة؟	أين أقرب مغسلة ؟
هل لي بجدول مواعيد ؟	أعطيني جدول المواعيد؟	أعطني جدول المواعيد ؟
من فضلك اعطني هذه .	لو سمحت اعطيني هاي.	من فضلك أعطني هذه.
هل يمكن أن أذهب لمشاهدة المعالم أثناء رسو السفينة في الميناء ؟	بقدر أروح اشوف المناظر لما السفينة تكون راسية بالمينا؟	هل يمكنني أن أذهب لرؤية المناظر عندما تكون السفينة راسية فيمينا ؟
هل يوجد مكان يقبل تنظيف الملابس في أيام الآحاد ؟	في أي مكان بقبل طلبات الغسيل كل يوم أحد؟	هل يوجد أي مكان يقبل طلبات الغسيل كل يوم أحد ؟
هل توجد خدمة نقل بالحافلات إلى متحف فورد ؟	في خدمة باصات بتروح على متحف فورد؟	هل توجد خدمة حافلات تذهب إلى متحف فورد ؟
أنا من النرويج .	أني من النرويج.	أنا من النرويج.
عشرة طوابع من فضلك .	عشر طوابع لو سمحت.	عشرة طوابع من فضلك.
هل يمكنك أن تجر سيارتي ؟	ممكن تجرب سيارتي؟	هل يمكنك أن تجرب سيارتي ؟
إنه سمك ثعبان مشوي مع مرقة خاصة فوق سلطانية من الأرز .	هاذ سمك الانقليس مع صلصة خاصة محطوطة فوق سلطانية الرز.	هذا سمك الإنقليس مع صلصة خاصة موضوعة فوق سلطانية الأرز.
هل يمكنني إعادتها في مدينة مختلفة ؟	بقدر أرجعها بمدينة ثانية؟	هل يمكنني أن أرجعها إلى مدينة أخرى ؟
عندي الدواء الخاص بي .	عندي الدوا تاعي.	لدي الدواء الخاص بي.
هل لديكم أفلام للصيف ؟	عندكو أفلام للصيف؟	هل لديكم أفلام للصيف ؟
هل تريد أن تذهب للتسوق معي بعد الظهر ؟	بتحب تيجي معي نتسوق بعد الظهر؟	هل تحب أن تأتي معي للتسوق بعد الظهر ؟
نعم ، سيدي . كيف تريدني أن اقطعها ؟	أيوة ، يا سيدي . كيف بدك إني أقصها؟	نعم ، يا سيدي. كيف تريد أن أقصها ؟
عندما أعود ثانية إلى اليابان ، سأكتب خطاباً . وإذا كان لديك وقت ، من فضلك أرسل لي خطاباً .	لما أرجع مرة ثانية لليابان، رح أكتب رسالة. وإذا كان عندك وقت، تكرم ابعثلي انا رسالة.	عندما أعود ثانية لليابان ، سأكتب رسالة. وإذا كان لديك الوقت ، من فضلك أرسل لي رسالة.
فراولة ، من فضلك .	فراولة، لو سمحت.	فراولة ، من فضلك.
هل تفضل ماسكات للشعر أصغر أم أكبر ؟	بتحبي القناع للشعر أصغر ولا أكبر؟	هل تحبين القناع للشعر الأصغر أم الأكبر ؟
بالتأكيد . متى تود أن تلعب جولف ؟	طبعاً. أميت بدك تلعب جولف؟	بالتأكيد. متى تريد أن تلعب الجولف ؟
من فضلك اجعل الجزء العلوي أطول قليلاً .	من فضلك خلي الجزء الفوقاني أطول شوي.	من فضلك اجعل الجزء العلوي أطول قليلاً.
كم أوقية من العطر أستطيع الحصول عليه من غير رسوم ؟	كم وقية من العطر بقدر أوخذها بدون رسوم ؟	كم زجاجة من العطر يمكنني الحصول عليها بدون رسوم ؟
معذرة , قم بالضغط على مصراعي النافذة الخشبيين , من فضلك .	عفواً، نزل اباجور الشباك الخشب , لو سمحت.	معذرة ، انزل أبجورة النافذة الخشبية, من فضلك.
لدي ثلاث حقائب .	عندي ثلث شناتي.	لدي ثلاث حقائب.
هذا البيت يبدو مريحا للمعيشة فيه , أليس كذلك ؟	هاد البيت مبين كثير مريح العيشة فيه، مش هيك؟	هذا المنزل يبدو مريحاً للعيش فيه ، أليس كذلك ؟
أريد أن أغسل ملابسي في وقت لاحق اليوم .	بدي أغسل وعيتي بوقت ثاني اليوم.	أريد غسل وعائي في وقت لاحق اليوم.
أرجو ذلك .	بتمنى هيك.	أتمنى ذلك.
واحد لنيويورك ، من فضلك .	واحد لنيويورك، إذا سمحت.	واحد إلى نيويورك ، من فضلك.
لا ، إنها لا تشمل الضريبة ومصاريف الخدمة .	لا، هي ما بتشمل الضريبة ومصاريف الخدمة.	لا ، إنها لا تشمل الضريبة ومصاريف الخدمة.
قم بها بطريقتك .	اعملها بطريقتك.	اجعلها بطريقتك.
كم تستغرق مشياً على الأقدام ؟	قديش بتوخذ وقت مشي عالجرين؟	كم تستغرق من الوقت للذهاب إلى جرين ؟
هل يمكنني الحصول على برنامج ؟	بقدر آخذ برنامج؟	هل يمكنني الحصول على برنامج ؟
من فضلك سجل عنوان الاتصال بك هنا .	من فضلك اكتب عنوانك للتواصل معك هون.	من فضلك اكتب عنوانك للاتصال بك هنا.
نعم ، يا سيد تاناكا هناك رسالتان لك .	أيوة، يا سيد تاناكا، في عندك رسالتين.	نعم ، يا سيد تاناكا ، لديك رسالتين.
هل لي في شيء من لحم الخنزير والبيض ؟	ممكن شوية من لحم الخنزير والبيض؟	هل لي ببعض لحم الخنزير والبيض ؟
إذا حدث ذلك ، من فضلك أتصل بي .	اذا صار هيك ، لو سمحت رنلي .	إذا حدث ذلك ، من فضلك اتصل بي.
أوه ، آسف لأني أزعجتك .	اووه، معذرة الك ازعجتك.	أوه ، معذرة لقد ازعجتك.
هل يمكن أن أقيس مقاس تسعة .	ممكن أقيس مقاس تسعة ؟	هل يمكن أن أقيس مقاس تسعة ؟
ملابسه دائماً موضة قديمة .	هدومه دايما موضة قديمة.	ملابس قديمة الطراز.
هلا حجزت لي تاكسي الساعة السادسة صباح غد , من فضلك ؟	ممكن تحجزلي تكسي الساعة ستة الصبح لبكرا ، لو سمحت؟	هل يمكنك حجز سيارة أجرة لي في السادسة صباحاً حتى صباح الغد ، من فضلك ؟
إنه صحيح هنا .	هو صحيح هون.	إنه صحيح هنا.
هل يمكن أن تدخل معه فكة صغيرة ؟	بتقدر ادخل معه شوية فراطة؟	هل يمكن أن أدخل معه بعض الفكة ؟
أنا حقا آسف .	أني جد آسف.	أنا آسف حقاً.
لقد طلبت ذلك .	طلبت هاظ.	لقد طلبت هذا.
ما تكلفة هذا في اليوم ؟	قديش تكلفته ليوم واحد؟	كم تكلفته ليوم واحد ؟
لا توجد أية مشاكل .	ما في أي مشاكل.	لا توجد أية مشاكل.
أجل . سنصل في الثامنة حسب التوقيت المحلي .	أها. رح نوصل الساعة ثمنية بالتوقيت المحلي.	أجل. سنصل في الثامنة بالتوقيت المحلي.
هل لديك واحد أكبر ؟	عندك واحد أكبر؟	هل لديك واحد أكبر ؟
أنا كينجي .	أني كينجي.	أنا كينجي.
إنه المبنى الثاني على يسار هذا المبني الأبيض .	البناية الثانية على يسار البناية البيضا.	المبنى الثاني على يسار المبنى الأبيض.
أعطني قطعة لحم الخنزير هذه ، ولكن ليس بسمك تلك .	أعطييني قطعة لحمة الخنزير هاي، بس ما تكون سميكة مثل هذيك.	أعطني شريحة لحم الخنزير هذه ، ولكن لا تكون سميكة مثل تلك.
لدي موعد آخر .	عندي موعد ثاني.	لدي موعد آخر.
لدي غرفة جاهزة لك في جراند هويتل . هل تستطيع الذهاب إلى هناك ؟	عندي غرفة جاهزة إلك بالجراند هوتيل. بتقدر تروح لهناك؟	لدي غرفة جاهزة لك في جراند هوتيل. هل يمكنك الذهاب إلى هناك ؟
أرني واحدة لإحدى الشابات .	وريني وحدة لوحدة من الصبايا.	أرني واحدة لإحدى الصبايا.
أود أن أحجز غرفة لهذه الليلة .	بدي أحجز غرفة لهاي الليلة.	أريد حجز غرفة لهذه الليلة.
لقد خلعت البنطلون .	شلحت البنطلون.	لقد شللت البنطلون.
إنها رائعة .	هاي روعة.	إنها رائعة.
أهذه هي الحافلة التي توصل إلى وسط المدينة ؟	هاظ هو الباص اللي بوصل لوسط البلد؟	هل هذا هو الأتوبيس الذي يصل إلى وسط المدينة ؟
أتظن ذلك ؟	بتظن هيك؟	هل تعتقد ذلك ؟
أود أن أرسله عن طريق البريد .	حاب أبعثه عن طريق البريد.	أود أن أرسل هذا بالبريد.
أشكرك ثانية لأنك ذكرتني . هل يميل كثير من الناس أن ينسوا توقيع أسمائهم ؟	بشكرك مرة ثانية عشان ذكرتني. بروح كثير من الناس تنسى توقع ع أسمائهم ولا شو؟	شكراً مرة أخرى لأنك ذكرتني. هل يذهب كثير من الناس إلى عدم التوقيع على أسمائهم أم ماذا ؟
هلا أرسلت تاكسي إلى المدخل الرئيسي لـ ويستمانستر مول ؟	ممكن تودي تكسي للمدخل الرئيسي بويستمانستر مول؟	هل يمكنك أن تستقل سيارة أجرة إلى المدخل الرئيسي في ويستمانستر مول ؟
هل لديكم أية جولة سياحية أخرى ؟	عندك أي رحلة ثانية؟	هل لديك أية رحلة أخرى ؟
السيارة تصدر صاخبا غريبا .	السيارة بطلع صوت غريب وعالي.	السيارة تصدر صوتاً غريباً وعالياً.
هذه سبعون دولار .	هاي سبعين دولار.	هذه سبعون دولاراً.
أنا شديد الحساسية للقطط .	أني بتحسس كثير من البسس.	أنا حساس جداً من البس.
لا . قليلاً في الأمام . هناك ، نعم .	لا. شوي لقدام. هناك، إيوه.	لا. لحظة للأمام. هناك ، آه.
ركن المدخنين ، من فضلك . وشباك بجوار النافذة ، من فضلك .	ركن الشيشانيين، إذا سمحت. وشباك جمب النافذة، إذا سمحت.	ركن الشيشانيين ، من فضلك. وشباك بجوار النافذة ، من فضلك.
هل يكلفني دخول هذا المبنى أي أموال ؟	بدفع أي مصاري إذا فتت على هاي العمارة؟	هل أدفع أي رسوم إذا دخلت هذه العمارة ؟
سأكون هنا حتى التاسعة . يحدوني الأمل أن تتمكن من القبض على المجرم في أقرب وقت ممكن .	راح أظل هون للساعة تسعة. بتمنى إنكم تمسكوا المجرم بأسرع وقت.	سأبقى هنا حتى الساعة التاسعة. أتمنى أن تقبضوا المجرم بأسرع ما يمكن.
شكراً لك . من فضلك عاود مرة أخرى .	مشكور. يلا جرب مرة ثانية من فضلك.	شكراً. هيا جرب مرة أخرى من فضلك.
فاتتني محطتي .	راح علي الموقف.	لقد ذهب إلى المحطة.
أين يمكنني أن أقيم أثناء الجولة ؟	وين ممكن أسكن خلال الرحلة؟	أين يمكنني الإقامة خلال الرحلة ؟
إنه لمن دواعي السرور أن أتحدث معك .	إنسريت بالحكي معك.	لقد سررت بالحديث معك.
أي مقاس تريد ؟	شو السايز اللي بدك ياه؟	ما هو السايز الذي تريده ؟
بالتأكيد ، هل تريد تسريحة متموجة دائما ؟	أكيد، بدك اياه كيرلي دايما؟	بالتأكيد ، هل تريد هذا لي دائماً ؟
إلى اليسار ، من فضلك .	على اليسار، لو سمحت.	إلى اليسار ، من فضلك.
لقد أتلفت حقيبتي .	دمرت شنتتي.	لقد تلفت حقيبتي.
البيتزا لذيذة . من صنعها ؟	هاي البيتزا زاكية. مين عملها؟	هذه البيتزا رائعة. من قام بها ؟
أخشى أن أسأل ، لكن ماذا تعني ؟	بخاف اسأل، بس شو قصدك؟	أخشى أن أسأل ، لكن ماذا تعني ؟
لا ، من فضلك اجلس وانتظر . سأعود بعد قليل .	لا، لو سمحت اقعد واستنى. راح أرجعلك بعد شوي.	لا ، من فضلك اجلس وانتظر. سأعود بعد قليل.
الكعب مرتفع جداً .	الكعب عالي كثير.	الكعب مرتفع جداً.
كم سيستغرق إصدار التأشيرة لي ؟	قديش الفيزا بدها وقت عشان تطلع؟	كم تستغرق فيزا السفر من الوقت حتى تغادر ؟
لقد تعطلت سيارتي .	خربت سيارتي .	لقد تعطلت سيارتي.
كيف أثر الركود على الشركة ؟	شلون أثر الركود عالشركة ؟	كيف أثر الركود على الشركة ؟
توجد رحلات جوية على شركات جال وانا التي تقلع في الساعة العاشرة وخمسة وخمسين دقيقة . ولكن , للأسف كلتا الرحلتين محجوزتان .	في طيارات على شركات جال وانا اللي بتغادر الساعة عشرة وخمسة وخمسين دقيقة. بس، للأسف الطيارتين مفللات.	هناك طائرات على شركات جال وأنا التي تغادر في العاشرة وخمسة وخمسين دقيقة. لكن ، للأسف أن هاتين الطائرتين مفللتان.
هل هذا سيفسد ؟	هاذ رح يخرب؟	هل هذا سيتخرب ؟
هل يمكنك أن تخبرني بقيمة هذه المكالمة ؟	بتقدر تحكيلي تكلفة هاي المكالمة؟	هل يمكنك أن تخبرني تكلفة هذه المكالمة ؟
من الأفضل أن تضبط المرآة العاكسة للرؤية الخلفية .	أحسن شي تزبط المراية الخلفية.	أفضل شيء أن تضبط المرآة الخلفية.
كم أجرة التاكسي حتى هذا الفندق ؟	كم أجرة التكسي لعند الفندق؟	كم أجرة التاكسي إلى الفندق ؟
أريد مزيلا لطلاء الأظافر .	بدي أسيتون للمناكير.	أريد أسيتون للمناكير.
ما هي مكونات هذا الطبق ؟	شو مكونات هالصحن؟	ما مكونات هذا الطبق ؟
متى ينبغي أن آتي ؟	متى لازم آجي ؟	متى يجب أن آتي ؟
هل يمكن أن تخبرني عن الأماكن الشيقة هنا ؟	ممكن تحكيلي عن الأماكن الحلوة هون؟	هل لك أن تخبرني عن الأماكن الجميلة هنا ؟
حسنا ، اضغط تسعة وصفر واحد واحد ، ثم الكود الخاص بالبلد ورقم الهاتف .	طيب، إكبس تسعة وصفر واحد واحد، وبعدين الكود تبع البلد ورقم التلفون.	حسناً ، اضغط تسعة صفر واحد واحد ، ثم الكود الخاص بالبلد ورقم الهاتف.
أعتقد أنك ارتكبت خطأً . الغرفة دفع ثمنها مسبقاً . معي إيصال .	بظن إنك غلطت. الغرفة حاسبت عنها قبل. معي وصل.	أعتقد أنك أخطأت. الغرفة قد أغلقت من قبل. معي إيصال.
هل يمكنك أن تتحرك بهذا الاتجاه ؟	بتقدر تمشي بهالجهة؟	هل يمكنك أن تمشي في هذه الناحية ؟
سيغادر قطارك من الرصيف رقم ثمانية .	رح يطلع قطارك من السكة رقم ثمانية.	سوف يغادر قطارك من السكة رقم ثمانية.
أريد غرفة أخرى .	بدي غرفة ثانية.	أريد غرفة أخرى.
لماذا يحدث هذا ؟	ليش بصير هاذ ؟	لماذا يحدث ذلك ؟
ما الرقم الذي أطلب منه هنا ؟	شو الرقم اللي بطلب منه هون؟	ما الرقم الذي أطلب منه هنا ؟
هل يوجد مطعم أرخص قريب من هنا ؟	في مطعم رخيص قريب من هون؟	هل يوجد مطعم رخيص بالقرب من هنا ؟
هل يوجد مطعماً يمكنك أن تزكيه بالقرب من هنا ؟	في مطعم بتنصح فيه قريب من هون؟	هل يوجد مطعم توصي به بالقرب من هنا ؟
أوبرا ميتروبوليتان .	أوبرا المتروبوليتان.	أوبرا المتروبوليتان.
أين المصعد ؟	وين الأصنصير؟	أين المصعد ؟
هل يمكنك أن ترني أشياء أخري ذات تصميمات مختلفة .	ممكن توريني شغلات ثانية بأشكال غير؟	هل لك أن تريني منتجات أخرى بأشكال مختلفة ؟
ليس بمقدورك تغيير وظيفتك بسهولة .	ما بتقدر تغير شغلك ببساطة.	لا يمكنك تغيير عملك ببساطة.
ماذا تسمون هذا بالإنجليزية ؟	شو بتسموه هاذ بالإنجليزي؟	ما تسمونه بهذا بالإنجليزية ؟
سأصل في التاسع من مارس وأغادر في الرابع عشر .	راح أوصل بتسعة ثلاث وراح أروّح بأربعطعش.	سأصل في التاسعة ثلاثة وسوف أغادر في الرابع عشر.
هل ستحدد موعداً للخروج معي ؟	بدك تحدد موعد لتطلع معي؟	هل تريد تحديد موعد للإقلاع معي ؟
لم اسمع بهذا العنوان من قبل بالقرب من هنا .	ما سمعت بهاذ المكان قبل هيك بالمنطقة هون .	لم أسمع بهذا المكان من قبل في المنطقة هنا.
سوف أحضر لك العرض الأسبوع القادم .	بدي اجهزلك العرض الاسبوع الجاي.	أريد أن أعد لك العرض الأسبوع القادم.
صديقي مريض جداً . هل تستطيع أن تطلب دكتور ، من فضلك ؟	صاحبي كثير مريض. ممكن تطلب الدكتور، لو سمحت؟	صديقي مريض جداً. هل يمكنك استدعاء الطبيب ، من فضلك ؟
هل أخذت تذكرة الحافلة ؟	اخذت تذكرة الباص؟	هل أخذت تذكرة الحافلة ؟
يوجد لدى حوالي ألفي وخمسمائة دولار بالين الياباني .	أنا معي حوالي ألفين وخمسميت دولر بالين الياباني.	أنا معي حوالي ألفين وخمسمائة دولار بالين الياباني.
هل يمكنني استئجار مرشداً يتحدث اللغة اليابانية ؟	ممكن أستأجر دليل بسولف ياباني؟	هل يمكن أن أستأجر مرشد يتحدث اليابانية ؟
هذا بعينه ما كنت أبحث عنه .	هاي بالزبط اللي كنت بدور عليه.	هذه هي بالضبط ما كنت أبحث عنه.
رقم مقعدي دي اثنا عشر . أين هو ؟	رقم كرسيي دي اثنعش. وين هو؟	رقم مقعدي هو اثني عشر. أين هو ؟
فينس وليندا يريدان أن يبقيا بمفرديهما ، لذا أخشى أنني لا بد أن أبقى هنا هذه الليلة .	فينس وليندا بدهم يظلوا لحالهم، فبخاف انو لازم اظل هون الليلة.	فينس وليندا يريدون البقاء هنا الليلة. أخشى أنني يجب أن أبقى هنا الليلة.
إنها تبعد حوالي تسعة وتسعون ميلا .	هي بتبعد حوالي تسعة وتسعين ميل.	إنها تبعد حوالي تسعة وتسعين ميلاً.
حسناً ، تم إعادة التأكيد على حجزك .	ماشي، اتأكدنا من حجزك مرة ثانية.	حسناً ، لقد تأكدنا من حجزك مرة أخرى.
حسناً ، فلنق نظرة عليك .	طيب ، خلينا نطل عليك .	حسناً ، دعنا نطل عليك.
هل يجب على أن أجيب بـ نعم أو بـ لا ؟	لازم اجاوب بـ اه أو بـ لأ ؟	هل يجب أن أجيب بنعم أو بـ لا ؟
من فضلك ، بدلي شيك المسافرين إلي نقود .	لو سمحت اصرفلي هاد الشك السياحي كاش.	من فضلك اصرف هذا الشك السياحي نقداً.
من فضلك دلني على أرخص وسيلة للذهاب إلى سان فرانسيسكو .	من فضلك دلني على أرخص طريقة حتى أروح على سان فرانسيسكو.	من فضلك دلني على أرخص طريقة للذهاب إلى سان فرانسيسكو.
أريد غرفة مفردة بحمام لقاء ثمانين دولارا ، من فضلك .	بدي غرفة فردية مع حمام بـثمانين دولار, لو سمحت.	أريد غرفة مفردة بحمام بثمانيون دولاراً, من فضلك.
من فضلك ، هل رسمت لي خريطة بسيطة من هنا ؟	من فضلك، بتقدر ترسملي خريطة سهلة من هون؟	من فضلك ، هل لك أن ترسم لي خريطة سهلة من هنا ؟
ليس لدي أية مضارب أو أحذية .	ما عندي لا مظارب ولا أحذية.	ليس لدي أي مضارب ولا أحذية.
أوه ، يبدو أنني افقد شيء ما كل وقت أسافر فيه .	أوه، شكلني بضيع اشي كل مرة بسافر فيها.	أوه ، يبدو أنني أفقد شيئاً كل مرة أسافر فيها.
أجل ، إنها مفتوحة من التاسعة حتى التاسعة .	أها ، هي فاتحة من الساعة تسعة للساعة تسعة.	أوه ، إنها مفتوحة من التاسعة حتى الساعة التاسعة.
سيأتي القطار السريع التالي بعد ساعة .	راح يجي القطار السريع الجاي بعد ساعة.	سوف يأتي القطار السريع التالي بعد ساعة.
مرحبا . كيف حالك ؟	مرحبا . كيف حالك؟	مرحبا. كيف حالك ؟
تاريخ الانتهاء تسعة عشر من مارس تسعة وتسعين .	تاريخ انتهاء الصلاحية تسعطعش من شهر ثلاث التسعة وتسعين.	تاريخ انتهاء الصلاحية هو التاسع عشر من مارس تسعة وتسعين.
هلا احتفظت بهذا لي ؟	ممكن تظبلي هاد؟	هل يمكنك أن تأخذ هذا ؟
هل تقبل بالين الياباني ؟	بتوخذ بالين ياباني؟	هل تأخذ بالين ياباني ؟
من فضلك ، اكتب رقم الغرفة في الخلف .	من فضلك ، اكتب رقم الغرفة بقفى الورقة.	من فضلك ، اكتب رقم الغرفة في قفا الورقة.
هل يمكنك أن تصلح ذلك ؟	بتقدر تصلح هاي؟	هل يمكنك إصلاح هذه ؟
سيداتي سادتي ، لدينا على متن رحلتنا اليوم مضيفين يتحدثون اليابانية يمكن التعرف عليهم من خلال الشارة التي يلبسونه . إذا كنت تعرف أي شخص يريد مساعدة في الترجمة ، من فضلك دعنا نعرف .	سيداتي وسادتي،برحلتنا اليوم، عنا مضيفين بحكوا ياباني بتعرفوهم من الباجة اللي لابسينها. إذا بتعرف إنه أي حد بحتاج مساعدة بالترجمة، لو سمحت خلينا نعرف.	السيدات والسادة ، في رحلتنا اليوم ، لدينا مضيفين يتحدثون اليابانية يعرفون من الملابس التي ترتديها. من فضلك دعنا نعرف.
هل يجب أن أدفع الرسم الإضافي عندما أدخل مبنى ؟	لازم أدفع رسوم ثانية بس أفوت عأي مبنى؟	هل يجب أن أدفع رسماً آخر عندما أدخل أي مبنى ؟
لقد انكسرت السنة .	انكسرت السنة.	لقد كسرت السنة.
تبدو البونساي كهواية شخص هرم .	شكلها البونساي هواية الختيار.	تبدو البونساي هواية الختيار.
لدينا غرفة مزدوجة بحمام بخمسة و ثمانين دولار .	عنا غرفة مزوجة مع حمام بخمسة وثمنين دولار.	لدينا غرفة مزوجة بحمام بخمسة وثمانين دولاراً.
هل هذه من نوع ليفي خمسة صفر المعتمدة ؟	هاي من نوع ليفي خمسة صفر الأصلية؟	هل هذه من نوع ليفي خمسة صفر الأصلية ؟
هل يمكن أن أبيت عندكم الليلة ؟	بقدر أبات عندكو الليلة؟	هل يمكنني أن أذهب إليكم الليلة ؟
هل تود منضدة في المطعم الرئيسي أو في غرفة خاصة يا سيدي ؟	سيدي، بتحب طاولة بالمطعم الرئيسي ولا بغرفة خاصة؟	يا سيدي ، هل تفضل منضدة في المطعم الرئيسي أم في غرفة خاصة ؟
مائة بالمائة قطن .	مية بالمية قطن .	مائة بالمائة قطن.
إنها لذيذة جداً .	كثير طيبة.	إنها طيبة جداً.
هل أستطيع التحدث مع المدير ؟	بقدر أحكي مع المدير؟	هل يمكنني الاتصال بالمدير ؟
أنا آسف ، هو ليس بالداخل الآن .	أني آسف، هو مش جوا هسا.	أنا آسف ، إنه ليس بالداخل الآن.
أريد غرفة بسريرين . ما ثمن الغرفة في الليلة ؟	بدي غرفة بتختين. قديش تكلفة الغرفة بالليل؟	أريد غرفة بسريرين. كم تكلفة الغرفة الليلة ؟
ابقى على الخط وانتظر لحظة من فضلك .	خليك على الخط و استنى شوي من فضلك.	احتفظ بالخط و انتظر لحظة من فضلك.
هل يمكنني أن أرسل أي ميل واحد فقط قيمته دولار .	بقدر أبعث أي ميل واحد تكلفته بس دولر؟	هل يمكنني إرسال أي ميل واحد تكلفته دولار واحد ؟
من أين تغادر الحافلات لمشاهدة المعالم ؟	من وين بتطلع الباصات حتى نشوف المناظر؟	من أين تأتي الحافلات لمشاهدة المناظر ؟
هل لديك ألوان أخرى من هذا ؟	عندك ألوان ثانية من هاذ؟	هل لديك ألوان أخرى من هذا ؟
اذهب إلى نادي رياضي كل يومين .	روح عالجيم كل يومين.	اذهب إلى الحمام كل يومين.
تم الفصل بين مقاعدنا .	صار فصل بين كراسينا.	لقد حدث فصل بين مقاعدنا.
هل لك أن تخبرني عن مكان تحليق الطائرة الآن ؟	بتقدر تحكيلي وين بطير الطيارة هسا؟	هل لك أن تخبرني أين تطير الطائرة الآن ؟
كيف ترغب في إجراء المكالمة ؟	شلون بدك تعمل المكالمة؟	كيف تريد إجراء مكالمة ؟
أفهم ذلك . أحاول استئجار سيارة سيتروين .	بفهم هالاشي. بحاول أستأجر سيارة سيتروين.	أفهم ذلك. أحاول استئجار سيارة سيتروين.
هذه هي الغرفة اثنا عشر صفر سبعة .	هاي هي الغرفة اثنعش صفر سبعة.	هذه هي الغرفة اثني عشر صفر سبعة.
هل لك أن تأخذ هذا ، من فضلك ؟	ممكن توخذ هاذ، لو سمحت؟	هل يمكنك أن تأخذ هذا ، من فضلك ؟
كم عمر هذا الصبي ؟	قديش عمر هالولد؟	كم عمر هذا الولد ؟
قارب مع مرشد ، من فضلك .	قارب مع مرشد ، لو سمحت.	قارب مع مرشد ، من فضلك.
القهوة غير محسوبة .	القهوة مش محسوبة؟	هل القهوة غير محسوبة ؟
لقد أضعت تذكرة الطيران الخاصة بي .	انا ضايع تذكرة الطيران حقتي.	أنا تائه عن تذكرة الطيران الخاصة بي.
نعم , في بادئ الأمر ، اغسليها على منفصلة .	أيوة, بالأول, غسليها لحالها.	نعم ، في البداية ، غسلها بمفردها.
هل يمكنني أن التقط بعض الصور ؟	ممكن اوخذ شوية صور؟	هل يمكن أن آخذ بعض الصور ؟
هلا فتحت هذه الحقيبة ، من فضلك ؟ ماذا يوجد هنا .	بتقدر تفتح هاي الشنطة، لو سمحت؟ شو لقيت فيها هون؟	هل يمكنك أن تفتح هذه الحقيبة ، من فضلك ؟ ماذا وجدت فيها هنا ؟
ما نوع هذه الموسيقى ؟	شو نوع هاي الموسيقى؟	ما نوع هذه الموسيقى ؟
أريد بعض الكريم للأيدي .	بدي شوية كريم للإيد.	أريد بعض كريم اليد.
مائة غير المدخنين من فضلك .	مية غير اللي بدخنوا، لو سمحت.	مياه غير المدخنين ، من فضلك.
من فضلك أعطني بعض الفكة .	لو سمحت اعطيني شوية فراطة.	من فضلك أعطني بعض الفكة.
بالتأكيد . لدينا بعض الماركات الأمريكية الأصلية الجميلة . للكتب .	أكيد. عنا شوية ماركات أمريكية أصلية حلوة. للكتب.	بالتأكيد. لدينا بعض ماركات أمريكية أصلية جميلة. للكتب.
لدي وصولها ، سوف ندفع ثمن شحنها إلى عنوان منزلك .	لما توصل. راح ندفع حق الشحن لعنوان بيتك.	عندما تصل. سوف ندفع ثمن الشحن إلى عنوان بيتك.
إنها مشغولة .	هيه مشغولة.	إنها مشغولة.
سرقت حقيبتي في الشارع .	انسرقت شنتي بالشارع.	لقد سرقت حقيبتي في الشارع.
لم تصنع هذه باليابان ، أليس كذلك ؟	ما صنعت هاي باليابان، صح؟	لم تصنع هذه في اليابان ، أليس كذلك ؟
سيبدأ الصعود على متن الطائرة الساعة الرابعة والنصف لذلك من فضلكم كونوا هناك قبل هذا الموعد .	رح يبلش الصعود على الطيارة الساعة أربعة ونص . لذالك لو سمحتو كونو هون قبل هذا الوقت.	سيبدأ الصعود على متن الطائرة في الرابعة والنصف. لذلك من فضلكم كونوا هنا قبل هذا الوقت.
نحن هنا لمدة يوم .	إحنا هون لمدة يوم.	نحن هنا لمدة يوم.
لقد فقدت شيكاتي السياحية .	ضيعت الشيكات السياحية تبعتي.	فقدت الشيكات السياحية الخاصة بي.
ما أنواع الخضراوات الموجودة لديك ؟	شو هي الخضرة اللي عندك؟	ما هي الخضراوات التي لديك ؟
يجب أن أنتقل إلى عربة مكيفة واحد صفر صفر . هل هذا ممكن ؟	بدي انتقل لعرباية مكيفة واحد صفر صفر. ممكن؟	أريد الانتقال إلى عربة مكيفة واحد صفر صفر. هل يمكن ذلك ؟
نعم ، حجز لمدة ستة أيام من فضلك ، بدء من الثالث والعشرين من يوليو .	ايوه، حجز لست أيام لو سمحت، ببلش من ثلاث وعشرين ستة.	نعم ، حجز لستة أيام من فضلك ، يبدأ من الثالث والعشرين من يونيو.
من أي مكان يمكنني أن أغير القطار الذي يوصلني إلى إدنبره ؟	منين بقدر أغير القطار اللي بوصلني لادنبرة؟	من أين يمكنني تغيير القطار الذي يوصلني إلى أيرلندرة ؟
أكثر منتجاتنا بيعت عبر السنوات الأربع الماضية هي الآلة الناسخة طراز أ . أكس أربعة خمسة صفر .	أغلب اللي بعناه من منتجاتنا على مرّ الأربع سنين اللي فاتت هي الآلة الناسخة، طراز أ . أكس أربعة خمسة صفر.	أغلب ما نعثر عليه من منتجاتنا على مرّ الأربع سنوات الماضية هي الآلة الناسخة ، طراز أ. أكس أربعة خمسة صفر.
آسف سأعود لاحقاً .	آسف. راح أرجع بعدين.	آسف. سأعود فيما بعد.
هل يتحتم عليك كثيراً أن تعمل حتى ساعة متأخرة ؟	بتظطر كثير تشتغل لوقت متأخر؟	هل تضطر كثيراً للعمل حتى وقت متأخر ؟
هل لديك نفس هذا التصميم بكعب أعلى ؟	عندك نفس هاذ الديزاين بس كعب أعلى؟	هل لديك نفس هذا التصميم ولكن كعب أعلى ؟
التكلفة ، من فضلك . هل تقبلون بطاقة فيزا ؟	الحساب ، لو سمحت. يتقبلو بطاقة فيزا؟	الحساب ، من فضلك. هل تقبلون بطاقة فيزا ؟
من فضلك استلق هنا .	لو سمحت، اتمدد هون.	من فضلك اجلس هنا.
اسمي ميتشكو تاناكا ، ورقم الرحلة إلى طوكيو هو خمسة ، صفر ، واحد .	اسمي ميتشكو تاناكا، ورقم الرحلة لطوكيو هو خمسة، صفر، واحد.	اسمي ميتشكو تاناكا ، ورقم الرحلة إلى طوكيو هو خمسة ، صفر ، واحد.
آه ، كلا . من فضلك أسرع . إننا متأخرون .	آه، لأ. لو سمحت عجل، إحنا متأخرين.	آه ، لا. من فضلك عجل ، نحن متأخرين.
ما هي أفضل جولة حتى أرى أشهر الأماكن ؟	شو هي أحسن رحلة عشان أشوف أشهر الأماكن؟	ما هي أفضل رحلة لمشاهدة أشهر المعالم ؟
حسنا . مقعدان من فضلك .	ماشي. كرسيين لو سمحت.	حسناً. مقعدان من فضلك.
أظن أنه بديع المنظر .	بظن انه منظره صاير حلو.	أعتقد أن منظره جميل.
بنطلون أخر ؟	بنطلون ثاني؟	هل يوجد بنطلون آخر ؟
سأجرب بعضاً من الشراب المثلج .	بدي أجرب شوي من العصير المثلج.	أريد أن أجرب بعضاً من العصير المثلج.
هل هذا هو الطريق الصحيح إلى المحطة المركزية ؟	هاد الطريق الصح للمحطة الرئيسية؟	هل هذا هو الطريق الصحيح إلى المحطة المركزية ؟
أريد شراء تذكارات لأصدقائي . أيمكن أن تُوصي ببعض منها ؟	بدي أشتري هدايا تذكارية لأصحابي. ممكن تنصحني بإشي؟	أريد شراء هدايا تذكارية لأصدقائي. هل لك أن تزكي لي شيئاً ؟
أريد الحصول على تأمين .	بدي تأمين.	أريد تأميناً.
آوه إلقاء نظرة على صندوقك .	واو أنا حاب أشوف صندوقك.	أوه أنا أود أن أرى صندوقك.
إنها أربعة عشرة .	هاي أربعطعش.	هذه أربعة عشر.
سأنتظر حتى يتاح الجلوس في التراس .	رح أستنا لحتى يصير الجلوس بالتراس ممكن.	سأنتظر حتى يكون الجلوس في التراس ممكناً.
يمكنك أن تمكث في منزلي .	ممكن تفضل تقعد ببيتي.	يمكنك أن تفضل الجلوس في منزلي.
هذا , من فضلك .	هاظ ، لو سمحت.	هذا ، من فضلك.
من فضلك نظف هذا المعطف .	لو سمحت نظف هاظا الكبوت.	من فضلك نظف هذا الكبوت.
شراب الشمام كحلاء ، من فضلك .	عصير الشمام كحلو ، لو سمحت.	عصير الشمام حلو ، من فضلك.
أخطط لتعلم الجولف .	بفكر أتعلم جولف.	أود أن أتعلم الجولف.
كان هذا مكسوراً بالفعل عندما فتحت الطرد .	كان هاذ مكسور فعلاً لما فتحت الطرد.	كان هذا مكسور حقاً عندما فتحت الطرد.
توقفت ساعتي .	ساعتي وقفت.	ساعتي توقفت.
أجل . إنها مشكلة تخلص من الفضلات .	أيوة. هاي مشكلة كب الزبالة.	نعم. هذه هي مشكلة كب الزبالة.
هناك محل لبيع الزهور في الطريق .	في محل ورد بالطريق .	يوجد محل ورد في الطريق.
هل السيدات يقبلن هذا ؟	الستات بقبلن بهاذ؟	هل السيدات يقبلن بهذا ؟
هل يمكننا ترك أشياءنا ما عدا الأشياء القيمة في الحافلة ؟	بنقدر نخلي اغراضنا هون، ماعيدا الأشياء الغالية، في الباص؟	هل يمكننا أن نترك أمتعتنا هنا ، ما عدا الأشياء القيمة ، في الحافلة ؟
بمقدورك أن ترى واحداً عند " كارينجي هول " .	بامكانك تشوف واحد بقاعة كارنيجي.	يمكنك أن ترى واحداً في قاعة كارنيجي.
آسف جدا ، لكني أود تأجيل الميعاد .	آسف كثير، بس بدي أجل الموعد .	آسف جداً ، لكنني أريد تأجيل الموعد.
أجل , يمكننا القيام بخدمتك بداية من السابعة .	اها، منقدر نخدمك من الساعة السابعة.	نعم ، يمكننا خدمتك من الساعة السابعة.
على أي جانب من ميدان الاتحاد هي ؟	على اي جهة من دوار الاتحاد بتكون؟	على أي جهة من دوار الاتحاد تكون ؟
أريد بعضاً من كريم التنظيف .	بدي شوية كريم تنظيف.	أريد بعض كريم التنظيف.
من فضلك لفها كل على حدة .	من فضلك غلفها كل وحدة لحالها .	من فضلك غلفها كل واحدة منفردة.
كود المنطقة هو ثلاثة . ورقم الهاتف هو اثنان ثلاثة أربعة ثلاثة أربعة صفر صفر .	رقم المنطقة ثلاثة. ورقم التلفون اثنين ثلاثة أربعة ثلاثة اربعة صفر صفر.	رقم المنطقة ثلاثة. ورقم الهاتف اثنان ثلاثة أربعة ثلاثة أربعة أربعة صفر صفر.
كم عدد المرات التي سأغير فيها القطارات للوصول إلى هناك ؟	كم قطار رح اركب عشان أوصل هناك؟	كم قطار سأركب للوصول إلى هناك ؟
هل تريد تسوية الفاتورة الآن ؟	راح تحاسب عالفاتورة هسا؟	هل ستحاسب على الفاتورة الآن ؟
هل هذه السيارة الأجرة متاحة ؟	هاي التكسي فاضية؟	هل هذه السيارة الأجرة متاحة ؟
هل يمكن أن تدلني على بعض الفنادق الرخيصة والنظيفة ؟	بصير ادلني عبعض الفنادق الرخيصة والنظيفة؟	هل يمكن أن تدلني ببعض الفنادق الرخيصة والنظيفة ؟
أنا مع بعض الأصدقاء .	أنا مع شوية صحاب.	أنا مع بعض الأصدقاء.
لشخصين عند الساعة السابعة , الاسم وتاناب .	لشخصين الساعة سبعة. الاسم وتاناب.	لشخصين الساعة السابعة. الاسم وتاناب.
ما هو الإجمالي ؟	شو الإجمالي؟	ما الإجمالي ؟
أين يمكنني أن أشتري زلاجات وأحذية ؟	من وين بقدر اشتري زلاجات و أحذية؟	من أين يمكنني شراء الزلاجات والأحذية ؟
ما وجه الاختلاف بين منتجك ومنتج منافسيك ؟	شو الفرق بين منتجك ومنتج الناس اللي بتنافسك؟	ما هو الفارق بين منتجك ومنتج المنافسين ؟
أين تعلم السيد جونز اللغة اليابانية ؟	وين السيد جونز تعلّم اللغة اليابانية؟	أين السيد جونز تعلم اللغة اليابانية ؟
لا يمكنني وضع الأمتعة تحت المقعد . هل لك أن تحتفظ بها لأجلي من فضلك ؟	أنا ما بقدر أحط شنطي تحت المقعد. ممكن تخبيلي ياهم لو سمحت؟	أنا لا أستطيع وضع حقائبي تحت المقعد. هل يمكنك أن تحفظها من فضلك ؟
هل يمكنك أن تستدعي موظفاً يتحدث اليابانية ؟	ممكن تنادي موظف بحكي بالياباني؟	هل يمكنك استدعاء موظف يتحدث اليابانية ؟
سوف أبلغ الشرطة بذلك .	راح أبلغ الشرطة بهاظ الإشي.	سأبلغ الشرطة بهذا الأمر.
عيد ميلادك اقترب .	عيد ميلادك قرب.	عيد ميلادك يقترب.
تعثر صديقي والتوي كاحله .	صاحبي وقع والتوى كاحله.	لقد سقط وتقطعت أكحله.
نعم , أعتقد ذلك .	اه، بتوقع هيك.	نعم ، أعتقد ذلك.
اتجاه واحد .	اتجاه واحد.	اتجاه واحد.
هلاّ جعلت توقيعك هنا والحروف الأولى من اسمك هنا .	هات خلي توقيعك هون وأول حروف اسمك هون.	دع توقيعك هنا وأول حروف اسمك هنا.
أين يمكن أن أوقف سيارتي ؟	وين ممكن أقف سيارتي؟	أين يمكنني أن أقف سيارتي ؟
سأغلق الآن . شكراً على انتباهكم .	رح أسكر هسا. شكراً على انتباهكو.	سأغلق الآن. شكراً على انتباهكم.
اللعنة . اللعنة . اللعنة . اللعنة . لقد كبرت معتاداً على وجهها .	يلعن. يلعن. يلعن. يلعن. أنا تعودت كثيرعلى وجهها.	اللعنة. يلعن. يلعن. أنا تعودت كثيراً على وجهها.
سنراك في الغد .	رح نشوفك بكرة.	سنراك غداً.
عندي ثلاثة أطفال .	عندي ثلاث ولاد.	لدي ثلاثة أطفال.
نعم ، هي ، لأنك تستطيع أن ترى العلم أمام مكتب البريد .	صح، هي . لأنه بتقدر تشوف العلم قدام مكتب البريد.	نعم ، هي. لأنك تستطيع رؤية العلم أمام مكتب البريد.
هل تستطيع إنزال أمتعي إلى الردهة غداً صباحاً ؟	ممكن تنزل أغراضي على الردهة بكرة الصبح؟	هل يمكنك أن تنزل أمتعتي في الردهة صباح الغد ؟
أربع ليالي .	أربع ليالي.	أربع ليال.
دقيقة فقط ، من فضلك .	ديقة بس، لو سمحت.	ديقة فقط ، من فضلك.
هل ستواجهني أية صعوبات في الجمارك ؟	راح ألاقي أي صعوبة بالتعامل مع الجمارك؟	هل سأواجه أية صعوبة في التعامل مع الجمارك ؟
هلا أخبرتني كيفية تعديلها من فضلك ؟	ممكن تحكيلي كيف اعدلها لو سمحت؟	هل لك أن تخبرني كيف أعدلها من فضلك ؟
حسنا ، لا أعلم بعد لكنني سوف أحاول بالتأكيد .	ماشي، مش عارف لحد الآن بس رح أحاول أكيد.	حسناً ، لا أعرف حتى الآن ولكنني سأحاول بالتأكيد.
موعده المقرر هو الثامنة والنصف مساءْ بالتوقيت المحلي .	موعده هو الساعة ثمنية ونص المسا بالتوقيت المحلي.	موعده هو الثامنة والنصف مساءا بالتوقيت المحلي.
هل يمكن أن تضع حقيبة السفر هذه في صندوق السيارة .	ممكن لو سمحت تحطلي شنة السفر هاي بالطبون ؟	هل لك من فضلك أن تضع حقيبة السفر هذه في الطبون ؟
هذه ليست تفاحة ولكنها خوخة .	هاي مش تفاحة هاي خوخة.	إنها ليست تفاحة هذه خوخة.
إذا كان بالإمكان ، لم أكن لأخلع السنّة .	اذا ممكن، أنا بفضل ما تقلع السن.	إذا أمكن ، أنا أفضل ألا تقلع السن.
علي أن أفحص ذلك مع زوجتي .	لازم أشوف الموضوع مع مرتي.	يجب أن أرى الأمر مع زوجتي.
لا أعتقد أن هذه السكينة نظيفة . أيمكنك أن تُحضر لي واحدة أخرى ؟	أنا ما بظن إنه هاي السكينة نظيفة. بتقدر تجبلي وحدة تانية؟	أنا لا أعتقد أن هذه السكينة نظيفة. هل يمكنك أن تحضر واحدة أخرى ؟
املأ البنود الآتية في بطاقة التسجيل .	املي البنود اللي جاية على كرت التسجيل.	املأ البنود التي ستأتي على بطاقة التسجيل.
ما الذي يمكن أن أراه في هذه الجولة ؟	شو بقدر أشوف بهاي الرحلة؟	ماذا يمكنني أن أرى في هذه الرحلة ؟
هل هذا المتبل حار ؟	هاظ المتبل حار؟	هل هذا المتبل حار ؟
هذه كلها مطبوعات .	هاي كلها مطبوعات.	هذه كلها مطبوعات.
هذه هديه لصديق .	هاي هدية لرفيقي.	هذه هدية لرفيقي.
أراهن بخمسة دولارات .	براهن بخمس دولارات .	أراهن بخمسة دولارات.
هل توجد أية جولة صباحية ؟	في أي جولات صباحية؟	هل هناك أية جولات صباحية ؟
سنمكث .	راح نظل.	سنمكث.
هل توجد غرفة استراحة عامة بالقرب من هنا ؟	في غرفة استراحة عامة جنبنا هون؟	هل توجد غرفة استراحة عامة بالقرب من هنا ؟
آسف ، لقد تحققت من إدارة الخدمة وإدارة المفقودات ولم أجدها عندهم .	بعتذر، تأكدت من إدارة الخدمة وإدارة المقودات وما لقيتها عندهم.	آسف ، لقد تأكدت من إدارة الخدمة وإدارة المقودات ولم أجدها لديهم.
هل قلت لي كيف أذهب إلى المتحف ؟	قلتلي كيف بروح على المتحف؟	هل قلت لي كيف أذهب إلى المتحف ؟
لا أريد إنفاق أكثر من عشرين دولاراً .	ما بدي أصرف أكثر من عشرين دولار.	لا أريد إنفاق أكثر من عشرين دولاراً.
هذا المكان مكتظ بالناسب ، أليس كذلك ؟	هاظ المكان معبى ناس، مش هيك؟	هذا المكان مملوء بالناس ، أليس كذلك ؟
سأحضر المدرسة الصيفية بجامعة هاواي .	رح أداوم بالمدرسة الصيفية بجامعة هاواي.	سأواصل الدراسة الصيفية في جامعة هاواي.
من فضلك اعطني تصريحاً سارياً لمدة أسبوع .	لو سمحت أعطيني اذن لمدة أسبوع.	من فضلك أعطني أذن لمدة أسبوع.
ما هذا من فضلك ؟	شو هاظ لو سمحت؟	ما هذا من فضلك ؟
سأحتاج إلى بطاقة ائتمان .	راح أحتاج الفيزا .	سأحتاج إلى الفيزا.
إذن دعنا نبطنها من الداخل .	معناته خلينا نحشيها من جوا.	إذن دعنا نحشيها من الداخل.
هل هذه محطة قطار سريع ؟	هاي محطة اكسبريس؟	هل هذه محطة إكسبريس ؟
من ثمانية إلى اثنى عشر من فضلك .	من ثمانية ل اثنعش لو سمحت.	من ثمانية إلى اثني عشر من فضلك.
أود قياس بذلة السباق الخاصة بي .	بدي اقيس بدلة السباق تبعتي.	أريد أن أقيس بدلة السباق الخاصة بي.
لقد طلبته منذ وقت طويل .	طلبته من زمان.	لقد طلبته منذ زمن طويل.
أين الحمام ؟	وين الحمام؟	أين دورة المياه ؟
اليابانيون لا يأخذون إجازات طويلة .	اليبانيين ما بيوخذو عطل طويلة.	اليبان لا يأخذون عطلات طويلة.
هاهي .	هيها .	إنها.
أنها مناسبة تماما .	زابطة تماما.	إنها واضحة تماماً.
مرحبا . هذه هي الخطوط الجوية المتحدة .	مرحبا . هاي هي الخطوط الجوية المتحدة .	مرحبا. هذه هي الخطوط الجوية المتحدة.
أعيش في شقة إيجارها ثمانون ألف ين في الشهر .	بعيش بشقة، الإجارتها ثمانين ألف ين بالشهر.	أعيش في شقة ، الإيجار يبلغ ثمانين ألف ين في الشهر.
هل هناك أماكن شاغرة بالنسبة لرحلة الخميس ؟	في أماكن فاظية برحلة يوم الخميس؟	هل توجد أماكن شاغرة في رحلة يوم الخميس ؟
أعرف نادي قديم لموسيقى الجاز بوسط البلد .	بعرف نادي قديم لموسيقى الجاز بوسط البلد.	أعرف نادياً قديماً لموسيقى الجاز في وسط المدينة.
هل انعطف يساراً ؟	بدي ألف يمين؟	أريد ألف يميناً ؟
أحبه فعلاً .	بحبه فعلا.	أحبه حقاً.
من فضلك احفظ هذه الحقائب في محتجز الجمارك .	لو سمحت خلي هالشنتات بالجمارك.	من فضلك احتفظ بهذه الحقائب في الجمارك.
هل يمكنني استخدام إِشارة ضوئية ؟	ممكن استعمل إشارة ضوئية؟	هل يمكن أن استخدم إشارة ضوئية ؟
أعمل في شركة نشر .	بشتغل بشركة نشر.	أعمل في شركة نشر.
اتجه يساراً في هذا الشارع ثم انعطف عند أول منعطف يمين .	روح يمين بهالشارع وبعدين اتوجه يمين عند اول منعطف.	اتجه يميناً في هذا الشارع ثم اتجه يميناً عند أول منعطف.
بالفعل لدي أخبار . أنا سأتزوج .	فعلياً، عندي أخبار. أنا بدي أجوز.	بالفعل ، لدي أخبار. أنا أريد أن أجوز.
واحد هامبرجر وواحد شيز برجر ، من فضلك .	واحد همبرقر وواحد شيز برقر، لو سمحت.	واحد همبرجر وواحد شيز برجر ، من فضلك.
أوه ، آسف . كانت هناك مشاكل ونحن نقوم بحلها ، هل تتفضل بالانتظار لمدة ثلاثين دقيقة ؟	أووه، أنا آسف. كان في مشاكل منحلها. ممكن تستنى لثلاثين دقيقة؟	أوه ، أنا آسف. كان هناك مشاكل في حلها. هل يمكنك الانتظار لثلاثين دقيقة ؟
كم عددها ؟	كم عددها ؟	كم عددها ؟
و هو كذلك . سأوصلك إلى هناك .	و هو هيك . رح اوصلك لهناك.	وهو كذلك. سأصلك إلى هناك.
أريد فندق أرخص قليلاً .	بدي فندق أرخص شوي.	أريد فندقاً أرخص قليلاً.
الأجدر بك أن تكف عن ذلك .	أحسنلك تبطل هالاشي.	من الأفضل أن تتوقف عن ذلك.
هل أي من المتاجر الكبيرة به يعمل الآن ؟	في أي مول فاتحة هسه؟	هل توجد أي متاجر مفتوحة الآن ؟
كم تستغرق حتى تصبح متاحة .	قديش بدها حتى تصير فاظية .	كم من الوقت يستغرق الحصول عليها ؟
معذرة . أريد أن أطلب طلب .	معلش . بدي أطلب طلب .	معذرة. أريد أن أطلب طلباً.
عندنا حفلة مساء الجمعة . لماذا لا تنضم لنا ؟	عنا حفلة يوم الجمعة بالليل. ليش ما تيجي معنا؟	لدينا حفلة يوم الجمعة ليلا. لماذا لا تأتي معنا ؟
كيف أستقلها ؟	كيف اركبهاا؟	كيف أركبها ؟
هل هي جولة يوم كامل ؟	هي الرحلة ليوم كامل؟	هل هي رحلة ليوم كامل ؟
في أي وقت يمكنني مغادرة الفندق ؟	بأي ساعة ممكن أعمل خروج من الفندق؟	في أي وقت يمكنني أن أقوم بعمل خروج من الفندق ؟
أحضر لي بعض من الجبن المبشور .	هاتلي شوي من الجبنة المبروشة.	أعطني بعضاً من الجبن المبروش.
هل لديك أحذية حريمي عند أصابع القدم ؟	عندك كنادر ستاتي مفتوحة من عند الأصابع؟	هل لديك بعض حقائب السيدات مفتوحة من عند الأصابع ؟
هذه كبيرة جداً .	هاي كثير كبيرة.	إنها ضخمة جداً.
نبيذ غير حلو ، من فضلك .	واين بدون سكر، لو سمحت.	أين بدون سكر ، من فضلك.
تبلغ الميزانية أقل من ألف دولار .	الميزانية أقل من ألف دولار.	الميزانية أقل من ألف دولار.
إنها معطلة . هل تستطع فحص آلة التصوير هذه ؟	هاي معطلة. بتقدر تشيّك على آلة التصوير هاي؟	إنها معطلة. هل يمكنك أن تستعير آلة التصوير هذه ؟
لقد كان هناك حادث مرور .	كان في حادث سير.	كان هناك حادث سير.
إجمالي سكان اليابان حوالي مائة وثلاثين مليوناً .	العدد الكلي لسكان اليابان حوالي مية وثلاثين مليون.	العدد الإجمالي لسكان اليابان حوالي مائة وثلاثين مليوناً.
أي نوع من الملابس ؟	أي نوع من الأواعي ؟	أي نوع من الملابس ؟
في أي مجال كان من قبل ؟	بأي مجال هو كان قبل؟	في أي مجال كان قبل ؟
كم تتكلف الليموزين للذهاب إلى وسط المدينة ؟	قديش تكلف الليموزين عشان نروح عوسط البلد؟	كم تتكلف الليموزين للذهاب إلى وسط المدينة ؟
الاسم هو جورو موتوياما . والرقم هو صفر ثلاثة ثلاثة اثنان ستة واحد اثنان أربعة تسعة خمسة .	الاسم هو جورو موتوياما . والرقم هو صفر ثلاثة ثلاثة اثنان ستة واحد اثنان أربعة تسعة خمسة .	الاسم هو جورو موتوياما. والرقم هو صفر ثلاثة ثلاثة اثنان ستة واحد اثنان أربعة تسعة خمسة.
لا ، ولكن شكراً لك . إنني أشعر بتحسن .	لا، بس شكرًا هونيك. أنا حاسس انو صرت أحسن.	لا ، شكراً لك هنا. أشعر أنني قد تحسن.
هل لك أن نبدل مقاعدنا من فضلك ؟	ممكن نبدل كراسينا لو سمحت؟	هل يمكن أن نبدل مقاعدنا من فضلك ؟
هل هناك مكان يتم فيه عزف الموسيقي الريفية ؟	ما في أي مكان بعزف ألحان ريفية؟	ألا يوجد أي مكان يعزف ألحان ريفية ؟
هلا أخبرتني قبل أن نصل إلى درهام ؟	بصير تخبرني قبل ما نوصل لـ درهام؟	هل أخبرتني قبل أن نصل إلى درهام ؟
ظل سائراً عبر هذا الممر , وستجدها على الجانب الأيمن .	ظل ماشي بالممر هاذ , و رح تلاقيها عالجهة اليمين.	استمر في هذا الممر, وستراها على الجانب الأيمن.
أشعر بصداع .	بحس بصداع.	أشعر بصداع.
عامل الصيانة سيصعد في الحال .	عامل الصيانة راح يطلع مباشرة.	عامل الصيانة سوف يغادر مباشرة.
هل تمانع في جلوسي هنا ؟	بتمانع لو اقعد هون؟	هل تمانع في الجلوس هنا ؟
لقد قمت بزيارة البحيرات الكبرى لأول مرة .	هاي أول مرة بزور البحيرات الكبرى.	هذه هي أول مرة أزور البحيرات الكبرى.
أصبت بالتهاب في الحلق .	التهب حلقي .	التهب حلقي.
نسافر جواً ثلاث مرات في الأسبوع ، أيام الثلاثاء والجمعة والسبت .	بنسافر بالطيارة ثلث مرات بالأسبوع، الثلاثاء، الجمعة والسبت.	نحن نسافر بالطائرة ثلاث مرات في الأسبوع ، الثلاثاء ، الجمعة والسبت.
نعم . أيقظني من النوم بعد ثلاثة ساعات , من فضلك .	أيوة . صحيني من النوم بعد ثلاث ساعات, لو سمحت.	نعم. أيقظني من النوم بعد ثلاث ساعات, من فضلك.
إلى أين يجب علي أن أنقل ؟	لوين لازم أحول؟	إلى أين يجب أن أحول ؟
لا أعرف كثيراً عن النبيذ ؟ ماذا يناسب هذا الطبق ؟	أنا ما بعرف كثير بالواين. شو بنفع مع هاذ الأكل؟	أنا لا أعرف كثيراً بالين. ماذا يصلح مع هذا الطعام ؟
وللشرب ؟ .	بتشرب إشي ؟ .	هل تشرب أي شيء ؟
نعم ، هذا لا يشمل الوجبات .	أيوة، هاذ ما بشمل الأكل.	نعم ، هذا لا يشمل الطعام.
قمة جبل " فوجي " هي اعلي قمة جبلية في اليابان حيث يبلغ ارتفاعها ثلاثة آلاف وسبعمائة وستون مترا .	جبل فوجي هو أعلى قمة باليابان على ارتفاع ثلاثة ألاف وسبعمية وستين متر.	جبل فوجي هو أعلى قمة في اليابان على ارتفاع ثلاثة آلاف وسبعمائة وستين متراً.
هل يمكن أن ترسل أحدا ؟	ممكن تبعت حدا؟	هل يمكنك أن ترسل أحداً ؟
هل من الممكن أن تفصل أكثر ؟	يتقدر توضح أكثر ؟	هل يمكنك أن توضح أكثر ؟
أريد واحدة حديثة .	بدي وحدة جديدة.	أريد واحدة جديدة.
حسنا ، ولكن ليس منطقة المقاعد المكشوفة . فاليوم شديد الحرارة .	طيب ، بس مش على مكان الكراسي المكشوفة. اليوم كثير شوب.	حسناً ، لكن ليس على مكان المقاعد المكشوفة. اليوم كثير من الشواء.
سأرسلها لك ، لذا من فضلك انتظر هنا .	راح أبعثها الك، عشان هيك استنى هون لو سمحت.	سأرسلها لك ، لذلك انتظر هنا من فضلك.
أخشى أن يكون هناك خطأ في الفاتورة .	خايف يكون في غلط بالفاتورة.	أخشى أن يكون هناك خطأ في الفاتورة.
هذا بارد إلى حد ما . هل يمكن أن تقوم بتسخينه ؟	هاظا بارد شوي. ممكن تسخنه؟	هذا بارد قليلاً. هل يمكن أن تسخن هذا ؟
هلا راقبت حقيبتي من فضلك ؟	ممكن تراقبلي شنتي ، لو سمحت؟	هل لك أن تراقب حقيبتي ، من فضلك ؟
لا امتلك أي نقود .	ما معي مصاري.	ليس معي نقود.
أريد عامل تشغيل يتحدث اليابانية من فضلك .	بدي شغيل بيحكي ياباني لو سمحت.	أريد تشغيل يتحدث اليابانية من فضلك.
يبدو أنها نادرة جداً .	شكلها نادرة كثير.	تبدو نادرة جداً.
إنني على يقين أن المجرم قريب .	أنا متأكد إنه المجرم قريب.	أنا متأكد أن المجرم قريب.
أجل ، أظن أني سوف أنظر .	ايوا، بظن إني رح اطلع.	نعم ، أعتقد أنني سأغادر.
هل يوجد أحد يستطيع العزف على البيانو ؟	في أي حدا بعرف يعزف عالبيانو؟	هل يوجد أي شخص يمكنه العزف على البيانو ؟
لستُ معتمداً قانونياً .	أنا مش مؤهل.	أنا غير مؤهل.
هل يمكنك أن توصل أمتعتي إلى الغرفة ؟	ممكن توصل اغراضي للغرفة؟	هل يمكنك أن توصل أمتعتي إلى الغرفة ؟
هل الشوارع الخلفية خطر ؟	الشوارع الخلفية خطرة ؟	هل الشوارع الخلفية خطرة ؟
هل لك أن توقظني في تمام السادسة من فضلك ؟	بتقدر تصحيني الساعة ستة، لو سمحت؟	هل يمكنك أن توقظني في السادسة ، من فضلك ؟
أشعر بحالة سيئة وغثيان .	حاس بلعية ووظعي زفت.	أشعر بألم في المعدة و وظني يزحف.
لقد اتصلت منذ ثلاثة أيام بخصوص حقيبة ضائعة .	اتصلت من ثلاث أيام عشان شنتة ظايعة.	اتصلت منذ ثلاثة أيام للحصول على حقيبة ضائعة.
بضع دقائق أخرى من فضلك .	كم دقيقة كمان اذا سمحت.	كم دقيقة أخرى من فضلك.
لم أدرك الرحلة رقم عشرون المتجهة إلى سان فرانسيسكو .	ما لحقت الرحلة رقم عشرين اللي رايحة عسان فرانسيسكو.	لم ألحق بالرحلة رقم عشرين المتجهة إلى سان فرانسيسكو.
آه ، عندك ؟ بالتأكيد إن لديك تشكيلة كبيرة .	أها، عندك؟ طبعا إنت عندك تشكيلة كبيرة.	أوه ، هل لديك ؟ بالطبع أنت لديك تشكيلة كبيرة.
بطريقة أبطأ ، من فضلك .	بشكل أبطأ ، لو سمحت.	بشكل أبطأ ، من فضلك.
إنه لا يلائمني .	مش مناسبني.	لا يناسبني.
هل من الممكن إجراء اتصال على أن يتم تحصيل أجرته من الطرف الآخر ؟	ممكن أعمل مكالمة وتوخذوا حقها من الطرف الثاني؟	هل يمكن أن أجري مكالمة وتأخذ ثمنها من الطرف الآخر ؟
عندك أية شيء يمكن أن أتعاطه للطفح الجلدي ؟	عندك أي اشي ممكن آخذه عشان هاذ الطفح الجلدي؟	هل لديك أي شيء يمكن أن آخذه بسبب هذا الطفح الجلدي ؟
هل تفضلت و احتسيت القهوة معي ؟	تتفضل و تشرب قهوة معي؟	هل لك أن تزكي لي قهوة معي ؟
سأقوم بتسجيل الدخول في تمام الساعة الثامنة مساءاً تقريباً .	راح أنزل بالفندق حوالي الساعة ثمنية المسا .	سأقيم في الفندق حوالي الثامنة مساءً.
إننا على ارتفاع اثني عشر ألف قدم .	احنا على ارتفاع اتناشر ألف قدم.	نحن على ارتفاع اتناشر ألف قدم.
لقد تمتعت بإقامتي . شكراً لك .	انبسطت بإقامتي . شكراً الك.	استمتعت بإقامتي. شكراً لك.
أُفضلُ حجرة هادئة .	بفظل غرفة هادية.	أفضل غرفة هادئة.
كان يجب تدبير وسيلة مواصلات . ذاهبة إلى بوسطن .	لازم ندبر طريقة أو سيارة رايحة على بوسطن.	يجب أن ندبر وسيلة أو سيارة متجهة إلى بوسطن.
لقد سرق مسجل الفيديو من غرفتي .	سرقو مسجل الفيديو من غرفتي.	لقد سرق مسجل الفيديو من غرفتي.
هذا هو طبقنا المميز , سمك موسى المشوي الخاص بدوفر .	هاذ طبقنا الخاص, سمك موسى المشوي الخاص بدوفر.	هذا طبقنا الخاص, سمك موسى المشوي الخاص بدوفر.
هل يمكن أن أختر جريدة يابانية , من فضلك ؟	ممكن اختار جريدة يابانية، لو سمحت؟	هل يمكن أن أختار صحيفة يابانية ، من فضلك ؟
هل لي أن أقاطعكم ؟	ممكن أقاطعكم؟	هل يمكن أن أقاطعكم ؟
هل يوجد بالقرب من هنا مطعم صيني ؟	في مطعم صيني قريب من هون؟	هل يوجد مطعم صيني بالقرب من هنا ؟
لا أريد أي شيء يكون كبير الحجم .	ما بدي أي اشي ظخم.	لا أريد أي شيء ضخم.
هل أنت الأخير في هذا الصف ؟	إنت الأخير بهاذ الصف؟	هل أنت الأخير في هذا الصف ؟
إن محفظتي نشلت في القطار .	وحدة سرق محفظتي في القطر.	واحدة سرق محفظتي في القطر.
