# Supplementary material for: Exploring prompting for dialectical machine translation: a focus on north Jordanian Arabic
Source: PeerJ journal article supplement (doi:10.7717/peerj-cs.3209), 2025-11-12
Supplement: Code.zip [file AraT5_base_1024_prediction.xlsx]

## Sheet: Sheet1
MSA	IrbidDial	T5
ما رأيك في مشاهدة فيلم آخر ؟	شو رأيك نشوف فيلم ثاني؟	شو رأيك تشوف فيلم ثاني؟
أريد كوبا من الماء لأتناول بعض الدواء , من فضلك .	بدي كاسة مي عشان اوخذ الدوا، لو سمحت.	بدي كاسة مي عشان اشرب دوا, لو سمحت.
أبغي كرة .	بدي طابة.	بدي كرة.
كيف تحب أن يصفف شعرك اليوم ؟	كيف بدك يسرحلك شعرك اليوم؟	شلون بتحب تصفف شعرك اليوم؟
أريد رداءا ذات أكمام طويلة .	بدي جاكيت كم طويل.	بدي جاكيت اكمامه طويلة.
ها-ها . صباح الخير حان دورك . إنه على ما يرام .	هههه. صباح الخير صار دورك. هو كويس.	ها-ها. صباح الخير، راح دورك. تمام.
أين نتقابل ؟	وين بدنا نتلاقى؟	وين نتقابل؟
لقد أثلج صدري زيارة مقاركم الرئيسية وكذا ما جرى بيننا من مناقشات مهمة . شكراً جزيلاً على ما أبديتموه من تعاون .	فرحت كتير لما زرت مكاتبكم الرئيسية وكمان النقاشات الهمة اللي صارت بيناتنا. كتير شكراً على العون اللي قدمتوه.	انبسطت بشوفتك وزي ما صار بيننا من مناقشات مهمة. شكراً كثير على ما عملتموه من تعاون.
هل هذا قطار مباشر ؟	هاذ القطار مباشر؟	هاد القطار مباشر؟
إبريق من القهوة ، لطفاً .	بكرج قهوة، لو سمحت.	بدي كاسة قهوة، لو سمحت.
كم تكلفة الإفطار ؟	بقديش الفطور ؟	قديش سعر الفطور؟
من فضلك اختر لي مائدة ذات منظر ليلي لطيف .	من فظلك إختارلي طاولة مع منظر حلو بالليل.	لو سمحت اخترلي طاولة شكلها حلو بالليل.
أين الحلاق ؟	وين الحلاق؟	وين الحلاق؟
الشاطئ أسفل يمينا . ياله من منظر رائع .	الشط تحت على اليمين. شو المنظر بجنن.	الشاطئ تحت يمين. منظر حلو.
كلاً ، إنهم متينين جداً .	لا، هظول كثير قويات.	لا، هم كثير متينين.
اتجه يسارا عند الناصية الثالثة .	روح يسار من عند الدخلة الثالثة .	روح يسار عند الشارع الثالث.
أين المحطة النهائية للحافلة ؟	وين اخر موقف للباص؟	وين المحطة الأخيرة للباص؟
كم يتقاضى المرشد في اليوم ؟	قديش بيوخذ الدليل باليوم؟	قديش بتوخذ المرشد باليوم؟
أريد كيساً من الفشار ، من فضلك .	بدي كيس بوشار، لو سمحت.	بدي كيس فشار، لو سمحت.
من فضلك غير خمسين آلاف ين إلى دولارات أمريكية .	لو سمحت اصرف الخمسين ألف ين لدولر أمريكي.	لو سمحت غير خمسين ألف ين لدولارات أمريكية.
أريد قاموس جيب ، من فضلك .	بدي قاموس بنحط بالجيبة ، لو سمحت.	بدي قاموس جيب ، لو سمحت.
من فضلك ، أريد فنجاناً من القهوة البيضاء .	لو سمحت ، بدي فنجان قهوة بالحليب.	لو سمحت ، بدي فنجان قهوة أبيض.
هل يمكن أن أحصل على قمصاني نظيفة غداً صباحاً ؟	ممكن ألاقي قمصاني نظيفات بكرا الصبح؟	ممكن أجيب قمصان نظيفة بكرا الصبح؟
حسنا , حجرتك يا آنسة هي رقم تسعة صفر ثمانية . هذا مفتاحك .	طيب، غرفتك يا آنسة هي تسعة صفر ثمنية. هاذ مفتاحك.	تمام, غرفتك يا آنسة هي رقم تسعة صفر ثمنية. هاظ مفتاحك.
نعم ، بالطبع .	أيوا، أكيد.	اه، اكيد.
ما تكلفة المقاعد الخاصة بالشرفة ؟	قديش بتكلف الكراسي تبعت البرندة؟	قديش بتكلف الكراسي الخاصة بالشرفة؟
هل لي بدليل سياحي ؟	ممكن مرشد سياحي؟	ممكن دليل سياحي؟
أجل ، وأودّ محاسبة المطلوب هاتفياً على قيمة المكالمة .	صح، وأنا بدي احاسب يلي رنيت عليه على حق المكالمة.	أه ، بدي أحاسب اللي بده يتصل على قيمة المكالمة.
جلد التمساح الأمريكي .	جلد التمساح الأمريكي.	جلد التمساح الأمريكي.
سأكون هنا الساعة الثامنة إلى الربع .	رح أكون هون الساعة ثمانية إلا ربع.	رح أكون هون الساعة ثمنية للربع.
أظن أن الملابس المصنوعة في اليابان قد جرى تفصيلها على نحو أفضل بالتأكيد .	بتوقع انو الأواعي اللي صنعت في اليابان تفصلت بطريقة أحسن أكيد.	بتوقع انه الأواعي المصنوعة باليابان فصلت أحسن أكيد.
سأكون هناك حوالي السادسة مساءً .	راح أكون هناك حوالي الساعة ستة المسا.	رح أكون هناك تقريبا الساعة ستة المسا.
لا أجيد الإنجليزية . هل ثمة من يتحدث اليابانية هنا ؟	أنا مش بعرف أحكي إنجليزي. في حدا بحكي ياباني هون؟	ما بعرف إنجليزي. في حدا بحكي ياباني هون؟
إنني أتصل من كشك عمومي في ماسي .	أنا بحكي معك من كشك عام بماسي.	أنا برن من كشك عام في ماسي.
كم الوقت ؟	قديش الساعة؟	قديش الوقت؟
إنني أبحث عن هذا .	أني بدور على هاظ.	بدور على هاظ.
لماذا لا تعطيها هدية ؟	ليش ما تعطيها هدية؟	ليش ما عطيتها هدية؟
استمتعنا بالعشاء .	كيفنا عالعشا.	انبسطنا بالعشا.
سأذهب بك على مقعدك . من هنا ، من فضلك .	راح اوديك على كرسيك. من هون، لو سمحت.	رح أروحلك على كرسيك. من هون، لو سمحت.
سأعود إليك عندما تكون أقل انشغالاً .	راح أرجعلك بس تكون مش مشغول كثير.	رح أرجعلك لما تكون مشغول.
أنا السيد تكاهاشي بالغرفة رقم خمسة تسعة وأربعين . من فضلك أرسل أربع زجاجات من بيرة بودفايزر .	أنا الأستاذ تكاهاشي بالأوضة رقم ٥٩ . لو سمحت بدي أربع بطولين من البيرة بودفايزر.	أنا تكاهاشي بالغرفة رقم خمسة تسعة وأربعين. لو سمحت ابعث أربع قناني بيرة بودفايزر.
حسنا ، إنه وقت الغداء . هل تحب أن نناقشه على الغداء ؟	ماشي، وقت الاكل صار. بتحب نحكي عنها واحنا ناكل؟	تمام، هاد وقت الغدا. بتحب نحكي معه على الغدا؟
هناك الكثير من الينابيع الحارة .	في كثير ينابيع حارة.	في كثير ينابيع حارة.
سر مباشرة ، من فضلك .	روح ع طول، لو سمحت.	امشي مباشرة ، لو سمحت.
هل تمانع إذا التقطت صورة لك ولسيارتك الأجرة ؟	بتمانع لو أخذت صورة إلك وللتكسي تبعتك؟	عندك مانع اذا صورتلك و لساترك ؟
كم من الوقت نحتاج للذهاب مشياً من هنا إلى مبنى البلدية ؟	قديش بدنا وقت عشان نمشي من هون لبناية البلدية؟	قديش بدنا وقت نروح مشي من هون لبناية البلدية؟
هل تستطيع أن تخفض سعرها لوجود بعض البقع بها ؟	بتقدر ترخصها لأنه في عليها شوية بقع؟	بتقدر تخفض سعرها لوجود بقع فيها؟
شكراً ، هذا يكفي .	شكراً ، هاظ بكفي.	شكراً ، هاظ يكفي.
أريد الشخص الذي يعد وثائق عادية في حجم ورقة الخطاب بدون الحاجة إلى طيهم .	بدي الشخص اللي بعمل الوثائق اللي بحجم الورق العادي بدون ما يظطر يثنيهم.	بدي واحد بجهز وثائق عادية بحجم ورقة الخطاب بدون ما طيهم.
هل نحتاج إلى طرح هذا للتصويت ؟ إن لم نكن في حاجة إلى هذا ، فإمكاني أن أعتقد حينئذ أننا قد وصلنا إلى نتيجة , سأقوم بإرسالها إلى مجلس إدارتنا صباح غد .	هل احنا محتاجين نحط هاظ للتصويت؟ اذا لأ، بتوقع أنه وصلنا للنتيجة، بدي أبعثها لمجلس ادارتنا بكرا الصبح.	بدنا نطرح هاظ للتصويت؟ اذا ما كنا محتاجين هاظ، بقدر اتوقع انه وصلنا لنتيجة, رح ارسلها على مجلس ادارتنا بكرة الصبح.
أين مترو الأنفاق ؟	وين المترو؟	وين مترو الانفاق؟
كنت أفكر في الحصول على هذه الدورة في فترة نصف العام المقبلة .	كنت بفكر أوخذ هالكورس بفترة نص السنة الجاية.	كنت بفكر اخد هاي الدورة بنص السنة الجاي.
الخامس عشر من سبتمبر يوم احترام المسنين .	خمسطعش تسعة هو يوم احترام المسنين.	خمسةطعش من شهر تسعة يوم احترام المسنين.
ارفعوا أيديكم .	ارفعوا إيديكو	ارفعوا ايديكم.
أين موقف الحافلات ل بي ؟	وين مجمع الباصات ل بي ؟	وين موقف الباصات ل بي؟
قم بدفعها من فضلك , إن كان ذلك ممكنا .	لو سمحت دزها , إذا بصير	ادفعها لو سمحت, اذا كان ممكن.
لقد نسيت أن آخذ حقيبتي اليدوية .	نسيت آخذ شنتة الإيد.	نسيت آخذ شنتتي اليدوية.
فكرة صائبة . متى تخطط للمجيء ؟	فكرة صحيحة. متى بتنوي تيجي؟	فكرة صحيحة. متى بدك تيجي؟
اثنان ويسكي مع الماء , من فضلك .	تنين ويسكي مع مية, لو سمحت.	ثنين ويسكي مع المي, لو سمحت.
على فكرة , هل أنت غير مشغول السبت القادم ؟	بالمناسبة، راح تكون فاضي السبت الجاي؟	على فكرة, انت مش مشغول السبت الجاي؟
هل لديك هذا باللون الأخضر الداكن ؟	عندك هاذ باللون الاخضر الغامق؟	عندك هاظ باللون الأخضر الداكن؟
هالو ، هل هذه تعود إلى روي ؟	مرحبا، هاي لروي؟	مرحبا، هاي بترجع لروي؟
أريد حامل ثلاثي .	بدي حامل ثلاثي.	بدي حامل ثلاثي.
عظيم . كنت أبحث عن سيارة أجرة لكن هذا أفضل .	كتير حلو. كنت قاعد بدور على تاكسي بس هاي احسن.	ممتاز. كنت بدور على تكسي بس هاظ أحسن.
ثلاثة اثنان واحد اثنان . انتظر ثانية ، حسنا ؟ أريد أن أرسل لك شيئاً هنا . معذرة .	ثلاثه اثنين واحد اثنين. استناني شوي , طيب؟ بدي أبعثلك اشي هون. اعذرني.	ثلاث اثنين واحد اثنين. استنى مرة ثانية، طيب؟ بدي ابعثلك اشي هون. معذرة.
حسنا ، إنه باهظ الثمن . إنه لم يصنع في اليابان ، أليس كذلك ؟	تمام ، هو غالي .اكيد مش صنع اليابان، مش؟	ماشي، هو غالي. ما صنعه باليابان، صح؟
ويسكي اسكتلندي وماء من فضلك .	ويسكي اسكتلاندي ومية لو سمحت.	ويسكي اسكتلندي و مي لو سمحت.
هل توجد أية كازينوهات جيدة ؟	في أي كازينوهات حلوة؟	في كازينوهات كويسة؟
إنها عاملتني كما لو كنت متسولاُ .	عاملتني كإني شحاد.	هي عاملتني زي ما كنت متسول.
شخص ما فتح الطرد الخاص بي .	في حد فتح الطرد تبعي.	شخص فتح الطرد تبعتي.
هل تريد أن افحص موتور السيارة ؟	بدك ياني أفحص ماتور السيارة؟	بدك افحص موتور السيارة؟
أنا في نزهة طويلة سيرا على الأقدام .	أني طالعة برحلة طويلة تمشاية عجري.	أنا برحلة طويلة مشي على الأقدام.
هذه الأيام ، استخدم الكمبيوتر بشكل دائم في العمل .	هاي الأيام ، أنا بستخدم الكمبيوتر دايماً بالشغل.	هاي الأيام، استخدم الكمبيوتر بشكل دائم بالشغل.
موظفو المبيعات في هذا المتجر لطفاء جداً .	موظفين المبيعات بهاذ المحل لطيفين كثير.	موظفين المبيعات بهاد المحل كثير طيبين.
الثاني من على اليسار .	الثاني عالشمال .	الثاني عاليسار.
هل أنزل هنا لمركز روكفيلر ؟	أنزل من هون عمركز روكفيلر؟	نزل هون لمركز روكفيلر؟
هذه السيدة كاوازو في غرفة رقم ستة عشر أحدى عشر .	هاي الست كاوازو بالغرفة سطعش إحدعش.	هاي السيدة كاوازو بالغرفة رقم ستة عشر أحدعش.
هل تستطيع خفضها حتى عشرين دولار ، من فضلك ؟	بتقدر تنزلها لعشرين دولار، لو سمحت؟	بتقدر تخفضها لعشرين دولار، لو سمحت؟
أشعر بتحسن .	حاس بتحسن.	حاس بتحسن.
هل يمكنكم صرف الشيك ذو المائتي دولار الخاص بي ؟	بتقدروا تصرفولي الشيك أبو الميتين دولر تاعي؟	بتقدروا تصرفوا الشيك الي المييت دولار ؟
ولكن لا ضرورة لدفع بقشيش .	بس ما في داعي للبخشيش.	بس ما في داعي تدفع بقشيش.
لقد جاء لتوه .	جا هسا.	اجى هسا.
لنتصل به .	خلينا نرلنه.	خلينا نحكي معه.
بالمناسبة ، اسمي هيروش إيجيما .	بالمناسبة، اسمي هيروشي ايجيما.	بالمناسبة، إسمي هيروش إيجيما.
التاسع والعشرون من أغسطس .	تسعه وعشرين من آب.	تسعة وعشرين من شهر ثمانية.
هل لا زال لديكم مقاعد لعرض الليلة ؟	ظل في عندكم محلات لعرض الليلة؟	عندكم مقاعد لعرض الليلة؟
أريد القيام بحجز للساعة الثالثة والنصف ظهراُ .	بدي أعمل حجز للساعة ثلاثة ونص الظهر.	بدي احجز الساعة ثلاث ونص الظهر.
سوف نحضرها الآن . ما هو رقم غرفتك ؟	رح نجيبها هلا . شو رقم غرفتك ؟	رح نجيبها هسا. شو رقم غرفتك؟
رقم غرفتي هو ثلاثة ستة وعشرين . هل يمكن أن تأخذ الغسيل ؟	رقم غرفتي هو ثلاثة ستة وعشرين. بصير توخذ الغسيل؟	رقم غرفتي ثلاثة ستة وعشرين. بتقدر توخذ الغسيل؟
أليس لديك دروس تجريبية ؟	ما عندك كورسات تجريبية؟	ما عندك دروس تجريبية؟
رحلة الطيران دلتا رقم ثمانية وعشرون والمتجهة إلي نيو أورلينز سوف تتأخر حوالي ساعة .	رحلة الطيارة دلتا رقم ثمانية وعشرين اللي رايحة على نيو أورلينز حتى تتأخر حوالي ساعة.	رحلة الطيران دلتا رقم ثمانية وعشرين اللي رايحة على نيو أورلينز رح تتأخر حوالي ساعة.
هل لديكم غرفة متاحة الليلة ؟	عندكم غرفة فاضية الليلة ؟	عندكم غرفة فاضية الليلة؟
بصراحة ، لا أتفق مع ذلك .	بصراحة، ما بتفق مع هاظ.	بصراحة، مش متفق مع هاظ.
هل لك أن تتفضل وتملأ هذه ؟	بتقدر تتكرم و تعبي هاي؟	ممكن تتفضل تعبي هاي؟
يبدو أن النقود التي أعطيتني إياها ناقصة عشر دولارات .	شكله المصاري اللي إنطيتني اياها ناقصة عشر دولارات.	شكله المصاري اللي أعطيتك إياها ناقصة عشر دولارات.
بالخارج .	برا.	برا.
أريد ما يخصني لكي أرحل .	بدي اللي بخصني مشان أروح.	بدي اللي يخصني عشان أروح.
هل يمكن أن ترسلها إلى عنواني في اليابان عن طريق بريد الطرود الدولي وتحصل الثمن من هناك ؟	ممكن توديها على عنواني باليابان عن طريق صفحة الطرود الدولي و توخذ حقه من هناك ؟	بتقدر تبعثها على عنواني باليابان عن طريق بريد الطرود الدولي و تاخد حقها من هناك؟
أين قسم السيدات ؟	وين قسم النسوان؟	وين قسم السيدات؟
إنه ألم حاد .	هو وجع قوي.	هاد وجع قوي.
إنني في نفس السن .	أني بنفس العمر.	أنا بنفس العمر.
فكرة جميلة .	فكرة حلوة.	فكرة حلوة.
هل الأجانب يمكنهم الحصول على الكتب في المكتبة ؟	بقدروا الأجانب يستخدموا الكتب بالمكتبة؟	الأجانب بقدروا ياخدوا الكتب بالمكتبة؟
تحية . أنا جون .	مرحبا. أني جون.	تحية. أنا جون.
هل يمكن أن نبدأ اللعب عندما ينتهون ؟	بنقدر نبلش نلعب لما يخلصوا؟	ممكن نبلش اللعب لما يخلصوا؟
مائة وخمسة وثلاثون ين للدولار الواحد .	مية وخمسة وثلثين ين للدولار الواحد.	مية وخمسة وثلاثين ين للدولار الواحد.
نعم . انتظر , سوف احضر لك واحدة .	طيب. استنى، راح أجيبلك وحدة.	اه. استنى, راح اجيبلك وحدة.
هلا أنزلتني عند فندق هلتون من فضلك ؟	ممكن تنزلني عند فندق الهيلتون لو سمحت؟	ممكن تنزلني عند فندق هلتون لو سمحت؟
أين الاستعلامات الرياضية ؟	وين الاستعلامات الرياضة؟	وين الاستعلامات الرياضية؟
هذه هي فلوس أقلام الحبر . فاتورة بمائة دولار .	هايذ حق قلام الحبر. فاتورة بمية دولار.	هاي فلوس أقلام الحبر. فاتورة بمية دولار.
لا ، شكراً . من الأفضل أن لا أشرب المزيد .	لا، شكراً. احسنلي ما أشرب اكثر من هيك.	لا، شكراً. أحسنلك ما أشرب أكثر.
بما في ذلك الإفطار ، والضريبة ، ورسم الخدمة ، سيكون الحساب خمسة أربعون دولارا للشخص الواحد في الليلة .	بتشمل الفطور، الضرايب، ورسم الخدمة، الحساب رح يكون خمسة وأربعين دولار للواحد في الليلة.	بما في ذلك الفطور ، والضريبة ، ورسم الخدمة ، رح يكون الحساب خمسة أربعين دولار للشخص الواحد بالليلة.
ما عرض الأوبرا اليوم ؟	شو عرض الأوبيرا اليوم؟	شو عرض الأوبرا اليوم؟
أريد مقعداً يطل على الممر ، من فضلك .	بدي كرسي يطل عالممر، لو سمحت.	بدي كرسي يطل على الممر، لو سمحت.
أجل أريد شيئاً أقرؤه .	أيوا بدي إشي أقراه.	أه بدي إشي أقرأه.
غير محتمل بدرجة كبيرة .	بنطاقش بدرجة كبيرة.	مش محتمل كثير.
هل تعرف المطعم يا كيويا ؟	بتعرف المطعم يا كيويا؟	بتعرف المطعم يا كيويا؟
يستطيع الصرافون أن يغيروا دولاراتك من أجل بقشيش الكازينو . هل نذهب ؟	السمسارين بقدروا يصرفولك الدولرات عشان بخشيش الكازينو. بصير نروح؟	الصرافين بصير يغيروا دولاراتك عشان بقشيش الكازينو. نروح؟
يسعدنا أن نقدم لك الشراب الذي تريده متبوعاً بالغداء . دليل كامل بالمشروبات التي نقدمها على رحلتنا موجودة في دليل المعلومات الخاص بمجلتنا .	بسعدنا إنه نقدملك العصير اللي بتختاره وبيلحقه الغدا . منوفر قائمة كاملة من الشراب في هاي الرحلة موجودة بقسم المعلومات تاع مجلتنا.	يسعدنا ان نقدملك الشراب يلي بدك اياه قبل ما تفطر. دليل كامل بالمشروبات اللي بنقدمها على رحلتنا موجود بدليل المعلومات الخاص بمجلتنا.
هل أستطيع تأجير أداة للتنفس أثناء السباحة ؟	بقدر أستأجر شغلة للتنفس خلال السباحة؟	بقدر أأجر دوا تنفس عشان السباحة؟
آه . هل يمكنني الحصول على وجبتي فيما بعد ؟ أنا أشعر أنني لست على ما يرام الآن .	ممم. ممكن أخد وجبتي بعدين؟ حاسس حالي مش على بعضي هسا.	آه. بقدر أجيب وجبتي بعدين؟ أنا حاس حالي مش كويس هسا.
ما هو رقم الرحلة الجوية ؟	شو رقم رحلة الطيران؟	شو رقم الرحلة الجوية؟
أبغي تأجير سيارة من هذا الطراز لمدة يومين .	بدي استأجر سيارة من هاذ الموديل لمدة يومين.	بدي أستأجر سيارة من هالنوع لمدة يومين.
أنا غير متأكد إذا كنت قد حزمت ملابس كافية لرحلة مدتها ثلاثة أيام .	أنا مش متأكد اذا جهزت وعية بتكفيني لرحلة مدتها ثلاث أيام.	أنا مش متأكد إذا كنت حزمت أواعي كافية لرحلة مدتها ثلاث أيام.
يوجد بجانب هذا المبني تحديداً .	هو جنب هاذ المبنى بالتحديد .	في جنب هالمبنى بالزبط.
هه . هذه . يبدو اللون جميلاً عليك .	هه. هاي. شكل اللون حلو عليك كثير.	اه. هاي. مبين اللون حلو عليك.
هل أستطيع تناول غذائي الآن ؟	ممكن أوكل هسا؟	بقدر اخد اكل هسا؟
هل يتوقف القطار في برايتون ؟	بوقف القطار عند برايتون؟	القطار بوقف برايتون؟
من المهم جدا أننا نستطيع الوصول إلى المواد الخام التي نحتاجها في المشروع .	اشي كثير مهم إنه قدرنا نوصل لمجموعة المواد الأساسية اللي راح نحتاجها للمشروع.	مهم كثير انه نقدر نوصل للمواد الخام يلي بدنا اياها بالمشروع.
أود أن أطلب بدلة داكنة من أجلي .	بدي أطلب بدلة لونها غامق عشاني.	بدي اطلب بدلة غامقة عشاني.
هذا جيد . متى هو ؟	هيك تمام. متى رح يكون؟	هاظ كويس. متى هو ؟
أرغب في شراء شامبو .	أنا بدي أشتري شامبو.	بدي اشتري شامبو.
خمسون جنيهاً .	خمسين قنيه.	خمسين جنيه.
لا يوجد رسم ضروري .	مش موجود رسم ظروري.	ما في رسم ضروري.
هل كان لديك أية خدمات أخرى إلى جانب طعام الإفطار هذا الصباح ؟	في عندك أي خدمات ثانية غير فطور الصبح؟	كان عندك خدمات ثانية مع الفطور الصبح؟
متى يفتح المصرف ؟	أميت بفتح البنك؟	متى بفتح المصرف؟
إجمالي المبلغ المطلوب مائتان وثلاثة وأربعون جنيه ، يا سيدتي .	المبلغ الكلي بطلع ميتين وثلاثة وأربيعين جنيه، يا مدام.	إجمالي المبلغ المطلوب ميتين وثلاثة وأربعين جنيه ، يا ستي.
لماذا لم يأت إلى الحفلة أمس ؟	ليش ما اجى على الحفلة امبارح؟	ليش ما اجا الحفلة مبارح؟
أريد لفتان من ISO مائة ، فيلم ملون ، ستة وثلاثين لقطة ، من فضلك .	بدي لفتين أيزو مية، فلم ملون، ستة وثلاثين لقطة ، لو سمحت.	بدي لفتين من ISO مية ، فيلم ملون ، ستة وثلاثين لقطة ، لو سمحت.
هل لديك مرآة ؟	عندك مراية؟	عندك مرآة؟
هل من المقبول عدم اتباع أي شخص لتعليمات الأمن ؟	بصير حدا ما يتبع تعليمات الأمن؟	ممكن ما يلتزم أي حدا بتعليمات الأمن؟
علىّ أن ألحق بطائرة العاشرة صباحاً .	لازم ألحق طيارة الساعة عشرة الصبح.	لازم ألحق بالطيارة العاشرة الصبح.
من اين يمكنني الحصول على مسكوكة لركوب المترو ؟	من وين ممكن أجيب تذكرة لأركب المترو؟	من وين بقدر أجيب مسكوكة عشان اركب المترو؟
أين يمكنني تغير نقودي ؟	وين بقدر أصرف مصاريي؟	وين بقدر أغير مصاري؟
هل بها جهاز تدفئة ؟	بيها جهاز تدفئة؟	فيها جهاز تدفئة؟
أريد بعض الكريم الليلي .	بدي كريم ليلي.	بدي شوية كريم ليلي.
كم تتقاضى ثمنا لإرسالها لليابان ؟	قديش بدك توخذ عشان تبعثها على اليابان؟	قديش بتوخذ حق عشان تبعثها لليابان؟
أكيدا التي تتحدث معك ، أنا عندي حجز مائدة في تمام الساعة السادسة والثلث هذا المساء . ولكني آسفة لأني سأصل متأخرة نصف ساعة .	أكيدا يلي بتحكي. عندي حجز طاولة عالساعة ستة و ثلث المسا. بس آسفة لإني رح أوصل متأخرة نص ساعة.	أكيدا اللي بتحكي معك، أنا عندي حجز طاولة الساعة ستة و ثلث المسا. بس أنا آسف لأني رح أوصل متأخر نص ساعة.
متي سنستقل القارب ؟	متى بدنا نركب القارب؟	متى رح نركب القارب؟
أرغب في غرفة بحمام .	بدي غرفة بحمام.	بدي غرفة بحمام.
معذرة , متي ينتهي هذا الفيلم ؟	عفواً, متى بخلص هذ الفلم؟	معلش, متى رح يخلص هاد الفلم؟
لقد تمكنت من تحقيق ذلك .	قدرت أوصل لهذا الشي.	نجحت فيه.
هل هو طريق طويل ؟	هو الطريق طويل؟	هو طريق طويل؟
ما هي الأنواع التي لديكم ؟	شو الأنواع اللي عندكم؟	شو الأنواع اللي عندكو؟
سأرتبك . هل تمانع في رسم خريطة لي ؟	رح أرتبك. ما عندك مشكلة ترسملي خريطة؟	رح أتخبط. عندك مشكلة ترسملي خريطة؟
لدينا جمبري رائع جداً اليوم .	عنا جمبري مميز كثير اليوم.	عنا جمبري كثير ممتاز اليوم.
هل لديك أيّ خرائط بسيطة للمدينة ؟	عندي أي خرايط بسيطة للمدينة؟	عندك خرائط بسيطة للمدينة؟
معذرة أريد الذهاب إلى فندقي في المدينة بالحافلة . أين يمكن أن أستقل حافلة ؟	عفواً، أنا بدي أروح على الفندق موجود بالمدينة بالباص. من وين بقدر آخذ باص؟	معلش بدي اروح على فندقي بالمدينة بالباص. وين بقدر أركب باص؟
شكراً . لكنني لا أعتقد أن عندي وقت للإقامة لمدة ليلتين . هل يمكنك حجز غرفة بسريرين لي في ذلك الفندق ليلة الثاني عشر من مارس فقط ؟	شكراً ، بس ما بتوقع أنه معي وقت عشان أظل ليلتين. ممكن تحجزلي غرفة مزدوجة في الفندق لليلة اثنعش ثلاث بس؟	شكرا. بس ما بظن اني عندي وقت أسكن ليلتين. بتقدر تحجزلي غرفة بسريرين بهاد الفندق ليلة إثنعش من شهر ثلاث بس ؟
بالتأكيد . كيف يمكننا خدمتك ؟	أكيد. كيف منقدر نخدمك؟	أكيد. كيف بنقدر نخدمك؟
شيكات سياحية . شكراً . خذ تذكرتك وبطاقة المرور للصعود على متن الطائرة . كن هناك قبل وقت الرحلة بساعة من فضلك .	شيكات سياحية. شكراً. أخذ تذكرتك و الفيزا عشان تطلع على الطيارة. كون هناك قبل الرحلة بساعة لو سمحت.	شيكات سياحية. شكراً. خذ تذكرتك وبطاقة المرور للصعود على الطيارة. كن هناك قبل وقت الرحلة بساعة لو سمحت.
أوافق . يجب أن تصبح طبيعية جداً .	أنا موافق. لازم تصير طبيعة كثير.	أنا موافق. لازم تصير طبيعية كثير.
أهذه عيادة إف ؟	هاي عيادة إف؟	هاي عيادة إف؟
هل لك أن تغيرهم إلى دولارات من فضلك ؟	ممكن تحولي اياهم لدولارات، لو سمحت؟	ممكن تغيرهم لدولارات لو سمحت؟
حسناً . أراك الساعة الثانية يوم الأحد .	تمام . بشوفك الساعة ثنتين يوم الأحد.	تمام. اشوفك الساعة ثنتين يوم الأحد.
هل يمكنك أن تشذب شاربي ؟	ممكن لو سمحت ترتبلي شواربي؟	بتقدر تشذب شاربي؟
أود أن أصرف هذا الشيك بسبعين دولاراً .	بدي أصرف هاذ الشيك بقيمة سبعين دولر.	بدي اصرف هاد الشيك بسبعين دولار.
الجزء المكتوب بالطريقة المائلة يشير إلى التغييرات التي حدثت في التسعينات .	الجزء اللي مكتوب بالطريقة المايلة بدل على التغييرات اللي صارت بالتسعينات.	الجزء المكتوب بطريقة ميل يشير للتغييرات اللي صارت في التسعينات.
هل تشمل هذه الرحلة زيارة لبرج سيرز ؟	بتشمل هاي الرحلة زيارة لبرج سيرز؟	هاي الرحلة فيها زيارة لبرج سيرز؟
أين ستنتهي الجولة ، ومتى ؟	وين راح تخلص الرحلة، و أميت؟	وين رح تخلص الجولة، ومتى؟
تفضل هذان دولاران . احتفظ بالباقي .	تفظل هي دولرين. خلي الباقي إلك.	تفضل هدول دولارين. خلي الباقي عندك.
هل يوجد أي محل متعدد الأقسام قريب من هنا ؟	في أي مول قريب من هون؟	في محل متعدد الأقسام قريب من هون؟
هل ستزال تعمل جدول المواعيد ؟	هل رح تظل جدول المواعيد شغّالة؟	رح تضل تعمل جدول المواعيد؟
سوف آخذ هذه ، من فضلك .	راح آخذ هاظ ، لو سمحت.	راح اوخذ هاي، لو سمحت.
يقولون أن اليابان دولة غنية جداً .	بقولوا أنه اليابان بلد غني.	بقولو إن اليابان دولة غنية كثير.
ملعقتين , من فضلك .	معلقتين , لو سمحت.	ملعقتين, لو سمحت.
أجل ، واحدة فقط . متى سأعرف ؟ وكيف سيتم تعويضي ؟	أها، بس وحدة؟ متى رح أعرف؟ وكيف رح يكون التعويض؟	أه ، وحدة بس. متى رح أعرف ؟ وكيف رح أعطيك ؟
هناك ، أمام بيانات السائح تماما .	هناك ، قدام بيانات السايح بالزبط .	هناك، قدام بيانات السائح بالزبط.
أين أجد الاسطوانات المدمجة ؟	وين بلاقي السيديات؟	وين بلاقي الاسطوانات المدمجة؟
أنا متأثر للغاية , لا أستطيع البقاء ساكنا .	أنا متأثر كتير, ما قادر أضل ساكت.	أنا متأثر كثير, مش قادر أظل ساكن.
هل هو قريب لنصل إليه سيراً .	هو قريب عشان نوصلو مشي؟	هو قريب حتى نوصلله مشي؟
إني من إسبانيا .	أنا من إسبانيا.	أنا من إسبانيا.
ـ أين أقرب محل جزارة ؟	وين أقرب لحام؟	وين أقرب محل جزارة؟
أود تأجير هذا الطراز من السيارات لمدة أربعة وعشرين ساعة .	بدي أستأجر هاذ الموديل من السيارات لمدة أربع وعشرين ساعة.	بدي أأجر هاظ النوع من السيارات لأربعة وعشرين ساعة.
لا يمكن أن أبيع هذه دون روشتة .	ما بقدر أبيع هاي بدون وصفة طبية.	ما بقدر أبيع هاي بدون روشيتة.
هل لديك صحف يابانية ؟	عندك جرايد يابانية؟	عندك جرايد يابانية؟
هل هذا الحذاء متين ؟	هاذ البوط قوي؟	هاظ الكندرة متين؟
لكنّي لدى موعد لرؤيتها في السّاعة الثّانية .	بس أنا عندي موعد عشان أشوفها الساعة ثنتين.	بس عندي موعد اشوفها الساعة ثنتين.
هل لديك غرف أكبر ؟	عندك غرف أكبر؟	عندك غرف أكبر؟
اعطني عامل التليفون من فضلك .	إعطيني عامل التلفون لو سمحت .	أعطيني عامل التلفون لو سمحت.
ظننت أنكم أيها الشباب تأكلون الكعك المخبوز فقط .	فكرت إنكو يا شباب بتوكلوا الكعك المخبوز بس.	توقعت انكم الشباب بتاكلوا الكعك المخبوز بس.
أريد استئجار كرسي مركب .	بدي أستأجر كرسي اتمدد عليه.	بدي أستأجر كرسي مركب.
أنا أبحث عن شيء أنيق .	أني بدور على اشي لايق.	أنا بدور على إشي أنيق.
حسناً . هل يجب أن أقوم بتركيزها ؟	ماشي. لازم أساويها مركزة؟	ماشي. لازم أركزها؟
قهوة مع القشدة والسكر ، من فضلك .	قهوة مع القشطة والسكر، لو سمحت.	قهوة مع القشطة والسكر، لو سمحت.
سوف ننتظر . من فضلك اتصل بنا عندما تكون مستعداً .	رح نستنى . لو سمحت, إتصل فينا لما تكون جاهز.	رح نستنى. لو سمحت رن علينا لما تكون جاهز.
فقط سياحة .	بس للسياحة.	بس سياحة.
أحتاج إلى طيب .	بدي دكتور.	بدي طيب.
إن الجونلات القصيرة ومعها الأحذية الطويلة لن تنقضي موضتها .	مش ممكن تخلص موضة التنانير القصيرة مع الجزم الطويلة.	الجونلات القصيرة ومعها الاحذية الطويلة ما رح تنقضي موضتها.
ألا ترغب في فنجان شاي ؟	ما بدك تشرب كاسة شاي؟	ما بدك فنجان شاي؟
ليس تماماً . فقط شيء ما غير غالي الثمن .	مش هيك. بس إشي مش غالي.	مش هيك. بس اشي مش غالي.
إذا كنت تودّ ، بإمكاننا الاستراحة هنا .	إذا إنت حاب، ممكن نستريح هون.	إذا بدك، بنقدر نستنى هون.
هل هذه كلها هي حقائبك ؟	هاي كلها شناتيك؟	هاي كلها شناتيك ؟
هل تريد بالحلويات ؟	بدك حلويات؟	بدك حلويات؟
نعم ، لكن ليس قويا جدا .	اه ، بس مش قوي كثير.	اه ، بس مش قوي كثير.
ويسكي وماء ، من فضلك . هل لديكم وجبة خفيفة معه ؟	ويسكي ومي، لو سمحت. عندكم سندويشة صغيرة او شيء خفيف معه؟	ويسكي و مي ، لو سمحت. عندكم وجبة خفيفة معه ؟
أتعرف كاثي ؟ إنه عيد ميلادها .	بتعرف كاثي؟ هاي حفلة عيد ميلادها.	بتعرف كاثي؟ هاي عيد ميلادها.
أود تحميض هذا الفيلم . متي سيكون جاهزا ؟	بدي أحمض هالفلم. متى رح يكون جاهز؟	بدي احمض هاد الفلم. متى رح يكون جاهز؟
تشغل أشخاصاً جدد في أبريل .	رح توظف ناس جداد في نيسان.	شغل ناس جدد بشهر أربعة.
سأكون سعيدا بذلك . متى ترغب في ذلك ؟	رح اكون مبسوط لهالشي. متى بدك ياه؟	رح أكون مبسوط بهاد الشي. متى بدك ياه؟
رائع .	بجنن.	ممتاز.
من فضلك اتجه يساراً عند التقاطع التالي .	لو سمحت روح عاليسار بالتقاطع الجاي.	لو سمحت روح عالشمال عند تقاطع ثاني.
هلا أريتني بعض الفساتين ؟	ممكن توريني شوي من الفساطين؟	ممكن تفرجيني شوية فساتين؟
أين المقهى ؟	وين الكوفي شوب ؟	وين المقهى؟
لا يمكنك جلب الألعاب النارية إلى كندا .	ما بتقدر تجيب ألعاب نارية على كندا.	ما بتقدر تجيب العاب نارية على كندا.
اعتقد أن هذا عالي قليلا بالنسبة لي .	بتوقع أنه شوي عالي بالنسبة الي.	بظن انه هاد غالي شوي علي.
لم يعد بإمكانك حقيقةً أن تقوم بعمل تصميم دون كمبيوتر بعد الآن .	بطلت تقدر تعمل تصميم بدون كمبيوتر من هون و طالع.	ما عاد بتقدر تعمل تصميم بدون كمبيوتر هسا.
أريد اسطوانة مدمجة .	بدي سي دي.	بدي اسطوانة مدمجة.
هل يمكنني حجز غرفة بسريرين تطل على المحيط ؟	بصير أحجز غرفة بتختين بطل على البحر؟	بقدر أحجز غرفة بسريرين بتطل على المحيط؟
مايومي , هل تسمح أن تملأ هذه الورقة بتوقيعك ؟	مايومي، ممكن تعبيي هاي الورقة بتوقيعك؟	مايومي, بتقدر تعبي هاي الورقة بتوقيعك؟
هلا أرشدتني إلى مطعم مفضل بين الشبان ؟	ممكن ادلني على مطعم معروف بين الشباب؟	ممكن تدلني على مطعم مفضل عند الشباب؟
حجزنا مقعداً ليوم الخامس والعشرين من أكتوبر في الساعة الحادية عشر صباحاً .	حجزنا مقعد لخمسة و عشرين من شهر عشرة الساعة احدعش الصبح.	حجزنا مقعد يوم خمسة وعشرين من شهر عشرة الساعة أحدعش الصبح.
إن الناس ودودون جداً .	الناس حابيين كثير.	الناس كثير ودودين.
متى يتعين علي أن أكون في المحطة ؟	أي وقت لازم أكون بالمحطة؟	متى لازم أكون بالمحطة؟
ليس هذا صحيحاً . أنت دائما تعاملني .	هاظ مش صحيح . إنت دايما بتعاملني.	مش صح. إنت دايما بتعاملني.
ما نوع العصير الذي تفضله ؟	شو نوع العصير اللي بتحبه ؟	شو نوع العصير يلي بتحبه؟
هل لي في بعض الفلفل ؟	ممكن أخذ شوي فلفل؟	ممكن تعطيني فلفل؟
احتاج إلى بعض الهدايا التذكارية من نيويورك .	أنا بدي شوية هدايا تذكارية من نيويورك.	بدي شوية هدايا تذكارية من نيويورك.
اسمي " تارو تاناكا " لدي حجز مسبق .	اسمي " تارو تاناكا " عندي حجز من قبل.	اسمي " تارو تاناكا " عندي حجز مسبق.
إنها الثالثة والربع .	الساعة ثلاثة وربع.	هي ثلاث و ربع.
كم التكلفة كلها ؟	قديش الكلفة كلها؟	قديش السعر كله؟
لا أدري كم من النقود يجب علىّ تركه كبقشيش ؟	ما بعرف قديش لازم أترك بغشيش.	مش عارف كم المصاري لازم أتركها كبقشيش؟
سآخذ شيكولاتة ساخنة .	بدي آخذ هوت شوكليت.	راح أوخذ شيكولاتة ساخنة.
ماذا تنوي أن تفعل عقب الانتهاء من المدرسة . ؟	شو بتخطط تعمل بعد ما تخلص مدرسة؟	شو ناوي تعمل بعد ما تخلص المدرسة؟
أشعر بالغثيان .	بحس حالي بدي أتقيء.	حاس حالي جوعان.
ماذا ؟ هل عليك دفع ضرائب عندما يكون لديك أكثر من ثلاثة زجاجات كحول ؟	شو؟ عليك ضرايب بس يكون عندك أكثر من ثلاث قناني كحول؟	شو؟ لازم تدفع ضرائب لما يكون عندك أكثر من ثلاث قناني كحول؟
لقد حصلت على بطارية فارغة .	بطاريتي صارت فاضية.	جبت بطارية فاضية.
معذرة . أنا طالب جامعي من اليابان . هل أنتم طلاب في جامعة نيويورك ؟	معلش، أنا طالب جامعي من اليابان. إنتوا طلاب بجامعة نيو يورك؟	عفواً. أنا طالب جامعي من اليابان. انتو طلاب بجامعة نيويورك؟
من الذي يعزف ؟	مين اللي عم يعزف؟	مين اللي بعزف؟
معطف رائع . هل هو صناعة بريطانية ؟	جاكيت حلو. هاد صنع بريطاني؟	فستان حلو. صناعة بريطانية؟
هل لديكم فيلم شفاف ملون ؟	عندك فلم شفاف ملون؟	عندكم فيلم شفاف ملون؟
أين قسم السيدات ؟	وين قسم النسوان؟	وين قسم السيدات؟
جميل الفستان التي ترتدينه .	حلو الفسطان اللي لابسيته.	حلو الفستان يلي لابستيه.
تموج شعر دائم مشدود من فضلك .	كيرلي عطول مشدود، لو سمحت.	شعر دائم مشدود لو سمحت.
هل لدينا وقت كاف لإنهاء إجراءات المغادرة ؟	معنا وقت كافي لنخلص إجراءات المغادرة؟	عندنا وقت نجهز فيه إجراءات المغادرة؟
هل هناك جولة بالحافلة تجوب المدينة ؟	في دورة بالباص نلف بالبلد؟	في جولة بالباص تجوب المدينة؟
هل أستطيع الحصول على تذكرة متعددة الاستخدام ؟	ممكن أوخذ بطاقة ذكية؟	بقدر اخد تذكرة متعددة الاستخدام؟
كان فيلم " حرب الكواكب " أكثر الأعمال شعبية عام ألف وتسعمائة وأربعة وثمانون .	كان فيلم "حرب الكواكب" من أشهر الأفلام سنة ألف وتسعمائة وأربعة وثمانون.	كان فيلم "حرب الكواكب" أكثر الأعمال الشعبية سنة ألف وتسعمية وأربعة وثمانين.
أوه ، يجب أن تخطر القنصلية على الفور .	أوه، لازم تبلغ القنصلية هسا.	اوه، لازم تخطر القنصلية فورا.
هل يوجد ملهى ليلي جيد به عرض رقصة الفلامنكو ؟	في نايت كلوب رايق عنده رقصة الفلامنكو؟	في ملهى ليلي كويس فيه رقصة الفلامنكو؟
لماذا لم تقلع الرحلة ؟ أخبرني عما يجري .	ليش ما طلعت الرحلة؟ قلي شو بصير.	ليش ما طارت الرحلة؟ قلي شو بصير.
سأصبح بديناً في حال ما ظللت جالساً هنا آكل باستمرار .	رح أصير ناصح لو استمريت قاعد هون آكل دايما.	رح أصير بدينا اذا ظللت قاعد هون آكل باستمرار.
هل على السيدات ارتداء فستان سهرة ؟	لازم الستات يلبسن فسطان سهرة؟	النساء بلبسوا فستان سهرة؟
حسنا إذاً ، أريد عصا مضرب أصغر كتلك التي مع جوليا روبرتس .	ماشي يعني، بدي عصاة مضرب اصغر مثل اللي مع جوليا روبرتس.	تمام، بدي عصا مضرب أصغر زي هاي اللي مع جوليا روبرتس.
أريد أن اتصل هاتفياً بالسفارة اليابانية .	بدي أحكي بالتلفون مع السفارة اليابانية.	بدي أرن على السفارة اليابانية.
هل هذه السجائر معتدلة ؟	هاي السقاير معتدلة؟	هاي السجائر معتدلة؟
هل هذا طلب شخص آخر .	هاظا طلب واحد ثاني؟	هاظ طلب حدا ثاني؟
في حالة إمكان ذلك , احجز منضدة بالقرب من النافذة من فضلك .	لو في امكانية, احجزلي طاولة عند الشباك لو سمحت.	لو سمحت, احجز طاولة قريبة من الشباك لو سمحت.
هل يمكن أن نحجز طاولة لخمسة أشخاص ؟	ممكن نحجز طاولة لخمس أشخاص؟	ممكن نحجز طاولة لخمس أشخاص؟
شركة الخطوط الجوية اليابانية ، طائرة رقم واحد اثنان ثلاثة .	شركة الخطوط الجوية اليابانية، رحلة الطيران رقم واحد اثنين ثلاثة.	شركة الخطوط الجوية اليابانية، طيارة رقم واحد اثنين ثلاثة.
من فضلك اتصل بي في الفندق عندما تجد حقائبي .	من فضلك، كلمني بالفندق لما تلاقي شنطي.	لو سمحت رنلي بالفندق لما تلاقي شناتيي.
ذلك الحد الأدنى للسعر .	هيك أقل سعر.	هاد السعر أقل من السعر.
أنت محظوظ .	إنت محظوظ.	انت محظوظ.
هل سيكون هذا المتجر مفتوحاً غداً ؟	راح يكون هاظ المحل فاتح بكرا؟	رح يكون هاظ المحل مفتوح بكرا؟
وصلت الفاتورة لمائة دولار .	وصلت الفاتورة لمية دولار.	وصلت الفاتورة مية دولار.
هل هذا مكتب الاستقبال ؟ هل يوجد عيادة قريبة ؟	هاظ مكتب الاستقبال؟ في عيادة قريبة من هون؟	هاظ مكتب الاستقبال؟ في عيادة قريبة؟
كم عمر ابنتك ؟	قديش عمر بنتك؟	قديش عمر بنتك؟
لن ينضم للجولة الاختيارية إلا القليل من الناس .	ما رح ينضم للجولة الاختيارية غير شوي من الناس.	ما رح ينضم للجولة الاختيارية إلا قليل من الناس.
إنها مجرد هدية تعبيرا عن تقديري .	هاي مجرد هدية تعبير عن تقديري.	هاي مجرد هدية تعبيرا عن تقديري.
تحتاج لرؤية أخصائي .	بتحتاج تشوف دكتور متخصص.	بدك تشوف دكتور.
كم تكلّف هي لكل جالون ؟	كم سعر الغلون الواحد؟	قديش بتكلف هي لكل جالون؟
أيمكنني الحصول على جدول زمني ، من فضلك ؟	ممكن أحصل على جدول الوقت، لو سمحت؟	ممكن تعطيني جدول زمني، لو سمحت؟
لقد سُرقت حقيبتي .	انسرقت شنتتي.	انسرق شنتتي.
نستخدم الأعواد عندما نأكل .	بنستعمل العيدان لما بنوكل.	نستخدم العواد لما نوكل.
حسناً ، في حالة إصرار كليكما , سأذهب معكما .	طيب، اذا انتو الاثنين مصرين، أني راح اروح معكو.	تمام، اذا اصر كليكما, رح اروح معك.
في أي محطة سأنزل للذهاب إلى مبنى إمباير ستيت ؟	بأي موقف لازم انزل عشان أروح على عمارة امباير ستيت؟	بأي محطة رح أنزل عشان أروح على مبنى إمباير ستيت؟
لابد أن تأخذها تسعة وتسعون مرة في اليوم ، قبل الوجبات .	لازم تاخذها تسعة وتسعين مرة باليوم، قبل الأكل.	لازم توخذها تسعة وتسعين مرة باليوم قبل الوجبات.
لا يا سيدي . هذه الظهيرة محجوزة بالكامل . ومع ذلك يمكن أن تحجز غدا .	لا، يا أستاذ، اليوم بعد الظهر كله محجوز. لكن بتقدر تحجز بكرا .	لا يا سيدي. هاي الظهيرة محجوزة بالكامل. مع هيك بتقدر تحجز بكرا.
هل هناك طبيب للفندق أو واحد على صلة بالفندق .	في دكتور للفندق أو واحد ع علاقة بالفندق؟	في دكتور للفندق أو واحد على صلة بالفندق.
المياه الساخنة ليست ساخنة بالقدر الكافي .	المية الحامية مش حامية بشكل كافي.	المي الساخنة مش ساخنة كثير.
هل استرحت في نومك ؟	ارتحت بالنومة؟	انبسطت نومك؟
أريد إعادة المال . هل يمكن أن أحصل على مالي ؟	بدي أرجع المصاري. بقدر أوخذ مصرياتي؟	بدي أرجع فلوسي. بقدر اخد فلوسي؟
انها باتجاه الجنوب .	هي باتجاه الجنوب.	هي باتجاه الجنوب.
ما سعر تذكرة درجة أولى إلى إدنبره , من فضلك ؟	كم سعر تذكرة درجة أولى لإدنبره , إذا تكرمت.	شو سعر تذكرة درجة أولى لـ إدنبرة, لو سمحت ؟
عندي قشعريرة .	عندي قشعيرية.	عندي قشعريرة.
لماذا , شكرا جزيلا . هل أستطيع الارتقاء للقمة ؟	ليش، شكراً كثير الك. بقدر اطلع للقمة؟	ليش, شكرا كثير. بقدر انزل للقمة ؟
لا . هل تحب الإبلاغ عنه ؟	لا . بدك تبلغ عنو ؟	لا، بتحب تبلغ عنه؟
من فضلك غير هذه الينات إلى جنيهات .	لو سمحت اصرفلي هظول من ين لقنيه.	لو سمحت غير هاي الينات لجنيهات.
سآخذ مقاعد درجة رجال أعمال ، أليس كذلك ؟	راح آخد مقاعد درجة رجال الأعمال، صح؟	رح أوخذ مقاعد درجة رجال أعمال، صح؟
لا أستطيع أن أفعل ذلك , لكني سوف أضعها في الحقيبة لك .	ما بقدر اعمل هيك , بس رح احطها بالشنتة الك .	مش قادر أعمل هيك, بس رح احطها بالشنتة إلك.
إنه غالي الثمن إلى حد ما . ألا يمكنك منحي خصماً ؟	هاد كثير غالي. ما فيك تعطيني شوية خصم؟	هو غالي شوي. ما بتقدر تعطيني خصم؟
إن " السنة " متقلقلة .	ال"سنة" عم تتقلب.	السنة "مهتلة".
سيكون جاهزا بعد غد في المساء .	راح يكون جاهز بعد بكرا المسا.	رح يكون جاهز بكرا المسا.
هل ليدكم صناديق لإرسال الطرود ؟	عندكم علب لارسال الطرود ؟	عندكم صناديق عشان ابعت الطرود؟
إن عثرت على شيء ، اتصل بي من فضلك .	لو لقيت إشي، رنلي إذا تكرمت.	لو لقيت اشي، رنلي لو سمحت.
أود تقصيره ببوصة واحدة من هذه المنطقة .	بدي اقصّره بوسطة وحدة من هادي المنطقة.	بدي اقصها بوصة وحدة من هاي المنطقة.
هل لديكم أي خبز ؟	عندكم خبز؟	عندكم خبز؟
أود بعض البيجامات .	بدي بيجامات.	بدي شوية بيجامات.
أين يمكنني طباعة الفيلم ؟	وين بقدر أطبع الفلم؟	وين بقدر اطبع الفلم؟
أيمكنك الحضور إلى هنا لإصلاحه ؟	ممكن تيجي هون عشان اتصلحه؟	بتقدر تيجي لهون تصلحوه؟
أين يمكنني أن أستقل حافلة لمشاهدة المعالم ؟	من وين ممكن اركب باص لحتى اتفرج ع المعالم؟	وين بقدر اركب باص عشان اشوف الاماكن السياحية؟
مرحبا يا سيدة ياماجوتشي ؟ فريقك على الخط . قبلت دعوتك . استمر من فضلك .	أهلا وسهلا يا سيدة ياماجوتشي، فريقك عم يكلمك. رديت على دعوتك. استمري، من فضلك.	مرحبا يا سيدة ياماجوتشي؟ فريقك عالخط. قبلت دعوتك. كمل لو سمحت.
هل لك أن تساعدني في الوصول إلى حقيبتي ؟	ممكن تساعدني ألاقي شنتيتي؟	بتقدر تساعدني أوصل لشنتتي؟
آسف لقد نفذ هذا الصنف لدينا .	معذرة، هاد النوع خلص عنا.	آسف، نفذ هاد الصنف عنا.
ما اسم الشخص الذي تود التحدث إليه ؟	شو اسم الشخص اللي بدك تحكي معه؟	شو اسم الشخص اللي بدك تحكي معه؟
لقد اجتزت هذا الاختبار بنجاح كبير .	عديت الامتحان بنجاح كبير .	خلصت هاظ الاختبار بنجاح كبير.
طبقاً لتقرير الطقس ، فإن غداً سيشهد سقوط جليد .	بناءً على النشرة الجوية، راح تثلج بكرا.	حسب تقرير الطقس، بكرا رح يكون جليد.
لا أستطيع ضبط اللوحة .	مش قادر أزبط الصورة.	مش قادر أضبط اللوحة.
لا زالت غالية جدا . هل من الممكن أن آخذها بثلاثة دولارات ؟	بعدها غالية كثير. ممكن أشتريها بـثلث دولارات؟	لسا غالية كثير. ممكن آخذها بثلاث دولارات؟
نريد اثنين هامبورجر واثنين قهوة ، من فضلك ، نريد تناولها خارج المحل .	بدنا زوج همبرجر وزوج قهوة، لو سمحت، بدنا ناكلها برة المحل.	بدنا اثنين هامبورجر واثنين قهوة، لو سمحت، بدنا نوكلها برا المحل.
زدني قليلاً .	زيدني شوي.	زد شوي.
هل لي بشوكة أخرى ؟	بدي شوكة ثانية؟	ممكن شوكة ثانية؟
أنا هنا في مهمة إعلامية .	أنا هون بشغل إعلامي.	أنا هون بمهمة إعلامية.
إنها ليست أحدث طراز ، أليس كذلك ؟	هاي مش أحدث موديل ، صح؟	مش أحدث موديل، صح؟
أبغي بعض الأقراص المنومة .	بدي حبوب منوم.	بدي شوية حبوب منومة.
أي حافلة تذهب إلى وسط المدينة ؟	أي باص رايح عالدوار الرئيسي؟	أي باص بروح على وسط البلد؟
أريد الذهاب إلى مركز هارفارد . هل يمكن أن تخبرني عندما نصل إلى هناك ؟	بدي اروح على مركز هارفارد. ممكن تقلي لما نوصل هناك؟	بدي اروح على مركز هارفارد. بتقدر تحكيلي لما نوصل هناك؟
أريد أن أحجز على شركة نورث وست إيرلينز على الرحلة رقم صفر ثمانية ستة في الخامس .	بدي احجز على شركة نورث وست إيرلينز على الرحلة رقم صفر ثمانية ستة بخمسة الشهر.	بدي احجز على شركة نورث وست إيرلينز على الرحلة رقم صفر ثمنية ستة بالخامس.
لقد استمتعت بالوجبة كثيراً جداً .	كثير استمتعت بالوجبة.	انبسطت بالوجبة كثير.
سيكون هناك تأخير بسيط .	راح يكون في تأخير بسيط.	رح يكون في تأخير بسيط.
فقط إذا كانت ملكك ، سيدي . هاها ، مزحة صغيرة .	بس اذا كانت ملكك ، يا سيدي . ههههههه، هاي مزحة صغيرة.	بس اذا كانت ملكك ، سيدي. هاي مزحة صغيرة.
نستطيع أن نرتب لتنظيف غرفاتكم .	ممكن نرتب معك عشان تنظيف غرفكم.	ممكن نرتب لغرفكم.
وما هي المثانة ؟	وشو هي المثانة ؟	شو هي المثانة؟
لا أستطيع النوم جيداً أثناء الليل .	ما قدرت أنام مليح بالليل.	مش قادر انام كويس بالليل.
ما هو مستوى مهارتك في عزف الكمان ؟	شو مستواك بعزف الكمان؟	شو مستوى مهارتك بعزف الكمان؟
ما هي أكثر الأشياء التي تثير اهتمامك الآن ؟	شو أكثر الأشياء اللي بتلفت انتباهك هسا ؟	شو أكثر اشي لفت انتباهك هسا؟
اجعل قصة الشعر تتدلى لأسفل , من فضلك .	خلي قصة الشعر تنزل لتحت، لو سمحت.	جعل قصة الشعر تتدلى لأسفل, لو سمحت.
هل لك أن تستدعي لي سيارة أجرة الساعة الثامنة صباح غد ؟	ممكن تجيبلي تكسي بكرا الساعة ثمنية الصبح؟	بتقدر تطلبلي تكسي الساعة ثمنية بكرة الصبح؟
هلا ملأت هذا النموذج ؟	ممكن تعبي هاذ النموذج؟	ممكن تعبي هاد النموذج؟
أيمكنك الانتهاء من ذلك بعد عشر دقائق ؟	بتقدر تخلص هاي بعد عشر دقايق؟	بتقدر تخلصها بعد عشر دقايق؟
الملح من فضلك .	الملح لو سمحت.	الملح لو سمحت.
لقد نمت و لم أتيقظ حين رن منبه السادسة و النصف .	نمت و ما صحيت ع منبه الساعة ستة ونص.	نمت و ما صحيت لما رن المنبه الستة و نص.
نحن من أكبر موردي أجهزة الميكروكومبيوتر .	إحنا من أكبر موردين لأجهزة الميكرو كمبيوتر .	احنا من أكبر موردي أجهزة الميكروكومبيوتر.
من فضلك أخبرني كيف أملأ بطاقة النزول إلى البر ؟	لو سمحت قلي كيف أعبي بطاقة النزول للبر؟	لو سمحت قلي كيف أعبي بطاقة النزول للبر؟
دجاج محمر ، من فضلك .	دجاج مشوي، لو سمحت.	دجاج محمر ، لو سمحت.
أجل ، ولكن هذا كثير جدا ، ولقد شبعت بالفعل .	أيوة، بس هاي كتير كثير ، وأنا صرت أكلت كفاية.	أه ، بس هاد كثير كثير ، و شبعت فعلا.
لقد أُغلق علي الباب . هل يمكن أن تفتح بابي , من فضلك ؟	ييي تسكر علي الباب . بتقدر تفتحلي الباب، لو سمحت؟	أغلق علي الباب. بتقدر تفتح بابي, لو سمحت؟
بكل تأكيد . سنكون سعداء لفعل هذا .	أكيد. راح نكون مبسوطين نعمل هيك.	أكيد. رح نكون مبسوطين عشان هيك.
يقولون إن الأنفلونزا منتشرة هناك .	بيقولوا انو الإنفلونزا معمية هنيك.	بقولو إنفلونزا منتشرة هناك.
هل ستدفع شركة الطيران رسوم الفندق والوجبات ؟	رح تدفع شركة الطيران رسوم الفندق والوجبات؟	راح تدفع شركة الطيران رسوم الفندق والوجبات؟
نسيت تذكرة الطيران الخاصة بي في الفندق .	نسيت تذكرة الطيارة قيتي بالفندق.	نسيت تذكرة الطيران تبعتي بالفندق.
هل يمكن أن احصل على احدى المجلات أو شيئ من هذا القبيل ؟	ممكن أوخذ وحدة من المجلات أو شي زي هيك؟	ممكن أوخذ مجلة أو إشي زي هيك؟
تناسبني تماما .	مناسبيتني كثير.	تناسبني كثير.
خذني إلى المستشفى .	خذني على المستشفى.	خذني عالمستشفى.
ربما كان يعاني سّدَّة تنفسية .	ممكن عنده صعوبة بالتنفس.	ممكن كان عنده سّد تنفس.
كم تكلفة الذهاب إلى فندق سي ؟	قديش بتكلف الروحة لفندق سي؟	قديش بتكلف الروحة على فندق سي؟
هل هناك أي غرف خالية في عربة النوم ؟	ظل في أي غرف فاظية بعرباية النوم؟	في غرف فاضية بعرباية النوم؟
هل يوجد بوتيك قريب من هنا ؟	في بوتيك قريب من هون؟	في بوتيك قريب من هون؟
عندما أرى الأسعار بهذا الرخص ، يبدو الأمر سخيفاً أن أشتري أي شيء في اليابان .	لما أشوف الأسعار بهالرخص ، بحس أنه مسخرة الواحد يشتري أي شي باليابان.	لما اشوف الاسعار بهاي الرخص، شكله مش مليح اني اشتري اشي باليابان.
لم يخرج من الماكينة شيء .	ما طلع من الماكينة إشي.	ما طلع من الماكينة اشي.
كم كان ثمنها ؟	قديش كان حقها ؟	قديش كان سعرها؟
أريد هدية بمناسبة الذكرى السنوية .	بدي هدية لمناسبة الذكرى السنوية.	بدي هدية بمناسبة الذكرى السنوية.
علي أن ألحق طائرة متجهة للوس أنجليس باكر صباح غد .	لازم ألحق طيارة لوس أنجلوس بكرا الصبح بكير.	لازم ألحق طيارة رايحة على لوس أنجليس بكرا الصبح.
يا صاح , أتعرف أي مكان يستحق الرؤية قريبا من هنا ؟	أخوي، بتعرف أي مكان محرز الشوفة قريب من هون؟	يا صاح, بتعرف وين المكان اللي لازم نشوفه قريب من هون؟
عندي الكثير من الوقت .	عندي وايد وقت.	عندي كثير وقت.
من أين يمكنني شراء بعض الهدايا التذكارية ؟	منين بقدر أشتري شوية هدايا تذكارية ؟	من وين بقدر اشتري شوية هدايا تذكارية؟
أنظر إلى هذا . انظر إلى هذا . سوف تخبرني أن الاختلاف بين هذا الشاب وذلك الشاب هو الحظ ؟ محمد ، يقف بالسيارة في جانب الطريق ، وأنت ؟ لن تمانع في أن أنام معك هنا . أنا متأخر . كان لقاء جميل معك ؟	شوف هاظ. شوف هاظ. راح تحكيلي انو الفرق بين هالشب وهذاك الشب هو الحظ؟ محمد، واقف بالسيارة على زقاق الشارع، وإنت؟ ما راح تعترض اذا قعدت معك هون. انا تأخرت. كان لقاء حلو معك؟	شوف هاظ. شوف هاظ. شوف هاظ الشاب. إنت؟ ما عندك مشكلة أنام معك هون. أنا متأخر. كان لقاء حلو معك؟
أعمل في شركة تجارية .	أني بشتغل بشركة تجارية.	بشتغل بشركة تجارية.
أفهم ، لكن لا أستطيع أن أقولها .	فاهم، بس بقدر أقولها.	فاهم، بس مش قادر أحكيها.
نصف زجاجة , من فضلك .	نص قنينة ، لو سمحت.	نصف قنينة, لو سمحت.
متى تقام مباراة كرة القدم ؟	متى بتبلش مباراة كرة القدم؟	متى رح تقام مباراة كرة القدم؟
ما هو متوسط أسعاركم للفاكس الدولي كل شهر ؟	كم معدل تكلفة الفاكس الدولي كل شهر؟	شو سعركم للفاكس الدولي كل شهر؟
انتظر دقيقة من فضلك .	استنى دقيقة لو سمحت.	استنى دقيقة لو سمحت.
هل هو محجوز بالكامل ؟	هو محجوز كله؟	هو محجوز بالكامل؟
شيء خطأ مع حقيبتك .	اشي غلط بشنتك .	إشي غلط بشنتتك.
كلا منا يريد أن يحاسب على وجبته .	إحنا كل واحد بدو يدفع عن أكلته.	كل واحد حاب يحاسب على وجبته.
ألم تتلق الاستمارة بالطائرة ؟	ما أخذت الاستمارة بالطيارة؟	ما تلقيت الاستمارة بالطائرة؟
هل لديك أي شيء لفترة أطول قليلاً ؟	عندك أي اشي لوقت أطول شوي؟	عندك إشي أطول شوي؟
أجل ، من فضلك أرسله إلى الغرفة اثنا عشر أربعة وثلاثون .	أيوه، لو سمحت وديه على الغرفة اثنعش أربعة وثلاثين.	أه ، لو سمحت ابعثه على الغرفة اثنعش أربعة وثلاثين.
أين البحيرة ؟	وين البحيرة؟	وين البحيرة؟
هل هناك حافلة تذهب مباشرة إلى هناك ؟	في أي باص بروح هناك مباشرة؟	في باص بروح مباشرة لهناك؟
أريد هذا الطراز لخمسة أماكن مرصعة .	بدي هاي النوعية لخمس أماكن مرصعة.	بدي هاظ الطراز لخمس أماكن مرصعة.
هل لك أن تغلف هذه كالهدية ؟	ممكن تلفلي هاي كهدية؟	ممكن تلف هاي زي الهدية؟
نعم لدينا هذا ، سوف نجهزها لك .	اه موجود عنا. رح نجهزلك اياه.	اه عنا هاظ ، رح نجهزها الك.
هل يمكنك تبديل هذه بواحدة جديدة ؟	ممكن تبدلي هاي بوحدة جديدة؟	بتقدر تبدل هاي بواحد جديد؟
عفواً . ستكون جاهزة في غضون خمس دقائق .	عفوا. رح تكون جاهزة خلال خمس دقايق.	عفواً. رح تكون جاهزة خلال خمس دقايق.
أين يمكنني أن أشتري إبريقاً ؟	من وين بقدر اشتري بريق؟	وين بقدر اشتري إبريق؟
أعتقد أن عمره أكثر من خمسين سنة .	بتوقع عمره اكثر من خمسين سنة.	بتوقع عمره أكثر من خمسين سنة.
أود أن أطلب , من فضلك .	بدي أطلب , بعد إذنك.	بدي اطلب, لو سمحت.
معذرة . كيف يمكنني الوصول إلى المصرف ؟	معلش، كيف بقدر أوصل للبنك؟	معلش، كيف بقدر أوصل للمصرف؟
لدي بعض الملابس للمغسلة .	عندي شوية وعية للغسيل.	عندي شوية أغراض للمغسلة.
كريمة وسكر ؟	كريمة وسكر؟	كريمة وسكر؟
هل يوجد أي قطار سريع إلى بوسطن ؟	في أي قطار سريع لبوسطن؟	في قطار سريع لبوسطن؟
الحجوزات في السابعة ، تحت اسم مانو .	حجوزات الساعة سبعة، بإسم مانو.	الحجوزات الساعة سبعة، تحت اسم مانو.
أين أفضل مكان لمشاهدة المعالم ؟	وين أحسن مكان لشوفة المناظر؟	وين أحسن مكان عشان أشوف المعالم ؟
هل يمكنك أن تريني كيف أضع الغاز ؟	ممكن توريني كيف أحط الغاز؟	بتقدر تفرجيني كيف احط الغاز؟
علىّ أن أذهب ، سأتصل بك لاحقاً .	أني لازم أروح. رح أحكي معك بعدين.	لازم اروح، رح ارن عليك بعدين.
لا كهرباء .	ما في كهربا.	ما كهرباء.
ثلاثون دولاراً وثمانون سنتا .	ثلاثين دولار وثمانين سنت.	ثلاثين دولار و ثمنين سنت.
هل تعرف طبيب أسنان جيد ؟	بتعرف دكتور اسنان كويس؟	بتعرف دكتور اسنان كويس؟
هل من الممكن أن أمكث في غرفتي حتى الثانية مساءً ؟	ممكن أظل بغرفتي للساعة ثنتين المسا؟	ممكن أظل بغرفتي لثانية المسا؟
إن حول غرفتي ضجيجا بالغا .	في ضجة كبيرة حوال غرفتي	حول غرفتي ضجة كبيرة.
كم ستستغرق لكي تطلب ؟	قديش بدك يعني عشان تطلب؟	قديش بدك وقت عشان تطلب؟
معدتي تؤلمني بعد الوجبات .	معدتي بتالمني بعد الوجبات.	معدتي بتوجعني بعد الأكل.
نفضل مائدة بجوار النافذة .	بنحب طاولة جنب الشباك.	بدنا طاولة جنب الشباك.
كنت على رحلة يونيتد إيرلاينز رقم ثمانية اثنان ثمانية .	كنت برحلة يونايتد إيرلاينز الرقم ثمانية اثنين ثمانية.	كنت على رحلة يونيتد إيرلاينز رقم ثمانية اثنين ثمنية.
هل لك أن ترسم لي خريطة , من فضلك ؟	ممكن ترسملي خريطة، لو سمحت؟	ممكن ترسملي خريطة, لو سمحت؟
هل بإمكاني اللمس ؟	بقدر ألمسه؟	بقدر ألمس؟
يصعب العثور على هذا المكان . إنه في طريق ضيق يتفرع من الطريق الرئيسي .	صعب يلتقى هالمكان. هو بدخلة بتتفرع من الشارع الرئيسي.	صعب الاقي هاظ المكان. هو بطريق ضيق بتفرع من الطريق الرئيسي.
هلا أخذت هذه السراويل ؟	ممكن توخذ هاي البنطلونات؟	ممكن توخذ هاي السراويل؟
حسنا . إنها تتكلف خمسة وثمانون دولارا في البريد العادي وثلاثة دولارات في التوصيل الخاص .	طيب. بتكلف خمسة وثمانين دولر بالبريد العادي وثلاث دولرات بالتوصيل الخاص.	تمام. بتكلف خمسة وثمانين دولار بالبريد العادي وثلاث دولارات بالتوصيل الخاص.
إذاً يمكنني بكل ثقة أن أزكي برج مدينة سان فرانسيسكو . فهذا يعطيك فكره عن سان فرانسيسكو .	يعني بنصحك عالأكيد ب برج مدينة سان فراسيسكو. رح يعطيك لمحة عن سان فرانسيسكو.	تمام بقدر أرشح برج سان فرانسيسكو. هاد بيخليك تعرف عن سان فرانسيسكو.
لدي تقدير كبير للموسيقى الكلاسيكية .	كثير بقدر الموسيقى الكلاسيكية.	عندي تقدير كبير للموسيقى الكلاسيكية.
من فضلك استعمل غرفة القياس هناك .	من فضلك استخدم غرفة القياس هنيك.	لو سمحت استعمل غرفة القياس هناك.
سر في نفس الاتجاه حوالي خمس دقائق ثم لف لجهة اليسار .	امشي بنفس الاتجاه حوالي خمس دقايق و بعدين ارجع على الشمال.	امشي بنفس الاتجاه تقريبا خمس دقايق ثم لف عاليسار.
هل أجعله يعاود الاتصال بك عندما يعود ؟	بتحب أخليه يرجع يرنلك بس يرجع؟	ممكن أرنلك لما يرجع؟
من المرجح أن محبا للإبداع الفني مثلك سيستمتع اللوحات الزيتية غير التقليدية وعروض الموسيقى بالشوارع .	متوقع من محب للابداع الفني مثلك راح ينبسط باللوحات الزيتية والموسيقى وعروض الموسيقى بالشوارع.	من المحتمل انك بتحب الفن الفني زيك رح يستمتع بالوحات الزيتية الجديدة وعروض الموسيقى بالشوارع.
هل رشحت لي رحلة قصيرة ؟	هل اخترتلي رحلة قصيرة؟	ممكن تنصحني برحلة قصيرة؟
إنها سبعة عشر ايه . اوه ، انا آسف . لقد أخطأت .	هي سبعتعشر ايه . اوه ، أني آسف . غلطت	هي سبعةطعش ايه. اوه، انا آسف. غلطت.
كم المدة التي قضتها هي حتى الآن في المملكة المتحدة ؟	قديش المدة اللي عاشتها بإنجلترا؟	قديش قضيت هي لهسا في بريطانيا؟
هل قرّرتَ ؟	قررت؟	قررت؟
هل نذهب إلى أي مكان متحدثين مثل ذلك ؟	راح نظل نحكي هيك وين ما نروح؟	نروح على أي مكان فيه متحدثين زي هيك؟
سأذهب كي أسأل البواب عن الأجرة المناسبة .	رايح اسأل البواب عن الأجرة الصحيحة.	رح اروح عشان اسأل البواب عن الأجرة المناسبة.
اللون البني محبب هذا العام .	اللون البني مرغوب هالسنة.	اللون البني محبوب هاي السنة.
هناك قطع في بلوزتي . أتساءل هل يمكنك أن تخيطيه لي ، من فضلك ؟	في مزع ببلوزتي. بدي اسألك اذا بتقدر تخيطلي اياه، لو سمحت؟	في قطع بلوزتي. بتساءل ممكن تخيطلي اياه، لو سمحت؟
هل هذه هي آخر محطة ؟	هاظا آخر موقف؟	هاي اخر محطة ؟
هل يمكنني تركها في أي مكان من البلاد ؟	بقدر أسيبها بأي مكان بالبلد؟	بقدر اتركها بأي مكان من البلاد؟
أريد بعض التفاح ، من فضلك .	بدي شوية تفاح، لو سمحت.	بدي شوية تفاح ، لو سمحت.
أخشى أن لا يكون هنا أية دورة لتعليم الجولف .	خايف ما يكون في دورة لتعليم الجولف	بخاف ما يكون هون دورة لتعليم الجولف.
دعني أحول هذه المكالمة إلى المسئول .	خليني أحوّل هاي المكالمة للمسؤول.	خليني أحول هاي المكالمة للمسئول.
هل يمكن أن تحجزوا في العرض ؟	ممكن تحجزولي بالعرض؟	ممكن تحجزوا بالعرض؟
أنا أقيم في فندق هيلتون .	أنا قاعد بفندق الهلتون.	أنا ساكن بفندق هيلتون.
أحب هذه الخدمة بتقديم شامبانيا للتحية بعد الإقلاع . دعني أشرب فى صحتك .	بحب هاي خدمة توزيع شامبانيا للترحيب بعد ما نطير. خليني أشرب بصحتك.	بحب هاي الخدمة بتقديم شامبانيا للتحية بعد ما تقلع. خليني أشرب صحنك.
ما هو الحد الأدنى للعمر لفعل ذلك ؟	إيش أقل عمر مسموح يعمل هيك؟	شو هو الحد الأدنى لعمر حتى أقدر أعمل هيك؟
إلى فندقي ، من فضلك ، إن عنوان فندقي في هذه الورقة .	للفندق تبعي، لو سمحت، العنوان تبع الفندق ع هالورقة.	لفندقي ، لو سمحت ، عنوان الفندق بهاي الورقة.
أريد لقاء السيد ويليم .	بدي أشوف الأستاذ ويليم.	بدي اشوف السيد ويليم.
النبيذ ليس باردا بشكل كافي . هل نمكنك أن تجعله أكثر برودة ؟	الواين مش بارد كفاية. ممكن تبرده اكثر؟	النبيذ مش بارد كثير. بتقدر تخليه بارد أكثر؟
بكم هذا العطر ؟	بقديش هاظا العطر؟	بكم هاذ العطر؟
بالتأكيد سوف ترسلهم ، أليس كذلك ؟	أكيد راح تبعتثم، صح؟	أكيد رح تبعثهم، صح؟
أسف ، هذا المكان محجوز بالفعل .	آسف، هاذ المكان محجوز فعلاً.	أسف ، هاظ المكان محجوز فعلا.
من فضلك أعطني بعض النقود الفكة .	لو سمحت أعطيني شوية فراطة.	لو سمحت أعطيني شوية فراطة.
لا أعرف شيئاً عن هذا الأمر .	ما بعرف إشي عن هالشغلة.	ما بعرف اشي عن هاظ الموضوع.
حفلتك مقامة الآن . تفضل .	حفلتك مبلشة هسا. تفظل.	حفلة تك موجودة هسا. تفضل.
أخطط للبقاء لمدة اثنا عشر يوماً .	بخطط أظل اثنعشر يوم.	بخطط أظل اثنعشر يوم.
يوجد الكثير من السائحين بالقرب من المبنى ، ويبدو أنهم تجمعوا لإلقاء نظرة على ما يحدث .	في كتير سواح حوالين البناية، شكلهم متجمعين عشان يشوفوا شو اللي بصير.	في كثير من السياح قريب من المبنى، ويبدو انهم تجمعوا عشان يشوفوا شو بصير.
هل لك أن تقدر التكلفة قبل أن تبدأ العمل فيها ؟	ممكن تقدر قديش بكلف قبل ما تبدا شغل فيه؟	بتقدر تقدر التكلفة قبل ما تبلش تشتغل فيها؟
نعم . تم نقل أمتعة شخص آخر إلى غرفتي تواً . من فضلك ، هل من الممكن أن تقوم بفحصها ؟	اه، في شناتي لحدا ثاني وصلت غرفتي هسا.لو سمحت، ممكن تشوفها؟	اه. نقلوا اغراض حدا ثاني لغرفتي هسا. لو سمحت ، بتقدر تفحصها ؟
أريد أن أحصل على تعويض لذلك .	أنا بدي اوخد تعويض عن هاظ.	بدي تعويض لهاي.
بالتأكيد , كن على راحتك .	أكيد، كون على طبيعتك	أكيد, خليك مرتاح.
إن ثمة خطأ ما في بطاقة المفتاح هذه ، أعطني غيره ، من فضلك .	فيها غلطة شكلها بالكارت هاي، عطني وحدة ثانية، الله يخليك.	في خطأ ببطاقة المفتاح هاي ، اعطيني غيره ، لو سمحت.
من فضلك اتصل لي برقم ثلاثة اثنان ستة اثنان تسعة واحد ثمانية .	لو سمحت، رنلي على الرقم ثلاثة اثنين ستة اثنين تسعة واحد ثمانية.	لو سمحت رنلي على ثلاثة اثنين ستة اثنين تسعة واحد ثمنية.
أين مدخل مترو الأنفاق ؟	وين دخلة المترو؟	وين مدخل مترو الانفاق؟
معذرة . ولكني أريد تسليم تقرير السرقة .	معلش، بس بدي أسلم تقرير السرقة.	عفواً. بس بدي أسلمه تقرير السرقة.
هذا المقاس ، الذي تسميه المقاس العادي ، سوف تجده هنا .	هاذ الحجم ، اللي بتسميه حجم عادي، راح تلاقيه هون .	هاظ الحجم ، اللي بتسميه الحجم العادي ، رح تلاقيه هون.
إنه رديء الصنع .	هو مش صنوع منيح.	هو رديء الصنع.
هل يمكن أن تخبرني عن ساعات العمل ؟	ممكن تحكيلي عن ساعات الشغل؟	بتقدر تحكيلي عن ساعات الشغل؟
اعطني شهادة طبية , من فضلك .	عطيني وصفة طبية ، لو سمحت .	أعطيني شهادة طبية, لو سمحت.
ليس معي فكة صغيرة .	ما معي فراطة.	ما معي فكة صغيرة.
هل يمكن أن أرى هذا ؟	ممكن أشوف هاظا؟	ممكن أشوف هاظ؟
ليس لدى أي شئ لكي أعلنه .	ما عندي أي اشي عشان أعلنه.	ما عندي إشي عشان أعلنه.
أعتقد أنني تركت كاميرتي وغادرت عندما كنت أتناول العشاء هنا الليلة الماضية .	بظن اني تركت كميرتي و روحت لما كنت اكل هون امبارح عالعشا.	بتوقع اني تركت كاميرتي و رحت لما كنت بعشا هون الليلة الماضية.
دعنا نجتمع لنبحث الأمر أكثر .	خلينا نلتقي عشان اناقش هاظ الموضوع أكثر.	خلينا نجتمع ندور الموضوع أكثر.
هيه ، هذا فستان جميل حقا .	مرحبا ، هاذا فعلا فسطان حلو.	هيه، هاظ الفستان حلو كثير.
من فضلك كن صديقي بالمراسلة .	من فضلك, كون صاحبي عالتواصل.	لو سمحت كن صاحبي بالمراسلة.
أعطني خمسين ، من فضلك .	اعطيني خمسين ، إذا سمحت.	أعطيني خمسين ، لو سمحت.
ما هذا المكان الذي نمر به الآن ؟	شو هالمكان اللي بنمر فيه هسا؟	شو هو المكان اللي بنمر فيه هسا؟
هل لي في استعارة بعض البياضات ؟	ممكن أستعير شرارشف؟	ممكن أستعير شوية بياضات؟
أوه , يبدو كأنه قرعة .	أوه، شكله قرعة .	اوه, شكله قرعة.
اشعر كأن هناك تحديق في . هل من النادر رؤية شخص ياباني ؟	حاسك بتسرح فيه. لهاي الدرجة قليل تشوف واحد ياباني؟	حاس كأنه في تحديق. نادرا أشوف حدا ياباني؟
سنبعث لك بالبريد عشرين عينة إضافية .	رح نبعتلك عالبريد عشرين عينة زيادة.	رح نبعثلك بالبريد عشرين عينة زيادة.
إن الرصيف رقم خمسة يقع هناك .	الرصيف رقم خمسة موجود هناك.	الرصيف رقم خمسة موجود هناك.
أين يوجد مكان لطيف لقضاء نزهة ليوم واحد ؟	وين بلاقي مكان لطيف أظل فيه رحلة ليوم واحد؟	وين في مكان حلو نروح فيه نزهة ليوم واحد؟
يا سيد كاواي لدينا مائدة لك الآن . تفضل من هنا .	يا أستاذ كاواي، عنا طاولة الك حاليا. تعال من هون.	يا سيد كاواي عنا طاولة إلك هسا. تفضل من هون.
لا توجد مشكلة . إذا حضرت في الخامس من سبتمبر ، فسيكون بإمكانك الاستمتاع بعرض فيلم علمي لأن عندنا يوماً خاصاً مفتوحاً أول يوم جمعة من كل شهر .	ما في مشكلة. اذا اجيت بخمسة تسعة ، بتقدر تستمتع بالفلم العلمي لأنه احنا عنا يوم مميز مفتوح بأول جمعة من كل شهر.	ما في مشكلة. اذا حضرت يوم خمسة من شهر تسعة، بتقدر تستمتع بعرض فيلم علمي لأنه عنا يوم خاص أول يوم جمعة من كل شهر.
هل بإمكاني الحصول على طبق آخر مثل هذا ؟	بقدر آخذ صحن ثاني مثل هاذ؟	بقدر اخد صحن ثاني زي هاد؟
لا تهتم . على أي حال ، خذني من فضلك إلى مركز الحي الصيني . سأحاول أن أجده بنفسي .	ما تشيل هم. يلا، خذني لو سمحت لمركز الحي الصيني. راح احاول ادور الجهة وحدي.	لا تهتم. على كل حال، خذني لو سمحت لمركز الحي الصيني. رح أحاول ألاقيو بنفسي.
أهه ، هيا . دولارين فقط .	اها، يلا. بس دولارين.	أه ، يلا. دولارين بس.
سندويتشان برجر بالجبن ، من فضلك .	اثنين برجر بالجبنة، لو سمحت.	سندويشة برجر بالجبنة، لو سمحت.
أرغب في كريم مسائي للبشرة .	بدي كريم ليلي للبشرة.	بدي كريم مسائي للبشرة.
متى سنقلع ؟	أميت راح نقلع؟	متى رح نقلع؟
هذا طيب ، على ما يبدو .	هاذ طيب ، من شكله.	هاظ كويس ، على ما يبدو.
حسنا , الوقت متأخر إلى حد ما . أعتقد أنني يجب على أن أغادر الآن . شكرا جزيلا لك على الأمسية الرائعة .	ماشي, الوقت صار متأخر شوي. بظن انو لازم اروّح هسا. كتير شكرا على الليلة الممتعة.	ماشي, الوقت متأخر شوي. بتوقع انه لازم أطلع هسا. شكرا الك على الأمسية الحلوة.
لقد سقطت من على درجات السلم .	وقعت من على درج السلم	وقعت من السلم.
هذه السن في المقدمة تؤلمني .	هالسنة في الامام بتوجعني.	هاي السن يلي قدام بتوجعني.
من أي نوع من الجلد الصناعي صُنعت حقيبة السفر هذه ؟	شو نوع الجلد الاصطناعي المصنوع منه شنطة السفر هاي؟	من أي جلد صناعي صنعو شنتة السفر هاي؟
أين نشأت سمكات الفراش هذه ؟	من وين جاية سمكات الفراش هاي؟	وين نشأت سمكات الفراش هاي؟
سأخطط لإرسال فواتير حاجياتي اليومية ، لذا من فضلك أخبرني العنوان و اسم الشخص المسئول من فضلك .	رح أبعث فواتير حاجاتي اليومية، عشان هيك لو سمحت أعطيني عنوان واسم الشخص المسؤول.	رح أفكر أرن فواتير حاجياتي اليومية، عشان هيك لو سمحت احكيلي العنوان و اسم الشخص المسؤول لو سمحت.
أريد نسخة من تقرير السرقة .	بدي نسخة من تقرير السرقة.	بدي نسخة من تقرير السرقة.
أريد السفر من شنغهاي إلى هاواي بالباخرة .	بدي أروح من شنغهاي لهاواي عالسفينة.	بدي أسافر من شنغهاي لـ هاواي بالباص.
جريدة باللغة الإنجليزية ، لطفاً .	جريدة بالانجليزي، لو سمحت.	جريدة بالإنجليزي ، لو سمحت.
هل هناك سيارة ليموزين ؟	في سيارة ليموزين؟	في سيارة ليموزين؟
لا أريد واحدة ضخمة .	ما بدي وحدة دفشة.	بدي وحدة كبيرة.
أريد فندقاً آمنا يقدم إفطاراً جيدا ، من فضلك ؟	بدي فندق آمن ، بقدم فطور كويس ، لو سمحت ؟	بدي فندق آمن بقدم فطور كويس، لو سمحت؟
أربعة وعشرين دولاراً . هل تريد المزيد ؟	أربعة وعشرين دولار. بدك كمان؟	أربعة وعشرين دولار. بدك كمان؟
وقعت منى الشوكة . من فضلك أحضر واحدة أخرى .	وقعت مني الشوكة. لو سمحت جبلي وحدة ثانية.	وقعت مني الشوكة. لو سمحت جيبلي وحدة ثانية.
لاحظ الفجوة ، لاحظ الفجوة ، ثم قرب الأبواب ، من فضلك .	لاحظ الفتحة، لاحظ الفتحة ، بعدين قرب الابواب، لو سمحت.	شوف الفجوة ، شوف الفجوة ، بعدين قرب الابواب ، لو سمحت.
من فضلك ساعدني أعثر على مرشد يتحدث اليابانية .	لو سمحت ساعدني ألاقي دليل سياحي بحكي ياباني.	لو سمحت ساعدني الاقي مرشد بحكي ياباني.
ماذا عن هذه النماذج البلاستيكة ؟	شو رأيك بموديلات البلاستك هاي؟	شو بالنسبة لهاي النماذج البلاستيكة؟
دعونا نحتفل ، هكذا قال وآخذني إلى بار . وقال إنه سيُجري مكالمة هاتفية وغادر ولم يعد أبداً وتحملت أنا وحدي عبء فاتورة ضخمة .	"خلينا تحتفل" هيك قال وأخذني على البار. حكى انه رايح يعمل مكالمة وراح وما رجع إجى أبداً وأنا تورطت بفاتورة كبيرة.	خلينا نحتفل، هيك حكي و أخذني على البار. وقال إنه رح يعمل مكالمة و راح يرجع و ما رجع أبدا. و تحملت أنا وحدي فاتورة كبيرة.
أرغب في خلع أسناني .	أنا حاب أقلع سناني.	بدي أخلع أسناني.
أريد منبه ، من فضلك .	بدي منبه، لو سمحت.	بدي منبه ، لو سمحت.
ما توقيت إجراءات مغادرة الفندق ؟	متى منقدر نعمل الاجراءات حتى نطلع من الفندق؟	متى موعد مغادرة الفندق؟
أريد أن أحصل على استراحة .	بدي أوخذ بريك.	بدي استراحه.
هذه الغرفة اثنان صفر واحد . أريد أن أطلب إفطار الغد .	هاي الغرفة رقم اثنين صفر واحد. بدي أطلب فطور بكرا.	هاي الغرفة اثنين صفر واحد. بدي اطلب فطور بكرا.
هل هذا مصنوع من القطن ؟	هاذ مصنوع من القطن؟	هاظ مصنوع من القطن؟
ما هو مقدار الرسوم للوزن الزائد ؟	قديش الدفع على الوزن الزايد؟	قديش الرسوم للوزن الزائد؟
لدي معداتي الخاصة .	عندي أدواتي الخاصة.	عندي معداتي الخاصة.
في غرفة انتظار بالمحطة .	في غرفة انتظار بالمحطة.	غرفة انتظار بالمحطة.
كيف أستطيع مساعدتك ؟	كيف بقدر اساعدك ؟	كيف بقدر أساعدك؟
ادخل . من فضلك ضعها على المائدة هناك .	أدخل. لو سمحت حطها على الطاولة هنيك.	ادخل. لو سمحت حطها على الطاولة هناك.
حسناً . سأتأكد أن حقائبك ستكون هنا .	طيب . راح أتأكد إنه الشناتي رح تكون هون.	تمام. رح اتأكد انه شناتيك رح تكون هون.
سنأتي في السابعة .	رح نيجي الساعة سبعة.	رح نجي الساعة سبعة.
حقاً . اليوم هو الأحد ، والأحد هو أسوء الأيام .	فعلاً. اليوم الأحد، والأحد أسوأ الأيام.	جد. اليوم هو الأحد، والأحد هو أسوء الأيام.
إما أن تصلحها أو تستبدلها ، من فضلك .	يا تصلحها يا تبدلها، لو سمحت.	ممكن تصلحها أو تبدلها، لو سمحت.
ربما أعطيك إجابة أفضل من تلك بعد عرضين .	يمكن أعطيك جواب أحسن من هاذ بعد ما أشوفه مرتين.	ممكن أعطيك إجابة أحسن من هاي بعد عرضين.
إن ارتفاعه ألفان وأربعمائة متر .	إنو ارتفاعه ألفين وأربعمية متر.	ارتفاعه ألفين و أربعين متر.
هل يمكن أن أستعيد متعلقات ؟	ممكن أرجع متعلقاتي؟	بقدر ارجع اغراض؟
هل بإمكاني إجراء طلبية ؟	بقدر اطلب؟	بقدر اعمل طلبية؟
إنه خطئي . ليس خطأك .	هاي غلطتي. مش غلطتك.	هاد غلطتي. مش غلطتك.
لا يوجد أي منها .	ما في منهم.	ما في أي منها.
أريد غرفة بمنظر جميل .	بدي غرفة مع إطلالة حلوة.	بدي غرفة منظرها حلو.
أنا ياباني .	أني ياباني.	أنا ياباني.
هل لديكم دبابيس زينة ذات تصميمات رائعة ؟	عندك بروشات شكلها حلو؟	عندكم دبابيس زينة بتصاميم حلوة ؟
يبدوا أنني غير قادر على الحصول على الماء الساخن .	شكله مش قادر يجيب ميّة ساخنة.	شكله اني مش قادر اخد المي الساخنة.
هلا وقفت معي لالتقاط صورة ؟	بتقدر توقف معي شوي عشان نصور صورة؟	ممكن توقف معي عشان أصور؟
لا أعتقد أن ذلك يناسبني فجلدي جاف إلى حد ما .	ما بعتقد انه هاد بلبقلي، جلدي ناشف كثير.	ما بظن انه مناسبني. جلدي جاف شوي.
أكون ممتنا جدا لو أخذتني إلى الشاطئ .	راح أكون كثير ممنون لو توخذني لعند الشط.	بكون مبسوط لو أخذتني على الشط.
هل يمكنني الحصول على تذكرتين درجة ثانية لشيكاغوا , من فضلك ؟	ممكن أحجز تذكرتين لشيكاغو من الدرجة الثانية، لو سمحت؟	ممكن أخذ تذكرتين درجة ثانية لشيكاغوا, لو سمحت؟
أجل ، أنا . لقد كانوا يعيشون بجواري في كاليفورنيا لكنهم انتقلوا إلى فلوريدا منذ عامين . ماذا عنك ؟ هل تسافر بمفردك ؟	أيوه، أنا. كانوا عايشين بحدي بكاليفورنيا بس انتقلوا على فلوريدا من سنتين. شو بالنسبة الك؟ بتسافر لحالك؟	اه ، انا. كانوا ساكنين بجواري في كاليفورنيا بس انتقلوا لفلوريدا من سنتين. شو رأيك ؟ تسافر لحالك ؟
أنا من طوكيو .	أني من طوكيو.	أنا من طوكيو.
أي منتجات صوفية أخرى ؟	في منتجات صوف ثانية؟	أي منتجات صوفية ثانية؟
هل من الممكن أن تخبرنا كيف تقيم هذه الخطة ؟	ممكن تحكيلنا كيف بتعمل هاي الخطة ؟	بتقدر تحكيلي كيف بتقيم هاي الخطة؟
مساء الخير . أهلا .	مسا الخير. أهلين.	مسا الخير. أهلا وسهلا.
اخرج من ذلك الباب ، وانتظر عند المحطة رقم ستة .	طلع من هاي الباب، و انطر عند المحطة رقم ستة.	روح من هاد الباب ، واستنى عند المحطة رقم ستة.
سبعاً ، من فضلك .	سبعة، لو سمحت.	سبعه ، لو سمحت.
مهزوز ، وليس مضروب .	محرك، مش مخفوق.	مهزوز ، مش مضروب.
ثلاثة أيام .	ثلاث أيام.	ثلاث ايام.
تريد أن تشتري ثوبا .	هي بدها تشتري فسطان.	بدك تشتري ثوب.
لا ، ليس بعد ، هناك الكثير نختار فيه .	لا، بعده ، في كثير عشان تنقي منه	لا، لسا، في كثير بنختار فيه.
سر في خط مستقيم على طول النهر حوالي نصف ميل . ستصل للمتنزه .	إمشي دغري على طول النهر حوالي نص ميل. بتصل المنتزه.	امشي ماشي على طول النهر نص ميل تقريبا. رح توصل عالمتنزه.
أسف أنني بحاجة إلى أن أطلع على أي مستند لتحديد الهوية .	أسف أني بحاجة إني أشوف اثبات هوية.	أسف أني محتاج أشوف أي مستند لتحديد الهوية.
كن حذراً ، السقف منخفض .	انتبه ، السقف واطي.	كن حذر ، السقف منخفض.
كم تتقاضى لتطبيع صور الفيلم ؟	قديش بتوخذ عشان تطبع صور الفلم؟	قديش بتوخذ عشان تطبع صور الفيلم؟
هل يدخل هذا في حدود المعفي من الضرائب ؟	هاظ معفي من الضرايب؟	هاظ يدخل في حدود المعفي من الضرايب؟
غرفة مفردة بدون دش من فضلك .	غرفة مفردة بدون دش لو سمحت .	غرفة فردية بدون دش لو سمحت.
هل يمكن أن تدلّني أين أجد القنصلية اليابانية ؟	ممكن تحكيلي وين بقدر ألاقي القنصلية اليابانية؟	بتقدر تدلني وين بلاقي القنصلية اليابانية؟
من فضلك ضعها في قمع .	لو سمحت حطها ببوري.	لو سمحت حطها بقمع.
نصف أوقية من شانيل رقم خمسة من فضلك .	نص أوقية من شانيل رقم خمسة، لو سمحت.	نصف أوقية شانيل رقم خمسة لو سمحت.
شخصان .	شخصين.	شخصين.
هل تعرف ما إذا كان هناك أي فنادق رخيصة الأسعار ؟	بتعرف اذا في أي فنادق رخيصة؟	بتعرف اذا في فنادق رخيصة ؟
أريد أن أقدم طلباً للحصول على إصدار جديد .	بدي أقدم طلب مشان اخد إصدار جديد.	بدي أقدم طلب عشان أحصل على إصدار جديد.
أريد بزة .	بدي سترة.	بدي بزة.
هذا مكلف نوعا ما .	هاي بتكلف شوي.	هاظ مكلف شوي.
لقد طلبت لحما لا سمكا . هل يمكنك تغيير هذا ؟	طلبت لحم مش سمك. ممكن تغير هاي؟	طلبت لحم ما سمك. بتقدر تغير هاد؟
عذراً . هل يوجد محل كتب قريب من هنا ؟	عفواً . في مكتبة بتبيع كتب قريب من هون ؟	معلش، في محل كتب قريب من هون؟
حينئذ سنأخذها .	بهالوقت رح نوخذها.	لما رح نوخظها.
إنه بعيد جداً . يحسن بك أن تأخذ سيارة أجرة .	هو بعيد كتير. فضل أكيد تاخذ تكسي.	هو بعيد كثير. لازم توخذ تكسي.
في أي وقت نبدأ ؟	على أي ساعة راح نبلش؟	بأي وقت بدنا نبلش؟
حسناً . لقد تم التأكيد . هل يمكننا أن نأخذ رقم تليفونك في حالة الحاجة إلى الاتصال بك ؟	ماشي، اتأكدت . بنقدر نوخذ رقمك تلفونك في حال احتجنا نتصل فيك؟	تمام. تأكدنا. بنقدر نأخذ رقم تلفونك اذا بدنا نتصل فيك ؟
حسنا . خصم خمسة في المائة . هل يوافقك لك ؟	ماشي ، خصم خمسة بالمية. بمشي معك؟	تمام. خصم خمسة بالمية. بتوافقك؟
الآن ، مكالمتك ردت . تفضل من فضلك .	حاليا، مكالمتك رجعت. تفضل لو سمحت.	هسا مكالمتك ردت. تفضل لو سمحت.
أوه ، أهي كذلك ؟ كيف تفضلها ؟	أووه، هي هيك؟ كيف بتحبها؟	اه ، هي هيك ؟ كيف بتحب ياها ؟
أنا فقدت أثر بريد مسجّل .	ضيعت أثر رسالة مسجلة.	ضيعت أثر بريد مسجّل.
لا أشعر بحالة جيدة . هل ترشدني إلى طبيب ؟	ما بحس حالي ملبح. ممكن ادلني على دكتور؟	مش حاس حالي كويس. بتقدر تدلني على دكتور؟
هل أنت ملم بجغرافيا اليابان ؟	إنت ملم بتظاريس اليابان؟	انت ملم بجغرافيا اليابان؟
لا أستطيع رؤية الشاشة جيداً من هنا ، هل يمكنني تبديل المقاعد لبعض الوقت ؟	أنا مش قادر أشوف الشاشة مليح من هون. ممكن نبدل المقاعد شوي؟	مش قادر أشوف الشاشة كويس من هون، بقدر أبدل الكراسي شوي؟
سعر الغرفة هو ستة آلاف ين في الليلة .	سعر الغرفة ست آلاف ين لليلة.	سعر الغرفة ستة آلاف ين بالليلة.
أعتقد أن سيارتي تستحق حوالي خمسة آلاف دولارا .	أنا بتوقع سيارتي بتسوى حوالي خمس الآف دولار.	بتوقع سيارتي بتستحق حوالي خمس الاف دولار.
أين حديقة الحيوان ؟	وين حديقة الحيوانات؟	وين حديقة الحيوانات؟
هي تريد بيرة .	هي بدها بيرا .	هي بدك بيرة.
هل هذه الحقيبة مناسبة لكل حالات الطقس ؟	هاي الشنتة بتناسب كل حالات الجو؟	هاي الشنتة مناسبة لكل حالات الطقس؟
أفضل شيء هو اسطوانة مصغرة .	أحسن اشي هو سي دي صغير.	أحسن اشي هو اسطوانة مصغرة.
فهمت ، في هذه الحالة ليس علىّ أن أدفع أجر التبديلات ، أليس كذلك ؟	فهمت، بهاي الحالة ما عليي أدفع فلوس التبديلات، مش هيك؟	فهمت، بهاي الحالة ما لازم ادفع حق التبديلات، صح؟
هل يمكنك أن تريني حجماً أكبر بقليل ؟	ممكن توريني سايز اكبر شوي؟	بتقدر تفرجيني حجم أكبر شوي؟
هل يمكنك بطريقة ما أن تصف لي مرضك بالإنجليزية ؟	بتقدر بأي طريقة تشرحلي مرضك بالإنجليزي؟	بتقدر توصفلي مرضك بالإنجليزي؟
انتقلنا إلى هذا المنزل منذ عام .	رحلنا لهاظ البيت من سنة.	انتقلنا لهون البيت من سنة.
معذرة ، هل يسعني أن أتوجه إليك بسؤال ؟	معلش، بقدر أوجهلك سؤال؟	معلش، بقدر أسألك سؤال؟
هذا سعر مرتفع ، أليس كذلك ؟	هاظا سعره غالي، صح؟	هاظ السعر غالي ، صح ؟
نعم ، ولكن تأكد أن تذكرتك معك .	ايوه، بس تأكد إنه تذكرتك معك.	اه ، بس تأكد ان تذكرتك معك.
ما رأيك في موضوع التحرش الجنسي في مكان العمل ؟	شو رأيك بالتحرشات الجنسية اللي بتصير بمكان الشغل؟	شو رأيك بموضوع التحرش الجنسي بمكان الشغل؟
أريد تذكرتين ذهاب وعودة إلى أكسفورد .	بدي تذكرتين روحة رجعة على أكسفورد.	بدي تذكرتين روحة ورجعة لأكسفورد.
هل ستذهب إلى المدرسة هنا ؟	رح تروح عالمدرسة هون؟	بدك تروح عالمدرسة هون؟
أود بعضاً من فيلم رقم ايه إس ايه لهذه الكاميرا ، من فضلك .	بدي فيلم رقم ايه إس ايه لهاي الكميرا، لو سمحت.	بدي شوية فيلم رقم ايه إس إيه لهاي الكاميرا، لو سمحت.
أصبت بسحجة .	أني انشخطت.	جرحت.
أريد تسجيل أمتعتي .	بدي أسجل شنطي.	بدي أسجل أغراضي.
أريد أن أرى ذاك الذي في نافذة العرض ، من فضلك .	بدي أشوف هاذ الموجود بالواجهة، لو سمحت.	بدي اشوف هذاك اللي برا ، لو سمحت.
ما هي المحتويات ؟	شو المكونات؟	شو هي الأغراض؟
لقد تعطلت سيارتي . من فضلك احضر لتأخذها .	سيارتي خربت. تعال خذها لو سمحت.	تعطلت سيارتي. لو سمحت جيبلي اياها.
ما النمط الذي في مخيلتك ؟	شو النمط اللي بخيالك؟	شو النمط اللي ببالك؟
كيف تسير الأمور ؟	كيف ماشية الأمور؟	شلون بتمشي الأمور؟
ألا تسأله أن يتصل بي ؟	بتقدر تحكيله يتصل فيّ؟	ما تسأله يتصل معي؟
ما الغرض منها ؟	شو الهدف منها؟	شو الهدف منها؟
كيف يربي الآباء اليابانيون أولادهم ؟ هل هم صارمون مع أطفالهم ؟	كيف بيربو الآباء اليابانيين ولادهم؟ همة شديدين مع عيالهم؟	كيف يربي الآباء اليابانيين أولادهم؟ هم متعاونين مع أولادهم؟
هلا ضغطت على زر مصراع النافذة ؟	ممكن تكبس كبسة الشباك؟	ممكن تضغط على زر مصراع الشباك؟
أيمكنني أن أذهب هناك بمترو الأنفاق ؟	بقدر أروح هناك بالمترو؟	بقدر اروح هناك بمترو الانفاق؟
دعنا نشاهد التلفزيون . فيها مباراة بيسبول .	خلينا نتفرج على التلفزيون. في مباراة بيسبول.	خلينا نتفرج عالتلفزيون. فيها مباراة بيسبول.
حسناً . خذ هذا الاتجاه . من فضلك ، سأوصلك إلى غرفتك .	ماشي، خذ هاي الطريقة. لو سمحت، رح أوصلك لغرفتك.	تمام. خذ هاظ الاتجاه. لو سمحت، رح أوصلك على غرفتك.
أريد تمويج متقارب لشعري ، من فضلك .	بدي أعمل شعري كيرلي ، لو سمحت.	بدي تمويج قريب لشعري، لو سمحت.
نريد مائدة في الشرفة .	بدنا طاولة على البرندة.	بدنا طاولة بالشرفة.
معدتي ثقيلة .	معدتي كبيرة.	معدتي ثقيلة.
أعد ذلك , من فضلك .	عيدها، لو سمحت.	أعيد هاد, لو سمحت.
سآخذ صورة لجاك دانيلز .	راح آخذ صورة لجاك دانيلز.	رح آخذ صورة لجاك دانيلز.
هل لديكم أطباق ذات سعرات حرارية منخفضة ؟ فأنا أتبع نظاما غذائياً حالياً .	عندكو وجبات قليلة الكالوريز ؟ أنا ماشية بدايت هالأيام.	عندكم أكل بسعرات حرارية قليلة؟ أنا أتبع نظام غذائي هسا.
ما هي الفوارق بين هذه الفنادق ؟	شو الفرق بين هاي الفنادق؟	شو الفرق بين هاي الفنادق؟
لم أقم بالحجز .	ما عملت حجز.	ما حجزت.
هل لديك أية فكة لعداد الانتظار ؟	عندك عملة للبارك ميتر؟	عندك أي فكة لعداد الانتظار؟
أيهما تفضل , داكن أم فاتح ؟	شو بتحب أكثر, غامق أو فاتح؟	شو بتحب أكثر, غامق ولا فاتح؟
حسناً سيدي . وما الحلو الذي تريد أن تختم به الطعام ؟	طيب يا استاذي.. شو الحلو اللي بدك تختم فيه الأكل ؟	ماشي سيدي. شو الحلو اللي بدك تختم فيه الأكل؟
إنني أسجل لخروجي من الفندق . هلا أرسلت خادماً إلى أعلى ؟	أني بعمل تشيك اوت. ممكن تودي عامل لفوق؟	أنا أسجل لخروجي من الفندق. بتقدر تبعثلي خادما فوق؟
كيف يمكنني الذهاب إلى ديزني لاند ؟	شلون بقدر أروح على ديزني لاند؟	كيف بقدر أروح على ديزني لاند؟
الآن ، هذه اللوحة خاصة جداً . رسمها تسوروتارو كاتاأوكا . إنه معروف بأنه فنان عالمي .	هسا، هاي اللوحة كثير مميزة. رسمها تسوروتارو كاتاأوكا. معروف هاذ فنان عالمي.	هسا ، هاي اللوحة خاصة كثير. رسمها تسوروتارو كاتاأوكا. معروف بأنه فنان عالمي.
هذه المظلة يمكن استخدامها كعصا للسير .	هاي الشمسية بقدر استخدمها كعصاية.	هاي المظلة ممكن تستخدم عصا للسير.
لأن الصيف في اليابان عادة ما يكون شديد الحرارة ، ولم يكن لدينا تكييف هواء قديماً .	لأنه الصيف باليابان عادة بكون حامي كثير، وما كان عندنا مكيف هوا زمان.	الصيف باليابان عادة يكون حامي ، وما كان عنا تكييف قديم.
الشيء نفسه لي ، من فضلك .	ونفس الشي إلي ، لو سمحت.	نفس الشي الي ، لو سمحت.
يوم الصحة الرياضية هو يوم العاشر من أكتوبر وهو إجازة قومية الغرض منها تحسين صحة المواطنين .	يوم الصحة الرياضية بعشرة عشرة بكون عطلة وطنية عملوه عشان يرفعوا مستوى الصحة عند الناس.	يوم الصحة الرياضية هو يوم عشرة من شهر عشرة وهو اجازة قومية هدفها تحسين صحة الناس.
هل من الممكن أن تنظف المنضدة من فضلك ؟	ممكن تنظف الطاولة، لو سمحت؟	ممكن تنظف الطاولة لو سمحت؟
يوجد عصير أناناس وبرتقال وطماطم .	في عصير أناناس و برتقال و بندورة.	في عصير أناناس و برتقال و بندورة.
أود الإقامة بهذه الغرفة ليلة واحدة أخرى .	بدي أظل بهاي الغرفة ليلة ثانية.	بدي أسكن بهاي الغرفة ليلة ثانية.
ثمانية دولارات . وهنا تأتي واحدة حالا .	ثمن دولرات. وهون بتيجي وحدة هسا.	ثمانية دولارات. وهاي تيجي وحدة هسا.
هذا حسن بالنسبة لي . في الواقع أحب أن أدخن .	هاذ تمام بالنسبة إلي . بصراحة أني بحب أدخن.	هاظ كويس بالنسبة الي. بصراحة بحب أدخن.
المكان كان على كرسي في البهو .	المكان كان عكرسي باللوبي.	المكان كان على كرسي بالبلكونه.
أشعر بصداع خفيف .	حاس بصداع خفيف.	حاس بصداع خفيف.
ألو ، اسمي أودا . عندي حجز الليلة ، لكن سوف أتأخر في القدوم . لهذا من فضلك اتركوا لي الحجز .	مرحبا، اسمي أودا. عندي حجز هالليلة، بس راح يتأخر وصولي. يرجـى خليكو الحجز لي.	ألو، إسمي أودا. عندي حجز الليلة، بس رح أتأخر بالقدوم. لهيك لو سمحت خليلي الحجز.
أين قسم السفر ؟	وين قسم السفر؟	وين قسم السفر؟
هل لديك أي صورة لبطاقة هوية ؟	عندك اي صورة للهوية؟	عندك صورة لبطاقة الهوية؟
هل لك أن تعطيني إشارة بالضوء عندما تكون فيها ؟	بتقدر تعطيني إشارة بالضو لما تكون فيها؟	ممكن تعطيني إشارة الضو لما تكون فيها؟
أريد فحص هذه الحقائب المتجه إلى طوكيو , من فضلك .	بدي اتفقد هالشناتي اللي رايحة لطوكيو، لو سمحت.	بدي افحص هاي الشناتي اللي رايحة على طوكيو, لو سمحت.
ثمة شئ خطأ في آلة التهوية هذه .	في اشي غلط بالمروحة هاذ.	في اشي غلط بالهواية هاي.
منذ هذا الصباح .	من الصبح.	من الصبح.
من فضلك قس حجم حذائي .	لو سمحت قيس حجم كندرتي.	لو سمحت إحصلي حجم حذائي.
أوافق . إنه أحد الأماكن المفضلة لي .	موافق. هاذ واحد من احلا الاماكن عندي.	أوافق. هو واحد من الأماكن المفضلة إلي.
لابد أن تكون هادئة .	لازم تكوني هادية.	لازم تكون هادئة.
أريد مطفأة سجائر .	بدي منطفة سجاير.	بدي قزازة دخان.
أود أن أتتناول طبقا مثل هذا .	بدي أوكل صحن زي هاظ.	بدي اكل صحن زي هاد.
أين توجد أقرب مغسلة ؟	وين اقرب مغسلة؟	وين أقرب مغسلة؟
هل لي بجدول مواعيد ؟	أعطيني جدول المواعيد؟	ممكن جدول مواعيد؟
من فضلك اعطني هذه .	لو سمحت اعطيني هاي.	لو سمحت أعطيني هاي.
هل يمكن أن أذهب لمشاهدة المعالم أثناء رسو السفينة في الميناء ؟	بقدر أروح اشوف المناظر لما السفينة تكون راسية بالمينا؟	بقدر اروح اشوف المعالم وقت ما السفينة تحط بالمي؟
هل يوجد مكان يقبل تنظيف الملابس في أيام الآحاد ؟	في أي مكان بقبل طلبات الغسيل كل يوم أحد؟	في مكان بقبل تنظف فيه الأواعي أيام الأحد؟
هل توجد خدمة نقل بالحافلات إلى متحف فورد ؟	في خدمة باصات بتروح على متحف فورد؟	في خدمة نقل بالباصات لمتحف فورد؟
أنا من النرويج .	أني من النرويج.	أنا من النرويج.
عشرة طوابع من فضلك .	عشر طوابع لو سمحت.	عشر طوابع لو سمحت.
هل يمكنك أن تجر سيارتي ؟	ممكن تجرب سيارتي؟	بتقدر تجر سيارتي؟
إنه سمك ثعبان مشوي مع مرقة خاصة فوق سلطانية من الأرز .	هاذ سمك الانقليس مع صلصة خاصة محطوطة فوق سلطانية الرز.	هو سمك ثعبان مشوي مع مرقة خاصة فوق سلطانية من الرز.
هل يمكنني إعادتها في مدينة مختلفة ؟	بقدر أرجعها بمدينة ثانية؟	بقدر ارجعها على مدينة ثانية؟
عندي الدواء الخاص بي .	عندي الدوا تاعي.	عندي الدوا تبعتي.
هل لديكم أفلام للصيف ؟	عندكو أفلام للصيف؟	عندكم أفلام للصيف؟
هل تريد أن تذهب للتسوق معي بعد الظهر ؟	بتحب تيجي معي نتسوق بعد الظهر؟	بدك تروح معي للتسوق بعد الظهر؟
نعم ، سيدي . كيف تريدني أن اقطعها ؟	أيوة ، يا سيدي . كيف بدك إني أقصها؟	اه ، سيدي. كيف بدك تقطعها ؟
عندما أعود ثانية إلى اليابان ، سأكتب خطاباً . وإذا كان لديك وقت ، من فضلك أرسل لي خطاباً .	لما أرجع مرة ثانية لليابان، رح أكتب رسالة. وإذا كان عندك وقت، تكرم ابعثلي انا رسالة.	لما أرجع مرة ثانية لليابان، رح أكتب رسالة. وإذا عندك وقت، لو سمحت ابعتلي الخطاب.
فراولة ، من فضلك .	فراولة، لو سمحت.	فراولة ، لو سمحت.
هل تفضل ماسكات للشعر أصغر أم أكبر ؟	بتحبي القناع للشعر أصغر ولا أكبر؟	بتحب ماسكات للشعر أصغر ولا أكبر؟
بالتأكيد . متى تود أن تلعب جولف ؟	طبعاً. أميت بدك تلعب جولف؟	أكيد. متى بدك تلعب جولف؟
من فضلك اجعل الجزء العلوي أطول قليلاً .	من فضلك خلي الجزء الفوقاني أطول شوي.	لو سمحت خلي الجزء العلوي أطول شوي.
كم أوقية من العطر أستطيع الحصول عليه من غير رسوم ؟	كم وقية من العطر بقدر أوخذها بدون رسوم ؟	كم أوقية عطر بقدر أوخذ منه بدون رسوم؟
معذرة , قم بالضغط على مصراعي النافذة الخشبيين , من فضلك .	عفواً، نزل اباجور الشباك الخشب , لو سمحت.	عفواً, اكبس على مصاري الشباك الخشبيين, لو سمحت.
لدي ثلاث حقائب .	عندي ثلث شناتي.	عندي ثلاث شنتات.
هذا البيت يبدو مريحا للمعيشة فيه , أليس كذلك ؟	هاد البيت مبين كثير مريح العيشة فيه، مش هيك؟	هاظ البيت مبين مريح للمعيشة فيه, صح ؟
أريد أن أغسل ملابسي في وقت لاحق اليوم .	بدي أغسل وعيتي بوقت ثاني اليوم.	بدي اغسل اغراضي بوقت ثاني اليوم.
أرجو ذلك .	بتمنى هيك.	بتمنى هيك.
واحد لنيويورك ، من فضلك .	واحد لنيويورك، إذا سمحت.	واحد لنيويورك، لو سمحت.
لا ، إنها لا تشمل الضريبة ومصاريف الخدمة .	لا، هي ما بتشمل الضريبة ومصاريف الخدمة.	لا، مش شاملة الضريبة و مصاريف الخدمة.
قم بها بطريقتك .	اعملها بطريقتك.	قم بها بطريقتك.
كم تستغرق مشياً على الأقدام ؟	قديش بتوخذ وقت مشي عالجرين؟	قديش بدك مشي على الاقدام؟
هل يمكنني الحصول على برنامج ؟	بقدر آخذ برنامج؟	بقدر اخد برنامج؟
من فضلك سجل عنوان الاتصال بك هنا .	من فضلك اكتب عنوانك للتواصل معك هون.	لو سمحت سجل عنوان الاتصال معك هون.
نعم ، يا سيد تاناكا هناك رسالتان لك .	أيوة، يا سيد تاناكا، في عندك رسالتين.	اه ، يا استاذ تاناكا في رسالتين إلك.
هل لي في شيء من لحم الخنزير والبيض ؟	ممكن شوية من لحم الخنزير والبيض؟	ممكن تعطيني شوية لحم الخنزير والبيض؟
إذا حدث ذلك ، من فضلك أتصل بي .	اذا صار هيك ، لو سمحت رنلي .	إذا صار هيك، لو سمحت رنلي.
أوه ، آسف لأني أزعجتك .	اووه، معذرة الك ازعجتك.	اه ، آسف لأني ازعجتتك.
هل يمكن أن أقيس مقاس تسعة .	ممكن أقيس مقاس تسعة ؟	بقدر أقيس مقاس تسعة؟
ملابسه دائماً موضة قديمة .	هدومه دايما موضة قديمة.	ملابسه دايما موضة قديمة.
هلا حجزت لي تاكسي الساعة السادسة صباح غد , من فضلك ؟	ممكن تحجزلي تكسي الساعة ستة الصبح لبكرا ، لو سمحت؟	ممكن تحجزلي تاكسي الساعة ستة الصبح بكرا, لو سمحت؟
إنه صحيح هنا .	هو صحيح هون.	صح هون.
هل يمكن أن تدخل معه فكة صغيرة ؟	بتقدر ادخل معه شوية فراطة؟	ممكن تدخل معه فكة صغيرة؟
أنا حقا آسف .	أني جد آسف.	أنا جد آسف.
لقد طلبت ذلك .	طلبت هاظ.	طلبت هيك.
ما تكلفة هذا في اليوم ؟	قديش تكلفته ليوم واحد؟	قديش بتكلف هاظ باليوم؟
لا توجد أية مشاكل .	ما في أي مشاكل.	ما في مشاكل.
أجل . سنصل في الثامنة حسب التوقيت المحلي .	أها. رح نوصل الساعة ثمنية بالتوقيت المحلي.	أه. رح نوصل عالساعة ثمنية حسب التوقيت المحلي.
هل لديك واحد أكبر ؟	عندك واحد أكبر؟	عندك واحد أكبر؟
أنا كينجي .	أني كينجي.	أنا كينجي.
إنه المبنى الثاني على يسار هذا المبني الأبيض .	البناية الثانية على يسار البناية البيضا.	هو المبنى الثاني على يسار هاد المبنى الأبيض.
أعطني قطعة لحم الخنزير هذه ، ولكن ليس بسمك تلك .	أعطييني قطعة لحمة الخنزير هاي، بس ما تكون سميكة مثل هذيك.	أعطيني قطعة لحم الخنزير هاي، بس مش سمكها هاي.
لدي موعد آخر .	عندي موعد ثاني.	عندي موعد ثاني.
لدي غرفة جاهزة لك في جراند هويتل . هل تستطيع الذهاب إلى هناك ؟	عندي غرفة جاهزة إلك بالجراند هوتيل. بتقدر تروح لهناك؟	عندي غرفة جاهزة لك في جراند هويتل. بتقدر تروح هناك؟
أرني واحدة لإحدى الشابات .	وريني وحدة لوحدة من الصبايا.	فرجيني وحدة من الشابات.
أود أن أحجز غرفة لهذه الليلة .	بدي أحجز غرفة لهاي الليلة.	بدي احجز غرفة لهاي الليلة.
لقد خلعت البنطلون .	شلحت البنطلون.	خلعت البنطلون.
إنها رائعة .	هاي روعة.	هاي حلوة.
أهذه هي الحافلة التي توصل إلى وسط المدينة ؟	هاظ هو الباص اللي بوصل لوسط البلد؟	هاي هي الباص اللي بوصل لوسط البلد؟
أتظن ذلك ؟	بتظن هيك؟	بتوقع هيك؟
أود أن أرسله عن طريق البريد .	حاب أبعثه عن طريق البريد.	بدي أبعته عن طريق البريد.
أشكرك ثانية لأنك ذكرتني . هل يميل كثير من الناس أن ينسوا توقيع أسمائهم ؟	بشكرك مرة ثانية عشان ذكرتني. بروح كثير من الناس تنسى توقع ع أسمائهم ولا شو؟	شكرا مرة ثانية لأنك ذكرتني. كثير الناس بنسى يوقعوا أسمائهم؟
هلا أرسلت تاكسي إلى المدخل الرئيسي لـ ويستمانستر مول ؟	ممكن تودي تكسي للمدخل الرئيسي بويستمانستر مول؟	بتقدر تبعث تاكسي على المدخل الرئيسي لـ ويستمانستر مول؟
هل لديكم أية جولة سياحية أخرى ؟	عندك أي رحلة ثانية؟	عندكم جولة سياحية ثانية؟
السيارة تصدر صاخبا غريبا .	السيارة بطلع صوت غريب وعالي.	السيارة بتصدر صوت غريب.
هذه سبعون دولار .	هاي سبعين دولار.	هاي سبعين دولار.
أنا شديد الحساسية للقطط .	أني بتحسس كثير من البسس.	أنا كثير حساس من القطط.
لا . قليلاً في الأمام . هناك ، نعم .	لا. شوي لقدام. هناك، إيوه.	لا. شوي قدام. هناك ، اه.
ركن المدخنين ، من فضلك . وشباك بجوار النافذة ، من فضلك .	ركن الشيشانيين، إذا سمحت. وشباك جمب النافذة، إذا سمحت.	ركن المدخنين، لو سمحت. وشباك جنب الشباك، لو سمحت.
هل يكلفني دخول هذا المبنى أي أموال ؟	بدفع أي مصاري إذا فتت على هاي العمارة؟	بتكلف دخول هاد المبنى أي مصاري؟
سأكون هنا حتى التاسعة . يحدوني الأمل أن تتمكن من القبض على المجرم في أقرب وقت ممكن .	راح أظل هون للساعة تسعة. بتمنى إنكم تمسكوا المجرم بأسرع وقت.	رح أكون هون على التسعة. بدي ياها تقبض على المجرم بأسرع وقت ممكن.
شكراً لك . من فضلك عاود مرة أخرى .	مشكور. يلا جرب مرة ثانية من فضلك.	شكراً الك. لو سمحت ارجع مرة ثانية.
فاتتني محطتي .	راح علي الموقف.	فاتتني محطتي.
أين يمكنني أن أقيم أثناء الجولة ؟	وين ممكن أسكن خلال الرحلة؟	وين بقدر أسكن أثناء الجولة؟
إنه لمن دواعي السرور أن أتحدث معك .	إنسريت بالحكي معك.	كثير مبسوط إني حكيت معك.
أي مقاس تريد ؟	شو السايز اللي بدك ياه؟	أي مقاس بدك؟
بالتأكيد ، هل تريد تسريحة متموجة دائما ؟	أكيد، بدك اياه كيرلي دايما؟	أكيد، بدك تسريحة متموجة دايما؟
إلى اليسار ، من فضلك .	على اليسار، لو سمحت.	لليمين ، لو سمحت.
لقد أتلفت حقيبتي .	دمرت شنتتي.	ضيعت شنتتي.
البيتزا لذيذة . من صنعها ؟	هاي البيتزا زاكية. مين عملها؟	البيتزا حلوة. من صنعها؟
أخشى أن أسأل ، لكن ماذا تعني ؟	بخاف اسأل، بس شو قصدك؟	بخاف اسأل، بس شو قصدك؟
لا ، من فضلك اجلس وانتظر . سأعود بعد قليل .	لا، لو سمحت اقعد واستنى. راح أرجعلك بعد شوي.	لا، لو سمحت اقعد واستنى. برجع بعد شوي.
الكعب مرتفع جداً .	الكعب عالي كثير.	الكعب مرتفع كثير.
كم سيستغرق إصدار التأشيرة لي ؟	قديش الفيزا بدها وقت عشان تطلع؟	قديش بدها وقت اصدار الفيزا الي؟
لقد تعطلت سيارتي .	خربت سيارتي .	تعطلت سيارتي.
كيف أثر الركود على الشركة ؟	شلون أثر الركود عالشركة ؟	كيف أثر الركود على الشركة؟
توجد رحلات جوية على شركات جال وانا التي تقلع في الساعة العاشرة وخمسة وخمسين دقيقة . ولكن , للأسف كلتا الرحلتين محجوزتان .	في طيارات على شركات جال وانا اللي بتغادر الساعة عشرة وخمسة وخمسين دقيقة. بس، للأسف الطيارتين مفللات.	في رحلات جوية على شركات جال وانا اللي بطلع عالساعة عشرة وخمسة وخمسين دقيقة. بس للأسف كل الرحلتين محجوزتين.
هل هذا سيفسد ؟	هاذ رح يخرب؟	هاظ رح يفسد؟
هل يمكنك أن تخبرني بقيمة هذه المكالمة ؟	بتقدر تحكيلي تكلفة هاي المكالمة؟	بتقدر تحكيلي كم سعر هاي المكالمة؟
من الأفضل أن تضبط المرآة العاكسة للرؤية الخلفية .	أحسن شي تزبط المراية الخلفية.	أحسنلك تضبط المرايا الخلفية.
كم أجرة التاكسي حتى هذا الفندق ؟	كم أجرة التكسي لعند الفندق؟	قديش أجار التكسي لهون الفندق؟
أريد مزيلا لطلاء الأظافر .	بدي أسيتون للمناكير.	بدي كريم للأظافر.
ما هي مكونات هذا الطبق ؟	شو مكونات هالصحن؟	شو مكونات هاي الوجبة؟
متى ينبغي أن آتي ؟	متى لازم آجي ؟	متى لازم اجي؟
هل يمكن أن تخبرني عن الأماكن الشيقة هنا ؟	ممكن تحكيلي عن الأماكن الحلوة هون؟	بتقدر تحكيلي عن الأماكن الحلوة هون؟
حسنا ، اضغط تسعة وصفر واحد واحد ، ثم الكود الخاص بالبلد ورقم الهاتف .	طيب، إكبس تسعة وصفر واحد واحد، وبعدين الكود تبع البلد ورقم التلفون.	تمام، اكبس تسعة وصفر واحد، بعدين الكود الخاص بالبلد ورقم التلفون.
أعتقد أنك ارتكبت خطأً . الغرفة دفع ثمنها مسبقاً . معي إيصال .	بظن إنك غلطت. الغرفة حاسبت عنها قبل. معي وصل.	بتوقع إنك غلطت. الغرفة دفعت حقها قبل هيك. معي وصل.
هل يمكنك أن تتحرك بهذا الاتجاه ؟	بتقدر تمشي بهالجهة؟	بتقدر تتحرك بهاد الاتجاه؟
سيغادر قطارك من الرصيف رقم ثمانية .	رح يطلع قطارك من السكة رقم ثمانية.	رح يطلع القطار من الرصيف رقم ثمانية.
أريد غرفة أخرى .	بدي غرفة ثانية.	بدي غرفة ثانية.
لماذا يحدث هذا ؟	ليش بصير هاذ ؟	ليش هيك بصير؟
ما الرقم الذي أطلب منه هنا ؟	شو الرقم اللي بطلب منه هون؟	شو الرقم اللي بدي اياه هون؟
هل يوجد مطعم أرخص قريب من هنا ؟	في مطعم رخيص قريب من هون؟	في مطعم أرخص قريب من هون؟
هل يوجد مطعماً يمكنك أن تزكيه بالقرب من هنا ؟	في مطعم بتنصح فيه قريب من هون؟	في مطعم بتقدر تنصحني فيه قريب من هون؟
أوبرا ميتروبوليتان .	أوبرا المتروبوليتان.	أوبرا ميتروبوليتان.
أين المصعد ؟	وين الأصنصير؟	وين المصعد؟
هل يمكنك أن ترني أشياء أخري ذات تصميمات مختلفة .	ممكن توريني شغلات ثانية بأشكال غير؟	بتقدر تفرجيني أشياء ثانية بتصاميم مختلفة.
ليس بمقدورك تغيير وظيفتك بسهولة .	ما بتقدر تغير شغلك ببساطة.	مش قادر تغير وظيفتك بسهولة.
ماذا تسمون هذا بالإنجليزية ؟	شو بتسموه هاذ بالإنجليزي؟	شو بتسموا هاظ بالإنجليزي؟
سأصل في التاسع من مارس وأغادر في الرابع عشر .	راح أوصل بتسعة ثلاث وراح أروّح بأربعطعش.	رح أوصل يوم تسعة من شهر ثلاثة و بطلع يوم أربعة عشر.
هل ستحدد موعداً للخروج معي ؟	بدك تحدد موعد لتطلع معي؟	بدك تحددلي موعد عشان أطلع معي؟
لم اسمع بهذا العنوان من قبل بالقرب من هنا .	ما سمعت بهاذ المكان قبل هيك بالمنطقة هون .	ما سمعت بهاد العنوان من قبل هون.
سوف أحضر لك العرض الأسبوع القادم .	بدي اجهزلك العرض الاسبوع الجاي.	رح أجيبلك العرض الأسبوع الجاي.
صديقي مريض جداً . هل تستطيع أن تطلب دكتور ، من فضلك ؟	صاحبي كثير مريض. ممكن تطلب الدكتور، لو سمحت؟	صاحبي مريض كثير. بتقدر تطلب دكتور، لو سمحت؟
هل أخذت تذكرة الحافلة ؟	اخذت تذكرة الباص؟	أخذت تذكرة الباص؟
يوجد لدى حوالي ألفي وخمسمائة دولار بالين الياباني .	أنا معي حوالي ألفين وخمسميت دولر بالين الياباني.	عندي حوالي ألفي وخمسمية دولار بالين الياباني.
هل يمكنني استئجار مرشداً يتحدث اللغة اليابانية ؟	ممكن أستأجر دليل بسولف ياباني؟	بقدر أستأجر دليل سياحي بيحكي ياباني؟
هذا بعينه ما كنت أبحث عنه .	هاي بالزبط اللي كنت بدور عليه.	هاظ هو نفس اللي كنت ادور عليه.
رقم مقعدي دي اثنا عشر . أين هو ؟	رقم كرسيي دي اثنعش. وين هو؟	رقم كرسيي اثنعش. وين هو؟
فينس وليندا يريدان أن يبقيا بمفرديهما ، لذا أخشى أنني لا بد أن أبقى هنا هذه الليلة .	فينس وليندا بدهم يظلوا لحالهم، فبخاف انو لازم اظل هون الليلة.	فينس وليندا بدي يضلوا لوحدهما، عشان هيك بخاف اني لازم أظل هون الليلة.
إنها تبعد حوالي تسعة وتسعون ميلا .	هي بتبعد حوالي تسعة وتسعين ميل.	هي تبعد حوالي تسعة وتسعين ميل.
حسناً ، تم إعادة التأكيد على حجزك .	ماشي، اتأكدنا من حجزك مرة ثانية.	تمام، أعيد التأكيد على حجزك.
حسناً ، فلنق نظرة عليك .	طيب ، خلينا نطل عليك .	تمام، خلينا نشوفلك.
هل يجب على أن أجيب بـ نعم أو بـ لا ؟	لازم اجاوب بـ اه أو بـ لأ ؟	لازم أجيب بنعم أو لا؟
من فضلك ، بدلي شيك المسافرين إلي نقود .	لو سمحت اصرفلي هاد الشك السياحي كاش.	لو سمحت، بدلي شيك المسافرين للصرافة.
من فضلك دلني على أرخص وسيلة للذهاب إلى سان فرانسيسكو .	من فضلك دلني على أرخص طريقة حتى أروح على سان فرانسيسكو.	لو سمحت دلني على أرخص طريقة عشان أروح على سان فرانسيسكو.
أريد غرفة مفردة بحمام لقاء ثمانين دولارا ، من فضلك .	بدي غرفة فردية مع حمام بـثمانين دولار, لو سمحت.	بدي غرفة فردية بحمام مقابل ثمانين دولار، لو سمحت.
من فضلك ، هل رسمت لي خريطة بسيطة من هنا ؟	من فضلك، بتقدر ترسملي خريطة سهلة من هون؟	لو سمحت، رسملي خريطة بسيطة من هون؟
ليس لدي أية مضارب أو أحذية .	ما عندي لا مظارب ولا أحذية.	ما عندي مضارب أو أحذية.
أوه ، يبدو أنني افقد شيء ما كل وقت أسافر فيه .	أوه، شكلني بضيع اشي كل مرة بسافر فيها.	اوه، شكلو اني فاقد اشي كل وقت أسافر فيه.
أجل ، إنها مفتوحة من التاسعة حتى التاسعة .	أها ، هي فاتحة من الساعة تسعة للساعة تسعة.	أه ، هي مفتوحة من التسعة للتسعة.
سيأتي القطار السريع التالي بعد ساعة .	راح يجي القطار السريع الجاي بعد ساعة.	رح يجي القطار السريع الجاي بعد ساعة.
مرحبا . كيف حالك ؟	مرحبا . كيف حالك؟	مرحبا. كيف حالك؟
تاريخ الانتهاء تسعة عشر من مارس تسعة وتسعين .	تاريخ انتهاء الصلاحية تسعطعش من شهر ثلاث التسعة وتسعين.	تاريخ الانتهاء تسعةطعش من شهر ثلاثة تسعة وتسعين.
هلا احتفظت بهذا لي ؟	ممكن تظبلي هاد؟	ممكن تخليلي هاد؟
هل تقبل بالين الياباني ؟	بتوخذ بالين ياباني؟	بتقبل بالين الياباني؟
من فضلك ، اكتب رقم الغرفة في الخلف .	من فضلك ، اكتب رقم الغرفة بقفى الورقة.	لو سمحت، اكتب رقم الغرفة ورا.
هل يمكنك أن تصلح ذلك ؟	بتقدر تصلح هاي؟	بتقدر تصلحلي هاد؟
سيداتي سادتي ، لدينا على متن رحلتنا اليوم مضيفين يتحدثون اليابانية يمكن التعرف عليهم من خلال الشارة التي يلبسونه . إذا كنت تعرف أي شخص يريد مساعدة في الترجمة ، من فضلك دعنا نعرف .	سيداتي وسادتي،برحلتنا اليوم، عنا مضيفين بحكوا ياباني بتعرفوهم من الباجة اللي لابسينها. إذا بتعرف إنه أي حد بحتاج مساعدة بالترجمة، لو سمحت خلينا نعرف.	سيداتي سادتي، عنا مضيفين بيحكيوا ياباني ممكن نتعرف عليهم من الشارة اللي بلبسوها. اذا بتعرف أي حدا بدو يساعدني بالترجمة، لو سمحت خلينا نعرف.
هل يجب أن أدفع الرسم الإضافي عندما أدخل مبنى ؟	لازم أدفع رسوم ثانية بس أفوت عأي مبنى؟	لازم أدفع رسوم زيادة لما أدخل مبنى؟
لقد انكسرت السنة .	انكسرت السنة.	كسرت السنة.
تبدو البونساي كهواية شخص هرم .	شكلها البونساي هواية الختيار.	شكلها البونساي زي هواية واحد هرم.
لدينا غرفة مزدوجة بحمام بخمسة و ثمانين دولار .	عنا غرفة مزوجة مع حمام بخمسة وثمنين دولار.	عنا غرفة مزدوجة بحمام بخمسة و ثمانين دولار.
هل هذه من نوع ليفي خمسة صفر المعتمدة ؟	هاي من نوع ليفي خمسة صفر الأصلية؟	هاي من نوع ليفي خمسة صفر المعتمدة؟
هل يمكن أن أبيت عندكم الليلة ؟	بقدر أبات عندكو الليلة؟	ممكن أظل عندكو الليلة؟
هل تود منضدة في المطعم الرئيسي أو في غرفة خاصة يا سيدي ؟	سيدي، بتحب طاولة بالمطعم الرئيسي ولا بغرفة خاصة؟	بدك طاولة بالمطعم الرئيسي أو بغرفة خاصة يا سيدي؟
مائة بالمائة قطن .	مية بالمية قطن .	مية بالمية قطن.
إنها لذيذة جداً .	كثير طيبة.	هي زاكي كثير.
هل أستطيع التحدث مع المدير ؟	بقدر أحكي مع المدير؟	بقدر احكي مع المدير؟
أنا آسف ، هو ليس بالداخل الآن .	أني آسف، هو مش جوا هسا.	أنا آسف ، هو مش جوا هسا.
أريد غرفة بسريرين . ما ثمن الغرفة في الليلة ؟	بدي غرفة بتختين. قديش تكلفة الغرفة بالليل؟	بدي غرفة بسريرين. قديش حق الغرفة بالليلة؟
ابقى على الخط وانتظر لحظة من فضلك .	خليك على الخط و استنى شوي من فضلك.	خليك عالخط واستنى شوي لو سمحت.
هل يمكنني أن أرسل أي ميل واحد فقط قيمته دولار .	بقدر أبعث أي ميل واحد تكلفته بس دولر؟	بقدر أبعث ميل واحد بس قيمته دولار.
من أين تغادر الحافلات لمشاهدة المعالم ؟	من وين بتطلع الباصات حتى نشوف المناظر؟	من وين بطلع الباص عشان يشوف المعالم؟
هل لديك ألوان أخرى من هذا ؟	عندك ألوان ثانية من هاذ؟	عندك الوان ثانية من هاد؟
اذهب إلى نادي رياضي كل يومين .	روح عالجيم كل يومين.	روح على نادي رياضي كل يومين.
تم الفصل بين مقاعدنا .	صار فصل بين كراسينا.	فصلت بين كراسينا.
هل لك أن تخبرني عن مكان تحليق الطائرة الآن ؟	بتقدر تحكيلي وين بطير الطيارة هسا؟	ممكن تحكيلي وين مكان تحليق الطيارة هسا؟
كيف ترغب في إجراء المكالمة ؟	شلون بدك تعمل المكالمة؟	كيف بدك ترنلي؟
أفهم ذلك . أحاول استئجار سيارة سيتروين .	بفهم هالاشي. بحاول أستأجر سيارة سيتروين.	فاهم هاي. بحاول أستأجر سيارة سيتروين.
هذه هي الغرفة اثنا عشر صفر سبعة .	هاي هي الغرفة اثنعش صفر سبعة.	هاي الغرفة اثنعش صفر سبعة.
هل لك أن تأخذ هذا ، من فضلك ؟	ممكن توخذ هاذ، لو سمحت؟	ممكن توخذ هاظ، لو سمحت؟
كم عمر هذا الصبي ؟	قديش عمر هالولد؟	قديش عمر هاذ الصبي؟
قارب مع مرشد ، من فضلك .	قارب مع مرشد ، لو سمحت.	قارب مع مرشد، لو سمحت.
القهوة غير محسوبة .	القهوة مش محسوبة؟	القهوة مش محسوبة.
لقد أضعت تذكرة الطيران الخاصة بي .	انا ضايع تذكرة الطيران حقتي.	ضيعت تذكرة الطيران تبعتي.
نعم , في بادئ الأمر ، اغسليها على منفصلة .	أيوة, بالأول, غسليها لحالها.	اه, اول اشي غسلها منفصلة.
هل يمكنني أن التقط بعض الصور ؟	ممكن اوخذ شوية صور؟	بقدر أصور شوية صور؟
هلا فتحت هذه الحقيبة ، من فضلك ؟ ماذا يوجد هنا .	بتقدر تفتح هاي الشنطة، لو سمحت؟ شو لقيت فيها هون؟	ممكن تفتح هاي الشنتة، لو سمحت؟ شو في هون؟
ما نوع هذه الموسيقى ؟	شو نوع هاي الموسيقى؟	شو نوع هاي الموسيقى؟
أريد بعض الكريم للأيدي .	بدي شوية كريم للإيد.	بدي شوية كريم للأيادي.
مائة غير المدخنين من فضلك .	مية غير اللي بدخنوا، لو سمحت.	مية مش المدخنين لو سمحت.
من فضلك أعطني بعض الفكة .	لو سمحت اعطيني شوية فراطة.	لو سمحت أعطيني فراطة.
بالتأكيد . لدينا بعض الماركات الأمريكية الأصلية الجميلة . للكتب .	أكيد. عنا شوية ماركات أمريكية أصلية حلوة. للكتب.	أكيد. عنا ماركات أمريكية أصلية حلوة للكتب.
لدي وصولها ، سوف ندفع ثمن شحنها إلى عنوان منزلك .	لما توصل. راح ندفع حق الشحن لعنوان بيتك.	عندي وصولها ، رح ندفع حق شحنها على عنوان بيتك.
إنها مشغولة .	هيه مشغولة.	هي مشغولة.
سرقت حقيبتي في الشارع .	انسرقت شنتي بالشارع.	سرقت شنتتي بالشارع.
لم تصنع هذه باليابان ، أليس كذلك ؟	ما صنعت هاي باليابان، صح؟	ما صنعتها اليابان، صح؟
سيبدأ الصعود على متن الطائرة الساعة الرابعة والنصف لذلك من فضلكم كونوا هناك قبل هذا الموعد .	رح يبلش الصعود على الطيارة الساعة أربعة ونص . لذالك لو سمحتو كونو هون قبل هذا الوقت.	رح يطلع الطيارة الساعة اربعة ونص، لو سمحتوا كونوا هناك قبل هاد الموعد.
نحن هنا لمدة يوم .	إحنا هون لمدة يوم.	احنا هون ليوم.
لقد فقدت شيكاتي السياحية .	ضيعت الشيكات السياحية تبعتي.	ضيعت شيكاتي السياحية.
ما أنواع الخضراوات الموجودة لديك ؟	شو هي الخضرة اللي عندك؟	شو أنواع الخضراوات اللي عندك؟
يجب أن أنتقل إلى عربة مكيفة واحد صفر صفر . هل هذا ممكن ؟	بدي انتقل لعرباية مكيفة واحد صفر صفر. ممكن؟	لازم أروح على سيارة مكيفة واحد صفر صفر. ممكن؟
نعم ، حجز لمدة ستة أيام من فضلك ، بدء من الثالث والعشرين من يوليو .	ايوه، حجز لست أيام لو سمحت، ببلش من ثلاث وعشرين ستة.	اه ، حجز لست ايام لو سمحت ، من ثلاث وعشرين سبعة.
من أي مكان يمكنني أن أغير القطار الذي يوصلني إلى إدنبره ؟	منين بقدر أغير القطار اللي بوصلني لادنبرة؟	من أي مكان بقدر أغير القطار اللي بوصلني على إدنبرة؟
أكثر منتجاتنا بيعت عبر السنوات الأربع الماضية هي الآلة الناسخة طراز أ . أكس أربعة خمسة صفر .	أغلب اللي بعناه من منتجاتنا على مرّ الأربع سنين اللي فاتت هي الآلة الناسخة، طراز أ . أكس أربعة خمسة صفر.	أكثر منتجاتنا بيعت خلال السنوات الأربع الماضية هي الآلة الناسخة طراز أ. أكس أربعة خمسة صفر.
آسف سأعود لاحقاً .	آسف. راح أرجع بعدين.	آسف رح أرجع بعدين.
هل يتحتم عليك كثيراً أن تعمل حتى ساعة متأخرة ؟	بتظطر كثير تشتغل لوقت متأخر؟	لازم تشتغل كثير لساعة متأخرة؟
هل لديك نفس هذا التصميم بكعب أعلى ؟	عندك نفس هاذ الديزاين بس كعب أعلى؟	عندك نفس التصميم بكعب أعلى؟
التكلفة ، من فضلك . هل تقبلون بطاقة فيزا ؟	الحساب ، لو سمحت. يتقبلو بطاقة فيزا؟	التكلفة ، لو سمحت. بتقبلوا فيزا ؟
من فضلك استلق هنا .	لو سمحت، اتمدد هون.	لو سمحت استلق هون.
اسمي ميتشكو تاناكا ، ورقم الرحلة إلى طوكيو هو خمسة ، صفر ، واحد .	اسمي ميتشكو تاناكا، ورقم الرحلة لطوكيو هو خمسة، صفر، واحد.	اسمي ميتشكو تاناكا، ورقم الرحلة لطوكيو خمسة، صفر، واحد.
آه ، كلا . من فضلك أسرع . إننا متأخرون .	آه، لأ. لو سمحت عجل، إحنا متأخرين.	آه، لا. لو سمحت أسرع. احنا متأخرين.
ما هي أفضل جولة حتى أرى أشهر الأماكن ؟	شو هي أحسن رحلة عشان أشوف أشهر الأماكن؟	شو أحسن جولة عشان أشوف أشهر الأماكن؟
حسنا . مقعدان من فضلك .	ماشي. كرسيين لو سمحت.	تمام. كرسيين لو سمحت.
أظن أنه بديع المنظر .	بظن انه منظره صاير حلو.	بتوقع إنه حلو المنظر.
بنطلون أخر ؟	بنطلون ثاني؟	بنطلون ثاني؟
سأجرب بعضاً من الشراب المثلج .	بدي أجرب شوي من العصير المثلج.	رح أجرب شوية شراب مثلج.
هل هذا هو الطريق الصحيح إلى المحطة المركزية ؟	هاد الطريق الصح للمحطة الرئيسية؟	هاظ هو الطريق الصح للمحطة المركزية؟
أريد شراء تذكارات لأصدقائي . أيمكن أن تُوصي ببعض منها ؟	بدي أشتري هدايا تذكارية لأصحابي. ممكن تنصحني بإشي؟	بدي اشتري تذكارات لأصحابي. بتقدر تنصحني بشمل منها؟
أريد الحصول على تأمين .	بدي تأمين.	بدي تأمين.
آوه إلقاء نظرة على صندوقك .	واو أنا حاب أشوف صندوقك.	آه شوف صندوقك.
إنها أربعة عشرة .	هاي أربعطعش.	هي أربعةطعش.
سأنتظر حتى يتاح الجلوس في التراس .	رح أستنا لحتى يصير الجلوس بالتراس ممكن.	رح أستنى حتى يطيب الجلوس بالتراس.
يمكنك أن تمكث في منزلي .	ممكن تفضل تقعد ببيتي.	بتقدر تقعد بالبيت.
هذا , من فضلك .	هاظ ، لو سمحت.	هاظ, لو سمحت.
من فضلك نظف هذا المعطف .	لو سمحت نظف هاظا الكبوت.	لو سمحت نظف هاظ الشوز.
شراب الشمام كحلاء ، من فضلك .	عصير الشمام كحلو ، لو سمحت.	شراب الشمام كحلاء، لو سمحت.
أخطط لتعلم الجولف .	بفكر أتعلم جولف.	بخطط أتعلم الجولف.
كان هذا مكسوراً بالفعل عندما فتحت الطرد .	كان هاذ مكسور فعلاً لما فتحت الطرد.	كان هاظ مكسور فعلا لما فتحت الطرد.
توقفت ساعتي .	ساعتي وقفت.	وقفت ساعتي.
أجل . إنها مشكلة تخلص من الفضلات .	أيوة. هاي مشكلة كب الزبالة.	أه. هاي مشكلة تخلص من الفضلات.
هناك محل لبيع الزهور في الطريق .	في محل ورد بالطريق .	في محل لبيع الزهور بالطريق.
هل السيدات يقبلن هذا ؟	الستات بقبلن بهاذ؟	السيدات بقبلن هاد؟
هل يمكننا ترك أشياءنا ما عدا الأشياء القيمة في الحافلة ؟	بنقدر نخلي اغراضنا هون، ماعيدا الأشياء الغالية، في الباص؟	ممكن نخلي أغراضنا ما عدا الأشياء الغالية بالباص؟
بمقدورك أن ترى واحداً عند " كارينجي هول " .	بامكانك تشوف واحد بقاعة كارنيجي.	بتقدر تشوف واحد عند " كارينجي هول ".
آسف جدا ، لكني أود تأجيل الميعاد .	آسف كثير، بس بدي أجل الموعد .	آسف كثير ، بس بدي أأخر الموعد.
أجل , يمكننا القيام بخدمتك بداية من السابعة .	اها، منقدر نخدمك من الساعة السابعة.	أه, بنقدر نخدمك من الساعة سبعة.
على أي جانب من ميدان الاتحاد هي ؟	على اي جهة من دوار الاتحاد بتكون؟	على أي جهة من ميدان الاتحاد هي؟
أريد بعضاً من كريم التنظيف .	بدي شوية كريم تنظيف.	بدي شوية كريم للتنظيف.
من فضلك لفها كل على حدة .	من فضلك غلفها كل وحدة لحالها .	لو سمحت لفها كل وحدة لحال.
كود المنطقة هو ثلاثة . ورقم الهاتف هو اثنان ثلاثة أربعة ثلاثة أربعة صفر صفر .	رقم المنطقة ثلاثة. ورقم التلفون اثنين ثلاثة أربعة ثلاثة اربعة صفر صفر.	كود المنطقة هو ثلاثة. ورقم التلفون هو اثنين ثلاثة أربعة ثلاثة أربعة صفر صفر.
كم عدد المرات التي سأغير فيها القطارات للوصول إلى هناك ؟	كم قطار رح اركب عشان أوصل هناك؟	قديش رح أغير القطارات عشان أوصل لهناك؟
هل تريد تسوية الفاتورة الآن ؟	راح تحاسب عالفاتورة هسا؟	بدك تسوى الفاتورة هسا؟
هل هذه السيارة الأجرة متاحة ؟	هاي التكسي فاضية؟	هاي التكسي متوفرة؟
هل يمكن أن تدلني على بعض الفنادق الرخيصة والنظيفة ؟	بصير ادلني عبعض الفنادق الرخيصة والنظيفة؟	بتقدر تدلني على فنادق رخيصة ونظيف؟
أنا مع بعض الأصدقاء .	أنا مع شوية صحاب.	أنا مع بعض الأصدقاء.
لشخصين عند الساعة السابعة , الاسم وتاناب .	لشخصين الساعة سبعة. الاسم وتاناب.	لشخصين عند الساعة سبعة, الاسم وتاناب.
ما هو الإجمالي ؟	شو الإجمالي؟	شو المجموع؟
أين يمكنني أن أشتري زلاجات وأحذية ؟	من وين بقدر اشتري زلاجات و أحذية؟	وين بقدر اشتري زلاجات و أحذية؟
ما وجه الاختلاف بين منتجك ومنتج منافسيك ؟	شو الفرق بين منتجك ومنتج الناس اللي بتنافسك؟	شو الفرق بين منتجك ومنتج منافسيك؟
أين تعلم السيد جونز اللغة اليابانية ؟	وين السيد جونز تعلّم اللغة اليابانية؟	وين تعلم السيد جونز اللغة اليابانية؟
لا يمكنني وضع الأمتعة تحت المقعد . هل لك أن تحتفظ بها لأجلي من فضلك ؟	أنا ما بقدر أحط شنطي تحت المقعد. ممكن تخبيلي ياهم لو سمحت؟	مش قادر أحط الشناتي تحت الكرسي. بتقدر تخليلي اياها لو سمحت؟
هل يمكنك أن تستدعي موظفاً يتحدث اليابانية ؟	ممكن تنادي موظف بحكي بالياباني؟	بتقدر تنادي موظف بحكي ياباني؟
سوف أبلغ الشرطة بذلك .	راح أبلغ الشرطة بهاظ الإشي.	راح أبلغ الشرطة بالموضوع.
عيد ميلادك اقترب .	عيد ميلادك قرب.	عيد ميلادك قرب.
تعثر صديقي والتوي كاحله .	صاحبي وقع والتوى كاحله.	وقع صاحبي و إلتوي كاحله.
نعم , أعتقد ذلك .	اه، بتوقع هيك.	اه, بتوقع هيك.
اتجاه واحد .	اتجاه واحد.	اتجاه واحد.
هلاّ جعلت توقيعك هنا والحروف الأولى من اسمك هنا .	هات خلي توقيعك هون وأول حروف اسمك هون.	ممكن تخلي توقيعك هون و الحروف الأولى من اسمك هون.
أين يمكن أن أوقف سيارتي ؟	وين ممكن أقف سيارتي؟	وين بقدر اوقف سيارتي؟
سأغلق الآن . شكراً على انتباهكم .	رح أسكر هسا. شكراً على انتباهكو.	رح أسكر هسا. شكراً على انتباهكو.
اللعنة . اللعنة . اللعنة . اللعنة . لقد كبرت معتاداً على وجهها .	يلعن. يلعن. يلعن. يلعن. أنا تعودت كثيرعلى وجهها.	اللعنة. اللعنة. اللعنة. اللعنة. أنا كبرت متعود على وجهها.
سنراك في الغد .	رح نشوفك بكرة.	رح نشوفك بكرا.
عندي ثلاثة أطفال .	عندي ثلاث ولاد.	عندي ثلاث ولاد.
نعم ، هي ، لأنك تستطيع أن ترى العلم أمام مكتب البريد .	صح، هي . لأنه بتقدر تشوف العلم قدام مكتب البريد.	اه ، هي ، لأنك بتقدر تشوف العلم قدام مكتب البريد.
هل تستطيع إنزال أمتعي إلى الردهة غداً صباحاً ؟	ممكن تنزل أغراضي على الردهة بكرة الصبح؟	بتقدر تنزل اغراضي على الغرفة بكرا الصبح؟
أربع ليالي .	أربع ليالي.	أربع ليالي.
دقيقة فقط ، من فضلك .	ديقة بس، لو سمحت.	دقيقة بس ، لو سمحت.
هل ستواجهني أية صعوبات في الجمارك ؟	راح ألاقي أي صعوبة بالتعامل مع الجمارك؟	رح تواجهني أي مشكلة بالجمارك؟
هلا أخبرتني كيفية تعديلها من فضلك ؟	ممكن تحكيلي كيف اعدلها لو سمحت؟	ممكن تحكيلي كيف أعديها لو سمحت؟
حسنا ، لا أعلم بعد لكنني سوف أحاول بالتأكيد .	ماشي، مش عارف لحد الآن بس رح أحاول أكيد.	ماشي، ما بعرف بس رح أحاول أكيد.
موعده المقرر هو الثامنة والنصف مساءْ بالتوقيت المحلي .	موعده هو الساعة ثمنية ونص المسا بالتوقيت المحلي.	موعده المقرر هو ثمنية ونص المسا بالتوقيت المحلي.
هل يمكن أن تضع حقيبة السفر هذه في صندوق السيارة .	ممكن لو سمحت تحطلي شنة السفر هاي بالطبون ؟	بتقدر تحط شنتة السفر هاي بصندوق السيارة؟
هذه ليست تفاحة ولكنها خوخة .	هاي مش تفاحة هاي خوخة.	هاي مش تفاحة بس خوخة.
إذا كان بالإمكان ، لم أكن لأخلع السنّة .	اذا ممكن، أنا بفضل ما تقلع السن.	لو كان ممكن، ما كنت ألبس السن.
علي أن أفحص ذلك مع زوجتي .	لازم أشوف الموضوع مع مرتي.	لازم افحص هاد مع زوجتي.
لا أعتقد أن هذه السكينة نظيفة . أيمكنك أن تُحضر لي واحدة أخرى ؟	أنا ما بظن إنه هاي السكينة نظيفة. بتقدر تجبلي وحدة تانية؟	ما بتوقع هاي السكينة نظيفة. بتقدر تجيبلي وحدة ثانية؟
املأ البنود الآتية في بطاقة التسجيل .	املي البنود اللي جاية على كرت التسجيل.	عبي البنود اللي جاية ببطاقة التسجيل.
ما الذي يمكن أن أراه في هذه الجولة ؟	شو بقدر أشوف بهاي الرحلة؟	شو ممكن أشوف بهاي الجولة؟
هل هذا المتبل حار ؟	هاظ المتبل حار؟	هاظ المتبل حامي؟
هذه كلها مطبوعات .	هاي كلها مطبوعات.	هاي كلها مطبوعات.
هذه هديه لصديق .	هاي هدية لرفيقي.	هاي هديه لصاحبي.
أراهن بخمسة دولارات .	براهن بخمس دولارات .	بدي أراهن بخمسة دولارات.
هل توجد أية جولة صباحية ؟	في أي جولات صباحية؟	في جولة صباحية؟
سنمكث .	راح نظل.	رح نضل.
هل توجد غرفة استراحة عامة بالقرب من هنا ؟	في غرفة استراحة عامة جنبنا هون؟	في غرفة استراحة عامة قريبة من هون؟
آسف ، لقد تحققت من إدارة الخدمة وإدارة المفقودات ولم أجدها عندهم .	بعتذر، تأكدت من إدارة الخدمة وإدارة المقودات وما لقيتها عندهم.	آسف ، تأكدت من إدارة الخدمة وإدارة المفقودات وما لقيتها عندهم.
هل قلت لي كيف أذهب إلى المتحف ؟	قلتلي كيف بروح على المتحف؟	بتقدر تحكيلي كيف أروح عالمتحف؟
لا أريد إنفاق أكثر من عشرين دولاراً .	ما بدي أصرف أكثر من عشرين دولار.	بدي اصرف أكثر من عشرين دولار.
هذا المكان مكتظ بالناسب ، أليس كذلك ؟	هاظ المكان معبى ناس، مش هيك؟	هاظ المكان مليان بالناسب، صح؟
سأحضر المدرسة الصيفية بجامعة هاواي .	رح أداوم بالمدرسة الصيفية بجامعة هاواي.	رح أجيب المدرسة الصيفية بجامعة هاواي.
من فضلك اعطني تصريحاً سارياً لمدة أسبوع .	لو سمحت أعطيني اذن لمدة أسبوع.	لو سمحت أعطيني تصريح ساري لمدة أسبوع.
ما هذا من فضلك ؟	شو هاظ لو سمحت؟	شو هاذ لو سمحت؟
سأحتاج إلى بطاقة ائتمان .	راح أحتاج الفيزا .	بدي بطاقة فيزا.
إذن دعنا نبطنها من الداخل .	معناته خلينا نحشيها من جوا.	طيب خلينا نبطها من جوا.
هل هذه محطة قطار سريع ؟	هاي محطة اكسبريس؟	هاي محطة قطار سريع؟
من ثمانية إلى اثنى عشر من فضلك .	من ثمانية ل اثنعش لو سمحت.	من ثمانية لثلثطعش لو سمحت.
أود قياس بذلة السباق الخاصة بي .	بدي اقيس بدلة السباق تبعتي.	بدي قياس شنته السباق تبعتي.
لقد طلبته منذ وقت طويل .	طلبته من زمان.	طلبته من زمان كثير.
أين الحمام ؟	وين الحمام؟	وين الحمام؟
اليابانيون لا يأخذون إجازات طويلة .	اليبانيين ما بيوخذو عطل طويلة.	اليابانيين ما بوخذ إجازات طويلة.
هاهي .	هيها .	هاي هي.
أنها مناسبة تماما .	زابطة تماما.	هي مناسبة كثير.
مرحبا . هذه هي الخطوط الجوية المتحدة .	مرحبا . هاي هي الخطوط الجوية المتحدة .	مرحبا. هاي هي الخطوط الجوية المتحدة.
أعيش في شقة إيجارها ثمانون ألف ين في الشهر .	بعيش بشقة، الإجارتها ثمانين ألف ين بالشهر.	ساكن بشقة إيجارها ثمانين ألف ين بالشهر.
هل هناك أماكن شاغرة بالنسبة لرحلة الخميس ؟	في أماكن فاظية برحلة يوم الخميس؟	في أماكن فاضية لرحلة الخميس؟
أعرف نادي قديم لموسيقى الجاز بوسط البلد .	بعرف نادي قديم لموسيقى الجاز بوسط البلد.	بعرف نادي قديم لموسيقى الجاز بوسط البلد.
هل انعطف يساراً ؟	بدي ألف يمين؟	روح عالشمال؟
أحبه فعلاً .	بحبه فعلا.	بحبه كثير.
من فضلك احفظ هذه الحقائب في محتجز الجمارك .	لو سمحت خلي هالشنتات بالجمارك.	لو سمحت حط هاي الشناتي بمحل الجمارك.
هل يمكنني استخدام إِشارة ضوئية ؟	ممكن استعمل إشارة ضوئية؟	بقدر استخدم إشارة ضوئية؟
أعمل في شركة نشر .	بشتغل بشركة نشر.	بشتغل بشركة نشر.
اتجه يساراً في هذا الشارع ثم انعطف عند أول منعطف يمين .	روح يمين بهالشارع وبعدين اتوجه يمين عند اول منعطف.	روح شمال بهاد الشارع بعدين لف عند أول منعطف يمين.
بالفعل لدي أخبار . أنا سأتزوج .	فعلياً، عندي أخبار. أنا بدي أجوز.	فعلا عندي أخبار. أنا رح أتزوج.
واحد هامبرجر وواحد شيز برجر ، من فضلك .	واحد همبرقر وواحد شيز برقر، لو سمحت.	واحد هامبرجر وواحد شيز برجر ، لو سمحت.
أوه ، آسف . كانت هناك مشاكل ونحن نقوم بحلها ، هل تتفضل بالانتظار لمدة ثلاثين دقيقة ؟	أووه، أنا آسف. كان في مشاكل منحلها. ممكن تستنى لثلاثين دقيقة؟	اه ، آسف. كانت في مشاكل واحنا بنحل اياها ، بتسمح تستنى نص ساعة ؟
كم عددها ؟	كم عددها ؟	قديش عددها؟
و هو كذلك . سأوصلك إلى هناك .	و هو هيك . رح اوصلك لهناك.	هو هيك. رح أوصلك لهناك.
أريد فندق أرخص قليلاً .	بدي فندق أرخص شوي.	بدي فندق أرخص شوي.
الأجدر بك أن تكف عن ذلك .	أحسنلك تبطل هالاشي.	لازم توقف عن هاظ.
هل أي من المتاجر الكبيرة به يعمل الآن ؟	في أي مول فاتحة هسه؟	أي محل كبير شغال هسا؟
كم تستغرق حتى تصبح متاحة .	قديش بدها حتى تصير فاظية .	قديش بدك وقت حتى تصير متوفرة.
معذرة . أريد أن أطلب طلب .	معلش . بدي أطلب طلب .	عفواً. بدي اطلب طلب.
عندنا حفلة مساء الجمعة . لماذا لا تنضم لنا ؟	عنا حفلة يوم الجمعة بالليل. ليش ما تيجي معنا؟	عنا حفلة مسا الجمعة. ليش ما تنضم لنا؟
كيف أستقلها ؟	كيف اركبهاا؟	شلون أصحبها؟
هل هي جولة يوم كامل ؟	هي الرحلة ليوم كامل؟	هي جولة ليوم كامل؟
في أي وقت يمكنني مغادرة الفندق ؟	بأي ساعة ممكن أعمل خروج من الفندق؟	بأي وقت بقدر أطلع من الفندق؟
أحضر لي بعض من الجبن المبشور .	هاتلي شوي من الجبنة المبروشة.	جيبلي شوية جبنة مبشرة.
هل لديك أحذية حريمي عند أصابع القدم ؟	عندك كنادر ستاتي مفتوحة من عند الأصابع؟	عندك أحذية حريمي عند أصابع القدم؟
هذه كبيرة جداً .	هاي كثير كبيرة.	هاي كبيرة كثير.
نبيذ غير حلو ، من فضلك .	واين بدون سكر، لو سمحت.	نبيذ مش حلو، لو سمحت.
تبلغ الميزانية أقل من ألف دولار .	الميزانية أقل من ألف دولار.	بتكلف أقل من ألف دولار.
إنها معطلة . هل تستطع فحص آلة التصوير هذه ؟	هاي معطلة. بتقدر تشيّك على آلة التصوير هاي؟	هي معطلة. بتقدر تفحص الكاميرا هاي؟
لقد كان هناك حادث مرور .	كان في حادث سير.	كان في حادث.
إجمالي سكان اليابان حوالي مائة وثلاثين مليوناً .	العدد الكلي لسكان اليابان حوالي مية وثلاثين مليون.	عدد سكان اليابان تقريبا مية وثلاثين مليون.
أي نوع من الملابس ؟	أي نوع من الأواعي ؟	شو نوع الأواعي؟
في أي مجال كان من قبل ؟	بأي مجال هو كان قبل؟	بأي مجال كان قبل هيك؟
كم تتكلف الليموزين للذهاب إلى وسط المدينة ؟	قديش تكلف الليموزين عشان نروح عوسط البلد؟	قديش بتكلف الليموزين عشان تروح على وسط البلد؟
الاسم هو جورو موتوياما . والرقم هو صفر ثلاثة ثلاثة اثنان ستة واحد اثنان أربعة تسعة خمسة .	الاسم هو جورو موتوياما . والرقم هو صفر ثلاثة ثلاثة اثنان ستة واحد اثنان أربعة تسعة خمسة .	الاسم هو جورو موتوياما. والرقم صفر ثلاثة ثلاثة اثنين ستة واحد اثنين أربعة تسعة خمسة.
لا ، ولكن شكراً لك . إنني أشعر بتحسن .	لا، بس شكرًا هونيك. أنا حاسس انو صرت أحسن.	لا، بس شكراً الك. أنا حاس بتحسن.
هل لك أن نبدل مقاعدنا من فضلك ؟	ممكن نبدل كراسينا لو سمحت؟	ممكن نغير كراسينا لو سمحت؟
هل هناك مكان يتم فيه عزف الموسيقي الريفية ؟	ما في أي مكان بعزف ألحان ريفية؟	في مكان بعزوف فيه الموسيقى الريفية؟
هلا أخبرتني قبل أن نصل إلى درهام ؟	بصير تخبرني قبل ما نوصل لـ درهام؟	ممكن تحكيلي قبل ما نوصل لدرهام؟
ظل سائراً عبر هذا الممر , وستجدها على الجانب الأيمن .	ظل ماشي بالممر هاذ , و رح تلاقيها عالجهة اليمين.	ظل ماشي بهاد الممر, بتلاقيها عالجهة اليمين.
أشعر بصداع .	بحس بصداع.	حاس بصداع.
عامل الصيانة سيصعد في الحال .	عامل الصيانة راح يطلع مباشرة.	عامل الصيانة رح يصعد هسا.
هل تمانع في جلوسي هنا ؟	بتمانع لو اقعد هون؟	عندك مانع أقعد هون؟
لقد قمت بزيارة البحيرات الكبرى لأول مرة .	هاي أول مرة بزور البحيرات الكبرى.	زرت البحيرات الكبرى أول مرة.
أصبت بالتهاب في الحلق .	التهب حلقي .	صار معي التهاب بالحلق.
نسافر جواً ثلاث مرات في الأسبوع ، أيام الثلاثاء والجمعة والسبت .	بنسافر بالطيارة ثلث مرات بالأسبوع، الثلاثاء، الجمعة والسبت.	نسافر ثلاث مرات بالأسبوع، أيام الثلاثاء والجمعة والسبت.
نعم . أيقظني من النوم بعد ثلاثة ساعات , من فضلك .	أيوة . صحيني من النوم بعد ثلاث ساعات, لو سمحت.	اه. صحيني من النوم بعد ثلاث ساعات, لو سمحت.
إلى أين يجب علي أن أنقل ؟	لوين لازم أحول؟	وين لازم انقل؟
لا أعرف كثيراً عن النبيذ ؟ ماذا يناسب هذا الطبق ؟	أنا ما بعرف كثير بالواين. شو بنفع مع هاذ الأكل؟	ما بعرف كثير عن النبيذ؟ شو مناسب هاظ الأكل؟
وللشرب ؟ .	بتشرب إشي ؟ .	للشرب؟
نعم ، هذا لا يشمل الوجبات .	أيوة، هاذ ما بشمل الأكل.	اه، هاد مش شامل الوجبات.
قمة جبل " فوجي " هي اعلي قمة جبلية في اليابان حيث يبلغ ارتفاعها ثلاثة آلاف وسبعمائة وستون مترا .	جبل فوجي هو أعلى قمة باليابان على ارتفاع ثلاثة ألاف وسبعمية وستين متر.	قمة جبل "فوجي" هي اعلي قمة جبل باليابان حيث ارتفاعها ثلاث آلاف وسبعمية وستين متر.
هل يمكن أن ترسل أحدا ؟	ممكن تبعت حدا؟	بتقدر تبعث حدا؟
هل من الممكن أن تفصل أكثر ؟	يتقدر توضح أكثر ؟	ممكن تفصل أكثر؟
أريد واحدة حديثة .	بدي وحدة جديدة.	بدي وحدة حديثة.
حسنا ، ولكن ليس منطقة المقاعد المكشوفة . فاليوم شديد الحرارة .	طيب ، بس مش على مكان الكراسي المكشوفة. اليوم كثير شوب.	تمام، بس مش منطقة الكراسي المكشوفة. اليوم حر.
سأرسلها لك ، لذا من فضلك انتظر هنا .	راح أبعثها الك، عشان هيك استنى هون لو سمحت.	رح ارسلهالك، عشان هيك لو سمحت استنى هون.
أخشى أن يكون هناك خطأ في الفاتورة .	خايف يكون في غلط بالفاتورة.	بخاف يكون في خطأ بالفاتورة.
هذا بارد إلى حد ما . هل يمكن أن تقوم بتسخينه ؟	هاظا بارد شوي. ممكن تسخنه؟	هاظ بارد شوي. بتقدر تسخينه؟
هلا راقبت حقيبتي من فضلك ؟	ممكن تراقبلي شنتي ، لو سمحت؟	ممكن تشوف شنتتي لو سمحت؟
لا امتلك أي نقود .	ما معي مصاري.	ما عندي مصاري.
أريد عامل تشغيل يتحدث اليابانية من فضلك .	بدي شغيل بيحكي ياباني لو سمحت.	بدي عامل تشغيل بحكي ياباني لو سمحت.
يبدو أنها نادرة جداً .	شكلها نادرة كثير.	شكلها نادرة كثير.
إنني على يقين أن المجرم قريب .	أنا متأكد إنه المجرم قريب.	أنا متأكد إنه المجرم قريب.
أجل ، أظن أني سوف أنظر .	ايوا، بظن إني رح اطلع.	أه ، بتوقع إني رح أشوف.
هل يوجد أحد يستطيع العزف على البيانو ؟	في أي حدا بعرف يعزف عالبيانو؟	في حدا بيعرف يعزف عالبيانو؟
لستُ معتمداً قانونياً .	أنا مش مؤهل.	مش معتمد قانونيا.
هل يمكنك أن توصل أمتعتي إلى الغرفة ؟	ممكن توصل اغراضي للغرفة؟	بتقدر توصل اغراضي للغرفة؟
هل الشوارع الخلفية خطر ؟	الشوارع الخلفية خطرة ؟	الشوارع الخلفية خطر؟
هل لك أن توقظني في تمام السادسة من فضلك ؟	بتقدر تصحيني الساعة ستة، لو سمحت؟	ممكن توقظني عالستة لو سمحت؟
أشعر بحالة سيئة وغثيان .	حاس بلعية ووظعي زفت.	حاس حالي تعبان و مغص.
لقد اتصلت منذ ثلاثة أيام بخصوص حقيبة ضائعة .	اتصلت من ثلاث أيام عشان شنتة ظايعة.	اتصلت قبل ثلاث ايام بخصوص شنتة ضايعة.
بضع دقائق أخرى من فضلك .	كم دقيقة كمان اذا سمحت.	شوية دقايق كمان لو سمحت.
لم أدرك الرحلة رقم عشرون المتجهة إلى سان فرانسيسكو .	ما لحقت الرحلة رقم عشرين اللي رايحة عسان فرانسيسكو.	ما كنت بعرف الرحلة رقم عشرين اللي رايحة على سان فرانسيسكو.
آه ، عندك ؟ بالتأكيد إن لديك تشكيلة كبيرة .	أها، عندك؟ طبعا إنت عندك تشكيلة كبيرة.	اه ، عندك ؟ أكيد عندك تشكيلة كبيرة.
بطريقة أبطأ ، من فضلك .	بشكل أبطأ ، لو سمحت.	بطريقة اسرع ، لو سمحت.
إنه لا يلائمني .	مش مناسبني.	مش مناسبني.
هل من الممكن إجراء اتصال على أن يتم تحصيل أجرته من الطرف الآخر ؟	ممكن أعمل مكالمة وتوخذوا حقها من الطرف الثاني؟	ممكن نعمل مكالمة على أن يأخذ أجرته الطرف الثاني؟
عندك أية شيء يمكن أن أتعاطه للطفح الجلدي ؟	عندك أي اشي ممكن آخذه عشان هاذ الطفح الجلدي؟	عندك أي اشي ممكن أعطه للوجع الجلدي؟
هل تفضلت و احتسيت القهوة معي ؟	تتفضل و تشرب قهوة معي؟	تفضل و شربت القهوة معي؟
سأقوم بتسجيل الدخول في تمام الساعة الثامنة مساءاً تقريباً .	راح أنزل بالفندق حوالي الساعة ثمنية المسا .	رح أسجل الدخول الساعة ثمنية المسا تقريبا.
إننا على ارتفاع اثني عشر ألف قدم .	احنا على ارتفاع اتناشر ألف قدم.	احنا على ارتفاع اثنعش ألف قدم.
لقد تمتعت بإقامتي . شكراً لك .	انبسطت بإقامتي . شكراً الك.	انبسطت بقعدتي. شكراً الك.
أُفضلُ حجرة هادئة .	بفظل غرفة هادية.	بحب غرفة هادئة.
كان يجب تدبير وسيلة مواصلات . ذاهبة إلى بوسطن .	لازم ندبر طريقة أو سيارة رايحة على بوسطن.	كان لازم تدبير مواصلات. رايحة على بوسطن.
لقد سرق مسجل الفيديو من غرفتي .	سرقو مسجل الفيديو من غرفتي.	انسرق مسجل الفيديو من غرفتي.
هذا هو طبقنا المميز , سمك موسى المشوي الخاص بدوفر .	هاذ طبقنا الخاص, سمك موسى المشوي الخاص بدوفر.	هاظ هو طبقنا المميز, سمك موسى المشوي الخاص بدوفر.
هل يمكن أن أختر جريدة يابانية , من فضلك ؟	ممكن اختار جريدة يابانية، لو سمحت؟	ممكن أختار جريدة يابانية, لو سمحت؟
هل لي أن أقاطعكم ؟	ممكن أقاطعكم؟	ممكن أقاطعكم؟
هل يوجد بالقرب من هنا مطعم صيني ؟	في مطعم صيني قريب من هون؟	في قريب من هون مطعم صيني؟
لا أريد أي شيء يكون كبير الحجم .	ما بدي أي اشي ظخم.	بدي إشي يكون كبير كثير.
هل أنت الأخير في هذا الصف ؟	إنت الأخير بهاذ الصف؟	انت اخر الصف بهاد الصف ؟
إن محفظتي نشلت في القطار .	وحدة سرق محفظتي في القطر.	محفظتي انسرقت بالقطار.
