# Supplementary material for: Exploring prompting for dialectical machine translation: a focus on north Jordanian Arabic
Source: PeerJ journal article supplement (doi:10.7717/peerj-cs.3209), 2025-11-12
Supplement: Code.zip [file AraT5_base_prediction.xlsx]

## Sheet: Sheet1
MSA	IrbidDial	T5
ما رأيك في مشاهدة فيلم آخر ؟	شو رأيك نشوف فيلم ثاني؟	شو رأيك اشوف فيلم ثاني؟
أريد كوبا من الماء لأتناول بعض الدواء , من فضلك .	بدي كاسة مي عشان اوخذ الدوا، لو سمحت.	بدي كاسة مي عشان اكل شوية الدواء, لو سمحت.
أبغي كرة .	بدي طابة.	بدي كرة.
كيف تحب أن يصفف شعرك اليوم ؟	كيف بدك يسرحلك شعرك اليوم؟	كيف بتحب تغسل شعرها اليوم؟
أريد رداءا ذات أكمام طويلة .	بدي جاكيت كم طويل.	بدي قميص لسع طويل.
ها-ها . صباح الخير حان دورك . إنه على ما يرام .	هههه. صباح الخير صار دورك. هو كويس.	هاظ هاظ. اليوم الخير الصبح الصبح الصبح الصبح الصبح الصبح. هو كويس.
أين نتقابل ؟	وين بدنا نتلاقى؟	وين بدنا نشوف؟
لقد أثلج صدري زيارة مقاركم الرئيسية وكذا ما جرى بيننا من مناقشات مهمة . شكراً جزيلاً على ما أبديتموه من تعاون .	فرحت كتير لما زرت مكاتبكم الرئيسية وكمان النقاشات الهمة اللي صارت بيناتنا. كتير شكراً على العون اللي قدمتوه.	اسفني اني ازور محلاتك الرئيسية. شكرا كثير من اشيك. شكرا كثير. شكرا كثير. شكرا كثير. شكرا كثير. شكرا كثير. شكرا كثير.
هل هذا قطار مباشر ؟	هاذ القطار مباشر؟	هاد القطار السريع؟
إبريق من القهوة ، لطفاً .	بكرج قهوة، لو سمحت.	ررر ، لو سمحت.
كم تكلفة الإفطار ؟	بقديش الفطور ؟	قديش تكلفة الفطور؟
من فضلك اختر لي مائدة ذات منظر ليلي لطيف .	من فظلك إختارلي طاولة مع منظر حلو بالليل.	لو سمحت حطلي طاولة لون بالليل حلو.
أين الحلاق ؟	وين الحلاق؟	وين الحلاق؟
الشاطئ أسفل يمينا . ياله من منظر رائع .	الشط تحت على اليمين. شو المنظر بجنن.	البحر تحتها يمين. هاظ منظر حلو.
كلاً ، إنهم متينين جداً .	لا، هظول كثير قويات.	لا، هي قويين كثير.
اتجه يسارا عند الناصية الثالثة .	روح يسار من عند الدخلة الثالثة .	روح يمين عند الشارع الثاني.
أين المحطة النهائية للحافلة ؟	وين اخر موقف للباص؟	وين محطة الثاني للباص؟
كم يتقاضى المرشد في اليوم ؟	قديش بيوخذ الدليل باليوم؟	قديش بتكلف الدليل اليوم؟
أريد كيساً من الفشار ، من فضلك .	بدي كيس بوشار، لو سمحت.	بدي كيس من الشار، لو سمحت.
من فضلك غير خمسين آلاف ين إلى دولارات أمريكية .	لو سمحت اصرف الخمسين ألف ين لدولر أمريكي.	لو سمحت هاظ مية دولار ين ل دولارات اميركية.
أريد قاموس جيب ، من فضلك .	بدي قاموس بنحط بالجيبة ، لو سمحت.	بدي كتاب الشناتي، لو سمحت.
من فضلك ، أريد فنجاناً من القهوة البيضاء .	لو سمحت ، بدي فنجان قهوة بالحليب.	لو سمحت، بدي قهوة بيضة.
هل يمكن أن أحصل على قمصاني نظيفة غداً صباحاً ؟	ممكن ألاقي قمصاني نظيفات بكرا الصبح؟	ممكن تعطيني قمصاني باردة بكرا الصبح؟
حسنا , حجرتك يا آنسة هي رقم تسعة صفر ثمانية . هذا مفتاحك .	طيب، غرفتك يا آنسة هي تسعة صفر ثمنية. هاذ مفتاحك.	ماشي, غرفةتك ياآنسة هو رقم تسعة صفر سبعة. هاد مفتاحك.
نعم ، بالطبع .	أيوا، أكيد.	اه ، أكيد.
ما تكلفة المقاعد الخاصة بالشرفة ؟	قديش بتكلف الكراسي تبعت البرندة؟	قديش تكلفة الكراسي للالطابقة؟
هل لي بدليل سياحي ؟	ممكن مرشد سياحي؟	ممكن دليل سياحي؟
أجل ، وأودّ محاسبة المطلوب هاتفياً على قيمة المكالمة .	صح، وأنا بدي احاسب يلي رنيت عليه على حق المكالمة.	اه ، بدي أحجز المطلوب التلفون على سعر مكالمة.
جلد التمساح الأمريكي .	جلد التمساح الأمريكي.	جلد الحيوان البريطاني.
سأكون هنا الساعة الثامنة إلى الربع .	رح أكون هون الساعة ثمانية إلا ربع.	رح أكون هون الساعة تسعة لربع.
أظن أن الملابس المصنوعة في اليابان قد جرى تفصيلها على نحو أفضل بالتأكيد .	بتوقع انو الأواعي اللي صنعت في اليابان تفصلت بطريقة أحسن أكيد.	بتوقع انه الثياب مصنوعة باليابان.
سأكون هناك حوالي السادسة مساءً .	راح أكون هناك حوالي الساعة ستة المسا.	رح أكون هناك تقريبا الساعة سبعة المسا.
لا أجيد الإنجليزية . هل ثمة من يتحدث اليابانية هنا ؟	أنا مش بعرف أحكي إنجليزي. في حدا بحكي ياباني هون؟	ما بعرفإنجليزي. في حدا بحكي ياباني هون؟
إنني أتصل من كشك عمومي في ماسي .	أنا بحكي معك من كشك عام بماسي.	أنا اتصل من محلات الرسمية بييي.
كم الوقت ؟	قديش الساعة؟	قديش وقت؟
إنني أبحث عن هذا .	أني بدور على هاظ.	أنا بدور على هاد.
لماذا لا تعطيها هدية ؟	ليش ما تعطيها هدية؟	ليش ما تعطيني هدية؟
استمتعنا بالعشاء .	كيفنا عالعشا.	بنحبنا لعشاء.
سأذهب بك على مقعدك . من هنا ، من فضلك .	راح اوديك على كرسيك. من هون، لو سمحت.	رح أروح معك على مقعدك ، لو سمحت.
سأعود إليك عندما تكون أقل انشغالاً .	راح أرجعلك بس تكون مش مشغول كثير.	رح ارجع معك لما بتكون أقل اشغل.
أنا السيد تكاهاشي بالغرفة رقم خمسة تسعة وأربعين . من فضلك أرسل أربع زجاجات من بيرة بودفايزر .	أنا الأستاذ تكاهاشي بالأوضة رقم ٥٩ . لو سمحت بدي أربع بطولين من البيرة بودفايزر.	أنا السيد الككككككككككككككككككككككككككككككككككككككككككككككككككككككككككككككككككككككككككككككككككككككككككككككككككككككككككككككك السيد السيد تكااااااااااا
حسنا ، إنه وقت الغداء . هل تحب أن نناقشه على الغداء ؟	ماشي، وقت الاكل صار. بتحب نحكي عنها واحنا ناكل؟	ماشي، وقت العشا. بتحب نحكيها على الغداء؟
هناك الكثير من الينابيع الحارة .	في كثير ينابيع حارة.	في كثير اااا الااااا لاااا لاااا لااااا.
سر مباشرة ، من فضلك .	روح ع طول، لو سمحت.	روح بسرعة ، لو سمحت.
هل تمانع إذا التقطت صورة لك ولسيارتك الأجرة ؟	بتمانع لو أخذت صورة إلك وللتكسي تبعتك؟	بتمانع اذا صورتك مع سيارتي؟
كم من الوقت نحتاج للذهاب مشياً من هنا إلى مبنى البلدية ؟	قديش بدنا وقت عشان نمشي من هون لبناية البلدية؟	قديش بدنا نروح ع الشارع من هون على مكتب البلدية؟
هل تستطيع أن تخفض سعرها لوجود بعض البقع بها ؟	بتقدر ترخصها لأنه في عليها شوية بقع؟	بتقدر تزيل السعر فيه فيه شوي الحمر؟
شكراً ، هذا يكفي .	شكراً ، هاظ بكفي.	شكرا ، هاد شوي.
أريد الشخص الذي يعد وثائق عادية في حجم ورقة الخطاب بدون الحاجة إلى طيهم .	بدي الشخص اللي بعمل الوثائق اللي بحجم الورق العادي بدون ما يظطر يثنيهم.	بدي حدا بقدر وثائق عادية بحجم ورقة الرسالة بس لازم أمسحها.
هل نحتاج إلى طرح هذا للتصويت ؟ إن لم نكن في حاجة إلى هذا ، فإمكاني أن أعتقد حينئذ أننا قد وصلنا إلى نتيجة , سأقوم بإرسالها إلى مجلس إدارتنا صباح غد .	هل احنا محتاجين نحط هاظ للتصويت؟ اذا لأ، بتوقع أنه وصلنا للنتيجة، بدي أبعثها لمجلس ادارتنا بكرا الصبح.	بدنا هاظ ل هاظ ، ما ما بدنا هاظ ، ما ما ما بدنا هاظ, بقدر أتوقع لو سمحت, رح ابعتها على مكتبتي بكرة بكرة.
أين مترو الأنفاق ؟	وين المترو؟	وين المترو ؟
كنت أفكر في الحصول على هذه الدورة في فترة نصف العام المقبلة .	كنت بفكر أوخذ هالكورس بفترة نص السنة الجاية.	كنت كنت أفكر بدي اخذ هاي الدورة بعد فترة نص السنة الجاي.
الخامس عشر من سبتمبر يوم احترام المسنين .	خمسطعش تسعة هو يوم احترام المسنين.	خمسعش من شهر شهر عشر يوم زاكي.
ارفعوا أيديكم .	ارفعوا إيديكو	يلا لخذك.
أين موقف الحافلات ل بي ؟	وين مجمع الباصات ل بي ؟	وين موقف الباصات لي؟
قم بدفعها من فضلك , إن كان ذلك ممكنا .	لو سمحت دزها , إذا بصير	خليني أدفعها لو سمحت, لو سمحت.
لقد نسيت أن آخذ حقيبتي اليدوية .	نسيت آخذ شنتة الإيد.	نسيت اخذ شنتاتي اليدوية.
فكرة صائبة . متى تخطط للمجيء ؟	فكرة صحيحة. متى بتنوي تيجي؟	فكرة صحة. متى بتتوقع تروح؟
اثنان ويسكي مع الماء , من فضلك .	تنين ويسكي مع مية, لو سمحت.	اثنين بسكي مع النهر, لو سمحت.
على فكرة , هل أنت غير مشغول السبت القادم ؟	بالمناسبة، راح تكون فاضي السبت الجاي؟	على فكرة, انت مش مشغول اليوم الجاي؟
هل لديك هذا باللون الأخضر الداكن ؟	عندك هاذ باللون الاخضر الغامق؟	عندك هاد باللون الأزرق الأزرق ؟
هالو ، هل هذه تعود إلى روي ؟	مرحبا، هاي لروي؟	هاظو، هاي رح ترجع على سيو؟
أريد حامل ثلاثي .	بدي حامل ثلاثي.	بدي علبة ثلاث.
عظيم . كنت أبحث عن سيارة أجرة لكن هذا أفضل .	كتير حلو. كنت قاعد بدور على تاكسي بس هاي احسن.	كثير. كنت بدور على سيارة تاكسي بس هاد أحسن.
ثلاثة اثنان واحد اثنان . انتظر ثانية ، حسنا ؟ أريد أن أرسل لك شيئاً هنا . معذرة .	ثلاثه اثنين واحد اثنين. استناني شوي , طيب؟ بدي أبعثلك اشي هون. اعذرني.	ثلاث اثنين واحد اثنين. شوف مرة ثانية ، طيب ؟ بدي ابعثلك اشي هون.
حسنا ، إنه باهظ الثمن . إنه لم يصنع في اليابان ، أليس كذلك ؟	تمام ، هو غالي .اكيد مش صنع اليابان، مش؟	ماشي، هاد غالية. ما مصنوع باليابان ، صح؟
ويسكي اسكتلندي وماء من فضلك .	ويسكي اسكتلاندي ومية لو سمحت.	سكي لبريطاني و مي لو سمحت.
هل توجد أية كازينوهات جيدة ؟	في أي كازينوهات حلوة؟	في الملاهي كويسة؟
إنها عاملتني كما لو كنت متسولاُ .	عاملتني كإني شحاد.	هي عملتني ما كنت موظفة.
شخص ما فتح الطرد الخاص بي .	في حد فتح الطرد تبعي.	حدا فتحت الطرد تاعي.
هل تريد أن افحص موتور السيارة ؟	بدك ياني أفحص ماتور السيارة؟	بدك أفحص سيارة السيارة؟
أنا في نزهة طويلة سيرا على الأقدام .	أني طالعة برحلة طويلة تمشاية عجري.	أنا بجولة طويل مشي.
هذه الأيام ، استخدم الكمبيوتر بشكل دائم في العمل .	هاي الأيام ، أنا بستخدم الكمبيوتر دايماً بالشغل.	هاي الأيام ، استخدم كمبيوتر كثير للعمل.
موظفو المبيعات في هذا المتجر لطفاء جداً .	موظفين المبيعات بهاذ المحل لطيفين كثير.	الموظفين المبيعات بهاي المحل كثير كثير.
الثاني من على اليسار .	الثاني عالشمال .	الثاني من اليمين.
هل أنزل هنا لمركز روكفيلر ؟	أنزل من هون عمركز روكفيلر؟	انزل هون بمركز رورتي؟
هذه السيدة كاوازو في غرفة رقم ستة عشر أحدى عشر .	هاي الست كاوازو بالغرفة سطعش إحدعش.	هاي السيدة كيمو بغرفة رقم ستة وعشرين واحدعش.
هل تستطيع خفضها حتى عشرين دولار ، من فضلك ؟	بتقدر تنزلها لعشرين دولار، لو سمحت؟	بتقدر تزيدها لحد عشرين دولار، لو سمحت؟
أشعر بتحسن .	حاس بتحسن.	حاس حاس تعبان.
هل يمكنكم صرف الشيك ذو المائتي دولار الخاص بي ؟	بتقدروا تصرفولي الشيك أبو الميتين دولر تاعي؟	ممكن تعطيني الشيك اللي اللي بتكلف الشيك اللي اللي عندي؟
ولكن لا ضرورة لدفع بقشيش .	بس ما في داعي للبخشيش.	بس ما لازم أدفع مية هدية.
لقد جاء لتوه .	جا هسا.	يجي بعدين.
لنتصل به .	خلينا نرلنه.	خلينا احكي فيه.
بالمناسبة ، اسمي هيروش إيجيما .	بالمناسبة، اسمي هيروشي ايجيما.	بصح ، اسمي هيتريك جيياا.
التاسع والعشرون من أغسطس .	تسعه وعشرين من آب.	تسعة وعشرين من شهر شهر شهر شهر شهر شهر شهر شهر شهر.
هل لا زال لديكم مقاعد لعرض الليلة ؟	ظل في عندكم محلات لعرض الليلة؟	في عندكم مقاعد بالعرض الليلة؟
أريد القيام بحجز للساعة الثالثة والنصف ظهراُ .	بدي أعمل حجز للساعة ثلاثة ونص الظهر.	بدي احجز الساعة ثلاث ونص الصبح.
سوف نحضرها الآن . ما هو رقم غرفتك ؟	رح نجيبها هلا . شو رقم غرفتك ؟	رح أجيبها هسا. شو رقم غرفتك؟
رقم غرفتي هو ثلاثة ستة وعشرين . هل يمكن أن تأخذ الغسيل ؟	رقم غرفتي هو ثلاثة ستة وعشرين. بصير توخذ الغسيل؟	رقم غرفتي هو ثلاث ستة وعشرين. بتقدر تاخذ الحمام؟
أليس لديك دروس تجريبية ؟	ما عندك كورسات تجريبية؟	ما عندك دروس شتوي؟
رحلة الطيران دلتا رقم ثمانية وعشرون والمتجهة إلي نيو أورلينز سوف تتأخر حوالي ساعة .	رحلة الطيارة دلتا رقم ثمانية وعشرين اللي رايحة على نيو أورلينز حتى تتأخر حوالي ساعة.	رحلة الطيران لدولز رقم تسعة وعشرين و رايحة على نيو نيوووووووووووووووووووووووووووووووووووووووووووووووووووووووووووووووووووووووووووووووووووووووووووووووووووو الرحلة ل ل ل ث وعشرين و ل
هل لديكم غرفة متاحة الليلة ؟	عندكم غرفة فاضية الليلة ؟	عندكم غرفة موجودة الليلة؟
بصراحة ، لا أتفق مع ذلك .	بصراحة، ما بتفق مع هاظ.	بس ، مش بظن مع هيك.
هل لك أن تتفضل وتملأ هذه ؟	بتقدر تتكرم و تعبي هاي؟	بتقدر تضل هاي؟
يبدو أن النقود التي أعطيتني إياها ناقصة عشر دولارات .	شكله المصاري اللي إنطيتني اياها ناقصة عشر دولارات.	شكله اللي تعطينيها ناقص عشر دولارات.
بالخارج .	برا.	برا.
أريد ما يخصني لكي أرحل .	بدي اللي بخصني مشان أروح.	بدي شو تبعي عشان نروح.
هل يمكن أن ترسلها إلى عنواني في اليابان عن طريق بريد الطرود الدولي وتحصل الثمن من هناك ؟	ممكن توديها على عنواني باليابان عن طريق صفحة الطرود الدولي و توخذ حقه من هناك ؟	بتقدر تبعثها على العنوان لليابان على طريق البريد الجوي بوخذ سعرها من هون؟
أين قسم السيدات ؟	وين قسم النسوان؟	وين قسم السيدات؟
إنه ألم حاد .	هو وجع قوي.	هو وجع متأخر.
إنني في نفس السن .	أني بنفس العمر.	أنا نفس السن.
فكرة جميلة .	فكرة حلوة.	فكرة حلوة.
هل الأجانب يمكنهم الحصول على الكتب في المكتبة ؟	بقدروا الأجانب يستخدموا الكتب بالمكتبة؟	الجنسيات بتقدر تاخذ الكتب بالسفارة؟
تحية . أنا جون .	مرحبا. أني جون.	شكرا. أنا جون.
هل يمكن أن نبدأ اللعب عندما ينتهون ؟	بنقدر نبلش نلعب لما يخلصوا؟	ممكن نشتغل اللعب لما رح يطلع؟
مائة وخمسة وثلاثون ين للدولار الواحد .	مية وخمسة وثلثين ين للدولار الواحد.	مائة وثلاثين مية وثلاثين ين دولار واحد.
نعم . انتظر , سوف احضر لك واحدة .	طيب. استنى، راح أجيبلك وحدة.	اه ، رح أجيبلك وحدة.
هلا أنزلتني عند فندق هلتون من فضلك ؟	ممكن تنزلني عند فندق الهيلتون لو سمحت؟	ممكن انزلني عند فندق لو سمحت؟
أين الاستعلامات الرياضية ؟	وين الاستعلامات الرياضة؟	وين الاستعلامة الرياضة؟
هذه هي فلوس أقلام الحبر . فاتورة بمائة دولار .	هايذ حق قلام الحبر. فاتورة بمية دولار.	هاي هي مصاري قلم الحبر. فاتورة بمية دولار.
لا ، شكراً . من الأفضل أن لا أشرب المزيد .	لا، شكراً. احسنلي ما أشرب اكثر من هيك.	لا، شكرا. لازم أشرب شوي.
بما في ذلك الإفطار ، والضريبة ، ورسم الخدمة ، سيكون الحساب خمسة أربعون دولارا للشخص الواحد في الليلة .	بتشمل الفطور، الضرايب، ورسم الخدمة، الحساب رح يكون خمسة وأربعين دولار للواحد في الليلة.	شو هاظ الفطور، بتكلفة ، رسوم الخدمة ، رسوم الخدمة ، رسوم الخدمة ، بقدر الحساب خمسة ثلاثين دولار للي اليوم.
ما عرض الأوبرا اليوم ؟	شو عرض الأوبيرا اليوم؟	شو العرض السينما اليوم؟
أريد مقعداً يطل على الممر ، من فضلك .	بدي كرسي يطل عالممر، لو سمحت.	بدي كرسي بيفتح على الطريق ، لو سمحت.
أجل أريد شيئاً أقرؤه .	أيوا بدي إشي أقراه.	أه بدي اشي شايفها.
غير محتمل بدرجة كبيرة .	بنطاقش بدرجة كبيرة.	مش ممكن معقولة كثير.
هل تعرف المطعم يا كيويا ؟	بتعرف المطعم يا كيويا؟	بتعرف المطعم يا كيمو؟
يستطيع الصرافون أن يغيروا دولاراتك من أجل بقشيش الكازينو . هل نذهب ؟	السمسارين بقدروا يصرفولك الدولرات عشان بخشيش الكازينو. بصير نروح؟	بتقدر تغير دولاراتك عشان لغطسك. رايح؟
يسعدنا أن نقدم لك الشراب الذي تريده متبوعاً بالغداء . دليل كامل بالمشروبات التي نقدمها على رحلتنا موجودة في دليل المعلومات الخاص بمجلتنا .	بسعدنا إنه نقدملك العصير اللي بتختاره وبيلحقه الغدا . منوفر قائمة كاملة من الشراب في هاي الرحلة موجودة بقسم المعلومات تاع مجلتنا.	بدنا أطلبك العصير اللي بدك هاظ ل الأكل. دليل كامل بمشروبات اللي بتعملها على الرحلة اللي اللي بتتابع على الرحلة. دليل كامل بطعم مشروبات اللي بتتابع على الرحلة. دليل كامل بطعم مشروبات اللي بتتابع على الرحلة.
هل أستطيع تأجير أداة للتنفس أثناء السباحة ؟	بقدر أستأجر شغلة للتنفس خلال السباحة؟	بقدر أستأجر أدوات للغطس بعد السباحة؟
آه . هل يمكنني الحصول على وجبتي فيما بعد ؟ أنا أشعر أنني لست على ما يرام الآن .	ممم. ممكن أخد وجبتي بعدين؟ حاسس حالي مش على بعضي هسا.	اه. بقدر اخد الأكل بعدين؟ أنا مش كويس هسا؟
ما هو رقم الرحلة الجوية ؟	شو رقم رحلة الطيران؟	شو رقم الرحلة الجوية؟
أبغي تأجير سيارة من هذا الطراز لمدة يومين .	بدي استأجر سيارة من هاذ الموديل لمدة يومين.	بدي استأجر سيارة من هاذ الموديل لمدة يوم.
أنا غير متأكد إذا كنت قد حزمت ملابس كافية لرحلة مدتها ثلاثة أيام .	أنا مش متأكد اذا جهزت وعية بتكفيني لرحلة مدتها ثلاث أيام.	أنا مش متأكد اذا كنت اشتري ملابس صغيرة رحلة لمدة ثلاث أيام.
يوجد بجانب هذا المبني تحديداً .	هو جنب هاذ المبنى بالتحديد .	في جنب هاد المحل بالزبط.
هه . هذه . يبدو اللون جميلاً عليك .	هه. هاي. شكل اللون حلو عليك كثير.	هاظ. هاي. شكله لون حلو منك.
هل أستطيع تناول غذائي الآن ؟	ممكن أوكل هسا؟	بقدر أكل أكل هسا؟
هل يتوقف القطار في برايتون ؟	بوقف القطار عند برايتون؟	القطار بكسفورد؟
من المهم جدا أننا نستطيع الوصول إلى المواد الخام التي نحتاجها في المشروع .	اشي كثير مهم إنه قدرنا نوصل لمجموعة المواد الأساسية اللي راح نحتاجها للمشروع.	كثير كثير لازم نوصل من الاشياء المخصصة اللي بدناها بالطبخ.
أود أن أطلب بدلة داكنة من أجلي .	بدي أطلب بدلة لونها غامق عشاني.	بدي أطلب بدلة لحمرة مني.
هذا جيد . متى هو ؟	هيك تمام. متى رح يكون؟	هاظ كويس. متى هو؟
أرغب في شراء شامبو .	أنا بدي أشتري شامبو.	بدي اشتري شامبو.
خمسون جنيهاً .	خمسين قنيه.	خمسين دولار.
لا يوجد رسم ضروري .	مش موجود رسم ظروري.	ما في رسوم لازم.
هل كان لديك أية خدمات أخرى إلى جانب طعام الإفطار هذا الصباح ؟	في عندك أي خدمات ثانية غير فطور الصبح؟	عندك الخدمات ثانية عند الأكل الصبح الصبح؟
متى يفتح المصرف ؟	أميت بفتح البنك؟	متى أفتح البنك؟
إجمالي المبلغ المطلوب مائتان وثلاثة وأربعون جنيه ، يا سيدتي .	المبلغ الكلي بطلع ميتين وثلاثة وأربيعين جنيه، يا مدام.	كممية و عشرين دولار ، يا سيدي.
لماذا لم يأت إلى الحفلة أمس ؟	ليش ما اجى على الحفلة امبارح؟	ليش ما ما يجي على حفلة امبارح؟
أريد لفتان من ISO مائة ، فيلم ملون ، ستة وثلاثين لقطة ، من فضلك .	بدي لفتين أيزو مية، فلم ملون، ستة وثلاثين لقطة ، لو سمحت.	بدي شوية للسين من ل ل ل ل ل ل ل ل ل ل ل ل ل ل ل ل ل ل ل ل ل ل ل ل ل ل ل ل ل ل ل ل ل ل ل ل ل ل ل ل ل ل ل ل ل ل ل ل ل ل ل ل لة لين من لين لننن
هل لديك مرآة ؟	عندك مراية؟	عندك شاشة؟
هل من المقبول عدم اتباع أي شخص لتعليمات الأمن ؟	بصير حدا ما يتبع تعليمات الأمن؟	ما مقبول ما تبع اي حدا للوازم الشرطة؟
علىّ أن ألحق بطائرة العاشرة صباحاً .	لازم ألحق طيارة الساعة عشرة الصبح.	لازم أروح ع الطيارة الساعة تسعة الصبح.
من اين يمكنني الحصول على مسكوكة لركوب المترو ؟	من وين ممكن أجيب تذكرة لأركب المترو؟	من وين بقدر اخذ مية مية لركب المترو؟
أين يمكنني تغير نقودي ؟	وين بقدر أصرف مصاريي؟	وين بقدر أغير مصاريي؟
هل بها جهاز تدفئة ؟	بيها جهاز تدفئة؟	في جهاز سجائر؟
أريد بعض الكريم الليلي .	بدي كريم ليلي.	بدي شوية كريم بالليل.
كم تتقاضى ثمنا لإرسالها لليابان ؟	قديش بدك توخذ عشان تبعثها على اليابان؟	قديش بتخذ سعر نرسلها لليابان؟
أكيدا التي تتحدث معك ، أنا عندي حجز مائدة في تمام الساعة السادسة والثلث هذا المساء . ولكني آسفة لأني سأصل متأخرة نصف ساعة .	أكيدا يلي بتحكي. عندي حجز طاولة عالساعة ستة و ثلث المسا. بس آسفة لإني رح أوصل متأخرة نص ساعة.	أكيد ، أنا عندي حجز طاولة الساعة ستة و عشر بالليل. بس آسف اني رح اوصل متأخر ساعة.
متي سنستقل القارب ؟	متى بدنا نركب القارب؟	متى رح أركب الباص؟
أرغب في غرفة بحمام .	بدي غرفة بحمام.	بدي غرفة بحمام.
معذرة , متي ينتهي هذا الفيلم ؟	عفواً, متى بخلص هذ الفلم؟	معلش، متى رح أخلص هال الفلم؟
لقد تمكنت من تحقيق ذلك .	قدرت أوصل لهذا الشي.	بتقدر تعمل هيك.
هل هو طريق طويل ؟	هو الطريق طويل؟	هو الطريق طويل؟
ما هي الأنواع التي لديكم ؟	شو الأنواع اللي عندكم؟	شو نوع نوع عندك؟
سأرتبك . هل تمانع في رسم خريطة لي ؟	رح أرتبك. ما عندك مشكلة ترسملي خريطة؟	رح أحجزك. بتمانع أرسم خريطة؟
لدينا جمبري رائع جداً اليوم .	عنا جمبري مميز كثير اليوم.	عنا لحمي كثير كثير اليوم.
هل لديك أيّ خرائط بسيطة للمدينة ؟	عندي أي خرايط بسيطة للمدينة؟	عندك خريطة صغيرة بالمدينة؟
معذرة أريد الذهاب إلى فندقي في المدينة بالحافلة . أين يمكن أن أستقل حافلة ؟	عفواً، أنا بدي أروح على الفندق موجود بالمدينة بالباص. من وين بقدر آخذ باص؟	معلش بدي أروح على فندقي بالباص. وين بقدر أستأجر باص؟
شكراً . لكنني لا أعتقد أن عندي وقت للإقامة لمدة ليلتين . هل يمكنك حجز غرفة بسريرين لي في ذلك الفندق ليلة الثاني عشر من مارس فقط ؟	شكراً ، بس ما بتوقع أنه معي وقت عشان أظل ليلتين. ممكن تحجزلي غرفة مزدوجة في الفندق لليلة اثنعش ثلاث بس؟	شكرا. بس ما عندي وقت بقعد لمدة لياليين. بتقدر احجز غرفة بغرفين بغرفين بغرفين بغرفين بغرفين بغرفين بغرفين بغرفين بغرفين بغرفين بغرفين من يوم عشر من شهر ستة بس؟
بالتأكيد . كيف يمكننا خدمتك ؟	أكيد. كيف منقدر نخدمك؟	أكيد. كيف بقدر أعملك؟
شيكات سياحية . شكراً . خذ تذكرتك وبطاقة المرور للصعود على متن الطائرة . كن هناك قبل وقت الرحلة بساعة من فضلك .	شيكات سياحية. شكراً. أخذ تذكرتك و الفيزا عشان تطلع على الطيارة. كون هناك قبل الرحلة بساعة لو سمحت.	شيكات سياحية. شكرا. خذ تذكرة و تذكرة الطيران بعد وقت الرحلة الساعة لو سمحت.
أوافق . يجب أن تصبح طبيعية جداً .	أنا موافق. لازم تصير طبيعة كثير.	بتوقع. لازم تكون طبيعي كثير.
أهذه عيادة إف ؟	هاي عيادة إف؟	هاي عيادة بيي؟
هل لك أن تغيرهم إلى دولارات من فضلك ؟	ممكن تحولي اياهم لدولارات، لو سمحت؟	ممكن تغيرها على دولارات لو سمحت؟
حسناً . أراك الساعة الثانية يوم الأحد .	تمام . بشوفك الساعة ثنتين يوم الأحد.	ماشي. شوفني الساعة ثلاثة يوم السبت.
هل يمكنك أن تشذب شاربي ؟	ممكن لو سمحت ترتبلي شواربي؟	بتقدر كعير شعرها؟
أود أن أصرف هذا الشيك بسبعين دولاراً .	بدي أصرف هاذ الشيك بقيمة سبعين دولر.	بدي اصرف هاد الشيك خمسمية دولار.
الجزء المكتوب بالطريقة المائلة يشير إلى التغييرات التي حدثت في التسعينات .	الجزء اللي مكتوب بالطريقة المايلة بدل على التغييرات اللي صارت بالتسعينات.	كل كلك مكتوب على طريقة أبيضة.
هل تشمل هذه الرحلة زيارة لبرج سيرز ؟	بتشمل هاي الرحلة زيارة لبرج سيرز؟	هاي الرحلة رحلة بللللللللللللس سيز؟
أين ستنتهي الجولة ، ومتى ؟	وين راح تخلص الرحلة، و أميت؟	وين رح اخلص الجولة ، متى؟
تفضل هذان دولاران . احتفظ بالباقي .	تفظل هي دولرين. خلي الباقي إلك.	تفضل هاي دولارين. خلي والباقي.
هل يوجد أي محل متعدد الأقسام قريب من هنا ؟	في أي مول قريب من هون؟	في محل كثير أنواع من هون؟
هل ستزال تعمل جدول المواعيد ؟	هل رح تظل جدول المواعيد شغّالة؟	رح تعمل جدول المواعيد؟
سوف آخذ هذه ، من فضلك .	راح آخذ هاظ ، لو سمحت.	رح اخذ هاي ، لو سمحت.
يقولون أن اليابان دولة غنية جداً .	بقولوا أنه اليابان بلد غني.	بتوقع اليابان دول جيدة كثير.
ملعقتين , من فضلك .	معلقتين , لو سمحت.	ميةتين, لو سمحت.
أجل ، واحدة فقط . متى سأعرف ؟ وكيف سيتم تعويضي ؟	أها، بس وحدة؟ متى رح أعرف؟ وكيف رح يكون التعويض؟	اه ، وحدة بس. متى رح نشوف؟ كيف رح أجيبي؟
هناك ، أمام بيانات السائح تماما .	هناك ، قدام بيانات السايح بالزبط .	هناك ، أمام وثائق السياحي بالظبط.
أين أجد الاسطوانات المدمجة ؟	وين بلاقي السيديات؟	وين بلاقي الطوابع لبطانيات؟
أنا متأثر للغاية , لا أستطيع البقاء ساكنا .	أنا متأثر كتير, ما قادر أضل ساكت.	أنا مبسوط كثير, ما بقدر اظل مبسوط.
هل هو قريب لنصل إليه سيراً .	هو قريب عشان نوصلو مشي؟	هو قريب لحتى نوصلها رايح.
إني من إسبانيا .	أنا من إسبانيا.	أنا من اليابان.
ـ أين أقرب محل جزارة ؟	وين أقرب لحام؟	وين أقرب محل سوبرة؟
أود تأجير هذا الطراز من السيارات لمدة أربعة وعشرين ساعة .	بدي أستأجر هاذ الموديل من السيارات لمدة أربع وعشرين ساعة.	بدي أستأجر هاد الموديل من السيارات لمدة أربعة وعشرين ساعة.
لا يمكن أن أبيع هذه دون روشتة .	ما بقدر أبيع هاي بدون وصفة طبية.	ما بقدر اشتري هاي بدون دكتورة.
هل لديك صحف يابانية ؟	عندك جرايد يابانية؟	عندك مجلة يابانية؟
هل هذا الحذاء متين ؟	هاذ البوط قوي؟	هاد الحذاء متين؟
لكنّي لدى موعد لرؤيتها في السّاعة الثّانية .	بس أنا عندي موعد عشان أشوفها الساعة ثنتين.	بس عندي موعد اشوفها بالساعة ثلاثة.
هل لديك غرف أكبر ؟	عندك غرف أكبر؟	عندك غرفة أكبر؟
اعطني عامل التليفون من فضلك .	إعطيني عامل التلفون لو سمحت .	اعطيني عامل التلفون لو سمحت.
ظننت أنكم أيها الشباب تأكلون الكعك المخبوز فقط .	فكرت إنكو يا شباب بتوكلوا الكعك المخبوز بس.	حسيت اني اني أنا شابا بتاكل الكعك جافة بس.
أريد استئجار كرسي مركب .	بدي أستأجر كرسي اتمدد عليه.	بدي استأجر كرسي سفينة.
أنا أبحث عن شيء أنيق .	أني بدور على اشي لايق.	أنا بدور على اشي حلو.
حسناً . هل يجب أن أقوم بتركيزها ؟	ماشي. لازم أساويها مركزة؟	ماشي. لازم اركزها؟
قهوة مع القشدة والسكر ، من فضلك .	قهوة مع القشطة والسكر، لو سمحت.	قهوة مع عصير سكر ، لو سمحت.
سوف ننتظر . من فضلك اتصل بنا عندما تكون مستعداً .	رح نستنى . لو سمحت, إتصل فينا لما تكون جاهز.	رح نشوف. لو سمحت اتصل عنا لما بتكون جاهز.
فقط سياحة .	بس للسياحة.	بس رحلات.
أحتاج إلى طيب .	بدي دكتور.	بدي زاكي.
إن الجونلات القصيرة ومعها الأحذية الطويلة لن تنقضي موضتها .	مش ممكن تخلص موضة التنانير القصيرة مع الجزم الطويلة.	الجاتات القصيرة مع أحذية طويل رح تطلع.
ألا ترغب في فنجان شاي ؟	ما بدك تشرب كاسة شاي؟	ليش بدك قهوة؟
ليس تماماً . فقط شيء ما غير غالي الثمن .	مش هيك. بس إشي مش غالي.	مش كثير. بس اشي مش غالية.
إذا كنت تودّ ، بإمكاننا الاستراحة هنا .	إذا إنت حاب، ممكن نستريح هون.	لو كنت بدك ، بتقدر أقعد هون.
هل هذه كلها هي حقائبك ؟	هاي كلها شناتيك؟	هاي كلها هي الشناتي؟
هل تريد بالحلويات ؟	بدك حلويات؟	بدك اكلة؟
نعم ، لكن ليس قويا جدا .	اه ، بس مش قوي كثير.	اه، بس مش قوي كثير.
ويسكي وماء ، من فضلك . هل لديكم وجبة خفيفة معه ؟	ويسكي ومي، لو سمحت. عندكم سندويشة صغيرة او شيء خفيف معه؟	سكي ، لو سمحت. عندكم وجبة خفيفة معك؟
أتعرف كاثي ؟ إنه عيد ميلادها .	بتعرف كاثي؟ هاي حفلة عيد ميلادها.	بتعرف اسي؟ هو عيد فقرتي.
أود تحميض هذا الفيلم . متي سيكون جاهزا ؟	بدي أحمض هالفلم. متى رح يكون جاهز؟	بدي أظف هاد الفلم. متى رح تكون جاهزة؟
تشغل أشخاصاً جدد في أبريل .	رح توظف ناس جداد في نيسان.	بتشتغل أشخاص جديدة شهر شهر شهر شهر شهر خمسة.
سأكون سعيدا بذلك . متى ترغب في ذلك ؟	رح اكون مبسوط لهالشي. متى بدك ياه؟	رح أكون مبسوط هيك. متى بدك هيك؟
رائع .	بجنن.	حلو.
من فضلك اتجه يساراً عند التقاطع التالي .	لو سمحت روح عاليسار بالتقاطع الجاي.	لو سمحت روح يمين عند الشارع الجاي.
هلا أريتني بعض الفساتين ؟	ممكن توريني شوي من الفساطين؟	ممكن تجيبني شوية سجائر؟
أين المقهى ؟	وين الكوفي شوب ؟	وين المقهى؟
لا يمكنك جلب الألعاب النارية إلى كندا .	ما بتقدر تجيب ألعاب نارية على كندا.	ما بتقدر تجيب الالعاب الجوية على كندا.
اعتقد أن هذا عالي قليلا بالنسبة لي .	بتوقع أنه شوي عالي بالنسبة الي.	بتوقع هاد كبير شوي مني.
لم يعد بإمكانك حقيقةً أن تقوم بعمل تصميم دون كمبيوتر بعد الآن .	بطلت تقدر تعمل تصميم بدون كمبيوتر من هون و طالع.	ما بتقدر تعمل صورة بس ما ما تعمل كمبيوتر هسا.
أريد اسطوانة مدمجة .	بدي سي دي.	بدي علبة لبطانيات.
هل يمكنني حجز غرفة بسريرين تطل على المحيط ؟	بصير أحجز غرفة بتختين بطل على البحر؟	بقدر احجز غرفة بغرفين بيفتح على البحر؟
مايومي , هل تسمح أن تملأ هذه الورقة بتوقيعك ؟	مايومي، ممكن تعبيي هاي الورقة بتوقيعك؟	شو اليوم، بتقدر تغسل هاي الورقة زي كروتك؟
هلا أرشدتني إلى مطعم مفضل بين الشبان ؟	ممكن ادلني على مطعم معروف بين الشباب؟	ممكن تحكيني على مطعم ممتاز من أشخاص أشخاص.
حجزنا مقعداً ليوم الخامس والعشرين من أكتوبر في الساعة الحادية عشر صباحاً .	حجزنا مقعد لخمسة و عشرين من شهر عشرة الساعة احدعش الصبح.	حجزتنا مقعد يوم تسعة وعشرين من شهر شهر وعشرين الساعة عشرة الصبح.
إن الناس ودودون جداً .	الناس حابيين كثير.	الناس مبسوط كثير.
متى يتعين علي أن أكون في المحطة ؟	أي وقت لازم أكون بالمحطة؟	متى لازم أكون بالمحطة؟
ليس هذا صحيحاً . أنت دائما تعاملني .	هاظ مش صحيح . إنت دايما بتعاملني.	مش هاد صحيح. انت بتحبني.
ما نوع العصير الذي تفضله ؟	شو نوع العصير اللي بتحبه ؟	شو نوع العصير اللي بدكها؟
هل لي في بعض الفلفل ؟	ممكن أخذ شوي فلفل؟	ممكن تعطيني شوية فلفل؟
احتاج إلى بعض الهدايا التذكارية من نيويورك .	أنا بدي شوية هدايا تذكارية من نيويورك.	بدي شوية هدايا التذكارية من نيويورك.
اسمي " تارو تاناكا " لدي حجز مسبق .	اسمي " تارو تاناكا " عندي حجز من قبل.	اسمي "تارو تانكا " عندي حجز موعد.
إنها الثالثة والربع .	الساعة ثلاثة وربع.	هاي ثلاث و ربع.
كم التكلفة كلها ؟	قديش الكلفة كلها؟	قديش تكلفة كلها؟
لا أدري كم من النقود يجب علىّ تركه كبقشيش ؟	ما بعرف قديش لازم أترك بغشيش.	ما بعرف قديش لازم آخذ مصاري عشان خليني لوزة؟
سآخذ شيكولاتة ساخنة .	بدي آخذ هوت شوكليت.	رح اخذ سجائر ساخنة.
ماذا تنوي أن تفعل عقب الانتهاء من المدرسة . ؟	شو بتخطط تعمل بعد ما تخلص مدرسة؟	شو بدك اعمل بعد ما خلصت من المدرسة؟
أشعر بالغثيان .	بحس حالي بدي أتقيء.	حاس وجع.
ماذا ؟ هل عليك دفع ضرائب عندما يكون لديك أكثر من ثلاثة زجاجات كحول ؟	شو؟ عليك ضرايب بس يكون عندك أكثر من ثلاث قناني كحول؟	شو؟ لازم أدفع ضرائب اذا عندك أكثر من ثلاث زجاجات صابون؟
لقد حصلت على بطارية فارغة .	بطاريتي صارت فاضية.	اخذت بطارية فاضية.
معذرة . أنا طالب جامعي من اليابان . هل أنتم طلاب في جامعة نيويورك ؟	معلش، أنا طالب جامعي من اليابان. إنتوا طلاب بجامعة نيو يورك؟	معلش. أنا أستاذ مدرس من اليابان. انت أستاذ ب جامعة نيويورك؟
من الذي يعزف ؟	مين اللي عم يعزف؟	مين اللي بحكي؟
معطف رائع . هل هو صناعة بريطانية ؟	جاكيت حلو. هاد صنع بريطاني؟	جاكيت حلو. هي صناعة بريطانية؟
هل لديكم فيلم شفاف ملون ؟	عندك فلم شفاف ملون؟	عندك فيلم ملون؟
أين قسم السيدات ؟	وين قسم النسوان؟	وين قسم السيدات؟
جميل الفستان التي ترتدينه .	حلو الفسطان اللي لابسيته.	حلو قماشه اللي بترتديها.
تموج شعر دائم مشدود من فضلك .	كيرلي عطول مشدود، لو سمحت.	لل جلد طويل رقيق لو سمحت.
هل لدينا وقت كاف لإنهاء إجراءات المغادرة ؟	معنا وقت كافي لنخلص إجراءات المغادرة؟	عنا وقت ممكن لحتى اوصل اغراض المغادرة؟
هل هناك جولة بالحافلة تجوب المدينة ؟	في دورة بالباص نلف بالبلد؟	في جولة بالباص تروح المدينة؟
هل أستطيع الحصول على تذكرة متعددة الاستخدام ؟	ممكن أوخذ بطاقة ذكية؟	بقدر اخد تذكرة كبيرة للستخدم؟
كان فيلم " حرب الكواكب " أكثر الأعمال شعبية عام ألف وتسعمائة وأربعة وثمانون .	كان فيلم "حرب الكواكب" من أشهر الأفلام سنة ألف وتسعمائة وأربعة وثمانون.	كان الفلم " لحميا الجو " أكثر الاشياء وبتاعة شهر تسعة و وثلاثين.
أوه ، يجب أن تخطر القنصلية على الفور .	أوه، لازم تبلغ القنصلية هسا.	هاظ ، لازم تتصل السفارة فورا.
هل يوجد ملهى ليلي جيد به عرض رقصة الفلامنكو ؟	في نايت كلوب رايق عنده رقصة الفلامنكو؟	في مطعم لووو مسرح لزز ل للالعاب ل لزز ل للالعاب ل لزز.
لماذا لم تقلع الرحلة ؟ أخبرني عما يجري .	ليش ما طلعت الرحلة؟ قلي شو بصير.	ليش ما تطلع الرحلة ؟ قلي شو ما ما ما ما ما ما ما تطير.
سأصبح بديناً في حال ما ظللت جالساً هنا آكل باستمرار .	رح أصير ناصح لو استمريت قاعد هون آكل دايما.	رح أكون كويس ما كنت اقعد هون أكل كثير.
هل على السيدات ارتداء فستان سهرة ؟	لازم الستات يلبسن فسطان سهرة؟	لازم تركب غلفة حفلة؟
حسنا إذاً ، أريد عصا مضرب أصغر كتلك التي مع جوليا روبرتس .	ماشي يعني، بدي عصاة مضرب اصغر مثل اللي مع جوليا روبرتس.	ماشي، بدي علبة أصبع صغير من هاي اللي مع كوسو ساوت.
أريد أن اتصل هاتفياً بالسفارة اليابانية .	بدي أحكي بالتلفون مع السفارة اليابانية.	بدي اتصل تلفون السفارة اليابانية.
هل هذه السجائر معتدلة ؟	هاي السقاير معتدلة؟	هاي المشروبات خفيف؟
هل هذا طلب شخص آخر .	هاظا طلب واحد ثاني؟	هاد طلب حدا ثاني.
في حالة إمكان ذلك , احجز منضدة بالقرب من النافذة من فضلك .	لو في امكانية, احجزلي طاولة عند الشباك لو سمحت.	لو سمحت, احجز طاولة قريب من الشباك لو سمحت.
هل يمكن أن نحجز طاولة لخمسة أشخاص ؟	ممكن نحجز طاولة لخمس أشخاص؟	ممكن أحجز طاولة خمس أشخاص؟
شركة الخطوط الجوية اليابانية ، طائرة رقم واحد اثنان ثلاثة .	شركة الخطوط الجوية اليابانية، رحلة الطيران رقم واحد اثنين ثلاثة.	شركة الخطوط الطيران اليابانية ، الطيارة رقم واحد اثنين ثلاث.
من فضلك اتصل بي في الفندق عندما تجد حقائبي .	من فضلك، كلمني بالفندق لما تلاقي شنطي.	لو سمحت اتصللي عند الفندق لما تشوف شنتاتي.
ذلك الحد الأدنى للسعر .	هيك أقل سعر.	هاد سعر السعر.
أنت محظوظ .	إنت محظوظ.	إنت محظوظ.
هل سيكون هذا المتجر مفتوحاً غداً ؟	راح يكون هاظ المحل فاتح بكرا؟	رح تكون هاد المحل مفتوح بكرا؟
وصلت الفاتورة لمائة دولار .	وصلت الفاتورة لمية دولار.	وصلت الفاتورة مية دولار.
هل هذا مكتب الاستقبال ؟ هل يوجد عيادة قريبة ؟	هاظ مكتب الاستقبال؟ في عيادة قريبة من هون؟	هاد مكتب الاستقبال؟ في صيدلية قريب؟
كم عمر ابنتك ؟	قديش عمر بنتك؟	قديش عمر بنتي؟
لن ينضم للجولة الاختيارية إلا القليل من الناس .	ما رح ينضم للجولة الاختيارية غير شوي من الناس.	رح أجي للجولة الاختيارة بس كثير من الناس.
إنها مجرد هدية تعبيرا عن تقديري .	هاي مجرد هدية تعبير عن تقديري.	هي هاظ هدية عن آسف.
تحتاج لرؤية أخصائي .	بتحتاج تشوف دكتور متخصص.	بدك أشوف دكتور.
كم تكلّف هي لكل جالون ؟	كم سعر الغلون الواحد؟	قديش بتتكلف كل كل مية مية؟
أيمكنني الحصول على جدول زمني ، من فضلك ؟	ممكن أحصل على جدول الوقت، لو سمحت؟	ممكن اخذ جدول موعد، لو سمحت؟
لقد سُرقت حقيبتي .	انسرقت شنتتي.	سرقت شنتاتي.
نستخدم الأعواد عندما نأكل .	بنستعمل العيدان لما بنوكل.	بستخدم الأوز ما اكل.
حسناً ، في حالة إصرار كليكما , سأذهب معكما .	طيب، اذا انتو الاثنين مصرين، أني راح اروح معكو.	ماشي، ما ما تبعت كلك, رح أروح معك.
في أي محطة سأنزل للذهاب إلى مبنى إمباير ستيت ؟	بأي موقف لازم انزل عشان أروح على عمارة امباير ستيت؟	أي محطة رح انزل على برج لتيسكيت؟
لابد أن تأخذها تسعة وتسعون مرة في اليوم ، قبل الوجبات .	لازم تاخذها تسعة وتسعين مرة باليوم، قبل الأكل.	لازم تاخذها تسعة وتسعين مرة يوم، قبل الوجبة.
لا يا سيدي . هذه الظهيرة محجوزة بالكامل . ومع ذلك يمكن أن تحجز غدا .	لا، يا أستاذ، اليوم بعد الظهر كله محجوز. لكن بتقدر تحجز بكرا .	لا يا سيدي. هاي الساعة محجوزة تقريبا. بس بتقدر تحجز بكرا.
هل هناك طبيب للفندق أو واحد على صلة بالفندق .	في دكتور للفندق أو واحد ع علاقة بالفندق؟	في دكتور للفندق أو واحد على على علاقات للفندق.
المياه الساخنة ليست ساخنة بالقدر الكافي .	المية الحامية مش حامية بشكل كافي.	المي الباردة مش باردة كثير.
هل استرحت في نومك ؟	ارتحت بالنومة؟	ارتحت ع نومك؟
أريد إعادة المال . هل يمكن أن أحصل على مالي ؟	بدي أرجع المصاري. بقدر أوخذ مصرياتي؟	بدي أرجع المال. بقدر اخد مصاري؟
انها باتجاه الجنوب .	هي باتجاه الجنوب.	هي على الشمال.
ما سعر تذكرة درجة أولى إلى إدنبره , من فضلك ؟	كم سعر تذكرة درجة أولى لإدنبره , إذا تكرمت.	قديش سعر تذكرة الدرجة تانى لبولو, لو سمحت؟
عندي قشعريرة .	عندي قشعيرية.	عندي حرارة.
لماذا , شكرا جزيلا . هل أستطيع الارتقاء للقمة ؟	ليش، شكراً كثير الك. بقدر اطلع للقمة؟	ليش, شكرا كثير. بقدر ارجع عالالطابق؟
لا . هل تحب الإبلاغ عنه ؟	لا . بدك تبلغ عنو ؟	لا. بتحب تحكي فيه؟
من فضلك غير هذه الينات إلى جنيهات .	لو سمحت اصرفلي هظول من ين لقنيه.	لو سمحت تغير هاي لسخات.
سآخذ مقاعد درجة رجال أعمال ، أليس كذلك ؟	راح آخد مقاعد درجة رجال الأعمال، صح؟	رح اخد كرسي درجة سيدات شغل، صح؟
لا أستطيع أن أفعل ذلك , لكني سوف أضعها في الحقيبة لك .	ما بقدر اعمل هيك , بس رح احطها بالشنتة الك .	مش قادر أعمل هيك, بس رح احطها بالشنطك.
إنه غالي الثمن إلى حد ما . ألا يمكنك منحي خصماً ؟	هاد كثير غالي. ما فيك تعطيني شوية خصم؟	هو غالية كثير. بتقدر تعطيني خصم؟
إن " السنة " متقلقلة .	ال"سنة" عم تتقلب.	السنة لفة.
سيكون جاهزا بعد غد في المساء .	راح يكون جاهز بعد بكرا المسا.	رح يكون جاهز بعد بكرا بكرا.
هل ليدكم صناديق لإرسال الطرود ؟	عندكم علب لارسال الطرود ؟	ممكن ككصناديق بطلع الغلفة؟
إن عثرت على شيء ، اتصل بي من فضلك .	لو لقيت إشي، رنلي إذا تكرمت.	بتقدر تعطيني اشي ، اتصل معي لو سمحت.
أود تقصيره ببوصة واحدة من هذه المنطقة .	بدي اقصّره بوسطة وحدة من هادي المنطقة.	بدي أقصيره بوقية وحدة من هاي المنطقة.
هل لديكم أي خبز ؟	عندكم خبز؟	عندكم خبز؟
أود بعض البيجامات .	بدي بيجامات.	بدي شوية جاكيتات.
أين يمكنني طباعة الفيلم ؟	وين بقدر أطبع الفلم؟	وين بقدر اشتري الفلم؟
أيمكنك الحضور إلى هنا لإصلاحه ؟	ممكن تيجي هون عشان اتصلحه؟	ممكن تروح هون عشان تصلحها؟
أين يمكنني أن أستقل حافلة لمشاهدة المعالم ؟	من وين ممكن اركب باص لحتى اتفرج ع المعالم؟	وين بقدر أركب باص بشوف المعالم؟
مرحبا يا سيدة ياماجوتشي ؟ فريقك على الخط . قبلت دعوتك . استمر من فضلك .	أهلا وسهلا يا سيدة ياماجوتشي، فريقك عم يكلمك. رديت على دعوتك. استمري، من فضلك.	مرحبا يا يا يا يا يا يا يا ياماوكي؟ فريقك عالالخط. بتقبلوا شكرا. ، ارجع لو سمحت.
هل لك أن تساعدني في الوصول إلى حقيبتي ؟	ممكن تساعدني ألاقي شنتيتي؟	بتقدر تساعدني يوصل شنتاتي؟
آسف لقد نفذ هذا الصنف لدينا .	معذرة، هاد النوع خلص عنا.	آسف هاظ النوع عنا.
ما اسم الشخص الذي تود التحدث إليه ؟	شو اسم الشخص اللي بدك تحكي معه؟	شو اسم الشخص اللي بدك احكي فيه؟
لقد اجتزت هذا الاختبار بنجاح كبير .	عديت الامتحان بنجاح كبير .	طلع هاد الاختبار كويس كثير.
طبقاً لتقرير الطقس ، فإن غداً سيشهد سقوط جليد .	بناءً على النشرة الجوية، راح تثلج بكرا.	بسجل الجو ، بكرا رح تكون ثلج.
لا أستطيع ضبط اللوحة .	مش قادر أزبط الصورة.	مش قادر أحجز اللوحة.
لا زالت غالية جدا . هل من الممكن أن آخذها بثلاثة دولارات ؟	بعدها غالية كثير. ممكن أشتريها بـثلث دولارات؟	ما ما ما ما ما ما هاظ غالية. بقدر اخذها ثلاث دولارات؟
نريد اثنين هامبورجر واثنين قهوة ، من فضلك ، نريد تناولها خارج المحل .	بدنا زوج همبرجر وزوج قهوة، لو سمحت، بدنا ناكلها برة المحل.	بدنا اثنين مارشالر واثنين قهوة، لو سمحت. بدنا تشربها عالفندق.
زدني قليلاً .	زيدني شوي.	خليني شوي.
هل لي بشوكة أخرى ؟	بدي شوكة ثانية؟	ممكن كظة ثانية؟
أنا هنا في مهمة إعلامية .	أنا هون بشغل إعلامي.	أنا هون بعمل دعاية.
إنها ليست أحدث طراز ، أليس كذلك ؟	هاي مش أحدث موديل ، صح؟	مش أحسن طراز، صح؟
أبغي بعض الأقراص المنومة .	بدي حبوب منوم.	بدي شوية دوا.
أي حافلة تذهب إلى وسط المدينة ؟	أي باص رايح عالدوار الرئيسي؟	أي باص تروح على الوسط المدينة؟
أريد الذهاب إلى مركز هارفارد . هل يمكن أن تخبرني عندما نصل إلى هناك ؟	بدي اروح على مركز هارفارد. ممكن تقلي لما نوصل هناك؟	بدي أروح على مكتب هارفارد. بتقدر تحكيلي متى نوصل هناك؟
أريد أن أحجز على شركة نورث وست إيرلينز على الرحلة رقم صفر ثمانية ستة في الخامس .	بدي احجز على شركة نورث وست إيرلينز على الرحلة رقم صفر ثمانية ستة بخمسة الشهر.	بدي احجز على شركة كريلللينز على الرحلة رقم صفر ستة ب تسعة ب تسعة.
لقد استمتعت بالوجبة كثيراً جداً .	كثير استمتعت بالوجبة.	انبسط ب الأكل كثير.
سيكون هناك تأخير بسيط .	راح يكون في تأخير بسيط.	رح يكون في تاخير شوي.
فقط إذا كانت ملكك ، سيدي . هاها ، مزحة صغيرة .	بس اذا كانت ملكك ، يا سيدي . ههههههه، هاي مزحة صغيرة.	بس لو كنت مالها ، سيدي. هاظ. هاظ. حلو صغير.
نستطيع أن نرتب لتنظيف غرفاتكم .	ممكن نرتب معك عشان تنظيف غرفكم.	بقدر أحجز بغسل غرفتك.
وما هي المثانة ؟	وشو هي المثانة ؟	شو المثانة؟
لا أستطيع النوم جيداً أثناء الليل .	ما قدرت أنام مليح بالليل.	مش قادر انام كويس بالليل.
ما هو مستوى مهارتك في عزف الكمان ؟	شو مستواك بعزف الكمان؟	شو نوعتيرتير كك ككك للتصوير ؟
ما هي أكثر الأشياء التي تثير اهتمامك الآن ؟	شو أكثر الأشياء اللي بتلفت انتباهك هسا ؟	شو أكتر الاشياء اللي بتحب اهتمامك هسا؟
اجعل قصة الشعر تتدلى لأسفل , من فضلك .	خلي قصة الشعر تنزل لتحت، لو سمحت.	حط قصة الشعر ببيضة فوق, لو سمحت.
هل لك أن تستدعي لي سيارة أجرة الساعة الثامنة صباح غد ؟	ممكن تجيبلي تكسي بكرا الساعة ثمنية الصبح؟	بتقدر تجيبلي سيارة تاكسي الساعة تسعة الصبح بكرة؟
هلا ملأت هذا النموذج ؟	ممكن تعبي هاذ النموذج؟	بتقدر تغسل هاي النموذج؟
أيمكنك الانتهاء من ذلك بعد عشر دقائق ؟	بتقدر تخلص هاي بعد عشر دقايق؟	بتقدر خلصت من هاد بعد عشر دقايق؟
الملح من فضلك .	الملح لو سمحت.	ملح لو سمحت.
لقد نمت و لم أتيقظ حين رن منبه السادسة و النصف .	نمت و ما صحيت ع منبه الساعة ستة ونص.	دبت ما ما أخش ما أدد لصش ما نشش ما نششش ما نششش ما نششش ما نششش ما نششش ما نششش لصش ما نششش ما نششش ما نششش ما نششش ما نششش ما نششش ما نششش ما نششش ما لشش ت ما مات مات ما أت مات مات ما
نحن من أكبر موردي أجهزة الميكروكومبيوتر .	إحنا من أكبر موردين لأجهزة الميكرو كمبيوتر .	احنا من أكبر الأكلة ل الراديو.
من فضلك أخبرني كيف أملأ بطاقة النزول إلى البر ؟	لو سمحت قلي كيف أعبي بطاقة النزول للبر؟	لو سمحت قلي كيف أخذ بطاقة الذهاب عالبحر؟
دجاج محمر ، من فضلك .	دجاج مشوي، لو سمحت.	لحمة محمر، لو سمحت.
أجل ، ولكن هذا كثير جدا ، ولقد شبعت بالفعل .	أيوة، بس هاي كتير كثير ، وأنا صرت أكلت كفاية.	اه ، بس هاد كثير كثير ، كمان اكلت.
لقد أُغلق علي الباب . هل يمكن أن تفتح بابي , من فضلك ؟	ييي تسكر علي الباب . بتقدر تفتحلي الباب، لو سمحت؟	بتفتحت الباب. بتقدر تفتح الباب, لو سمحت؟
بكل تأكيد . سنكون سعداء لفعل هذا .	أكيد. راح نكون مبسوطين نعمل هيك.	أكيد. رح نكون مبسوط من هيك.
يقولون إن الأنفلونزا منتشرة هناك .	بيقولوا انو الإنفلونزا معمية هنيك.	بتوقع هاظ الجوية موجودة هناك.
هل ستدفع شركة الطيران رسوم الفندق والوجبات ؟	رح تدفع شركة الطيران رسوم الفندق والوجبات؟	رح تدفع شركة الطيران رسوم الفندق و الأكل؟
نسيت تذكرة الطيران الخاصة بي في الفندق .	نسيت تذكرة الطيارة قيتي بالفندق.	نسيت تذكرة الطيران تاعي الفندق.
هل يمكن أن احصل على احدى المجلات أو شيئ من هذا القبيل ؟	ممكن أوخذ وحدة من المجلات أو شي زي هيك؟	بقدر اخد هاظمجلات من اشي هيك؟
تناسبني تماما .	مناسبيتني كثير.	بتناسبي كثير.
خذني إلى المستشفى .	خذني على المستشفى.	خذني على المستشفى.
ربما كان يعاني سّدَّة تنفسية .	ممكن عنده صعوبة بالتنفس.	ممكن كان عندي لشة اشعة.
كم تكلفة الذهاب إلى فندق سي ؟	قديش بتكلف الروحة لفندق سي؟	قديش بتكلف اروح على فندق سي؟
هل هناك أي غرف خالية في عربة النوم ؟	ظل في أي غرف فاظية بعرباية النوم؟	في غرف فاضي بالسيارة النوم؟
هل يوجد بوتيك قريب من هنا ؟	في بوتيك قريب من هون؟	في تاكك قريب من هون؟
عندما أرى الأسعار بهذا الرخص ، يبدو الأمر سخيفاً أن أشتري أي شيء في اليابان .	لما أشوف الأسعار بهالرخص ، بحس أنه مسخرة الواحد يشتري أي شي باليابان.	ما اشوف سعر هاي سعرها ، شكله حلو ب أشتري اشي باليابان.
لم يخرج من الماكينة شيء .	ما طلع من الماكينة إشي.	ما خرج من الحمام اشي.
كم كان ثمنها ؟	قديش كان حقها ؟	قديش بتكلف؟
أريد هدية بمناسبة الذكرى السنوية .	بدي هدية لمناسبة الذكرى السنوية.	بدي هدية بمناسبة العطلة السنة.
علي أن ألحق طائرة متجهة للوس أنجليس باكر صباح غد .	لازم ألحق طيارة لوس أنجلوس بكرا الصبح بكير.	لازم اخذ الطيارة رايح على لللس لتارو الصبح الصبح الصبح.
يا صاح , أتعرف أي مكان يستحق الرؤية قريبا من هنا ؟	أخوي، بتعرف أي مكان محرز الشوفة قريب من هون؟	يا طيب, بتعرف أي مكان لازم اشوف قريب من هون؟
عندي الكثير من الوقت .	عندي وايد وقت.	عندي كثير وقت.
من أين يمكنني شراء بعض الهدايا التذكارية ؟	منين بقدر أشتري شوية هدايا تذكارية ؟	من وين بقدر اشتري هدايا التذكارية؟
أنظر إلى هذا . انظر إلى هذا . سوف تخبرني أن الاختلاف بين هذا الشاب وذلك الشاب هو الحظ ؟ محمد ، يقف بالسيارة في جانب الطريق ، وأنت ؟ لن تمانع في أن أنام معك هنا . أنا متأخر . كان لقاء جميل معك ؟	شوف هاظ. شوف هاظ. راح تحكيلي انو الفرق بين هالشب وهذاك الشب هو الحظ؟ محمد، واقف بالسيارة على زقاق الشارع، وإنت؟ ما راح تعترض اذا قعدت معك هون. انا تأخرت. كان لقاء حلو معك؟	شوف هاد. شوف هاد. شوف هاد. هاظ. شوف هاد. هاظ. رح تحكيها عن هاذ. هاظ. هاظ. شايف هاذ. هاظ. هاظ. شايف هاذ. هاظ. هاظ. شايف هاذ. هاظ. هاظ. رح تحكيها زي هاي. هاظ. هاظ. هاظ. شايف هاذ. هاظ. شوف. شوف. شوف. شايف..
أعمل في شركة تجارية .	أني بشتغل بشركة تجارية.	بشتغل بشركة تجارية.
أفهم ، لكن لا أستطيع أن أقولها .	فاهم، بس بقدر أقولها.	فهمت، بس بقدر أحكيها.
نصف زجاجة , من فضلك .	نص قنينة ، لو سمحت.	نصف قنية, لو سمحت.
متى تقام مباراة كرة القدم ؟	متى بتبلش مباراة كرة القدم؟	متى رح تكون مباراة مباراة كرة الكرة؟
ما هو متوسط أسعاركم للفاكس الدولي كل شهر ؟	كم معدل تكلفة الفاكس الدولي كل شهر؟	شو سعرك للفاكس الدولي كل شهر؟
انتظر دقيقة من فضلك .	استنى دقيقة لو سمحت.	رح أخذ ساعة لو سمحت.
هل هو محجوز بالكامل ؟	هو محجوز كله؟	هو محجوز كامل؟
شيء خطأ مع حقيبتك .	اشي غلط بشنتك .	اشي غلط مع شنتتك.
كلا منا يريد أن يحاسب على وجبته .	إحنا كل واحد بدو يدفع عن أكلته.	لا لا مننا بدنا أحجز على الوجبة.
ألم تتلق الاستمارة بالطائرة ؟	ما أخذت الاستمارة بالطيارة؟	ما بتخذ المارة الطائرة؟
هل لديك أي شيء لفترة أطول قليلاً ؟	عندك أي اشي لوقت أطول شوي؟	عندك إشي شوي شوي شوي؟
أجل ، من فضلك أرسله إلى الغرفة اثنا عشر أربعة وثلاثون .	أيوه، لو سمحت وديه على الغرفة اثنعش أربعة وثلاثين.	اه ، لو سمحت ابعثها على الغرفة ثلاث وعشرين.
أين البحيرة ؟	وين البحيرة؟	وين البحيرة؟
هل هناك حافلة تذهب مباشرة إلى هناك ؟	في أي باص بروح هناك مباشرة؟	في باص تروح عالطلع هناك؟
أريد هذا الطراز لخمسة أماكن مرصعة .	بدي هاي النوعية لخمس أماكن مرصعة.	بدي هاد الموديل خمس أماكن مرصعة.
هل لك أن تغلف هذه كالهدية ؟	ممكن تلفلي هاي كهدية؟	بتقدر تغسل هاي هدية؟
نعم لدينا هذا ، سوف نجهزها لك .	اه موجود عنا. رح نجهزلك اياه.	اه عنا هاد ، رح أجهزها إلك.
هل يمكنك تبديل هذه بواحدة جديدة ؟	ممكن تبدلي هاي بوحدة جديدة؟	بتقدر تغير هاي وحدة جديدة؟
عفواً . ستكون جاهزة في غضون خمس دقائق .	عفوا. رح تكون جاهزة خلال خمس دقايق.	عفوا. رح تكون جاهزة تقريبا خمس دقايق.
أين يمكنني أن أشتري إبريقاً ؟	من وين بقدر اشتري بريق؟	وين بقدر اشتري لطاطة؟
أعتقد أن عمره أكثر من خمسين سنة .	بتوقع عمره اكثر من خمسين سنة.	بتوقع ما عمر من خمسين سنين.
أود أن أطلب , من فضلك .	بدي أطلب , بعد إذنك.	بدي أطلب, لو سمحت.
معذرة . كيف يمكنني الوصول إلى المصرف ؟	معلش، كيف بقدر أوصل للبنك؟	عفوا. شلون بقدر اوصل على البنك؟
لدي بعض الملابس للمغسلة .	عندي شوية وعية للغسيل.	عندي شوية ملابس للمغسلة.
كريمة وسكر ؟	كريمة وسكر؟	حلو ل سكر؟
هل يوجد أي قطار سريع إلى بوسطن ؟	في أي قطار سريع لبوسطن؟	في قطار سريع على بوسطن؟
الحجوزات في السابعة ، تحت اسم مانو .	حجوزات الساعة سبعة، بإسم مانو.	حجزة الساعة سبعة ، على اسم جون.
أين أفضل مكان لمشاهدة المعالم ؟	وين أحسن مكان لشوفة المناظر؟	وين أحسن مكان اشوف المعالم؟
هل يمكنك أن تريني كيف أضع الغاز ؟	ممكن توريني كيف أحط الغاز؟	بتقدر تحكيني كيف حط العصير؟
علىّ أن أذهب ، سأتصل بك لاحقاً .	أني لازم أروح. رح أحكي معك بعدين.	لازم أروح ، رح احكي معك بعدين.
لا كهرباء .	ما في كهربا.	ما كهرباء.
ثلاثون دولاراً وثمانون سنتا .	ثلاثين دولار وثمانين سنت.	ثلاث وثلاثين دولار و ثلاثين سنت.
هل تعرف طبيب أسنان جيد ؟	بتعرف دكتور اسنان كويس؟	بتعرف دكتورأسنان كويس؟
هل من الممكن أن أمكث في غرفتي حتى الثانية مساءً ؟	ممكن أظل بغرفتي للساعة ثنتين المسا؟	ممكن أحجز غرفتي لحد الساعة ثلاث المسا؟
إن حول غرفتي ضجيجا بالغا .	في ضجة كبيرة حوال غرفتي	في غرفتي اشي كثير.
كم ستستغرق لكي تطلب ؟	قديش بدك يعني عشان تطلب؟	قديش بدك بدك؟
معدتي تؤلمني بعد الوجبات .	معدتي بتالمني بعد الوجبات.	بخشتي بعد الأكل.
نفضل مائدة بجوار النافذة .	بنحب طاولة جنب الشباك.	بحب طاولة جنب الشباك.
كنت على رحلة يونيتد إيرلاينز رقم ثمانية اثنان ثمانية .	كنت برحلة يونايتد إيرلاينز الرقم ثمانية اثنين ثمانية.	كنت على رحلة لطيران رقم ستة اثنين تسعة.
هل لك أن ترسم لي خريطة , من فضلك ؟	ممكن ترسملي خريطة، لو سمحت؟	ممكن أرسملي خريطة, لو سمحت؟
هل بإمكاني اللمس ؟	بقدر ألمسه؟	بقدر اخد رض؟
يصعب العثور على هذا المكان . إنه في طريق ضيق يتفرع من الطريق الرئيسي .	صعب يلتقى هالمكان. هو بدخلة بتتفرع من الشارع الرئيسي.	صعب بلاقي هاد المكان. هو طريق صغير من الطريق الرئيسي.
هلا أخذت هذه السراويل ؟	ممكن توخذ هاي البنطلونات؟	ممكن اخذ هاي التيلة؟
حسنا . إنها تتكلف خمسة وثمانون دولارا في البريد العادي وثلاثة دولارات في التوصيل الخاص .	طيب. بتكلف خمسة وثمانين دولر بالبريد العادي وثلاث دولرات بالتوصيل الخاص.	ماشي. بتكلف خمسة وتسعين دولار بالبريد العادي و ثلاث دولارات بالشحن الخاصة.
إذاً يمكنني بكل ثقة أن أزكي برج مدينة سان فرانسيسكو . فهذا يعطيك فكره عن سان فرانسيسكو .	يعني بنصحك عالأكيد ب برج مدينة سان فراسيسكو. رح يعطيك لمحة عن سان فرانسيسكو.	لو سمحت ، بقدر أزاكي برج المدينة سان فرانسيسكو. هاي تعطيني فكرة عن سان فرانسيسكو.
لدي تقدير كبير للموسيقى الكلاسيكية .	كثير بقدر الموسيقى الكلاسيكية.	عندي بتوقع كبير موسيقى الجاز.
من فضلك استعمل غرفة القياس هناك .	من فضلك استخدم غرفة القياس هنيك.	لو سمحت أستعمل غرفة القياس هناك.
سر في نفس الاتجاه حوالي خمس دقائق ثم لف لجهة اليسار .	امشي بنفس الاتجاه حوالي خمس دقايق و بعدين ارجع على الشمال.	روح نفس الخط تقريبا ثلاث دقايق بعدين لرر على اليسار.
هل أجعله يعاود الاتصال بك عندما يعود ؟	بتحب أخليه يرجع يرنلك بس يرجع؟	رح أجيك رح يوصل معك بعدين؟
من المرجح أن محبا للإبداع الفني مثلك سيستمتع اللوحات الزيتية غير التقليدية وعروض الموسيقى بالشوارع .	متوقع من محب للابداع الفني مثلك راح ينبسط باللوحات الزيتية والموسيقى وعروض الموسيقى بالشوارع.	أكيد مش عاجبني فنان الخاص زيك رح ك رح نستمتع اللوحة البلاستيكة مش الأشياءة.
هل رشحت لي رحلة قصيرة ؟	هل اخترتلي رحلة قصيرة؟	بتنصحلي رحلة قصيرة؟
إنها سبعة عشر ايه . اوه ، انا آسف . لقد أخطأت .	هي سبعتعشر ايه . اوه ، أني آسف . غلطت	هاي سبعة وعشرين إيه. أنا آسف. أنا آسف. أنا غلط.
كم المدة التي قضتها هي حتى الآن في المملكة المتحدة ؟	قديش المدة اللي عاشتها بإنجلترا؟	قديش بتعشها هي هسا ببريطانيا؟
هل قرّرتَ ؟	قررت؟	بتتتت؟
هل نذهب إلى أي مكان متحدثين مثل ذلك ؟	راح نظل نحكي هيك وين ما نروح؟	رح نروح على مكان بحكيين هيك؟
سأذهب كي أسأل البواب عن الأجرة المناسبة .	رايح اسأل البواب عن الأجرة الصحيحة.	رح أروح اروح عشان احكي الباب على الأجرة المناسب.
اللون البني محبب هذا العام .	اللون البني مرغوب هالسنة.	باللون أبيض حلو هاي السنة.
هناك قطع في بلوزتي . أتساءل هل يمكنك أن تخيطيه لي ، من فضلك ؟	في مزع ببلوزتي. بدي اسألك اذا بتقدر تخيطلي اياه، لو سمحت؟	في قطع بشنطتي. بتقدر تتخذلي ، لو سمحت؟
هل هذه هي آخر محطة ؟	هاظا آخر موقف؟	هاي أول محطة؟
هل يمكنني تركها في أي مكان من البلاد ؟	بقدر أسيبها بأي مكان بالبلد؟	بقدر اترك مكان من البلد؟
أريد بعض التفاح ، من فضلك .	بدي شوية تفاح، لو سمحت.	بدي شوية التفاح، لو سمحت.
أخشى أن لا يكون هنا أية دورة لتعليم الجولف .	خايف ما يكون في دورة لتعليم الجولف	خايف ما يكون هون للعبوا الجولف.
دعني أحول هذه المكالمة إلى المسئول .	خليني أحوّل هاي المكالمة للمسؤول.	خليني أغير هاي مكالمة لل مسؤل.
هل يمكن أن تحجزوا في العرض ؟	ممكن تحجزولي بالعرض؟	بتقدر تحجزنا بالعرض؟
أنا أقيم في فندق هيلتون .	أنا قاعد بفندق الهلتون.	أنا بقعد بفندق هيلتون.
أحب هذه الخدمة بتقديم شامبانيا للتحية بعد الإقلاع . دعني أشرب فى صحتك .	بحب هاي خدمة توزيع شامبانيا للترحيب بعد ما نطير. خليني أشرب بصحتك.	بحب هاي الخدمة بوخذ ل لجولة بعد الطيران. خليني اشرب ع سكر.
ما هو الحد الأدنى للعمر لفعل ذلك ؟	إيش أقل عمر مسموح يعمل هيك؟	شو سعر الأقل العمر لازم اعمل هيك؟
إلى فندقي ، من فضلك ، إن عنوان فندقي في هذه الورقة .	للفندق تبعي، لو سمحت، العنوان تبع الفندق ع هالورقة.	لفندقي، لو سمحت ، العنوان فندقي بال الورقة.
أريد لقاء السيد ويليم .	بدي أشوف الأستاذ ويليم.	بدي أشوف السيد هويييي.
النبيذ ليس باردا بشكل كافي . هل نمكنك أن تجعله أكثر برودة ؟	الواين مش بارد كفاية. ممكن تبرده اكثر؟	هاظ هاظ مش بارد كثير. بتقدر تضلها أكثر باردة؟
بكم هذا العطر ؟	بقديش هاظا العطر؟	كم هاد الجو؟
بالتأكيد سوف ترسلهم ، أليس كذلك ؟	أكيد راح تبعتثم، صح؟	أكيد رح تبعثها ، صح؟
أسف ، هذا المكان محجوز بالفعل .	آسف، هاذ المكان محجوز فعلاً.	اسف ، هاد المكان محجوز كثير.
من فضلك أعطني بعض النقود الفكة .	لو سمحت أعطيني شوية فراطة.	لو سمحت اعطيني شوية مصاري.
لا أعرف شيئاً عن هذا الأمر .	ما بعرف إشي عن هالشغلة.	ما بعرف إشي عن هاد اشي.
حفلتك مقامة الآن . تفضل .	حفلتك مبلشة هسا. تفظل.	حفلةتك بتكون موجودين هسا. تفضل.
أخطط للبقاء لمدة اثنا عشر يوماً .	بخطط أظل اثنعشر يوم.	بدي أظل لمدة عشرين يوم.
يوجد الكثير من السائحين بالقرب من المبنى ، ويبدو أنهم تجمعوا لإلقاء نظرة على ما يحدث .	في كتير سواح حوالين البناية، شكلهم متجمعين عشان يشوفوا شو اللي بصير.	في كثير لولاد من المبنى ، شكله من الركاب قريب من المبنى.
هل لك أن تقدر التكلفة قبل أن تبدأ العمل فيها ؟	ممكن تقدر قديش بكلف قبل ما تبدا شغل فيه؟	بتقدر تقدر تكلفة قبل ما بتشتغل فيها؟
نعم . تم نقل أمتعة شخص آخر إلى غرفتي تواً . من فضلك ، هل من الممكن أن تقوم بفحصها ؟	اه، في شناتي لحدا ثاني وصلت غرفتي هسا.لو سمحت، ممكن تشوفها؟	اه. حجزت أغراض حدا ثاني على غرفتي هسا. لو سمحت. بتقدر تفحصها؟
أريد أن أحصل على تعويض لذلك .	أنا بدي اوخد تعويض عن هاظ.	بدي أخذ تعويض.
بالتأكيد , كن على راحتك .	أكيد، كون على طبيعتك	أكيد, مش مش شغلك.
إن ثمة خطأ ما في بطاقة المفتاح هذه ، أعطني غيره ، من فضلك .	فيها غلطة شكلها بالكارت هاي، عطني وحدة ثانية، الله يخليك.	في خطأ في بطاقة المفتاح هاي ، اعطيني غيره ، لو سمحت.
من فضلك اتصل لي برقم ثلاثة اثنان ستة اثنان تسعة واحد ثمانية .	لو سمحت، رنلي على الرقم ثلاثة اثنين ستة اثنين تسعة واحد ثمانية.	لو سمحت اتصللي رقم ثلاث اثنين ستة اثنين تسعة واحد تسعة.
أين مدخل مترو الأنفاق ؟	وين دخلة المترو؟	وين المدخل المترو ؟
معذرة . ولكني أريد تسليم تقرير السرقة .	معلش، بس بدي أسلم تقرير السرقة.	عفوا ، بس بدي أخذ تقرير السرقة.
هذا المقاس ، الذي تسميه المقاس العادي ، سوف تجده هنا .	هاذ الحجم ، اللي بتسميه حجم عادي، راح تلاقيه هون .	هاد مقاس ، اللي إسمك مقاس العادي ، رح تلاقي هون.
إنه رديء الصنع .	هو مش صنوع منيح.	هو صح الصح.
هل يمكن أن تخبرني عن ساعات العمل ؟	ممكن تحكيلي عن ساعات الشغل؟	بتقدر تحكيلي شو ساعات الشغل؟
اعطني شهادة طبية , من فضلك .	عطيني وصفة طبية ، لو سمحت .	اعطيني شهادة طبية, لو سمحت.
ليس معي فكة صغيرة .	ما معي فراطة.	ما معي عصير صغيرة.
هل يمكن أن أرى هذا ؟	ممكن أشوف هاظا؟	بقدر أشوف هاد؟
ليس لدى أي شئ لكي أعلنه .	ما عندي أي اشي عشان أعلنه.	ما عندي اشي عشان أجيها.
أعتقد أنني تركت كاميرتي وغادرت عندما كنت أتناول العشاء هنا الليلة الماضية .	بظن اني تركت كميرتي و روحت لما كنت اكل هون امبارح عالعشا.	بتوقع اني تركت الكاميرا بروح من هون الليلة الجاي.
دعنا نجتمع لنبحث الأمر أكثر .	خلينا نلتقي عشان اناقش هاظ الموضوع أكثر.	خلينا خلينا خلينا خلينا نشوف الموضوع أكثر.
هيه ، هذا فستان جميل حقا .	مرحبا ، هاذا فعلا فسطان حلو.	هيه ، هاد قماش حلو.
من فضلك كن صديقي بالمراسلة .	من فضلك, كون صاحبي عالتواصل.	لو سمحت يا صاحبي بالواتساب.
أعطني خمسين ، من فضلك .	اعطيني خمسين ، إذا سمحت.	اعطيني خمسين ، لو سمحت.
ما هذا المكان الذي نمر به الآن ؟	شو هالمكان اللي بنمر فيه هسا؟	شو المكان اللي رح تروحها هسا؟
هل لي في استعارة بعض البياضات ؟	ممكن أستعير شرارشف؟	ممكن تعطيني شوية أبيضات؟
أوه , يبدو كأنه قرعة .	أوه، شكله قرعة .	هاظ, شكله القرعة.
اشعر كأن هناك تحديق في . هل من النادر رؤية شخص ياباني ؟	حاسك بتسرح فيه. لهاي الدرجة قليل تشوف واحد ياباني؟	حاس انه في ررر بدد بررت بي. كثير كثير اشوف حدا ياباني؟
سنبعث لك بالبريد عشرين عينة إضافية .	رح نبعتلك عالبريد عشرين عينة زيادة.	رح تبعثلك بالبريد عشرين عينة زيادة.
إن الرصيف رقم خمسة يقع هناك .	الرصيف رقم خمسة موجود هناك.	الشارع رقم خمسة بقدر هناك.
أين يوجد مكان لطيف لقضاء نزهة ليوم واحد ؟	وين بلاقي مكان لطيف أظل فيه رحلة ليوم واحد؟	وين مكان حلو عشان أجولة بيوم واحد؟
يا سيد كاواي لدينا مائدة لك الآن . تفضل من هنا .	يا أستاذ كاواي، عنا طاولة الك حاليا. تعال من هون.	يا سيدي يا سيدااا عنا طاولة إلك هسا. تفضل من هون.
لا توجد مشكلة . إذا حضرت في الخامس من سبتمبر ، فسيكون بإمكانك الاستمتاع بعرض فيلم علمي لأن عندنا يوماً خاصاً مفتوحاً أول يوم جمعة من كل شهر .	ما في مشكلة. اذا اجيت بخمسة تسعة ، بتقدر تستمتع بالفلم العلمي لأنه احنا عنا يوم مميز مفتوح بأول جمعة من كل شهر.	ما في مشكلة. اذا رحت بخمسة شهر ، رح تروح على يوم يوم يوم يوم يوم يوم يوم يوم يوم يوم يوم يوم يوم يوم يوم يوم يوم يوم يوم يوم يوم يوم يوم يوم يوم يوم يوم يوم يوم يوم يوم يوم يوم يوم يوم يوم يوم يوم يوم يوم يوم يوم يوم يوم يوم يوم يوم يوم يوم يوم يوم يوم يوم يوم يوم يوم يوم يوم يوم يوم يوم يوم يوم يوم يوم يوم يوم يوم يوم يوم يوم يوم يوم يوم يوم يوم يوم يوم يوم يوم يوم يوم يوم يوم يوم يوم يوم يوم يو…
هل بإمكاني الحصول على طبق آخر مثل هذا ؟	بقدر آخذ صحن ثاني مثل هاذ؟	بقدر اخد اكل ثاني زي هاد؟
لا تهتم . على أي حال ، خذني من فضلك إلى مركز الحي الصيني . سأحاول أن أجده بنفسي .	ما تشيل هم. يلا، خذني لو سمحت لمركز الحي الصيني. راح احاول ادور الجهة وحدي.	ما بتشتغل. لو سمحت ، خذني على مركز البلد الياباني. رح الاقيه لحالي.
أهه ، هيا . دولارين فقط .	اها، يلا. بس دولارين.	أه ، يلا. دولارين بس.
سندويتشان برجر بالجبن ، من فضلك .	اثنين برجر بالجبنة، لو سمحت.	سندفين برجر بطاطين، لو سمحت.
أرغب في كريم مسائي للبشرة .	بدي كريم ليلي للبشرة.	بدي عصير بالليل.
متى سنقلع ؟	أميت راح نقلع؟	متى رح ننزل؟
هذا طيب ، على ما يبدو .	هاذ طيب ، من شكله.	هاظ حلو ، بس شكله.
حسنا , الوقت متأخر إلى حد ما . أعتقد أنني يجب على أن أغادر الآن . شكرا جزيلا لك على الأمسية الرائعة .	ماشي, الوقت صار متأخر شوي. بظن انو لازم اروّح هسا. كتير شكرا على الليلة الممتعة.	ماشي، الوقت متأخر كثير. بتوقع اني لازم أروح هسا. شكرا كتير الك على حفلة حلوة.
لقد سقطت من على درجات السلم .	وقعت من على درج السلم	سقطت من درجة السلم.
هذه السن في المقدمة تؤلمني .	هالسنة في الامام بتوجعني.	هاي السن بالالطابقي بتوجعني.
من أي نوع من الجلد الصناعي صُنعت حقيبة السفر هذه ؟	شو نوع الجلد الاصطناعي المصنوع منه شنطة السفر هاي؟	شو نوع الجلد اليابانية لصبغ شنتة السفر هاي؟
أين نشأت سمكات الفراش هذه ؟	من وين جاية سمكات الفراش هاي؟	وين كنت سمكات الحمام هاي؟
سأخطط لإرسال فواتير حاجياتي اليومية ، لذا من فضلك أخبرني العنوان و اسم الشخص المسئول من فضلك .	رح أبعث فواتير حاجاتي اليومية، عشان هيك لو سمحت أعطيني عنوان واسم الشخص المسؤول.	رح أخطط نرسل الفاتورة اليوم، لو سمحت.
أريد نسخة من تقرير السرقة .	بدي نسخة من تقرير السرقة.	بدي نسخة من تقرير السرقة.
أريد السفر من شنغهاي إلى هاواي بالباخرة .	بدي أروح من شنغهاي لهاواي عالسفينة.	بدي اروح من طوكيو على هاواي بالطيارة.
جريدة باللغة الإنجليزية ، لطفاً .	جريدة بالانجليزي، لو سمحت.	جريدة انجليزي ، لو سمحت.
هل هناك سيارة ليموزين ؟	في سيارة ليموزين؟	في سيارة اللي لوزين؟
لا أريد واحدة ضخمة .	ما بدي وحدة دفشة.	ما بدي وحدة كبيرة.
أريد فندقاً آمنا يقدم إفطاراً جيدا ، من فضلك ؟	بدي فندق آمن ، بقدم فطور كويس ، لو سمحت ؟	بدي فندق كويس بحجز الفطور كويس، لو سمحت؟
أربعة وعشرين دولاراً . هل تريد المزيد ؟	أربعة وعشرين دولار. بدك كمان؟	أربعة وعشرين دولار. بدك أكتر؟
وقعت منى الشوكة . من فضلك أحضر واحدة أخرى .	وقعت مني الشوكة. لو سمحت جبلي وحدة ثانية.	وقعت مني الصراة. لو سمحت جيب وحدة ثانية.
لاحظ الفجوة ، لاحظ الفجوة ، ثم قرب الأبواب ، من فضلك .	لاحظ الفتحة، لاحظ الفتحة ، بعدين قرب الابواب، لو سمحت.	شايف الشباك ، شوف الشباك ، بعدين جنب الباب ، لو سمحت.
من فضلك ساعدني أعثر على مرشد يتحدث اليابانية .	لو سمحت ساعدني ألاقي دليل سياحي بحكي ياباني.	لو سمحت يساعدني أقدر الاقي دليل بحكي ياباني.
ماذا عن هذه النماذج البلاستيكة ؟	شو رأيك بموديلات البلاستك هاي؟	شو عن هاي النماذج البلاستيكية؟
دعونا نحتفل ، هكذا قال وآخذني إلى بار . وقال إنه سيُجري مكالمة هاتفية وغادر ولم يعد أبداً وتحملت أنا وحدي عبء فاتورة ضخمة .	"خلينا تحتفل" هيك قال وأخذني على البار. حكى انه رايح يعمل مكالمة وراح وما رجع إجى أبداً وأنا تورطت بفاتورة كبيرة.	يلا ، هاظ زيحكي ، هيكحكي ، هاظحكي ، هاظحكي ، رح آخذني على بار. هاظ زي زيحكي. رح آخذني على بار. هاظ رح آخذني على بار. هاظ زي زيحكي. رح أخذني على بار. هاظ زي زيحكي. رح أخذني على بار. هاظ زي زيحكي. رح أخذني على بار. هاظ زي زيحكي. رح أخذني على مرحبا ، هيك رح هاظحكي هاظحكي
أرغب في خلع أسناني .	أنا حاب أقلع سناني.	بدي أظف أسناني.
أريد منبه ، من فضلك .	بدي منبه، لو سمحت.	بدي كافي ، لو سمحت.
ما توقيت إجراءات مغادرة الفندق ؟	متى منقدر نعمل الاجراءات حتى نطلع من الفندق؟	شو وقت خدمة مغادرة الفندق؟
أريد أن أحصل على استراحة .	بدي أوخذ بريك.	بدي أحجز استراحة.
هذه الغرفة اثنان صفر واحد . أريد أن أطلب إفطار الغد .	هاي الغرفة رقم اثنين صفر واحد. بدي أطلب فطور بكرا.	هاي الغرفة اثنين صفر واحد. بدي أطلب الفطور بكرا.
هل هذا مصنوع من القطن ؟	هاذ مصنوع من القطن؟	هاد مصنوع من القطن؟
ما هو مقدار الرسوم للوزن الزائد ؟	قديش الدفع على الوزن الزايد؟	قديش سعر رسوم للسعر زيادة؟
لدي معداتي الخاصة .	عندي أدواتي الخاصة.	عندي اغراضي الخاصة.
في غرفة انتظار بالمحطة .	في غرفة انتظار بالمحطة.	غرفة موعد بالمحطة.
كيف أستطيع مساعدتك ؟	كيف بقدر اساعدك ؟	كيف بقدر يساعدني؟
ادخل . من فضلك ضعها على المائدة هناك .	أدخل. لو سمحت حطها على الطاولة هنيك.	ادخل. لو سمحت حطها عال طاولة هناك.
حسناً . سأتأكد أن حقائبك ستكون هنا .	طيب . راح أتأكد إنه الشناتي رح تكون هون.	ماشي. رح متأكد انه شنتك رح تكون هون.
سنأتي في السابعة .	رح نيجي الساعة سبعة.	رح نصل الساعة سبعة.
حقاً . اليوم هو الأحد ، والأحد هو أسوء الأيام .	فعلاً. اليوم الأحد، والأحد أسوأ الأيام.	عنجد. اليوم هو الاحد، يوم الاحد، يوم الاحد ، الأحد كل كل الأيام.
إما أن تصلحها أو تستبدلها ، من فضلك .	يا تصلحها يا تبدلها، لو سمحت.	ممكن تصلحها او تغيرها ، لو سمحت.
ربما أعطيك إجابة أفضل من تلك بعد عرضين .	يمكن أعطيك جواب أحسن من هاذ بعد ما أشوفه مرتين.	ممكن تعطيني دليل أحسن من هاي بعد العرضين.
إن ارتفاعه ألفان وأربعمائة متر .	إنو ارتفاعه ألفين وأربعمية متر.	ارتفاعه مية مية ومية متر.
هل يمكن أن أستعيد متعلقات ؟	ممكن أرجع متعلقاتي؟	ممكن أرجع اغراض؟
هل بإمكاني إجراء طلبية ؟	بقدر اطلب؟	بقدر أعمل طلبة؟
إنه خطئي . ليس خطأك .	هاي غلطتي. مش غلطتك.	هو غلطي. مش غلطك.
لا يوجد أي منها .	ما في منهم.	ما في أي منها.
أريد غرفة بمنظر جميل .	بدي غرفة مع إطلالة حلوة.	بدي غرفة حلوه.
أنا ياباني .	أني ياباني.	أنا ياباني.
هل لديكم دبابيس زينة ذات تصميمات رائعة ؟	عندك بروشات شكلها حلو؟	عندكم جاكيت حلويات لأزياء جميلة؟
يبدوا أنني غير قادر على الحصول على الماء الساخن .	شكله مش قادر يجيب ميّة ساخنة.	شكله مش قادر أخذ مي ساخنة.
هلا وقفت معي لالتقاط صورة ؟	بتقدر توقف معي شوي عشان نصور صورة؟	ممكن اقعد معي صورة؟
لا أعتقد أن ذلك يناسبني فجلدي جاف إلى حد ما .	ما بعتقد انه هاد بلبقلي، جلدي ناشف كثير.	ما بتوقع انه هيك بظن هاظ بتناسبي ب جلدي ناشف كثير.
أكون ممتنا جدا لو أخذتني إلى الشاطئ .	راح أكون كثير ممنون لو توخذني لعند الشط.	رح أكون مبسوط كثير اذا اخذتني على البحر.
هل يمكنني الحصول على تذكرتين درجة ثانية لشيكاغوا , من فضلك ؟	ممكن أحجز تذكرتين لشيكاغو من الدرجة الثانية، لو سمحت؟	بقدر اخذ تذكرتين درجة ثانية لكااا، لو سمحت؟
أجل ، أنا . لقد كانوا يعيشون بجواري في كاليفورنيا لكنهم انتقلوا إلى فلوريدا منذ عامين . ماذا عنك ؟ هل تسافر بمفردك ؟	أيوه، أنا. كانوا عايشين بحدي بكاليفورنيا بس انتقلوا على فلوريدا من سنتين. شو بالنسبة الك؟ بتسافر لحالك؟	اه ، أنا. انا. انا. انا. كان انا. شو عنا؟ تروح معك؟ بتسافر معك؟
أنا من طوكيو .	أني من طوكيو.	أنا من طوكيو.
أي منتجات صوفية أخرى ؟	في منتجات صوف ثانية؟	شو أنواع زهور ثانية؟
هل من الممكن أن تخبرنا كيف تقيم هذه الخطة ؟	ممكن تحكيلنا كيف بتعمل هاي الخطة ؟	بتقدر تحكيلي كيف بتحجز هاي الخطة؟
مساء الخير . أهلا .	مسا الخير. أهلين.	مسا الخير. مرحبا.
اخرج من ذلك الباب ، وانتظر عند المحطة رقم ستة .	طلع من هاي الباب، و انطر عند المحطة رقم ستة.	انزل من هاد الباب ، شوف عند محطة رقم ستة.
سبعاً ، من فضلك .	سبعة، لو سمحت.	سبعة ، لو سمحت.
مهزوز ، وليس مضروب .	محرك، مش مخفوق.	مهزوز ، مش غلط.
ثلاثة أيام .	ثلاث أيام.	ثلاث أيام.
تريد أن تشتري ثوبا .	هي بدها تشتري فسطان.	بدك تشتري فستان.
لا ، ليس بعد ، هناك الكثير نختار فيه .	لا، بعده ، في كثير عشان تنقي منه	لا، ما ما هسا، هناك كثير اللي بدنا فيه.
سر في خط مستقيم على طول النهر حوالي نصف ميل . ستصل للمتنزه .	إمشي دغري على طول النهر حوالي نص ميل. بتصل المنتزه.	روح على خط مستقيم على طول النهر تقريبا نصف ميل. رح تروح للمعسكرات.
أسف أنني بحاجة إلى أن أطلع على أي مستند لتحديد الهوية .	أسف أني بحاجة إني أشوف اثبات هوية.	اسف اني بدي اشوف أي ورقة بقدر أخذ اسم.
كن حذراً ، السقف منخفض .	انتبه ، السقف واطي.	لازم لازم لازم لازم لازم لازم لازم لازم لازم لازم لازم لازم لازم ، الارض مرتفع.
كم تتقاضى لتطبيع صور الفيلم ؟	قديش بتوخذ عشان تطبع صور الفلم؟	قديش بتخذ لتتت لعاير صورة الفلم؟
هل يدخل هذا في حدود المعفي من الضرائب ؟	هاظ معفي من الضرايب؟	بدخل هاد حدود للتكلف؟
غرفة مفردة بدون دش من فضلك .	غرفة مفردة بدون دش لو سمحت .	غرفة وحدة بدون سكر لو سمحت.
هل يمكن أن تدلّني أين أجد القنصلية اليابانية ؟	ممكن تحكيلي وين بقدر ألاقي القنصلية اليابانية؟	بتقدر تحكيلي وين بلاقي السفارة اليابانية؟
من فضلك ضعها في قمع .	لو سمحت حطها ببوري.	لو سمحت حطها بجفف.
نصف أوقية من شانيل رقم خمسة من فضلك .	نص أوقية من شانيل رقم خمسة، لو سمحت.	نصف مية من شانيي رقم خمسة لو سمحت.
شخصان .	شخصين.	اثنين.
هل تعرف ما إذا كان هناك أي فنادق رخيصة الأسعار ؟	بتعرف اذا في أي فنادق رخيصة؟	بتعرف شو ما في فنادق رخيصة سعر؟
أريد أن أقدم طلباً للحصول على إصدار جديد .	بدي أقدم طلب مشان اخد إصدار جديد.	بدي أطلب طلب عشان أقص على مجلة جديد.
أريد بزة .	بدي سترة.	بدي ررر.
هذا مكلف نوعا ما .	هاي بتكلف شوي.	هاظ مش غالية.
لقد طلبت لحما لا سمكا . هل يمكنك تغيير هذا ؟	طلبت لحم مش سمك. ممكن تغير هاي؟	طلبت لحم لا سمك. بتقدر تغير هاي؟
عذراً . هل يوجد محل كتب قريب من هنا ؟	عفواً . في مكتبة بتبيع كتب قريب من هون ؟	اسف. في محل الكتب قريب من هون؟
حينئذ سنأخذها .	بهالوقت رح نوخذها.	هسا رح آخذها.
إنه بعيد جداً . يحسن بك أن تأخذ سيارة أجرة .	هو بعيد كتير. فضل أكيد تاخذ تكسي.	هو بعيد كثير. لازم تاخذ سيارة تاكسي.
في أي وقت نبدأ ؟	على أي ساعة راح نبلش؟	أي وقت رح نوصل؟
حسناً . لقد تم التأكيد . هل يمكننا أن نأخذ رقم تليفونك في حالة الحاجة إلى الاتصال بك ؟	ماشي، اتأكدت . بنقدر نوخذ رقمك تلفونك في حال احتجنا نتصل فيك؟	ماشي. بتتوقع. ما بتقدر آخذ رقم تلفونك اذا بدك اتصلك؟
حسنا . خصم خمسة في المائة . هل يوافقك لك ؟	ماشي ، خصم خمسة بالمية. بمشي معك؟	ماشي. خصم خمسة وعشرين. بوافقك؟
الآن ، مكالمتك ردت . تفضل من فضلك .	حاليا، مكالمتك رجعت. تفضل لو سمحت.	هسا ، هاظ ، هاظ ، كك بتحكي. تفضل لو سمحت.
أوه ، أهي كذلك ؟ كيف تفضلها ؟	أووه، هي هيك؟ كيف بتحبها؟	اه ، هيك؟ شلون بتحبها؟
أنا فقدت أثر بريد مسجّل .	ضيعت أثر رسالة مسجلة.	أنا ضيعت تاريخ بريد بالبريد بالبريد.
لا أشعر بحالة جيدة . هل ترشدني إلى طبيب ؟	ما بحس حالي ملبح. ممكن ادلني على دكتور؟	مش حاس حالة كويسة. بتقدر تجيبني على دكتور؟
هل أنت ملم بجغرافيا اليابان ؟	إنت ملم بتظاريس اليابان؟	إنت عارف على خريطة اليابان؟
لا أستطيع رؤية الشاشة جيداً من هنا ، هل يمكنني تبديل المقاعد لبعض الوقت ؟	أنا مش قادر أشوف الشاشة مليح من هون. ممكن نبدل المقاعد شوي؟	مش قادر اشوف الكاميرا كويس من هون. بقدر أغير الكراسي شوي؟
سعر الغرفة هو ستة آلاف ين في الليلة .	سعر الغرفة ست آلاف ين لليلة.	سعر الغرفة هو خمسة دولار ين بالليل.
أعتقد أن سيارتي تستحق حوالي خمسة آلاف دولارا .	أنا بتوقع سيارتي بتسوى حوالي خمس الآف دولار.	بتوقع اني السيارة بتوقع بتوقع تقريبا خمسين دولار.
أين حديقة الحيوان ؟	وين حديقة الحيوانات؟	وين الحديقة الحيوان؟
هي تريد بيرة .	هي بدها بيرا .	هي بدك بيرة.
هل هذه الحقيبة مناسبة لكل حالات الطقس ؟	هاي الشنتة بتناسب كل حالات الجو؟	هاي الشناتة مناسب كل كل الحالة؟
أفضل شيء هو اسطوانة مصغرة .	أحسن اشي هو سي دي صغير.	أحسن اشي هو اسطوانة صغيرة.
فهمت ، في هذه الحالة ليس علىّ أن أدفع أجر التبديلات ، أليس كذلك ؟	فهمت، بهاي الحالة ما عليي أدفع فلوس التبديلات، مش هيك؟	فهمت ، بقدر أدفع سعر البدلات، صح؟
هل يمكنك أن تريني حجماً أكبر بقليل ؟	ممكن توريني سايز اكبر شوي؟	بتقدر تجيبيني حجم أكبر شوي؟
هل يمكنك بطريقة ما أن تصف لي مرضك بالإنجليزية ؟	بتقدر بأي طريقة تشرحلي مرضك بالإنجليزي؟	بتقدر تحكيلي مرضك بإنجليزي؟
انتقلنا إلى هذا المنزل منذ عام .	رحلنا لهاظ البيت من سنة.	نزلنا على هاد المحل من شهر شهر.
معذرة ، هل يسعني أن أتوجه إليك بسؤال ؟	معلش، بقدر أوجهلك سؤال؟	معلش، بقدر أروح معك سؤال؟
هذا سعر مرتفع ، أليس كذلك ؟	هاظا سعره غالي، صح؟	هاظ سعر مرتفع ، صح؟
نعم ، ولكن تأكد أن تذكرتك معك .	ايوه، بس تأكد إنه تذكرتك معك.	اه، بس متأكد اني تذكرة معك.
ما رأيك في موضوع التحرش الجنسي في مكان العمل ؟	شو رأيك بالتحرشات الجنسية اللي بتصير بمكان الشغل؟	شو رأيك بسبب الإحراج الخاصة مكان الشغل؟
أريد تذكرتين ذهاب وعودة إلى أكسفورد .	بدي تذكرتين روحة رجعة على أكسفورد.	بدي تذكرتين ذهابا ذهابا على نيويورك.
هل ستذهب إلى المدرسة هنا ؟	رح تروح عالمدرسة هون؟	رح تروح على المدرسة هون؟
أود بعضاً من فيلم رقم ايه إس ايه لهذه الكاميرا ، من فضلك .	بدي فيلم رقم ايه إس ايه لهاي الكميرا، لو سمحت.	بدي شوية أفلام رقم ايه ايه ، لو سمحت.
أصبت بسحجة .	أني انشخطت.	حسيت بكولاتة.
أريد تسجيل أمتعتي .	بدي أسجل شنطي.	بدي أحجز اغراضي.
أريد أن أرى ذاك الذي في نافذة العرض ، من فضلك .	بدي أشوف هاذ الموجود بالواجهة، لو سمحت.	بدي أشوف هاد اللي بشباك العرض، لو سمحت.
ما هي المحتويات ؟	شو المكونات؟	شو الاشياء؟
لقد تعطلت سيارتي . من فضلك احضر لتأخذها .	سيارتي خربت. تعال خذها لو سمحت.	تعطلت سيارتي. لو سمحت جيبها.
ما النمط الذي في مخيلتك ؟	شو النمط اللي بخيالك؟	شو النمط اللي بتكك؟
كيف تسير الأمور ؟	كيف ماشية الأمور؟	كيف بتتمشى السوق؟
ألا تسأله أن يتصل بي ؟	بتقدر تحكيله يتصل فيّ؟	ليش تحكيلي نحكي معي؟
ما الغرض منها ؟	شو الهدف منها؟	شو الغرض؟
كيف يربي الآباء اليابانيون أولادهم ؟ هل هم صارمون مع أطفالهم ؟	كيف بيربو الآباء اليابانيين ولادهم؟ همة شديدين مع عيالهم؟	كيف بتشتغل الناس اليابانين من الأطفال؟ هو صاير صاير صاير مع الأطفال؟
هلا ضغطت على زر مصراع النافذة ؟	ممكن تكبس كبسة الشباك؟	ممكن تحط حط زر الباب؟
أيمكنني أن أذهب هناك بمترو الأنفاق ؟	بقدر أروح هناك بالمترو؟	بقدر أروح هناك بالمترو؟
دعنا نشاهد التلفزيون . فيها مباراة بيسبول .	خلينا نتفرج على التلفزيون. في مباراة بيسبول.	خلينا نشوف التلفزيون. فيها مباراة البول.
حسناً . خذ هذا الاتجاه . من فضلك ، سأوصلك إلى غرفتك .	ماشي، خذ هاي الطريقة. لو سمحت، رح أوصلك لغرفتك.	ماشي. خذ هاد الاتجاه ، لو سمحت. رح يوصلك على غرفتك.
أريد تمويج متقارب لشعري ، من فضلك .	بدي أعمل شعري كيرلي ، لو سمحت.	بدي أغطس طويل لشعري، لو سمحت.
نريد مائدة في الشرفة .	بدنا طاولة على البرندة.	بدنا طاولة عالشباك.
معدتي ثقيلة .	معدتي كبيرة.	بخشتي ثقيل.
أعد ذلك , من فضلك .	عيدها، لو سمحت.	ارجع هيك, لو سمحت.
سآخذ صورة لجاك دانيلز .	راح آخذ صورة لجاك دانيلز.	رح اخذ صورة للللل.
هل لديكم أطباق ذات سعرات حرارية منخفضة ؟ فأنا أتبع نظاما غذائياً حالياً .	عندكو وجبات قليلة الكالوريز ؟ أنا ماشية بدايت هالأيام.	عندكم اكل بسعر سعرة منخفضة؟ انا بستخدم دوا هسا.
ما هي الفوارق بين هذه الفنادق ؟	شو الفرق بين هاي الفنادق؟	شو سعر هاي الفندق؟
لم أقم بالحجز .	ما عملت حجز.	ما كنت حجز.
هل لديك أية فكة لعداد الانتظار ؟	عندك عملة للبارك ميتر؟	عندك صرفة للمسبوع ؟
أيهما تفضل , داكن أم فاتح ؟	شو بتحب أكثر, غامق أو فاتح؟	شو بتحب, لون لون ولا بيض؟
حسناً سيدي . وما الحلو الذي تريد أن تختم به الطعام ؟	طيب يا استاذي.. شو الحلو اللي بدك تختم فيه الأكل ؟	ماشي سيدي. شو حلو اللي بدك تختم فيه الأكل؟
إنني أسجل لخروجي من الفندق . هلا أرسلت خادماً إلى أعلى ؟	أني بعمل تشيك اوت. ممكن تودي عامل لفوق؟	أنا أسجل بطلعي من الفندق. بتقدر تبعث مكتب على فوق؟
كيف يمكنني الذهاب إلى ديزني لاند ؟	شلون بقدر أروح على ديزني لاند؟	كيف بقدر أروح على طوكيو لاند؟
الآن ، هذه اللوحة خاصة جداً . رسمها تسوروتارو كاتاأوكا . إنه معروف بأنه فنان عالمي .	هسا، هاي اللوحة كثير مميزة. رسمها تسوروتارو كاتاأوكا. معروف هاذ فنان عالمي.	هسا ، هاي اللوحة الخاصة كثير. ماجربت هاي اللوحة الخاصة. ماجربتك. زي زي زي زي زي زي زي زي زي زي زي زي زي زي زي زي زي زي زي زي زي زي زي زي زي زي زي زي زي زي زي زي زي زي زي زي زي زي زي زي زي زي زي زي زي زي زي زي زي زي زي زي زي زي زي زي زي زي زي زي زي زي زي زي زي زي زي زي زي زي زي زي زي زي زي زي زي زي زي زي زي زي زي زي زي زي زي زي زي زي زي زي زي زي هاي اللوحة. هاي اللوحة كثير. الرسم. الرسم
هذه المظلة يمكن استخدامها كعصا للسير .	هاي الشمسية بقدر استخدمها كعصاية.	هاي الجاكيت بتقدر تستعمل لأداة السير.
لأن الصيف في اليابان عادة ما يكون شديد الحرارة ، ولم يكن لدينا تكييف هواء قديماً .	لأنه الصيف باليابان عادة بكون حامي كثير، وما كان عندنا مكيف هوا زمان.	بس الصيف باليابان بتكون كثير كثير كثير كثير كثير كثير كثير كثير كثير كثير كثير كثير كثير كثير كثير.
الشيء نفسه لي ، من فضلك .	ونفس الشي إلي ، لو سمحت.	اشي نفسي ، لو سمحت.
يوم الصحة الرياضية هو يوم العاشر من أكتوبر وهو إجازة قومية الغرض منها تحسين صحة المواطنين .	يوم الصحة الرياضية بعشرة عشرة بكون عطلة وطنية عملوه عشان يرفعوا مستوى الصحة عند الناس.	يوم الخدمة الرياضة هو يوم تسعة من شهر ستة و العطلة الرسمية عشان زيادة صحيا الناس.
هل من الممكن أن تنظف المنضدة من فضلك ؟	ممكن تنظف الطاولة، لو سمحت؟	ممكن تغسل الطاولة لو سمحت؟
يوجد عصير أناناس وبرتقال وطماطم .	في عصير أناناس و برتقال و بندورة.	في عصير اناوووووكاس و برتقال.
أود الإقامة بهذه الغرفة ليلة واحدة أخرى .	بدي أظل بهاي الغرفة ليلة ثانية.	بدي أحجز هاي الغرفة ليلة ثانية.
ثمانية دولارات . وهنا تأتي واحدة حالا .	ثمن دولرات. وهون بتيجي وحدة هسا.	ستة دولارات. هون رح تروح وحدة هسا.
هذا حسن بالنسبة لي . في الواقع أحب أن أدخن .	هاذ تمام بالنسبة إلي . بصراحة أني بحب أدخن.	هاظ كويس مني. بتوقع اني أدخن.
المكان كان على كرسي في البهو .	المكان كان عكرسي باللوبي.	المكان كان على كرسي بالساحة.
أشعر بصداع خفيف .	حاس بصداع خفيف.	حاس وجع خفيف.
ألو ، اسمي أودا . عندي حجز الليلة ، لكن سوف أتأخر في القدوم . لهذا من فضلك اتركوا لي الحجز .	مرحبا، اسمي أودا. عندي حجز هالليلة، بس راح يتأخر وصولي. يرجـى خليكو الحجز لي.	عبالي ، اسمي يا ياو. عندي حجز الليلة، بس رح أتأخر اروح.
أين قسم السفر ؟	وين قسم السفر؟	وين قسم السفر؟
هل لديك أي صورة لبطاقة هوية ؟	عندك اي صورة للهوية؟	عندك صورة لبطاقات بطاقة ؟
هل لك أن تعطيني إشارة بالضوء عندما تكون فيها ؟	بتقدر تعطيني إشارة بالضو لما تكون فيها؟	بتقدر تعطيني إشارة بالضوء اذا بتكون فيه؟
أريد فحص هذه الحقائب المتجه إلى طوكيو , من فضلك .	بدي اتفقد هالشناتي اللي رايحة لطوكيو، لو سمحت.	بدي أفحص هاي الشناتي رايح على طوكيو, لو سمحت.
ثمة شئ خطأ في آلة التهوية هذه .	في اشي غلط بالمروحة هاذ.	في اشي غلط بالثلاجة هاي.
منذ هذا الصباح .	من الصبح.	من يوم الصبح.
من فضلك قس حجم حذائي .	لو سمحت قيس حجم كندرتي.	لو سمحت حط حجم الحذاء.
أوافق . إنه أحد الأماكن المفضلة لي .	موافق. هاذ واحد من احلا الاماكن عندي.	بظن. هو هو هو مكان اللي بيحبي.
لابد أن تكون هادئة .	لازم تكوني هادية.	لازم تكون باردة.
أريد مطفأة سجائر .	بدي منطفة سجاير.	بدي سجائر.
أود أن أتتناول طبقا مثل هذا .	بدي أوكل صحن زي هاظ.	بدي أشرب صحن زي هاد.
أين توجد أقرب مغسلة ؟	وين اقرب مغسلة؟	وين أقرب مغسلة؟
هل لي بجدول مواعيد ؟	أعطيني جدول المواعيد؟	ممكن جدول موعد؟
من فضلك اعطني هذه .	لو سمحت اعطيني هاي.	لو سمحت اعطيني هاي.
هل يمكن أن أذهب لمشاهدة المعالم أثناء رسو السفينة في الميناء ؟	بقدر أروح اشوف المناظر لما السفينة تكون راسية بالمينا؟	ممكن أروح أشوف معالم بعد لصعد القطار.
هل يوجد مكان يقبل تنظيف الملابس في أيام الآحاد ؟	في أي مكان بقبل طلبات الغسيل كل يوم أحد؟	في مكان بعرف تغسل الثياب بيوم السبت؟
هل توجد خدمة نقل بالحافلات إلى متحف فورد ؟	في خدمة باصات بتروح على متحف فورد؟	في خدمة نقل بالباص على متحف التاكسي؟
أنا من النرويج .	أني من النرويج.	أنا من اليابان.
عشرة طوابع من فضلك .	عشر طوابع لو سمحت.	عشرين طوابع لو سمحت.
هل يمكنك أن تجر سيارتي ؟	ممكن تجرب سيارتي؟	بتقدر تركب سيارتي؟
إنه سمك ثعبان مشوي مع مرقة خاصة فوق سلطانية من الأرز .	هاذ سمك الانقليس مع صلصة خاصة محطوطة فوق سلطانية الرز.	هاد سمك الفلفل مشي مع شوربةةة عالطاطة.
هل يمكنني إعادتها في مدينة مختلفة ؟	بقدر أرجعها بمدينة ثانية؟	بقدر ارجعها على المدينة ثانية؟
عندي الدواء الخاص بي .	عندي الدوا تاعي.	عندي دوا تاعي.
هل لديكم أفلام للصيف ؟	عندكو أفلام للصيف؟	عندكم أفلام لل الصيف؟
هل تريد أن تذهب للتسوق معي بعد الظهر ؟	بتحب تيجي معي نتسوق بعد الظهر؟	بدك تروح بتسوق معي بعد الظهر؟
نعم ، سيدي . كيف تريدني أن اقطعها ؟	أيوة ، يا سيدي . كيف بدك إني أقصها؟	اه ، سيدي. كيف بدك رح اوصلها؟
عندما أعود ثانية إلى اليابان ، سأكتب خطاباً . وإذا كان لديك وقت ، من فضلك أرسل لي خطاباً .	لما أرجع مرة ثانية لليابان، رح أكتب رسالة. وإذا كان عندك وقت، تكرم ابعثلي انا رسالة.	ما ارجع مرة ثانية لليابان ، رح أبعثلي رسالة.
فراولة ، من فضلك .	فراولة، لو سمحت.	لولات، لو سمحت.
هل تفضل ماسكات للشعر أصغر أم أكبر ؟	بتحبي القناع للشعر أصغر ولا أكبر؟	بتحب فرشاة للشعر صغير ولا أكبر؟
بالتأكيد . متى تود أن تلعب جولف ؟	طبعاً. أميت بدك تلعب جولف؟	أكيد. متى بدك تلعب جولف؟
من فضلك اجعل الجزء العلوي أطول قليلاً .	من فضلك خلي الجزء الفوقاني أطول شوي.	لو سمحت ، حط كل كل كلي طول شوي.
كم أوقية من العطر أستطيع الحصول عليه من غير رسوم ؟	كم وقية من العطر بقدر أوخذها بدون رسوم ؟	قديش مية من مية لصابون بقدر اخذها من ما رسوم؟
معذرة , قم بالضغط على مصراعي النافذة الخشبيين , من فضلك .	عفواً، نزل اباجور الشباك الخشب , لو سمحت.	عفوا, حط على مقاسي الشباك الشبكين, لو سمحت.
لدي ثلاث حقائب .	عندي ثلث شناتي.	عندي ثلاث شنتات.
هذا البيت يبدو مريحا للمعيشة فيه , أليس كذلك ؟	هاد البيت مبين كثير مريح العيشة فيه، مش هيك؟	هاد البيت حلو للأكل فيه, صح؟
أريد أن أغسل ملابسي في وقت لاحق اليوم .	بدي أغسل وعيتي بوقت ثاني اليوم.	بدي تغسل ملابسي بعد اليوم.
أرجو ذلك .	بتمنى هيك.	بتمنى هيك.
واحد لنيويورك ، من فضلك .	واحد لنيويورك، إذا سمحت.	واحد لنيويورك، لو سمحت.
لا ، إنها لا تشمل الضريبة ومصاريف الخدمة .	لا، هي ما بتشمل الضريبة ومصاريف الخدمة.	لا، ما بتكلف الضريبة و المصاريف الخدمة.
قم بها بطريقتك .	اعملها بطريقتك.	خلينيها بطريقتك.
كم تستغرق مشياً على الأقدام ؟	قديش بتوخذ وقت مشي عالجرين؟	قديش بدك مشي عالأرجل؟
هل يمكنني الحصول على برنامج ؟	بقدر آخذ برنامج؟	بقدر اخد برنامج؟
من فضلك سجل عنوان الاتصال بك هنا .	من فضلك اكتب عنوانك للتواصل معك هون.	لو سمحت اكتب العنوان معاك هون.
نعم ، يا سيد تاناكا هناك رسالتان لك .	أيوة، يا سيد تاناكا، في عندك رسالتين.	اه ، يا سيدي تانكا هناك رسالةين إلك.
هل لي في شيء من لحم الخنزير والبيض ؟	ممكن شوية من لحم الخنزير والبيض؟	ممكن تعطيني اشي من لحم الخنزير البيض؟
إذا حدث ذلك ، من فضلك أتصل بي .	اذا صار هيك ، لو سمحت رنلي .	لو سمحت ، صار هيك ، لو سمحت احكيلي.
أوه ، آسف لأني أزعجتك .	اووه، معذرة الك ازعجتك.	هاظ ، آسف اني يزعجنيك.
هل يمكن أن أقيس مقاس تسعة .	ممكن أقيس مقاس تسعة ؟	بقدر أقيس مقاس تسعة.
ملابسه دائماً موضة قديمة .	هدومه دايما موضة قديمة.	لابسها كثير موضة قديمة.
هلا حجزت لي تاكسي الساعة السادسة صباح غد , من فضلك ؟	ممكن تحجزلي تكسي الساعة ستة الصبح لبكرا ، لو سمحت؟	ممكن تحجزلي تاكسي الساعة تسعة بكرة بكرة, لو سمحت؟
إنه صحيح هنا .	هو صحيح هون.	هو صحيح هون.
هل يمكن أن تدخل معه فكة صغيرة ؟	بتقدر ادخل معه شوية فراطة؟	ممكن تفتح معك عصير صغيرة؟
أنا حقا آسف .	أني جد آسف.	أنا آسف.
لقد طلبت ذلك .	طلبت هاظ.	طلبت هيك.
ما تكلفة هذا في اليوم ؟	قديش تكلفته ليوم واحد؟	قديش تكلفة هاذ اليوم؟
لا توجد أية مشاكل .	ما في أي مشاكل.	ما في مشكلة.
أجل . سنصل في الثامنة حسب التوقيت المحلي .	أها. رح نوصل الساعة ثمنية بالتوقيت المحلي.	اه. رح نوصل الساعة تسعة من الساعة تسعة من الوقت الدولي.
هل لديك واحد أكبر ؟	عندك واحد أكبر؟	عندك واحد أكبر؟
أنا كينجي .	أني كينجي.	أنا بيجي.
إنه المبنى الثاني على يسار هذا المبني الأبيض .	البناية الثانية على يسار البناية البيضا.	هاد المبنى الثاني على اليمين هاظ المحل أبيض.
أعطني قطعة لحم الخنزير هذه ، ولكن ليس بسمك تلك .	أعطييني قطعة لحمة الخنزير هاي، بس ما تكون سميكة مثل هذيك.	اعطيني قطعة لحم الخنزير هاي ، بس مش لونك هاي.
لدي موعد آخر .	عندي موعد ثاني.	عندي موعد ثاني.
لدي غرفة جاهزة لك في جراند هويتل . هل تستطيع الذهاب إلى هناك ؟	عندي غرفة جاهزة إلك بالجراند هوتيل. بتقدر تروح لهناك؟	عندي غرفة جاهزة إلك بمونديال كيويل. بتقدر تروح هناك؟
أرني واحدة لإحدى الشابات .	وريني وحدة لوحدة من الصبايا.	فرجيني وحدة واحد واحد واحد واحد واحد واحد واحد من شاباات.
أود أن أحجز غرفة لهذه الليلة .	بدي أحجز غرفة لهاي الليلة.	بدي احجز غرفة لليوم الليلة.
لقد خلعت البنطلون .	شلحت البنطلون.	غسلت القماش.
إنها رائعة .	هاي روعة.	هي حلوة.
أهذه هي الحافلة التي توصل إلى وسط المدينة ؟	هاظ هو الباص اللي بوصل لوسط البلد؟	هاي الباص اللي يوصل على الوسط المدينة؟
أتظن ذلك ؟	بتظن هيك؟	بتقدر هيك؟
أود أن أرسله عن طريق البريد .	حاب أبعثه عن طريق البريد.	بدي ابعثها على طريق البريد.
أشكرك ثانية لأنك ذكرتني . هل يميل كثير من الناس أن ينسوا توقيع أسمائهم ؟	بشكرك مرة ثانية عشان ذكرتني. بروح كثير من الناس تنسى توقع ع أسمائهم ولا شو؟	شكرا مرة ثانية انك تذكرني. بحب اني احكيها؟
هلا أرسلت تاكسي إلى المدخل الرئيسي لـ ويستمانستر مول ؟	ممكن تودي تكسي للمدخل الرئيسي بويستمانستر مول؟	ممكن تبعثلي تاكسي على المدخل الرئيسي لل أل أييييككمول؟
هل لديكم أية جولة سياحية أخرى ؟	عندك أي رحلة ثانية؟	عندكم جولة سياحية ثانية؟
السيارة تصدر صاخبا غريبا .	السيارة بطلع صوت غريب وعالي.	السيارة بتتتت.
هذه سبعون دولار .	هاي سبعين دولار.	هاي خمسمية دولار.
أنا شديد الحساسية للقطط .	أني بتحسس كثير من البسس.	أنا كثير حساس من الحيوانات.
لا . قليلاً في الأمام . هناك ، نعم .	لا. شوي لقدام. هناك، إيوه.	لا. شوي بظهر ، أه.
ركن المدخنين ، من فضلك . وشباك بجوار النافذة ، من فضلك .	ركن الشيشانيين، إذا سمحت. وشباك جمب النافذة، إذا سمحت.	كرسي المدخنين، لو سمحت.
هل يكلفني دخول هذا المبنى أي أموال ؟	بدفع أي مصاري إذا فتت على هاي العمارة؟	بتكلفلي على هاد المبنى اي فلوس؟
سأكون هنا حتى التاسعة . يحدوني الأمل أن تتمكن من القبض على المجرم في أقرب وقت ممكن .	راح أظل هون للساعة تسعة. بتمنى إنكم تمسكوا المجرم بأسرع وقت.	رح أكون هون لحد تسعة. بتمنى بتقدر تلاقي العمل من مكان ممكن.
شكراً لك . من فضلك عاود مرة أخرى .	مشكور. يلا جرب مرة ثانية من فضلك.	شكرا الك. لو سمحت ارجع مرة ثانية.
فاتتني محطتي .	راح علي الموقف.	ضيعتني محطةي.
أين يمكنني أن أقيم أثناء الجولة ؟	وين ممكن أسكن خلال الرحلة؟	وين بقدر أحجز بعد الجولة؟
إنه لمن دواعي السرور أن أتحدث معك .	إنسريت بالحكي معك.	كثير كثير كثير حلو بحكي معك.
أي مقاس تريد ؟	شو السايز اللي بدك ياه؟	شو مقاس بدك؟
بالتأكيد ، هل تريد تسريحة متموجة دائما ؟	أكيد، بدك اياه كيرلي دايما؟	أكيد. بدك بنطلون لطاطة لطاطة مش ناعم؟
إلى اليسار ، من فضلك .	على اليسار، لو سمحت.	عاليمين، لو سمحت.
لقد أتلفت حقيبتي .	دمرت شنتتي.	تعطلت شنتتي.
البيتزا لذيذة . من صنعها ؟	هاي البيتزا زاكية. مين عملها؟	المكرونة حلوة. مين مصنوعها؟
أخشى أن أسأل ، لكن ماذا تعني ؟	بخاف اسأل، بس شو قصدك؟	خايف أحكي، بس شو بتعرف؟
لا ، من فضلك اجلس وانتظر . سأعود بعد قليل .	لا، لو سمحت اقعد واستنى. راح أرجعلك بعد شوي.	لا، لو سمحت اقعد اجلس، رح ارجع بعد شوي.
الكعب مرتفع جداً .	الكعب عالي كثير.	القميص مرتفع كثير.
كم سيستغرق إصدار التأشيرة لي ؟	قديش الفيزا بدها وقت عشان تطلع؟	قديش رح تاخذ تأشيرة؟
لقد تعطلت سيارتي .	خربت سيارتي .	تعطلت سيارتي.
كيف أثر الركود على الشركة ؟	شلون أثر الركود عالشركة ؟	كيف كان فقرة بشركة؟
توجد رحلات جوية على شركات جال وانا التي تقلع في الساعة العاشرة وخمسة وخمسين دقيقة . ولكن , للأسف كلتا الرحلتين محجوزتان .	في طيارات على شركات جال وانا اللي بتغادر الساعة عشرة وخمسة وخمسين دقيقة. بس، للأسف الطيارتين مفللات.	في رحلات جوية على شركة كيو انا اللي بتروح الساعة تسعة وثلاثين دقيقة. بس بس بس بس كل رحلة محجوزين.
هل هذا سيفسد ؟	هاذ رح يخرب؟	هاد رح تغسل؟
هل يمكنك أن تخبرني بقيمة هذه المكالمة ؟	بتقدر تحكيلي تكلفة هاي المكالمة؟	بتقدر تحكيلي كم تكلفة هاي مكالمة؟
من الأفضل أن تضبط المرآة العاكسة للرؤية الخلفية .	أحسن شي تزبط المراية الخلفية.	لازم تترصة شاشة للرقبة لرقبة اليمين.
كم أجرة التاكسي حتى هذا الفندق ؟	كم أجرة التكسي لعند الفندق؟	قديش سعر التاكسي لحتى هاد الفندق؟
أريد مزيلا لطلاء الأظافر .	بدي أسيتون للمناكير.	بدي عصير للجاف.
ما هي مكونات هذا الطبق ؟	شو مكونات هالصحن؟	شو أنواع هاي الوجبة؟
متى ينبغي أن آتي ؟	متى لازم آجي ؟	متى لازم أروح؟
هل يمكن أن تخبرني عن الأماكن الشيقة هنا ؟	ممكن تحكيلي عن الأماكن الحلوة هون؟	بتقدر تحكيلي كيف أماكن حلوة هون؟
حسنا ، اضغط تسعة وصفر واحد واحد ، ثم الكود الخاص بالبلد ورقم الهاتف .	طيب، إكبس تسعة وصفر واحد واحد، وبعدين الكود تبع البلد ورقم التلفون.	ماشي، اضغط تسعة و صفر واحد ، و صفر واحد ، بعدين الرقم الرقم الرقم الهاتف.
أعتقد أنك ارتكبت خطأً . الغرفة دفع ثمنها مسبقاً . معي إيصال .	بظن إنك غلطت. الغرفة حاسبت عنها قبل. معي وصل.	بتوقع إنك بتتصرف غلط. الغرفة أدفعها قبل بعد. معي رسالة.
هل يمكنك أن تتحرك بهذا الاتجاه ؟	بتقدر تمشي بهالجهة؟	بتقدر تروح هاد الاتجاه؟
سيغادر قطارك من الرصيف رقم ثمانية .	رح يطلع قطارك من السكة رقم ثمانية.	رح تروح قطارك من الشارع رقم تسعة.
أريد غرفة أخرى .	بدي غرفة ثانية.	بدي غرفة ثانية.
لماذا يحدث هذا ؟	ليش بصير هاذ ؟	ليش هيك هيك؟
ما الرقم الذي أطلب منه هنا ؟	شو الرقم اللي بطلب منه هون؟	شو الرقم اللي بدي اطلب فيه هون؟
هل يوجد مطعم أرخص قريب من هنا ؟	في مطعم رخيص قريب من هون؟	في مطعم أرخص قريب من هون؟
هل يوجد مطعماً يمكنك أن تزكيه بالقرب من هنا ؟	في مطعم بتنصح فيه قريب من هون؟	في مطعم بتقدر تنصحها قريب من هون؟
أوبرا ميتروبوليتان .	أوبرا المتروبوليتان.	الاوبرا للبولت.
أين المصعد ؟	وين الأصنصير؟	وين القطار؟
هل يمكنك أن ترني أشياء أخري ذات تصميمات مختلفة .	ممكن توريني شغلات ثانية بأشكال غير؟	بتقدر تشوفلي اشي ثانية من الوان جديدة.
ليس بمقدورك تغيير وظيفتك بسهولة .	ما بتقدر تغير شغلك ببساطة.	مش قادر تغير تشغلك بسرعة.
ماذا تسمون هذا بالإنجليزية ؟	شو بتسموه هاذ بالإنجليزي؟	شو زي زي هاي هاظ إنجليزي؟
سأصل في التاسع من مارس وأغادر في الرابع عشر .	راح أوصل بتسعة ثلاث وراح أروّح بأربعطعش.	رح أوصل شهر تسعة و ارجع ع ثلاثة و ارجع بعشرعش.
هل ستحدد موعداً للخروج معي ؟	بدك تحدد موعد لتطلع معي؟	بتتوقع موعد بطلع معي؟
لم اسمع بهذا العنوان من قبل بالقرب من هنا .	ما سمعت بهاذ المكان قبل هيك بالمنطقة هون .	ما سمعت هاد العنوان من هون.
سوف أحضر لك العرض الأسبوع القادم .	بدي اجهزلك العرض الاسبوع الجاي.	رح أجيبلك العرض الاسبوع الجاي.
صديقي مريض جداً . هل تستطيع أن تطلب دكتور ، من فضلك ؟	صاحبي كثير مريض. ممكن تطلب الدكتور، لو سمحت؟	صاحبي مريض كثير. بتقدر تطلب دكتور، لو سمحت؟
هل أخذت تذكرة الحافلة ؟	اخذت تذكرة الباص؟	اخذت تذكرة الباص؟
يوجد لدى حوالي ألفي وخمسمائة دولار بالين الياباني .	أنا معي حوالي ألفين وخمسميت دولر بالين الياباني.	في عندي حوالي ألفين و خمسين دولار للين الياباني.
هل يمكنني استئجار مرشداً يتحدث اللغة اليابانية ؟	ممكن أستأجر دليل بسولف ياباني؟	بقدر استأجر مرشد بحكي ياباني؟
هذا بعينه ما كنت أبحث عنه .	هاي بالزبط اللي كنت بدور عليه.	هاد هو بالعكس اللي كنت بدور فيه.
رقم مقعدي دي اثنا عشر . أين هو ؟	رقم كرسيي دي اثنعش. وين هو؟	رقم مقعدي ل عشر. وين هو؟
فينس وليندا يريدان أن يبقيا بمفرديهما ، لذا أخشى أنني لا بد أن أبقى هنا هذه الليلة .	فينس وليندا بدهم يظلوا لحالهم، فبخاف انو لازم اظل هون الليلة.	هوووووو أنا بدنا خلينا لوحدي ، بس خايف اني رح اظل هون الليلة.
إنها تبعد حوالي تسعة وتسعون ميلا .	هي بتبعد حوالي تسعة وتسعين ميل.	هي بعيد تقريبا تسعة وتسعين.
حسناً ، تم إعادة التأكيد على حجزك .	ماشي، اتأكدنا من حجزك مرة ثانية.	ماشي، بتتعود على حجزك.
حسناً ، فلنق نظرة عليك .	طيب ، خلينا نطل عليك .	ماشي، يلا نشوفك.
هل يجب على أن أجيب بـ نعم أو بـ لا ؟	لازم اجاوب بـ اه أو بـ لأ ؟	لازم أجيب ب اه و لا؟
من فضلك ، بدلي شيك المسافرين إلي نقود .	لو سمحت اصرفلي هاد الشك السياحي كاش.	لو سمحت ، بدلي شيك السفر من مصاري.
من فضلك دلني على أرخص وسيلة للذهاب إلى سان فرانسيسكو .	من فضلك دلني على أرخص طريقة حتى أروح على سان فرانسيسكو.	لو سمحت أعطيني على أرخص وسيلة اروح على سان فرانسيسكو.
أريد غرفة مفردة بحمام لقاء ثمانين دولارا ، من فضلك .	بدي غرفة فردية مع حمام بـثمانين دولار, لو سمحت.	بدي غرفة وحدة مع حمام مع خمسين دولار، لو سمحت.
من فضلك ، هل رسمت لي خريطة بسيطة من هنا ؟	من فضلك، بتقدر ترسملي خريطة سهلة من هون؟	لو سمحت، رسمتلي خريطة صغيرة من هون؟
ليس لدي أية مضارب أو أحذية .	ما عندي لا مظارب ولا أحذية.	ما عندي كقشرة و جاكيت.
أوه ، يبدو أنني افقد شيء ما كل وقت أسافر فيه .	أوه، شكلني بضيع اشي كل مرة بسافر فيها.	هاظ ، شكله اني رح افقد اشي كل وقت أسافر فيه.
أجل ، إنها مفتوحة من التاسعة حتى التاسعة .	أها ، هي فاتحة من الساعة تسعة للساعة تسعة.	اه ، هي مفتوحة من التسعة لحد تسعة.
سيأتي القطار السريع التالي بعد ساعة .	راح يجي القطار السريع الجاي بعد ساعة.	رح يجي القطار السريع الجاي بعد ساعة.
مرحبا . كيف حالك ؟	مرحبا . كيف حالك؟	مرحبا. كيفك؟
تاريخ الانتهاء تسعة عشر من مارس تسعة وتسعين .	تاريخ انتهاء الصلاحية تسعطعش من شهر ثلاث التسعة وتسعين.	تاريخ خلصت تسعة وعشرين من شهر تسعة وتسعين.
هلا احتفظت بهذا لي ؟	ممكن تظبلي هاد؟	ممكن تخليلي هاد؟
هل تقبل بالين الياباني ؟	بتوخذ بالين ياباني؟	بتتقبل للين الياباني؟
من فضلك ، اكتب رقم الغرفة في الخلف .	من فضلك ، اكتب رقم الغرفة بقفى الورقة.	لو سمحت، اكتب رقم الغرفة ع اليمين.
هل يمكنك أن تصلح ذلك ؟	بتقدر تصلح هاي؟	بتقدر تصلح هيك؟
سيداتي سادتي ، لدينا على متن رحلتنا اليوم مضيفين يتحدثون اليابانية يمكن التعرف عليهم من خلال الشارة التي يلبسونه . إذا كنت تعرف أي شخص يريد مساعدة في الترجمة ، من فضلك دعنا نعرف .	سيداتي وسادتي،برحلتنا اليوم، عنا مضيفين بحكوا ياباني بتعرفوهم من الباجة اللي لابسينها. إذا بتعرف إنه أي حد بحتاج مساعدة بالترجمة، لو سمحت خلينا نعرف.	يا ياي ، عنا من الرحلة اليوم للرحلة اليوم للرحلة ، عنا من من من منوووو ، لو سمحت ، لو سمحت ، لو سمحت ، لو سمحت ، لو سمحت ، لو سمحت. لو سمحت بتعرفها على زي زي هاظ ل ل ل ل ل ل ل ل ل ل لل ل ل لل ل لل ل لل ل لل ل لي يييييي ليي
هل يجب أن أدفع الرسم الإضافي عندما أدخل مبنى ؟	لازم أدفع رسوم ثانية بس أفوت عأي مبنى؟	لازم أدفع رسوم زيادة لما أروح مبنى؟
لقد انكسرت السنة .	انكسرت السنة.	كسرت السنة.
تبدو البونساي كهواية شخص هرم .	شكلها البونساي هواية الختيار.	شكله السيسي.
لدينا غرفة مزدوجة بحمام بخمسة و ثمانين دولار .	عنا غرفة مزوجة مع حمام بخمسة وثمنين دولار.	عنا غرفة مزدوجة بحمام خمسة و خمسين دولار.
هل هذه من نوع ليفي خمسة صفر المعتمدة ؟	هاي من نوع ليفي خمسة صفر الأصلية؟	هاي نوع كيو خمسة صفر الصح؟
هل يمكن أن أبيت عندكم الليلة ؟	بقدر أبات عندكو الليلة؟	ممكن أحكي عندكم الليلة؟
هل تود منضدة في المطعم الرئيسي أو في غرفة خاصة يا سيدي ؟	سيدي، بتحب طاولة بالمطعم الرئيسي ولا بغرفة خاصة؟	بدك طاولة بالفندق الرئيسي و غرفة خاص يا سيدي؟
مائة بالمائة قطن .	مية بالمية قطن .	مئة وتسعين قطن.
إنها لذيذة جداً .	كثير طيبة.	هي حلوة كثير.
هل أستطيع التحدث مع المدير ؟	بقدر أحكي مع المدير؟	بقدر احكي مع المدير؟
أنا آسف ، هو ليس بالداخل الآن .	أني آسف، هو مش جوا هسا.	أنا آسف ، هو مش برا هسا.
أريد غرفة بسريرين . ما ثمن الغرفة في الليلة ؟	بدي غرفة بتختين. قديش تكلفة الغرفة بالليل؟	بدي غرفة بسريرين. قديش سعر الغرفة الليلة؟
ابقى على الخط وانتظر لحظة من فضلك .	خليك على الخط و استنى شوي من فضلك.	خليني ع الخط و شوف لحظة لو سمحت.
هل يمكنني أن أرسل أي ميل واحد فقط قيمته دولار .	بقدر أبعث أي ميل واحد تكلفته بس دولر؟	بقدر ابعث اي ميل واحد بس سعرها دولار.
من أين تغادر الحافلات لمشاهدة المعالم ؟	من وين بتطلع الباصات حتى نشوف المناظر؟	من وين بتروح الباصات لحتى تشوف المعالم؟
هل لديك ألوان أخرى من هذا ؟	عندك ألوان ثانية من هاذ؟	عندك لون ثانية من هاد؟
اذهب إلى نادي رياضي كل يومين .	روح عالجيم كل يومين.	أروح على مكتب رياضة كل يوم.
تم الفصل بين مقاعدنا .	صار فصل بين كراسينا.	بتفصل على مقعدنا.
هل لك أن تخبرني عن مكان تحليق الطائرة الآن ؟	بتقدر تحكيلي وين بطير الطيارة هسا؟	بتقدر تحكيلي وين مكان الطيارة هسا؟
كيف ترغب في إجراء المكالمة ؟	شلون بدك تعمل المكالمة؟	كيف بدك أعمل مكالمة؟
أفهم ذلك . أحاول استئجار سيارة سيتروين .	بفهم هالاشي. بحاول أستأجر سيارة سيتروين.	فاهم هيك. بدي استأجر سيارة سيتيين.
هذه هي الغرفة اثنا عشر صفر سبعة .	هاي هي الغرفة اثنعش صفر سبعة.	هاي الغرفة ثلاثعش صفر سبعة.
هل لك أن تأخذ هذا ، من فضلك ؟	ممكن توخذ هاذ، لو سمحت؟	ممكن تاخذ هاد، لو سمحت؟
كم عمر هذا الصبي ؟	قديش عمر هالولد؟	قديش عمر هاد الصبي؟
قارب مع مرشد ، من فضلك .	قارب مع مرشد ، لو سمحت.	قطار مع مرشد، لو سمحت.
القهوة غير محسوبة .	القهوة مش محسوبة؟	قهوة مش صحيحة.
لقد أضعت تذكرة الطيران الخاصة بي .	انا ضايع تذكرة الطيران حقتي.	ضيعت تذكرة الطيران تاعي.
نعم , في بادئ الأمر ، اغسليها على منفصلة .	أيوة, بالأول, غسليها لحالها.	اه, بس بس ، اغسلها عال منفصلة.
هل يمكنني أن التقط بعض الصور ؟	ممكن اوخذ شوية صور؟	بقدر أشوف شوية صورة؟
هلا فتحت هذه الحقيبة ، من فضلك ؟ ماذا يوجد هنا .	بتقدر تفتح هاي الشنطة، لو سمحت؟ شو لقيت فيها هون؟	ممكن تفتح هاي الشناتي، لو سمحت؟ شو فيه هون.
ما نوع هذه الموسيقى ؟	شو نوع هاي الموسيقى؟	شو نوع هاي موسيقى؟
أريد بعض الكريم للأيدي .	بدي شوية كريم للإيد.	بدي شوية عصير للأرجل.
مائة غير المدخنين من فضلك .	مية غير اللي بدخنوا، لو سمحت.	خمسين مش المدخنين لو سمحت.
من فضلك أعطني بعض الفكة .	لو سمحت اعطيني شوية فراطة.	لو سمحت اعطيني شوية كة.
بالتأكيد . لدينا بعض الماركات الأمريكية الأصلية الجميلة . للكتب .	أكيد. عنا شوية ماركات أمريكية أصلية حلوة. للكتب.	أكيد. عنا المنتجعات اليابانية الشهيرة. الكتب.
لدي وصولها ، سوف ندفع ثمن شحنها إلى عنوان منزلك .	لما توصل. راح ندفع حق الشحن لعنوان بيتك.	عندي وصول ، رح أدفع سعر شحنها على العنوانك.
إنها مشغولة .	هيه مشغولة.	هي مشغول.
سرقت حقيبتي في الشارع .	انسرقت شنتي بالشارع.	ضاعت شنتتي بالشارع.
لم تصنع هذه باليابان ، أليس كذلك ؟	ما صنعت هاي باليابان، صح؟	ما بتعمل هاي باليابان، صح؟
سيبدأ الصعود على متن الطائرة الساعة الرابعة والنصف لذلك من فضلكم كونوا هناك قبل هذا الموعد .	رح يبلش الصعود على الطيارة الساعة أربعة ونص . لذالك لو سمحتو كونو هون قبل هذا الوقت.	رح تصعد ع الطيارة الساعة أربعة ونص. لو سمحت.
نحن هنا لمدة يوم .	إحنا هون لمدة يوم.	احنا هون لمدة يوم.
لقد فقدت شيكاتي السياحية .	ضيعت الشيكات السياحية تبعتي.	ضيعت شيكاتي السياحي.
ما أنواع الخضراوات الموجودة لديك ؟	شو هي الخضرة اللي عندك؟	شو نوع الفاكهة عندك؟
يجب أن أنتقل إلى عربة مكيفة واحد صفر صفر . هل هذا ممكن ؟	بدي انتقل لعرباية مكيفة واحد صفر صفر. ممكن؟	لازم أروح على سيارة مكيفات واحد صفر صفر. ممكن؟
نعم ، حجز لمدة ستة أيام من فضلك ، بدء من الثالث والعشرين من يوليو .	ايوه، حجز لست أيام لو سمحت، ببلش من ثلاث وعشرين ستة.	اه ، حجز لمدة خمس أيام لو سمحت. أول أول من ثلاث وعشرين شهر شهر شهر خمسة.
من أي مكان يمكنني أن أغير القطار الذي يوصلني إلى إدنبره ؟	منين بقدر أغير القطار اللي بوصلني لادنبرة؟	من أي مكان بقدر أغير القطار اللي يوصلني ع لوسرر؟
أكثر منتجاتنا بيعت عبر السنوات الأربع الماضية هي الآلة الناسخة طراز أ . أكس أربعة خمسة صفر .	أغلب اللي بعناه من منتجاتنا على مرّ الأربع سنين اللي فاتت هي الآلة الناسخة، طراز أ . أكس أربعة خمسة صفر.	أكثر المنتجات اللي اشتريت من السنين ثلاث الماضية هي الحمامة زي الماركة طراز. سي خمسة صفر.
آسف سأعود لاحقاً .	آسف. راح أرجع بعدين.	آسف رح ارجع بعدين.
هل يتحتم عليك كثيراً أن تعمل حتى ساعة متأخرة ؟	بتظطر كثير تشتغل لوقت متأخر؟	لازم تعمل لحتى ساعة متأخرة؟
هل لديك نفس هذا التصميم بكعب أعلى ؟	عندك نفس هاذ الديزاين بس كعب أعلى؟	عندك نفس هاد النموذج بخيط فوق؟
التكلفة ، من فضلك . هل تقبلون بطاقة فيزا ؟	الحساب ، لو سمحت. يتقبلو بطاقة فيزا؟	تكلفة ، لو سمحت. بتقدر تشتريلي بطاقة فيزا؟
من فضلك استلق هنا .	لو سمحت، اتمدد هون.	لو سمحت رق هون.
اسمي ميتشكو تاناكا ، ورقم الرحلة إلى طوكيو هو خمسة ، صفر ، واحد .	اسمي ميتشكو تاناكا، ورقم الرحلة لطوكيو هو خمسة، صفر، واحد.	اسمي هو هو هو هو خمسة ، رقم الرحلة على طوكيو هو خمسة ، صفر ، واحد.
آه ، كلا . من فضلك أسرع . إننا متأخرون .	آه، لأ. لو سمحت عجل، إحنا متأخرين.	اه، لا، لا، لو سمحت أسرع. احنا متأخرة.
ما هي أفضل جولة حتى أرى أشهر الأماكن ؟	شو هي أحسن رحلة عشان أشوف أشهر الأماكن؟	شو أحسن جولة لحتى اشوف أحسن الأماكن؟
حسنا . مقعدان من فضلك .	ماشي. كرسيين لو سمحت.	ماشي. كرسيين لو سمحت.
أظن أنه بديع المنظر .	بظن انه منظره صاير حلو.	بتوقع انه حلو حلو.
بنطلون أخر ؟	بنطلون ثاني؟	قميص ثاني؟
سأجرب بعضاً من الشراب المثلج .	بدي أجرب شوي من العصير المثلج.	رح اجرب شوية العصير.
هل هذا هو الطريق الصحيح إلى المحطة المركزية ؟	هاد الطريق الصح للمحطة الرئيسية؟	هاد هو الطريق الصحيح للمحطة العاصمة؟
أريد شراء تذكارات لأصدقائي . أيمكن أن تُوصي ببعض منها ؟	بدي أشتري هدايا تذكارية لأصحابي. ممكن تنصحني بإشي؟	بدي اشتري تذكار تذكار للسيدي. بتقدر تنصح شوية شوي؟
أريد الحصول على تأمين .	بدي تأمين.	بدي أحجز.
آوه إلقاء نظرة على صندوقك .	واو أنا حاب أشوف صندوقك.	هاظ اخذ أخذ صندوقك.
إنها أربعة عشرة .	هاي أربعطعش.	هي أربعة وعشرين.
سأنتظر حتى يتاح الجلوس في التراس .	رح أستنا لحتى يصير الجلوس بالتراس ممكن.	رح اقعد عtray.
يمكنك أن تمكث في منزلي .	ممكن تفضل تقعد ببيتي.	بتقدر تقعد ببيتي.
هذا , من فضلك .	هاظ ، لو سمحت.	هاظ, لو سمحت.
من فضلك نظف هذا المعطف .	لو سمحت نظف هاظا الكبوت.	لو سمحت نظف هاي البلنج.
شراب الشمام كحلاء ، من فضلك .	عصير الشمام كحلو ، لو سمحت.	عصير التوت ، لو سمحت.
أخطط لتعلم الجولف .	بفكر أتعلم جولف.	بدي أعمل تدريب الجولف.
كان هذا مكسوراً بالفعل عندما فتحت الطرد .	كان هاذ مكسور فعلاً لما فتحت الطرد.	كان هاد مكسور كثير لما تفتح الطرد.
توقفت ساعتي .	ساعتي وقفت.	تعطلت ساعتي.
أجل . إنها مشكلة تخلص من الفضلات .	أيوة. هاي مشكلة كب الزبالة.	اه. هاي مشكلة بتخذ من الأكلة.
هناك محل لبيع الزهور في الطريق .	في محل ورد بالطريق .	في محل لبيع الجلدة بالطريق.
هل السيدات يقبلن هذا ؟	الستات بقبلن بهاذ؟	لوز بتقبل هاد؟
هل يمكننا ترك أشياءنا ما عدا الأشياء القيمة في الحافلة ؟	بنقدر نخلي اغراضنا هون، ماعيدا الأشياء الغالية، في الباص؟	ممكن نروح الأشياء اللي اللي اللي الغالية بالباص؟
بمقدورك أن ترى واحداً عند " كارينجي هول " .	بامكانك تشوف واحد بقاعة كارنيجي.	بتقدر تشوف واحد عند " سوزي هول.
آسف جدا ، لكني أود تأجيل الميعاد .	آسف كثير، بس بدي أجل الموعد .	آسف كثير ، بس بدي أحجز موعد.
أجل , يمكننا القيام بخدمتك بداية من السابعة .	اها، منقدر نخدمك من الساعة السابعة.	اه, بقدر تعمل العملتك أول من سبعة.
على أي جانب من ميدان الاتحاد هي ؟	على اي جهة من دوار الاتحاد بتكون؟	شو طرف الشارع اللي هو هو؟
أريد بعضاً من كريم التنظيف .	بدي شوية كريم تنظيف.	بدي شوية عصير.
من فضلك لفها كل على حدة .	من فضلك غلفها كل وحدة لحالها .	لو سمحت لسعها كل كل كل وحده.
كود المنطقة هو ثلاثة . ورقم الهاتف هو اثنان ثلاثة أربعة ثلاثة أربعة صفر صفر .	رقم المنطقة ثلاثة. ورقم التلفون اثنين ثلاثة أربعة ثلاثة اربعة صفر صفر.	كود المنطقة هو ثلاث. رقم التلفون هو اثنين ثلاث ثلاثة ثلاثة صفر صفر.
كم عدد المرات التي سأغير فيها القطارات للوصول إلى هناك ؟	كم قطار رح اركب عشان أوصل هناك؟	قديش رح أغير فيه القطار لحتى اوصل هناك؟
هل تريد تسوية الفاتورة الآن ؟	راح تحاسب عالفاتورة هسا؟	بدك تسوي الفاتورة هسا؟
هل هذه السيارة الأجرة متاحة ؟	هاي التكسي فاضية؟	هاي السيارة السيارات اللي موجودة؟
هل يمكن أن تدلني على بعض الفنادق الرخيصة والنظيفة ؟	بصير ادلني عبعض الفنادق الرخيصة والنظيفة؟	بتقدر تحكيلي على فنادق الرخيصة و الجيدة؟
أنا مع بعض الأصدقاء .	أنا مع شوية صحاب.	أنا مع شوية صديق.
لشخصين عند الساعة السابعة , الاسم وتاناب .	لشخصين الساعة سبعة. الاسم وتاناب.	واحد من الساعة سبعة, اسمي وووووووووووووووووووووووووووووووووووووووووووووووووووووووووووووووووووووووووووووووووووووووووووووووووووووووووو واحد عند الساعة سبعة, اسمي و, اسمي وا
ما هو الإجمالي ؟	شو الإجمالي؟	شو بالضبط؟
أين يمكنني أن أشتري زلاجات وأحذية ؟	من وين بقدر اشتري زلاجات و أحذية؟	وين بقدر اشتري صابون و جاكيت؟
ما وجه الاختلاف بين منتجك ومنتج منافسيك ؟	شو الفرق بين منتجك ومنتج الناس اللي بتنافسك؟	شو شكل اختلاف عن منتجك بشتغلك بشتغل من من الأكل المحلك؟
أين تعلم السيد جونز اللغة اليابانية ؟	وين السيد جونز تعلّم اللغة اليابانية؟	وين بتعرف السيد جونز ياباني؟
لا يمكنني وضع الأمتعة تحت المقعد . هل لك أن تحتفظ بها لأجلي من فضلك ؟	أنا ما بقدر أحط شنطي تحت المقعد. ممكن تخبيلي ياهم لو سمحت؟	ما بقدر احط أغراض الكرسي. بتقدر تحتفظها عشاني لو سمحت؟
هل يمكنك أن تستدعي موظفاً يتحدث اليابانية ؟	ممكن تنادي موظف بحكي بالياباني؟	بتقدر تجيبلي مكتب بحكي ياباني؟
سوف أبلغ الشرطة بذلك .	راح أبلغ الشرطة بهاظ الإشي.	رح أحكي الشرطة.
عيد ميلادك اقترب .	عيد ميلادك قرب.	عيدتك قريب.
تعثر صديقي والتوي كاحله .	صاحبي وقع والتوى كاحله.	ضيعت صاحبي اللي لقرنه.
نعم , أعتقد ذلك .	اه، بتوقع هيك.	اه, بتوقع هيك.
اتجاه واحد .	اتجاه واحد.	طريق واحد.
هلاّ جعلت توقيعك هنا والحروف الأولى من اسمك هنا .	هات خلي توقيعك هون وأول حروف اسمك هون.	ممكن تضلك هون و احرف الثانية من اسمك هون.
أين يمكن أن أوقف سيارتي ؟	وين ممكن أقف سيارتي؟	وين بقدر أحجز سيارتي؟
سأغلق الآن . شكراً على انتباهكم .	رح أسكر هسا. شكراً على انتباهكو.	رح أفتح هسا. شكرا كتير. شكرا.
اللعنة . اللعنة . اللعنة . اللعنة . لقد كبرت معتاداً على وجهها .	يلعن. يلعن. يلعن. يلعن. أنا تعودت كثيرعلى وجهها.	هاظ. هاظ. هاظ. زاكي. هاظ. زاكيهاظ. هاظ. زاكيهاظ. هاظ. زاكيهاظ.. زاكيهاظ.. هاظ. هاظ. زاكيهاظ.. هاظ. هاظ. هاظ. هاظ. هاظ. هاظ. هاظ.......
سنراك في الغد .	رح نشوفك بكرة.	رح تشوفك بكرا.
عندي ثلاثة أطفال .	عندي ثلاث ولاد.	عندي ثلاث اطفال.
نعم ، هي ، لأنك تستطيع أن ترى العلم أمام مكتب البريد .	صح، هي . لأنه بتقدر تشوف العلم قدام مكتب البريد.	اه ، هي ، بتقدر تشوف العلم قدام مكتب البريد.
هل تستطيع إنزال أمتعي إلى الردهة غداً صباحاً ؟	ممكن تنزل أغراضي على الردهة بكرة الصبح؟	بتقدر تحط اغراضي للتراسة بكرة الصبح؟
أربع ليالي .	أربع ليالي.	ثلاث ليالي.
دقيقة فقط ، من فضلك .	ديقة بس، لو سمحت.	دقيقة بس ، لو سمحت.
هل ستواجهني أية صعوبات في الجمارك ؟	راح ألاقي أي صعوبة بالتعامل مع الجمارك؟	رح تصيري مشكلة بالالجمارك؟
هلا أخبرتني كيفية تعديلها من فضلك ؟	ممكن تحكيلي كيف اعدلها لو سمحت؟	ممكن تحكيلي كيف تغيرها لو سمحت؟
حسنا ، لا أعلم بعد لكنني سوف أحاول بالتأكيد .	ماشي، مش عارف لحد الآن بس رح أحاول أكيد.	ماشي، ما بعرف بس بس بس رح أعمل أكيد.
موعده المقرر هو الثامنة والنصف مساءْ بالتوقيت المحلي .	موعده هو الساعة ثمنية ونص المسا بالتوقيت المحلي.	موعد موعد موعد موعد موعد موعد موعد موعد موعد موعد موعده الساعة تسعة وعشرين المسا.
هل يمكن أن تضع حقيبة السفر هذه في صندوق السيارة .	ممكن لو سمحت تحطلي شنة السفر هاي بالطبون ؟	بتقدر تحط شنتاتي السفر هاي على صندوق السيارة.
هذه ليست تفاحة ولكنها خوخة .	هاي مش تفاحة هاي خوخة.	هاي مش تفاح بس برتقالة.
إذا كان بالإمكان ، لم أكن لأخلع السنّة .	اذا ممكن، أنا بفضل ما تقلع السن.	لو سمحت، ما ما بقدر أمسح السنة.
علي أن أفحص ذلك مع زوجتي .	لازم أشوف الموضوع مع مرتي.	لازم أفحص هاد معي زوجتي.
لا أعتقد أن هذه السكينة نظيفة . أيمكنك أن تُحضر لي واحدة أخرى ؟	أنا ما بظن إنه هاي السكينة نظيفة. بتقدر تجبلي وحدة تانية؟	ما بتوقع هاي البطارية باردة. بتقدر تجيبلي وحدة ثانية؟
املأ البنود الآتية في بطاقة التسجيل .	املي البنود اللي جاية على كرت التسجيل.	وجبت هذه الاشياء اللي ببطاقة التسجيل.
ما الذي يمكن أن أراه في هذه الجولة ؟	شو بقدر أشوف بهاي الرحلة؟	شو ممكن اشوف هاي الجولة؟
هل هذا المتبل حار ؟	هاظ المتبل حار؟	هاد هظ كظ حار؟
هذه كلها مطبوعات .	هاي كلها مطبوعات.	هاي كلهامجلات.
هذه هديه لصديق .	هاي هدية لرفيقي.	هاي هدية بصديق.
أراهن بخمسة دولارات .	براهن بخمس دولارات .	شوفني خمس دولارات.
هل توجد أية جولة صباحية ؟	في أي جولات صباحية؟	في جولة الصبح؟
سنمكث .	راح نظل.	رح أقعد.
هل توجد غرفة استراحة عامة بالقرب من هنا ؟	في غرفة استراحة عامة جنبنا هون؟	في غرفة استراحة قريبة من هون؟
آسف ، لقد تحققت من إدارة الخدمة وإدارة المفقودات ولم أجدها عندهم .	بعتذر، تأكدت من إدارة الخدمة وإدارة المقودات وما لقيتها عندهم.	آسف ، تأكدت من شركة الخدمة بصلح على الخدمة و الشؤون المدرات ما بلاقيها فيه.
هل قلت لي كيف أذهب إلى المتحف ؟	قلتلي كيف بروح على المتحف؟	بتقدر تحكيلي كيف أروح على المتحف؟
لا أريد إنفاق أكثر من عشرين دولاراً .	ما بدي أصرف أكثر من عشرين دولار.	ما بدي أدفع أكثر من عشرين دولار.
هذا المكان مكتظ بالناسب ، أليس كذلك ؟	هاظ المكان معبى ناس، مش هيك؟	هاد المكان كثير الناسة، صح؟
سأحضر المدرسة الصيفية بجامعة هاواي .	رح أداوم بالمدرسة الصيفية بجامعة هاواي.	رح أجيب المدرسة الصيفية لجامعة هاواي.
من فضلك اعطني تصريحاً سارياً لمدة أسبوع .	لو سمحت أعطيني اذن لمدة أسبوع.	لو سمحت أعطيني جواز لسبوع.
ما هذا من فضلك ؟	شو هاظ لو سمحت؟	شو هاذ لو سمحت؟
سأحتاج إلى بطاقة ائتمان .	راح أحتاج الفيزا .	بدي بطاقة ل الائتمان.
إذن دعنا نبطنها من الداخل .	معناته خلينا نحشيها من جوا.	لو سمحت لغسلها من جوا.
هل هذه محطة قطار سريع ؟	هاي محطة اكسبريس؟	هاي محطة القطار سريع؟
من ثمانية إلى اثنى عشر من فضلك .	من ثمانية ل اثنعش لو سمحت.	من ستة و ثنينعش لو سمحت.
أود قياس بذلة السباق الخاصة بي .	بدي اقيس بدلة السباق تبعتي.	بدي مقياس جرة الحماق تاعي.
لقد طلبته منذ وقت طويل .	طلبته من زمان.	طلبتها من وقت كثير.
أين الحمام ؟	وين الحمام؟	وين الحمام؟
اليابانيون لا يأخذون إجازات طويلة .	اليبانيين ما بيوخذو عطل طويلة.	الياباني ما ما أخذ إجازة طويل.
هاهي .	هيها .	هاي هاي.
أنها مناسبة تماما .	زابطة تماما.	هي مناسب كثير.
مرحبا . هذه هي الخطوط الجوية المتحدة .	مرحبا . هاي هي الخطوط الجوية المتحدة .	مرحبا. هاي هي الخطوط جوية المتحدة.
أعيش في شقة إيجارها ثمانون ألف ين في الشهر .	بعيش بشقة، الإجارتها ثمانين ألف ين بالشهر.	انا بحجز غرفة بتكلفه ثلاثين دولار شهر.
هل هناك أماكن شاغرة بالنسبة لرحلة الخميس ؟	في أماكن فاظية برحلة يوم الخميس؟	في أماكن فاضي على الرحلة الجمعة؟
أعرف نادي قديم لموسيقى الجاز بوسط البلد .	بعرف نادي قديم لموسيقى الجاز بوسط البلد.	بعرف مكتب قديم ل موسيقى الجاز بالوسط البلد.
هل انعطف يساراً ؟	بدي ألف يمين؟	للل يمين؟
أحبه فعلاً .	بحبه فعلا.	بحبه كثير.
من فضلك احفظ هذه الحقائب في محتجز الجمارك .	لو سمحت خلي هالشنتات بالجمارك.	لو سمحت حط هاي الشناتي ب صالة الجمارك.
هل يمكنني استخدام إِشارة ضوئية ؟	ممكن استعمل إشارة ضوئية؟	بقدر أستخدم ة بطاقة.
أعمل في شركة نشر .	بشتغل بشركة نشر.	بشتغل بشركة نشرت.
اتجه يساراً في هذا الشارع ثم انعطف عند أول منعطف يمين .	روح يمين بهالشارع وبعدين اتوجه يمين عند اول منعطف.	روح يمين على الشارع بعدين للل شارع بعدين للل شارع بعدين للل شارع بعد أول شارع يمين.
بالفعل لدي أخبار . أنا سأتزوج .	فعلياً، عندي أخبار. أنا بدي أجوز.	أكيد عندي خبر. أنا رح أفارق.
واحد هامبرجر وواحد شيز برجر ، من فضلك .	واحد همبرقر وواحد شيز برقر، لو سمحت.	واحد لرر واحد شيار برجر، لو سمحت.
أوه ، آسف . كانت هناك مشاكل ونحن نقوم بحلها ، هل تتفضل بالانتظار لمدة ثلاثين دقيقة ؟	أووه، أنا آسف. كان في مشاكل منحلها. ممكن تستنى لثلاثين دقيقة؟	، آسف. كانت فيه مشكلة إحنا مشغولها ، بتقدر اقعد لمدة ثلاثين دقيقة؟
كم عددها ؟	كم عددها ؟	قديش عددها؟
و هو كذلك . سأوصلك إلى هناك .	و هو هيك . رح اوصلك لهناك.	هو هيك. رح يوصلك هناك.
أريد فندق أرخص قليلاً .	بدي فندق أرخص شوي.	بدي فندق أرخص شوي.
الأجدر بك أن تكف عن ذلك .	أحسنلك تبطل هالاشي.	لازم احكي على هيك.
هل أي من المتاجر الكبيرة به يعمل الآن ؟	في أي مول فاتحة هسه؟	أي محلات كبيرة فيه بتعمل هسا؟
كم تستغرق حتى تصبح متاحة .	قديش بدها حتى تصير فاظية .	قديش بدك لحتى تكون متوفرة.
معذرة . أريد أن أطلب طلب .	معلش . بدي أطلب طلب .	عفوا. بدي أطلب طلب.
عندنا حفلة مساء الجمعة . لماذا لا تنضم لنا ؟	عنا حفلة يوم الجمعة بالليل. ليش ما تيجي معنا؟	عنا حفلة المسا. ليش ما بتحجزنا؟
كيف أستقلها ؟	كيف اركبهاا؟	شلون أركبها؟
هل هي جولة يوم كامل ؟	هي الرحلة ليوم كامل؟	هي جولة يوم كامل؟
في أي وقت يمكنني مغادرة الفندق ؟	بأي ساعة ممكن أعمل خروج من الفندق؟	أي وقت بقدر أروح الفندق؟
أحضر لي بعض من الجبن المبشور .	هاتلي شوي من الجبنة المبروشة.	جيبلي شوية لحم للطاطة.
هل لديك أحذية حريمي عند أصابع القدم ؟	عندك كنادر ستاتي مفتوحة من عند الأصابع؟	عندك جاكيت سيداتي عند الوريد؟
هذه كبيرة جداً .	هاي كثير كبيرة.	هاي كبيرة كثير.
نبيذ غير حلو ، من فضلك .	واين بدون سكر، لو سمحت.	نبيذ مش حلو ، لو سمحت.
تبلغ الميزانية أقل من ألف دولار .	الميزانية أقل من ألف دولار.	بتكلفك أقل من خمسين دولار.
إنها معطلة . هل تستطع فحص آلة التصوير هذه ؟	هاي معطلة. بتقدر تشيّك على آلة التصوير هاي؟	هاي جاهز. بتقدر تفحص الكاميرا هاي؟
لقد كان هناك حادث مرور .	كان في حادث سير.	كان في حادث.
إجمالي سكان اليابان حوالي مائة وثلاثين مليوناً .	العدد الكلي لسكان اليابان حوالي مية وثلاثين مليون.	كم أشخاص اليابان تقريبا خمسين وتسعين دولار.
أي نوع من الملابس ؟	أي نوع من الأواعي ؟	شو نوع الثياب؟
في أي مجال كان من قبل ؟	بأي مجال هو كان قبل؟	بأي مكان كان من قبل؟
كم تتكلف الليموزين للذهاب إلى وسط المدينة ؟	قديش تكلف الليموزين عشان نروح عوسط البلد؟	قديش بتكلف الليووزين رايح على الوسط المدينة؟
الاسم هو جورو موتوياما . والرقم هو صفر ثلاثة ثلاثة اثنان ستة واحد اثنان أربعة تسعة خمسة .	الاسم هو جورو موتوياما . والرقم هو صفر ثلاثة ثلاثة اثنان ستة واحد اثنان أربعة تسعة خمسة .	اسمي هو سوو ماروو. رقم هو صفر ثلاثة ثلاثة اثنين ثلاثة اثنين ثلاثة اثنين أربعة تسعة خمسة.
لا ، ولكن شكراً لك . إنني أشعر بتحسن .	لا، بس شكرًا هونيك. أنا حاسس انو صرت أحسن.	لا، بس شكرا الك. أنا حاس حاس حاسي.
هل لك أن نبدل مقاعدنا من فضلك ؟	ممكن نبدل كراسينا لو سمحت؟	ممكن تغير مقاعدنا لو سمحت؟
هل هناك مكان يتم فيه عزف الموسيقي الريفية ؟	ما في أي مكان بعزف ألحان ريفية؟	في مكان رح نحكي موسيقى العائلي؟
هلا أخبرتني قبل أن نصل إلى درهام ؟	بصير تخبرني قبل ما نوصل لـ درهام؟	ممكن تحكيلي قبل ما نوصل لللللللللللللللللووو؟
ظل سائراً عبر هذا الممر , وستجدها على الجانب الأيمن .	ظل ماشي بالممر هاذ , و رح تلاقيها عالجهة اليمين.	ضل ع الطريق, رح تلاقيها على اليمين.
أشعر بصداع .	بحس بصداع.	حاس وجع.
عامل الصيانة سيصعد في الحال .	عامل الصيانة راح يطلع مباشرة.	عامل الصيانة رح تصعد هسا.
هل تمانع في جلوسي هنا ؟	بتمانع لو اقعد هون؟	عندك مانع أقعد هون؟
لقد قمت بزيارة البحيرات الكبرى لأول مرة .	هاي أول مرة بزور البحيرات الكبرى.	كنت ازور البحيرات الكبيرة مرة مرة.
أصبت بالتهاب في الحلق .	التهب حلقي .	حسيت بوجعتين بال الحلق.
نسافر جواً ثلاث مرات في الأسبوع ، أيام الثلاثاء والجمعة والسبت .	بنسافر بالطيارة ثلث مرات بالأسبوع، الثلاثاء، الجمعة والسبت.	نروح جوا ثلاث مرات يوم يوم السبت.
نعم . أيقظني من النوم بعد ثلاثة ساعات , من فضلك .	أيوة . صحيني من النوم بعد ثلاث ساعات, لو سمحت.	اه. ني من النوم بعد ثلاث ساعات, لو سمحت.
إلى أين يجب علي أن أنقل ؟	لوين لازم أحول؟	وين لازم احكي؟
لا أعرف كثيراً عن النبيذ ؟ ماذا يناسب هذا الطبق ؟	أنا ما بعرف كثير بالواين. شو بنفع مع هاذ الأكل؟	ما بعرف شو هاظ العصير؟ شو بظن هاي الأكل؟
وللشرب ؟ .	بتشرب إشي ؟ .	بشربوا ؟
نعم ، هذا لا يشمل الوجبات .	أيوة، هاذ ما بشمل الأكل.	اه ، هاظ مش بشمل الأكل.
قمة جبل " فوجي " هي اعلي قمة جبلية في اليابان حيث يبلغ ارتفاعها ثلاثة آلاف وسبعمائة وستون مترا .	جبل فوجي هو أعلى قمة باليابان على ارتفاع ثلاثة ألاف وسبعمية وستين متر.	لالطابق " لزي " هي أعلى وحدة الجبل باليابان.
هل يمكن أن ترسل أحدا ؟	ممكن تبعت حدا؟	بتقدر تبعث حدا؟
هل من الممكن أن تفصل أكثر ؟	يتقدر توضح أكثر ؟	بتقدر يوصل أكثر؟
أريد واحدة حديثة .	بدي وحدة جديدة.	بدي وحدة حديثة.
حسنا ، ولكن ليس منطقة المقاعد المكشوفة . فاليوم شديد الحرارة .	طيب ، بس مش على مكان الكراسي المكشوفة. اليوم كثير شوب.	ماشي، بس مش منطقة المقاعد المكشوف. اليوم كتير حلوة.
سأرسلها لك ، لذا من فضلك انتظر هنا .	راح أبعثها الك، عشان هيك استنى هون لو سمحت.	رح أبعثها إلك، لو سمحت أنتظر هون.
أخشى أن يكون هناك خطأ في الفاتورة .	خايف يكون في غلط بالفاتورة.	خايف يكون فيه غلط بال الفاتورة.
هذا بارد إلى حد ما . هل يمكن أن تقوم بتسخينه ؟	هاظا بارد شوي. ممكن تسخنه؟	هاظ بارد كثير. بتقدر تتغطسه؟
هلا راقبت حقيبتي من فضلك ؟	ممكن تراقبلي شنتي ، لو سمحت؟	ممكن تشوف شنتاتي لو سمحت؟
لا امتلك أي نقود .	ما معي مصاري.	ما عندي مصاري.
أريد عامل تشغيل يتحدث اليابانية من فضلك .	بدي شغيل بيحكي ياباني لو سمحت.	بدي عامل شغل بحكي ياباني لو سمحت.
يبدو أنها نادرة جداً .	شكلها نادرة كثير.	شكله كثير محظوظ.
إنني على يقين أن المجرم قريب .	أنا متأكد إنه المجرم قريب.	أنا متأكد انه الحرامي قريب.
أجل ، أظن أني سوف أنظر .	ايوا، بظن إني رح اطلع.	أه، بتوقع اني رح أشوف.
هل يوجد أحد يستطيع العزف على البيانو ؟	في أي حدا بعرف يعزف عالبيانو؟	في حدا بعرف عزف على الجازو؟
لستُ معتمداً قانونياً .	أنا مش مؤهل.	مش معتمد قانونيا.
هل يمكنك أن توصل أمتعتي إلى الغرفة ؟	ممكن توصل اغراضي للغرفة؟	بتقدر توصل اغراضي للالغرفة؟
هل الشوارع الخلفية خطر ؟	الشوارع الخلفية خطرة ؟	الشارع الجاية غلط؟
هل لك أن توقظني في تمام السادسة من فضلك ؟	بتقدر تصحيني الساعة ستة، لو سمحت؟	بتقدر تحجزني الساعة سبعة لو سمحت؟
أشعر بحالة سيئة وغثيان .	حاس بلعية ووظعي زفت.	حاس بوجعي.
لقد اتصلت منذ ثلاثة أيام بخصوص حقيبة ضائعة .	اتصلت من ثلاث أيام عشان شنتة ظايعة.	اتصلت من ثلاث أيام بخصوص شنتة غلطة.
بضع دقائق أخرى من فضلك .	كم دقيقة كمان اذا سمحت.	شوي شوي لو سمحت.
لم أدرك الرحلة رقم عشرون المتجهة إلى سان فرانسيسكو .	ما لحقت الرحلة رقم عشرين اللي رايحة عسان فرانسيسكو.	ما فهمت الرحلة رقم عشرين رايحة على سان فرانسيسكو.
آه ، عندك ؟ بالتأكيد إن لديك تشكيلة كبيرة .	أها، عندك؟ طبعا إنت عندك تشكيلة كبيرة.	اه، عندك؟ أكيد عندك؟ عندك هاظ تشكيلة كبيرة.
بطريقة أبطأ ، من فضلك .	بشكل أبطأ ، لو سمحت.	بسرعة ، لو سمحت.
إنه لا يلائمني .	مش مناسبني.	مش مش مش عاجبني.
هل من الممكن إجراء اتصال على أن يتم تحصيل أجرته من الطرف الآخر ؟	ممكن أعمل مكالمة وتوخذوا حقها من الطرف الثاني؟	ممكن لتصل على من الطرف الثاني؟
عندك أية شيء يمكن أن أتعاطه للطفح الجلدي ؟	عندك أي اشي ممكن آخذه عشان هاذ الطفح الجلدي؟	عندك إشي ممكن آخذ لغطس الجلدي؟
هل تفضلت و احتسيت القهوة معي ؟	تتفضل و تشرب قهوة معي؟	تكرمت ل وجبت قهوة معي؟
سأقوم بتسجيل الدخول في تمام الساعة الثامنة مساءاً تقريباً .	راح أنزل بالفندق حوالي الساعة ثمنية المسا .	رح احجز الدخول تقريبا الساعة تسعة المسا تقريبا.
إننا على ارتفاع اثني عشر ألف قدم .	احنا على ارتفاع اتناشر ألف قدم.	احنا على فوق عشرين ألف.
لقد تمتعت بإقامتي . شكراً لك .	انبسطت بإقامتي . شكراً الك.	انبسطت بقعدي. شكرا الك.
أُفضلُ حجرة هادئة .	بفظل غرفة هادية.	بدي غرفة لطيفة.
كان يجب تدبير وسيلة مواصلات . ذاهبة إلى بوسطن .	لازم ندبر طريقة أو سيارة رايحة على بوسطن.	كان لازم أحجز سيارة. رايح على بوسطن.
لقد سرق مسجل الفيديو من غرفتي .	سرقو مسجل الفيديو من غرفتي.	سرق الكاميرا من غرفتي.
هذا هو طبقنا المميز , سمك موسى المشوي الخاص بدوفر .	هاذ طبقنا الخاص, سمك موسى المشوي الخاص بدوفر.	هاظ هو الأكل الجميل, سمك مارو بدرو.
هل يمكن أن أختر جريدة يابانية , من فضلك ؟	ممكن اختار جريدة يابانية، لو سمحت؟	ممكن أجيب جريدة يابانية, لو سمحت؟
هل لي أن أقاطعكم ؟	ممكن أقاطعكم؟	ممكن أحكيك؟
هل يوجد بالقرب من هنا مطعم صيني ؟	في مطعم صيني قريب من هون؟	في قريب من هون مطعم يابانية؟
لا أريد أي شيء يكون كبير الحجم .	ما بدي أي اشي ظخم.	ما بدي اشي صغير الحجم.
هل أنت الأخير في هذا الصف ؟	إنت الأخير بهاذ الصف؟	إنت أول الصف؟
إن محفظتي نشلت في القطار .	وحدة سرق محفظتي في القطر.	محفظتي لظفار بالقطار.
