# Supplementary material for: Exploring prompting for dialectical machine translation: a focus on north Jordanian Arabic
Source: PeerJ journal article supplement (doi:10.7717/peerj-cs.3209), 2025-11-12
Supplement: Code.zip [file AraT5_base_prediction.xlsx]

## Sheet: Sheet1
MSA	IrbidDial	T5
ما رأيك في مشاهدة فيلم آخر ؟	شو رأيك نشوف فيلم ثاني؟	ما رأيك أن أشاهد فيلما آخر ؟
أريد كوبا من الماء لأتناول بعض الدواء , من فضلك .	بدي كاسة مي عشان اوخذ الدوا، لو سمحت.	أريد كوب من الماء لأخذ الدواء ، من فضلك.
أبغي كرة .	بدي طابة.	أريد طبقة.
كيف تحب أن يصفف شعرك اليوم ؟	كيف بدك يسرحلك شعرك اليوم؟	كيف تريد أن تأخذ الشعر اليوم ؟
أريد رداءا ذات أكمام طويلة .	بدي جاكيت كم طويل.	أريد معطف من طويل.
ها-ها . صباح الخير حان دورك . إنه على ما يرام .	هههه. صباح الخير صار دورك. هو كويس.	هذا. صباح الخير كان الدور. هو جيد.
أين نتقابل ؟	وين بدنا نتلاقى؟	أين سوف نلتقي ؟
لقد أثلج صدري زيارة مقاركم الرئيسية وكذا ما جرى بيننا من مناقشات مهمة . شكراً جزيلاً على ما أبديتموه من تعاون .	فرحت كتير لما زرت مكاتبكم الرئيسية وكمان النقاشات الهمة اللي صارت بيناتنا. كتير شكراً على العون اللي قدمتوه.	لقد سعدت كثيرا عندما زرت مكتبتك الرئيسية وآنسة الجولة كبيرة في هذه الأنشطة. شكرا على مساعدة كل شيء.
هل هذا قطار مباشر ؟	هاذ القطار مباشر؟	هل هذا القطار السريع ؟
إبريق من القهوة ، لطفاً .	بكرج قهوة، لو سمحت.	لرر قهوة ، من فضلك.
كم تكلفة الإفطار ؟	بقديش الفطور ؟	هل في أي وقت الإفطار ؟
من فضلك اختر لي مائدة ذات منظر ليلي لطيف .	من فظلك إختارلي طاولة مع منظر حلو بالليل.	من فضلك تفضل طاولة مع منظر جميل ليلا.
أين الحلاق ؟	وين الحلاق؟	أين الحلاق ؟
الشاطئ أسفل يمينا . ياله من منظر رائع .	الشط تحت على اليمين. شو المنظر بجنن.	شاطئ يمينا على اليمين. ماذا يبدو هذا منظر رائع ؟
كلاً ، إنهم متينين جداً .	لا، هظول كثير قويات.	لا ، هذا كبير جدا.
اتجه يسارا عند الناصية الثالثة .	روح يسار من عند الدخلة الثالثة .	خذ يسارا من عند الدخول الثالثة.
أين المحطة النهائية للحافلة ؟	وين اخر موقف للباص؟	أين آخر موقف للتوبيس ؟
كم يتقاضى المرشد في اليوم ؟	قديش بيوخذ الدليل باليوم؟	كم تستغرق الحصول على الدليل في اليوم ؟
أريد كيساً من الفشار ، من فضلك .	بدي كيس بوشار، لو سمحت.	أريد كيس لللللللللللللللللللللللللللللللللللللللللللللللللللللللللللللللللللللللللللللللللللللللللللللللللللللللللللللل ل ل للللللللل
من فضلك غير خمسين آلاف ين إلى دولارات أمريكية .	لو سمحت اصرف الخمسين ألف ين لدولر أمريكي.	من فضلك ادفع خمسين ألف ين دولارا دولار.
أريد قاموس جيب ، من فضلك .	بدي قاموس بنحط بالجيبة ، لو سمحت.	أريد موسوعة لللنظف في الحقائب ، من فضلك.
من فضلك ، أريد فنجاناً من القهوة البيضاء .	لو سمحت ، بدي فنجان قهوة بالحليب.	من فضلك ، أريد قهوة بحليب.
هل يمكن أن أحصل على قمصاني نظيفة غداً صباحاً ؟	ممكن ألاقي قمصاني نظيفات بكرا الصبح؟	هل يمكنني الحصول على شيرتي نظيفة غدا غدا ؟
حسنا , حجرتك يا آنسة هي رقم تسعة صفر ثمانية . هذا مفتاحك .	طيب، غرفتك يا آنسة هي تسعة صفر ثمنية. هاذ مفتاحك.	حسنا ، غرفتي ياآنسة هي تسعة صفر ثمانية. هذا مفتاحك.
نعم ، بالطبع .	أيوا، أكيد.	أيا ، بالتأكيد.
ما تكلفة المقاعد الخاصة بالشرفة ؟	قديش بتكلف الكراسي تبعت البرندة؟	كم تكلف المقاعد التي التي التي التي التي التي التي التي في هذه الحديقة ؟
هل لي بدليل سياحي ؟	ممكن مرشد سياحي؟	هل يمكن أن أخبرني مرشد سياحي ؟
أجل ، وأودّ محاسبة المطلوب هاتفياً على قيمة المكالمة .	صح، وأنا بدي احاسب يلي رنيت عليه على حق المكالمة.	حسنا ، أنا أريد أن أدفع ما اتصلت به على ثمن مكالمة.
جلد التمساح الأمريكي .	جلد التمساح الأمريكي.	اللون السمك الأمريكي.
سأكون هنا الساعة الثامنة إلى الربع .	رح أكون هون الساعة ثمانية إلا ربع.	سأذهب هنا في السابعة عشر من صباح الغد.
أظن أن الملابس المصنوعة في اليابان قد جرى تفصيلها على نحو أفضل بالتأكيد .	بتوقع انو الأواعي اللي صنعت في اليابان تفصلت بطريقة أحسن أكيد.	أعتقد أن ملابس اليابان مصنوعة في طريقة أفضل جدا.
سأكون هناك حوالي السادسة مساءً .	راح أكون هناك حوالي الساعة ستة المسا.	سأذهب هناك حوالي الساعة السابعة صباحا.
لا أجيد الإنجليزية . هل ثمة من يتحدث اليابانية هنا ؟	أنا مش بعرف أحكي إنجليزي. في حدا بحكي ياباني هون؟	أنا لا أعرف التحدث الإنجليزية. هل يوجد شخص يتحدث اليابانية هنا ؟
إنني أتصل من كشك عمومي في ماسي .	أنا بحكي معك من كشك عام بماسي.	أنا أتحدث لك من متجر العام في بسكي.
كم الوقت ؟	قديش الساعة؟	كم الساعة ؟
إنني أبحث عن هذا .	أني بدور على هاظ.	أنا أبحث عن هذا.
لماذا لا تعطيها هدية ؟	ليش ما تعطيها هدية؟	لماذا لا تعطيني هدية ؟
استمتعنا بالعشاء .	كيفنا عالعشا.	كيفنا في العشاء.
سأذهب بك على مقعدك . من هنا ، من فضلك .	راح اوديك على كرسيك. من هون، لو سمحت.	سأخذك على مقعدك. من هنا ، من فضلك.
سأعود إليك عندما تكون أقل انشغالاً .	راح أرجعلك بس تكون مش مشغول كثير.	سأعود لك فقط لا أعمل كثيرا.
أنا السيد تكاهاشي بالغرفة رقم خمسة تسعة وأربعين . من فضلك أرسل أربع زجاجات من بيرة بودفايزر .	أنا الأستاذ تكاهاشي بالأوضة رقم ٥٩ . لو سمحت بدي أربع بطولين من البيرة بودفايزر.	أنا السيد هو السيد ، رقم عشر. من فضلك أريد أربعة مترين من البيرة كرالتتتتا.
حسنا ، إنه وقت الغداء . هل تحب أن نناقشه على الغداء ؟	ماشي، وقت الاكل صار. بتحب نحكي عنها واحنا ناكل؟	حسنا ، وقت الطعام كان. هل تحب أن أخبرها عندما نأكل ؟
هناك الكثير من الينابيع الحارة .	في كثير ينابيع حارة.	هناك الكثير من العصائر حارا.
سر مباشرة ، من فضلك .	روح ع طول، لو سمحت.	لقد اذهب بسرعة ، من فضلك.
هل تمانع إذا التقطت صورة لك ولسيارتك الأجرة ؟	بتمانع لو أخذت صورة إلك وللتكسي تبعتك؟	هل يمكن أن تأخذ صورة لك لي بتوبيسك ؟
كم من الوقت نحتاج للذهاب مشياً من هنا إلى مبنى البلدية ؟	قديش بدنا وقت عشان نمشي من هون لبناية البلدية؟	كم يستغرق الوقت للذهاب إلى مركز البلدية ؟
هل تستطيع أن تخفض سعرها لوجود بعض البقع بها ؟	بتقدر ترخصها لأنه في عليها شوية بقع؟	هل يمكنك أن تخفضها من فضلك ؟
شكراً ، هذا يكفي .	شكراً ، هاظ بكفي.	شكرا ، هذا جيدا.
أريد الشخص الذي يعد وثائق عادية في حجم ورقة الخطاب بدون الحاجة إلى طيهم .	بدي الشخص اللي بعمل الوثائق اللي بحجم الورق العادي بدون ما يظطر يثنيهم.	أريد الشخص الذي تعمل وثائق حجم الورق العادي ، لا يمكن أن أхватها على مقاس الورق العادي.
هل نحتاج إلى طرح هذا للتصويت ؟ إن لم نكن في حاجة إلى هذا ، فإمكاني أن أعتقد حينئذ أننا قد وصلنا إلى نتيجة , سأقوم بإرسالها إلى مجلس إدارتنا صباح غد .	هل احنا محتاجين نحط هاظ للتصويت؟ اذا لأ، بتوقع أنه وصلنا للنتيجة، بدي أبعثها لمجلس ادارتنا بكرا الصبح.	هل نحن أحتاج إلى أن أضع هذا للخابة ؟ لا أعتقد أننا وصلنا إلى النتيجة ، سأرسلها إلى مكتب مكتبنا غدا.
أين مترو الأنفاق ؟	وين المترو؟	أين المترو ؟
كنت أفكر في الحصول على هذه الدورة في فترة نصف العام المقبلة .	كنت بفكر أوخذ هالكورس بفترة نص السنة الجاية.	أنا أريد أن آخذ هذا الأتوبيس في فترة نصف العام القادمة.
الخامس عشر من سبتمبر يوم احترام المسنين .	خمسطعش تسعة هو يوم احترام المسنين.	ثلاثة عشر عشر هو يوم قبول المسنين.
ارفعوا أيديكم .	ارفعوا إيديكو	من فضلك.
أين موقف الحافلات ل بي ؟	وين مجمع الباصات ل بي ؟	أين محطة الحافلات إلى بي ؟
قم بدفعها من فضلك , إن كان ذلك ممكنا .	لو سمحت دزها , إذا بصير	من فضلك ، لتتتت, من فضلك. هل يمكن أن أسخنها, هل يمكن أن يكون.
لقد نسيت أن آخذ حقيبتي اليدوية .	نسيت آخذ شنتة الإيد.	لقد فقدت حقيبةي.
فكرة صائبة . متى تخطط للمجيء ؟	فكرة صحيحة. متى بتنوي تيجي؟	لقد نسيت فكرة الصحيحة. متى تريد أن تأتي ؟
اثنان ويسكي مع الماء , من فضلك .	تنين ويسكي مع مية, لو سمحت.	أربعة سكي مع مائة ، من فضلك.
على فكرة , هل أنت غير مشغول السبت القادم ؟	بالمناسبة، راح تكون فاضي السبت الجاي؟	من فضلك ، هل ستكون مفتوحة يوم الجمعة القادم ؟
هل لديك هذا باللون الأخضر الداكن ؟	عندك هاذ باللون الاخضر الغامق؟	هل لديك هذا باللون الأزرق الأزرق ؟
هالو ، هل هذه تعود إلى روي ؟	مرحبا، هاي لروي؟	مرحبا ، هل هذه لي ؟
أريد حامل ثلاثي .	بدي حامل ثلاثي.	أريد حقيبة ثلاثون.
عظيم . كنت أبحث عن سيارة أجرة لكن هذا أفضل .	كتير حلو. كنت قاعد بدور على تاكسي بس هاي احسن.	حسنا. كنت أبحث عن سيارة أجرة فقط هذه أفضل.
ثلاثة اثنان واحد اثنان . انتظر ثانية ، حسنا ؟ أريد أن أرسل لك شيئاً هنا . معذرة .	ثلاثه اثنين واحد اثنين. استناني شوي , طيب؟ بدي أبعثلك اشي هون. اعذرني.	ثلاثة اثنان واحد اثنان. من فضلك. دعني أرسل لك شيء هنا. شكرا.
حسنا ، إنه باهظ الثمن . إنه لم يصنع في اليابان ، أليس كذلك ؟	تمام ، هو غالي .اكيد مش صنع اليابان، مش؟	حسنا ، هو غالية. أليس كذلك ؟
ويسكي اسكتلندي وماء من فضلك .	ويسكي اسكتلاندي ومية لو سمحت.	سكي صنو ، مائة من فضلك.
هل توجد أية كازينوهات جيدة ؟	في أي كازينوهات حلوة؟	هل يوجد أي الملاهي جميلة ؟
إنها عاملتني كما لو كنت متسولاُ .	عاملتني كإني شحاد.	لقد كنت لُُُُُُُُُُُُُُُُُُُُُُُُُُُُُُُُُُُُُُُُُُُُُُُُُُُُُُُُُُُُُُُُُُُُُُُُُُُُُُُُُُُُُُُُُُُُُُُُُُُُُُُُُُُُُ.
شخص ما فتح الطرد الخاص بي .	في حد فتح الطرد تبعي.	هل يوجد أي أي أي أي أي تفتيش على الطرد الخاص بي.
هل تريد أن افحص موتور السيارة ؟	بدك ياني أفحص ماتور السيارة؟	هل تريد أن أفحص صهريج السيارة ؟
أنا في نزهة طويلة سيرا على الأقدام .	أني طالعة برحلة طويلة تمشاية عجري.	أنا ذاهب في رحلة طويلة لغطسي.
هذه الأيام ، استخدم الكمبيوتر بشكل دائم في العمل .	هاي الأيام ، أنا بستخدم الكمبيوتر دايماً بالشغل.	هذا الأيام ، أنا أستخدم الكمبيوتر دائما في العمل.
موظفو المبيعات في هذا المتجر لطفاء جداً .	موظفين المبيعات بهاذ المحل لطيفين كثير.	من موظفي المبيعات في هذا المتجر لطيف جدا.
الثاني من على اليسار .	الثاني عالشمال .	هذا إلى اليسار.
هل أنزل هنا لمركز روكفيلر ؟	أنزل من هون عمركز روكفيلر؟	هل أنزل من هنا من فضلك من فضلك. هل أصعد من هنا من فضلك.
هذه السيدة كاوازو في غرفة رقم ستة عشر أحدى عشر .	هاي الست كاوازو بالغرفة سطعش إحدعش.	هذه هي السيدة سوو في الغرفة في عشر عشر.
هل تستطيع خفضها حتى عشرين دولار ، من فضلك ؟	بتقدر تنزلها لعشرين دولار، لو سمحت؟	هل يمكنك أن انزلها لنصف عشرين دولارا ، من فضلك ؟
أشعر بتحسن .	حاس بتحسن.	أشعر بالغثيان.
هل يمكنكم صرف الشيك ذو المائتي دولار الخاص بي ؟	بتقدروا تصرفولي الشيك أبو الميتين دولر تاعي؟	هل يمكن أن تعطيني الشيك ل ين دولار الخاص بي ؟
ولكن لا ضرورة لدفع بقشيش .	بس ما في داعي للبخشيش.	لا يوجد أفضل للغطس.
لقد جاء لتوه .	جا هسا.	لقد جئت الآن.
لنتصل به .	خلينا نرلنه.	دعني لللللله.
بالمناسبة ، اسمي هيروش إيجيما .	بالمناسبة، اسمي هيروشي ايجيما.	هذا حقا اسمي سكاي أووا.
التاسع والعشرون من أغسطس .	تسعه وعشرين من آب.	من أغسطس.
هل لا زال لديكم مقاعد لعرض الليلة ؟	ظل في عندكم محلات لعرض الليلة؟	هل يوجد لديكم محلات لعرض الليلة ؟
أريد القيام بحجز للساعة الثالثة والنصف ظهراُ .	بدي أعمل حجز للساعة ثلاثة ونص الظهر.	أريد أن أعمل حجز في الساعة الثالثة والنصف الظهر.
سوف نحضرها الآن . ما هو رقم غرفتك ؟	رح نجيبها هلا . شو رقم غرفتك ؟	سأصلها الآن. ماذا رقم غرفتك ؟
رقم غرفتي هو ثلاثة ستة وعشرين . هل يمكن أن تأخذ الغسيل ؟	رقم غرفتي هو ثلاثة ستة وعشرين. بصير توخذ الغسيل؟	رقم غرفتي هو ثلاثة ستة وعشرين. هل يمكنك أن تأخذ الغسيل ؟
أليس لديك دروس تجريبية ؟	ما عندك كورسات تجريبية؟	لا لديك تدريبات تجريبية ؟
رحلة الطيران دلتا رقم ثمانية وعشرون والمتجهة إلي نيو أورلينز سوف تتأخر حوالي ساعة .	رحلة الطيارة دلتا رقم ثمانية وعشرين اللي رايحة على نيو أورلينز حتى تتأخر حوالي ساعة.	رحلة الطائرة نيو نيو سيوللينز المتجهة إلى سان سان سانون بعد تأخير حوالي دقيقة.
هل لديكم غرفة متاحة الليلة ؟	عندكم غرفة فاضية الليلة ؟	هل لديكم غرفة مفتوحة الليلة ؟
بصراحة ، لا أتفق مع ذلك .	بصراحة، ما بتفق مع هاظ.	نعم ، لا أعتقد أن هذا ليس ليس ليس ليس في هذا.
هل لك أن تتفضل وتملأ هذه ؟	بتقدر تتكرم و تعبي هاي؟	هل يمكنك أن تفضل أن تفتح هذه ؟
يبدو أن النقود التي أعطيتني إياها ناقصة عشر دولارات .	شكله المصاري اللي إنطيتني اياها ناقصة عشر دولارات.	يبدو أن النقود التي طلبتيها من فضلك ، ناقص عشر دولارات.
بالخارج .	برا.	من الخارج.
أريد ما يخصني لكي أرحل .	بدي اللي بخصني مشان أروح.	أريد ما يجب أن آخذني للذهاب.
هل يمكن أن ترسلها إلى عنواني في اليابان عن طريق بريد الطرود الدولي وتحصل الثمن من هناك ؟	ممكن توديها على عنواني باليابان عن طريق صفحة الطرود الدولي و توخذ حقه من هناك ؟	هل يمكنك أن ترسلها إلى عنواني في اليابان عن طريق مكتب الطوابع الدولي ، أن تأخذ سعرها من هناك ؟
أين قسم السيدات ؟	وين قسم النسوان؟	أين قسم السيدات ؟
إنه ألم حاد .	هو وجع قوي.	إنه ألم شديد.
إنني في نفس السن .	أني بنفس العمر.	أنا في نفس العمر.
فكرة جميلة .	فكرة حلوة.	لقد أخبرت عن فكرة جميلة.
هل الأجانب يمكنهم الحصول على الكتب في المكتبة ؟	بقدروا الأجانب يستخدموا الكتب بالمكتبة؟	هل يمكن أن تستخدم ، الإنجليز في الكتب في المكتبة ؟
تحية . أنا جون .	مرحبا. أني جون.	مرحبا. أنا سانت سانت.
هل يمكن أن نبدأ اللعب عندما ينتهون ؟	بنقدر نبلش نلعب لما يخلصوا؟	هل يمكن أن نقوم باللعب عندما نصل ؟
مائة وخمسة وثلاثون ين للدولار الواحد .	مية وخمسة وثلثين ين للدولار الواحد.	مائة خمسة و عشرون دولارا دولارا واحد.
نعم . انتظر , سوف احضر لك واحدة .	طيب. استنى، راح أجيبلك وحدة.	حسنا. دعني أحضر لك واحدة.
هلا أنزلتني عند فندق هلتون من فضلك ؟	ممكن تنزلني عند فندق الهيلتون لو سمحت؟	هل يمكنك أن تأخذني إلى فندق هيلتون من فضلك ؟
أين الاستعلامات الرياضية ؟	وين الاستعلامات الرياضة؟	أين الالاستعلامات الرياضة ؟
هذه هي فلوس أقلام الحبر . فاتورة بمائة دولار .	هايذ حق قلام الحبر. فاتورة بمية دولار.	هذا حقوق الطوابع الملون. فاتورة في مائة دولارا.
لا ، شكراً . من الأفضل أن لا أشرب المزيد .	لا، شكراً. احسنلي ما أشرب اكثر من هيك.	لا ، شكرا. أفضل لي أن أتناول طعام أكثر من ذلك.
بما في ذلك الإفطار ، والضريبة ، ورسم الخدمة ، سيكون الحساب خمسة أربعون دولارا للشخص الواحد في الليلة .	بتشمل الفطور، الضرايب، ورسم الخدمة، الحساب رح يكون خمسة وأربعين دولار للواحد في الليلة.	لقد تتضمن الإفطار ، الضرائب ، رسوم الخدمة ، الحساب سيكون خمسة وعشرين دولارا واحد في الليلة.
ما عرض الأوبرا اليوم ؟	شو عرض الأوبيرا اليوم؟	ما عرض المشروب اليوم ؟
أريد مقعداً يطل على الممر ، من فضلك .	بدي كرسي يطل عالممر، لو سمحت.	أريد مقعد تطل إلى الطريق ، من فضلك.
أجل أريد شيئاً أقرؤه .	أيوا بدي إشي أقراه.	أي أي أي أيا أريد أن أتناول شيئا أقرأواه.
غير محتمل بدرجة كبيرة .	بنطاقش بدرجة كبيرة.	أي حد حد حدا في حد حد كبيرة.
هل تعرف المطعم يا كيويا ؟	بتعرف المطعم يا كيويا؟	هل تعرف مطعم يا سووو ؟
يستطيع الصرافون أن يغيروا دولاراتك من أجل بقشيش الكازينو . هل نذهب ؟	السمسارين بقدروا يصرفولك الدولرات عشان بخشيش الكازينو. بصير نروح؟	للركابين يمكن أن أصرف الدولارات إلى تذاكر الالملاهي. هل يمكن أن نذهب ؟
يسعدنا أن نقدم لك الشراب الذي تريده متبوعاً بالغداء . دليل كامل بالمشروبات التي نقدمها على رحلتنا موجودة في دليل المعلومات الخاص بمجلتنا .	بسعدنا إنه نقدملك العصير اللي بتختاره وبيلحقه الغدا . منوفر قائمة كاملة من الشراب في هاي الرحلة موجودة بقسم المعلومات تاع مجلتنا.	أود أن أطلب لك عصيرا التي تريدها و تحصل على قائمة كامل من الفاكهة في هذه الرحلة. سوف أتناول القائمة التابعة إلى مجلةنا.
هل أستطيع تأجير أداة للتنفس أثناء السباحة ؟	بقدر أستأجر شغلة للتنفس خلال السباحة؟	هل يمكنني استئجار عمل للغطس في السباحة ؟
آه . هل يمكنني الحصول على وجبتي فيما بعد ؟ أنا أشعر أنني لست على ما يرام الآن .	ممم. ممكن أخد وجبتي بعدين؟ حاسس حالي مش على بعضي هسا.	لا. هل يمكن أن آخذ وجبةي بعد ؟ أعتقد أنني لا أعرف وحدي الآن.
ما هو رقم الرحلة الجوية ؟	شو رقم رحلة الطيران؟	ما رقم رحلة الطيران ؟
أبغي تأجير سيارة من هذا الطراز لمدة يومين .	بدي استأجر سيارة من هاذ الموديل لمدة يومين.	أريد استئجار سيارة من هذا الطراز لمدة يومين.
أنا غير متأكد إذا كنت قد حزمت ملابس كافية لرحلة مدتها ثلاثة أيام .	أنا مش متأكد اذا جهزت وعية بتكفيني لرحلة مدتها ثلاث أيام.	أنا لا متأكد إذا تركت صلصة لللسافر في رحلة لمدة ثلاث أيام.
يوجد بجانب هذا المبني تحديداً .	هو جنب هاذ المبنى بالتحديد .	إنه بجوار هذا المبنى بالضبط.
هه . هذه . يبدو اللون جميلاً عليك .	هه. هاي. شكل اللون حلو عليك كثير.	نعم ، هذه. شكل اللون جميل جدا.
هل أستطيع تناول غذائي الآن ؟	ممكن أوكل هسا؟	هل يمكنني أن أتناول طعام الآن ؟
هل يتوقف القطار في برايتون ؟	بوقف القطار عند برايتون؟	هل يتوقف القطار في شيكاغو ؟
من المهم جدا أننا نستطيع الوصول إلى المواد الخام التي نحتاجها في المشروع .	اشي كثير مهم إنه قدرنا نوصل لمجموعة المواد الأساسية اللي راح نحتاجها للمشروع.	شئ جدا جدا من الصعب أن نصل إلى مجموعة المواد الرئيسية التي يجب أن أحتاجها للطبخ.
أود أن أطلب بدلة داكنة من أجلي .	بدي أطلب بدلة لونها غامق عشاني.	أريد أن أطلب هدية لون أبيض لي.
هذا جيد . متى هو ؟	هيك تمام. متى رح يكون؟	هذا جيد. متى سيكون ؟
أرغب في شراء شامبو .	أنا بدي أشتري شامبو.	أنا أريد شراء شامبو.
خمسون جنيهاً .	خمسين قنيه.	خمسة زجاجة.
لا يوجد رسم ضروري .	مش موجود رسم ظروري.	لا يوجد طابعا جيدا.
هل كان لديك أية خدمات أخرى إلى جانب طعام الإفطار هذا الصباح ؟	في عندك أي خدمات ثانية غير فطور الصبح؟	هل لديك أي خدمة أخرى على الإفطار ؟
متى يفتح المصرف ؟	أميت بفتح البنك؟	متى تفتح البنك ؟
إجمالي المبلغ المطلوب مائتان وثلاثة وأربعون جنيه ، يا سيدتي .	المبلغ الكلي بطلع ميتين وثلاثة وأربيعين جنيه، يا مدام.	ما هو المبلغ كامل يصل نصفون وسبعون دولار ، يا سيدي.
لماذا لم يأت إلى الحفلة أمس ؟	ليش ما اجى على الحفلة امبارح؟	لماذا لا أذهب إلى حفلة الليلة اليوم ؟
أريد لفتان من ISO مائة ، فيلم ملون ، ستة وثلاثين لقطة ، من فضلك .	بدي لفتين أيزو مية، فلم ملون، ستة وثلاثين لقطة ، لو سمحت.	أريد لنوين ، فيلم ملون ، ستة وثلاثين صورة ، من فضلك.
هل لديك مرآة ؟	عندك مراية؟	هل لديك حمام.
هل من المقبول عدم اتباع أي شخص لتعليمات الأمن ؟	بصير حدا ما يتبع تعليمات الأمن؟	هل يمكن أن تأخذ أي إجراءات الشرطة ؟
علىّ أن ألحق بطائرة العاشرة صباحاً .	لازم ألحق طيارة الساعة عشرة الصبح.	يجب أن أجد طائرة في الساعة العاشرة صباحا.
من اين يمكنني الحصول على مسكوكة لركوب المترو ؟	من وين ممكن أجيب تذكرة لأركب المترو؟	من أين يمكنني الحصول على تذكرة ركوب المترو ؟
أين يمكنني تغير نقودي ؟	وين بقدر أصرف مصاريي؟	أين يمكنني أن أصرف نقودي ؟
هل بها جهاز تدفئة ؟	بيها جهاز تدفئة؟	هل توجد هناك جهاز غطس ؟
أريد بعض الكريم الليلي .	بدي كريم ليلي.	أريد عصير ليلا.
كم تتقاضى ثمنا لإرسالها لليابان ؟	قديش بدك توخذ عشان تبعثها على اليابان؟	كم تستغرق للحصول على إرسالها إلى اليابان ؟
أكيدا التي تتحدث معك ، أنا عندي حجز مائدة في تمام الساعة السادسة والثلث هذا المساء . ولكني آسفة لأني سأصل متأخرة نصف ساعة .	أكيدا يلي بتحكي. عندي حجز طاولة عالساعة ستة و ثلث المسا. بس آسفة لإني رح أوصل متأخرة نص ساعة.	بالتأكيد ، أنا أتحدث. لدي حجز مائدة في الساعة السابعة و عشر دقائق. لكنني آسف أن جئت متأخرة نصف دقيقة.
متي سنستقل القارب ؟	متى بدنا نركب القارب؟	متى سوف ركب السفينة ؟
أرغب في غرفة بحمام .	بدي غرفة بحمام.	أريد غرفة في حمام.
معذرة , متي ينتهي هذا الفيلم ؟	عفواً, متى بخلص هذ الفلم؟	معذرة, متى تبدأ هذا الفيلم ؟
لقد تمكنت من تحقيق ذلك .	قدرت أوصل لهذا الشي.	هل يمكن أن أصل إلى هذا الشيء ؟
هل هو طريق طويل ؟	هو الطريق طويل؟	هل هو الطريق طويل ؟
ما هي الأنواع التي لديكم ؟	شو الأنواع اللي عندكم؟	ما أنواع هذه هذه لديكم ؟
سأرتبك . هل تمانع في رسم خريطة لي ؟	رح أرتبك. ما عندك مشكلة ترسملي خريطة؟	سأقيمك. هل لديك مشكلة أن تقرأ لي خريطة ؟
لدينا جمبري رائع جداً اليوم .	عنا جمبري مميز كثير اليوم.	لدينا سمك رقيق جميل اليوم.
هل لديك أيّ خرائط بسيطة للمدينة ؟	عندي أي خرايط بسيطة للمدينة؟	هل لديك أية خريطة صغيرة المدينة ؟
معذرة أريد الذهاب إلى فندقي في المدينة بالحافلة . أين يمكن أن أستقل حافلة ؟	عفواً، أنا بدي أروح على الفندق موجود بالمدينة بالباص. من وين بقدر آخذ باص؟	نعم ، أنا أريد الذهاب إلى الفندق في الحافلة. أين يمكنني الحصول على حافلة ؟
شكراً . لكنني لا أعتقد أن عندي وقت للإقامة لمدة ليلتين . هل يمكنك حجز غرفة بسريرين لي في ذلك الفندق ليلة الثاني عشر من مارس فقط ؟	شكراً ، بس ما بتوقع أنه معي وقت عشان أظل ليلتين. ممكن تحجزلي غرفة مزدوجة في الفندق لليلة اثنعش ثلاث بس؟	شكرا ، لكن لا أعتقد أنني أستطيع أن أكون في غرفة مزدوجة في الفندق لمدة ثلاثة أيام. هل يمكنك أن تحجز لي غرفة مزدوجة في الفندق لمدة ثلاثة أيام فقط ؟
بالتأكيد . كيف يمكننا خدمتك ؟	أكيد. كيف منقدر نخدمك؟	بالتأكيد. كيف يمكن أن نساعدك ؟
شيكات سياحية . شكراً . خذ تذكرتك وبطاقة المرور للصعود على متن الطائرة . كن هناك قبل وقت الرحلة بساعة من فضلك .	شيكات سياحية. شكراً. أخذ تذكرتك و الفيزا عشان تطلع على الطيارة. كون هناك قبل الرحلة بساعة لو سمحت.	شيك سياحية. شكرا. خذ تذكرة بطاقة بطاقة بطاقة بطاقة بطاقة السفر للذهاب إلى الطائرة. سوف تذهب إلى الطائرة قبل الرحلة ساعة من فضلك.
أوافق . يجب أن تصبح طبيعية جداً .	أنا موافق. لازم تصير طبيعة كثير.	أنا مرحبا. يجب أن تكون طبيعة كبيرة.
أهذه عيادة إف ؟	هاي عيادة إف؟	هل هذه عيادة كو ؟
هل لك أن تغيرهم إلى دولارات من فضلك ؟	ممكن تحولي اياهم لدولارات، لو سمحت؟	هل يمكنك أن تأخذها إلى دولارات ، من فضلك ؟
حسناً . أراك الساعة الثانية يوم الأحد .	تمام . بشوفك الساعة ثنتين يوم الأحد.	حسنا. سأتصل بي في الساعة الثالثة يوم الأحد.
هل يمكنك أن تشذب شاربي ؟	ممكن لو سمحت ترتبلي شواربي؟	هل لك أن تضع قططي ؟
أود أن أصرف هذا الشيك بسبعين دولاراً .	بدي أصرف هاذ الشيك بقيمة سبعين دولر.	أريد أن أصرف هذا الشيك في مائة دولارا.
الجزء المكتوب بالطريقة المائلة يشير إلى التغييرات التي حدثت في التسعينات .	الجزء اللي مكتوب بالطريقة المايلة بدل على التغييرات اللي صارت بالتسعينات.	كل الجزء ما هو دليل على التغييرات التي كانت في التاسعة عشر.
هل تشمل هذه الرحلة زيارة لبرج سيرز ؟	بتشمل هاي الرحلة زيارة لبرج سيرز؟	هل تشمل هذه الرحلة جولة إلى برج سيسكي ؟
أين ستنتهي الجولة ، ومتى ؟	وين راح تخلص الرحلة، و أميت؟	أين سوف تستغرق الرحلة ، أين أين ، أين أين ، أين ، أين ؟
تفضل هذان دولاران . احتفظ بالباقي .	تفظل هي دولرين. خلي الباقي إلك.	إنها دولارا. أعطني الباقي لك.
هل يوجد أي محل متعدد الأقسام قريب من هنا ؟	في أي مول قريب من هون؟	هل يوجد أي متجر بالقرب من هنا ؟
هل ستزال تعمل جدول المواعيد ؟	هل رح تظل جدول المواعيد شغّالة؟	هل ستكون جدول المواعيد مفتوحة ؟
سوف آخذ هذه ، من فضلك .	راح آخذ هاظ ، لو سمحت.	سأأخذ هذا ، من فضلك.
يقولون أن اليابان دولة غنية جداً .	بقولوا أنه اليابان بلد غني.	أعتقد أن اليابان بلد جيد.
ملعقتين , من فضلك .	معلقتين , لو سمحت.	مطرقة, من فضلك.
أجل ، واحدة فقط . متى سأعرف ؟ وكيف سيتم تعويضي ؟	أها، بس وحدة؟ متى رح أعرف؟ وكيف رح يكون التعويض؟	أيها ، فقط واحدة ؟ متى يمكنني أن أعرف ؟ كيف سيكون التعويضات ؟
هناك ، أمام بيانات السائح تماما .	هناك ، قدام بيانات السايح بالزبط .	هناك ، بجوار بيانات السائق بالضبط.
أين أجد الاسطوانات المدمجة ؟	وين بلاقي السيديات؟	أين أجد المركبة ؟
أنا متأثر للغاية , لا أستطيع البقاء ساكنا .	أنا متأثر كتير, ما قادر أضل ساكت.	أنا مصدوم جدا, لا أستطيع أن أجدي في المكان.
هل هو قريب لنصل إليه سيراً .	هو قريب عشان نوصلو مشي؟	هل هو قريب إلى الوصول إلى طريق المرور ؟
إني من إسبانيا .	أنا من إسبانيا.	أنا من اليابان.
ـ أين أقرب محل جزارة ؟	وين أقرب لحام؟	أين أقرب مصلا ؟
أود تأجير هذا الطراز من السيارات لمدة أربعة وعشرين ساعة .	بدي أستأجر هاذ الموديل من السيارات لمدة أربع وعشرين ساعة.	أريد استئجار هذا الطراز من السيارات لمدة أربعة وعشرين دقيقة.
لا يمكن أن أبيع هذه دون روشتة .	ما بقدر أبيع هاي بدون وصفة طبية.	لا أستطيع شراء هذه بدون وصفة طبية.
هل لديك صحف يابانية ؟	عندك جرايد يابانية؟	هل لديك أية ملابس يابانية ؟
هل هذا الحذاء متين ؟	هاذ البوط قوي؟	هل هذا الحذاء شديد ؟
لكنّي لدى موعد لرؤيتها في السّاعة الثّانية .	بس أنا عندي موعد عشان أشوفها الساعة ثنتين.	أنا لدي موعد لرؤيةها الساعة الثالثة.
هل لديك غرف أكبر ؟	عندك غرف أكبر؟	هل لديك غرفة أكبر ؟
اعطني عامل التليفون من فضلك .	إعطيني عامل التلفون لو سمحت .	أعطني طبيب الهاتف من فضلك.
ظننت أنكم أيها الشباب تأكلون الكعك المخبوز فقط .	فكرت إنكو يا شباب بتوكلوا الكعك المخبوز بس.	أعتقد أن كككا للل خبز فقط.
أريد استئجار كرسي مركب .	بدي أستأجر كرسي اتمدد عليه.	أريد استئجار مقعد ، ققق.
أنا أبحث عن شيء أنيق .	أني بدور على اشي لايق.	أنا أبحث عن شيء جيد.
حسناً . هل يجب أن أقوم بتركيزها ؟	ماشي. لازم أساويها مركزة؟	حسنا. يجب أن أتناولها في مركزة ؟
قهوة مع القشدة والسكر ، من فضلك .	قهوة مع القشطة والسكر، لو سمحت.	قهوة مع الرذذة ، من فضلك.
سوف ننتظر . من فضلك اتصل بنا عندما تكون مستعداً .	رح نستنى . لو سمحت, إتصل فينا لما تكون جاهز.	سأنتظر. من فضلك, اتصل بنا عندما تكون جاهزة.
فقط سياحة .	بس للسياحة.	لا..
أحتاج إلى طيب .	بدي دكتور.	أريد طبيب.
إن الجونلات القصيرة ومعها الأحذية الطويلة لن تنقضي موضتها .	مش ممكن تخلص موضة التنانير القصيرة مع الجزم الطويلة.	لا يمكن أن تكون تقليد سجائر القصيرة مع الأمتعة الطويلة.
ألا ترغب في فنجان شاي ؟	ما بدك تشرب كاسة شاي؟	لا تريد أن تشرب كوبا من الشاي ؟
ليس تماماً . فقط شيء ما غير غالي الثمن .	مش هيك. بس إشي مش غالي.	لا ذلك. لكن شيء لا أرخص.
إذا كنت تودّ ، بإمكاننا الاستراحة هنا .	إذا إنت حاب، ممكن نستريح هون.	من فضلك ، يمكن أن remosيي هنا.
هل هذه كلها هي حقائبك ؟	هاي كلها شناتيك؟	هل هذه هي حقائبك ؟
هل تريد بالحلويات ؟	بدك حلويات؟	هل تريد الحلوى ؟
نعم ، لكن ليس قويا جدا .	اه ، بس مش قوي كثير.	نعم ، لكن لا جيد جدا.
ويسكي وماء ، من فضلك . هل لديكم وجبة خفيفة معه ؟	ويسكي ومي، لو سمحت. عندكم سندويشة صغيرة او شيء خفيف معه؟	سكي وسكي ، من فضلك. هل لديكم علبة صغيرة أو شيئا خفيف معه ؟
أتعرف كاثي ؟ إنه عيد ميلادها .	بتعرف كاثي؟ هاي حفلة عيد ميلادها.	هل تعرف ثث ؟ هذه حفلة عيد ميلاد.
أود تحميض هذا الفيلم . متي سيكون جاهزا ؟	بدي أحمض هالفلم. متى رح يكون جاهز؟	أريد أن أجفف هذا الفيلم. متى سيكون جاهزا ؟
تشغل أشخاصاً جدد في أبريل .	رح توظف ناس جداد في نيسان.	سوف تطلب أشخاص جدا في مايو.
سأكون سعيدا بذلك . متى ترغب في ذلك ؟	رح اكون مبسوط لهالشي. متى بدك ياه؟	سأذهب سعيدا لهذا الشيء. متى تريدها ؟
رائع .	بجنن.	حسنا.
من فضلك اتجه يساراً عند التقاطع التالي .	لو سمحت روح عاليسار بالتقاطع الجاي.	من فضلك اذهب إلى اليسار فيتقاطع القادم.
هلا أريتني بعض الفساتين ؟	ممكن توريني شوي من الفساطين؟	هل لك أن تخبرني بعض الموزات ؟
أين المقهى ؟	وين الكوفي شوب ؟	أين المقهى الطعام ؟
لا يمكنك جلب الألعاب النارية إلى كندا .	ما بتقدر تجيب ألعاب نارية على كندا.	لا يمكنك أن تحضر ألعاب الجوية إلى كندا.
اعتقد أن هذا عالي قليلا بالنسبة لي .	بتوقع أنه شوي عالي بالنسبة الي.	أعتقد أن قليلا مرتفع جدا على لي.
لم يعد بإمكانك حقيقةً أن تقوم بعمل تصميم دون كمبيوتر بعد الآن .	بطلت تقدر تعمل تصميم بدون كمبيوتر من هون و طالع.	لقد لم يمكن أن تعمل الرسم في هنا في هنا في جولة.
أريد اسطوانة مدمجة .	بدي سي دي.	أريد سي هذا.
هل يمكنني حجز غرفة بسريرين تطل على المحيط ؟	بصير أحجز غرفة بتختين بطل على البحر؟	هل يمكنني حجز غرفة في غرفة في غرفة في غرفة لغطستين. هل يمكن أن أحجز غرفة في غرفة في غرفة تطل على البحر ؟
مايومي , هل تسمح أن تملأ هذه الورقة بتوقيعك ؟	مايومي، ممكن تعبيي هاي الورقة بتوقيعك؟	لا يومي. هل يمكن أن أجفف هذه الورقة في بطاقة بطاقةك ؟
هلا أرشدتني إلى مطعم مفضل بين الشبان ؟	ممكن ادلني على مطعم معروف بين الشباب؟	هل لي أن تخبرني عن مطعم مشهور في الأطفال ؟
حجزنا مقعداً ليوم الخامس والعشرين من أكتوبر في الساعة الحادية عشر صباحاً .	حجزنا مقعد لخمسة و عشرين من شهر عشرة الساعة احدعش الصبح.	حجزنا مقعد خمسة وعشرون من أغسطس في الساعة التاسعة صباحا.
إن الناس ودودون جداً .	الناس حابيين كثير.	كل الناس ترغب في الكثير من الطعام.
متى يتعين علي أن أكون في المحطة ؟	أي وقت لازم أكون بالمحطة؟	أي وقت يجب أن أكون في المحطة ؟
ليس هذا صحيحاً . أنت دائما تعاملني .	هاظ مش صحيح . إنت دايما بتعاملني.	هذا ليس صحيح. أنت تحب أن تطلبني.
ما نوع العصير الذي تفضله ؟	شو نوع العصير اللي بتحبه ؟	ما نوع العصير الذي تحب ؟
هل لي في بعض الفلفل ؟	ممكن أخذ شوي فلفل؟	هل يمكن أن آخذ بعضالفلفل ؟
احتاج إلى بعض الهدايا التذكارية من نيويورك .	أنا بدي شوية هدايا تذكارية من نيويورك.	أنا أريد بعض الهدايا تذكارية من نيويورك.
اسمي " تارو تاناكا " لدي حجز مسبق .	اسمي " تارو تاناكا " عندي حجز من قبل.	اسمي " تارو ، اناكا " لدي حجز من قبل.
إنها الثالثة والربع .	الساعة ثلاثة وربع.	الساعة الثالثة والنصف.
كم التكلفة كلها ؟	قديش الكلفة كلها؟	كم تكلفة هذه ؟
لا أدري كم من النقود يجب علىّ تركه كبقشيش ؟	ما بعرف قديش لازم أترك بغشيش.	لا أعرف ما يجب على أن أترك باعبة.
سآخذ شيكولاتة ساخنة .	بدي آخذ هوت شوكليت.	أريد أن آخذ هووووكيز.
ماذا تنوي أن تفعل عقب الانتهاء من المدرسة . ؟	شو بتخطط تعمل بعد ما تخلص مدرسة؟	ما هي الخطة تعمل بعد أن تستغرق مدرسة ؟
أشعر بالغثيان .	بحس حالي بدي أتقيء.	أشعر أنني أريد أن أغسل.
ماذا ؟ هل عليك دفع ضرائب عندما يكون لديك أكثر من ثلاثة زجاجات كحول ؟	شو؟ عليك ضرايب بس يكون عندك أكثر من ثلاث قناني كحول؟	ما ؟ هل لديك تكلفة أكثر من ثلاثة زجاجة صابون ؟
لقد حصلت على بطارية فارغة .	بطاريتي صارت فاضية.	لقد سخّيت بطاقة بطاقةي.
معذرة . أنا طالب جامعي من اليابان . هل أنتم طلاب في جامعة نيويورك ؟	معلش، أنا طالب جامعي من اليابان. إنتوا طلاب بجامعة نيو يورك؟	نعم ، أنا طبيب طبيب من اليابان. هل أنت أستاذ في جامعة نيو سيك ؟
من الذي يعزف ؟	مين اللي عم يعزف؟	من الذي تعمل تدخين ؟
معطف رائع . هل هو صناعة بريطانية ؟	جاكيت حلو. هاد صنع بريطاني؟	وضحة جميلة. هل هذا مصنوع صيني ؟
هل لديكم فيلم شفاف ملون ؟	عندك فلم شفاف ملون؟	هل لديك فيلم ملون ؟
أين قسم السيدات ؟	وين قسم النسوان؟	أين قسم السيدات ؟
جميل الفستان التي ترتدينه .	حلو الفسطان اللي لابسيته.	حسنا ، لاُُُُُُُُنظف.
تموج شعر دائم مشدود من فضلك .	كيرلي عطول مشدود، لو سمحت.	سأصل إلى صابون رقيق ، من فضلك.
هل لدينا وقت كاف لإنهاء إجراءات المغادرة ؟	معنا وقت كافي لنخلص إجراءات المغادرة؟	هل لدينا وقت كافية للوصول إلى إجراءات المغادرة ؟
هل هناك جولة بالحافلة تجوب المدينة ؟	في دورة بالباص نلف بالبلد؟	هل هناك جولة في الحافلة تذهب في المدينة ؟
هل أستطيع الحصول على تذكرة متعددة الاستخدام ؟	ممكن أوخذ بطاقة ذكية؟	هل يمكنني الحصول على بطاقة معدنية ؟
كان فيلم " حرب الكواكب " أكثر الأعمال شعبية عام ألف وتسعمائة وأربعة وثمانون .	كان فيلم "حرب الكواكب" من أشهر الأفلام سنة ألف وتسعمائة وأربعة وثمانون.	كان فيلم " مباراة الشمس " من معظم الأفلام التي معظم الأفلام في عام مائة وتسعون.
أوه ، يجب أن تخطر القنصلية على الفور .	أوه، لازم تبلغ القنصلية هسا.	نعم ، يجب أن ترسل السفارة الآن.
هل يوجد ملهى ليلي جيد به عرض رقصة الفلامنكو ؟	في نايت كلوب رايق عنده رقصة الفلامنكو؟	هل يوجد صالة صالة تزلج جميلة لدي موسيقى الروموكي ؟
لماذا لم تقلع الرحلة ؟ أخبرني عما يجري .	ليش ما طلعت الرحلة؟ قلي شو بصير.	ما ما ما ما ما ما ما ما ما ما ما ما ما ما ما ما ما ما ما ما ما ما ما ما ما ما ما ما ما ما ما ما ما ما ما ما ما ما ما ما ما ما ما ما ما ما ما ما ما ما ما ما ما ما ما ما ما ما ما ما ما ما ما ما ما ما ما ما ما ما ما ما ما ما ما ما ما ما ما ما ما ما ما ما ما ما ما ما ما ما ما ما ما ما ما ما ما ما ما ما ما ما ما ما ما ما ما ما ما ما ما ما ما ما ما ما ما لم تصل الرحلة ؟ هل.
سأصبح بديناً في حال ما ظللت جالساً هنا آكل باستمرار .	رح أصير ناصح لو استمريت قاعد هون آكل دايما.	سأذهب دعني أتناول الطعام دائما.
هل على السيدات ارتداء فستان سهرة ؟	لازم الستات يلبسن فسطان سهرة؟	هل يجب على السيدات أن ترتدي صوف ليلة ؟
حسنا إذاً ، أريد عصا مضرب أصغر كتلك التي مع جوليا روبرتس .	ماشي يعني، بدي عصاة مضرب اصغر مثل اللي مع جوليا روبرتس.	حسنا ، أريد حقيبة ملاعق أصغر من گمآ مع سوزان لوكا.
أريد أن اتصل هاتفياً بالسفارة اليابانية .	بدي أحكي بالتلفون مع السفارة اليابانية.	أريد أن أتحدث بالبريد بالبريد إلى السفارة اليابانية.
هل هذه السجائر معتدلة ؟	هاي السقاير معتدلة؟	هل هذه صفيحة معتدل ؟
هل هذا طلب شخص آخر .	هاظا طلب واحد ثاني؟	هل هذا طلب واحد آخر ؟
في حالة إمكان ذلك , احجز منضدة بالقرب من النافذة من فضلك .	لو في امكانية, احجزلي طاولة عند الشباك لو سمحت.	من فضلك, حجز لي مائدة عند النافذة من فضلك.
هل يمكن أن نحجز طاولة لخمسة أشخاص ؟	ممكن نحجز طاولة لخمس أشخاص؟	هل يمكن أن أحجز مائدة لأربعة أشخاص ؟
شركة الخطوط الجوية اليابانية ، طائرة رقم واحد اثنان ثلاثة .	شركة الخطوط الجوية اليابانية، رحلة الطيران رقم واحد اثنين ثلاثة.	شركة الخطوط الجوية اليابانية ، رحلة الطيران رقم واحد اثنان ثلاثة.
من فضلك اتصل بي في الفندق عندما تجد حقائبي .	من فضلك، كلمني بالفندق لما تلاقي شنطي.	من فضلك ، اتصل في الفندق عندما تجد حقائبي.
ذلك الحد الأدنى للسعر .	هيك أقل سعر.	هذا أرخص سعر.
أنت محظوظ .	إنت محظوظ.	أنت محظوظ.
هل سيكون هذا المتجر مفتوحاً غداً ؟	راح يكون هاظ المحل فاتح بكرا؟	هل سيكون هذا المتجر مفتوح غدا ؟
وصلت الفاتورة لمائة دولار .	وصلت الفاتورة لمية دولار.	لقد وصلت الفاتورة إلى مائة دولار.
هل هذا مكتب الاستقبال ؟ هل يوجد عيادة قريبة ؟	هاظ مكتب الاستقبال؟ في عيادة قريبة من هون؟	هل هذا مكتب الاستقبال ؟ هل يوجد مكتب الاستقبال بالقرب من هنا ؟
كم عمر ابنتك ؟	قديش عمر بنتك؟	كم سنك ؟
لن ينضم للجولة الاختيارية إلا القليل من الناس .	ما رح ينضم للجولة الاختيارية غير شوي من الناس.	لا سوف ينضم إلى الجولة المزدوجة فقط.
إنها مجرد هدية تعبيرا عن تقديري .	هاي مجرد هدية تعبير عن تقديري.	هذا هو هدية هدية هدية من فضلك.
تحتاج لرؤية أخصائي .	بتحتاج تشوف دكتور متخصص.	هل تريد أن تشاهد طبيب اختصاصي.
كم تكلّف هي لكل جالون ؟	كم سعر الغلون الواحد؟	كم سعر الملاعق الواحد ؟
أيمكنني الحصول على جدول زمني ، من فضلك ؟	ممكن أحصل على جدول الوقت، لو سمحت؟	هل يمكن أن أحصل على جدول الوقت ، من فضلك ؟
لقد سُرقت حقيبتي .	انسرقت شنتتي.	لقد سرقت حقيبةي.
نستخدم الأعواد عندما نأكل .	بنستعمل العيدان لما بنوكل.	لستخدم البيضين عندما تدفع.
حسناً ، في حالة إصرار كليكما , سأذهب معكما .	طيب، اذا انتو الاثنين مصرين، أني راح اروح معكو.	حسنا ، نحن اثنين ، أنا سأذهب معك.
في أي محطة سأنزل للذهاب إلى مبنى إمباير ستيت ؟	بأي موقف لازم انزل عشان أروح على عمارة امباير ستيت؟	أي موقف يجب أن أنزل إلى فندق أوسكيت ؟
لابد أن تأخذها تسعة وتسعون مرة في اليوم ، قبل الوجبات .	لازم تاخذها تسعة وتسعين مرة باليوم، قبل الأكل.	يجب أن تأخذها تسعة وتسعين مرة في اليوم. قبل الطعام.
لا يا سيدي . هذه الظهيرة محجوزة بالكامل . ومع ذلك يمكن أن تحجز غدا .	لا، يا أستاذ، اليوم بعد الظهر كله محجوز. لكن بتقدر تحجز بكرا .	لا ، سيدي. اليوم بعد الظهر محجوز. لكن يمكنك حجز الغد.
هل هناك طبيب للفندق أو واحد على صلة بالفندق .	في دكتور للفندق أو واحد ع علاقة بالفندق؟	هل يوجد طبيب إلى الفندق أم واحد مع الفندق ؟
المياه الساخنة ليست ساخنة بالقدر الكافي .	المية الحامية مش حامية بشكل كافي.	كل كلها حارا بشكل جيد.
هل استرحت في نومك ؟	ارتحت بالنومة؟	هل سعدت في النوم ؟
أريد إعادة المال . هل يمكن أن أحصل على مالي ؟	بدي أرجع المصاري. بقدر أوخذ مصرياتي؟	أريد أن أعود النقود. هل يمكنني الحصول على زوجتي ؟
انها باتجاه الجنوب .	هي باتجاه الجنوب.	إنها إلى الشمال.
ما سعر تذكرة درجة أولى إلى إدنبره , من فضلك ؟	كم سعر تذكرة درجة أولى لإدنبره , إذا تكرمت.	كم سعر تذكرة الدرجة الأولى إلى شيكاغو ، من فضلك ؟
عندي قشعريرة .	عندي قشعيرية.	لدي علبة صابون.
لماذا , شكرا جزيلا . هل أستطيع الارتقاء للقمة ؟	ليش، شكراً كثير الك. بقدر اطلع للقمة؟	ما ما ما ما ما ما ما ما ما ما ما ما ما ما ما ما ما ما ما ما ما ما ما ما ما ما ما ما ما ما ما ما ما ما ما ما ما ما ما ما ما ما ما ما ما ما ما ما ما ما ما ما ما ما ما ما ما ما ما ما ما ما ما ما ما ما ما ما ما ما ما ما ما ما ما ما ما ما ما ما ما ما ما ما ما ما ما ما ما ما ما ما ما ما ما ما ما ما ما ما ما ما ما ما ما ما ما ما ما ما ما ما ما ما ، شكرا ، شكرا ، شكرا
لا . هل تحب الإبلاغ عنه ؟	لا . بدك تبلغ عنو ؟	لا. هل تريد أن ترسل على ما هي ؟
من فضلك غير هذه الينات إلى جنيهات .	لو سمحت اصرفلي هظول من ين لقنيه.	من فضلك ادفع هذا من ين إلى يرر.
سآخذ مقاعد درجة رجال أعمال ، أليس كذلك ؟	راح آخد مقاعد درجة رجال الأعمال، صح؟	سأأخذ مقاعد الدرجة درجة أفراد العمل ، أليس كذلك ؟
لا أستطيع أن أفعل ذلك , لكني سوف أضعها في الحقيبة لك .	ما بقدر اعمل هيك , بس رح احطها بالشنتة الك .	لا أستطيع أن أفعل ذلك, ولكن سأقيمها في الحقيبة لك.
إنه غالي الثمن إلى حد ما . ألا يمكنك منحي خصماً ؟	هاد كثير غالي. ما فيك تعطيني شوية خصم؟	هذا غالية جدا. هل يمكنك أن تعطيني بعض خصمك ؟
إن " السنة " متقلقلة .	ال"سنة" عم تتقلب.	هذا عام " ، في الجو.
سيكون جاهزا بعد غد في المساء .	راح يكون جاهز بعد بكرا المسا.	سوف يكون جاهزا بعد غدا.
هل ليدكم صناديق لإرسال الطرود ؟	عندكم علب لارسال الطرود ؟	هل لديكم علبة للشحن ؟
إن عثرت على شيء ، اتصل بي من فضلك .	لو لقيت إشي، رنلي إذا تكرمت.	من فضلك أرني من فضلك.
أود تقصيره ببوصة واحدة من هذه المنطقة .	بدي اقصّره بوسطة وحدة من هادي المنطقة.	أريد أن أمسحه في نصف المنطقة.
هل لديكم أي خبز ؟	عندكم خبز؟	هل لديكم خبز ؟
أود بعض البيجامات .	بدي بيجامات.	أريد معطفا.
أين يمكنني طباعة الفيلم ؟	وين بقدر أطبع الفلم؟	أين يمكنني الطباعة ؟
أيمكنك الحضور إلى هنا لإصلاحه ؟	ممكن تيجي هون عشان اتصلحه؟	هل يمكنك أن تحضر هنا إلى هنا للاتصال بي ؟
أين يمكنني أن أستقل حافلة لمشاهدة المعالم ؟	من وين ممكن اركب باص لحتى اتفرج ع المعالم؟	من أين يمكنني أن أستأجر حافلة لرؤية المعالم ؟
مرحبا يا سيدة ياماجوتشي ؟ فريقك على الخط . قبلت دعوتك . استمر من فضلك .	أهلا وسهلا يا سيدة ياماجوتشي، فريقك عم يكلمك. رديت على دعوتك. استمري، من فضلك.	مرحبا ، يا سيدتي يامايوكي. أنت أنت اتصل بك ، من فضلك.
هل لك أن تساعدني في الوصول إلى حقيبتي ؟	ممكن تساعدني ألاقي شنتيتي؟	هل يمكنك أن تساعدني في الحصول على حقيبتي ؟
آسف لقد نفذ هذا الصنف لدينا .	معذرة، هاد النوع خلص عنا.	معذرة ، هذا النوع لم لم نصل إلى لدينا.
ما اسم الشخص الذي تود التحدث إليه ؟	شو اسم الشخص اللي بدك تحكي معه؟	ما اسم الشخص الذي تريد أن تتحدث به ؟
لقد اجتزت هذا الاختبار بنجاح كبير .	عديت الامتحان بنجاح كبير .	لقد خضعت المباراة ببراعة جدا.
طبقاً لتقرير الطقس ، فإن غداً سيشهد سقوط جليد .	بناءً على النشرة الجوية، راح تثلج بكرا.	من فضلك ، سوف غطسا في الثلج غدا.
لا أستطيع ضبط اللوحة .	مش قادر أزبط الصورة.	لا أستطيع أن أجرب الصورة.
لا زالت غالية جدا . هل من الممكن أن آخذها بثلاثة دولارات ؟	بعدها غالية كثير. ممكن أشتريها بـثلث دولارات؟	لقد أسعار جيدة جدا. هل يمكن أن أشتريها في ثلاث دولارات ؟
نريد اثنين هامبورجر واثنين قهوة ، من فضلك ، نريد تناولها خارج المحل .	بدنا زوج همبرجر وزوج قهوة، لو سمحت، بدنا ناكلها برة المحل.	أريد اثنين نحنمر و سيدر و سيد القهوة ، من فضلك ، أريد تناولها خارج المتجر.
زدني قليلاً .	زيدني شوي.	لا أذهب إلى أسرع.
هل لي بشوكة أخرى ؟	بدي شوكة ثانية؟	أريد شوكة أخرى ؟
أنا هنا في مهمة إعلامية .	أنا هون بشغل إعلامي.	أنا هنا بعمل صحفي.
إنها ليست أحدث طراز ، أليس كذلك ؟	هاي مش أحدث موديل ، صح؟	هذا ليس آخر طراز ، أليس كذلك ؟
أبغي بعض الأقراص المنومة .	بدي حبوب منوم.	أريد أدوية منم.
أي حافلة تذهب إلى وسط المدينة ؟	أي باص رايح عالدوار الرئيسي؟	أي حافلة متوجها إلى الشارع الرئيسي ؟
أريد الذهاب إلى مركز هارفارد . هل يمكن أن تخبرني عندما نصل إلى هناك ؟	بدي اروح على مركز هارفارد. ممكن تقلي لما نوصل هناك؟	أريد الذهاب إلى مركز هارفارد. هل يمكنك أن تخبرني متى نصل هناك ؟
أريد أن أحجز على شركة نورث وست إيرلينز على الرحلة رقم صفر ثمانية ستة في الخامس .	بدي احجز على شركة نورث وست إيرلينز على الرحلة رقم صفر ثمانية ستة بخمسة الشهر.	أريد حجز على شركة ثوو وست سيسكي ، على الرحلة رقم صفر ثمانية ستة في الخامس من الشهر.
لقد استمتعت بالوجبة كثيراً جداً .	كثير استمتعت بالوجبة.	حسنا لقد استمتعت ب وجبة.
سيكون هناك تأخير بسيط .	راح يكون في تأخير بسيط.	سأتأخر قليلا.
فقط إذا كانت ملكك ، سيدي . هاها ، مزحة صغيرة .	بس اذا كانت ملكك ، يا سيدي . ههههههه، هاي مزحة صغيرة.	من فضلك ، يا سيدي. هذا ما هي مجاملة صغيرة.
نستطيع أن نرتب لتنظيف غرفاتكم .	ممكن نرتب معك عشان تنظيف غرفكم.	هل يمكن أن أحجز معك إلى أن أنظف غرفتي ؟
وما هي المثانة ؟	وشو هي المثانة ؟	ما هي المغتسل ؟
لا أستطيع النوم جيداً أثناء الليل .	ما قدرت أنام مليح بالليل.	لا أستطيع النوم جيدا ليلا.
ما هو مستوى مهارتك في عزف الكمان ؟	شو مستواك بعزف الكمان؟	ما هو هو طول اللعب في عزف التليفزيون ؟
ما هي أكثر الأشياء التي تثير اهتمامك الآن ؟	شو أكثر الأشياء اللي بتلفت انتباهك هسا ؟	ما هو أكثر الأشياء التي تجدِِِِِِِِِِِِِِِِِِِِِِِِِِِِِِِِِِِِِِِِِِِِِِِِِِِِِِِِِِِِِِِِِِِِِِِِِِِِِِِِِِِِِِِِِِِِِِِِِِِِِِِِِِِ ؟
اجعل قصة الشعر تتدلى لأسفل , من فضلك .	خلي قصة الشعر تنزل لتحت، لو سمحت.	من فضلك ، عن قصة الشعر تصعد إلى أسفل ، من فضلك.
هل لك أن تستدعي لي سيارة أجرة الساعة الثامنة صباح غد ؟	ممكن تجيبلي تكسي بكرا الساعة ثمنية الصبح؟	هل يمكنك أن تحضر لي سيارة أجرة غدا في الساعة التاسعة صباحا ؟
هلا ملأت هذا النموذج ؟	ممكن تعبي هاذ النموذج؟	هل يمكن أن تغسل هذا النموذج ؟
أيمكنك الانتهاء من ذلك بعد عشر دقائق ؟	بتقدر تخلص هاي بعد عشر دقايق؟	هل يمكنك أن تستغرق هذه بعد ثلاثين دقائق ؟
الملح من فضلك .	الملح لو سمحت.	الفلفل من فضلك.
لقد نمت و لم أتيقظ حين رن منبه السادسة و النصف .	نمت و ما صحيت ع منبه الساعة ستة ونص.	لقد كنت ، لم أعود في هاتف الساعة السابعة والنصف.
نحن من أكبر موردي أجهزة الميكروكومبيوتر .	إحنا من أكبر موردين لأجهزة الميكرو كمبيوتر .	نحن من أكبرمنافذ أجهزة ال الراديو كمبيوتر.
من فضلك أخبرني كيف أملأ بطاقة النزول إلى البر ؟	لو سمحت قلي كيف أعبي بطاقة النزول للبر؟	من فضلك أخبرني كيف أجفف بطاقة الذهاب إلى الشاطئ ؟
دجاج محمر ، من فضلك .	دجاج مشوي، لو سمحت.	لحم لحم ، من فضلك.
أجل ، ولكن هذا كثير جدا ، ولقد شبعت بالفعل .	أيوة، بس هاي كتير كثير ، وأنا صرت أكلت كفاية.	نعم ، لكن هذه كبيرة جدا ، أنا كنت أكلت كثيرا.
لقد أُغلق علي الباب . هل يمكن أن تفتح بابي , من فضلك ؟	ييي تسكر علي الباب . بتقدر تفتحلي الباب، لو سمحت؟	لا تفتح الباب. هل يمكنك أن تفتح الباب ، من فضلك ؟
بكل تأكيد . سنكون سعداء لفعل هذا .	أكيد. راح نكون مبسوطين نعمل هيك.	بالتأكيد. سوف نكون مسرورا من ذلك.
يقولون إن الأنفلونزا منتشرة هناك .	بيقولوا انو الإنفلونزا معمية هنيك.	أعتقد أن القشعريرة من فضلك.
هل ستدفع شركة الطيران رسوم الفندق والوجبات ؟	رح تدفع شركة الطيران رسوم الفندق والوجبات؟	هل ستدفع شركة طيران رسوم الفندق و الوجبة ؟
نسيت تذكرة الطيران الخاصة بي في الفندق .	نسيت تذكرة الطيارة قيتي بالفندق.	لقد نسيت تذكرة الطائرة في الفندق.
هل يمكن أن احصل على احدى المجلات أو شيئ من هذا القبيل ؟	ممكن أوخذ وحدة من المجلات أو شي زي هيك؟	هل يمكنني الحصول على واحدة منمجلات أو شيء هذا ؟
تناسبني تماما .	مناسبيتني كثير.	لقد كنت مناسبتي كثيرا.
خذني إلى المستشفى .	خذني على المستشفى.	أعطني إلى المستشفى.
ربما كان يعاني سّدَّة تنفسية .	ممكن عنده صعوبة بالتنفس.	هل يوجد عند لي صعوبة في التنفس ؟
كم تكلفة الذهاب إلى فندق سي ؟	قديش بتكلف الروحة لفندق سي؟	كم تكلف الذهاب إلى فندق سي ؟
هل هناك أي غرف خالية في عربة النوم ؟	ظل في أي غرف فاظية بعرباية النوم؟	هل يوجد أي غرفة سجائر في سيارة النوم ؟
هل يوجد بوتيك قريب من هنا ؟	في بوتيك قريب من هون؟	هل يوجد متجر سكي بالقرب من هنا ؟
عندما أرى الأسعار بهذا الرخص ، يبدو الأمر سخيفاً أن أشتري أي شيء في اليابان .	لما أشوف الأسعار بهالرخص ، بحس أنه مسخرة الواحد يشتري أي شي باليابان.	من الممكن أن أرى أسعار أسعار هذه ثمنها ، أشعر أن مشكلة شخص شراء أي شيء في اليابان.
لم يخرج من الماكينة شيء .	ما طلع من الماكينة إشي.	لا لم تأتي من الآلة شيء.
كم كان ثمنها ؟	قديش كان حقها ؟	كم كنت تكلفة الثمن ؟
أريد هدية بمناسبة الذكرى السنوية .	بدي هدية لمناسبة الذكرى السنوية.	أريد هدية بمناسبة العطلة السنوية.
علي أن ألحق طائرة متجهة للوس أنجليس باكر صباح غد .	لازم ألحق طيارة لوس أنجلوس بكرا الصبح بكير.	يجب أن أجد طائرة لوس أنجلوس غدا صباحا.
يا صاح , أتعرف أي مكان يستحق الرؤية قريبا من هنا ؟	أخوي، بتعرف أي مكان محرز الشوفة قريب من هون؟	أنا صديقي. هل تعرف أي مكان متأكد أن ل لتتتُتتتتت ل ل ل ل ل ل ل ل ل ل ل ل ل ل ل ل ل ل ل ل ل ل ل ل ل ل ل ل ل ل ل ل ل ل ل ل ل لتتُخذ ل لتتُتُت. هل تعرف أي مكان متأكد ؟
عندي الكثير من الوقت .	عندي وايد وقت.	لدي بعض الوقت.
من أين يمكنني شراء بعض الهدايا التذكارية ؟	منين بقدر أشتري شوية هدايا تذكارية ؟	من أين يمكنني شراء بعض الهدايا تذكارية ؟
أنظر إلى هذا . انظر إلى هذا . سوف تخبرني أن الاختلاف بين هذا الشاب وذلك الشاب هو الحظ ؟ محمد ، يقف بالسيارة في جانب الطريق ، وأنت ؟ لن تمانع في أن أنام معك هنا . أنا متأخر . كان لقاء جميل معك ؟	شوف هاظ. شوف هاظ. راح تحكيلي انو الفرق بين هالشب وهذاك الشب هو الحظ؟ محمد، واقف بالسيارة على زقاق الشارع، وإنت؟ ما راح تعترض اذا قعدت معك هون. انا تأخرت. كان لقاء حلو معك؟	هل أرني هذا. هل أنت ، ، ، ، أرني أن هو الشيء الذي هو الحظ ؟ أنا لم أمانع إذا جلست في الشارع ، أنت. هل أنت لم تفحص هذا ؟ أنا تأخرت. هل أنت لم أمانع إذا كنت تأخرت ؟ أنا تأخرت. هل أنت لم أمانع إذا كنت تأخرت. هل أنت لم أمانع إذا كنت تأخرت ؟ أنا تأخرت. هل أنت لم أمانع إذا كنت تأخرت. هل أنت لم أمانع إذا كنت تجلس في الشارع ، أنت ؟ أنا تأخرت. هل ، أخبرني أن هو الحظ ؟ هل أنت ، ،
أعمل في شركة تجارية .	أني بشتغل بشركة تجارية.	أنا أعمل بشركة تجارية.
أفهم ، لكن لا أستطيع أن أقولها .	فاهم، بس بقدر أقولها.	نعم ، ولكن أستطيع أن أتحدث.
نصف زجاجة , من فضلك .	نص قنينة ، لو سمحت.	ثلاثة زجاجة ، من فضلك.
متى تقام مباراة كرة القدم ؟	متى بتبلش مباراة كرة القدم؟	متى تبدأ مباراة مباراة مباراة مباراة مباراة كرة السلة ؟
ما هو متوسط أسعاركم للفاكس الدولي كل شهر ؟	كم معدل تكلفة الفاكس الدولي كل شهر؟	كم سعر الهاتف الدولي كل شهر ؟
انتظر دقيقة من فضلك .	استنى دقيقة لو سمحت.	سأنتظر دقيقة من فضلك.
هل هو محجوز بالكامل ؟	هو محجوز كله؟	هل هو محجوز كل ؟
شيء خطأ مع حقيبتك .	اشي غلط بشنتك .	شئ خطأ في حقيبةك.
كلا منا يريد أن يحاسب على وجبته .	إحنا كل واحد بدو يدفع عن أكلته.	نحن كل شخص تريد دفع عن وجبةه.
ألم تتلق الاستمارة بالطائرة ؟	ما أخذت الاستمارة بالطيارة؟	لم تأخذ المارة في الطائرة ؟
هل لديك أي شيء لفترة أطول قليلاً ؟	عندك أي اشي لوقت أطول شوي؟	هل لديك أي شيء أطول أطول ؟
أجل ، من فضلك أرسله إلى الغرفة اثنا عشر أربعة وثلاثون .	أيوه، لو سمحت وديه على الغرفة اثنعش أربعة وثلاثين.	نعم ، من فضلك أحضرها إلى الغرفة أربعة عشر أربعة وثلاثين.
أين البحيرة ؟	وين البحيرة؟	أين الحديقة ؟
هل هناك حافلة تذهب مباشرة إلى هناك ؟	في أي باص بروح هناك مباشرة؟	هل يوجد أي حافلة للذهاب إلى هناك مباشرة ؟
أريد هذا الطراز لخمسة أماكن مرصعة .	بدي هاي النوعية لخمس أماكن مرصعة.	أريد هذه النوعة خمسة أماكن صابونة.
هل لك أن تغلف هذه كالهدية ؟	ممكن تلفلي هاي كهدية؟	هل يمكنك أن ترسل هذه هدية ؟
نعم لدينا هذا ، سوف نجهزها لك .	اه موجود عنا. رح نجهزلك اياه.	نعم. لدينا. سوف نستخدمها لك.
هل يمكنك تبديل هذه بواحدة جديدة ؟	ممكن تبدلي هاي بوحدة جديدة؟	هل يمكن أن تغير هذه بواحدة جديدة ؟
عفواً . ستكون جاهزة في غضون خمس دقائق .	عفوا. رح تكون جاهزة خلال خمس دقايق.	نعم ، ستكون جاهزة في ثلاث دقائق.
أين يمكنني أن أشتري إبريقاً ؟	من وين بقدر اشتري بريق؟	من أين يمكنني شراء لمبة ؟
أعتقد أن عمره أكثر من خمسين سنة .	بتوقع عمره اكثر من خمسين سنة.	أعتقد أن العمر أكثر من خمسين سنوات.
أود أن أطلب , من فضلك .	بدي أطلب , بعد إذنك.	أريد طلب, من فضلك.
معذرة . كيف يمكنني الوصول إلى المصرف ؟	معلش، كيف بقدر أوصل للبنك؟	نعم ، كيف يمكنني الوصول إلى البنك ؟
لدي بعض الملابس للمغسلة .	عندي شوية وعية للغسيل.	لدي بعض أنسجة للغسيل.
كريمة وسكر ؟	كريمة وسكر؟	هل لحم سكر ؟
هل يوجد أي قطار سريع إلى بوسطن ؟	في أي قطار سريع لبوسطن؟	هل يوجد أي قطار سريع إلى بوسطن ؟
الحجوزات في السابعة ، تحت اسم مانو .	حجوزات الساعة سبعة، بإسم مانو.	حجز في الساعة السابعة ، اسم ياما.
أين أفضل مكان لمشاهدة المعالم ؟	وين أحسن مكان لشوفة المناظر؟	أين أفضل مكان لرؤية الصور ؟
هل يمكنك أن تريني كيف أضع الغاز ؟	ممكن توريني كيف أحط الغاز؟	هل لك أن تخبرني كيف أجفف الغاز ؟
علىّ أن أذهب ، سأتصل بك لاحقاً .	أني لازم أروح. رح أحكي معك بعدين.	أنا يجب أن أذهب. سأ أتصل بك بعد بعد.
لا كهرباء .	ما في كهربا.	لا يوجد هاتف.
ثلاثون دولاراً وثمانون سنتا .	ثلاثين دولار وثمانين سنت.	ثلاثة دولارات وثمانية سنتا.
هل تعرف طبيب أسنان جيد ؟	بتعرف دكتور اسنان كويس؟	هل تعرف طبيب الأسنان جيدا ؟
هل من الممكن أن أمكث في غرفتي حتى الثانية مساءً ؟	ممكن أظل بغرفتي للساعة ثنتين المسا؟	هل يمكن أن أعود في غرفتي في الساعة الثالثة مساءا ؟
إن حول غرفتي ضجيجا بالغا .	في ضجة كبيرة حوال غرفتي	هل هناك مطار كبيرة في غرفتي.
كم ستستغرق لكي تطلب ؟	قديش بدك يعني عشان تطلب؟	كم تريد أن تطلب ؟
معدتي تؤلمني بعد الوجبات .	معدتي بتالمني بعد الوجبات.	إنني أتناول وجبتي بعد الوجبات.
نفضل مائدة بجوار النافذة .	بنحب طاولة جنب الشباك.	أحب مائدة بجوار النافذة.
كنت على رحلة يونيتد إيرلاينز رقم ثمانية اثنان ثمانية .	كنت برحلة يونايتد إيرلاينز الرقم ثمانية اثنين ثمانية.	أنا في رحلة رينج سيسكي رقم ثمانية اثنان تسعة.
هل لك أن ترسم لي خريطة , من فضلك ؟	ممكن ترسملي خريطة، لو سمحت؟	هل يمكنك أن ترسم لي خريطة ، من فضلك ؟
هل بإمكاني اللمس ؟	بقدر ألمسه؟	هل يمكنني أن أرىه ؟
يصعب العثور على هذا المكان . إنه في طريق ضيق يتفرع من الطريق الرئيسي .	صعب يلتقى هالمكان. هو بدخلة بتتفرع من الشارع الرئيسي.	لا يمكن أن نلتقي هذا المكان. هو في في طريق متجهة إلى الشارع الرئيسي.
هلا أخذت هذه السراويل ؟	ممكن توخذ هاي البنطلونات؟	هل يمكنك أن تأخذ هذه الأحذية ؟
حسنا . إنها تتكلف خمسة وثمانون دولارا في البريد العادي وثلاثة دولارات في التوصيل الخاص .	طيب. بتكلف خمسة وثمانين دولر بالبريد العادي وثلاث دولرات بالتوصيل الخاص.	حسنا. تكلف خمسة وعشرين دولارا بالبريد العادي ثلاثة دولارات بالإتصال الخاص.
إذاً يمكنني بكل ثقة أن أزكي برج مدينة سان فرانسيسكو . فهذا يعطيك فكره عن سان فرانسيسكو .	يعني بنصحك عالأكيد ب برج مدينة سان فراسيسكو. رح يعطيك لمحة عن سان فرانسيسكو.	لانصحك على الأقل في برج مدينة سان سان سان سان سان سان سان سان سان سان سان سان سان سان سان سان سان سان سان سان سان سان سان سان سان سان سان سان سان سان سان سان سان سان سان سان سان سان سان سان سان سان سان سان سان سان سان سان سان سان سان سان سان سان سان سان سان سان سان سان سان سان سان سان سان سان سان سان سان سان سان سان سان سان سان سان سان سان سان سان سان سان سان سان سان سان سان سان سان سان سان سان س…
لدي تقدير كبير للموسيقى الكلاسيكية .	كثير بقدر الموسيقى الكلاسيكية.	حسنا يمكنني أن أستطيع موسيقى السينمائية.
من فضلك استعمل غرفة القياس هناك .	من فضلك استخدم غرفة القياس هنيك.	من فضلك استخدم غرفةمقاسك.
سر في نفس الاتجاه حوالي خمس دقائق ثم لف لجهة اليسار .	امشي بنفس الاتجاه حوالي خمس دقايق و بعدين ارجع على الشمال.	يذهب في الاتجاه حوالي خمسة دقائق ثم أعود إلى اليسار.
هل أجعله يعاود الاتصال بك عندما يعود ؟	بتحب أخليه يرجع يرنلك بس يرجع؟	هل تحب أن أسخّّّّّّّّّّّّّّّّّّّّّّّّّّّّّّّّّّّّّّّّّّّّّّّّّّّّّّّّّّّّّّّّّّّّّّّّّّّّّّّّّّّّّّّّّّّّّّّّّّّّّّّّّّّّّ يمكن أن آخذه أن أستعد أن أستعد أن أستعد
من المرجح أن محبا للإبداع الفني مثلك سيستمتع اللوحات الزيتية غير التقليدية وعروض الموسيقى بالشوارع .	متوقع من محب للابداع الفني مثلك راح ينبسط باللوحات الزيتية والموسيقى وعروض الموسيقى بالشوارع.	أعتقد أن شخص تحب الفن الخاص بك ، سوف ترحب بالملصقات المعدنية. وعروض موسيقى الشارع.
هل رشحت لي رحلة قصيرة ؟	هل اخترتلي رحلة قصيرة؟	هل تفضل لي رحلة قصيرة ؟
إنها سبعة عشر ايه . اوه ، انا آسف . لقد أخطأت .	هي سبعتعشر ايه . اوه ، أني آسف . غلطت	إنها خمسة عشر إيه. ، أنا آسف.
كم المدة التي قضتها هي حتى الآن في المملكة المتحدة ؟	قديش المدة اللي عاشتها بإنجلترا؟	كم المدة التي كنت تعيشها في انجلترا ؟
هل قرّرتَ ؟	قررت؟	هل قررت ؟
هل نذهب إلى أي مكان متحدثين مثل ذلك ؟	راح نظل نحكي هيك وين ما نروح؟	هل سأذهب إلى هذا أين لا نذهب ؟
سأذهب كي أسأل البواب عن الأجرة المناسبة .	رايح اسأل البواب عن الأجرة الصحيحة.	سأتصل بمكتب المفتاح عن الأجرة الصحيحة.
اللون البني محبب هذا العام .	اللون البني مرغوب هالسنة.	باللون أبيض مقبول هذا اليوم.
هناك قطع في بلوزتي . أتساءل هل يمكنك أن تخيطيه لي ، من فضلك ؟	في مزع ببلوزتي. بدي اسألك اذا بتقدر تخيطلي اياه، لو سمحت؟	هل لديك لللللللللييييي. هل يمكنك أن لنظفها ، من فضلك ؟
هل هذه هي آخر محطة ؟	هاظا آخر موقف؟	هل هذا آخر موقف ؟
هل يمكنني تركها في أي مكان من البلاد ؟	بقدر أسيبها بأي مكان بالبلد؟	هل يمكنني أن أضعها في أي مكان في البلد ؟
أريد بعض التفاح ، من فضلك .	بدي شوية تفاح، لو سمحت.	أريد بعض التفاح ، من فضلك.
أخشى أن لا يكون هنا أية دورة لتعليم الجولف .	خايف ما يكون في دورة لتعليم الجولف	أعتقد أن هناك دورة لتدريب الجولف.
دعني أحول هذه المكالمة إلى المسئول .	خليني أحوّل هاي المكالمة للمسؤول.	دعني أأخذ هذه مكالمة لل مكتب.
هل يمكن أن تحجزوا في العرض ؟	ممكن تحجزولي بالعرض؟	هل يمكن أن تحجز لي بالعرض ؟
أنا أقيم في فندق هيلتون .	أنا قاعد بفندق الهلتون.	أنا في فندق هيلتون.
أحب هذه الخدمة بتقديم شامبانيا للتحية بعد الإقلاع . دعني أشرب فى صحتك .	بحب هاي خدمة توزيع شامبانيا للترحيب بعد ما نطير. خليني أشرب بصحتك.	أحب هذه خدمة هدية هدية لتذكار. دعني أتناول سجائرا بعد أن لطير. دعني أتناول سجائرك.
ما هو الحد الأدنى للعمر لفعل ذلك ؟	إيش أقل عمر مسموح يعمل هيك؟	ما هو أقل سن مسموح على ذلك ؟
إلى فندقي ، من فضلك ، إن عنوان فندقي في هذه الورقة .	للفندق تبعي، لو سمحت، العنوان تبع الفندق ع هالورقة.	من فضلك ، العنوان الخاص الفندق في هذا الورقة.
أريد لقاء السيد ويليم .	بدي أشوف الأستاذ ويليم.	أريد أن أرى السيد سيووو.
النبيذ ليس باردا بشكل كافي . هل نمكنك أن تجعله أكثر برودة ؟	الواين مش بارد كفاية. ممكن تبرده اكثر؟	كلين لا بارد جدا. هل يمكنك أن تبردها أكثر ؟
بكم هذا العطر ؟	بقديش هاظا العطر؟	هل هذا العطر ؟
بالتأكيد سوف ترسلهم ، أليس كذلك ؟	أكيد راح تبعتثم، صح؟	بالتأكيد ستصل ، أليس كذلك ؟
أسف ، هذا المكان محجوز بالفعل .	آسف، هاذ المكان محجوز فعلاً.	آسف ، هذا المكان محجوز بالفعل.
من فضلك أعطني بعض النقود الفكة .	لو سمحت أعطيني شوية فراطة.	من فضلك أعطني بعض المتعة.
لا أعرف شيئاً عن هذا الأمر .	ما بعرف إشي عن هالشغلة.	لا أعرف شيئا عن هذا العمل.
حفلتك مقامة الآن . تفضل .	حفلتك مبلشة هسا. تفظل.	سأعود إلى حفلةك ، لا تعمل الآن. ، من فضلك.
أخطط للبقاء لمدة اثنا عشر يوماً .	بخطط أظل اثنعشر يوم.	أريد أن أكون في أربعة عشر يوم.
يوجد الكثير من السائحين بالقرب من المبنى ، ويبدو أنهم تجمعوا لإلقاء نظرة على ما يحدث .	في كتير سواح حوالين البناية، شكلهم متجمعين عشان يشوفوا شو اللي بصير.	هناك الكثير من لللتنزه في المبنى ، يبدو أن ، من فضلك ، متأكد من أن ، من الممكن أن نرى ما ما سيحدث.
هل لك أن تقدر التكلفة قبل أن تبدأ العمل فيها ؟	ممكن تقدر قديش بكلف قبل ما تبدا شغل فيه؟	هل يمكنك أن يمكنك أن يمكنك أن تطلب ما تريد فيه ؟
نعم . تم نقل أمتعة شخص آخر إلى غرفتي تواً . من فضلك ، هل من الممكن أن تقوم بفحصها ؟	اه، في شناتي لحدا ثاني وصلت غرفتي هسا.لو سمحت، ممكن تشوفها؟	نعم ، هناك حقائب من شخص آخر تصل غرفتي الآن. من فضلك ، هل يمكنك أن ترىها ؟
أريد أن أحصل على تعويض لذلك .	أنا بدي اوخد تعويض عن هاظ.	أنا أريد الحصول على تعويض من هذا.
بالتأكيد , كن على راحتك .	أكيد، كون على طبيعتك	بالتأكيد. دعني على ما يرام.
إن ثمة خطأ ما في بطاقة المفتاح هذه ، أعطني غيره ، من فضلك .	فيها غلطة شكلها بالكارت هاي، عطني وحدة ثانية، الله يخليك.	هناك خطأ شكل بطاقة البطاقة هذه ، أعطني واحدة أخرى ، من فضلك.
من فضلك اتصل لي برقم ثلاثة اثنان ستة اثنان تسعة واحد ثمانية .	لو سمحت، رنلي على الرقم ثلاثة اثنين ستة اثنين تسعة واحد ثمانية.	من فضلك أرني رقم ثلاثة اثنان ستة اثنان تسعة واحد تسعة.
أين مدخل مترو الأنفاق ؟	وين دخلة المترو؟	أين خارج المترو ؟
معذرة . ولكني أريد تسليم تقرير السرقة .	معلش، بس بدي أسلم تقرير السرقة.	نعم ، ولكن أريد أن أتناول تقرير السرقة.
هذا المقاس ، الذي تسميه المقاس العادي ، سوف تجده هنا .	هاذ الحجم ، اللي بتسميه حجم عادي، راح تلاقيه هون .	هذا الحجم ، التي هو مقاس عادي ، سوف تجدها هنا.
إنه رديء الصنع .	هو مش صنوع منيح.	إنه لا ليس ليس جيد.
هل يمكن أن تخبرني عن ساعات العمل ؟	ممكن تحكيلي عن ساعات الشغل؟	هل لك أن تخبرني عن ساعات العمل ؟
اعطني شهادة طبية , من فضلك .	عطيني وصفة طبية ، لو سمحت .	أعطني وصفة طبية ، من فضلك.
ليس معي فكة صغيرة .	ما معي فراطة.	لا لدي متعة.
هل يمكن أن أرى هذا ؟	ممكن أشوف هاظا؟	هل يمكنني أن أرى هذا ؟
ليس لدى أي شئ لكي أعلنه .	ما عندي أي اشي عشان أعلنه.	لا لدي أي شيء أن أراجعها.
أعتقد أنني تركت كاميرتي وغادرت عندما كنت أتناول العشاء هنا الليلة الماضية .	بظن اني تركت كميرتي و روحت لما كنت اكل هون امبارح عالعشا.	أعتقد أنني تركت حقيبة سيارتي عندما كنت أذهب إلى هنا غدا.
دعنا نجتمع لنبحث الأمر أكثر .	خلينا نلتقي عشان اناقش هاظ الموضوع أكثر.	سوف نتقابل إلى اللقاء على هذا الأمر أكثر.
هيه ، هذا فستان جميل حقا .	مرحبا ، هاذا فعلا فسطان حلو.	مرحبا ، هذا فعلا لصوف جميل.
من فضلك كن صديقي بالمراسلة .	من فضلك, كون صاحبي عالتواصل.	من فضلك, دعني أتحدث صديقي على الاتصال.
أعطني خمسين ، من فضلك .	اعطيني خمسين ، إذا سمحت.	أعطني خمسين ، من فضلك.
ما هذا المكان الذي نمر به الآن ؟	شو هالمكان اللي بنمر فيه هسا؟	ما هو المكان الذي تذهب بها الآن ؟
هل لي في استعارة بعض البياضات ؟	ممكن أستعير شرارشف؟	هل يمكنني الحصول على فحم ؟
أوه , يبدو كأنه قرعة .	أوه، شكله قرعة .	نعم ، يبدو من ما هي قرعة.
اشعر كأن هناك تحديق في . هل من النادر رؤية شخص ياباني ؟	حاسك بتسرح فيه. لهاي الدرجة قليل تشوف واحد ياباني؟	أشعر أنك غوص في هذا التزلج. هل هذه درجة كبيرة أن ترى واحد ياباني ؟
سنبعث لك بالبريد عشرين عينة إضافية .	رح نبعتلك عالبريد عشرين عينة زيادة.	سأرسل لك بالبريد عشرين عينة إضافية.
إن الرصيف رقم خمسة يقع هناك .	الرصيف رقم خمسة موجود هناك.	العمود رقم خمسة موجود هناك.
أين يوجد مكان لطيف لقضاء نزهة ليوم واحد ؟	وين بلاقي مكان لطيف أظل فيه رحلة ليوم واحد؟	أين أجد مكان جميل أن أذهب في رحلة يوم واحد ؟
يا سيد كاواي لدينا مائدة لك الآن . تفضل من هنا .	يا أستاذ كاواي، عنا طاولة الك حاليا. تعال من هون.	من فضلك سيدي ، لدينا طاولة لك الآن. دعني هنا.
لا توجد مشكلة . إذا حضرت في الخامس من سبتمبر ، فسيكون بإمكانك الاستمتاع بعرض فيلم علمي لأن عندنا يوماً خاصاً مفتوحاً أول يوم جمعة من كل شهر .	ما في مشكلة. اذا اجيت بخمسة تسعة ، بتقدر تستمتع بالفلم العلمي لأنه احنا عنا يوم مميز مفتوح بأول جمعة من كل شهر.	لا يوجد مشكلة. هل يمكنك أن تستمتع بال فيلم الصحي عندما جئت في الخامس تسعة ، يمكنك أن تستمتع بال فيلم الصحي عندما كنت لدينا يوم جميل مفتوح في يوم جديد في يوم جديد في يوم جديد من مايو.
هل بإمكاني الحصول على طبق آخر مثل هذا ؟	بقدر آخذ صحن ثاني مثل هاذ؟	هل يمكنني الحصول على طبق آخر أيضا أيضا أيضا ؟
لا تهتم . على أي حال ، خذني من فضلك إلى مركز الحي الصيني . سأحاول أن أجده بنفسي .	ما تشيل هم. يلا، خذني لو سمحت لمركز الحي الصيني. راح احاول ادور الجهة وحدي.	لا تقلق. من فضلك أرني إلى مركز المدينة اليابانية. سأنتظر المنطقة لوحدي.
أهه ، هيا . دولارين فقط .	اها، يلا. بس دولارين.	نعم ، هنا. فقط دولارا.
سندويتشان برجر بالجبن ، من فضلك .	اثنين برجر بالجبنة، لو سمحت.	اثنان مطعم في الجبن ، من فضلك.
أرغب في كريم مسائي للبشرة .	بدي كريم ليلي للبشرة.	أريد عصير ليلا للقشعريرة.
متى سنقلع ؟	أميت راح نقلع؟	متى سوف نذهب ؟
هذا طيب ، على ما يبدو .	هاذ طيب ، من شكله.	هذا جيد ، من شكله.
حسنا , الوقت متأخر إلى حد ما . أعتقد أنني يجب على أن أغادر الآن . شكرا جزيلا لك على الأمسية الرائعة .	ماشي, الوقت صار متأخر شوي. بظن انو لازم اروّح هسا. كتير شكرا على الليلة الممتعة.	حسنا ، الوقت متأخر قليلا. أعتقد أن الوقت لم لم أتناول ، من فضلك. شكرا على الليلة ممتعة.
لقد سقطت من على درجات السلم .	وقعت من على درج السلم	لقد سقطت من أسفل السلم.
هذه السن في المقدمة تؤلمني .	هالسنة في الامام بتوجعني.	هذا اليوم يؤلمني.
من أي نوع من الجلد الصناعي صُنعت حقيبة السفر هذه ؟	شو نوع الجلد الاصطناعي المصنوع منه شنطة السفر هاي؟	ما نوع الجلد الجلدية المصنوعة من حقيبة السفر هذه ؟
أين نشأت سمكات الفراش هذه ؟	من وين جاية سمكات الفراش هاي؟	من أين تأتي سمكات الغرف هذه ؟
سأخطط لإرسال فواتير حاجياتي اليومية ، لذا من فضلك أخبرني العنوان و اسم الشخص المسئول من فضلك .	رح أبعث فواتير حاجاتي اليومية، عشان هيك لو سمحت أعطيني عنوان واسم الشخص المسؤول.	سأرسل فواتير أمتعتي اليوم ، من فضلك أعطني عنوان اسم الشخص الخاص بي.
أريد نسخة من تقرير السرقة .	بدي نسخة من تقرير السرقة.	أريد نسخة من تقرير السرقة.
أريد السفر من شنغهاي إلى هاواي بالباخرة .	بدي أروح من شنغهاي لهاواي عالسفينة.	أريد الذهاب إلى طوكيو إلى المحطة.
جريدة باللغة الإنجليزية ، لطفاً .	جريدة بالانجليزي، لو سمحت.	تذكرتا الإنجليزية ، من فضلك.
هل هناك سيارة ليموزين ؟	في سيارة ليموزين؟	هل يوجد سيارة لللوزين ؟
لا أريد واحدة ضخمة .	ما بدي وحدة دفشة.	لا أريد واحدة لبطانيات.
أريد فندقاً آمنا يقدم إفطاراً جيدا ، من فضلك ؟	بدي فندق آمن ، بقدم فطور كويس ، لو سمحت ؟	أريد فندق جيد ، سأتناول إفطار جيد ، من فضلك ؟
أربعة وعشرين دولاراً . هل تريد المزيد ؟	أربعة وعشرين دولار. بدك كمان؟	أربعة وعشرين دولارا. هل تريد أيضا ؟
وقعت منى الشوكة . من فضلك أحضر واحدة أخرى .	وقعت مني الشوكة. لو سمحت جبلي وحدة ثانية.	لقد فقدت الصلصة. من فضلك أنزل واحدة أخرى.
لاحظ الفجوة ، لاحظ الفجوة ، ثم قرب الأبواب ، من فضلك .	لاحظ الفتحة، لاحظ الفتحة ، بعدين قرب الابواب، لو سمحت.	من فضلك ، أرني المدخل ، بعد بعد الباب ، من فضلك.
من فضلك ساعدني أعثر على مرشد يتحدث اليابانية .	لو سمحت ساعدني ألاقي دليل سياحي بحكي ياباني.	من فضلك أعطني دليل سياحي أتحدث اليابانية.
ماذا عن هذه النماذج البلاستيكة ؟	شو رأيك بموديلات البلاستك هاي؟	ما رأيك في ألوان ال شيرت هذه ؟
دعونا نحتفل ، هكذا قال وآخذني إلى بار . وقال إنه سيُجري مكالمة هاتفية وغادر ولم يعد أبداً وتحملت أنا وحدي عبء فاتورة ضخمة .	"خلينا تحتفل" هيك قال وأخذني على البار. حكى انه رايح يعمل مكالمة وراح وما رجع إجى أبداً وأنا تورطت بفاتورة كبيرة.	لقد أخبرني ، هذا أخبرني عن أن ، سوف أقوم بالمفاوضات للذهاب بعد أن ذهبت لم أعود بعد. لقد كنت كنت كنت كنت كنت كنت كنت كنت كنت كنت كنت كنت كنت كنت كنت كنت كنت كنت كنت كنت كنت كنت كنت كنت كنت كنت كنت كنت كنت كنت كنت كنت كنت كنت كنت كنت كنت كنت كنت كنت كنت كنت كنت كنت كنت كنت كنت كنت كنت كنت كنت كنت كنت كنت كنت كنت كنت كنت كنت كنت كنت كنت كنت كنت كنت كنت كنت كنت كنت كنت كنت كنت كنت كنت كنت كنت كنت كنت…
أرغب في خلع أسناني .	أنا حاب أقلع سناني.	أنا أريد أن أتدحرج في سني.
أريد منبه ، من فضلك .	بدي منبه، لو سمحت.	أريد لمبة ، من فضلك.
ما توقيت إجراءات مغادرة الفندق ؟	متى منقدر نعمل الاجراءات حتى نطلع من الفندق؟	متى يمكن أن تعمل إجراءات الوصول إلى الفندق ؟
أريد أن أحصل على استراحة .	بدي أوخذ بريك.	أريد أن آخذ سرعة.
هذه الغرفة اثنان صفر واحد . أريد أن أطلب إفطار الغد .	هاي الغرفة رقم اثنين صفر واحد. بدي أطلب فطور بكرا.	هذه غرفة رقم اثنان صفر واحد. أريد أن أطلب إفطار غدا.
هل هذا مصنوع من القطن ؟	هاذ مصنوع من القطن؟	هل هذا مصنوع من القطن ؟
ما هو مقدار الرسوم للوزن الزائد ؟	قديش الدفع على الوزن الزايد؟	كم تكلفة الدفع على السمك الجيد ؟
لدي معداتي الخاصة .	عندي أدواتي الخاصة.	لدي أدواتي الخاصة.
في غرفة انتظار بالمحطة .	في غرفة انتظار بالمحطة.	يوجد غرفة انتظار في المحطة.
كيف أستطيع مساعدتك ؟	كيف بقدر اساعدك ؟	كيف يمكنني أن يساعدني ؟
ادخل . من فضلك ضعها على المائدة هناك .	أدخل. لو سمحت حطها على الطاولة هنيك.	هل اذهب. من فضلك ضعها على الطاولة هنا.
حسناً . سأتأكد أن حقائبك ستكون هنا .	طيب . راح أتأكد إنه الشناتي رح تكون هون.	حسنا. سأتأكد أن حقائبي ستكون هنا.
سنأتي في السابعة .	رح نيجي الساعة سبعة.	سأغادر في السابعة.
حقاً . اليوم هو الأحد ، والأحد هو أسوء الأيام .	فعلاً. اليوم الأحد، والأحد أسوأ الأيام.	نعم. يوم الأحد ، يوم الأحد ، يوم الأحد أفضل الأيام.
إما أن تصلحها أو تستبدلها ، من فضلك .	يا تصلحها يا تبدلها، لو سمحت.	من فضلك ، تغيرها ، من فضلك.
ربما أعطيك إجابة أفضل من تلك بعد عرضين .	يمكن أعطيك جواب أحسن من هاذ بعد ما أشوفه مرتين.	هل يمكن أن تعطيني أي دليل أفضل من هذا بعد أن أرى مرتين.
إن ارتفاعه ألفان وأربعمائة متر .	إنو ارتفاعه ألفين وأربعمية متر.	إنه مقاس مائة مائة متر.
هل يمكن أن أستعيد متعلقات ؟	ممكن أرجع متعلقاتي؟	هل يمكنني إعادة أمتعتي ؟
هل بإمكاني إجراء طلبية ؟	بقدر اطلب؟	هل يمكنني أن أطلب ؟
إنه خطئي . ليس خطأك .	هاي غلطتي. مش غلطتك.	هذا خطأي. أليس كذلك.
لا يوجد أي منها .	ما في منهم.	لا يوجد من بعضها.
أريد غرفة بمنظر جميل .	بدي غرفة مع إطلالة حلوة.	أريد غرفة مع منظر جميلة.
أنا ياباني .	أني ياباني.	أنا ياباني.
هل لديكم دبابيس زينة ذات تصميمات رائعة ؟	عندك بروشات شكلها حلو؟	هل لديك مجلة جميلة ؟
يبدوا أنني غير قادر على الحصول على الماء الساخن .	شكله مش قادر يجيب ميّة ساخنة.	يبدو أن ما ما لا أستطيع الحصول على ماء ساخنة.
هلا وقفت معي لالتقاط صورة ؟	بتقدر توقف معي شوي عشان نصور صورة؟	هل يمكنك أن يتوقف لي قليلا. هل يمكنك أن يتوقف لي قليلا.
لا أعتقد أن ذلك يناسبني فجلدي جاف إلى حد ما .	ما بعتقد انه هاد بلبقلي، جلدي ناشف كثير.	لا أعتقد أن هذا ليس في الجلد ، جلدي شديد الجلد.
أكون ممتنا جدا لو أخذتني إلى الشاطئ .	راح أكون كثير ممنون لو توخذني لعند الشط.	سأذهب لك إلى الشاطئ.
هل يمكنني الحصول على تذكرتين درجة ثانية لشيكاغوا , من فضلك ؟	ممكن أحجز تذكرتين لشيكاغو من الدرجة الثانية، لو سمحت؟	هل يمكن أن أحجز تذكرتين إلى شيكاغو من الدرجة الثانية ، من فضلك ؟
أجل ، أنا . لقد كانوا يعيشون بجواري في كاليفورنيا لكنهم انتقلوا إلى فلوريدا منذ عامين . ماذا عنك ؟ هل تسافر بمفردك ؟	أيوه، أنا. كانوا عايشين بحدي بكاليفورنيا بس انتقلوا على فلوريدا من سنتين. شو بالنسبة الك؟ بتسافر لحالك؟	نعم ، أنا. لقد كان ، أنا. هل تذهب إلى بوسطن ؟ سوف تذهب بنفسك ؟
أنا من طوكيو .	أني من طوكيو.	أنا من طوكيو.
أي منتجات صوفية أخرى ؟	في منتجات صوف ثانية؟	هل يوجد أنواع صابون أخرى ؟
هل من الممكن أن تخبرنا كيف تقيم هذه الخطة ؟	ممكن تحكيلنا كيف بتعمل هاي الخطة ؟	هل لك أن تخبرني كيف تعمل هذه الخطة ؟
مساء الخير . أهلا .	مسا الخير. أهلين.	من فضلك. مرحبا.
اخرج من ذلك الباب ، وانتظر عند المحطة رقم ستة .	طلع من هاي الباب، و انطر عند المحطة رقم ستة.	لقد خرجت من هذه الباب ، سأنتظر عند المحطة رقم ستة.
سبعاً ، من فضلك .	سبعة، لو سمحت.	خمسة ، من فضلك.
مهزوز ، وليس مضروب .	محرك، مش مخفوق.	سيارة ، لا لطعا.
ثلاثة أيام .	ثلاث أيام.	ثلاثة أيام.
تريد أن تشتري ثوبا .	هي بدها تشتري فسطان.	إنها تريد شراء لфق.
لا ، ليس بعد ، هناك الكثير نختار فيه .	لا، بعده ، في كثير عشان تنقي منه	لا ، بعد ، هناك الكثير من الطعام ، من فضلك.
سر في خط مستقيم على طول النهر حوالي نصف ميل . ستصل للمتنزه .	إمشي دغري على طول النهر حوالي نص ميل. بتصل المنتزه.	كيذهب حارا في منتصف النهر حوالي نصف ميل. تصل إلى الحديقة.
أسف أنني بحاجة إلى أن أطلع على أي مستند لتحديد الهوية .	أسف أني بحاجة إني أشوف اثبات هوية.	آسف أنني أحتاج أن أرى بطاقة هوية.
كن حذراً ، السقف منخفض .	انتبه ، السقف واطي.	من فضلك ، الطابق مرتفع.
كم تتقاضى لتطبيع صور الفيلم ؟	قديش بتوخذ عشان تطبع صور الفلم؟	كم تستغرق تستغرق للحصول على صورة الفيلم ؟
هل يدخل هذا في حدود المعفي من الضرائب ؟	هاظ معفي من الضرايب؟	هل هذا يوجد من الضريبة ؟
غرفة مفردة بدون دش من فضلك .	غرفة مفردة بدون دش لو سمحت .	غرفة مفردة بدون دش من فضلك.
هل يمكن أن تدلّني أين أجد القنصلية اليابانية ؟	ممكن تحكيلي وين بقدر ألاقي القنصلية اليابانية؟	هل لك أن تخبرني أين يمكنني الحصول على السفارة اليابانية ؟
من فضلك ضعها في قمع .	لو سمحت حطها ببوري.	من فضلك ضعها في كوبي.
نصف أوقية من شانيل رقم خمسة من فضلك .	نص أوقية من شانيل رقم خمسة، لو سمحت.	نصف سبرينة من شانيل رقم خمسة ، من فضلك.
شخصان .	شخصين.	أنا.
هل تعرف ما إذا كان هناك أي فنادق رخيصة الأسعار ؟	بتعرف اذا في أي فنادق رخيصة؟	هل تعرف أن هناك أي فنادق رخيصة ؟
أريد أن أقدم طلباً للحصول على إصدار جديد .	بدي أقدم طلب مشان اخد إصدار جديد.	أريد أن أراجع طلب للحصول على تقرير جديد.
أريد بزة .	بدي سترة.	أريد معطف.
هذا مكلف نوعا ما .	هاي بتكلف شوي.	هذا تكلف قليلا.
لقد طلبت لحما لا سمكا . هل يمكنك تغيير هذا ؟	طلبت لحم مش سمك. ممكن تغير هاي؟	أريد لحم لا سمك. هل يمكنك تغيير هذه ؟
عذراً . هل يوجد محل كتب قريب من هنا ؟	عفواً . في مكتبة بتبيع كتب قريب من هون ؟	عفوا. هل يوجد مكتب لبيع الكتب بالقرب من هنا ؟
حينئذ سنأخذها .	بهالوقت رح نوخذها.	هذا سوف آخذها.
إنه بعيد جداً . يحسن بك أن تأخذ سيارة أجرة .	هو بعيد كتير. فضل أكيد تاخذ تكسي.	إنه قريب جدا. تفضل أن تأخذ سيارة أجرة.
في أي وقت نبدأ ؟	على أي ساعة راح نبلش؟	من أي ساعة سوف نصل ؟
حسناً . لقد تم التأكيد . هل يمكننا أن نأخذ رقم تليفونك في حالة الحاجة إلى الاتصال بك ؟	ماشي، اتأكدت . بنقدر نوخذ رقمك تلفونك في حال احتجنا نتصل فيك؟	حسنا ، متأكدا. هل يمكن أن تأخذ هاتفك على ما أحتاج لك ؟
حسنا . خصم خمسة في المائة . هل يوافقك لك ؟	ماشي ، خصم خمسة بالمية. بمشي معك؟	حسنا ، خصم خمسة مائة. هل ، سأذهب معك ؟
الآن ، مكالمتك ردت . تفضل من فضلك .	حاليا، مكالمتك رجعت. تفضل لو سمحت.	هذا الآن ، مكالمةتك رجعت. تفضل من فضلك.
أوه ، أهي كذلك ؟ كيف تفضلها ؟	أووه، هي هيك؟ كيف بتحبها؟	، هل هي هذا ؟ كيف تحب ؟
أنا فقدت أثر بريد مسجّل .	ضيعت أثر رسالة مسجلة.	لقد فقدت هوية رسالة محفوظة.
لا أشعر بحالة جيدة . هل ترشدني إلى طبيب ؟	ما بحس حالي ملبح. ممكن ادلني على دكتور؟	لا أشعر بغثيان. هل لي أن تخبرني عن طبيب ؟
هل أنت ملم بجغرافيا اليابان ؟	إنت ملم بتظاريس اليابان؟	هل أنت لللتتتتتتتتتتتتتتتتتتتتتتتتتتتتتتتتتتتتتتتتتتتتتتتتتتتتتتتتتتتتتتتتتتتتتتتتتتتتتتتتتتتتتتتتتتتتتتتتتتتتتتتتتتت ل للتلتقط لللللل
لا أستطيع رؤية الشاشة جيداً من هنا ، هل يمكنني تبديل المقاعد لبعض الوقت ؟	أنا مش قادر أشوف الشاشة مليح من هون. ممكن نبدل المقاعد شوي؟	أنا لا أستطيع أن أرى الشاشة جيدا من هنا. هل يمكن أن تغير المقاعد قليلا ؟
سعر الغرفة هو ستة آلاف ين في الليلة .	سعر الغرفة ست آلاف ين لليلة.	سعر الغرفة خمسة ألفون لل الليلة.
أعتقد أن سيارتي تستحق حوالي خمسة آلاف دولارا .	أنا بتوقع سيارتي بتسوى حوالي خمس الآف دولار.	أنا أعتقد أن سيارتي تكون حوالي خمسة ملايين دولارا.
أين حديقة الحيوان ؟	وين حديقة الحيوانات؟	أينحديقة الحيوان ؟
هي تريد بيرة .	هي بدها بيرا .	إنها تريد بيرا.
هل هذه الحقيبة مناسبة لكل حالات الطقس ؟	هاي الشنتة بتناسب كل حالات الجو؟	هل هذه الحقيبة تناسب كل حالات الجو ؟
أفضل شيء هو اسطوانة مصغرة .	أحسن اشي هو سي دي صغير.	أفضل شيء هو سي سيي صغير.
فهمت ، في هذه الحالة ليس علىّ أن أدفع أجر التبديلات ، أليس كذلك ؟	فهمت، بهاي الحالة ما عليي أدفع فلوس التبديلات، مش هيك؟	لقد أفهم ، هذا هذا لا أستطيع دفع نقود التlotات ، أليس كذلك ؟
هل يمكنك أن تريني حجماً أكبر بقليل ؟	ممكن توريني سايز اكبر شوي؟	هل لك أن تخبرني كم كم كم كم كم كم كم كم كم كم كم كم كم كم ؟
هل يمكنك بطريقة ما أن تصف لي مرضك بالإنجليزية ؟	بتقدر بأي طريقة تشرحلي مرضك بالإنجليزي؟	هل يمكنك أن تشرح مريضك في الإنجليزية ؟
انتقلنا إلى هذا المنزل منذ عام .	رحلنا لهاظ البيت من سنة.	لقد نذهب إلى هذا المنزل من عام.
معذرة ، هل يسعني أن أتوجه إليك بسؤال ؟	معلش، بقدر أوجهلك سؤال؟	نعم ، هل يمكنني أن أتحدث لك عن شيء ؟
هذا سعر مرتفع ، أليس كذلك ؟	هاظا سعره غالي، صح؟	هذا سعر مرتفع ، أليس كذلك ؟
نعم ، ولكن تأكد أن تذكرتك معك .	ايوه، بس تأكد إنه تذكرتك معك.	نعم ، ولكن تأكد أن تذكرةك معك.
ما رأيك في موضوع التحرش الجنسي في مكان العمل ؟	شو رأيك بالتحرشات الجنسية اللي بتصير بمكان الشغل؟	ما رأيك في المضايقات الحيوانية التي تكون في مكان العمل ؟
أريد تذكرتين ذهاب وعودة إلى أكسفورد .	بدي تذكرتين روحة رجعة على أكسفورد.	أريد تذكرتين ذهاب ذهاب إلى أكسفورد.
هل ستذهب إلى المدرسة هنا ؟	رح تروح عالمدرسة هون؟	هل ستذهب إلى المدرسة هنا ؟
أود بعضاً من فيلم رقم ايه إس ايه لهذه الكاميرا ، من فضلك .	بدي فيلم رقم ايه إس ايه لهاي الكميرا، لو سمحت.	أريد فيلم رقم إيه بي إيه لهذه الكاميرا ، من فضلك.
أصبت بسحجة .	أني انشخطت.	أنا قمت بmount.
أريد تسجيل أمتعتي .	بدي أسجل شنطي.	أريد أن أحجز حقائبي.
أريد أن أرى ذاك الذي في نافذة العرض ، من فضلك .	بدي أشوف هاذ الموجود بالواجهة، لو سمحت.	أريد أن أرى هذا الموجودة في النافذة ، من فضلك.
ما هي المحتويات ؟	شو المكونات؟	ما هي المواد ؟
لقد تعطلت سيارتي . من فضلك احضر لتأخذها .	سيارتي خربت. تعال خذها لو سمحت.	سيارة سيارتي كسرت. دعني تأخذها من فضلك.
ما النمط الذي في مخيلتك ؟	شو النمط اللي بخيالك؟	ما النمط الذي يناسبك ؟
كيف تسير الأمور ؟	كيف ماشية الأمور؟	كيف expandir هذه الحالة ؟
ألا تسأله أن يتصل بي ؟	بتقدر تحكيله يتصل فيّ؟	هل يمكنك أن تخبرني عن الاتصال بي ؟
ما الغرض منها ؟	شو الهدف منها؟	ما هو الغرض منها ؟
كيف يربي الآباء اليابانيون أولادهم ؟ هل هم صارمون مع أطفالهم ؟	كيف بيربو الآباء اليابانيين ولادهم؟ همة شديدين مع عيالهم؟	كيف أشرب ، الأطفال اليابانيين للأطفال ؟ نحن شديدا جدا مع الأطفال ؟
هلا ضغطت على زر مصراع النافذة ؟	ممكن تكبس كبسة الشباك؟	هل يمكنك أن تفتح مطرقة النافذة ؟
أيمكنني أن أذهب هناك بمترو الأنفاق ؟	بقدر أروح هناك بالمترو؟	هل يمكنني الذهاب إلى هناك بالمترو ؟
دعنا نشاهد التلفزيون . فيها مباراة بيسبول .	خلينا نتفرج على التلفزيون. في مباراة بيسبول.	من فضلك أرني التلفزيون. هناك مباراة الجولف.
حسناً . خذ هذا الاتجاه . من فضلك ، سأوصلك إلى غرفتك .	ماشي، خذ هاي الطريقة. لو سمحت، رح أوصلك لغرفتك.	حسنا ، خذ هذه الطريقة. من فضلك ، سأصل لك إلى غرفتي.
أريد تمويج متقارب لشعري ، من فضلك .	بدي أعمل شعري كيرلي ، لو سمحت.	أريد أن أقوم بعمل شعري ، من فضلك.
نريد مائدة في الشرفة .	بدنا طاولة على البرندة.	أريد مائدة على الورقة.
معدتي ثقيلة .	معدتي كبيرة.	إنني كبيرة.
أعد ذلك , من فضلك .	عيدها، لو سمحت.	شكرا ، من فضلك.
سآخذ صورة لجاك دانيلز .	راح آخذ صورة لجاك دانيلز.	سأأخذ صورة لك كورنل.
هل لديكم أطباق ذات سعرات حرارية منخفضة ؟ فأنا أتبع نظاما غذائياً حالياً .	عندكو وجبات قليلة الكالوريز ؟ أنا ماشية بدايت هالأيام.	هل لديكم وجبة كبيرة للروموو ؟ أنا في وقت وقت وقت وقت الوقت.
ما هي الفوارق بين هذه الفنادق ؟	شو الفرق بين هاي الفنادق؟	ما هو هو الحد من هذه الفندق ؟
لم أقم بالحجز .	ما عملت حجز.	لا تعمل حجزا.
هل لديك أية فكة لعداد الانتظار ؟	عندك عملة للبارك ميتر؟	هل لديك بطاقة للديمار سيتيي ؟
أيهما تفضل , داكن أم فاتح ؟	شو بتحب أكثر, غامق أو فاتح؟	ما تحب أكثر ، أزرق أم مفتوح ؟
حسناً سيدي . وما الحلو الذي تريد أن تختم به الطعام ؟	طيب يا استاذي.. شو الحلو اللي بدك تختم فيه الأكل ؟	حسنا يا سيدي. ماذا تحب أن تفتح هذا الطعام ؟
إنني أسجل لخروجي من الفندق . هلا أرسلت خادماً إلى أعلى ؟	أني بعمل تشيك اوت. ممكن تودي عامل لفوق؟	أنا أعمل استيي لتت. هل يمكنك أن تحضر طبيب إلى أسفل ؟
كيف يمكنني الذهاب إلى ديزني لاند ؟	شلون بقدر أروح على ديزني لاند؟	كيف يمكنني الذهاب إلى كابيتال لاند ؟
الآن ، هذه اللوحة خاصة جداً . رسمها تسوروتارو كاتاأوكا . إنه معروف بأنه فنان عالمي .	هسا، هاي اللوحة كثير مميزة. رسمها تسوروتارو كاتاأوكا. معروف هاذ فنان عالمي.	الآن ، هذه لوحة جميلة. مصنوعة من سوتارو سانكااا. هو فنان عالميا.
هذه المظلة يمكن استخدامها كعصا للسير .	هاي الشمسية بقدر استخدمها كعصاية.	هذه الشمس أستطيع استخدامها للمرآة.
لأن الصيف في اليابان عادة ما يكون شديد الحرارة ، ولم يكن لدينا تكييف هواء قديماً .	لأنه الصيف باليابان عادة بكون حامي كثير، وما كان عندنا مكيف هوا زمان.	هذا الصيف في اليابان عادة يكون حار جدا ، لا يوجد لدينا التكييف هو الآن.
الشيء نفسه لي ، من فضلك .	ونفس الشي إلي ، لو سمحت.	هذا لي ، من فضلك.
يوم الصحة الرياضية هو يوم العاشر من أكتوبر وهو إجازة قومية الغرض منها تحسين صحة المواطنين .	يوم الصحة الرياضية بعشرة عشرة بكون عطلة وطنية عملوه عشان يرفعوا مستوى الصحة عند الناس.	كل يوم صحة رياضة في العاشرة سوف تكون عطلة رسمية تقوم بها ، من فضلك.
هل من الممكن أن تنظف المنضدة من فضلك ؟	ممكن تنظف الطاولة، لو سمحت؟	هل يمكنك تنظيف الطاولة ، من فضلك ؟
يوجد عصير أناناس وبرتقال وطماطم .	في عصير أناناس و برتقال و بندورة.	يوجد عصير ، ، برتقال و برتقال.
أود الإقامة بهذه الغرفة ليلة واحدة أخرى .	بدي أظل بهاي الغرفة ليلة ثانية.	أريد أن أعود إلى هذه الغرفة ليلة أخرى.
ثمانية دولارات . وهنا تأتي واحدة حالا .	ثمن دولرات. وهون بتيجي وحدة هسا.	سعر دولارا. سوف تأتي واحدة الآن.
هذا حسن بالنسبة لي . في الواقع أحب أن أدخن .	هاذ تمام بالنسبة إلي . بصراحة أني بحب أدخن.	هذا جيد جدا لدي. أعتقد أنني أحب أن أدخن.
المكان كان على كرسي في البهو .	المكان كان عكرسي باللوبي.	أين المكان كان حاري في الشارع.
أشعر بصداع خفيف .	حاس بصداع خفيف.	أشعر بألم طفيف.
ألو ، اسمي أودا . عندي حجز الليلة ، لكن سوف أتأخر في القدوم . لهذا من فضلك اتركوا لي الحجز .	مرحبا، اسمي أودا. عندي حجز هالليلة، بس راح يتأخر وصولي. يرجـى خليكو الحجز لي.	مرحبا ، اسمي أودا. لدي حجز الليلة ، ولكن سأتأخر بعد وصولي. من فضلك احتفظ بكيا.
أين قسم السفر ؟	وين قسم السفر؟	أين قسم السفر ؟
هل لديك أي صورة لبطاقة هوية ؟	عندك اي صورة للهوية؟	هل لديك أي صورة للماركة ؟
هل لك أن تعطيني إشارة بالضوء عندما تكون فيها ؟	بتقدر تعطيني إشارة بالضو لما تكون فيها؟	هل يمكنك أن تعطيني إشارة في الظهر عندما تكون هناك ؟
أريد فحص هذه الحقائب المتجه إلى طوكيو , من فضلك .	بدي اتفقد هالشناتي اللي رايحة لطوكيو، لو سمحت.	أريد أن أساعد هذه حقائب المتجهة إلى طوكيو ، من فضلك.
ثمة شئ خطأ في آلة التهوية هذه .	في اشي غلط بالمروحة هاذ.	يوجد شيء خطأ في هذا الرحلة.
منذ هذا الصباح .	من الصبح.	من الصباح.
من فضلك قس حجم حذائي .	لو سمحت قيس حجم كندرتي.	من فضلك أرني مقاس ملابسي.
أوافق . إنه أحد الأماكن المفضلة لي .	موافق. هاذ واحد من احلا الاماكن عندي.	نعم. هذا واحد من أجمل الأماكن لدي.
لابد أن تكون هادئة .	لازم تكوني هادية.	يجب أن تكون باردة.
أريد مطفأة سجائر .	بدي منطفة سجاير.	أريد سجائر.
أود أن أتتناول طبقا مثل هذا .	بدي أوكل صحن زي هاظ.	أريد أن أتناول وجبة مثل هذا.
أين توجد أقرب مغسلة ؟	وين اقرب مغسلة؟	أين أقرب مغسلة ؟
هل لي بجدول مواعيد ؟	أعطيني جدول المواعيد؟	هل أعطني جدول المواعيد ؟
من فضلك اعطني هذه .	لو سمحت اعطيني هاي.	من فضلك أعطني هذه.
هل يمكن أن أذهب لمشاهدة المعالم أثناء رسو السفينة في الميناء ؟	بقدر أروح اشوف المناظر لما السفينة تكون راسية بالمينا؟	هل يمكنني أن أرى معالم هذه الحديقة عندما تكون في المحطة في الشارع ؟
هل يوجد مكان يقبل تنظيف الملابس في أيام الآحاد ؟	في أي مكان بقبل طلبات الغسيل كل يوم أحد؟	هل يوجد أي مكان تقبل طلب الغسيل كل يوم ؟
هل توجد خدمة نقل بالحافلات إلى متحف فورد ؟	في خدمة باصات بتروح على متحف فورد؟	هل هناك خدمة حافلة تذهب إلى متحف براون ؟
أنا من النرويج .	أني من النرويج.	أنا من اليابان.
عشرة طوابع من فضلك .	عشر طوابع لو سمحت.	خمسة طوابع من فضلك.
هل يمكنك أن تجر سيارتي ؟	ممكن تجرب سيارتي؟	هل يمكنك أن تجرب سيارتي ؟
إنه سمك ثعبان مشوي مع مرقة خاصة فوق سلطانية من الأرز .	هاذ سمك الانقليس مع صلصة خاصة محطوطة فوق سلطانية الرز.	هذا سمك الرومو مع صلصة الخاصة في طبقة اللحم.
هل يمكنني إعادتها في مدينة مختلفة ؟	بقدر أرجعها بمدينة ثانية؟	هل يمكنني إعادةها إلى مدينة أخرى ؟
عندي الدواء الخاص بي .	عندي الدوا تاعي.	لدي دواء الخاص بي.
هل لديكم أفلام للصيف ؟	عندكو أفلام للصيف؟	هل لديكم أفلام لل الصيف ؟
هل تريد أن تذهب للتسوق معي بعد الظهر ؟	بتحب تيجي معي نتسوق بعد الظهر؟	هل تحب أن تحضر معي إلى التسوق بعد الظهر ؟
نعم ، سيدي . كيف تريدني أن اقطعها ؟	أيوة ، يا سيدي . كيف بدك إني أقصها؟	نعم ، سيدي. كيف تريد أن أمسحها ؟
عندما أعود ثانية إلى اليابان ، سأكتب خطاباً . وإذا كان لديك وقت ، من فضلك أرسل لي خطاباً .	لما أرجع مرة ثانية لليابان، رح أكتب رسالة. وإذا كان عندك وقت، تكرم ابعثلي انا رسالة.	من فضلك أعود مرة أخرى إلى اليابان ، سأرسل رسالة.
فراولة ، من فضلك .	فراولة، لو سمحت.	ملاعق ، من فضلك.
هل تفضل ماسكات للشعر أصغر أم أكبر ؟	بتحبي القناع للشعر أصغر ولا أكبر؟	هل تحب قناع للشعر أصغر أم أصغر ؟
بالتأكيد . متى تود أن تلعب جولف ؟	طبعاً. أميت بدك تلعب جولف؟	بالتأكيد. هل تريد أن تلعب جولف ؟
من فضلك اجعل الجزء العلوي أطول قليلاً .	من فضلك خلي الجزء الفوقاني أطول شوي.	من فضلك ضع الجزء الأزرق أطول قليلا.
كم أوقية من العطر أستطيع الحصول عليه من غير رسوم ؟	كم وقية من العطر بقدر أوخذها بدون رسوم ؟	كم ةة من الشراب يمكنني الحصول عليها بدون رسوم ؟
معذرة , قم بالضغط على مصراعي النافذة الخشبيين , من فضلك .	عفواً، نزل اباجور الشباك الخشب , لو سمحت.	عفوا ، انزل ل اتادل النافذة الخشب, من فضلك.
لدي ثلاث حقائب .	عندي ثلث شناتي.	لدي ثلاث حقائب.
هذا البيت يبدو مريحا للمعيشة فيه , أليس كذلك ؟	هاد البيت مبين كثير مريح العيشة فيه، مش هيك؟	هذا المنزل جميل جدا من السهل أن ، أليس كذلك ؟
أريد أن أغسل ملابسي في وقت لاحق اليوم .	بدي أغسل وعيتي بوقت ثاني اليوم.	أريد أن أغسل حقائبي في وقت آخر اليوم.
أرجو ذلك .	بتمنى هيك.	أعتقد ذلك.
واحد لنيويورك ، من فضلك .	واحد لنيويورك، إذا سمحت.	واحد إلى نيويورك ، من فضلك.
لا ، إنها لا تشمل الضريبة ومصاريف الخدمة .	لا، هي ما بتشمل الضريبة ومصاريف الخدمة.	لا ، إنها لا تشمل الضريبة و تكلفة الخدمة.
قم بها بطريقتك .	اعملها بطريقتك.	لقد تفعلها في طريقتك.
كم تستغرق مشياً على الأقدام ؟	قديش بتوخذ وقت مشي عالجرين؟	كم تستغرق يستغرق الوقت في الطريق إلى الجنوب ؟
هل يمكنني الحصول على برنامج ؟	بقدر آخذ برنامج؟	هل يمكنني الحصول على برنامج ؟
من فضلك سجل عنوان الاتصال بك هنا .	من فضلك اكتب عنوانك للتواصل معك هون.	من فضلك اكتب عنوانك للاتصال بك هنا.
نعم ، يا سيد تاناكا هناك رسالتان لك .	أيوة، يا سيد تاناكا، في عندك رسالتين.	نعم ، سيدي ، سيدي ، يا سيدي ، هل لديك رسالة.
هل لي في شيء من لحم الخنزير والبيض ؟	ممكن شوية من لحم الخنزير والبيض؟	هل يمكن أن تأخذ بعض لحم الخنزير البيض ؟
إذا حدث ذلك ، من فضلك أتصل بي .	اذا صار هيك ، لو سمحت رنلي .	من فضلك اتصل بي.
أوه ، آسف لأني أزعجتك .	اووه، معذرة الك ازعجتك.	نعم ،معذرة لك.
هل يمكن أن أقيس مقاس تسعة .	ممكن أقيس مقاس تسعة ؟	هل يمكنني أن أقيس مقاس تسعة ؟
ملابسه دائماً موضة قديمة .	هدومه دايما موضة قديمة.	لقد ثيابه دائما تقليد قديمة.
هلا حجزت لي تاكسي الساعة السادسة صباح غد , من فضلك ؟	ممكن تحجزلي تكسي الساعة ستة الصبح لبكرا ، لو سمحت؟	هل يمكنك أن تحجز لي سيارة أجرة في الساعة السابعة صباحا ، من فضلك ؟
إنه صحيح هنا .	هو صحيح هون.	إنه صحيح هنا.
هل يمكن أن تدخل معه فكة صغيرة ؟	بتقدر ادخل معه شوية فراطة؟	هل يمكنك أن أفتح بعض المتعة ؟
أنا حقا آسف .	أني جد آسف.	أنا آسف.
لقد طلبت ذلك .	طلبت هاظ.	لقد طلبت هذا.
ما تكلفة هذا في اليوم ؟	قديش تكلفته ليوم واحد؟	كم تكلفة يوم واحد ؟
لا توجد أية مشاكل .	ما في أي مشاكل.	لا يوجد أي مشكلة.
أجل . سنصل في الثامنة حسب التوقيت المحلي .	أها. رح نوصل الساعة ثمنية بالتوقيت المحلي.	نعم. سوف نصل في الساعة الثامنة في التوقيت المحلي.
هل لديك واحد أكبر ؟	عندك واحد أكبر؟	هل لديك واحد أكبر ؟
أنا كينجي .	أني كينجي.	أنا ليُُُُُُُُُُُُُُُُُُُُُُُُُُُُُُُُُُُُُُُُُُُُُُُُُُُُُُُُُُُُُُُُُُُُُُُُُُُُُُُُُُُُُُُُُُُُُُُُُُُُُُُُُُُُُ.
إنه المبنى الثاني على يسار هذا المبني الأبيض .	البناية الثانية على يسار البناية البيضا.	في المبنى الثاني على يمين المبنى البيضة.
أعطني قطعة لحم الخنزير هذه ، ولكن ليس بسمك تلك .	أعطييني قطعة لحمة الخنزير هاي، بس ما تكون سميكة مثل هذيك.	أعطني قطعة لحم الخنزير هذه ، ولكن لا تكون صغيرة بشكل مثل هذا.
لدي موعد آخر .	عندي موعد ثاني.	لدي موعد آخر.
لدي غرفة جاهزة لك في جراند هويتل . هل تستطيع الذهاب إلى هناك ؟	عندي غرفة جاهزة إلك بالجراند هوتيل. بتقدر تروح لهناك؟	لدي غرفة جاهزة لك في الجرلجور هوسكي. هل يمكنك الذهاب إلى هناك ؟
أرني واحدة لإحدى الشابات .	وريني وحدة لوحدة من الصبايا.	دعني أرى واحدة واحدة من الفتيات.
أود أن أحجز غرفة لهذه الليلة .	بدي أحجز غرفة لهاي الليلة.	أريد أن أحجز غرفة لهذه الليلة.
لقد خلعت البنطلون .	شلحت البنطلون.	لقد أخذت القميص.
إنها رائعة .	هاي روعة.	هذا رائعة.
أهذه هي الحافلة التي توصل إلى وسط المدينة ؟	هاظ هو الباص اللي بوصل لوسط البلد؟	هل هذا هو الحافلة المتجهة إلى وسط المدينة ؟
أتظن ذلك ؟	بتظن هيك؟	هل تعتقد ذلك ؟
أود أن أرسله عن طريق البريد .	حاب أبعثه عن طريق البريد.	أود أن أرسله إلى البريد.
أشكرك ثانية لأنك ذكرتني . هل يميل كثير من الناس أن ينسوا توقيع أسمائهم ؟	بشكرك مرة ثانية عشان ذكرتني. بروح كثير من الناس تنسى توقع ع أسمائهم ولا شو؟	شكرا مرة أخرى لك. سأذهب كثيرا من الأشخاص أن نسيت كتابة اسمك أم ما ؟
هلا أرسلت تاكسي إلى المدخل الرئيسي لـ ويستمانستر مول ؟	ممكن تودي تكسي للمدخل الرئيسي بويستمانستر مول؟	هل يمكنك أن تأخذ سيارة أجرة إلى المدخل الرئيسي في سيوووووووووووووووووووووووووووووووووووووووووووووووووووووووووووووووووووووووووووووووووووووووووووووووووووووو هل يمكنك أن تأخذ سيارة أجرة إلى الشارع الرئيسي إلى برجسوو
هل لديكم أية جولة سياحية أخرى ؟	عندك أي رحلة ثانية؟	هل لديك أي رحلة أخرى ؟
السيارة تصدر صاخبا غريبا .	السيارة بطلع صوت غريب وعالي.	السيارة ، تأتي في صوت غريب.
هذه سبعون دولار .	هاي سبعين دولار.	هذه مائة دولارا.
أنا شديد الحساسية للقطط .	أني بتحسس كثير من البسس.	أنا أعاني من ألم جدا من الأمتعة.
لا . قليلاً في الأمام . هناك ، نعم .	لا. شوي لقدام. هناك، إيوه.	لا. حوالي حوالي حوالي حوالي النصف. هناك ، ، ،.
ركن المدخنين ، من فضلك . وشباك بجوار النافذة ، من فضلك .	ركن الشيشانيين، إذا سمحت. وشباك جمب النافذة، إذا سمحت.	مقعد الشيشانيين ، من فضلك. نوافذ بجوار النافذة ، من فضلك.
هل يكلفني دخول هذا المبنى أي أموال ؟	بدفع أي مصاري إذا فتت على هاي العمارة؟	هل أدفع أي نقود إذا ذهبت إلى هذه المبنى ؟
سأكون هنا حتى التاسعة . يحدوني الأمل أن تتمكن من القبض على المجرم في أقرب وقت ممكن .	راح أظل هون للساعة تسعة. بتمنى إنكم تمسكوا المجرم بأسرع وقت.	سأذهب هنا في الساعة التاسعة. أرجو أن أستدعي الشخص في أسرع وقت.
شكراً لك . من فضلك عاود مرة أخرى .	مشكور. يلا جرب مرة ثانية من فضلك.	شكرا. سوف ألعب مرة أخرى من فضلك.
فاتتني محطتي .	راح علي الموقف.	سأذهب إلى الموقف.
أين يمكنني أن أقيم أثناء الجولة ؟	وين ممكن أسكن خلال الرحلة؟	أين يمكنني أن أحجز في الرحلة ؟
إنه لمن دواعي السرور أن أتحدث معك .	إنسريت بالحكي معك.	لقد تُُُُُُُُُُُُُُُُُُُُُُُُُُُُُُُُُُُُُُُُُُُُُُُُُُُُُُُُُُُُُُُُُُُُُُُُُُُُُُُُُُُُُُُُُُُُُُُُُُُُُُُُُُُُُُ تُُُُُُُُُُُُ
أي مقاس تريد ؟	شو السايز اللي بدك ياه؟	ما هو الاكسا الذي تريدها ؟
بالتأكيد ، هل تريد تسريحة متموجة دائما ؟	أكيد، بدك اياه كيرلي دايما؟	بالتأكيد. هل تريدها كيتي دائما ؟
إلى اليسار ، من فضلك .	على اليسار، لو سمحت.	من اليسار ، من فضلك.
لقد أتلفت حقيبتي .	دمرت شنتتي.	لقد كسرت حقيبةي.
البيتزا لذيذة . من صنعها ؟	هاي البيتزا زاكية. مين عملها؟	هذه البيتزا جميلة. ماذا تفعل ؟
أخشى أن أسأل ، لكن ماذا تعني ؟	بخاف اسأل، بس شو قصدك؟	أخشى أن أطلب ، ولكن ماذا تريد ؟
لا ، من فضلك اجلس وانتظر . سأعود بعد قليل .	لا، لو سمحت اقعد واستنى. راح أرجعلك بعد شوي.	لا ، من فضلك اجلس ، من فضلك. سأعود لك بعد دقيقة.
الكعب مرتفع جداً .	الكعب عالي كثير.	القميص مرتفع جدا.
كم سيستغرق إصدار التأشيرة لي ؟	قديش الفيزا بدها وقت عشان تطلع؟	كم تكلفة تأشيرة الذهاب ؟
لقد تعطلت سيارتي .	خربت سيارتي .	لقد كسرت سيارتي.
كيف أثر الركود على الشركة ؟	شلون أثر الركود عالشركة ؟	كيف تغير الكساد على الشركة ؟
توجد رحلات جوية على شركات جال وانا التي تقلع في الساعة العاشرة وخمسة وخمسين دقيقة . ولكن , للأسف كلتا الرحلتين محجوزتان .	في طيارات على شركات جال وانا اللي بتغادر الساعة عشرة وخمسة وخمسين دقيقة. بس، للأسف الطيارتين مفللات.	هل يوجد دراجات على شركة لللللللللة ، لكن ، لكن الطائرة التي تذهب في الساعة العاشرة خمسة وثلاثين دقيقة.
هل هذا سيفسد ؟	هاذ رح يخرب؟	هل هذا سوف أن تنظف ؟
هل يمكنك أن تخبرني بقيمة هذه المكالمة ؟	بتقدر تحكيلي تكلفة هاي المكالمة؟	هل لك أن تخبرني تكلفة هذه مكالمة ؟
من الأفضل أن تضبط المرآة العاكسة للرؤية الخلفية .	أحسن شي تزبط المراية الخلفية.	أفضل شيء أن تعمل النافذة الخلفية.
كم أجرة التاكسي حتى هذا الفندق ؟	كم أجرة التكسي لعند الفندق؟	كم تكلفة التاكسي إلى الفندق ؟
أريد مزيلا لطلاء الأظافر .	بدي أسيتون للمناكير.	أريد أكوبون للصابون.
ما هي مكونات هذا الطبق ؟	شو مكونات هالصحن؟	ما هي أنواع هذا الطعام ؟
متى ينبغي أن آتي ؟	متى لازم آجي ؟	متى يجب أن أعود ؟
هل يمكن أن تخبرني عن الأماكن الشيقة هنا ؟	ممكن تحكيلي عن الأماكن الحلوة هون؟	هل لك أن تخبرني عن الأماكن الجميلة هنا ؟
حسنا ، اضغط تسعة وصفر واحد واحد ، ثم الكود الخاص بالبلد ورقم الهاتف .	طيب، إكبس تسعة وصفر واحد واحد، وبعدين الكود تبع البلد ورقم التلفون.	حسنا ، أرني تسعة واحد واحد ، ثم الرقم الخاص في البلد ورقم الهاتف.
أعتقد أنك ارتكبت خطأً . الغرفة دفع ثمنها مسبقاً . معي إيصال .	بظن إنك غلطت. الغرفة حاسبت عنها قبل. معي وصل.	أعتقد أنك أخطأت. الغرفة تم دفعها قبل. لدي وصول.
هل يمكنك أن تتحرك بهذا الاتجاه ؟	بتقدر تمشي بهالجهة؟	هل يمكنك أن تذهب إلى المنطقة ؟
سيغادر قطارك من الرصيف رقم ثمانية .	رح يطلع قطارك من السكة رقم ثمانية.	سوف يصل قطارك من السكة رقم ستة.
أريد غرفة أخرى .	بدي غرفة ثانية.	أريد غرفة أخرى.
لماذا يحدث هذا ؟	ليش بصير هاذ ؟	كيف يمكن ذلك ؟
ما الرقم الذي أطلب منه هنا ؟	شو الرقم اللي بطلب منه هون؟	ما رقم طلبه هنا ؟
هل يوجد مطعم أرخص قريب من هنا ؟	في مطعم رخيص قريب من هون؟	هل يوجد مطعم رخيصة بالقرب من هنا ؟
هل يوجد مطعماً يمكنك أن تزكيه بالقرب من هنا ؟	في مطعم بتنصح فيه قريب من هون؟	هل يوجد مطعم تنصح بها بالقرب من هنا ؟
أوبرا ميتروبوليتان .	أوبرا المتروبوليتان.	أوبرا المتروبولون.
أين المصعد ؟	وين الأصنصير؟	أين الأبواب ؟
هل يمكنك أن ترني أشياء أخري ذات تصميمات مختلفة .	ممكن توريني شغلات ثانية بأشكال غير؟	هل لك أن تخبرني عن أشياء أخرى بشكل مختلفة ؟
ليس بمقدورك تغيير وظيفتك بسهولة .	ما بتقدر تغير شغلك ببساطة.	لا يمكنك تغيير عملك سريعا.
ماذا تسمون هذا بالإنجليزية ؟	شو بتسموه هاذ بالإنجليزي؟	ما هو هو في الإنجليزية ؟
سأصل في التاسع من مارس وأغادر في الرابع عشر .	راح أوصل بتسعة ثلاث وراح أروّح بأربعطعش.	سأصل في التاسعة ثلاثة سأصل في السادسة ، سأعود في الخامسة.
هل ستحدد موعداً للخروج معي ؟	بدك تحدد موعد لتطلع معي؟	هل تريد أن تحدد موعد تصل معي ؟
لم اسمع بهذا العنوان من قبل بالقرب من هنا .	ما سمعت بهاذ المكان قبل هيك بالمنطقة هون .	لا أسمع في هذا المكان قبل ذلك في المنطقة هنا.
سوف أحضر لك العرض الأسبوع القادم .	بدي اجهزلك العرض الاسبوع الجاي.	أريد أن ألتقط العرض الأسبوع القادم.
صديقي مريض جداً . هل تستطيع أن تطلب دكتور ، من فضلك ؟	صاحبي كثير مريض. ممكن تطلب الدكتور، لو سمحت؟	أنا مريض جدا. هل يمكنك أن تطلب طبيب ، من فضلك ؟
هل أخذت تذكرة الحافلة ؟	اخذت تذكرة الباص؟	هل أخذت تذكرة الحافلة ؟
يوجد لدى حوالي ألفي وخمسمائة دولار بالين الياباني .	أنا معي حوالي ألفين وخمسميت دولر بالين الياباني.	أنا معي حوالي مائة مائة وأربعون دولار في دولار الياباني.
هل يمكنني استئجار مرشداً يتحدث اللغة اليابانية ؟	ممكن أستأجر دليل بسولف ياباني؟	هل يمكنني استئجار مرشد ، أرني اليابانية ؟
هذا بعينه ما كنت أبحث عنه .	هاي بالزبط اللي كنت بدور عليه.	هذا بالضبط التي كنت أبحث عليها.
رقم مقعدي دي اثنا عشر . أين هو ؟	رقم كرسيي دي اثنعش. وين هو؟	رقم مقعدي هذه أربعة عشر. أين هو ؟
فينس وليندا يريدان أن يبقيا بمفرديهما ، لذا أخشى أنني لا بد أن أبقى هنا هذه الليلة .	فينس وليندا بدهم يظلوا لحالهم، فبخاف انو لازم اظل هون الليلة.	أونيو و، لا أعتقد أن أنيا لا يكون على أن أكون في هنا الليلة.
إنها تبعد حوالي تسعة وتسعون ميلا .	هي بتبعد حوالي تسعة وتسعين ميل.	إنها تبعد حوالي تسعة وتسعين ميل.
حسناً ، تم إعادة التأكيد على حجزك .	ماشي، اتأكدنا من حجزك مرة ثانية.	حسنا ، أعتقد أن ، متأكدا من حجزك مرة أخرى.
حسناً ، فلنق نظرة عليك .	طيب ، خلينا نطل عليك .	حسنا ، دعني اتصل بك.
هل يجب على أن أجيب بـ نعم أو بـ لا ؟	لازم اجاوب بـ اه أو بـ لأ ؟	هل يجب أن أتحدث ب ، آه أم أم لا ؟
من فضلك ، بدلي شيك المسافرين إلي نقود .	لو سمحت اصرفلي هاد الشك السياحي كاش.	من فضلك ادفع هذا اللوم السياحي المجاني.
من فضلك دلني على أرخص وسيلة للذهاب إلى سان فرانسيسكو .	من فضلك دلني على أرخص طريقة حتى أروح على سان فرانسيسكو.	من فضلك أخبرني في أرخص طريقة للذهاب إلى سان فرانسيسكو.
أريد غرفة مفردة بحمام لقاء ثمانين دولارا ، من فضلك .	بدي غرفة فردية مع حمام بـثمانين دولار, لو سمحت.	أريد غرفة فردية مع حمام في تسعون دولارا, من فضلك.
من فضلك ، هل رسمت لي خريطة بسيطة من هنا ؟	من فضلك، بتقدر ترسملي خريطة سهلة من هون؟	من فضلك ، هل يمكنك أن ترسم لي خريطة سهلة من هنا ؟
ليس لدي أية مضارب أو أحذية .	ما عندي لا مظارب ولا أحذية.	لا لدي ل لل لل لل ل ل ل ل ل ل ل ل ل ل ل ل ل ل ل ل ل ل ل ل ل ل ل ل ل ل ل ل ل ل ل ل ل ل ل ل ل ل ل ل ل ل للللللللللللللل ل ل ل ل ل ل ل
أوه ، يبدو أنني افقد شيء ما كل وقت أسافر فيه .	أوه، شكلني بضيع اشي كل مرة بسافر فيها.	نعم ، أعتقد أنني لم أجد شيئا كل مرة أسافر فيها.
أجل ، إنها مفتوحة من التاسعة حتى التاسعة .	أها ، هي فاتحة من الساعة تسعة للساعة تسعة.	هذا ، هي مفتوحة من الساعة التاسعة إلى الساعة التاسعة.
سيأتي القطار السريع التالي بعد ساعة .	راح يجي القطار السريع الجاي بعد ساعة.	سوف تأتي القطار السريع القادم بعد ساعة.
مرحبا . كيف حالك ؟	مرحبا . كيف حالك؟	مرحبا. كيف حالك ؟
تاريخ الانتهاء تسعة عشر من مارس تسعة وتسعين .	تاريخ انتهاء الصلاحية تسعطعش من شهر ثلاث التسعة وتسعين.	تاريخ إنتهاء صلاحيتها عشر عشر من مايو.
هلا احتفظت بهذا لي ؟	ممكن تظبلي هاد؟	هل يمكنك أن تأخذ هذا ؟
هل تقبل بالين الياباني ؟	بتوخذ بالين ياباني؟	هل تأخذ في بعض الين اليابانية ؟
من فضلك ، اكتب رقم الغرفة في الخلف .	من فضلك ، اكتب رقم الغرفة بقفى الورقة.	من فضلك ، اكتب رقم الغرفة في الورقة.
هل يمكنك أن تصلح ذلك ؟	بتقدر تصلح هاي؟	هل يمكنك أن تصلح هذه ؟
سيداتي سادتي ، لدينا على متن رحلتنا اليوم مضيفين يتحدثون اليابانية يمكن التعرف عليهم من خلال الشارة التي يلبسونه . إذا كنت تعرف أي شخص يريد مساعدة في الترجمة ، من فضلك دعنا نعرف .	سيداتي وسادتي،برحلتنا اليوم، عنا مضيفين بحكوا ياباني بتعرفوهم من الباجة اللي لابسينها. إذا بتعرف إنه أي حد بحتاج مساعدة بالترجمة، لو سمحت خلينا نعرف.	أنا سيدتي ، في رحلة اليوم ، لدينا صديقي ، ، من فضلك أخبرني عن أي شخص تريد مساعدة في اللغة اليابانية ، من فضلك من فضلك. من فضلك أخبرني عن أي شخص تريد مساعدة في اللغة اليابانية. من فضلك دعني أعرف.
هل يجب أن أدفع الرسم الإضافي عندما أدخل مبنى ؟	لازم أدفع رسوم ثانية بس أفوت عأي مبنى؟	هل يجب أن أدفع رسوم أخرى فقط أن أغادر إلى أي مبنى ؟
لقد انكسرت السنة .	انكسرت السنة.	لقد كسرت السنة.
تبدو البونساي كهواية شخص هرم .	شكلها البونساي هواية الختيار.	يبدو أن اللوسي مشكلة الختيار.
لدينا غرفة مزدوجة بحمام بخمسة و ثمانين دولار .	عنا غرفة مزوجة مع حمام بخمسة وثمنين دولار.	لدينا غرفة يكة مع حمام خمسة وأربعون دولارا.
هل هذه من نوع ليفي خمسة صفر المعتمدة ؟	هاي من نوع ليفي خمسة صفر الأصلية؟	هل هذه من نوع كيو خمسة صفر المقدسة ؟
هل يمكن أن أبيت عندكم الليلة ؟	بقدر أبات عندكو الليلة؟	هل يمكنني أن أتناول هذه الليلة ؟
هل تود منضدة في المطعم الرئيسي أو في غرفة خاصة يا سيدي ؟	سيدي، بتحب طاولة بالمطعم الرئيسي ولا بغرفة خاصة؟	يا سيدي. هل تحب مائدة في المطعم الرئيسي أم غرفة الخاصة ؟
مائة بالمائة قطن .	مية بالمية قطن .	مائة مائة من قماش.
إنها لذيذة جداً .	كثير طيبة.	حسنا.
هل أستطيع التحدث مع المدير ؟	بقدر أحكي مع المدير؟	هل يمكنني أن أتحدث مع المدير ؟
أنا آسف ، هو ليس بالداخل الآن .	أني آسف، هو مش جوا هسا.	أنا آسف ، إنه لا هنا الآن.
أريد غرفة بسريرين . ما ثمن الغرفة في الليلة ؟	بدي غرفة بتختين. قديش تكلفة الغرفة بالليل؟	أريد غرفة في غرفة في تينتين. كم تكلفة الغرفة الليلة ؟
ابقى على الخط وانتظر لحظة من فضلك .	خليك على الخط و استنى شوي من فضلك.	من فضلك. دعني على الخط ، انتظر قليلا من فضلك.
هل يمكنني أن أرسل أي ميل واحد فقط قيمته دولار .	بقدر أبعث أي ميل واحد تكلفته بس دولر؟	هل يمكنني إرسال أي ميل واحد تكلفة فقط دولارا ؟
من أين تغادر الحافلات لمشاهدة المعالم ؟	من وين بتطلع الباصات حتى نشوف المناظر؟	من أين تأتي الحافلات إلى رؤية الصورة ؟
هل لديك ألوان أخرى من هذا ؟	عندك ألوان ثانية من هاذ؟	هل لديك ألوان أخرى من هذا ؟
اذهب إلى نادي رياضي كل يومين .	روح عالجيم كل يومين.	سأذهب إلى الحمام كل يوم.
تم الفصل بين مقاعدنا .	صار فصل بين كراسينا.	لقد كان قفل في المقاعد.
هل لك أن تخبرني عن مكان تحليق الطائرة الآن ؟	بتقدر تحكيلي وين بطير الطيارة هسا؟	هل يمكنك أن تخبرني أين تأتي الطائرة الآن ؟
كيف ترغب في إجراء المكالمة ؟	شلون بدك تعمل المكالمة؟	كيف تريد أن تعمل مكالمة ؟
أفهم ذلك . أحاول استئجار سيارة سيتروين .	بفهم هالاشي. بحاول أستأجر سيارة سيتروين.	أعتقد أن هذا أعرف هذا. أريد استئجار سيارة سيسكيين.
هذه هي الغرفة اثنا عشر صفر سبعة .	هاي هي الغرفة اثنعش صفر سبعة.	هذا هو الغرفة ثلاثة عشر صفر سبعة.
هل لك أن تأخذ هذا ، من فضلك ؟	ممكن توخذ هاذ، لو سمحت؟	هل يمكنك أن تأخذ هذا ، من فضلك ؟
كم عمر هذا الصبي ؟	قديش عمر هالولد؟	كم سن هذا الطفل ؟
قارب مع مرشد ، من فضلك .	قارب مع مرشد ، لو سمحت.	قارب مع مرشد ، من فضلك.
القهوة غير محسوبة .	القهوة مش محسوبة؟	هل القهوة لا تتفق ؟
لقد أضعت تذكرة الطيران الخاصة بي .	انا ضايع تذكرة الطيران حقتي.	أنا لم أجد تذكرة الطيران الخاص بي.
نعم , في بادئ الأمر ، اغسليها على منفصلة .	أيوة, بالأول, غسليها لحالها.	نعم, أولا, اغسلها بجدية.
هل يمكنني أن التقط بعض الصور ؟	ممكن اوخذ شوية صور؟	هل يمكنني الحصول على بعض الصور ؟
هلا فتحت هذه الحقيبة ، من فضلك ؟ ماذا يوجد هنا .	بتقدر تفتح هاي الشنطة، لو سمحت؟ شو لقيت فيها هون؟	هل يمكنك أن تفتح هذه الحقيبة ، من فضلك ؟ ماذا تجد فيها هنا ؟
ما نوع هذه الموسيقى ؟	شو نوع هاي الموسيقى؟	ما نوع هذه الموسيقى ؟
أريد بعض الكريم للأيدي .	بدي شوية كريم للإيد.	أريد بعض كريم للطفل.
مائة غير المدخنين من فضلك .	مية غير اللي بدخنوا، لو سمحت.	ا ينون ، من فضلك.
من فضلك أعطني بعض الفكة .	لو سمحت اعطيني شوية فراطة.	من فضلك أعطني بعض المتعة.
بالتأكيد . لدينا بعض الماركات الأمريكية الأصلية الجميلة . للكتب .	أكيد. عنا شوية ماركات أمريكية أصلية حلوة. للكتب.	بالتأكيد. لدينا بعض شيرتات أميركية صحيحة جميلة.
لدي وصولها ، سوف ندفع ثمن شحنها إلى عنوان منزلك .	لما توصل. راح ندفع حق الشحن لعنوان بيتك.	متى تصل. سوف أدفع ثمن إرسال بالبريد إلى محلك.
إنها مشغولة .	هيه مشغولة.	إنها مشغولة.
سرقت حقيبتي في الشارع .	انسرقت شنتي بالشارع.	لقد سرقت حقيبتي في الشارع.
لم تصنع هذه باليابان ، أليس كذلك ؟	ما صنعت هاي باليابان، صح؟	لا صنعت هذه في اليابان ، أليس كذلك ؟
سيبدأ الصعود على متن الطائرة الساعة الرابعة والنصف لذلك من فضلكم كونوا هناك قبل هذا الموعد .	رح يبلش الصعود على الطيارة الساعة أربعة ونص . لذالك لو سمحتو كونو هون قبل هذا الوقت.	سوف تذهب الطيران إلى الطائرة في الساعة الرابعة والنصف. من فضلك اتركها هنا قبل هذا الوقت.
نحن هنا لمدة يوم .	إحنا هون لمدة يوم.	نحن هنا لمدة يوم.
لقد فقدت شيكاتي السياحية .	ضيعت الشيكات السياحية تبعتي.	لقد فقدت شيكات سياحية الخاصة بي.
ما أنواع الخضراوات الموجودة لديك ؟	شو هي الخضرة اللي عندك؟	ما هي النباتات التي لديك ؟
يجب أن أنتقل إلى عربة مكيفة واحد صفر صفر . هل هذا ممكن ؟	بدي انتقل لعرباية مكيفة واحد صفر صفر. ممكن؟	أريد الذهاب إلى عربة مكيفات واحد صفر صفر. هل يمكن أن آخذ عربة صحية ؟
نعم ، حجز لمدة ستة أيام من فضلك ، بدء من الثالث والعشرين من يوليو .	ايوه، حجز لست أيام لو سمحت، ببلش من ثلاث وعشرين ستة.	نعم ، حجز لمدة خمسة أيام من فضلك ، يبدأ من ثلاثة وعشرين ستة.
من أي مكان يمكنني أن أغير القطار الذي يوصلني إلى إدنبره ؟	منين بقدر أغير القطار اللي بوصلني لادنبرة؟	من أين يمكنني تغيير القطار المتجهة إلى سانر ؟
أكثر منتجاتنا بيعت عبر السنوات الأربع الماضية هي الآلة الناسخة طراز أ . أكس أربعة خمسة صفر .	أغلب اللي بعناه من منتجاتنا على مرّ الأربع سنين اللي فاتت هي الآلة الناسخة، طراز أ . أكس أربعة خمسة صفر.	كل ما اشتريتها من منتجاتنا من عام عام الماضي هو آلة الطوابع ، طراز ، طراز ، طراز ، ، سي خمسة صفر.
آسف سأعود لاحقاً .	آسف. راح أرجع بعدين.	آسف. سأعود بعد بعد بعد.
هل يتحتم عليك كثيراً أن تعمل حتى ساعة متأخرة ؟	بتظطر كثير تشتغل لوقت متأخر؟	هل ستتأخر كثيرا في الوقت متأخر ؟
هل لديك نفس هذا التصميم بكعب أعلى ؟	عندك نفس هاذ الديزاين بس كعب أعلى؟	هل لديك نفس هذا الملصقات فقط مقاس أعلى ؟
التكلفة ، من فضلك . هل تقبلون بطاقة فيزا ؟	الحساب ، لو سمحت. يتقبلو بطاقة فيزا؟	هل تقبله الحساب ، من فضلك ؟
من فضلك استلق هنا .	لو سمحت، اتمدد هون.	من فضلك ، ، ، اجلس هنا.
اسمي ميتشكو تاناكا ، ورقم الرحلة إلى طوكيو هو خمسة ، صفر ، واحد .	اسمي ميتشكو تاناكا، ورقم الرحلة لطوكيو هو خمسة، صفر، واحد.	اسمي سنكو ، رقم الرحلة إلى طوكيو هو خمسة ، صفر ، واحد.
آه ، كلا . من فضلك أسرع . إننا متأخرون .	آه، لأ. لو سمحت عجل، إحنا متأخرين.	نعم ، لا. من فضلك أسرع ، نحن متأخرا.
ما هي أفضل جولة حتى أرى أشهر الأماكن ؟	شو هي أحسن رحلة عشان أشوف أشهر الأماكن؟	ما هي أفضل رحلة أن أرى معظم الأماكن ؟
حسنا . مقعدان من فضلك .	ماشي. كرسيين لو سمحت.	حسنا. مقعدين من فضلك.
أظن أنه بديع المنظر .	بظن انه منظره صاير حلو.	أعتقد أن منظره يبدو جميل.
بنطلون أخر ؟	بنطلون ثاني؟	هل قميص آخر ؟
سأجرب بعضاً من الشراب المثلج .	بدي أجرب شوي من العصير المثلج.	أريد أن أحجز بعض العصير الخاص ب الفاكهة.
هل هذا هو الطريق الصحيح إلى المحطة المركزية ؟	هاد الطريق الصح للمحطة الرئيسية؟	هل هذا الطريق الصحيح إلى المحطة الرئيسية ؟
أريد شراء تذكارات لأصدقائي . أيمكن أن تُوصي ببعض منها ؟	بدي أشتري هدايا تذكارية لأصحابي. ممكن تنصحني بإشي؟	أريد شراء هدايا تذكارية بصديقي. هل يمكنك أن توصي في شيء ؟
أريد الحصول على تأمين .	بدي تأمين.	أريد تأمين.
آوه إلقاء نظرة على صندوقك .	واو أنا حاب أشوف صندوقك.	لا أنا أريد أن أرى صندوقك.
إنها أربعة عشرة .	هاي أربعطعش.	هذه أربعة عشر.
سأنتظر حتى يتاح الجلوس في التراس .	رح أستنا لحتى يصير الجلوس بالتراس ممكن.	سأنتظر حتى يكون الجلوس في المحطة ممكن.
يمكنك أن تمكث في منزلي .	ممكن تفضل تقعد ببيتي.	هل يمكنك أن تفضل الجلوس في منزلي ؟
هذا , من فضلك .	هاظ ، لو سمحت.	هذا ، من فضلك.
من فضلك نظف هذا المعطف .	لو سمحت نظف هاظا الكبوت.	من فضلك أرني هذا الصابون.
شراب الشمام كحلاء ، من فضلك .	عصير الشمام كحلو ، لو سمحت.	عصير الفاكهة ، من فضلك.
أخطط لتعلم الجولف .	بفكر أتعلم جولف.	أود أن أتعلم جولف.
كان هذا مكسوراً بالفعل عندما فتحت الطرد .	كان هاذ مكسور فعلاً لما فتحت الطرد.	كان هذا مكسور بالفعل عندما أفتح الطرد.
توقفت ساعتي .	ساعتي وقفت.	الساعة ، يتوقف.
أجل . إنها مشكلة تخلص من الفضلات .	أيوة. هاي مشكلة كب الزبالة.	نعم. هذه مشكلة ظف النفايات.
هناك محل لبيع الزهور في الطريق .	في محل ورد بالطريق .	يوجد محل زهور في الطريق.
هل السيدات يقبلن هذا ؟	الستات بقبلن بهاذ؟	هل السيدات تقبل هذا ؟
هل يمكننا ترك أشياءنا ما عدا الأشياء القيمة في الحافلة ؟	بنقدر نخلي اغراضنا هون، ماعيدا الأشياء الغالية، في الباص؟	هل يمكن أن آخذ أمتعتي هنا ، لا أعود للمتعة ، في الحافلة ؟
بمقدورك أن ترى واحداً عند " كارينجي هول " .	بامكانك تشوف واحد بقاعة كارنيجي.	هل يمكنك أن ترى واحد في قاعة هيلتون.
آسف جدا ، لكني أود تأجيل الميعاد .	آسف كثير، بس بدي أجل الموعد .	آسف جدا ، ولكن أريد أن أنتظر الموعد.
أجل , يمكننا القيام بخدمتك بداية من السابعة .	اها، منقدر نخدمك من الساعة السابعة.	نعم ، يمكننا عملك من الساعة السابعة.
على أي جانب من ميدان الاتحاد هي ؟	على اي جهة من دوار الاتحاد بتكون؟	من أي ناحية من شارع النادي تكون ؟
أريد بعضاً من كريم التنظيف .	بدي شوية كريم تنظيف.	أريد بعض كريم تنظيف.
من فضلك لفها كل على حدة .	من فضلك غلفها كل وحدة لحالها .	من فضلك أرني كل واحدة معها.
كود المنطقة هو ثلاثة . ورقم الهاتف هو اثنان ثلاثة أربعة ثلاثة أربعة صفر صفر .	رقم المنطقة ثلاثة. ورقم التلفون اثنين ثلاثة أربعة ثلاثة اربعة صفر صفر.	رقم المنطقة ثلاثة. رقم الهاتف اثنان ثلاثة أربعة ثلاثة أربعة صفر صفر.
كم عدد المرات التي سأغير فيها القطارات للوصول إلى هناك ؟	كم قطار رح اركب عشان أوصل هناك؟	كم قطار سأصل إلى هناك ؟
هل تريد تسوية الفاتورة الآن ؟	راح تحاسب عالفاتورة هسا؟	هل ستدفع على الفاتورة الآن ؟
هل هذه السيارة الأجرة متاحة ؟	هاي التكسي فاضية؟	هل هذه الحافلة مفتوحة ؟
هل يمكن أن تدلني على بعض الفنادق الرخيصة والنظيفة ؟	بصير ادلني عبعض الفنادق الرخيصة والنظيفة؟	هل يمكن أن تخبرني ببعض الفندق مجانية و الدافئة ؟
أنا مع بعض الأصدقاء .	أنا مع شوية صحاب.	أنا مع بعض صديقي.
لشخصين عند الساعة السابعة , الاسم وتاناب .	لشخصين الساعة سبعة. الاسم وتاناب.	شخصية واحد الساعة السابعة. اسمي ، ، ، اسمك. اسمك ، ، ، اسم انونااا.
ما هو الإجمالي ؟	شو الإجمالي؟	ما هو الإجمالي ؟
أين يمكنني أن أشتري زلاجات وأحذية ؟	من وين بقدر اشتري زلاجات و أحذية؟	من أين يمكنني شراء صابون و أحذية ؟
ما وجه الاختلاف بين منتجك ومنتج منافسيك ؟	شو الفرق بين منتجك ومنتج الناس اللي بتنافسك؟	ما هو سعر منتجك في منتج الأشخاص التي تنافسك ؟
أين تعلم السيد جونز اللغة اليابانية ؟	وين السيد جونز تعلّم اللغة اليابانية؟	أين السيد جونز تعرف اللغة اليابانية ؟
لا يمكنني وضع الأمتعة تحت المقعد . هل لك أن تحتفظ بها لأجلي من فضلك ؟	أنا ما بقدر أحط شنطي تحت المقعد. ممكن تخبيلي ياهم لو سمحت؟	أنا لا أستطيع أن أضع حقائبي في مقعدي. هل يمكنك أن تحتفظ بها من فضلك ؟
هل يمكنك أن تستدعي موظفاً يتحدث اليابانية ؟	ممكن تنادي موظف بحكي بالياباني؟	هل يمكنك أن ترسل طبيب يتحدث اليابانية ؟
سوف أبلغ الشرطة بذلك .	راح أبلغ الشرطة بهاظ الإشي.	سأتصل الشرطة بهذا الشيء.
عيد ميلادك اقترب .	عيد ميلادك قرب.	سوف أن عيدك قريبا.
تعثر صديقي والتوي كاحله .	صاحبي وقع والتوى كاحله.	حبيبي لم لم لتُُُُُُُُُُُُُُُُُُُُُُُُُُُُُُُُُُُُُُُُُُُُُُُُُُُُُُُُُُُُُُُُُُُُُُُُُُُُُُُُُُُُُُُُُُُُُُُُُُُُُُُُُُُ.
نعم , أعتقد ذلك .	اه، بتوقع هيك.	نعم ، أعتقد ذلك.
اتجاه واحد .	اتجاه واحد.	اتجاه واحد.
هلاّ جعلت توقيعك هنا والحروف الأولى من اسمك هنا .	هات خلي توقيعك هون وأول حروف اسمك هون.	سأرسل جوازك هنا أول لون اسمك هنا.
أين يمكن أن أوقف سيارتي ؟	وين ممكن أقف سيارتي؟	أين يمكنني أن أحجز سيارتي ؟
سأغلق الآن . شكراً على انتباهكم .	رح أسكر هسا. شكراً على انتباهكو.	سأتناول سجائر الآن. شكرا على ألتقطك.
اللعنة . اللعنة . اللعنة . اللعنة . لقد كبرت معتاداً على وجهها .	يلعن. يلعن. يلعن. يلعن. أنا تعودت كثيرعلى وجهها.	نعم ، يا سيدي. يا سيدي. أنا كرهت ، يا سيدي. أنا كرهت الوجه.
سنراك في الغد .	رح نشوفك بكرة.	سوف تراه غدا.
عندي ثلاثة أطفال .	عندي ثلاث ولاد.	لدي ثلاثة أشخاص.
نعم ، هي ، لأنك تستطيع أن ترى العلم أمام مكتب البريد .	صح، هي . لأنه بتقدر تشوف العلم قدام مكتب البريد.	بالتأكيد ، هي. لقد يمكنك أن لترى التمثيل على مكتب البريد.
هل تستطيع إنزال أمتعي إلى الردهة غداً صباحاً ؟	ممكن تنزل أغراضي على الردهة بكرة الصبح؟	هل يمكنك أن تأخذ أمتعتي إلى الطاولة غدا ؟
أربع ليالي .	أربع ليالي.	أربعة ليال.
دقيقة فقط ، من فضلك .	ديقة بس، لو سمحت.	لفف فقط ، من فضلك.
هل ستواجهني أية صعوبات في الجمارك ؟	راح ألاقي أي صعوبة بالتعامل مع الجمارك؟	هل سأنتظر أي أي صعوبة في الخدمة ب الجمارك ؟
هلا أخبرتني كيفية تعديلها من فضلك ؟	ممكن تحكيلي كيف اعدلها لو سمحت؟	هل لك أن تخبرني كيف أقيسها من فضلك ؟
حسنا ، لا أعلم بعد لكنني سوف أحاول بالتأكيد .	ماشي، مش عارف لحد الآن بس رح أحاول أكيد.	حسنا ، لا أعرف الآن فقط فقط سأحاول بالفعل.
موعده المقرر هو الثامنة والنصف مساءْ بالتوقيت المحلي .	موعده هو الساعة ثمنية ونص المسا بالتوقيت المحلي.	متى موعد موعدها هو الساعة الثامنة وعشرين صباحا في التوقيت المحلي.
هل يمكن أن تضع حقيبة السفر هذه في صندوق السيارة .	ممكن لو سمحت تحطلي شنة السفر هاي بالطبون ؟	هل من الممكن أن تضع لي حقيبة السفر هذه في الشارع ؟
هذه ليست تفاحة ولكنها خوخة .	هاي مش تفاحة هاي خوخة.	هذا ليس تفاح هذه برتقالة.
إذا كان بالإمكان ، لم أكن لأخلع السنّة .	اذا ممكن، أنا بفضل ما تقلع السن.	من الممكن ، أنا آمل أن تغسل السن.
علي أن أفحص ذلك مع زوجتي .	لازم أشوف الموضوع مع مرتي.	يجب أن أرى الأمر مع زوجتي.
لا أعتقد أن هذه السكينة نظيفة . أيمكنك أن تُحضر لي واحدة أخرى ؟	أنا ما بظن إنه هاي السكينة نظيفة. بتقدر تجبلي وحدة تانية؟	أنا لا أعتقد أن هذه الحقيبة نظيفة. هل يمكنك أن تحضر لي واحدة أخرى ؟
املأ البنود الآتية في بطاقة التسجيل .	املي البنود اللي جاية على كرت التسجيل.	من فضلك أخبرني هذه القيم التي تحصل على بطاقة التسجيل.
ما الذي يمكن أن أراه في هذه الجولة ؟	شو بقدر أشوف بهاي الرحلة؟	ما يمكن أن أرى هذه الرحلة ؟
هل هذا المتبل حار ؟	هاظ المتبل حار؟	هل هذا الحساء حار ؟
هذه كلها مطبوعات .	هاي كلها مطبوعات.	هذا كل طوابع.
هذه هديه لصديق .	هاي هدية لرفيقي.	هذه هدية بصديقي.
أراهن بخمسة دولارات .	براهن بخمس دولارات .	أرني خمسة دولارات.
هل توجد أية جولة صباحية ؟	في أي جولات صباحية؟	هل يوجد أي جولة صباحية ؟
سنمكث .	راح نظل.	سأذهب.
هل توجد غرفة استراحة عامة بالقرب من هنا ؟	في غرفة استراحة عامة جنبنا هون؟	هل يوجد غرفة استراحة عامة في هنا ؟
آسف ، لقد تحققت من إدارة الخدمة وإدارة المفقودات ولم أجدها عندهم .	بعتذر، تأكدت من إدارة الخدمة وإدارة المقودات وما لقيتها عندهم.	آسف ، أعتقد أن مكتب الخدمة و مكتب السيارات لم أجدها هناك.
هل قلت لي كيف أذهب إلى المتحف ؟	قلتلي كيف بروح على المتحف؟	هل أخبرتني كيف أذهب إلى المتحف ؟
لا أريد إنفاق أكثر من عشرين دولاراً .	ما بدي أصرف أكثر من عشرين دولار.	لا أريد أن أصرف أكثر من عشرين دولارا.
هذا المكان مكتظ بالناسب ، أليس كذلك ؟	هاظ المكان معبى ناس، مش هيك؟	هذا المكان يوجد لمداا ، أليس كذلك ؟
سأحضر المدرسة الصيفية بجامعة هاواي .	رح أداوم بالمدرسة الصيفية بجامعة هاواي.	سأعمل في المدرسة الصيفية في جامعة هاواي.
من فضلك اعطني تصريحاً سارياً لمدة أسبوع .	لو سمحت أعطيني اذن لمدة أسبوع.	من فضلك أعطني إذن لمدة أسبوعين.
ما هذا من فضلك ؟	شو هاظ لو سمحت؟	ما هذا من فضلك ؟
سأحتاج إلى بطاقة ائتمان .	راح أحتاج الفيزا .	سأحتاج إلى بطاقة الائتمانية.
إذن دعنا نبطنها من الداخل .	معناته خلينا نحشيها من جوا.	هذا يجب أن أنظفها من هنا.
هل هذه محطة قطار سريع ؟	هاي محطة اكسبريس؟	هل هذه محطة مترو ؟
من ثمانية إلى اثنى عشر من فضلك .	من ثمانية ل اثنعش لو سمحت.	من ثمانية من عشر من فضلك.
أود قياس بذلة السباق الخاصة بي .	بدي اقيس بدلة السباق تبعتي.	أريد أن أقيس حقيبة السباق الخاصة بي.
لقد طلبته منذ وقت طويل .	طلبته من زمان.	لقد طلبته منذ وقت الآن.
أين الحمام ؟	وين الحمام؟	أين الحمام ؟
اليابانيون لا يأخذون إجازات طويلة .	اليبانيين ما بيوخذو عطل طويلة.	لا تأخذ عطلة طويل.
هاهي .	هيها .	إنها.
أنها مناسبة تماما .	زابطة تماما.	لللللللللللللللللل.
مرحبا . هذه هي الخطوط الجوية المتحدة .	مرحبا . هاي هي الخطوط الجوية المتحدة .	مرحبا. هذه هي الخطوط الجوية المتحدة.
أعيش في شقة إيجارها ثمانون ألف ين في الشهر .	بعيش بشقة، الإجارتها ثمانين ألف ين بالشهر.	أنا في غرفة ، تكلفة الأجرة مائة ألف ين في الشهر.
هل هناك أماكن شاغرة بالنسبة لرحلة الخميس ؟	في أماكن فاظية برحلة يوم الخميس؟	هل يوجد أماكن اتُلة في رحلة يوم الجمعة ؟
أعرف نادي قديم لموسيقى الجاز بوسط البلد .	بعرف نادي قديم لموسيقى الجاز بوسط البلد.	أعرف فندق قديم ل موسيقى الجاز في الشارع.
هل انعطف يساراً ؟	بدي ألف يمين؟	أريد مائة يمينا ؟
أحبه فعلاً .	بحبه فعلا.	أعتقد أن أحبه بالفعل.
من فضلك احفظ هذه الحقائب في محتجز الجمارك .	لو سمحت خلي هالشنتات بالجمارك.	من فضلك احتفظ هذه حقائب في الجمارك.
هل يمكنني استخدام إِشارة ضوئية ؟	ممكن استعمل إشارة ضوئية؟	هل يمكن أن أستخدم إشارات الزجاج ؟
أعمل في شركة نشر .	بشتغل بشركة نشر.	أريد العمل بشركة نشرت.
اتجه يساراً في هذا الشارع ثم انعطف عند أول منعطف يمين .	روح يمين بهالشارع وبعدين اتوجه يمين عند اول منعطف.	خذ يمين في هذا الشارع ثم تذهب يمينا إلى أول شارع.
بالفعل لدي أخبار . أنا سأتزوج .	فعلياً، عندي أخبار. أنا بدي أجوز.	حسنا ، لدي خبرا. أنا أريد أن أحجز.
واحد هامبرجر وواحد شيز برجر ، من فضلك .	واحد همبرقر وواحد شيز برقر، لو سمحت.	كل هو لللللللللللللللللللللللللللللللللللللللللللللللللللللللللللللللللللللللللللللللللللللللللللللللللللللللللللللل ، ل للللللللل
أوه ، آسف . كانت هناك مشاكل ونحن نقوم بحلها ، هل تتفضل بالانتظار لمدة ثلاثين دقيقة ؟	أووه، أنا آسف. كان في مشاكل منحلها. ممكن تستنى لثلاثين دقيقة؟	نعم ، أنا آسف. هل يمكنك أن تتابع لمدة ثلاثين دقيقة ؟
كم عددها ؟	كم عددها ؟	كم عددها ؟
و هو كذلك . سأوصلك إلى هناك .	و هو هيك . رح اوصلك لهناك.	إنه هذا. سأصلك إلى هناك.
أريد فندق أرخص قليلاً .	بدي فندق أرخص شوي.	أريد فندق أرخص قليلا.
الأجدر بك أن تكف عن ذلك .	أحسنلك تبطل هالاشي.	أفضل لك أن تأجل هذا.
هل أي من المتاجر الكبيرة به يعمل الآن ؟	في أي مول فاتحة هسه؟	هل يوجد أي متجر مفتوحة الآن ؟
كم تستغرق حتى تصبح متاحة .	قديش بدها حتى تصير فاظية .	كم تستغرق من الوقت حتى تكون ل ل ل ل ل ل ل ل ل.
معذرة . أريد أن أطلب طلب .	معلش . بدي أطلب طلب .	نعم. أريد طلب.
عندنا حفلة مساء الجمعة . لماذا لا تنضم لنا ؟	عنا حفلة يوم الجمعة بالليل. ليش ما تيجي معنا؟	لدينا حفلة يوم الجمعة ليلا. هل لم تأتي معنا ؟
كيف أستقلها ؟	كيف اركبهاا؟	كيف أستأجرها ؟
هل هي جولة يوم كامل ؟	هي الرحلة ليوم كامل؟	هل هي الرحلة يوم كامل ؟
في أي وقت يمكنني مغادرة الفندق ؟	بأي ساعة ممكن أعمل خروج من الفندق؟	أي ساعة يمكنني أن أحجز في الفندق ؟
أحضر لي بعض من الجبن المبشور .	هاتلي شوي من الجبنة المبروشة.	هل لك أن أحضر لي بعض من الجبنة بيضاء.
هل لديك أحذية حريمي عند أصابع القدم ؟	عندك كنادر ستاتي مفتوحة من عند الأصابع؟	هل لديك صفيحات لللنظف من عند الوريد ؟
هذه كبيرة جداً .	هاي كثير كبيرة.	هذا كبير جدا.
نبيذ غير حلو ، من فضلك .	واين بدون سكر، لو سمحت.	أين بدون سكر ، من فضلك.
تبلغ الميزانية أقل من ألف دولار .	الميزانية أقل من ألف دولار.	هذه الميزانية أقل من مائة دولارا.
إنها معطلة . هل تستطع فحص آلة التصوير هذه ؟	هاي معطلة. بتقدر تشيّك على آلة التصوير هاي؟	هذا جاهز. هل يمكنك أن تفحص آلة التصوير هذه ؟
لقد كان هناك حادث مرور .	كان في حادث سير.	كان هناك حادث سيارة.
إجمالي سكان اليابان حوالي مائة وثلاثين مليوناً .	العدد الكلي لسكان اليابان حوالي مية وثلاثين مليون.	ما هو عدد سكان اليابان حوالي مائة وعشرينمائةمائة.
أي نوع من الملابس ؟	أي نوع من الأواعي ؟	أي نوع من الملابس ؟
في أي مجال كان من قبل ؟	بأي مجال هو كان قبل؟	أي مكان هو كان قبل ؟
كم تتكلف الليموزين للذهاب إلى وسط المدينة ؟	قديش تكلف الليموزين عشان نروح عوسط البلد؟	كم تكلف لوزين للذهاب إلى الوسط ؟
الاسم هو جورو موتوياما . والرقم هو صفر ثلاثة ثلاثة اثنان ستة واحد اثنان أربعة تسعة خمسة .	الاسم هو جورو موتوياما . والرقم هو صفر ثلاثة ثلاثة اثنان ستة واحد اثنان أربعة تسعة خمسة .	اسمي هو سانو توواا. رقم رقم ثلاثة ثلاثة ثلاثة ثلاثة ثلاثة ثلاثة ثلاثة ثلاثة ثلاثة ثلاثة ثلاثة ثلاثة ثلاثة ثلاثة ثلاثة ثلاثة ثلاثة ثلاثة ثلاثة ثلاثة ثلاثة ثلاثة ثلاثة ثلاثة ثلاثة ثلاثة ثلاثة ثلاثة ثلاثة ثلاثة ثلاثة ثلاثة ثلاثة ثلاثة ثلاثة ثلاثة ثلاثة ثلاثة ثلاثة ثلاثة ثلاثة ثلاثة ثلاثة ثلاثة ثلاثة ثلاثة ثلاثة ثلاثة ثلاثة ثلاثة ثلاثة ثلاثة ثلاثة ثلاثة ثلاثة ثلاثة ثلاثة ثلاثة ثلاثة ثلاثة ثلاثة ثلاثة…
لا ، ولكن شكراً لك . إنني أشعر بتحسن .	لا، بس شكرًا هونيك. أنا حاسس انو صرت أحسن.	لا ، لكن شكرا هوك. أنا متأكد أن أني كنت أفضل.
هل لك أن نبدل مقاعدنا من فضلك ؟	ممكن نبدل كراسينا لو سمحت؟	هل يمكن أن تغير مقاعدنا من فضلك ؟
هل هناك مكان يتم فيه عزف الموسيقي الريفية ؟	ما في أي مكان بعزف ألحان ريفية؟	لا يوجد أي مكان عزف موسيقى برية ؟
هلا أخبرتني قبل أن نصل إلى درهام ؟	بصير تخبرني قبل ما نوصل لـ درهام؟	هل يمكن أن تخبرني متى نصل إلى للللللللللللللللللللللللللللللللللللللللللللللللللللللللللللللللللللللللللللللللللللللللللللللللللللللللل ني أن تخبرني قبل الوصول إلى ل ل لل
ظل سائراً عبر هذا الممر , وستجدها على الجانب الأيمن .	ظل ماشي بالممر هاذ , و رح تلاقيها عالجهة اليمين.	لم يتوقف في الطريق هذا ، سوف تجدها على الجانب اليسرى.
أشعر بصداع .	بحس بصداع.	أشعر بألم.
عامل الصيانة سيصعد في الحال .	عامل الصيانة راح يطلع مباشرة.	خدمة الصيانة سوف يصل فورا.
هل تمانع في جلوسي هنا ؟	بتمانع لو اقعد هون؟	هل يمكن أن تقبل أن أجلس هنا ؟
لقد قمت بزيارة البحيرات الكبرى لأول مرة .	هاي أول مرة بزور البحيرات الكبرى.	هذا أول المرة أزور البحيرات الكبيرة.
أصبت بالتهاب في الحلق .	التهب حلقي .	لقد تشعر بالتورم في حلقي.
نسافر جواً ثلاث مرات في الأسبوع ، أيام الثلاثاء والجمعة والسبت .	بنسافر بالطيارة ثلث مرات بالأسبوع، الثلاثاء، الجمعة والسبت.	لقد نسافر بال طائرة ثلاث مرات في الأسبوع ، يوم السبت.
نعم . أيقظني من النوم بعد ثلاثة ساعات , من فضلك .	أيوة . صحيني من النوم بعد ثلاث ساعات, لو سمحت.	نعم. أرني من النوم بعد ثلاث ساعات, من فضلك.
إلى أين يجب علي أن أنقل ؟	لوين لازم أحول؟	أين يجب أن أхват ؟
لا أعرف كثيراً عن النبيذ ؟ ماذا يناسب هذا الطبق ؟	أنا ما بعرف كثير بالواين. شو بنفع مع هاذ الأكل؟	أنا لا أعرف كثيرا في الين. ماذا يمكن أن تفعل مع هذا الطعام ؟
وللشرب ؟ .	بتشرب إشي ؟ .	هل تغسل شيئا ؟
نعم ، هذا لا يشمل الوجبات .	أيوة، هاذ ما بشمل الأكل.	نعم ، هذا لا يوجد في الطعام.
قمة جبل " فوجي " هي اعلي قمة جبلية في اليابان حيث يبلغ ارتفاعها ثلاثة آلاف وسبعمائة وستون مترا .	جبل فوجي هو أعلى قمة باليابان على ارتفاع ثلاثة ألاف وسبعمية وستين متر.	إنه هو أعلى درجة في اليابان على مقاس خمسة مائة ومائة وثلاثين متر.
هل يمكن أن ترسل أحدا ؟	ممكن تبعت حدا؟	هل يمكن أن ترسل شخص ؟
هل من الممكن أن تفصل أكثر ؟	يتقدر توضح أكثر ؟	هل يمكنك أن توضح أكثر ؟
أريد واحدة حديثة .	بدي وحدة جديدة.	أريد واحدة جديدة.
حسنا ، ولكن ليس منطقة المقاعد المكشوفة . فاليوم شديد الحرارة .	طيب ، بس مش على مكان الكراسي المكشوفة. اليوم كثير شوب.	حسنا ، ولكن لا على مكان المقاعد مفتوحة. اليوم شديد التسوق.
سأرسلها لك ، لذا من فضلك انتظر هنا .	راح أبعثها الك، عشان هيك استنى هون لو سمحت.	سأرسلها لك ، ولكن من فضلك سأنتظر هنا من فضلك.
أخشى أن يكون هناك خطأ في الفاتورة .	خايف يكون في غلط بالفاتورة.	أعتقد أن هناك خطأ في الفاتورة.
هذا بارد إلى حد ما . هل يمكن أن تقوم بتسخينه ؟	هاظا بارد شوي. ممكن تسخنه؟	هذا بارد قليلا. هل يمكنك أن تجففها ؟
هلا راقبت حقيبتي من فضلك ؟	ممكن تراقبلي شنتي ، لو سمحت؟	هل يمكنك أن تفحص حقيبتي ، من فضلك ؟
لا امتلك أي نقود .	ما معي مصاري.	لا لدي نقود.
أريد عامل تشغيل يتحدث اليابانية من فضلك .	بدي شغيل بيحكي ياباني لو سمحت.	أريد اقود التحدث اليابانية من فضلك.
يبدو أنها نادرة جداً .	شكلها نادرة كثير.	يبدو أنها ثمينة جدا.
إنني على يقين أن المجرم قريب .	أنا متأكد إنه المجرم قريب.	أنا متأكد أن الشخص المزعج قريب.
أجل ، أظن أني سوف أنظر .	ايوا، بظن إني رح اطلع.	نعم ، أعتقد أنني سأغادر.
هل يوجد أحد يستطيع العزف على البيانو ؟	في أي حدا بعرف يعزف عالبيانو؟	هل يوجد أي شخص تعرف عزف الأوبرا ؟
لستُ معتمداً قانونياً .	أنا مش مؤهل.	أنا لا أعرف أعرف.
هل يمكنك أن توصل أمتعتي إلى الغرفة ؟	ممكن توصل اغراضي للغرفة؟	هل يمكنك أن يوصل أمتعتي إلى الغرفة ؟
هل الشوارع الخلفية خطر ؟	الشوارع الخلفية خطرة ؟	هل الشارع الخلفي صعبة ؟
هل لك أن توقظني في تمام السادسة من فضلك ؟	بتقدر تصحيني الساعة ستة، لو سمحت؟	هل يمكنك أن يبكيك الساعة السابعة ، من فضلك ؟
أشعر بحالة سيئة وغثيان .	حاس بلعية ووظعي زفت.	أشعر بشفة, لللنظف.
لقد اتصلت منذ ثلاثة أيام بخصوص حقيبة ضائعة .	اتصلت من ثلاث أيام عشان شنتة ظايعة.	مكالمة من ثلاث أيام إلى حقيبة صغيرة.
بضع دقائق أخرى من فضلك .	كم دقيقة كمان اذا سمحت.	كم دقيقة أيضا من فضلك.
لم أدرك الرحلة رقم عشرون المتجهة إلى سان فرانسيسكو .	ما لحقت الرحلة رقم عشرين اللي رايحة عسان فرانسيسكو.	لا لم أجد الرحلة رقم عشرين المتجهة إلى سان فرانسيسكو.
آه ، عندك ؟ بالتأكيد إن لديك تشكيلة كبيرة .	أها، عندك؟ طبعا إنت عندك تشكيلة كبيرة.	هل لديك ، هل لديك ، هل لديك تشكيلة كبيرة ؟
بطريقة أبطأ ، من فضلك .	بشكل أبطأ ، لو سمحت.	بشكل سريع ، من فضلك.
إنه لا يلائمني .	مش مناسبني.	لا يناسبني.
هل من الممكن إجراء اتصال على أن يتم تحصيل أجرته من الطرف الآخر ؟	ممكن أعمل مكالمة وتوخذوا حقها من الطرف الثاني؟	هل يمكنني أن أقوم ب مكالمة للتناولها من الجانب الآخر ؟
عندك أية شيء يمكن أن أتعاطه للطفح الجلدي ؟	عندك أي اشي ممكن آخذه عشان هاذ الطفح الجلدي؟	هل لديك أي شيء يمكن أن آخذها إلى هذا الجلد الجلدية ؟
هل تفضلت و احتسيت القهوة معي ؟	تتفضل و تشرب قهوة معي؟	هل تفضل أن تشرب قهوة معي ؟
سأقوم بتسجيل الدخول في تمام الساعة الثامنة مساءاً تقريباً .	راح أنزل بالفندق حوالي الساعة ثمنية المسا .	سأنزل في الفندق حوالي الساعة الثامنة صباحا.
إننا على ارتفاع اثني عشر ألف قدم .	احنا على ارتفاع اتناشر ألف قدم.	نحن على حد حوالي خمسة عشر ألف.
لقد تمتعت بإقامتي . شكراً لك .	انبسطت بإقامتي . شكراً الك.	استمتع في الإقامة. شكرا لك.
أُفضلُ حجرة هادئة .	بفظل غرفة هادية.	لا أفضل غرفة هادئة.
كان يجب تدبير وسيلة مواصلات . ذاهبة إلى بوسطن .	لازم ندبر طريقة أو سيارة رايحة على بوسطن.	يجب أن أقود طريقة أو سيارة المتجهة إلى بوسطن.
لقد سرق مسجل الفيديو من غرفتي .	سرقو مسجل الفيديو من غرفتي.	لقد فقدت تذكرة الفيلم من غرفتي.
هذا هو طبقنا المميز , سمك موسى المشوي الخاص بدوفر .	هاذ طبقنا الخاص, سمك موسى المشوي الخاص بدوفر.	هذا طبقنا الخاص, سمك يا سيدي المكهرب الخاص بي.
هل يمكن أن أختر جريدة يابانية , من فضلك ؟	ممكن اختار جريدة يابانية، لو سمحت؟	هل يمكن أن أستدعي مجلة يابانية ، من فضلك ؟
هل لي أن أقاطعكم ؟	ممكن أقاطعكم؟	هل يمكنني أن أحجزكم ؟
هل يوجد بالقرب من هنا مطعم صيني ؟	في مطعم صيني قريب من هون؟	هل يوجد مطعم صيني بالقرب من هنا ؟
لا أريد أي شيء يكون كبير الحجم .	ما بدي أي اشي ظخم.	لا أريد أي شيء.
هل أنت الأخير في هذا الصف ؟	إنت الأخير بهاذ الصف؟	هل أنت آخر في هذا الصف ؟
إن محفظتي نشلت في القطار .	وحدة سرق محفظتي في القطر.	واحدة سرق حقيبتي في البحر.
