# Supplementary material for: Exploring prompting for dialectical machine translation: a focus on north Jordanian Arabic
Source: PeerJ journal article supplement (doi:10.7717/peerj-cs.3209), 2025-11-12
Supplement: Code.zip [file facebookmbart_large_50_prediction.xlsx]

## Sheet: Sheet1
MSA	IrbidDial	T5
ما رأيك في مشاهدة فيلم آخر ؟	شو رأيك نشوف فيلم ثاني؟	شو رايك تشوف فلم ثاني؟
أريد كوبا من الماء لأتناول بعض الدواء , من فضلك .	بدي كاسة مي عشان اوخذ الدوا، لو سمحت.	بدي كاسة مي عشان أشرب شوية الدوا, لو سمحت.
أبغي كرة .	بدي طابة.	بدي كرة.
كيف تحب أن يصفف شعرك اليوم ؟	كيف بدك يسرحلك شعرك اليوم؟	شلون بتحب يصفف شعرك اليوم؟
أريد رداءا ذات أكمام طويلة .	بدي جاكيت كم طويل.	بدي رداء طويلة.
ها-ها . صباح الخير حان دورك . إنه على ما يرام .	هههه. صباح الخير صار دورك. هو كويس.	هاها. صباح الخير حان دورك. صح؟
أين نتقابل ؟	وين بدنا نتلاقى؟	وين بنلاقي؟
لقد أثلج صدري زيارة مقاركم الرئيسية وكذا ما جرى بيننا من مناقشات مهمة . شكراً جزيلاً على ما أبديتموه من تعاون .	فرحت كتير لما زرت مكاتبكم الرئيسية وكمان النقاشات الهمة اللي صارت بيناتنا. كتير شكراً على العون اللي قدمتوه.	انسرق صدري زيارة مقاركم الرئيسية وشو اللي صار بيننا مناقشات مهمة. شكرا كثير على ما عملتموه من تعاون.
هل هذا قطار مباشر ؟	هاذ القطار مباشر؟	هاد القطار مباشر؟
إبريق من القهوة ، لطفاً .	بكرج قهوة، لو سمحت.	إبريق قهوة، لو سمحت.
كم تكلفة الإفطار ؟	بقديش الفطور ؟	قديش بتكلف الفطور؟
من فضلك اختر لي مائدة ذات منظر ليلي لطيف .	من فظلك إختارلي طاولة مع منظر حلو بالليل.	لو سمحت اختاري طاولة منظرها حلو.
أين الحلاق ؟	وين الحلاق؟	وين الحلاق؟
الشاطئ أسفل يمينا . ياله من منظر رائع .	الشط تحت على اليمين. شو المنظر بجنن.	الشاطئ فوق يمينا. منظره حلوة.
كلاً ، إنهم متينين جداً .	لا، هظول كثير قويات.	لا، إنهم كثير مهتمين.
اتجه يسارا عند الناصية الثالثة .	روح يسار من عند الدخلة الثالثة .	روح شمال عند التقاطع الثالث.
أين المحطة النهائية للحافلة ؟	وين اخر موقف للباص؟	وين المحطة النهائية للباص؟
كم يتقاضى المرشد في اليوم ؟	قديش بيوخذ الدليل باليوم؟	قديش بكلف المرشد باليوم؟
أريد كيساً من الفشار ، من فضلك .	بدي كيس بوشار، لو سمحت.	بدي كيس من الفشار، لو سمحت.
من فضلك غير خمسين آلاف ين إلى دولارات أمريكية .	لو سمحت اصرف الخمسين ألف ين لدولر أمريكي.	لو سمحت غير خمسين آلاف ين ل دولارات أمريكية.
أريد قاموس جيب ، من فضلك .	بدي قاموس بنحط بالجيبة ، لو سمحت.	بدي قاموس جيب، لو سمحت.
من فضلك ، أريد فنجاناً من القهوة البيضاء .	لو سمحت ، بدي فنجان قهوة بالحليب.	لو سمحت، بدي كاسة قهوة.
هل يمكن أن أحصل على قمصاني نظيفة غداً صباحاً ؟	ممكن ألاقي قمصاني نظيفات بكرا الصبح؟	ممكن أجيب قمصاني نظيفة بكرا الصبح؟
حسنا , حجرتك يا آنسة هي رقم تسعة صفر ثمانية . هذا مفتاحك .	طيب، غرفتك يا آنسة هي تسعة صفر ثمنية. هاذ مفتاحك.	ماشي, غرفتك يا آنسة رقم تسعة صفر ثمانية. هاد مفتاحك.
نعم ، بالطبع .	أيوا، أكيد.	أه، طبعا.
ما تكلفة المقاعد الخاصة بالشرفة ؟	قديش بتكلف الكراسي تبعت البرندة؟	قديش تكلفة الكراسي الخاصة بالشرفة؟
هل لي بدليل سياحي ؟	ممكن مرشد سياحي؟	ممكن بدليل سياحي؟
أجل ، وأودّ محاسبة المطلوب هاتفياً على قيمة المكالمة .	صح، وأنا بدي احاسب يلي رنيت عليه على حق المكالمة.	أه ، بدي أحاسب المكالمة المطلوبة على قيمة المكالمة.
جلد التمساح الأمريكي .	جلد التمساح الأمريكي.	جلد التمساح الأمريكي.
سأكون هنا الساعة الثامنة إلى الربع .	رح أكون هون الساعة ثمانية إلا ربع.	رح أكون هون الساعة تسعة للربع.
أظن أن الملابس المصنوعة في اليابان قد جرى تفصيلها على نحو أفضل بالتأكيد .	بتوقع انو الأواعي اللي صنعت في اليابان تفصلت بطريقة أحسن أكيد.	بتوقع انه الاواعي المصنوعة باليابان راح تصير احسن.
سأكون هناك حوالي السادسة مساءً .	راح أكون هناك حوالي الساعة ستة المسا.	رح أكون هناك حوالي الساعة ستة المسا.
لا أجيد الإنجليزية . هل ثمة من يتحدث اليابانية هنا ؟	أنا مش بعرف أحكي إنجليزي. في حدا بحكي ياباني هون؟	ما بعرف انجليزي. في حدا بحكي ياباني هون؟
إنني أتصل من كشك عمومي في ماسي .	أنا بحكي معك من كشك عام بماسي.	أنا بترن من كشك عمومي في ماسي.
كم الوقت ؟	قديش الساعة؟	قديش بده الوقت؟
إنني أبحث عن هذا .	أني بدور على هاظ.	أنا بدور على هاد.
لماذا لا تعطيها هدية ؟	ليش ما تعطيها هدية؟	ليش ما تعطيها هدية؟
استمتعنا بالعشاء .	كيفنا عالعشا.	انبسطنا بالعشا.
سأذهب بك على مقعدك . من هنا ، من فضلك .	راح اوديك على كرسيك. من هون، لو سمحت.	راح أروح بك على كرسيك. من هون، لو سمحت.
سأعود إليك عندما تكون أقل انشغالاً .	راح أرجعلك بس تكون مش مشغول كثير.	راح أرجع إليك لما تكون أقل انشغال.
أنا السيد تكاهاشي بالغرفة رقم خمسة تسعة وأربعين . من فضلك أرسل أربع زجاجات من بيرة بودفايزر .	أنا الأستاذ تكاهاشي بالأوضة رقم ٥٩ . لو سمحت بدي أربع بطولين من البيرة بودفايزر.	أنا السيد تكاهاشي بالغرفة رقم خمسة تسعة وأربعين. لو سمحت ابعثلي اربع قزازات بودفايزر.
حسنا ، إنه وقت الغداء . هل تحب أن نناقشه على الغداء ؟	ماشي، وقت الاكل صار. بتحب نحكي عنها واحنا ناكل؟	ماشي، هو وقت الغداء. بتحب نناقشه على الغداء؟
هناك الكثير من الينابيع الحارة .	في كثير ينابيع حارة.	هناك كثير ينابيع حارة.
سر مباشرة ، من فضلك .	روح ع طول، لو سمحت.	روح مباشرة، لو سمحت.
هل تمانع إذا التقطت صورة لك ولسيارتك الأجرة ؟	بتمانع لو أخذت صورة إلك وللتكسي تبعتك؟	عندك مشكلة لو صورت صورة الك لسيارتك؟
كم من الوقت نحتاج للذهاب مشياً من هنا إلى مبنى البلدية ؟	قديش بدنا وقت عشان نمشي من هون لبناية البلدية؟	قديش بدنا نروح مشي من هون على مبنى البلدية؟
هل تستطيع أن تخفض سعرها لوجود بعض البقع بها ؟	بتقدر ترخصها لأنه في عليها شوية بقع؟	بتقدر تنزل سعرها لوجود بعض البقع فيها؟
شكراً ، هذا يكفي .	شكراً ، هاظ بكفي.	مشكور، هاظ يكفي.
أريد الشخص الذي يعد وثائق عادية في حجم ورقة الخطاب بدون الحاجة إلى طيهم .	بدي الشخص اللي بعمل الوثائق اللي بحجم الورق العادي بدون ما يظطر يثنيهم.	بدي حدا يعد وثائق عادية بحجم ورقة الخطاب بدون ما يشوفهم.
هل نحتاج إلى طرح هذا للتصويت ؟ إن لم نكن في حاجة إلى هذا ، فإمكاني أن أعتقد حينئذ أننا قد وصلنا إلى نتيجة , سأقوم بإرسالها إلى مجلس إدارتنا صباح غد .	هل احنا محتاجين نحط هاظ للتصويت؟ اذا لأ، بتوقع أنه وصلنا للنتيجة، بدي أبعثها لمجلس ادارتنا بكرا الصبح.	بدنا نعمل هاد للتصويت؟ لو ما بدنا نعمل هاد، بقدر أظن أنه رح نتوصل لنتيجة, رح أبعثها على مجلس إدارتنا بكرا الصبح.
أين مترو الأنفاق ؟	وين المترو؟	وين مترو الأنفاق؟
كنت أفكر في الحصول على هذه الدورة في فترة نصف العام المقبلة .	كنت بفكر أوخذ هالكورس بفترة نص السنة الجاية.	كنت بفكر أجيب هاي الدورة خلال نص السنة الجاي.
الخامس عشر من سبتمبر يوم احترام المسنين .	خمسطعش تسعة هو يوم احترام المسنين.	خمسطعش يوم احترام المسنين.
ارفعوا أيديكم .	ارفعوا إيديكو	ارفعوا أيديكم.
أين موقف الحافلات ل بي ؟	وين مجمع الباصات ل بي ؟	وين موقف الباصات ل بي؟
قم بدفعها من فضلك , إن كان ذلك ممكنا .	لو سمحت دزها , إذا بصير	ادفعها لو سمحت, لو سمحت.
لقد نسيت أن آخذ حقيبتي اليدوية .	نسيت آخذ شنتة الإيد.	نسيت آخذ شنتي اليدوية.
فكرة صائبة . متى تخطط للمجيء ؟	فكرة صحيحة. متى بتنوي تيجي؟	فكرة حلوة. متى بتفكر بالموضوع؟
اثنان ويسكي مع الماء , من فضلك .	تنين ويسكي مع مية, لو سمحت.	ثنين ويسكي مع المي, لو سمحت.
على فكرة , هل أنت غير مشغول السبت القادم ؟	بالمناسبة، راح تكون فاضي السبت الجاي؟	على فكرة, انت مش مشغول السبت الجاي؟
هل لديك هذا باللون الأخضر الداكن ؟	عندك هاذ باللون الاخضر الغامق؟	عندك هاد باللون الأخضر؟
هالو ، هل هذه تعود إلى روي ؟	مرحبا، هاي لروي؟	هالو، هاي بترجع على روي؟
أريد حامل ثلاثي .	بدي حامل ثلاثي.	بدي حامل ثلاثي.
عظيم . كنت أبحث عن سيارة أجرة لكن هذا أفضل .	كتير حلو. كنت قاعد بدور على تاكسي بس هاي احسن.	حلو. كنت بدور على تاكسي بس هاد أحسن.
ثلاثة اثنان واحد اثنان . انتظر ثانية ، حسنا ؟ أريد أن أرسل لك شيئاً هنا . معذرة .	ثلاثه اثنين واحد اثنين. استناني شوي , طيب؟ بدي أبعثلك اشي هون. اعذرني.	ثلاث اثنين واحد اثنين. استنى مرة ثانية، ماشي؟ بدي أبعثلك إشي هون. معذرة.
حسنا ، إنه باهظ الثمن . إنه لم يصنع في اليابان ، أليس كذلك ؟	تمام ، هو غالي .اكيد مش صنع اليابان، مش؟	ماشي، هاد كثير غالي. ما بصنع باليابان، صح؟
ويسكي اسكتلندي وماء من فضلك .	ويسكي اسكتلاندي ومية لو سمحت.	ويسكي اسكتلندي و مي لو سمحت.
هل توجد أية كازينوهات جيدة ؟	في أي كازينوهات حلوة؟	في كازينوهات كويسة؟
إنها عاملتني كما لو كنت متسولاُ .	عاملتني كإني شحاد.	هي عاملتني زي ما كنت متسول.
شخص ما فتح الطرد الخاص بي .	في حد فتح الطرد تبعي.	حدا بفتح الطرد تبعي.
هل تريد أن افحص موتور السيارة ؟	بدك ياني أفحص ماتور السيارة؟	بدك تفحص موتور السيارة؟
أنا في نزهة طويلة سيرا على الأقدام .	أني طالعة برحلة طويلة تمشاية عجري.	أنا برحلة طويلة مشي عالشمال.
هذه الأيام ، استخدم الكمبيوتر بشكل دائم في العمل .	هاي الأيام ، أنا بستخدم الكمبيوتر دايماً بالشغل.	هاي الأيام، استخدم الكمبيوتر بشكل دائم بالشغل.
موظفو المبيعات في هذا المتجر لطفاء جداً .	موظفين المبيعات بهاذ المحل لطيفين كثير.	موظفو المبيعات بهاد المحل كثير مبسوطين.
الثاني من على اليسار .	الثاني عالشمال .	الثاني من على اليسار.
هل أنزل هنا لمركز روكفيلر ؟	أنزل من هون عمركز روكفيلر؟	أنزل هون لمركز روكفيلر؟
هذه السيدة كاوازو في غرفة رقم ستة عشر أحدى عشر .	هاي الست كاوازو بالغرفة سطعش إحدعش.	هاي السيدة كاوازو بغرفة رقم ستطعش واحدعش.
هل تستطيع خفضها حتى عشرين دولار ، من فضلك ؟	بتقدر تنزلها لعشرين دولار، لو سمحت؟	بتقدر خفضها لعشرين دولار، لو سمحت؟
أشعر بتحسن .	حاس بتحسن.	حاس حالي احسن.
هل يمكنكم صرف الشيك ذو المائتي دولار الخاص بي ؟	بتقدروا تصرفولي الشيك أبو الميتين دولر تاعي؟	بتقدرو تصرفوا الشيك تبعي تبعي؟
ولكن لا ضرورة لدفع بقشيش .	بس ما في داعي للبخشيش.	بس مش لازم أدفع بقشيش.
لقد جاء لتوه .	جا هسا.	إجيت لتوه.
لنتصل به .	خلينا نرلنه.	خلينا نتصل فيه.
بالمناسبة ، اسمي هيروش إيجيما .	بالمناسبة، اسمي هيروشي ايجيما.	بالمناسبة، اسمي هيروش إيجيما.
التاسع والعشرون من أغسطس .	تسعه وعشرين من آب.	تسعة وعشرين سبعة.
هل لا زال لديكم مقاعد لعرض الليلة ؟	ظل في عندكم محلات لعرض الليلة؟	عندكم كراسي عرض الليلة؟
أريد القيام بحجز للساعة الثالثة والنصف ظهراُ .	بدي أعمل حجز للساعة ثلاثة ونص الظهر.	بدي أحجز للساعة ثلاث ونص الظهر.
سوف نحضرها الآن . ما هو رقم غرفتك ؟	رح نجيبها هلا . شو رقم غرفتك ؟	رح نجيبها هسا. شو رقم غرفتك؟
رقم غرفتي هو ثلاثة ستة وعشرين . هل يمكن أن تأخذ الغسيل ؟	رقم غرفتي هو ثلاثة ستة وعشرين. بصير توخذ الغسيل؟	رقم غرفتي هو ثلاثة ستة وعشرين. بتقدر تاخد الغسيل؟
أليس لديك دروس تجريبية ؟	ما عندك كورسات تجريبية؟	ما عندك دروس تجريبية؟
رحلة الطيران دلتا رقم ثمانية وعشرون والمتجهة إلي نيو أورلينز سوف تتأخر حوالي ساعة .	رحلة الطيارة دلتا رقم ثمانية وعشرين اللي رايحة على نيو أورلينز حتى تتأخر حوالي ساعة.	رحلة الطيران دلتا رقم ثمانية وعشرين والمروحة على نيو أورلينز رح تتأخر حوالي ساعة.
هل لديكم غرفة متاحة الليلة ؟	عندكم غرفة فاضية الليلة ؟	عندكم غرفة حلوة الليلة؟
بصراحة ، لا أتفق مع ذلك .	بصراحة، ما بتفق مع هاظ.	بصراحة، ما بتفق مع هيك.
هل لك أن تتفضل وتملأ هذه ؟	بتقدر تتكرم و تعبي هاي؟	بتقدر تفضل وتملأ هاي؟
يبدو أن النقود التي أعطيتني إياها ناقصة عشر دولارات .	شكله المصاري اللي إنطيتني اياها ناقصة عشر دولارات.	شكله النقود اللي أعطيتني إياها ناقصة عشر دولارات.
بالخارج .	برا.	برا.
أريد ما يخصني لكي أرحل .	بدي اللي بخصني مشان أروح.	بدي إشي عشان أروح.
هل يمكن أن ترسلها إلى عنواني في اليابان عن طريق بريد الطرود الدولي وتحصل الثمن من هناك ؟	ممكن توديها على عنواني باليابان عن طريق صفحة الطرود الدولي و توخذ حقه من هناك ؟	ممكن ترسلها على عنواني باليابان عن طريق بريد الطرود الدولي وتجيب الثمن من هناك؟
أين قسم السيدات ؟	وين قسم النسوان؟	وين قسم السيدات؟
إنه ألم حاد .	هو وجع قوي.	هو وجع قوي.
إنني في نفس السن .	أني بنفس العمر.	أنا بنفس السن.
فكرة جميلة .	فكرة حلوة.	فكرة حلوة.
هل الأجانب يمكنهم الحصول على الكتب في المكتبة ؟	بقدروا الأجانب يستخدموا الكتب بالمكتبة؟	الأجانب بقدروا يجيبوا الكتب في المكتبة؟
تحية . أنا جون .	مرحبا. أني جون.	طيب. أنا جون.
هل يمكن أن نبدأ اللعب عندما ينتهون ؟	بنقدر نبلش نلعب لما يخلصوا؟	ممكن نلعب لما ينتهوا؟
مائة وخمسة وثلاثون ين للدولار الواحد .	مية وخمسة وثلثين ين للدولار الواحد.	مية وخمسة وثلاثين ين للدولار.
نعم . انتظر , سوف احضر لك واحدة .	طيب. استنى، راح أجيبلك وحدة.	اه. استنى, رح اجيبلك وحدة.
هلا أنزلتني عند فندق هلتون من فضلك ؟	ممكن تنزلني عند فندق الهيلتون لو سمحت؟	ممكن تنزلني عند فندق هلتون لو سمحت؟
أين الاستعلامات الرياضية ؟	وين الاستعلامات الرياضة؟	وين الاستعلامات الرياضية؟
هذه هي فلوس أقلام الحبر . فاتورة بمائة دولار .	هايذ حق قلام الحبر. فاتورة بمية دولار.	هاي هي فلوس أقلام الحبر. سعرها مية دولار.
لا ، شكراً . من الأفضل أن لا أشرب المزيد .	لا، شكراً. احسنلي ما أشرب اكثر من هيك.	لا، شكرا. أحسن ما أشرب زيادة.
بما في ذلك الإفطار ، والضريبة ، ورسم الخدمة ، سيكون الحساب خمسة أربعون دولارا للشخص الواحد في الليلة .	بتشمل الفطور، الضرايب، ورسم الخدمة، الحساب رح يكون خمسة وأربعين دولار للواحد في الليلة.	بما في ذلك الإفطار، والضريبة، ورسم الخدمة، رح يكون الحساب خمسةأربعين دولار للشخص الواحد باليلة.
ما عرض الأوبرا اليوم ؟	شو عرض الأوبيرا اليوم؟	شو عرض الأوبرا اليوم؟
أريد مقعداً يطل على الممر ، من فضلك .	بدي كرسي يطل عالممر، لو سمحت.	بدي كرسي يطل على الممر، لو سمحت.
أجل أريد شيئاً أقرؤه .	أيوا بدي إشي أقراه.	أه بدي اشي أشوفه.
غير محتمل بدرجة كبيرة .	بنطاقش بدرجة كبيرة.	مش محتمل بدرجة كبيرة.
هل تعرف المطعم يا كيويا ؟	بتعرف المطعم يا كيويا؟	بتعرف المطعم يا كيويا؟
يستطيع الصرافون أن يغيروا دولاراتك من أجل بقشيش الكازينو . هل نذهب ؟	السمسارين بقدروا يصرفولك الدولرات عشان بخشيش الكازينو. بصير نروح؟	بصير الصرافون يغيروا دولاراتك عشان يصيروا بقشيش الكازينو. راح نروح؟
يسعدنا أن نقدم لك الشراب الذي تريده متبوعاً بالغداء . دليل كامل بالمشروبات التي نقدمها على رحلتنا موجودة في دليل المعلومات الخاص بمجلتنا .	بسعدنا إنه نقدملك العصير اللي بتختاره وبيلحقه الغدا . منوفر قائمة كاملة من الشراب في هاي الرحلة موجودة بقسم المعلومات تاع مجلتنا.	بنسعدنا بنقدمك المشروبات اللي بدك ياها على رحلتنا. دليل كامل بالمشروبات اللي بنقدمها موجود في دليلنا الخاص بمجلتنا.
هل أستطيع تأجير أداة للتنفس أثناء السباحة ؟	بقدر أستأجر شغلة للتنفس خلال السباحة؟	بقدر أأجر أداة للتنفس أثناء السباحة؟
آه . هل يمكنني الحصول على وجبتي فيما بعد ؟ أنا أشعر أنني لست على ما يرام الآن .	ممم. ممكن أخد وجبتي بعدين؟ حاسس حالي مش على بعضي هسا.	آه. بقدر اخد وجبتي بعدين؟ أنا حاس حالي مش مليح هسع.
ما هو رقم الرحلة الجوية ؟	شو رقم رحلة الطيران؟	شو رقم الرحلة الجوية؟
أبغي تأجير سيارة من هذا الطراز لمدة يومين .	بدي استأجر سيارة من هاذ الموديل لمدة يومين.	بدي أأجر سيارة من هاد الطراز لمدة يومين.
أنا غير متأكد إذا كنت قد حزمت ملابس كافية لرحلة مدتها ثلاثة أيام .	أنا مش متأكد اذا جهزت وعية بتكفيني لرحلة مدتها ثلاث أيام.	أنا مش متأكد اذا حزمت أواعي مناسبة لرحلة ثلاث ايام.
يوجد بجانب هذا المبني تحديداً .	هو جنب هاذ المبنى بالتحديد .	في مكان هاد المبني تحديدا.
هه . هذه . يبدو اللون جميلاً عليك .	هه. هاي. شكل اللون حلو عليك كثير.	اه. هاي. شكلها حلو عليك.
هل أستطيع تناول غذائي الآن ؟	ممكن أوكل هسا؟	بقدر اكل غذائي هسا؟
هل يتوقف القطار في برايتون ؟	بوقف القطار عند برايتون؟	القطار بوقف في برايتون؟
من المهم جدا أننا نستطيع الوصول إلى المواد الخام التي نحتاجها في المشروع .	اشي كثير مهم إنه قدرنا نوصل لمجموعة المواد الأساسية اللي راح نحتاجها للمشروع.	مهم كثير انه بنقدر نتوصل للمواد الخام يلي بنحتاجها بالمشروع.
أود أن أطلب بدلة داكنة من أجلي .	بدي أطلب بدلة لونها غامق عشاني.	بدي اطلب بدلة داكنة من أجلي.
هذا جيد . متى هو ؟	هيك تمام. متى رح يكون؟	هاظا كويس. متى هو؟
أرغب في شراء شامبو .	أنا بدي أشتري شامبو.	بدي أشتري شامبو.
خمسون جنيهاً .	خمسين قنيه.	خمسين جنيه.
لا يوجد رسم ضروري .	مش موجود رسم ظروري.	ما في رسم ضروري.
هل كان لديك أية خدمات أخرى إلى جانب طعام الإفطار هذا الصباح ؟	في عندك أي خدمات ثانية غير فطور الصبح؟	كان عندك أي خدمات ثانيه على الافطار اليوم الصبح؟
متى يفتح المصرف ؟	أميت بفتح البنك؟	متى بفتح المصرف؟
إجمالي المبلغ المطلوب مائتان وثلاثة وأربعون جنيه ، يا سيدتي .	المبلغ الكلي بطلع ميتين وثلاثة وأربيعين جنيه، يا مدام.	إجمالي المبلغ المطلوب ميتين وثلاثة وأربعين جنيه، يا سيدتي.
لماذا لم يأت إلى الحفلة أمس ؟	ليش ما اجى على الحفلة امبارح؟	ليش ما طلع على الحفلة مبارح؟
أريد لفتان من ISO مائة ، فيلم ملون ، ستة وثلاثين لقطة ، من فضلك .	بدي لفتين أيزو مية، فلم ملون، ستة وثلاثين لقطة ، لو سمحت.	بدي لفتتين من ISO مية ، فيلم ملون ، ستة وثلاثين لقطة ، لو سمحت.
هل لديك مرآة ؟	عندك مراية؟	عندك مرآة؟
هل من المقبول عدم اتباع أي شخص لتعليمات الأمن ؟	بصير حدا ما يتبع تعليمات الأمن؟	من المقبول ما يتبع أي حد تعليمات الأمن؟
علىّ أن ألحق بطائرة العاشرة صباحاً .	لازم ألحق طيارة الساعة عشرة الصبح.	لازم ألحق بالطيارة الساعة عشرة الصبح.
من اين يمكنني الحصول على مسكوكة لركوب المترو ؟	من وين ممكن أجيب تذكرة لأركب المترو؟	من وين بقدر أجيب مسكوكة لركوب المترو؟
أين يمكنني تغير نقودي ؟	وين بقدر أصرف مصاريي؟	وين بقدر أغير شكلي؟
هل بها جهاز تدفئة ؟	بيها جهاز تدفئة؟	فيها تدفئة؟
أريد بعض الكريم الليلي .	بدي كريم ليلي.	بدي شوية الكريم الليلي.
كم تتقاضى ثمنا لإرسالها لليابان ؟	قديش بدك توخذ عشان تبعثها على اليابان؟	قديش بتوخذ حق إرسالها لليابان؟
أكيدا التي تتحدث معك ، أنا عندي حجز مائدة في تمام الساعة السادسة والثلث هذا المساء . ولكني آسفة لأني سأصل متأخرة نصف ساعة .	أكيدا يلي بتحكي. عندي حجز طاولة عالساعة ستة و ثلث المسا. بس آسفة لإني رح أوصل متأخرة نص ساعة.	أكيدا اللي بتحكي معك، أنا عندي حجز طاولة الساعة ستة والثلث المسا. بس آسفة لأني رح أتأخر نص ساعة.
متي سنستقل القارب ؟	متى بدنا نركب القارب؟	متى رح نركب القارب؟
أرغب في غرفة بحمام .	بدي غرفة بحمام.	بدي غرفة مع حمام.
معذرة , متي ينتهي هذا الفيلم ؟	عفواً, متى بخلص هذ الفلم؟	معذرة, متى بخلص هاد الفلم؟
لقد تمكنت من تحقيق ذلك .	قدرت أوصل لهذا الشي.	قدرت أعمل هيك.
هل هو طريق طويل ؟	هو الطريق طويل؟	هو طريق طويل؟
ما هي الأنواع التي لديكم ؟	شو الأنواع اللي عندكم؟	شو الأنواع اللي عندكم؟
سأرتبك . هل تمانع في رسم خريطة لي ؟	رح أرتبك. ما عندك مشكلة ترسملي خريطة؟	راح أوبك. عندك مشكلة رسم خريطة؟
لدينا جمبري رائع جداً اليوم .	عنا جمبري مميز كثير اليوم.	عنا جمبري حلو كثير اليوم.
هل لديك أيّ خرائط بسيطة للمدينة ؟	عندي أي خرايط بسيطة للمدينة؟	عندك خرافات بسيطة للمدينة؟
معذرة أريد الذهاب إلى فندقي في المدينة بالحافلة . أين يمكن أن أستقل حافلة ؟	عفواً، أنا بدي أروح على الفندق موجود بالمدينة بالباص. من وين بقدر آخذ باص؟	معذرة بدي أروح على فندقي بالمدينة بالباص. وين بقدر أركب باص؟
شكراً . لكنني لا أعتقد أن عندي وقت للإقامة لمدة ليلتين . هل يمكنك حجز غرفة بسريرين لي في ذلك الفندق ليلة الثاني عشر من مارس فقط ؟	شكراً ، بس ما بتوقع أنه معي وقت عشان أظل ليلتين. ممكن تحجزلي غرفة مزدوجة في الفندق لليلة اثنعش ثلاث بس؟	شكرا. بس ما بتوقع انه عندي وقت أحجز غرفة لثنعش بس. بتقدر تحجزلي غرفة بسريرين في هاد الفندق لثنعش بس ؟
بالتأكيد . كيف يمكننا خدمتك ؟	أكيد. كيف منقدر نخدمك؟	أكيد. كيف بنقدر نساعدك؟
شيكات سياحية . شكراً . خذ تذكرتك وبطاقة المرور للصعود على متن الطائرة . كن هناك قبل وقت الرحلة بساعة من فضلك .	شيكات سياحية. شكراً. أخذ تذكرتك و الفيزا عشان تطلع على الطيارة. كون هناك قبل الرحلة بساعة لو سمحت.	شيكات سياحية. شكراً. خذ تذكرتك وبطاقة المرور عشان تطلع على الطيارة. إكن هناك قبل الرحلة بساعة.
أوافق . يجب أن تصبح طبيعية جداً .	أنا موافق. لازم تصير طبيعة كثير.	أوافق. لازم تكون طبيعية كثير.
أهذه عيادة إف ؟	هاي عيادة إف؟	هاي عيادة إف؟
هل لك أن تغيرهم إلى دولارات من فضلك ؟	ممكن تحولي اياهم لدولارات، لو سمحت؟	ممكن تغيرهم على دولارات لو سمحت؟
حسناً . أراك الساعة الثانية يوم الأحد .	تمام . بشوفك الساعة ثنتين يوم الأحد.	ماشي. بصير اشوفك الساعة ثنتين يوم الأحد.
هل يمكنك أن تشذب شاربي ؟	ممكن لو سمحت ترتبلي شواربي؟	بتقدر تشيل شاربي؟
أود أن أصرف هذا الشيك بسبعين دولاراً .	بدي أصرف هاذ الشيك بقيمة سبعين دولر.	بدي أصرف هاد الشيك بسبعين دولار.
الجزء المكتوب بالطريقة المائلة يشير إلى التغييرات التي حدثت في التسعينات .	الجزء اللي مكتوب بالطريقة المايلة بدل على التغييرات اللي صارت بالتسعينات.	الجزء المكتوب بالطريقة المائلة بيحكي عن التغييرات اللي صاروا في التسعينات.
هل تشمل هذه الرحلة زيارة لبرج سيرز ؟	بتشمل هاي الرحلة زيارة لبرج سيرز؟	هاي الرحلة بتشمل زيارة لبرج سيرز؟
أين ستنتهي الجولة ، ومتى ؟	وين راح تخلص الرحلة، و أميت؟	وين رح تكمل الجولة، ومتى؟
تفضل هذان دولاران . احتفظ بالباقي .	تفظل هي دولرين. خلي الباقي إلك.	تفضل هذول دولارين.خلي الباقي معك.
هل يوجد أي محل متعدد الأقسام قريب من هنا ؟	في أي مول قريب من هون؟	في محل متعدد الأقسام قريب من هون؟
هل ستزال تعمل جدول المواعيد ؟	هل رح تظل جدول المواعيد شغّالة؟	رح تعمل جدول المواعيد؟
سوف آخذ هذه ، من فضلك .	راح آخذ هاظ ، لو سمحت.	راح آخذ هاي، لو سمحت.
يقولون أن اليابان دولة غنية جداً .	بقولوا أنه اليابان بلد غني.	بحكوا إن اليابان دولة غنية كثير.
ملعقتين , من فضلك .	معلقتين , لو سمحت.	ملعقتين, لو سمحت.
أجل ، واحدة فقط . متى سأعرف ؟ وكيف سيتم تعويضي ؟	أها، بس وحدة؟ متى رح أعرف؟ وكيف رح يكون التعويض؟	أه، بس وحدة بس. متى رح أعرف؟ وين رح تعطيني تعويض؟
هناك ، أمام بيانات السائح تماما .	هناك ، قدام بيانات السايح بالزبط .	هناك ، أمام بيانات السائح.
أين أجد الاسطوانات المدمجة ؟	وين بلاقي السيديات؟	وين بلاقي الاسطوانات المدمجة؟
أنا متأثر للغاية , لا أستطيع البقاء ساكنا .	أنا متأثر كتير, ما قادر أضل ساكت.	أنا متأثر كثير, ما بقدر أضل.
هل هو قريب لنصل إليه سيراً .	هو قريب عشان نوصلو مشي؟	هو قريب رح نوصله مشي؟
إني من إسبانيا .	أنا من إسبانيا.	أنا من اسبانيا.
ـ أين أقرب محل جزارة ؟	وين أقرب لحام؟	وين أقرب محل جزارة؟
أود تأجير هذا الطراز من السيارات لمدة أربعة وعشرين ساعة .	بدي أستأجر هاذ الموديل من السيارات لمدة أربع وعشرين ساعة.	بدي أأجر هاد النوع من السيارات لمدة أربعة وعشرين ساعة.
لا يمكن أن أبيع هذه دون روشتة .	ما بقدر أبيع هاي بدون وصفة طبية.	ما بقدر أبيع هاي بدون روشتة.
هل لديك صحف يابانية ؟	عندك جرايد يابانية؟	عندك صحف يابانية؟
هل هذا الحذاء متين ؟	هاذ البوط قوي؟	هاذ الحذاء متين؟
لكنّي لدى موعد لرؤيتها في السّاعة الثّانية .	بس أنا عندي موعد عشان أشوفها الساعة ثنتين.	بس عندي موعد اشوفها الساعة ثانية.
هل لديك غرف أكبر ؟	عندك غرف أكبر؟	عندك غرف أكبر؟
اعطني عامل التليفون من فضلك .	إعطيني عامل التلفون لو سمحت .	اعطيني عامل التلفون لو سمحت.
ظننت أنكم أيها الشباب تأكلون الكعك المخبوز فقط .	فكرت إنكو يا شباب بتوكلوا الكعك المخبوز بس.	ظننت إنكم يا شباب بتأكلو الكعك المخبوز بس.
أريد استئجار كرسي مركب .	بدي أستأجر كرسي اتمدد عليه.	بدي أستأجر كرسي مركب.
أنا أبحث عن شيء أنيق .	أني بدور على اشي لايق.	أنا بدور على اشي حلو.
حسناً . هل يجب أن أقوم بتركيزها ؟	ماشي. لازم أساويها مركزة؟	ماشي. لازم أتركيزها؟
قهوة مع القشدة والسكر ، من فضلك .	قهوة مع القشطة والسكر، لو سمحت.	قهوة مع القشدة والسكر، لو سمحت.
سوف ننتظر . من فضلك اتصل بنا عندما تكون مستعداً .	رح نستنى . لو سمحت, إتصل فينا لما تكون جاهز.	راح نستنى. لو سمحت رنلي عشان تكون مستعد.
فقط سياحة .	بس للسياحة.	بس سياحة.
أحتاج إلى طيب .	بدي دكتور.	بدي طيب.
إن الجونلات القصيرة ومعها الأحذية الطويلة لن تنقضي موضتها .	مش ممكن تخلص موضة التنانير القصيرة مع الجزم الطويلة.	الجونلات الطويلة ومعها الأحذية الطويلة ما رح تنقضي موضتها.
ألا ترغب في فنجان شاي ؟	ما بدك تشرب كاسة شاي؟	ما بدك فنجان شاي؟
ليس تماماً . فقط شيء ما غير غالي الثمن .	مش هيك. بس إشي مش غالي.	مش هيك. بس اشي غالي.
إذا كنت تودّ ، بإمكاننا الاستراحة هنا .	إذا إنت حاب، ممكن نستريح هون.	إذا كنت بدك، بنقدر نستنى هون.
هل هذه كلها هي حقائبك ؟	هاي كلها شناتيك؟	هاي كلها شناتيك؟
هل تريد بالحلويات ؟	بدك حلويات؟	بدك بالحلويات؟
نعم ، لكن ليس قويا جدا .	اه ، بس مش قوي كثير.	اه، بس مش قوي كثير.
ويسكي وماء ، من فضلك . هل لديكم وجبة خفيفة معه ؟	ويسكي ومي، لو سمحت. عندكم سندويشة صغيرة او شيء خفيف معه؟	ويسكي و مي، لو سمحت. عندكم وجبة خفيفة معه؟
أتعرف كاثي ؟ إنه عيد ميلادها .	بتعرف كاثي؟ هاي حفلة عيد ميلادها.	بتعرف كاثي؟ عيد ميلادها.
أود تحميض هذا الفيلم . متي سيكون جاهزا ؟	بدي أحمض هالفلم. متى رح يكون جاهز؟	بدي أتحمض هاد الفلم. متى رح يكون جاهز؟
تشغل أشخاصاً جدد في أبريل .	رح توظف ناس جداد في نيسان.	بتشغل أشخاص ثانيين في أبريل.
سأكون سعيدا بذلك . متى ترغب في ذلك ؟	رح اكون مبسوط لهالشي. متى بدك ياه؟	رح أكون مبسوط هيك؟ أميت بدك هيك؟
رائع .	بجنن.	حلو.
من فضلك اتجه يساراً عند التقاطع التالي .	لو سمحت روح عاليسار بالتقاطع الجاي.	لو سمحت روح شمال عند التقاطع الثاني.
هلا أريتني بعض الفساتين ؟	ممكن توريني شوي من الفساطين؟	ممكن تفرجيني شوية فراطة؟
أين المقهى ؟	وين الكوفي شوب ؟	وين المقهى؟
لا يمكنك جلب الألعاب النارية إلى كندا .	ما بتقدر تجيب ألعاب نارية على كندا.	ما بتقدر تاخد الألعاب النارية على كندا.
اعتقد أن هذا عالي قليلا بالنسبة لي .	بتوقع أنه شوي عالي بالنسبة الي.	بتوقع انه هاد عالي شوي بالنسبة إلي.
لم يعد بإمكانك حقيقةً أن تقوم بعمل تصميم دون كمبيوتر بعد الآن .	بطلت تقدر تعمل تصميم بدون كمبيوتر من هون و طالع.	ما بتقدر تعمل تصميم بدون كمبيوتر بعد هسا.
أريد اسطوانة مدمجة .	بدي سي دي.	بدي اسطوانة مدمجة.
هل يمكنني حجز غرفة بسريرين تطل على المحيط ؟	بصير أحجز غرفة بتختين بطل على البحر؟	بقدر أحجز غرفة بسريرين بتطل على المحيط؟
مايومي , هل تسمح أن تملأ هذه الورقة بتوقيعك ؟	مايومي، ممكن تعبيي هاي الورقة بتوقيعك؟	مايومي, بتقدر تعبي هاي الورقة بتوقيعك؟
هلا أرشدتني إلى مطعم مفضل بين الشبان ؟	ممكن ادلني على مطعم معروف بين الشباب؟	بتقدر تدلني على مطعم محبوب بين الشباب؟
حجزنا مقعداً ليوم الخامس والعشرين من أكتوبر في الساعة الحادية عشر صباحاً .	حجزنا مقعد لخمسة و عشرين من شهر عشرة الساعة احدعش الصبح.	حجزنا مقعد ليوم خمسة وعشرين من شهر خمسة الساعة اثنعش الصبح.
إن الناس ودودون جداً .	الناس حابيين كثير.	الناس كثير طيبين.
متى يتعين علي أن أكون في المحطة ؟	أي وقت لازم أكون بالمحطة؟	متى لازم أكون بالمحطة؟
ليس هذا صحيحاً . أنت دائما تعاملني .	هاظ مش صحيح . إنت دايما بتعاملني.	مش هاد صحيح. انت دائما بتتعامل معي.
ما نوع العصير الذي تفضله ؟	شو نوع العصير اللي بتحبه ؟	شو نوع العصير اللي بتحبه؟
هل لي في بعض الفلفل ؟	ممكن أخذ شوي فلفل؟	ممكن شوية فلفل؟
احتاج إلى بعض الهدايا التذكارية من نيويورك .	أنا بدي شوية هدايا تذكارية من نيويورك.	بدي شوية هدايا من نيويورك.
اسمي " تارو تاناكا " لدي حجز مسبق .	اسمي " تارو تاناكا " عندي حجز من قبل.	اسمي "تارو تاناكا" عندي حجز قبل شوي.
إنها الثالثة والربع .	الساعة ثلاثة وربع.	الساعة ثلاث وربع.
كم التكلفة كلها ؟	قديش الكلفة كلها؟	قديش بكلف كلها؟
لا أدري كم من النقود يجب علىّ تركه كبقشيش ؟	ما بعرف قديش لازم أترك بغشيش.	ما بعرف كم من المصاري لازم أترك كبقشيش؟
سآخذ شيكولاتة ساخنة .	بدي آخذ هوت شوكليت.	راح آخذ شيكولاتة ساخنة.
ماذا تنوي أن تفعل عقب الانتهاء من المدرسة . ؟	شو بتخطط تعمل بعد ما تخلص مدرسة؟	شو بدك تعمل بعد ما تخلص من المدرسة؟
أشعر بالغثيان .	بحس حالي بدي أتقيء.	حاس حالي غثيان.
ماذا ؟ هل عليك دفع ضرائب عندما يكون لديك أكثر من ثلاثة زجاجات كحول ؟	شو؟ عليك ضرايب بس يكون عندك أكثر من ثلاث قناني كحول؟	شو؟ بتقدر تدفع ضرائب لما عندك أكثر من ثلاث قزازات كحول؟
لقد حصلت على بطارية فارغة .	بطاريتي صارت فاضية.	أخذت بطارية فارغة.
معذرة . أنا طالب جامعي من اليابان . هل أنتم طلاب في جامعة نيويورك ؟	معلش، أنا طالب جامعي من اليابان. إنتوا طلاب بجامعة نيو يورك؟	معذرة، أنا طالب جامعي من اليابان. انتتم طلاب جامعة نيويورك؟
من الذي يعزف ؟	مين اللي عم يعزف؟	مين اللي بعزف؟
معطف رائع . هل هو صناعة بريطانية ؟	جاكيت حلو. هاد صنع بريطاني؟	معطف حلو. هو صناعة بريطانية؟
هل لديكم فيلم شفاف ملون ؟	عندك فلم شفاف ملون؟	عندكم فيلم شفاف ملون؟
أين قسم السيدات ؟	وين قسم النسوان؟	وين قسم السيدات؟
جميل الفستان التي ترتدينه .	حلو الفسطان اللي لابسيته.	حلو الفستان الي بدك ياه.
تموج شعر دائم مشدود من فضلك .	كيرلي عطول مشدود، لو سمحت.	تموج شعر دائم مشدود لو سمحت.
هل لدينا وقت كاف لإنهاء إجراءات المغادرة ؟	معنا وقت كافي لنخلص إجراءات المغادرة؟	عنا وقت كاف حتى نكمل إجراءات المغادرة؟
هل هناك جولة بالحافلة تجوب المدينة ؟	في دورة بالباص نلف بالبلد؟	في جولة بالباص راح تجوب المدينة؟
هل أستطيع الحصول على تذكرة متعددة الاستخدام ؟	ممكن أوخذ بطاقة ذكية؟	بقدر أجيب تذكرة متعددة الاستخدام؟
كان فيلم " حرب الكواكب " أكثر الأعمال شعبية عام ألف وتسعمائة وأربعة وثمانون .	كان فيلم "حرب الكواكب" من أشهر الأفلام سنة ألف وتسعمائة وأربعة وثمانون.	كان فيلم " حرب الكواكب " أكثر الأعمال شعبية عام ألف وتسعمية وأربعة وثمانين.
أوه ، يجب أن تخطر القنصلية على الفور .	أوه، لازم تبلغ القنصلية هسا.	أه، لازم تخطر القنصلية فوراً.
هل يوجد ملهى ليلي جيد به عرض رقصة الفلامنكو ؟	في نايت كلوب رايق عنده رقصة الفلامنكو؟	في ملهى ليلي كويس بهعرض رقصة الفلامنكو؟
لماذا لم تقلع الرحلة ؟ أخبرني عما يجري .	ليش ما طلعت الرحلة؟ قلي شو بصير.	ليش ما وقفت الرحلة؟ إحكيلي عم صار.
سأصبح بديناً في حال ما ظللت جالساً هنا آكل باستمرار .	رح أصير ناصح لو استمريت قاعد هون آكل دايما.	رح أكون مليح لو ظللت جالسا هون آكل باستمرار.
هل على السيدات ارتداء فستان سهرة ؟	لازم الستات يلبسن فسطان سهرة؟	على السيدات ارتداء فستان سهره؟
حسنا إذاً ، أريد عصا مضرب أصغر كتلك التي مع جوليا روبرتس .	ماشي يعني، بدي عصاة مضرب اصغر مثل اللي مع جوليا روبرتس.	ماشي، بدي عصا مضرب أصغر من هيك اللي مع جوليا روبرتس.
أريد أن اتصل هاتفياً بالسفارة اليابانية .	بدي أحكي بالتلفون مع السفارة اليابانية.	بدي اتصل تلفون بالسفارة اليابانية.
هل هذه السجائر معتدلة ؟	هاي السقاير معتدلة؟	هاي السجائر معتدلة؟
هل هذا طلب شخص آخر .	هاظا طلب واحد ثاني؟	هاد طلب واحد ثاني.
في حالة إمكان ذلك , احجز منضدة بالقرب من النافذة من فضلك .	لو في امكانية, احجزلي طاولة عند الشباك لو سمحت.	لو سمحت, حجز طاولة قريبة من الشباك لو سمحت.
هل يمكن أن نحجز طاولة لخمسة أشخاص ؟	ممكن نحجز طاولة لخمس أشخاص؟	ممكن نحجز طاولة لخمس أشخاص؟
شركة الخطوط الجوية اليابانية ، طائرة رقم واحد اثنان ثلاثة .	شركة الخطوط الجوية اليابانية، رحلة الطيران رقم واحد اثنين ثلاثة.	شركة الخطوط الجوية اليابانية، الطيارة رقم واحد اثنين ثلاثة.
من فضلك اتصل بي في الفندق عندما تجد حقائبي .	من فضلك، كلمني بالفندق لما تلاقي شنطي.	لو سمحت رنلي بالفندق لما تلاقي شناتيي.
ذلك الحد الأدنى للسعر .	هيك أقل سعر.	هاد الحد الأدنى للسعر.
أنت محظوظ .	إنت محظوظ.	انت محظوظ.
هل سيكون هذا المتجر مفتوحاً غداً ؟	راح يكون هاظ المحل فاتح بكرا؟	هاد المحل رح يكون فاتح بكرة؟
وصلت الفاتورة لمائة دولار .	وصلت الفاتورة لمية دولار.	وصلت الفاتورة ل مية دولار.
هل هذا مكتب الاستقبال ؟ هل يوجد عيادة قريبة ؟	هاظ مكتب الاستقبال؟ في عيادة قريبة من هون؟	هاد مكتب الاستقبال؟ في عيادة قريبة؟
كم عمر ابنتك ؟	قديش عمر بنتك؟	قديش عمر ابنتك؟
لن ينضم للجولة الاختيارية إلا القليل من الناس .	ما رح ينضم للجولة الاختيارية غير شوي من الناس.	ما رح ينضم للجولة الاختيارية إلا قليل من الناس.
إنها مجرد هدية تعبيرا عن تقديري .	هاي مجرد هدية تعبير عن تقديري.	هي مجرد هدية عشان أحكيلي عن تقديري.
تحتاج لرؤية أخصائي .	بتحتاج تشوف دكتور متخصص.	بدك تشوف أخصائي.
كم تكلّف هي لكل جالون ؟	كم سعر الغلون الواحد؟	قديش بتكلف هي لكل جالون؟
أيمكنني الحصول على جدول زمني ، من فضلك ؟	ممكن أحصل على جدول الوقت، لو سمحت؟	ممكن أجيب جدول زمني، لو سمحت؟
لقد سُرقت حقيبتي .	انسرقت شنتتي.	انسرق شنتي.
نستخدم الأعواد عندما نأكل .	بنستعمل العيدان لما بنوكل.	بنستعمل الاعواد لما بنأكل.
حسناً ، في حالة إصرار كليكما , سأذهب معكما .	طيب، اذا انتو الاثنين مصرين، أني راح اروح معكو.	ماشي، في حالة إصرار كليكما, راح أروح معكو.
في أي محطة سأنزل للذهاب إلى مبنى إمباير ستيت ؟	بأي موقف لازم انزل عشان أروح على عمارة امباير ستيت؟	بأي محطة راح أنزل عشان أروح على مبنى إمباير ستيت؟
لابد أن تأخذها تسعة وتسعون مرة في اليوم ، قبل الوجبات .	لازم تاخذها تسعة وتسعين مرة باليوم، قبل الأكل.	لازم توخذها تسعة وتسعين مرة باليوم، قبل الوجبات.
لا يا سيدي . هذه الظهيرة محجوزة بالكامل . ومع ذلك يمكن أن تحجز غدا .	لا، يا أستاذ، اليوم بعد الظهر كله محجوز. لكن بتقدر تحجز بكرا .	لا يا سيدي. هاي الظهيرة محجوزة بالكامل. ومع هيك بتقدر تحجز بكرا.
هل هناك طبيب للفندق أو واحد على صلة بالفندق .	في دكتور للفندق أو واحد ع علاقة بالفندق؟	في دكتور للفندق او واحد قريب من الفندق؟
المياه الساخنة ليست ساخنة بالقدر الكافي .	المية الحامية مش حامية بشكل كافي.	المي الساخنة مش ساخنة كثير.
هل استرحت في نومك ؟	ارتحت بالنومة؟	انبسطت نومك؟
أريد إعادة المال . هل يمكن أن أحصل على مالي ؟	بدي أرجع المصاري. بقدر أوخذ مصرياتي؟	بدي أرجع المال. بقدر أجيب مصاري؟
انها باتجاه الجنوب .	هي باتجاه الجنوب.	هي باتجاه الجنوب.
ما سعر تذكرة درجة أولى إلى إدنبره , من فضلك ؟	كم سعر تذكرة درجة أولى لإدنبره , إذا تكرمت.	قديش سعر تذكرة درجة أولى لـ إدنبره, لو سمحت؟
عندي قشعريرة .	عندي قشعيرية.	عندي قشعريرة.
لماذا , شكرا جزيلا . هل أستطيع الارتقاء للقمة ؟	ليش، شكراً كثير الك. بقدر اطلع للقمة؟	ليش, شكرا كثير. بقدر أطلع على القمة؟
لا . هل تحب الإبلاغ عنه ؟	لا . بدك تبلغ عنو ؟	لا. بتحب تخبره؟
من فضلك غير هذه الينات إلى جنيهات .	لو سمحت اصرفلي هظول من ين لقنيه.	لو سمحت غير هاي الينات لجنيهات.
سآخذ مقاعد درجة رجال أعمال ، أليس كذلك ؟	راح آخد مقاعد درجة رجال الأعمال، صح؟	راح آخذ كراسي درجة رجال الأعمال، صح؟
لا أستطيع أن أفعل ذلك , لكني سوف أضعها في الحقيبة لك .	ما بقدر اعمل هيك , بس رح احطها بالشنتة الك .	مش قادر أعمل هيك, بس رح أحطها بالشنطة الك.
إنه غالي الثمن إلى حد ما . ألا يمكنك منحي خصماً ؟	هاد كثير غالي. ما فيك تعطيني شوية خصم؟	كثير غالي. ما بتقدر تعطيني خصم؟
إن " السنة " متقلقلة .	ال"سنة" عم تتقلب.	السنة متقلقة.
سيكون جاهزا بعد غد في المساء .	راح يكون جاهز بعد بكرا المسا.	رح يكون جاهز بعد بكرة المسا.
هل ليدكم صناديق لإرسال الطرود ؟	عندكم علب لارسال الطرود ؟	عندكم صناديق لإرسال الطرود؟
إن عثرت على شيء ، اتصل بي من فضلك .	لو لقيت إشي، رنلي إذا تكرمت.	لقيت اشي، رنلي لو سمحت.
أود تقصيره ببوصة واحدة من هذه المنطقة .	بدي اقصّره بوسطة وحدة من هادي المنطقة.	بدي أصيره ببوصة وحدة من هاي المنطقة.
هل لديكم أي خبز ؟	عندكم خبز؟	عندكم خبز؟
أود بعض البيجامات .	بدي بيجامات.	بدي شوية البيجامات.
أين يمكنني طباعة الفيلم ؟	وين بقدر أطبع الفلم؟	وين بقدر أطبع الفلم؟
أيمكنك الحضور إلى هنا لإصلاحه ؟	ممكن تيجي هون عشان اتصلحه؟	بتقدر تروح هون لإصلاحه؟
أين يمكنني أن أستقل حافلة لمشاهدة المعالم ؟	من وين ممكن اركب باص لحتى اتفرج ع المعالم؟	وين بقدر أركب باص عشان أشوف الأماكن السياحية؟
مرحبا يا سيدة ياماجوتشي ؟ فريقك على الخط . قبلت دعوتك . استمر من فضلك .	أهلا وسهلا يا سيدة ياماجوتشي، فريقك عم يكلمك. رديت على دعوتك. استمري، من فضلك.	مرحبا يا سيدة ياماجوتشي؟ فريقك على الخط. قبلت دعوتك. استمر لو سمحت.
هل لك أن تساعدني في الوصول إلى حقيبتي ؟	ممكن تساعدني ألاقي شنتيتي؟	بتقدر تساعدني حتى أوصل شنتي؟
آسف لقد نفذ هذا الصنف لدينا .	معذرة، هاد النوع خلص عنا.	آسف خلص هاد الصنف عنا.
ما اسم الشخص الذي تود التحدث إليه ؟	شو اسم الشخص اللي بدك تحكي معه؟	شو اسمك اللي بدك تحكي معه؟
لقد اجتزت هذا الاختبار بنجاح كبير .	عديت الامتحان بنجاح كبير .	اجتزت هاد الاختبار بنجاح كبير.
طبقاً لتقرير الطقس ، فإن غداً سيشهد سقوط جليد .	بناءً على النشرة الجوية، راح تثلج بكرا.	طبق لتقرير الطقس، بكرا رح ينزل جليد.
لا أستطيع ضبط اللوحة .	مش قادر أزبط الصورة.	مش قادر أضبط اللوحة.
لا زالت غالية جدا . هل من الممكن أن آخذها بثلاثة دولارات ؟	بعدها غالية كثير. ممكن أشتريها بـثلث دولارات؟	بعدها غالية كثير. ممكن آخذها بثلاث دولارات؟
نريد اثنين هامبورجر واثنين قهوة ، من فضلك ، نريد تناولها خارج المحل .	بدنا زوج همبرجر وزوج قهوة، لو سمحت، بدنا ناكلها برة المحل.	بدنا ثنين هامبورجر و ثنين قهوة، لو سمحت، بدنا نوكلها خارج المحل.
زدني قليلاً .	زيدني شوي.	زدني شوي.
هل لي بشوكة أخرى ؟	بدي شوكة ثانية؟	ممكن بشوكة ثانية؟
أنا هنا في مهمة إعلامية .	أنا هون بشغل إعلامي.	أنا هون بشغل إعلامي.
إنها ليست أحدث طراز ، أليس كذلك ؟	هاي مش أحدث موديل ، صح؟	مش أحدث طراز، صح؟
أبغي بعض الأقراص المنومة .	بدي حبوب منوم.	بدي شوية حبوب المنومة.
أي حافلة تذهب إلى وسط المدينة ؟	أي باص رايح عالدوار الرئيسي؟	أي باص بروح على وسط البلد؟
أريد الذهاب إلى مركز هارفارد . هل يمكن أن تخبرني عندما نصل إلى هناك ؟	بدي اروح على مركز هارفارد. ممكن تقلي لما نوصل هناك؟	بدي أروح على مركز هارفارد. بتقدر تحكيلي لما نوصل هناك؟
أريد أن أحجز على شركة نورث وست إيرلينز على الرحلة رقم صفر ثمانية ستة في الخامس .	بدي احجز على شركة نورث وست إيرلينز على الرحلة رقم صفر ثمانية ستة بخمسة الشهر.	بدي أحجز على شركة نورث وست إيرلينز على الرحلة رقم صفر ثمانية ستة بتاريخ خمسة.
لقد استمتعت بالوجبة كثيراً جداً .	كثير استمتعت بالوجبة.	انبسطت بالوجبة كثير.
سيكون هناك تأخير بسيط .	راح يكون في تأخير بسيط.	رح يكون هناك تأخير بسيط.
فقط إذا كانت ملكك ، سيدي . هاها ، مزحة صغيرة .	بس اذا كانت ملكك ، يا سيدي . ههههههه، هاي مزحة صغيرة.	بس إذا كانت ملكك، سيدي. هاها،مزحة صغيرة.
نستطيع أن نرتب لتنظيف غرفاتكم .	ممكن نرتب معك عشان تنظيف غرفكم.	بنقدر نرتب حتى ننظف غرفتكم.
وما هي المثانة ؟	وشو هي المثانة ؟	شو المثانة؟
لا أستطيع النوم جيداً أثناء الليل .	ما قدرت أنام مليح بالليل.	مش قادر أنام كثير بالليل.
ما هو مستوى مهارتك في عزف الكمان ؟	شو مستواك بعزف الكمان؟	شو مستوى مهارتك ب عزف الكمان؟
ما هي أكثر الأشياء التي تثير اهتمامك الآن ؟	شو أكثر الأشياء اللي بتلفت انتباهك هسا ؟	شو أكثر الاشياء يلي بتعجبك هسا؟
اجعل قصة الشعر تتدلى لأسفل , من فضلك .	خلي قصة الشعر تنزل لتحت، لو سمحت.	حط قصة الشعر عالأسفل, لو سمحت.
هل لك أن تستدعي لي سيارة أجرة الساعة الثامنة صباح غد ؟	ممكن تجيبلي تكسي بكرا الساعة ثمنية الصبح؟	ممكن تطلبلي تكسي الساعة ثمانية بكرا الصبح؟
هلا ملأت هذا النموذج ؟	ممكن تعبي هاذ النموذج؟	ممكن تعطيني هاد النموذج؟
أيمكنك الانتهاء من ذلك بعد عشر دقائق ؟	بتقدر تخلص هاي بعد عشر دقايق؟	بتقدر تكمل هيك بعد عشر دقايق؟
الملح من فضلك .	الملح لو سمحت.	الملح لو سمحت.
لقد نمت و لم أتيقظ حين رن منبه السادسة و النصف .	نمت و ما صحيت ع منبه الساعة ستة ونص.	انبليت و ما انبسطت لما رن منبه ستة و نص.
نحن من أكبر موردي أجهزة الميكروكومبيوتر .	إحنا من أكبر موردين لأجهزة الميكرو كمبيوتر .	إحنا من أكبر أجهزة الميكروكومبيوتر.
من فضلك أخبرني كيف أملأ بطاقة النزول إلى البر ؟	لو سمحت قلي كيف أعبي بطاقة النزول للبر؟	لو سمحت احكيلي كيف أملأ بطاقة النزول للبر؟
دجاج محمر ، من فضلك .	دجاج مشوي، لو سمحت.	دجاج محمر، لو سمحت.
أجل ، ولكن هذا كثير جدا ، ولقد شبعت بالفعل .	أيوة، بس هاي كتير كثير ، وأنا صرت أكلت كفاية.	أه ، بس هاظ كثير ، و شبعت بالفعل.
لقد أُغلق علي الباب . هل يمكن أن تفتح بابي , من فضلك ؟	ييي تسكر علي الباب . بتقدر تفتحلي الباب، لو سمحت؟	سكر الباب. بتقدر تفتحلي الباب، لو سمحت؟
بكل تأكيد . سنكون سعداء لفعل هذا .	أكيد. راح نكون مبسوطين نعمل هيك.	أكيد. رح نكون متحمسين تعمل هيك.
يقولون إن الأنفلونزا منتشرة هناك .	بيقولوا انو الإنفلونزا معمية هنيك.	بحكوا إن الأنفلونزا منتشرة هناك.
هل ستدفع شركة الطيران رسوم الفندق والوجبات ؟	رح تدفع شركة الطيران رسوم الفندق والوجبات؟	رح تدفع شركة الطيران رسوم الفندق والوجبات؟
نسيت تذكرة الطيران الخاصة بي في الفندق .	نسيت تذكرة الطيارة قيتي بالفندق.	نسيت تذكرة الطيران اللي عندي بالفندق.
هل يمكن أن احصل على احدى المجلات أو شيئ من هذا القبيل ؟	ممكن أوخذ وحدة من المجلات أو شي زي هيك؟	بتقدر تعطيني احدى المجلات او شي زي هيك؟
تناسبني تماما .	مناسبيتني كثير.	انسبني كثير.
خذني إلى المستشفى .	خذني على المستشفى.	خذني على المستشفى.
ربما كان يعاني سّدَّة تنفسية .	ممكن عنده صعوبة بالتنفس.	ممكن كان عنده حرارة تنفسية.
كم تكلفة الذهاب إلى فندق سي ؟	قديش بتكلف الروحة لفندق سي؟	قديش بتكلف الروحة على فندق سي؟
هل هناك أي غرف خالية في عربة النوم ؟	ظل في أي غرف فاظية بعرباية النوم؟	في غرفه خالية بالعرباية؟
هل يوجد بوتيك قريب من هنا ؟	في بوتيك قريب من هون؟	في بوتيك قريب من هون؟
عندما أرى الأسعار بهذا الرخص ، يبدو الأمر سخيفاً أن أشتري أي شيء في اليابان .	لما أشوف الأسعار بهالرخص ، بحس أنه مسخرة الواحد يشتري أي شي باليابان.	لما برى الأسعار هاد الرخص، شكله خايف اشتري أي اشي باليابان.
لم يخرج من الماكينة شيء .	ما طلع من الماكينة إشي.	ما طلع من الماكينة اشي.
كم كان ثمنها ؟	قديش كان حقها ؟	قديش سعرها؟
أريد هدية بمناسبة الذكرى السنوية .	بدي هدية لمناسبة الذكرى السنوية.	بدي هدية بمناسبة الذكرى السنوية.
علي أن ألحق طائرة متجهة للوس أنجليس باكر صباح غد .	لازم ألحق طيارة لوس أنجلوس بكرا الصبح بكير.	لازم ألحق الطيارة عالوس أنجليس باكر بكرة الصبح.
يا صاح , أتعرف أي مكان يستحق الرؤية قريبا من هنا ؟	أخوي، بتعرف أي مكان محرز الشوفة قريب من هون؟	يا صاح, بتعرف أي مكان بحب أشوفه قريب من هون؟
عندي الكثير من الوقت .	عندي وايد وقت.	عندي كثير وقت.
من أين يمكنني شراء بعض الهدايا التذكارية ؟	منين بقدر أشتري شوية هدايا تذكارية ؟	من وين بقدر اشتري شوية الهدايا التذكارية؟
أنظر إلى هذا . انظر إلى هذا . سوف تخبرني أن الاختلاف بين هذا الشاب وذلك الشاب هو الحظ ؟ محمد ، يقف بالسيارة في جانب الطريق ، وأنت ؟ لن تمانع في أن أنام معك هنا . أنا متأخر . كان لقاء جميل معك ؟	شوف هاظ. شوف هاظ. راح تحكيلي انو الفرق بين هالشب وهذاك الشب هو الحظ؟ محمد، واقف بالسيارة على زقاق الشارع، وإنت؟ ما راح تعترض اذا قعدت معك هون. انا تأخرت. كان لقاء حلو معك؟	شوف هاد. شوف هاد. رح تحكيلي انه الفرق بين هاد الولد و هاد الولد هو الحظ ؟ هاد ، بوقف بالسيارة جنب الطريق ، وأنت ؟ ما تمانع أنام معك هون. أنا متأخر. كان حلو معك ؟
أعمل في شركة تجارية .	أني بشتغل بشركة تجارية.	بشتغل بشركة تجارية.
أفهم ، لكن لا أستطيع أن أقولها .	فاهم، بس بقدر أقولها.	فهمت، بس ما بقدر أحكيها.
نصف زجاجة , من فضلك .	نص قنينة ، لو سمحت.	نص قزازة, لو سمحت.
متى تقام مباراة كرة القدم ؟	متى بتبلش مباراة كرة القدم؟	متى بصير تلعب مباراة كرة القدم؟
ما هو متوسط أسعاركم للفاكس الدولي كل شهر ؟	كم معدل تكلفة الفاكس الدولي كل شهر؟	قديش أسعاركم للفاكس الدولي كل شهر؟
انتظر دقيقة من فضلك .	استنى دقيقة لو سمحت.	استنى دقيقة لو سمحت.
هل هو محجوز بالكامل ؟	هو محجوز كله؟	هو محجوز كامل؟
شيء خطأ مع حقيبتك .	اشي غلط بشنتك .	إشي غلط مع شنتتك.
كلا منا يريد أن يحاسب على وجبته .	إحنا كل واحد بدو يدفع عن أكلته.	كل واحد بدنا يحاسب على وجبته.
ألم تتلق الاستمارة بالطائرة ؟	ما أخذت الاستمارة بالطيارة؟	ما بتلق الاستمارة بالطيارة؟
هل لديك أي شيء لفترة أطول قليلاً ؟	عندك أي اشي لوقت أطول شوي؟	عندك إشي لفترة أطول شوي؟
أجل ، من فضلك أرسله إلى الغرفة اثنا عشر أربعة وثلاثون .	أيوه، لو سمحت وديه على الغرفة اثنعش أربعة وثلاثين.	أه، لو سمحت ابعثه على الغرفة اثنعش اربعة وثلاثين.
أين البحيرة ؟	وين البحيرة؟	وين البحيرة؟
هل هناك حافلة تذهب مباشرة إلى هناك ؟	في أي باص بروح هناك مباشرة؟	في باص رايح مباشرة لهناك؟
أريد هذا الطراز لخمسة أماكن مرصعة .	بدي هاي النوعية لخمس أماكن مرصعة.	بدي هاد الطراز لخمس أماكن.
هل لك أن تغلف هذه كالهدية ؟	ممكن تلفلي هاي كهدية؟	بتقدر تغلف هاي مثل الهدية؟
نعم لدينا هذا ، سوف نجهزها لك .	اه موجود عنا. رح نجهزلك اياه.	اه عنا هاظ, رح نجهزك.
هل يمكنك تبديل هذه بواحدة جديدة ؟	ممكن تبدلي هاي بوحدة جديدة؟	بتقدر تبدل هاي بوحدة ثانية؟
عفواً . ستكون جاهزة في غضون خمس دقائق .	عفوا. رح تكون جاهزة خلال خمس دقايق.	عفوا. رح تكون جاهزة خلال خمس دقايق.
أين يمكنني أن أشتري إبريقاً ؟	من وين بقدر اشتري بريق؟	وين بقدر اشتري إبريقا؟
أعتقد أن عمره أكثر من خمسين سنة .	بتوقع عمره اكثر من خمسين سنة.	بتوقع انه عمره أكثر من خمسين سنة.
أود أن أطلب , من فضلك .	بدي أطلب , بعد إذنك.	بدي اطلب, لو سمحت.
معذرة . كيف يمكنني الوصول إلى المصرف ؟	معلش، كيف بقدر أوصل للبنك؟	معذرة، كيف بقدر أروح على المصرف؟
لدي بعض الملابس للمغسلة .	عندي شوية وعية للغسيل.	عندي شوية ثياب للمغسلة.
كريمة وسكر ؟	كريمة وسكر؟	كريمة وسكر؟
هل يوجد أي قطار سريع إلى بوسطن ؟	في أي قطار سريع لبوسطن؟	في أي قطار سريع على بوسطن؟
الحجوزات في السابعة ، تحت اسم مانو .	حجوزات الساعة سبعة، بإسم مانو.	الحجوزات الساعة سبعة، تحت اسم مانو.
أين أفضل مكان لمشاهدة المعالم ؟	وين أحسن مكان لشوفة المناظر؟	وين أحسن مكان حتى نشوف الأماكن الحلوة؟
هل يمكنك أن تريني كيف أضع الغاز ؟	ممكن توريني كيف أحط الغاز؟	بتقدر توريني كيف أحط الغاز؟
علىّ أن أذهب ، سأتصل بك لاحقاً .	أني لازم أروح. رح أحكي معك بعدين.	لازم أروح، رح أتصل معك بعدين.
لا كهرباء .	ما في كهربا.	ما في كهرباء.
ثلاثون دولاراً وثمانون سنتا .	ثلاثين دولار وثمانين سنت.	ثلاثين دولار و ثمانين سنت.
هل تعرف طبيب أسنان جيد ؟	بتعرف دكتور اسنان كويس؟	بتعرف دكتور أسنان كويس؟
هل من الممكن أن أمكث في غرفتي حتى الثانية مساءً ؟	ممكن أظل بغرفتي للساعة ثنتين المسا؟	ممكن أمكث بغرفتي لحد الساعة ثنتين المسا؟
إن حول غرفتي ضجيجا بالغا .	في ضجة كبيرة حوال غرفتي	حول غرفتي ضجة بالغا.
كم ستستغرق لكي تطلب ؟	قديش بدك يعني عشان تطلب؟	قديش بدك تاخد؟
معدتي تؤلمني بعد الوجبات .	معدتي بتالمني بعد الوجبات.	معدتي بتوجعني بعد الوجبات.
نفضل مائدة بجوار النافذة .	بنحب طاولة جنب الشباك.	بنفضل طاولة جنب الشباك.
كنت على رحلة يونيتد إيرلاينز رقم ثمانية اثنان ثمانية .	كنت برحلة يونايتد إيرلاينز الرقم ثمانية اثنين ثمانية.	كنت على رحلة يونيتد إيرلاينز رقم ثمانية اثنين ثمانية.
هل لك أن ترسم لي خريطة , من فضلك ؟	ممكن ترسملي خريطة، لو سمحت؟	ممكن تبعثلي خريطة, لو سمحت؟
هل بإمكاني اللمس ؟	بقدر ألمسه؟	ممكن أشوف؟
يصعب العثور على هذا المكان . إنه في طريق ضيق يتفرع من الطريق الرئيسي .	صعب يلتقى هالمكان. هو بدخلة بتتفرع من الشارع الرئيسي.	بصعب ألاقي هاد المكان. هو بطريق ضيق بتفرع من الطريق الرئيسي.
هلا أخذت هذه السراويل ؟	ممكن توخذ هاي البنطلونات؟	ممكن توخذ هاي السراويل؟
حسنا . إنها تتكلف خمسة وثمانون دولارا في البريد العادي وثلاثة دولارات في التوصيل الخاص .	طيب. بتكلف خمسة وثمانين دولر بالبريد العادي وثلاث دولرات بالتوصيل الخاص.	ماشي، بتكلف خمسة وثمانين دولار بالبريد العادي وثلاث دولارات بالتاكسي.
إذاً يمكنني بكل ثقة أن أزكي برج مدينة سان فرانسيسكو . فهذا يعطيك فكره عن سان فرانسيسكو .	يعني بنصحك عالأكيد ب برج مدينة سان فراسيسكو. رح يعطيك لمحة عن سان فرانسيسكو.	أكيد بقدر أزكي برج مدينة سان فرانسيسكو. هاد بتعطيك فكرة عن سان فرانسيسكو.
لدي تقدير كبير للموسيقى الكلاسيكية .	كثير بقدر الموسيقى الكلاسيكية.	عندي تقدير كبير للموسيقى الكلاسيكية.
من فضلك استعمل غرفة القياس هناك .	من فضلك استخدم غرفة القياس هنيك.	لو سمحت استعمل غرفة القياس هناك.
سر في نفس الاتجاه حوالي خمس دقائق ثم لف لجهة اليسار .	امشي بنفس الاتجاه حوالي خمس دقايق و بعدين ارجع على الشمال.	امشي بنفس الاتجاه تقريبا خمس دقايق بعدين لف ع اليسار.
هل أجعله يعاود الاتصال بك عندما يعود ؟	بتحب أخليه يرجع يرنلك بس يرجع؟	ممكن أخليه يترنلك لما يرجع؟
من المرجح أن محبا للإبداع الفني مثلك سيستمتع اللوحات الزيتية غير التقليدية وعروض الموسيقى بالشوارع .	متوقع من محب للابداع الفني مثلك راح ينبسط باللوحات الزيتية والموسيقى وعروض الموسيقى بالشوارع.	من المفروض انه حدا مثلك رح يعجب اللوحات الزيتية غير التقليدية وعروض الموسيقى بالشوارع.
هل رشحت لي رحلة قصيرة ؟	هل اخترتلي رحلة قصيرة؟	بتقدر تقترحلي رحلة قصيرة؟
إنها سبعة عشر ايه . اوه ، انا آسف . لقد أخطأت .	هي سبعتعشر ايه . اوه ، أني آسف . غلطت	هي سبعطعش ايه. اوه، انا آسف. غلطت.
كم المدة التي قضتها هي حتى الآن في المملكة المتحدة ؟	قديش المدة اللي عاشتها بإنجلترا؟	قديش المدة اللي قضيتها هسا بالمملكة المتحدة؟
هل قرّرتَ ؟	قررت؟	قريت؟
هل نذهب إلى أي مكان متحدثين مثل ذلك ؟	راح نظل نحكي هيك وين ما نروح؟	بدنا نروح على أي مكان متحدثين زي هيك؟
سأذهب كي أسأل البواب عن الأجرة المناسبة .	رايح اسأل البواب عن الأجرة الصحيحة.	راح أروح عشان أسأل البواب عن الأجرة المناسبة.
اللون البني محبب هذا العام .	اللون البني مرغوب هالسنة.	اللون البني محبوب هاد العام.
هناك قطع في بلوزتي . أتساءل هل يمكنك أن تخيطيه لي ، من فضلك ؟	في مزع ببلوزتي. بدي اسألك اذا بتقدر تخيطلي اياه، لو سمحت؟	في قطع بلوزتي. بفكر بتقدر تخيطلي، لو سمحت؟
هل هذه هي آخر محطة ؟	هاظا آخر موقف؟	هاي اخر محطة؟
هل يمكنني تركها في أي مكان من البلاد ؟	بقدر أسيبها بأي مكان بالبلد؟	بقدر اتركها بأي مكان من البلاد؟
أريد بعض التفاح ، من فضلك .	بدي شوية تفاح، لو سمحت.	بدي شوية تفاح، لو سمحت.
أخشى أن لا يكون هنا أية دورة لتعليم الجولف .	خايف ما يكون في دورة لتعليم الجولف	خايف ما يكون هون دورة تعليم الجولف.
دعني أحول هذه المكالمة إلى المسئول .	خليني أحوّل هاي المكالمة للمسؤول.	خليني أحول هاي المكالمة للشخص المسئول.
هل يمكن أن تحجزوا في العرض ؟	ممكن تحجزولي بالعرض؟	ممكن تحجزوا بالعرض؟
أنا أقيم في فندق هيلتون .	أنا قاعد بفندق الهلتون.	أنا ساكن بفندق هيلتون.
أحب هذه الخدمة بتقديم شامبانيا للتحية بعد الإقلاع . دعني أشرب فى صحتك .	بحب هاي خدمة توزيع شامبانيا للترحيب بعد ما نطير. خليني أشرب بصحتك.	بحب هاي الخدمة بتعطيني شامبانيا بعد ما أطير. خليني أشرب معك.
ما هو الحد الأدنى للعمر لفعل ذلك ؟	إيش أقل عمر مسموح يعمل هيك؟	قديش الحد الأدنى للعمر حتى تعمل هيك؟
إلى فندقي ، من فضلك ، إن عنوان فندقي في هذه الورقة .	للفندق تبعي، لو سمحت، العنوان تبع الفندق ع هالورقة.	لفندقي، لو سمحت، عنوان الفندق في هاي الورقة.
أريد لقاء السيد ويليم .	بدي أشوف الأستاذ ويليم.	بدي أشوف السيد ويليم.
النبيذ ليس باردا بشكل كافي . هل نمكنك أن تجعله أكثر برودة ؟	الواين مش بارد كفاية. ممكن تبرده اكثر؟	النبيذ مش بارد بشكل كافي. بتقدر تبدله برودة؟
بكم هذا العطر ؟	بقديش هاظا العطر؟	بكم هاد العطر؟
بالتأكيد سوف ترسلهم ، أليس كذلك ؟	أكيد راح تبعتثم، صح؟	اكيد رح ترسلهم، صح؟
أسف ، هذا المكان محجوز بالفعل .	آسف، هاذ المكان محجوز فعلاً.	أسف، هاد المكان محجوز بالفعل.
من فضلك أعطني بعض النقود الفكة .	لو سمحت أعطيني شوية فراطة.	لو سمحت أعطيني شوية الفكة.
لا أعرف شيئاً عن هذا الأمر .	ما بعرف إشي عن هالشغلة.	ما بعرف اشي عن هاد الموضوع.
حفلتك مقامة الآن . تفضل .	حفلتك مبلشة هسا. تفظل.	حفلتك مشهورة هسا. تفضل.
أخطط للبقاء لمدة اثنا عشر يوماً .	بخطط أظل اثنعشر يوم.	بدي اظل لمدة اثنعش يوم.
يوجد الكثير من السائحين بالقرب من المبنى ، ويبدو أنهم تجمعوا لإلقاء نظرة على ما يحدث .	في كتير سواح حوالين البناية، شكلهم متجمعين عشان يشوفوا شو اللي بصير.	في كثير من السائحين قريب من المبنى، شكلهم تجمعوا عشان يفرجوا شو بصير.
هل لك أن تقدر التكلفة قبل أن تبدأ العمل فيها ؟	ممكن تقدر قديش بكلف قبل ما تبدا شغل فيه؟	ممكن تقدر التكلفة قبل ما تروح تعمل؟
نعم . تم نقل أمتعة شخص آخر إلى غرفتي تواً . من فضلك ، هل من الممكن أن تقوم بفحصها ؟	اه، في شناتي لحدا ثاني وصلت غرفتي هسا.لو سمحت، ممكن تشوفها؟	اه. نقلت شنات ثاني عالغرفة. لو سمحت, بتقدر تشوفها ؟
أريد أن أحصل على تعويض لذلك .	أنا بدي اوخد تعويض عن هاظ.	بدي أجيب تعويض لهيك.
بالتأكيد , كن على راحتك .	أكيد، كون على طبيعتك	أكيد, خلي راحتك.
إن ثمة خطأ ما في بطاقة المفتاح هذه ، أعطني غيره ، من فضلك .	فيها غلطة شكلها بالكارت هاي، عطني وحدة ثانية، الله يخليك.	في غلط في بطاقة المفتاح هاي، أعطيني غيره، لو سمحت.
من فضلك اتصل لي برقم ثلاثة اثنان ستة اثنان تسعة واحد ثمانية .	لو سمحت، رنلي على الرقم ثلاثة اثنين ستة اثنين تسعة واحد ثمانية.	لو سمحت رنلي رقم ثلاث اثنين ستة اثنين تسعة واحد ثمانية.
أين مدخل مترو الأنفاق ؟	وين دخلة المترو؟	وين مدخل مترو الأنفاق؟
معذرة . ولكني أريد تسليم تقرير السرقة .	معلش، بس بدي أسلم تقرير السرقة.	معذرة، بس بدي أسلم تقرير السرقة.
هذا المقاس ، الذي تسميه المقاس العادي ، سوف تجده هنا .	هاذ الحجم ، اللي بتسميه حجم عادي، راح تلاقيه هون .	هاد المقاس، اللي بسميه المقاس العادي، راح تلاقيه هون.
إنه رديء الصنع .	هو مش صنوع منيح.	هو رديء الصنع.
هل يمكن أن تخبرني عن ساعات العمل ؟	ممكن تحكيلي عن ساعات الشغل؟	ممكن تحكيلي عن ساعات العمل؟
اعطني شهادة طبية , من فضلك .	عطيني وصفة طبية ، لو سمحت .	اعطيني شهادة طبية, لو سمحت.
ليس معي فكة صغيرة .	ما معي فراطة.	ما معي فكة صغيرة.
هل يمكن أن أرى هذا ؟	ممكن أشوف هاظا؟	بقدر اشوف هاد؟
ليس لدى أي شئ لكي أعلنه .	ما عندي أي اشي عشان أعلنه.	ما عندي اشي عشان أعلنه.
أعتقد أنني تركت كاميرتي وغادرت عندما كنت أتناول العشاء هنا الليلة الماضية .	بظن اني تركت كميرتي و روحت لما كنت اكل هون امبارح عالعشا.	بظن اني تركت كاميرتي وطلعت لما كنت أشرب العشا هون الليلة الماضية.
دعنا نجتمع لنبحث الأمر أكثر .	خلينا نلتقي عشان اناقش هاظ الموضوع أكثر.	خلينا نجتمع عشان ندور الموضوع أكثر.
هيه ، هذا فستان جميل حقا .	مرحبا ، هاذا فعلا فسطان حلو.	هيه، هاد فستان حلو كثير.
من فضلك كن صديقي بالمراسلة .	من فضلك, كون صاحبي عالتواصل.	لو سمحت نادي صاحبي بالمحادثة.
أعطني خمسين ، من فضلك .	اعطيني خمسين ، إذا سمحت.	أعطيني خمسين، لو سمحت.
ما هذا المكان الذي نمر به الآن ؟	شو هالمكان اللي بنمر فيه هسا؟	شو هاد المكان يلي بنمره هسا؟
هل لي في استعارة بعض البياضات ؟	ممكن أستعير شرارشف؟	ممكن أستعير شوية البياضات؟
أوه , يبدو كأنه قرعة .	أوه، شكله قرعة .	أه, شكله كأنه قرعة.
اشعر كأن هناك تحديق في . هل من النادر رؤية شخص ياباني ؟	حاسك بتسرح فيه. لهاي الدرجة قليل تشوف واحد ياباني؟	حاس حالي كأنه هناك تحديق. النادر أشوف حدا ياباني ؟
سنبعث لك بالبريد عشرين عينة إضافية .	رح نبعتلك عالبريد عشرين عينة زيادة.	رح نبعثلك بالبريد عشرين عينة زيادة.
إن الرصيف رقم خمسة يقع هناك .	الرصيف رقم خمسة موجود هناك.	الرصيف رقم خمسة موجود هناك.
أين يوجد مكان لطيف لقضاء نزهة ليوم واحد ؟	وين بلاقي مكان لطيف أظل فيه رحلة ليوم واحد؟	وين في مكان حلو لقضاء نزهة ليوم واحد؟
يا سيد كاواي لدينا مائدة لك الآن . تفضل من هنا .	يا أستاذ كاواي، عنا طاولة الك حاليا. تعال من هون.	سيد كاواي عنا طاولة لك هسا. تفضل من هون.
لا توجد مشكلة . إذا حضرت في الخامس من سبتمبر ، فسيكون بإمكانك الاستمتاع بعرض فيلم علمي لأن عندنا يوماً خاصاً مفتوحاً أول يوم جمعة من كل شهر .	ما في مشكلة. اذا اجيت بخمسة تسعة ، بتقدر تستمتع بالفلم العلمي لأنه احنا عنا يوم مميز مفتوح بأول جمعة من كل شهر.	ما في مشكلة. اذا حضرتت ب خمسة من شهر خمسة، بتقدر تشوف فلم علمي لأنه عندنا يوم خاص مفتوح أول يوم جمعة من كل شهر.
هل بإمكاني الحصول على طبق آخر مثل هذا ؟	بقدر آخذ صحن ثاني مثل هاذ؟	بقدر اخد طبق ثاني زي هاد؟
لا تهتم . على أي حال ، خذني من فضلك إلى مركز الحي الصيني . سأحاول أن أجده بنفسي .	ما تشيل هم. يلا، خذني لو سمحت لمركز الحي الصيني. راح احاول ادور الجهة وحدي.	ما تهتم. على كل حال، خذني لو سمحت على مركز الحي الصيني. رح أحاول أرجع بنفسي.
أهه ، هيا . دولارين فقط .	اها، يلا. بس دولارين.	أهه، يلا. دولارين بس.
سندويتشان برجر بالجبن ، من فضلك .	اثنين برجر بالجبنة، لو سمحت.	سندويشة برقر بالجبن، لو سمحت.
أرغب في كريم مسائي للبشرة .	بدي كريم ليلي للبشرة.	بدي كريم مسائي للبشرة.
متى سنقلع ؟	أميت راح نقلع؟	متى رح نقلع؟
هذا طيب ، على ما يبدو .	هاذ طيب ، من شكله.	هاد طيب، على ما يبدو.
حسنا , الوقت متأخر إلى حد ما . أعتقد أنني يجب على أن أغادر الآن . شكرا جزيلا لك على الأمسية الرائعة .	ماشي, الوقت صار متأخر شوي. بظن انو لازم اروّح هسا. كتير شكرا على الليلة الممتعة.	ماشي, الوقت متأخر شوي. بتوقع لازم أروح هسا. شكرا كثير الك على الأمسية الحلوة.
لقد سقطت من على درجات السلم .	وقعت من على درج السلم	وقعت من على درجات السلم.
هذه السن في المقدمة تؤلمني .	هالسنة في الامام بتوجعني.	هاي السن بالقدمه بتوجعني.
من أي نوع من الجلد الصناعي صُنعت حقيبة السفر هذه ؟	شو نوع الجلد الاصطناعي المصنوع منه شنطة السفر هاي؟	شو نوع الجلد الصناعي اللي بناسب شنتة السفر هاي؟
أين نشأت سمكات الفراش هذه ؟	من وين جاية سمكات الفراش هاي؟	وين نشأت سمكات الفراش هاي؟
سأخطط لإرسال فواتير حاجياتي اليومية ، لذا من فضلك أخبرني العنوان و اسم الشخص المسئول من فضلك .	رح أبعث فواتير حاجاتي اليومية، عشان هيك لو سمحت أعطيني عنوان واسم الشخص المسؤول.	رح أخطط لإرسال فواتير حاجياتي اليومية، عشان هيك لو سمحت احكيلي العنوان و اسم الشخص المسئول لو سمحت.
أريد نسخة من تقرير السرقة .	بدي نسخة من تقرير السرقة.	بدي نسخة من تقرير السرقة.
أريد السفر من شنغهاي إلى هاواي بالباخرة .	بدي أروح من شنغهاي لهاواي عالسفينة.	بدي أسافر من شنغهاي ل هاواي بالخير.
جريدة باللغة الإنجليزية ، لطفاً .	جريدة بالانجليزي، لو سمحت.	جريدة باللغة الانجليزية، لو سمحت.
هل هناك سيارة ليموزين ؟	في سيارة ليموزين؟	في سيارة ليموزين؟
لا أريد واحدة ضخمة .	ما بدي وحدة دفشة.	ما بدي وحدة كبيرة.
أريد فندقاً آمنا يقدم إفطاراً جيدا ، من فضلك ؟	بدي فندق آمن ، بقدم فطور كويس ، لو سمحت ؟	بدي فندق آمن بقدم إفطار كويس، لو سمحت؟
أربعة وعشرين دولاراً . هل تريد المزيد ؟	أربعة وعشرين دولار. بدك كمان؟	أربعة وعشرين دولار. بدك كمان؟
وقعت منى الشوكة . من فضلك أحضر واحدة أخرى .	وقعت مني الشوكة. لو سمحت جبلي وحدة ثانية.	وقعتمنى الشوكة. لو سمحت جيبلي وحدة ثانية.
لاحظ الفجوة ، لاحظ الفجوة ، ثم قرب الأبواب ، من فضلك .	لاحظ الفتحة، لاحظ الفتحة ، بعدين قرب الابواب، لو سمحت.	لاحظ الفجوة، لاحظ الفجوة، بعدين قرب الباب، لو سمحت.
من فضلك ساعدني أعثر على مرشد يتحدث اليابانية .	لو سمحت ساعدني ألاقي دليل سياحي بحكي ياباني.	لو سمحت ساعدني ألاقي مرشد بحكو ياباني.
ماذا عن هذه النماذج البلاستيكة ؟	شو رأيك بموديلات البلاستك هاي؟	شو رأيك بهاي النماذج البلاستيكة؟
دعونا نحتفل ، هكذا قال وآخذني إلى بار . وقال إنه سيُجري مكالمة هاتفية وغادر ولم يعد أبداً وتحملت أنا وحدي عبء فاتورة ضخمة .	"خلينا تحتفل" هيك قال وأخذني على البار. حكى انه رايح يعمل مكالمة وراح وما رجع إجى أبداً وأنا تورطت بفاتورة كبيرة.	خلينا نتحتفل، زي هيك قال وراح يوخذني على بار. وقال إنه رح يرن مكالمة وراح يروح بعدين وانا بتحمل عبء فاتورة كبيرة.
أرغب في خلع أسناني .	أنا حاب أقلع سناني.	بدي خلع أسناني.
أريد منبه ، من فضلك .	بدي منبه، لو سمحت.	بدي منبه، لو سمحت.
ما توقيت إجراءات مغادرة الفندق ؟	متى منقدر نعمل الاجراءات حتى نطلع من الفندق؟	متى بروح عالفندق؟
أريد أن أحصل على استراحة .	بدي أوخذ بريك.	بدي أجيب استراحة.
هذه الغرفة اثنان صفر واحد . أريد أن أطلب إفطار الغد .	هاي الغرفة رقم اثنين صفر واحد. بدي أطلب فطور بكرا.	هاي الغرفة اثنين صفر واحد. بدي أطلب الفطور بكرة.
هل هذا مصنوع من القطن ؟	هاذ مصنوع من القطن؟	هاد مصنوع من القطن؟
ما هو مقدار الرسوم للوزن الزائد ؟	قديش الدفع على الوزن الزايد؟	قديش الرسوم للوزن الزائد؟
لدي معداتي الخاصة .	عندي أدواتي الخاصة.	عندي معداتي الخاصة.
في غرفة انتظار بالمحطة .	في غرفة انتظار بالمحطة.	بغرفة انتظار بالمحطة.
كيف أستطيع مساعدتك ؟	كيف بقدر اساعدك ؟	كيف بقدر أساعدك؟
ادخل . من فضلك ضعها على المائدة هناك .	أدخل. لو سمحت حطها على الطاولة هنيك.	إدخل. لو سمحت حطها على الطاولة هناك.
حسناً . سأتأكد أن حقائبك ستكون هنا .	طيب . راح أتأكد إنه الشناتي رح تكون هون.	ماشي. رح أتأكد إن شناتيك رح تكون هون.
سنأتي في السابعة .	رح نيجي الساعة سبعة.	راح نروح الساعة سبعة.
حقاً . اليوم هو الأحد ، والأحد هو أسوء الأيام .	فعلاً. اليوم الأحد، والأحد أسوأ الأيام.	جد. اليوم هو الأحد ، والثاني هو أسوء الأيام.
إما أن تصلحها أو تستبدلها ، من فضلك .	يا تصلحها يا تبدلها، لو سمحت.	إما تصلحها أو تبدلها، لو سمحت.
ربما أعطيك إجابة أفضل من تلك بعد عرضين .	يمكن أعطيك جواب أحسن من هاذ بعد ما أشوفه مرتين.	ممكن اعطيك إجابة أحسن من هاي بعد عرضين.
إن ارتفاعه ألفان وأربعمائة متر .	إنو ارتفاعه ألفين وأربعمية متر.	ارتفاعه ألفين وأربعمية متر.
هل يمكن أن أستعيد متعلقات ؟	ممكن أرجع متعلقاتي؟	بقدر أرجع اغراض؟
هل بإمكاني إجراء طلبية ؟	بقدر اطلب؟	بقدر أعمل طلبة؟
إنه خطئي . ليس خطأك .	هاي غلطتي. مش غلطتك.	هو غلطي. مش غلطك.
لا يوجد أي منها .	ما في منهم.	ما في اي منها.
أريد غرفة بمنظر جميل .	بدي غرفة مع إطلالة حلوة.	بدي غرفة منظر حلو.
أنا ياباني .	أني ياباني.	أنا ياباني.
هل لديكم دبابيس زينة ذات تصميمات رائعة ؟	عندك بروشات شكلها حلو؟	عندكم دبابيس لونها حلو؟
يبدوا أنني غير قادر على الحصول على الماء الساخن .	شكله مش قادر يجيب ميّة ساخنة.	شكله أني مش قادر أجيب مي ساخن.
هلا وقفت معي لالتقاط صورة ؟	بتقدر توقف معي شوي عشان نصور صورة؟	بتقدر وقف معي حتى أصور؟
لا أعتقد أن ذلك يناسبني فجلدي جاف إلى حد ما .	ما بعتقد انه هاد بلبقلي، جلدي ناشف كثير.	ما بتوقع انه يناسبني، جلدي جاف شوي.
أكون ممتنا جدا لو أخذتني إلى الشاطئ .	راح أكون كثير ممنون لو توخذني لعند الشط.	بكون ممتنا كثير لو أخذتني على البحر.
هل يمكنني الحصول على تذكرتين درجة ثانية لشيكاغوا , من فضلك ؟	ممكن أحجز تذكرتين لشيكاغو من الدرجة الثانية، لو سمحت؟	ممكن أجيب تذكرتين درجة ثانية لشيكاغوا, لو سمحت؟
أجل ، أنا . لقد كانوا يعيشون بجواري في كاليفورنيا لكنهم انتقلوا إلى فلوريدا منذ عامين . ماذا عنك ؟ هل تسافر بمفردك ؟	أيوه، أنا. كانوا عايشين بحدي بكاليفورنيا بس انتقلوا على فلوريدا من سنتين. شو بالنسبة الك؟ بتسافر لحالك؟	أه، أنا. كانوا يعيشو معي في كاليفورنيا بسهم انتقلوا لفلوري قبل سنتين. شو رايك؟ بتسافر وحده؟
أنا من طوكيو .	أني من طوكيو.	أنا من طوكيو.
أي منتجات صوفية أخرى ؟	في منتجات صوف ثانية؟	أي منتجات صوفية ثانية؟
هل من الممكن أن تخبرنا كيف تقيم هذه الخطة ؟	ممكن تحكيلنا كيف بتعمل هاي الخطة ؟	بتقدر تحكيلي كيف بتعمل هاي الخطة؟
مساء الخير . أهلا .	مسا الخير. أهلين.	مسا الخير. أهلا.
اخرج من ذلك الباب ، وانتظر عند المحطة رقم ستة .	طلع من هاي الباب، و انطر عند المحطة رقم ستة.	روح من هاد الباب، و استنى عند المحطة رقم ستة.
سبعاً ، من فضلك .	سبعة، لو سمحت.	سبعة، لو سمحت.
مهزوز ، وليس مضروب .	محرك، مش مخفوق.	مهزوز ، مش مضروب.
ثلاثة أيام .	ثلاث أيام.	ثلاث أيام.
تريد أن تشتري ثوبا .	هي بدها تشتري فسطان.	بدك تشتري ثوب.
لا ، ليس بعد ، هناك الكثير نختار فيه .	لا، بعده ، في كثير عشان تنقي منه	لا، مش هسا، فيه كثير بنختار فيه.
سر في خط مستقيم على طول النهر حوالي نصف ميل . ستصل للمتنزه .	إمشي دغري على طول النهر حوالي نص ميل. بتصل المنتزه.	امشي بخط مستقيم على طول النهر تقريبا نص ميل. راح تلاقي المتنزه.
أسف أنني بحاجة إلى أن أطلع على أي مستند لتحديد الهوية .	أسف أني بحاجة إني أشوف اثبات هوية.	آسف اني بحاجة أطلع أي دليل عشان أعرف الهوية.
كن حذراً ، السقف منخفض .	انتبه ، السقف واطي.	انتبه، السقف منخفض.
كم تتقاضى لتطبيع صور الفيلم ؟	قديش بتوخذ عشان تطبع صور الفلم؟	قديش بتوخذ عشان تطبيع صور الفيلم؟
هل يدخل هذا في حدود المعفي من الضرائب ؟	هاظ معفي من الضرايب؟	هاد بدخل بحدود المعفي من الضرايب؟
غرفة مفردة بدون دش من فضلك .	غرفة مفردة بدون دش لو سمحت .	غرفة مفردة بدون دش لو سمحت.
هل يمكن أن تدلّني أين أجد القنصلية اليابانية ؟	ممكن تحكيلي وين بقدر ألاقي القنصلية اليابانية؟	بتقدر تقلي وين بلاقي القنصلية اليابانية؟
من فضلك ضعها في قمع .	لو سمحت حطها ببوري.	لو سمحت حطها في قمع.
نصف أوقية من شانيل رقم خمسة من فضلك .	نص أوقية من شانيل رقم خمسة، لو سمحت.	نصف أوقية شانيل رقم خمسة لو سمحت.
شخصان .	شخصين.	واحدين.
هل تعرف ما إذا كان هناك أي فنادق رخيصة الأسعار ؟	بتعرف اذا في أي فنادق رخيصة؟	بتعرف اذا في فنادق رخيصة؟
أريد أن أقدم طلباً للحصول على إصدار جديد .	بدي أقدم طلب مشان اخد إصدار جديد.	بدي أقدم طلب للحصول على إصدار جديد.
أريد بزة .	بدي سترة.	بدي بزة.
هذا مكلف نوعا ما .	هاي بتكلف شوي.	هاد مكلف كثير.
لقد طلبت لحما لا سمكا . هل يمكنك تغيير هذا ؟	طلبت لحم مش سمك. ممكن تغير هاي؟	طلبت لحما ما سمكا. بتقدر تبدل هاد؟
عذراً . هل يوجد محل كتب قريب من هنا ؟	عفواً . في مكتبة بتبيع كتب قريب من هون ؟	أسف. في محل كتب قريب من هون؟
حينئذ سنأخذها .	بهالوقت رح نوخذها.	بعدين رح نوخذها.
إنه بعيد جداً . يحسن بك أن تأخذ سيارة أجرة .	هو بعيد كتير. فضل أكيد تاخذ تكسي.	هو بعيد كثير. أحسنلك تاخد تاكسي.
في أي وقت نبدأ ؟	على أي ساعة راح نبلش؟	بأي وقت بنبلش؟
حسناً . لقد تم التأكيد . هل يمكننا أن نأخذ رقم تليفونك في حالة الحاجة إلى الاتصال بك ؟	ماشي، اتأكدت . بنقدر نوخذ رقمك تلفونك في حال احتجنا نتصل فيك؟	ماشي. اكيد. بنقدر نوخذ رقم تليفونك اذا بدنا نتواصل معك؟
حسنا . خصم خمسة في المائة . هل يوافقك لك ؟	ماشي ، خصم خمسة بالمية. بمشي معك؟	ماشي. خصم خمسة بالمية. بوافقك؟
الآن ، مكالمتك ردت . تفضل من فضلك .	حاليا، مكالمتك رجعت. تفضل لو سمحت.	هسا، مكالمتك ردت. تفضل لو سمحت.
أوه ، أهي كذلك ؟ كيف تفضلها ؟	أووه، هي هيك؟ كيف بتحبها؟	أوه، هي هيك؟ كيف بتحبها؟
أنا فقدت أثر بريد مسجّل .	ضيعت أثر رسالة مسجلة.	ضيعت أثر بريد مسجّل.
لا أشعر بحالة جيدة . هل ترشدني إلى طبيب ؟	ما بحس حالي ملبح. ممكن ادلني على دكتور؟	مش حاسس حالي كويس. بتقدر تدلني على دكتور؟
هل أنت ملم بجغرافيا اليابان ؟	إنت ملم بتظاريس اليابان؟	انت ملم بجغرافيا اليابان؟
لا أستطيع رؤية الشاشة جيداً من هنا ، هل يمكنني تبديل المقاعد لبعض الوقت ؟	أنا مش قادر أشوف الشاشة مليح من هون. ممكن نبدل المقاعد شوي؟	مش شايف الشاشة كويس من هون، بقدر أغير الكراسي شوي؟
سعر الغرفة هو ستة آلاف ين في الليلة .	سعر الغرفة ست آلاف ين لليلة.	سعر الغرفة هو ستة آلاف ين بالليلة.
أعتقد أن سيارتي تستحق حوالي خمسة آلاف دولارا .	أنا بتوقع سيارتي بتسوى حوالي خمس الآف دولار.	بتوقع انه سيارتي بتستحق تقريبا خمسة آلاف دولار.
أين حديقة الحيوان ؟	وين حديقة الحيوانات؟	وين حديقة الحيوانات؟
هي تريد بيرة .	هي بدها بيرا .	هي بدك بيرة.
هل هذه الحقيبة مناسبة لكل حالات الطقس ؟	هاي الشنتة بتناسب كل حالات الجو؟	هاي الشنتة مناسبة لكل الطقس؟
أفضل شيء هو اسطوانة مصغرة .	أحسن اشي هو سي دي صغير.	أحسن شي هو اسطوانة صغيرة.
فهمت ، في هذه الحالة ليس علىّ أن أدفع أجر التبديلات ، أليس كذلك ؟	فهمت، بهاي الحالة ما عليي أدفع فلوس التبديلات، مش هيك؟	فهمت، هاي الحالة مش لازم أدفع أجر التبديلات، صح؟
هل يمكنك أن تريني حجماً أكبر بقليل ؟	ممكن توريني سايز اكبر شوي؟	بتقدر توريني حجم أكبر شوي؟
هل يمكنك بطريقة ما أن تصف لي مرضك بالإنجليزية ؟	بتقدر بأي طريقة تشرحلي مرضك بالإنجليزي؟	بتقدر تحكيلي مرضك بالإنجليزي؟
انتقلنا إلى هذا المنزل منذ عام .	رحلنا لهاظ البيت من سنة.	عنا هاد المنزل قبل شوي.
معذرة ، هل يسعني أن أتوجه إليك بسؤال ؟	معلش، بقدر أوجهلك سؤال؟	معذرة، بقدر اروح معك بسؤال؟
هذا سعر مرتفع ، أليس كذلك ؟	هاظا سعره غالي، صح؟	هاد سعر مرتفع، صح؟
نعم ، ولكن تأكد أن تذكرتك معك .	ايوه، بس تأكد إنه تذكرتك معك.	اه، بس تأكد انه تذكرتك معك.
ما رأيك في موضوع التحرش الجنسي في مكان العمل ؟	شو رأيك بالتحرشات الجنسية اللي بتصير بمكان الشغل؟	شو رأيك بموضوع التحرش الجنسي بالشغل؟
أريد تذكرتين ذهاب وعودة إلى أكسفورد .	بدي تذكرتين روحة رجعة على أكسفورد.	بدي تذكرتين روحة ورجعة على أكسفورد.
هل ستذهب إلى المدرسة هنا ؟	رح تروح عالمدرسة هون؟	راح تروح على المدرسة هون؟
أود بعضاً من فيلم رقم ايه إس ايه لهذه الكاميرا ، من فضلك .	بدي فيلم رقم ايه إس ايه لهاي الكميرا، لو سمحت.	بدي شوي من الفلم رقم ايه إس ايه لهاي الكاميرا، لو سمحت.
أصبت بسحجة .	أني انشخطت.	انصبت حجة.
أريد تسجيل أمتعتي .	بدي أسجل شنطي.	بدي أسجل اغراضي.
أريد أن أرى ذاك الذي في نافذة العرض ، من فضلك .	بدي أشوف هاذ الموجود بالواجهة، لو سمحت.	بدي أشوف هاد اللي بغرفة العرض، لو سمحت.
ما هي المحتويات ؟	شو المكونات؟	شو هي المحتويات؟
لقد تعطلت سيارتي . من فضلك احضر لتأخذها .	سيارتي خربت. تعال خذها لو سمحت.	تعطلت سيارتي. لو سمحت جيبلي تاخذها.
ما النمط الذي في مخيلتك ؟	شو النمط اللي بخيالك؟	شو اللون اللي بحبك؟
كيف تسير الأمور ؟	كيف ماشية الأمور؟	شلون بتروح الأمور؟
ألا تسأله أن يتصل بي ؟	بتقدر تحكيله يتصل فيّ؟	ما بتسأله يرنلي؟
ما الغرض منها ؟	شو الهدف منها؟	شو الهدف منها؟
كيف يربي الآباء اليابانيون أولادهم ؟ هل هم صارمون مع أطفالهم ؟	كيف بيربو الآباء اليابانيين ولادهم؟ همة شديدين مع عيالهم؟	كيف الآباء اليابانيين بيبيوا أولادهم؟ صاروا صغار مع أولادهم؟
هلا ضغطت على زر مصراع النافذة ؟	ممكن تكبس كبسة الشباك؟	ممكن تضغط على زر مصراع الشباك؟
أيمكنني أن أذهب هناك بمترو الأنفاق ؟	بقدر أروح هناك بالمترو؟	بقدر أروح هناك بمترو الأنفاق؟
دعنا نشاهد التلفزيون . فيها مباراة بيسبول .	خلينا نتفرج على التلفزيون. في مباراة بيسبول.	خلينا نشوف التلفزيون. فيها مباراة بيسبول.
حسناً . خذ هذا الاتجاه . من فضلك ، سأوصلك إلى غرفتك .	ماشي، خذ هاي الطريقة. لو سمحت، رح أوصلك لغرفتك.	ماشي. خذ هاد الاتجاه. لو سمحت، راح أوصلك على غرفتك.
أريد تمويج متقارب لشعري ، من فضلك .	بدي أعمل شعري كيرلي ، لو سمحت.	بدي تمويج متقارب لشعري، لو سمحت.
نريد مائدة في الشرفة .	بدنا طاولة على البرندة.	بدنا طاولة بالطاولة.
معدتي ثقيلة .	معدتي كبيرة.	معدتي كبيرة.
أعد ذلك , من فضلك .	عيدها، لو سمحت.	اعمل هيك, لو سمحت.
سآخذ صورة لجاك دانيلز .	راح آخذ صورة لجاك دانيلز.	راح آخذ صورة لجاك دانيلز.
هل لديكم أطباق ذات سعرات حرارية منخفضة ؟ فأنا أتبع نظاما غذائياً حالياً .	عندكو وجبات قليلة الكالوريز ؟ أنا ماشية بدايت هالأيام.	عندكم أكلات سعرات حرارية منخفضة؟ أنا بتبع نظام غذائي جديد.
ما هي الفوارق بين هذه الفنادق ؟	شو الفرق بين هاي الفنادق؟	شو الفوارق بين هاي الفنادق؟
لم أقم بالحجز .	ما عملت حجز.	ما عملت حجز.
هل لديك أية فكة لعداد الانتظار ؟	عندك عملة للبارك ميتر؟	عندك فكة لعداد الانتظار؟
أيهما تفضل , داكن أم فاتح ؟	شو بتحب أكثر, غامق أو فاتح؟	شو بتحب أكثر, داكن ولا فاتح؟
حسناً سيدي . وما الحلو الذي تريد أن تختم به الطعام ؟	طيب يا استاذي.. شو الحلو اللي بدك تختم فيه الأكل ؟	ماشي سيدي. شو الحلو اللي بدك تختم فيه الأكل؟
إنني أسجل لخروجي من الفندق . هلا أرسلت خادماً إلى أعلى ؟	أني بعمل تشيك اوت. ممكن تودي عامل لفوق؟	أني سجل عشان خروج من الفندق. بتقدر تبعثلي خادم عالي؟
كيف يمكنني الذهاب إلى ديزني لاند ؟	شلون بقدر أروح على ديزني لاند؟	كيف بقدر أروح على ديزنيلاند؟
الآن ، هذه اللوحة خاصة جداً . رسمها تسوروتارو كاتاأوكا . إنه معروف بأنه فنان عالمي .	هسا، هاي اللوحة كثير مميزة. رسمها تسوروتارو كاتاأوكا. معروف هاذ فنان عالمي.	هسا، هاي اللوحة خاصة كثير. رسمها تسوروتارو كاتاأوكا. مشهور انه فنان عالمي.
هذه المظلة يمكن استخدامها كعصا للسير .	هاي الشمسية بقدر استخدمها كعصاية.	هاي المظلة بتقدر تستخدمها كعص للسير.
لأن الصيف في اليابان عادة ما يكون شديد الحرارة ، ولم يكن لدينا تكييف هواء قديماً .	لأنه الصيف باليابان عادة بكون حامي كثير، وما كان عندنا مكيف هوا زمان.	لأن الصيف باليابان كثير حامي، ما كان عندنا كرسي هواء قديم.
الشيء نفسه لي ، من فضلك .	ونفس الشي إلي ، لو سمحت.	اشي زي الي، لو سمحت.
يوم الصحة الرياضية هو يوم العاشر من أكتوبر وهو إجازة قومية الغرض منها تحسين صحة المواطنين .	يوم الصحة الرياضية بعشرة عشرة بكون عطلة وطنية عملوه عشان يرفعوا مستوى الصحة عند الناس.	يوم الصحة الرياضية هو يوم عشرة من شهر عشرة وهو إجازة قومية الهدف منها تحسن صحة الناس.
هل من الممكن أن تنظف المنضدة من فضلك ؟	ممكن تنظف الطاولة، لو سمحت؟	ممكن تنظف المنضدة لو سمحت؟
يوجد عصير أناناس وبرتقال وطماطم .	في عصير أناناس و برتقال و بندورة.	في عصير أناناس وبرتقال وبندورة.
أود الإقامة بهذه الغرفة ليلة واحدة أخرى .	بدي أظل بهاي الغرفة ليلة ثانية.	بدي أسكن بهاي الغرفة مرة ثانية.
ثمانية دولارات . وهنا تأتي واحدة حالا .	ثمن دولرات. وهون بتيجي وحدة هسا.	ثمانية دولارات. و هدول تأتي وحدة هسا.
هذا حسن بالنسبة لي . في الواقع أحب أن أدخن .	هاذ تمام بالنسبة إلي . بصراحة أني بحب أدخن.	هاد كويس بالنسبة إلي. بالواقع بحب أشرب.
المكان كان على كرسي في البهو .	المكان كان عكرسي باللوبي.	المكان كان على كرسي بالهو.
أشعر بصداع خفيف .	حاس بصداع خفيف.	حاسة بوجع خفيف.
ألو ، اسمي أودا . عندي حجز الليلة ، لكن سوف أتأخر في القدوم . لهذا من فضلك اتركوا لي الحجز .	مرحبا، اسمي أودا. عندي حجز هالليلة، بس راح يتأخر وصولي. يرجـى خليكو الحجز لي.	ألو، اسمي أودا. عندي حجز الليلة، بس رح أتأخر بالحجز. عشان هيك لو سمحت اتركوا الحجز.
أين قسم السفر ؟	وين قسم السفر؟	وين قسم السفر؟
هل لديك أي صورة لبطاقة هوية ؟	عندك اي صورة للهوية؟	عندك صورة لبطاقة الهوية؟
هل لك أن تعطيني إشارة بالضوء عندما تكون فيها ؟	بتقدر تعطيني إشارة بالضو لما تكون فيها؟	ممكن تعطيني إشارة بالضوء لما تكون فيها؟
أريد فحص هذه الحقائب المتجه إلى طوكيو , من فضلك .	بدي اتفقد هالشناتي اللي رايحة لطوكيو، لو سمحت.	بدي أفحص هاي الشناتي اللي رايحة على طوكيو, لو سمحت.
ثمة شئ خطأ في آلة التهوية هذه .	في اشي غلط بالمروحة هاذ.	في إشي غلط بآلة التهوية هاي.
منذ هذا الصباح .	من الصبح.	من هاظ الصبح.
من فضلك قس حجم حذائي .	لو سمحت قيس حجم كندرتي.	لو سمحت قس حجم شناتي.
أوافق . إنه أحد الأماكن المفضلة لي .	موافق. هاذ واحد من احلا الاماكن عندي.	أوافق. هو واحد من الأماكن اللي بحبها.
لابد أن تكون هادئة .	لازم تكوني هادية.	لازم تكون هادية.
أريد مطفأة سجائر .	بدي منطفة سجاير.	بدي مطفأة سجاير.
أود أن أتتناول طبقا مثل هذا .	بدي أوكل صحن زي هاظ.	بدي آكل طبق زي هاد.
أين توجد أقرب مغسلة ؟	وين اقرب مغسلة؟	وين موجود أقرب مغسلة؟
هل لي بجدول مواعيد ؟	أعطيني جدول المواعيد؟	ممكن جدول مواعيد؟
من فضلك اعطني هذه .	لو سمحت اعطيني هاي.	لو سمحت اعطيني هاي.
هل يمكن أن أذهب لمشاهدة المعالم أثناء رسو السفينة في الميناء ؟	بقدر أروح اشوف المناظر لما السفينة تكون راسية بالمينا؟	ممكن أروح أشوف الأماكن السياحية بالبحر؟
هل يوجد مكان يقبل تنظيف الملابس في أيام الآحاد ؟	في أي مكان بقبل طلبات الغسيل كل يوم أحد؟	في مكان بقبل ينظف الاواعي أيام الاحد؟
هل توجد خدمة نقل بالحافلات إلى متحف فورد ؟	في خدمة باصات بتروح على متحف فورد؟	في خدمة نقل بالباصات على متحف فورد؟
أنا من النرويج .	أني من النرويج.	أنا من النرويج.
عشرة طوابع من فضلك .	عشر طوابع لو سمحت.	عشرة طوابع لو سمحت.
هل يمكنك أن تجر سيارتي ؟	ممكن تجرب سيارتي؟	بتقدر تاخد سيارتي؟
إنه سمك ثعبان مشوي مع مرقة خاصة فوق سلطانية من الأرز .	هاذ سمك الانقليس مع صلصة خاصة محطوطة فوق سلطانية الرز.	هو سمك ثعبان مشوي مع مرقة خاصة فوق سلطانية من الأرز.
هل يمكنني إعادتها في مدينة مختلفة ؟	بقدر أرجعها بمدينة ثانية؟	بقدر أرجعها بمدينة تانية؟
عندي الدواء الخاص بي .	عندي الدوا تاعي.	عندي الدوا تبعي.
هل لديكم أفلام للصيف ؟	عندكو أفلام للصيف؟	عندكم أفلام للصيف؟
هل تريد أن تذهب للتسوق معي بعد الظهر ؟	بتحب تيجي معي نتسوق بعد الظهر؟	بدك تروح تسوق معي بعد الظهر؟
نعم ، سيدي . كيف تريدني أن اقطعها ؟	أيوة ، يا سيدي . كيف بدك إني أقصها؟	اه، سيدي. كيف بدك اقطعها؟
عندما أعود ثانية إلى اليابان ، سأكتب خطاباً . وإذا كان لديك وقت ، من فضلك أرسل لي خطاباً .	لما أرجع مرة ثانية لليابان، رح أكتب رسالة. وإذا كان عندك وقت، تكرم ابعثلي انا رسالة.	لما أرجع مرة ثانية على اليابان، رح أكتب خطاب. وإذا عندك وقت، لو سمحت ابعثلي خطاب.
فراولة ، من فضلك .	فراولة، لو سمحت.	فراولة، لو سمحت.
هل تفضل ماسكات للشعر أصغر أم أكبر ؟	بتحبي القناع للشعر أصغر ولا أكبر؟	بتحب ماسكات للشعر اصغر ولا أكبر؟
بالتأكيد . متى تود أن تلعب جولف ؟	طبعاً. أميت بدك تلعب جولف؟	أكيد. متى بدك تلعب جولف؟
من فضلك اجعل الجزء العلوي أطول قليلاً .	من فضلك خلي الجزء الفوقاني أطول شوي.	لو سمحت اجعل الجزء العلوي أطول شوي.
كم أوقية من العطر أستطيع الحصول عليه من غير رسوم ؟	كم وقية من العطر بقدر أوخذها بدون رسوم ؟	كم أوقية من العطر بقدر أجيب بدون رسوم؟
معذرة , قم بالضغط على مصراعي النافذة الخشبيين , من فضلك .	عفواً، نزل اباجور الشباك الخشب , لو سمحت.	معذرة، اكبس على مصراعي الشباك الخشبيين، لو سمحت.
لدي ثلاث حقائب .	عندي ثلث شناتي.	عندي ثلاث شنات.
هذا البيت يبدو مريحا للمعيشة فيه , أليس كذلك ؟	هاد البيت مبين كثير مريح العيشة فيه، مش هيك؟	هاد البيت زاكي للمعيشة فيه, صح؟
أريد أن أغسل ملابسي في وقت لاحق اليوم .	بدي أغسل وعيتي بوقت ثاني اليوم.	بدي أغسل أواعي بوقت ثاني اليوم.
أرجو ذلك .	بتمنى هيك.	لو سمحت.
واحد لنيويورك ، من فضلك .	واحد لنيويورك، إذا سمحت.	واحد لنيويورك، لو سمحت.
لا ، إنها لا تشمل الضريبة ومصاريف الخدمة .	لا، هي ما بتشمل الضريبة ومصاريف الخدمة.	لا، ما بتشمل الضريبة ومصاريف الخدمة.
قم بها بطريقتك .	اعملها بطريقتك.	اعملها بطريقتك.
كم تستغرق مشياً على الأقدام ؟	قديش بتوخذ وقت مشي عالجرين؟	قديش بتوخذ مشي؟
هل يمكنني الحصول على برنامج ؟	بقدر آخذ برنامج؟	بقدر اخد برنامج؟
من فضلك سجل عنوان الاتصال بك هنا .	من فضلك اكتب عنوانك للتواصل معك هون.	لو سمحت سجل عنوانك هون.
نعم ، يا سيد تاناكا هناك رسالتان لك .	أيوة، يا سيد تاناكا، في عندك رسالتين.	اه، يا تاناكا، في رسالتين الك.
هل لي في شيء من لحم الخنزير والبيض ؟	ممكن شوية من لحم الخنزير والبيض؟	ممكن إشي من لحم الخنزير والبيض؟
إذا حدث ذلك ، من فضلك أتصل بي .	اذا صار هيك ، لو سمحت رنلي .	إذا صار هيك، لو سمحت رنلي.
أوه ، آسف لأني أزعجتك .	اووه، معذرة الك ازعجتك.	أه، آسف لأني أزعجتك.
هل يمكن أن أقيس مقاس تسعة .	ممكن أقيس مقاس تسعة ؟	ممكن أقيس مقاس تسعة؟
ملابسه دائماً موضة قديمة .	هدومه دايما موضة قديمة.	ملابسه دائما موضة قديمة.
هلا حجزت لي تاكسي الساعة السادسة صباح غد , من فضلك ؟	ممكن تحجزلي تكسي الساعة ستة الصبح لبكرا ، لو سمحت؟	ممكن تحجزلي تاكسي الساعة ستة الصبح بكرة, لو سمحت؟
إنه صحيح هنا .	هو صحيح هون.	صح هون.
هل يمكن أن تدخل معه فكة صغيرة ؟	بتقدر ادخل معه شوية فراطة؟	ممكن تدخل معه فكة صغيرة؟
أنا حقا آسف .	أني جد آسف.	أنا آسف كثير.
لقد طلبت ذلك .	طلبت هاظ.	طلبت هيك.
ما تكلفة هذا في اليوم ؟	قديش تكلفته ليوم واحد؟	قديش بكلف هاد باليوم؟
لا توجد أية مشاكل .	ما في أي مشاكل.	ما في مشاكل.
أجل . سنصل في الثامنة حسب التوقيت المحلي .	أها. رح نوصل الساعة ثمنية بالتوقيت المحلي.	أكيد رح نوصل الساعة ثمانية حسب التوقيت المحلي.
هل لديك واحد أكبر ؟	عندك واحد أكبر؟	عندك واحد أكبر؟
أنا كينجي .	أني كينجي.	أنا كينجي.
إنه المبنى الثاني على يسار هذا المبني الأبيض .	البناية الثانية على يسار البناية البيضا.	هاد المبنى الثاني على يسار هاد المبني الأبيض.
أعطني قطعة لحم الخنزير هذه ، ولكن ليس بسمك تلك .	أعطييني قطعة لحمة الخنزير هاي، بس ما تكون سميكة مثل هذيك.	اعطيني قطعة لحم الخنزير هاي، بس مش بسمك هاي.
لدي موعد آخر .	عندي موعد ثاني.	عندي موعد ثاني.
لدي غرفة جاهزة لك في جراند هويتل . هل تستطيع الذهاب إلى هناك ؟	عندي غرفة جاهزة إلك بالجراند هوتيل. بتقدر تروح لهناك؟	عندي غرفة جاهزة لك في جراند هويتل. بتقدر تروح هناك؟
أرني واحدة لإحدى الشابات .	وريني وحدة لوحدة من الصبايا.	فرجيني وحده لحدا الشباب.
أود أن أحجز غرفة لهذه الليلة .	بدي أحجز غرفة لهاي الليلة.	بدي أحجز غرفة لليل.
لقد خلعت البنطلون .	شلحت البنطلون.	خلعت البنطلون.
إنها رائعة .	هاي روعة.	هي حلوة.
أهذه هي الحافلة التي توصل إلى وسط المدينة ؟	هاظ هو الباص اللي بوصل لوسط البلد؟	هاد هو الباص يلي بوصل وسط البلد؟
أتظن ذلك ؟	بتظن هيك؟	بتتوقع هيك؟
أود أن أرسله عن طريق البريد .	حاب أبعثه عن طريق البريد.	بدي ابعثه عن طريق البريد.
أشكرك ثانية لأنك ذكرتني . هل يميل كثير من الناس أن ينسوا توقيع أسمائهم ؟	بشكرك مرة ثانية عشان ذكرتني. بروح كثير من الناس تنسى توقع ع أسمائهم ولا شو؟	أشكرك مرة تانية لأنك حكيت. بحب الناس ينسوا توقيع أسمائهم؟
هلا أرسلت تاكسي إلى المدخل الرئيسي لـ ويستمانستر مول ؟	ممكن تودي تكسي للمدخل الرئيسي بويستمانستر مول؟	ممكن تبعثلي تاكسي للمدخل الرئيسي لـ ويستمانستر مول؟
هل لديكم أية جولة سياحية أخرى ؟	عندك أي رحلة ثانية؟	عندكم أي جولة سياحية ثانية؟
السيارة تصدر صاخبا غريبا .	السيارة بطلع صوت غريب وعالي.	السيارة بتصدر صوت غريب.
هذه سبعون دولار .	هاي سبعين دولار.	هاي سبعين دولار.
أنا شديد الحساسية للقطط .	أني بتحسس كثير من البسس.	أنا حساسة للقطط.
لا . قليلاً في الأمام . هناك ، نعم .	لا. شوي لقدام. هناك، إيوه.	لا. شوي قدام. هناك، اه.
ركن المدخنين ، من فضلك . وشباك بجوار النافذة ، من فضلك .	ركن الشيشانيين، إذا سمحت. وشباك جمب النافذة، إذا سمحت.	ركن المدخنين، لو سمحت. وشباك جنب الشباك، لو سمحت.
هل يكلفني دخول هذا المبنى أي أموال ؟	بدفع أي مصاري إذا فتت على هاي العمارة؟	بتكلفني دخول هاد المبنى أي أموال؟
سأكون هنا حتى التاسعة . يحدوني الأمل أن تتمكن من القبض على المجرم في أقرب وقت ممكن .	راح أظل هون للساعة تسعة. بتمنى إنكم تمسكوا المجرم بأسرع وقت.	راح أكون هون لحد الساعة تسعة. بتمنى تلاقي المجرم بأقرب وقت ممكن.
شكراً لك . من فضلك عاود مرة أخرى .	مشكور. يلا جرب مرة ثانية من فضلك.	شكرا الك. لو سمحت عاود مرة ثانية.
فاتتني محطتي .	راح علي الموقف.	فاتتني محطتي.
أين يمكنني أن أقيم أثناء الجولة ؟	وين ممكن أسكن خلال الرحلة؟	وين بقدر أسكن أثناء الجولة؟
إنه لمن دواعي السرور أن أتحدث معك .	إنسريت بالحكي معك.	كثير مبسوط أحكي معك.
أي مقاس تريد ؟	شو السايز اللي بدك ياه؟	أي مقاس بدك؟
بالتأكيد ، هل تريد تسريحة متموجة دائما ؟	أكيد، بدك اياه كيرلي دايما؟	أكيد، بدك تسريحة مرتبة دائما؟
إلى اليسار ، من فضلك .	على اليسار، لو سمحت.	على اليسار، لو سمحت.
لقد أتلفت حقيبتي .	دمرت شنتتي.	انسرق شنتتي.
البيتزا لذيذة . من صنعها ؟	هاي البيتزا زاكية. مين عملها؟	البيتزا زاكي. من صنعها؟
أخشى أن أسأل ، لكن ماذا تعني ؟	بخاف اسأل، بس شو قصدك؟	خايف أسأل، بس شو قصدك؟
لا ، من فضلك اجلس وانتظر . سأعود بعد قليل .	لا، لو سمحت اقعد واستنى. راح أرجعلك بعد شوي.	لا، لو سمحت اقعد وانتظر. رح أرجع بعد شوي.
الكعب مرتفع جداً .	الكعب عالي كثير.	الكعب كبير كثير.
كم سيستغرق إصدار التأشيرة لي ؟	قديش الفيزا بدها وقت عشان تطلع؟	قديش بدها التأشيرة إلي؟
لقد تعطلت سيارتي .	خربت سيارتي .	تعطلت سيارتي.
كيف أثر الركود على الشركة ؟	شلون أثر الركود عالشركة ؟	كيف أثر الركود على الشركة؟
توجد رحلات جوية على شركات جال وانا التي تقلع في الساعة العاشرة وخمسة وخمسين دقيقة . ولكن , للأسف كلتا الرحلتين محجوزتان .	في طيارات على شركات جال وانا اللي بتغادر الساعة عشرة وخمسة وخمسين دقيقة. بس، للأسف الطيارتين مفللات.	في رحلات جوية على شركات جال وانا يلي بتروح الساعة عشرة و خمسه و خمسين دقيقة. بس, للأسف كلتا الرحلتين محجوزين.
هل هذا سيفسد ؟	هاذ رح يخرب؟	هاد رح يفسد؟
هل يمكنك أن تخبرني بقيمة هذه المكالمة ؟	بتقدر تحكيلي تكلفة هاي المكالمة؟	بتقدر تقلي قديش سعر هاي المكالمة؟
من الأفضل أن تضبط المرآة العاكسة للرؤية الخلفية .	أحسن شي تزبط المراية الخلفية.	الأحسن تحط المرآة العاكسة عشان تشوف الورا.
كم أجرة التاكسي حتى هذا الفندق ؟	كم أجرة التكسي لعند الفندق؟	قديش أجرة التكسي حتى هاد الفندق؟
أريد مزيلا لطلاء الأظافر .	بدي أسيتون للمناكير.	بدي مزيلا لطلاء الأظافر.
ما هي مكونات هذا الطبق ؟	شو مكونات هالصحن؟	شو مكونات هاد الأكل؟
متى ينبغي أن آتي ؟	متى لازم آجي ؟	متى لازم آتي؟
هل يمكن أن تخبرني عن الأماكن الشيقة هنا ؟	ممكن تحكيلي عن الأماكن الحلوة هون؟	بتقدر تحكيلي عن الأماكن الحلوة هون؟
حسنا ، اضغط تسعة وصفر واحد واحد ، ثم الكود الخاص بالبلد ورقم الهاتف .	طيب، إكبس تسعة وصفر واحد واحد، وبعدين الكود تبع البلد ورقم التلفون.	ماشي، اكبس تسعة وصفر واحد واحد، بعدين الكود الخاص بالبلد ورقم التلفون.
أعتقد أنك ارتكبت خطأً . الغرفة دفع ثمنها مسبقاً . معي إيصال .	بظن إنك غلطت. الغرفة حاسبت عنها قبل. معي وصل.	بتوقع إنك ارتكبت غلط. الغرفة دفعت حقها قبل ما تحجز. معي وصل.
هل يمكنك أن تتحرك بهذا الاتجاه ؟	بتقدر تمشي بهالجهة؟	بتقدر تتحرك بهاد الاتجاه؟
سيغادر قطارك من الرصيف رقم ثمانية .	رح يطلع قطارك من السكة رقم ثمانية.	رح يطلع قطارك من الرصيف رقم ثمانية.
أريد غرفة أخرى .	بدي غرفة ثانية.	بدي غرفة ثانية.
لماذا يحدث هذا ؟	ليش بصير هاذ ؟	ليش هيك بصير؟
ما الرقم الذي أطلب منه هنا ؟	شو الرقم اللي بطلب منه هون؟	شو الرقم اللي بدي أطلب منه هون؟
هل يوجد مطعم أرخص قريب من هنا ؟	في مطعم رخيص قريب من هون؟	في مطعم أرخص قريب من هون؟
هل يوجد مطعماً يمكنك أن تزكيه بالقرب من هنا ؟	في مطعم بتنصح فيه قريب من هون؟	في مطعم بتقدر تنصح فيه قريب من هون؟
أوبرا ميتروبوليتان .	أوبرا المتروبوليتان.	أوبرا ميتروبوليتان.
أين المصعد ؟	وين الأصنصير؟	وين المصعد؟
هل يمكنك أن ترني أشياء أخري ذات تصميمات مختلفة .	ممكن توريني شغلات ثانية بأشكال غير؟	بتقدر تريني اشياء ثانيه زي هيك؟
ليس بمقدورك تغيير وظيفتك بسهولة .	ما بتقدر تغير شغلك ببساطة.	ما بتقدر تحول وظيفتك بسهولة.
ماذا تسمون هذا بالإنجليزية ؟	شو بتسموه هاذ بالإنجليزي؟	شو بتسموا هاد بالإنجليزي؟
سأصل في التاسع من مارس وأغادر في الرابع عشر .	راح أوصل بتسعة ثلاث وراح أروّح بأربعطعش.	رح أوصل يوم تسعة من شهر تسعة ورح أروح يوم اربعش.
هل ستحدد موعداً للخروج معي ؟	بدك تحدد موعد لتطلع معي؟	رح تحدد موعد حتى تروح معي؟
لم اسمع بهذا العنوان من قبل بالقرب من هنا .	ما سمعت بهاذ المكان قبل هيك بالمنطقة هون .	ما سمعت هاد العنوان من قبل قريب من هون.
سوف أحضر لك العرض الأسبوع القادم .	بدي اجهزلك العرض الاسبوع الجاي.	رح أجيبلك العرض الاسبوع الجاي.
صديقي مريض جداً . هل تستطيع أن تطلب دكتور ، من فضلك ؟	صاحبي كثير مريض. ممكن تطلب الدكتور، لو سمحت؟	صاحبي مريض كثير. بتقدر تطلب دكتور، لو سمحت؟
هل أخذت تذكرة الحافلة ؟	اخذت تذكرة الباص؟	أخذت تذكرة الباص؟
يوجد لدى حوالي ألفي وخمسمائة دولار بالين الياباني .	أنا معي حوالي ألفين وخمسميت دولر بالين الياباني.	عندي تقريبا ألفي وخمسمية دولار بالين الياباني.
هل يمكنني استئجار مرشداً يتحدث اللغة اليابانية ؟	ممكن أستأجر دليل بسولف ياباني؟	بقدر أستأجر دكتور بحكي ياباني؟
هذا بعينه ما كنت أبحث عنه .	هاي بالزبط اللي كنت بدور عليه.	هاد هو اللي كنت أدور عليه.
رقم مقعدي دي اثنا عشر . أين هو ؟	رقم كرسيي دي اثنعش. وين هو؟	رقم مقعدي دي اثنعش. وين هو؟
فينس وليندا يريدان أن يبقيا بمفرديهما ، لذا أخشى أنني لا بد أن أبقى هنا هذه الليلة .	فينس وليندا بدهم يظلوا لحالهم، فبخاف انو لازم اظل هون الليلة.	فينس وليندا بدنا يخليني وحده، عشان هيك خايف انه لازم أظل هون الليلة.
إنها تبعد حوالي تسعة وتسعون ميلا .	هي بتبعد حوالي تسعة وتسعين ميل.	هي بعيدة تقريبا تسعة وتسعين ميل.
حسناً ، تم إعادة التأكيد على حجزك .	ماشي، اتأكدنا من حجزك مرة ثانية.	ماشي، رجعت التأكيد على حجزك.
حسناً ، فلنق نظرة عليك .	طيب ، خلينا نطل عليك .	ماشي، خليني أشوفك.
هل يجب على أن أجيب بـ نعم أو بـ لا ؟	لازم اجاوب بـ اه أو بـ لأ ؟	لازم أجيب نعم او لا؟
من فضلك ، بدلي شيك المسافرين إلي نقود .	لو سمحت اصرفلي هاد الشك السياحي كاش.	لو سمحت، بدلي شيك المسافرين إلي نقود.
من فضلك دلني على أرخص وسيلة للذهاب إلى سان فرانسيسكو .	من فضلك دلني على أرخص طريقة حتى أروح على سان فرانسيسكو.	لو سمحت دلني على أرخص طريقة حتى أروح على سان فرانسيسكو.
أريد غرفة مفردة بحمام لقاء ثمانين دولارا ، من فضلك .	بدي غرفة فردية مع حمام بـثمانين دولار, لو سمحت.	بدي غرفة مفردة بحمام مقابل ثمانين دولار، لو سمحت.
من فضلك ، هل رسمت لي خريطة بسيطة من هنا ؟	من فضلك، بتقدر ترسملي خريطة سهلة من هون؟	لو سمحت، رسمت لي خريطة بسيطة من هون؟
ليس لدي أية مضارب أو أحذية .	ما عندي لا مظارب ولا أحذية.	ما عندي مضارب أو أحذية.
أوه ، يبدو أنني افقد شيء ما كل وقت أسافر فيه .	أوه، شكلني بضيع اشي كل مرة بسافر فيها.	أوه، شكله اني افقد اشي كل وقت أسافر.
أجل ، إنها مفتوحة من التاسعة حتى التاسعة .	أها ، هي فاتحة من الساعة تسعة للساعة تسعة.	أه ، هي مفتوحة من تسعة تسعة.
سيأتي القطار السريع التالي بعد ساعة .	راح يجي القطار السريع الجاي بعد ساعة.	راح يجي القطار السريع الثاني بعد ساعة.
مرحبا . كيف حالك ؟	مرحبا . كيف حالك؟	مرحبا. شلونك؟
تاريخ الانتهاء تسعة عشر من مارس تسعة وتسعين .	تاريخ انتهاء الصلاحية تسعطعش من شهر ثلاث التسعة وتسعين.	تاريخ الانتهاء تسعة عشر من شهر ثلاث تسعة.
هلا احتفظت بهذا لي ؟	ممكن تظبلي هاد؟	ممكن تخليلي هاد؟
هل تقبل بالين الياباني ؟	بتوخذ بالين ياباني؟	بتقبل بالين الياباني؟
من فضلك ، اكتب رقم الغرفة في الخلف .	من فضلك ، اكتب رقم الغرفة بقفى الورقة.	لو سمحت، اكتب رقم الغرفة بالورا.
هل يمكنك أن تصلح ذلك ؟	بتقدر تصلح هاي؟	بتقدر تصلح هيك؟
سيداتي سادتي ، لدينا على متن رحلتنا اليوم مضيفين يتحدثون اليابانية يمكن التعرف عليهم من خلال الشارة التي يلبسونه . إذا كنت تعرف أي شخص يريد مساعدة في الترجمة ، من فضلك دعنا نعرف .	سيداتي وسادتي،برحلتنا اليوم، عنا مضيفين بحكوا ياباني بتعرفوهم من الباجة اللي لابسينها. إذا بتعرف إنه أي حد بحتاج مساعدة بالترجمة، لو سمحت خلينا نعرف.	سيداتي سادتي، عنا على متن رحلتنا اليوم مضيفين بحكو يابانيين، بنتعرف عليهم من خلال الشارة اللي ببسوها. اذا بتعرف حدا بحكو يا ريت يساعدنا بالترجمة، لو سمحت إحنا بنتعرف.
هل يجب أن أدفع الرسم الإضافي عندما أدخل مبنى ؟	لازم أدفع رسوم ثانية بس أفوت عأي مبنى؟	لازم أدفع الرسم الإضافي لما أدخل مبنى؟
لقد انكسرت السنة .	انكسرت السنة.	انكسرت السنة.
تبدو البونساي كهواية شخص هرم .	شكلها البونساي هواية الختيار.	بتبين البونساي كهواية كل واحد.
لدينا غرفة مزدوجة بحمام بخمسة و ثمانين دولار .	عنا غرفة مزوجة مع حمام بخمسة وثمنين دولار.	عنا غرفة مزدوجة مع حمام بخمسة و ثمانين دولار.
هل هذه من نوع ليفي خمسة صفر المعتمدة ؟	هاي من نوع ليفي خمسة صفر الأصلية؟	هاي من نوع ليفي خمسة صفر المعتمد؟
هل يمكن أن أبيت عندكم الليلة ؟	بقدر أبات عندكو الليلة؟	ممكن أبيت عندكو الليلة؟
هل تود منضدة في المطعم الرئيسي أو في غرفة خاصة يا سيدي ؟	سيدي، بتحب طاولة بالمطعم الرئيسي ولا بغرفة خاصة؟	بدك طاولة بالمطعم الرئيسي أو في غرفة خاصة يا سيدي؟
مائة بالمائة قطن .	مية بالمية قطن .	مية بالمية قطن.
إنها لذيذة جداً .	كثير طيبة.	هي لذيذة كثير.
هل أستطيع التحدث مع المدير ؟	بقدر أحكي مع المدير؟	بقدر أحكي مع المدير؟
أنا آسف ، هو ليس بالداخل الآن .	أني آسف، هو مش جوا هسا.	آسف، هو مش جوا هسا.
أريد غرفة بسريرين . ما ثمن الغرفة في الليلة ؟	بدي غرفة بتختين. قديش تكلفة الغرفة بالليل؟	بدي غرفة بتختين. قديش حق الغرفة بالليل؟
ابقى على الخط وانتظر لحظة من فضلك .	خليك على الخط و استنى شوي من فضلك.	روح على الخط و استنى شوي لو سمحت.
هل يمكنني أن أرسل أي ميل واحد فقط قيمته دولار .	بقدر أبعث أي ميل واحد تكلفته بس دولر؟	بقدر أرسل ميل واحد بس قيمته دولار؟
من أين تغادر الحافلات لمشاهدة المعالم ؟	من وين بتطلع الباصات حتى نشوف المناظر؟	من وين بروح الباصات عشان تشوف الأماكن السياحية؟
هل لديك ألوان أخرى من هذا ؟	عندك ألوان ثانية من هاذ؟	عندك ألوان ثانية من هاد؟
اذهب إلى نادي رياضي كل يومين .	روح عالجيم كل يومين.	روح على نادي رياضي كل يومين.
تم الفصل بين مقاعدنا .	صار فصل بين كراسينا.	صار الفصل بين كراسينا.
هل لك أن تخبرني عن مكان تحليق الطائرة الآن ؟	بتقدر تحكيلي وين بطير الطيارة هسا؟	ممكن تحكيلي عن مكان تحليق الطيارة هسا؟
كيف ترغب في إجراء المكالمة ؟	شلون بدك تعمل المكالمة؟	شلون بدك تتصل؟
أفهم ذلك . أحاول استئجار سيارة سيتروين .	بفهم هالاشي. بحاول أستأجر سيارة سيتروين.	بفهم هيك. بحاول أستأجر سيارة سيتروين.
هذه هي الغرفة اثنا عشر صفر سبعة .	هاي هي الغرفة اثنعش صفر سبعة.	هاي الغرفة اثنعش صفر سبعة.
هل لك أن تأخذ هذا ، من فضلك ؟	ممكن توخذ هاذ، لو سمحت؟	ممكن توخذ هاد، لو سمحت؟
كم عمر هذا الصبي ؟	قديش عمر هالولد؟	قديش عمر هاد الصبي؟
قارب مع مرشد ، من فضلك .	قارب مع مرشد ، لو سمحت.	قارب مع مرشد، لو سمحت.
القهوة غير محسوبة .	القهوة مش محسوبة؟	القهوة مش محسوبة.
لقد أضعت تذكرة الطيران الخاصة بي .	انا ضايع تذكرة الطيران حقتي.	حطيت تذكرة الطيران تبعي.
نعم , في بادئ الأمر ، اغسليها على منفصلة .	أيوة, بالأول, غسليها لحالها.	اه, بالمناسبة، اغسلها على منفصلة.
هل يمكنني أن التقط بعض الصور ؟	ممكن اوخذ شوية صور؟	بقدر اصور شوي؟
هلا فتحت هذه الحقيبة ، من فضلك ؟ ماذا يوجد هنا .	بتقدر تفتح هاي الشنطة، لو سمحت؟ شو لقيت فيها هون؟	ممكن تفتح هاي الشنتة، لو سمحت؟ شو موجود هون؟
ما نوع هذه الموسيقى ؟	شو نوع هاي الموسيقى؟	شو نوع هاي الموسيقى؟
أريد بعض الكريم للأيدي .	بدي شوية كريم للإيد.	بدي شوية الكريم للأيد.
مائة غير المدخنين من فضلك .	مية غير اللي بدخنوا، لو سمحت.	مية مش المدخنين لو سمحت.
من فضلك أعطني بعض الفكة .	لو سمحت اعطيني شوية فراطة.	لو سمحت أعطيني شوية فواكه.
بالتأكيد . لدينا بعض الماركات الأمريكية الأصلية الجميلة . للكتب .	أكيد. عنا شوية ماركات أمريكية أصلية حلوة. للكتب.	أكيد. عنا بعض الماركات الأمريكية الحلوة. للكتب.
لدي وصولها ، سوف ندفع ثمن شحنها إلى عنوان منزلك .	لما توصل. راح ندفع حق الشحن لعنوان بيتك.	عندي وصلتها، رح ندفع حق شحنها على عنوانك.
إنها مشغولة .	هيه مشغولة.	هي مشغولة.
سرقت حقيبتي في الشارع .	انسرقت شنتي بالشارع.	انسرق شنتتي بالشارع.
لم تصنع هذه باليابان ، أليس كذلك ؟	ما صنعت هاي باليابان، صح؟	ما عملت هاي باليابان، صح؟
سيبدأ الصعود على متن الطائرة الساعة الرابعة والنصف لذلك من فضلكم كونوا هناك قبل هذا الموعد .	رح يبلش الصعود على الطيارة الساعة أربعة ونص . لذالك لو سمحتو كونو هون قبل هذا الوقت.	رح يطلع الصعود على الطيارة الساعة أربعة ونص لذلك لو سمحتوا كونوا هناك قبل هاد الموعد.
نحن هنا لمدة يوم .	إحنا هون لمدة يوم.	احنا هون ليوم.
لقد فقدت شيكاتي السياحية .	ضيعت الشيكات السياحية تبعتي.	ضيعت شيكاتي السياحية.
ما أنواع الخضراوات الموجودة لديك ؟	شو هي الخضرة اللي عندك؟	شو أنواع الخضراوات اللي عندك؟
يجب أن أنتقل إلى عربة مكيفة واحد صفر صفر . هل هذا ممكن ؟	بدي انتقل لعرباية مكيفة واحد صفر صفر. ممكن؟	لازم أروح على عرباية مكيفة واحد صفر صفر. ممكن؟
نعم ، حجز لمدة ستة أيام من فضلك ، بدء من الثالث والعشرين من يوليو .	ايوه، حجز لست أيام لو سمحت، ببلش من ثلاث وعشرين ستة.	اه،حجز لمدة ستة أيام لو سمحت،بلش من ثلاث وعشرين سبعة.
من أي مكان يمكنني أن أغير القطار الذي يوصلني إلى إدنبره ؟	منين بقدر أغير القطار اللي بوصلني لادنبرة؟	من أي مكان بقدر أغير القطار يلي بوصلني على إدنبره؟
أكثر منتجاتنا بيعت عبر السنوات الأربع الماضية هي الآلة الناسخة طراز أ . أكس أربعة خمسة صفر .	أغلب اللي بعناه من منتجاتنا على مرّ الأربع سنين اللي فاتت هي الآلة الناسخة، طراز أ . أكس أربعة خمسة صفر.	أكثر منتجاتنا بيعت خلال الخمس سنين الماضية هي الآلة الناسخة طراز أ. أكس أربعة خمسة صفر.
آسف سأعود لاحقاً .	آسف. راح أرجع بعدين.	آسف راح أرجع بعدين.
هل يتحتم عليك كثيراً أن تعمل حتى ساعة متأخرة ؟	بتظطر كثير تشتغل لوقت متأخر؟	بتقدر تعمل كثير حتى تتأخر؟
هل لديك نفس هذا التصميم بكعب أعلى ؟	عندك نفس هاذ الديزاين بس كعب أعلى؟	عندك نفس هاد التصميم بكعب فوق؟
التكلفة ، من فضلك . هل تقبلون بطاقة فيزا ؟	الحساب ، لو سمحت. يتقبلو بطاقة فيزا؟	السعر، لو سمحت. بتقبلو فيزا؟
من فضلك استلق هنا .	لو سمحت، اتمدد هون.	لو سمحت استلق هون.
اسمي ميتشكو تاناكا ، ورقم الرحلة إلى طوكيو هو خمسة ، صفر ، واحد .	اسمي ميتشكو تاناكا، ورقم الرحلة لطوكيو هو خمسة، صفر، واحد.	اسمي ميتشكو تاناكا، ورقم الرحلة ل طوكيو خمسة، صفر، واحد.
آه ، كلا . من فضلك أسرع . إننا متأخرون .	آه، لأ. لو سمحت عجل، إحنا متأخرين.	آه ، لا. لو سمحت اسرع. نحن متأخرين.
ما هي أفضل جولة حتى أرى أشهر الأماكن ؟	شو هي أحسن رحلة عشان أشوف أشهر الأماكن؟	شو هي أحسن جولة حتى أشوف أشهر الأماكن؟
حسنا . مقعدان من فضلك .	ماشي. كرسيين لو سمحت.	ماشي. مقعدين لو سمحت.
أظن أنه بديع المنظر .	بظن انه منظره صاير حلو.	بتوقع انه حلو المنظر.
بنطلون أخر ؟	بنطلون ثاني؟	بنطلون تاني؟
سأجرب بعضاً من الشراب المثلج .	بدي أجرب شوي من العصير المثلج.	رح أجرب شوي من الشراب المثلج.
هل هذا هو الطريق الصحيح إلى المحطة المركزية ؟	هاد الطريق الصح للمحطة الرئيسية؟	هاد هو الطريق الصحيح للمحطة المركزية؟
أريد شراء تذكارات لأصدقائي . أيمكن أن تُوصي ببعض منها ؟	بدي أشتري هدايا تذكارية لأصحابي. ممكن تنصحني بإشي؟	بدي اشتري تذكارات لأصحابي. بتقدر تنصحني ببعض منها؟
أريد الحصول على تأمين .	بدي تأمين.	بدي أجيب تأمين.
آوه إلقاء نظرة على صندوقك .	واو أنا حاب أشوف صندوقك.	يلا تشوف صندوقك.
إنها أربعة عشرة .	هاي أربعطعش.	أربعطعش.
سأنتظر حتى يتاح الجلوس في التراس .	رح أستنا لحتى يصير الجلوس بالتراس ممكن.	رح استنى حتى يصير اقعد على التراس.
يمكنك أن تمكث في منزلي .	ممكن تفضل تقعد ببيتي.	بتقدر تقعد بمنزلي.
هذا , من فضلك .	هاظ ، لو سمحت.	هاد, لو سمحت.
من فضلك نظف هذا المعطف .	لو سمحت نظف هاظا الكبوت.	لو سمحت نظف هاد المعطف.
شراب الشمام كحلاء ، من فضلك .	عصير الشمام كحلو ، لو سمحت.	شراب الشمام كحلاء، لو سمحت.
أخطط لتعلم الجولف .	بفكر أتعلم جولف.	بخطط أتعلم جولف.
كان هذا مكسوراً بالفعل عندما فتحت الطرد .	كان هاذ مكسور فعلاً لما فتحت الطرد.	كان هاد مكسور جد لما فتحت الطرد.
توقفت ساعتي .	ساعتي وقفت.	وقفت ساعتي.
أجل . إنها مشكلة تخلص من الفضلات .	أيوة. هاي مشكلة كب الزبالة.	أكيد. هي مشكلة تخلص من الفضلات.
هناك محل لبيع الزهور في الطريق .	في محل ورد بالطريق .	هناك محل ببيع الزهور بالطريق.
هل السيدات يقبلن هذا ؟	الستات بقبلن بهاذ؟	النسوان بقبلن هاد؟
هل يمكننا ترك أشياءنا ما عدا الأشياء القيمة في الحافلة ؟	بنقدر نخلي اغراضنا هون، ماعيدا الأشياء الغالية، في الباص؟	بنقدر نخلي أغراضنا ما عدا الأشياء الغالية بالباص؟
بمقدورك أن ترى واحداً عند " كارينجي هول " .	بامكانك تشوف واحد بقاعة كارنيجي.	بتقدر تشوف واحد عند "كارينجي هول".
آسف جدا ، لكني أود تأجيل الميعاد .	آسف كثير، بس بدي أجل الموعد .	آسف كثير، بس بدي أأكد الموعد.
أجل , يمكننا القيام بخدمتك بداية من السابعة .	اها، منقدر نخدمك من الساعة السابعة.	أه, بنقدر نعمل خدماتك بداية من الساعة سبعة.
على أي جانب من ميدان الاتحاد هي ؟	على اي جهة من دوار الاتحاد بتكون؟	على أي جهة من ميدان الاتحاد هي؟
أريد بعضاً من كريم التنظيف .	بدي شوية كريم تنظيف.	بدي شوية كريم التنظيف.
من فضلك لفها كل على حدة .	من فضلك غلفها كل وحدة لحالها .	لو سمحت لفها كل وحدة على حدا.
كود المنطقة هو ثلاثة . ورقم الهاتف هو اثنان ثلاثة أربعة ثلاثة أربعة صفر صفر .	رقم المنطقة ثلاثة. ورقم التلفون اثنين ثلاثة أربعة ثلاثة اربعة صفر صفر.	كود المنطقة هو ثلاثة. ورقم التلفون هو اثنين ثلاثة أربعة ثلاثة أربعة صفر صفر.
كم عدد المرات التي سأغير فيها القطارات للوصول إلى هناك ؟	كم قطار رح اركب عشان أوصل هناك؟	قديش رح أغير القطارات عشان أروح هناك؟
هل تريد تسوية الفاتورة الآن ؟	راح تحاسب عالفاتورة هسا؟	بدك تسوية الفاتورة هسا؟
هل هذه السيارة الأجرة متاحة ؟	هاي التكسي فاضية؟	هاي السيارة الأجرة موجودة؟
هل يمكن أن تدلني على بعض الفنادق الرخيصة والنظيفة ؟	بصير ادلني عبعض الفنادق الرخيصة والنظيفة؟	بتقدر تدلني على بعض الفنادق الرخيصة والنظيفة؟
أنا مع بعض الأصدقاء .	أنا مع شوية صحاب.	أنا مع بعض الأصدقاء.
لشخصين عند الساعة السابعة , الاسم وتاناب .	لشخصين الساعة سبعة. الاسم وتاناب.	حدا عالساعة سبعة, الاسم وتاناب.
ما هو الإجمالي ؟	شو الإجمالي؟	شو الإجمالي؟
أين يمكنني أن أشتري زلاجات وأحذية ؟	من وين بقدر اشتري زلاجات و أحذية؟	وين بقدر اشتري زلاجات وأحذية؟
ما وجه الاختلاف بين منتجك ومنتج منافسيك ؟	شو الفرق بين منتجك ومنتج الناس اللي بتنافسك؟	شو الفرق بين منتجك ومنتج منافسيك؟
أين تعلم السيد جونز اللغة اليابانية ؟	وين السيد جونز تعلّم اللغة اليابانية؟	وين بتعرف الاستاذ جونز اللغة اليابانية؟
لا يمكنني وضع الأمتعة تحت المقعد . هل لك أن تحتفظ بها لأجلي من فضلك ؟	أنا ما بقدر أحط شنطي تحت المقعد. ممكن تخبيلي ياهم لو سمحت؟	ما بقدر أحط الشناتي تحت الكرسي. بتقدر تخليلي الشناتي لو سمحت؟
هل يمكنك أن تستدعي موظفاً يتحدث اليابانية ؟	ممكن تنادي موظف بحكي بالياباني؟	بتقدر تنادي حدا بحكي ياباني؟
سوف أبلغ الشرطة بذلك .	راح أبلغ الشرطة بهاظ الإشي.	رح أخبر الشرطة هيك.
عيد ميلادك اقترب .	عيد ميلادك قرب.	عيد ميلادك اقترب.
تعثر صديقي والتوي كاحله .	صاحبي وقع والتوى كاحله.	تلاقي صاحبي و تنزل كاحله.
نعم , أعتقد ذلك .	اه، بتوقع هيك.	اه, أتوقع هيك.
اتجاه واحد .	اتجاه واحد.	اتجاه واحد.
هلاّ جعلت توقيعك هنا والحروف الأولى من اسمك هنا .	هات خلي توقيعك هون وأول حروف اسمك هون.	ممكن تخلي توقيعك هون والحروف الأولى من اسمك هون.
أين يمكن أن أوقف سيارتي ؟	وين ممكن أقف سيارتي؟	وين ممكن أوقف سيارتي؟
سأغلق الآن . شكراً على انتباهكم .	رح أسكر هسا. شكراً على انتباهكو.	راح أسكر هسا. شكراً على الاهتمام.
اللعنة . اللعنة . اللعنة . اللعنة . لقد كبرت معتاداً على وجهها .	يلعن. يلعن. يلعن. يلعن. أنا تعودت كثيرعلى وجهها.	اللعنة. اللعنة. اللعنة. اللعنة. كبرت معتادا على وجهها.
سنراك في الغد .	رح نشوفك بكرة.	رح نشوفك بكرة.
عندي ثلاثة أطفال .	عندي ثلاث ولاد.	عندي ثلاث أطفال.
نعم ، هي ، لأنك تستطيع أن ترى العلم أمام مكتب البريد .	صح، هي . لأنه بتقدر تشوف العلم قدام مكتب البريد.	اه، هي، لأنك بتقدر تشوف العلم قدام البريد.
هل تستطيع إنزال أمتعي إلى الردهة غداً صباحاً ؟	ممكن تنزل أغراضي على الردهة بكرة الصبح؟	بتقدر تنزل شناتيي للردهة بكرا الصبح؟
أربع ليالي .	أربع ليالي.	أربع ليالي.
دقيقة فقط ، من فضلك .	ديقة بس، لو سمحت.	دقيقة بس ، لو سمحت.
هل ستواجهني أية صعوبات في الجمارك ؟	راح ألاقي أي صعوبة بالتعامل مع الجمارك؟	رح تواجهني أي مشاكل بالجمارك؟
هلا أخبرتني كيفية تعديلها من فضلك ؟	ممكن تحكيلي كيف اعدلها لو سمحت؟	ممكن تحكيلي كيف أغيرها لو سمحت؟
حسنا ، لا أعلم بعد لكنني سوف أحاول بالتأكيد .	ماشي، مش عارف لحد الآن بس رح أحاول أكيد.	ماشي، ما بعرف بعد بس رح أحاول أكيد.
موعده المقرر هو الثامنة والنصف مساءْ بالتوقيت المحلي .	موعده هو الساعة ثمنية ونص المسا بالتوقيت المحلي.	موعده هو الساعة ثمانية ونص المسا بالتوقيت المحلي.
هل يمكن أن تضع حقيبة السفر هذه في صندوق السيارة .	ممكن لو سمحت تحطلي شنة السفر هاي بالطبون ؟	بتقدر تحط شنتة السفر هاي بصندوق السيارة؟
هذه ليست تفاحة ولكنها خوخة .	هاي مش تفاحة هاي خوخة.	هاي مش تفاحة بس هي خوخة.
إذا كان بالإمكان ، لم أكن لأخلع السنّة .	اذا ممكن، أنا بفضل ما تقلع السن.	إذا كان ممكن، ما كنت أقدر أخلي السنه.
علي أن أفحص ذلك مع زوجتي .	لازم أشوف الموضوع مع مرتي.	لازم أفحص هاد مع زوجتي.
لا أعتقد أن هذه السكينة نظيفة . أيمكنك أن تُحضر لي واحدة أخرى ؟	أنا ما بظن إنه هاي السكينة نظيفة. بتقدر تجبلي وحدة تانية؟	ما بتوقع انه هاي السكينة نظيفة. بتقدر تجيبلي وحدة ثانية؟
املأ البنود الآتية في بطاقة التسجيل .	املي البنود اللي جاية على كرت التسجيل.	حط البنود الآتية ببطاقة التسجيل.
ما الذي يمكن أن أراه في هذه الجولة ؟	شو بقدر أشوف بهاي الرحلة؟	شو ممكن أشوف بهاي الجولة؟
هل هذا المتبل حار ؟	هاظ المتبل حار؟	هاد المتبل حامي؟
هذه كلها مطبوعات .	هاي كلها مطبوعات.	هاي كلها مطبوعات.
هذه هديه لصديق .	هاي هدية لرفيقي.	هاي هديه لصاحبي.
أراهن بخمسة دولارات .	براهن بخمس دولارات .	اراهن بخمس دولارات.
هل توجد أية جولة صباحية ؟	في أي جولات صباحية؟	في أي جولة الصبح؟
سنمكث .	راح نظل.	رح نضل.
هل توجد غرفة استراحة عامة بالقرب من هنا ؟	في غرفة استراحة عامة جنبنا هون؟	في غرفة استراحة عامة قريبة من هون؟
آسف ، لقد تحققت من إدارة الخدمة وإدارة المفقودات ولم أجدها عندهم .	بعتذر، تأكدت من إدارة الخدمة وإدارة المقودات وما لقيتها عندهم.	آسف، خلصت من إدارة الخدمة وإدارة المفقودات ولم أجدها عندهم.
هل قلت لي كيف أذهب إلى المتحف ؟	قلتلي كيف بروح على المتحف؟	بتقدر تقلي كيف أروح عالمتحف؟
لا أريد إنفاق أكثر من عشرين دولاراً .	ما بدي أصرف أكثر من عشرين دولار.	ما بدي أصرف أكثر من عشرين دولار.
هذا المكان مكتظ بالناسب ، أليس كذلك ؟	هاظ المكان معبى ناس، مش هيك؟	هاد المكان مكتظ بالناسب، صح؟
سأحضر المدرسة الصيفية بجامعة هاواي .	رح أداوم بالمدرسة الصيفية بجامعة هاواي.	راح أروح على المدرسة الصيفية بجامعة هاواي.
من فضلك اعطني تصريحاً سارياً لمدة أسبوع .	لو سمحت أعطيني اذن لمدة أسبوع.	لو سمحت اعطيني تصريح ساري لمدة اسبوع.
ما هذا من فضلك ؟	شو هاظ لو سمحت؟	شو هاد لو سمحت؟
سأحتاج إلى بطاقة ائتمان .	راح أحتاج الفيزا .	بدي بطاقة ائتمان.
إذن دعنا نبطنها من الداخل .	معناته خلينا نحشيها من جوا.	طيب خلينا نبطنها من جوا.
هل هذه محطة قطار سريع ؟	هاي محطة اكسبريس؟	هاي محطة القطار سريع؟
من ثمانية إلى اثنى عشر من فضلك .	من ثمانية ل اثنعش لو سمحت.	من ثمانية لاثنعش لو سمحت.
أود قياس بذلة السباق الخاصة بي .	بدي اقيس بدلة السباق تبعتي.	بدي أعرف بذلة السباق تبعي.
لقد طلبته منذ وقت طويل .	طلبته من زمان.	طلبته من زمان طويل.
أين الحمام ؟	وين الحمام؟	وين الحمام؟
اليابانيون لا يأخذون إجازات طويلة .	اليبانيين ما بيوخذو عطل طويلة.	اليابانيين ما بأخذو اجازات طويلة.
هاهي .	هيها .	هاي.
أنها مناسبة تماما .	زابطة تماما.	هي مناسبة تماما.
مرحبا . هذه هي الخطوط الجوية المتحدة .	مرحبا . هاي هي الخطوط الجوية المتحدة .	مرحبا. هاي هي الخطوط الجوية المتحدة.
أعيش في شقة إيجارها ثمانون ألف ين في الشهر .	بعيش بشقة، الإجارتها ثمانين ألف ين بالشهر.	بسكن في شقه إيجارها ثمانين ألفين بالشهر.
هل هناك أماكن شاغرة بالنسبة لرحلة الخميس ؟	في أماكن فاظية برحلة يوم الخميس؟	في أماكن فاضية لرحلة الخميس؟
أعرف نادي قديم لموسيقى الجاز بوسط البلد .	بعرف نادي قديم لموسيقى الجاز بوسط البلد.	بعرف نادي قديم بموسيقى الجاز بوسط البلد.
هل انعطف يساراً ؟	بدي ألف يمين؟	لف شمال؟
أحبه فعلاً .	بحبه فعلا.	حبيته فعلاً.
من فضلك احفظ هذه الحقائب في محتجز الجمارك .	لو سمحت خلي هالشنتات بالجمارك.	لو سمحت خلي هاي الشناتي مع محتجز الجمارك.
هل يمكنني استخدام إِشارة ضوئية ؟	ممكن استعمل إشارة ضوئية؟	بقدر أستخدم إشارة ضوئية؟
أعمل في شركة نشر .	بشتغل بشركة نشر.	بشتغل بشركة نشر.
اتجه يساراً في هذا الشارع ثم انعطف عند أول منعطف يمين .	روح يمين بهالشارع وبعدين اتوجه يمين عند اول منعطف.	روح على هاد الشارع بعدين لف عند أول منعطف يمين.
بالفعل لدي أخبار . أنا سأتزوج .	فعلياً، عندي أخبار. أنا بدي أجوز.	بالفعل عندي خبر. أنا رح أتزوج.
واحد هامبرجر وواحد شيز برجر ، من فضلك .	واحد همبرقر وواحد شيز برقر، لو سمحت.	واحد هامبرجر وواحد شيز برجر، لو سمحت.
أوه ، آسف . كانت هناك مشاكل ونحن نقوم بحلها ، هل تتفضل بالانتظار لمدة ثلاثين دقيقة ؟	أووه، أنا آسف. كان في مشاكل منحلها. ممكن تستنى لثلاثين دقيقة؟	أه، آسف. كانت هناك مشاكل ونحن بنعملها، بتحب تستنى ثلث دقايق؟
كم عددها ؟	كم عددها ؟	قديش عددها؟
و هو كذلك . سأوصلك إلى هناك .	و هو هيك . رح اوصلك لهناك.	هو هيك. رح اوصلك لهناك.
أريد فندق أرخص قليلاً .	بدي فندق أرخص شوي.	بدي فندق أرخص شوي.
الأجدر بك أن تكف عن ذلك .	أحسنلك تبطل هالاشي.	أغلبك تخلي هيك.
هل أي من المتاجر الكبيرة به يعمل الآن ؟	في أي مول فاتحة هسه؟	في محلات كبيرة بتشتغل هسا؟
كم تستغرق حتى تصبح متاحة .	قديش بدها حتى تصير فاظية .	قديش بدك حتى تصبح متاحة؟
معذرة . أريد أن أطلب طلب .	معلش . بدي أطلب طلب .	معذرة. بدي أطلب طلب.
عندنا حفلة مساء الجمعة . لماذا لا تنضم لنا ؟	عنا حفلة يوم الجمعة بالليل. ليش ما تيجي معنا؟	عنا حفلة يوم الجمعة. ليش ما تنضمنا؟
كيف أستقلها ؟	كيف اركبهاا؟	شلون أركبها؟
هل هي جولة يوم كامل ؟	هي الرحلة ليوم كامل؟	هي جولة يوم كامل؟
في أي وقت يمكنني مغادرة الفندق ؟	بأي ساعة ممكن أعمل خروج من الفندق؟	بأي وقت بقدر أروح على الفندق؟
أحضر لي بعض من الجبن المبشور .	هاتلي شوي من الجبنة المبروشة.	جيبلي شوية الجبنة المبشورة.
هل لديك أحذية حريمي عند أصابع القدم ؟	عندك كنادر ستاتي مفتوحة من عند الأصابع؟	عندك أحذية حريمي عند أصابع القدم؟
هذه كبيرة جداً .	هاي كثير كبيرة.	هاي كبيرة كثير.
نبيذ غير حلو ، من فضلك .	واين بدون سكر، لو سمحت.	نبيذ مش حلو، لو سمحت.
تبلغ الميزانية أقل من ألف دولار .	الميزانية أقل من ألف دولار.	المبلغ أقل من الف دولار.
إنها معطلة . هل تستطع فحص آلة التصوير هذه ؟	هاي معطلة. بتقدر تشيّك على آلة التصوير هاي؟	هيشغالة. بتقدر تشوف الكاميرا هاي؟
لقد كان هناك حادث مرور .	كان في حادث سير.	كان هناك حادث.
إجمالي سكان اليابان حوالي مائة وثلاثين مليوناً .	العدد الكلي لسكان اليابان حوالي مية وثلاثين مليون.	سكان اليابان تقريبا مية وثلاثين مليون.
أي نوع من الملابس ؟	أي نوع من الأواعي ؟	شو نوع الاواعي؟
في أي مجال كان من قبل ؟	بأي مجال هو كان قبل؟	بأي مجال كان من قبل؟
كم تتكلف الليموزين للذهاب إلى وسط المدينة ؟	قديش تكلف الليموزين عشان نروح عوسط البلد؟	قديش بتكلف الليموزين حتى تروح على وسط البلد؟
الاسم هو جورو موتوياما . والرقم هو صفر ثلاثة ثلاثة اثنان ستة واحد اثنان أربعة تسعة خمسة .	الاسم هو جورو موتوياما . والرقم هو صفر ثلاثة ثلاثة اثنان ستة واحد اثنان أربعة تسعة خمسة .	الاسم هو جورو موتوياما. والرقم هو صفر ثلاثة ثلاثة اثنين ستة واحد اثنين أربعة تسعة خمسة.
لا ، ولكن شكراً لك . إنني أشعر بتحسن .	لا، بس شكرًا هونيك. أنا حاسس انو صرت أحسن.	لا، بس مشكور. أنا حاس حالي احسن.
هل لك أن نبدل مقاعدنا من فضلك ؟	ممكن نبدل كراسينا لو سمحت؟	ممكن نبدل الكراسي لو سمحت؟
هل هناك مكان يتم فيه عزف الموسيقي الريفية ؟	ما في أي مكان بعزف ألحان ريفية؟	في مكان فيه عزف الموسيقى الريفية؟
هلا أخبرتني قبل أن نصل إلى درهام ؟	بصير تخبرني قبل ما نوصل لـ درهام؟	ممكن تحكيلي قبل ما نوصل درهام؟
ظل سائراً عبر هذا الممر , وستجدها على الجانب الأيمن .	ظل ماشي بالممر هاذ , و رح تلاقيها عالجهة اليمين.	ظل مشي على هاد الممر, راح تلاقيها على الجهة اليمين.
أشعر بصداع .	بحس بصداع.	حاس حالي بوجع.
عامل الصيانة سيصعد في الحال .	عامل الصيانة راح يطلع مباشرة.	عامل الصيانة رح ينزل بسرعة.
هل تمانع في جلوسي هنا ؟	بتمانع لو اقعد هون؟	عندك مانع تشوفي هون؟
لقد قمت بزيارة البحيرات الكبرى لأول مرة .	هاي أول مرة بزور البحيرات الكبرى.	جبت بزيارة البحيرات الكبيرة أول مرة.
أصبت بالتهاب في الحلق .	التهب حلقي .	انبسطت بالتهاب بالحلق.
نسافر جواً ثلاث مرات في الأسبوع ، أيام الثلاثاء والجمعة والسبت .	بنسافر بالطيارة ثلث مرات بالأسبوع، الثلاثاء، الجمعة والسبت.	بدنا نسافر جوا ثلاث مرات بالسبوع، أيام الثلاثاء والجمعة والسبت.
نعم . أيقظني من النوم بعد ثلاثة ساعات , من فضلك .	أيوة . صحيني من النوم بعد ثلاث ساعات, لو سمحت.	اه. خليني أنام بعد ثلث ساعات, لو سمحت.
إلى أين يجب علي أن أنقل ؟	لوين لازم أحول؟	وين لازم أروح؟
لا أعرف كثيراً عن النبيذ ؟ ماذا يناسب هذا الطبق ؟	أنا ما بعرف كثير بالواين. شو بنفع مع هاذ الأكل؟	ما بعرف اشي عن النبيذ؟ شو رايح بهالطبق؟
وللشرب ؟ .	بتشرب إشي ؟ .	للأكل؟
نعم ، هذا لا يشمل الوجبات .	أيوة، هاذ ما بشمل الأكل.	اه، هاد مش شامل الوجبات.
قمة جبل " فوجي " هي اعلي قمة جبلية في اليابان حيث يبلغ ارتفاعها ثلاثة آلاف وسبعمائة وستون مترا .	جبل فوجي هو أعلى قمة باليابان على ارتفاع ثلاثة ألاف وسبعمية وستين متر.	قمة جبل "فوي" هي اعلي قمة جبلية باليابان حيث ارتفاعها ثلاثة آلاف وسبعمية وستين متر.
هل يمكن أن ترسل أحدا ؟	ممكن تبعت حدا؟	ممكن تبعثلي حدا؟
هل من الممكن أن تفصل أكثر ؟	يتقدر توضح أكثر ؟	بتقدر تفصل أكثر؟
أريد واحدة حديثة .	بدي وحدة جديدة.	بدي وحدة حديثة.
حسنا ، ولكن ليس منطقة المقاعد المكشوفة . فاليوم شديد الحرارة .	طيب ، بس مش على مكان الكراسي المكشوفة. اليوم كثير شوب.	ماشي، بس مش منطقة الكراسي المكشوفة. اليوم شديد الحرارة.
سأرسلها لك ، لذا من فضلك انتظر هنا .	راح أبعثها الك، عشان هيك استنى هون لو سمحت.	رح ابعثها لك، لذا لو سمحت استنى هون.
أخشى أن يكون هناك خطأ في الفاتورة .	خايف يكون في غلط بالفاتورة.	خايف يكون هناك خطأ بالفاتورة.
هذا بارد إلى حد ما . هل يمكن أن تقوم بتسخينه ؟	هاظا بارد شوي. ممكن تسخنه؟	هاد بارد شوي. بتقدر تسخينه؟
هلا راقبت حقيبتي من فضلك ؟	ممكن تراقبلي شنتي ، لو سمحت؟	ممكن تشوف شنتي لو سمحت؟
لا امتلك أي نقود .	ما معي مصاري.	ما عندي مصاري.
أريد عامل تشغيل يتحدث اليابانية من فضلك .	بدي شغيل بيحكي ياباني لو سمحت.	بدي عامل تشغيل بحكي ياباني لو سمحت.
يبدو أنها نادرة جداً .	شكلها نادرة كثير.	شكلها نادرة كثير.
إنني على يقين أن المجرم قريب .	أنا متأكد إنه المجرم قريب.	أنا متأكد انه المجرم قريب.
أجل ، أظن أني سوف أنظر .	ايوا، بظن إني رح اطلع.	أه، بظن اني رح أشوف.
هل يوجد أحد يستطيع العزف على البيانو ؟	في أي حدا بعرف يعزف عالبيانو؟	في حدا بقدر العزف على البيانو؟
لستُ معتمداً قانونياً .	أنا مش مؤهل.	مش معتمد قانوني.
هل يمكنك أن توصل أمتعتي إلى الغرفة ؟	ممكن توصل اغراضي للغرفة؟	بتقدر توصل اغراضي للغرفة؟
هل الشوارع الخلفية خطر ؟	الشوارع الخلفية خطرة ؟	الشوارع الخلفية خطر؟
هل لك أن توقظني في تمام السادسة من فضلك ؟	بتقدر تصحيني الساعة ستة، لو سمحت؟	ممكن اقعد عالساعة ستة لو سمحت؟
أشعر بحالة سيئة وغثيان .	حاس بلعية ووظعي زفت.	حاس حالي سيء وجع.
لقد اتصلت منذ ثلاثة أيام بخصوص حقيبة ضائعة .	اتصلت من ثلاث أيام عشان شنتة ظايعة.	رنيت من ثلث ايام بخصوص شنتة ضائعة.
بضع دقائق أخرى من فضلك .	كم دقيقة كمان اذا سمحت.	شوية دقايق لو سمحت.
لم أدرك الرحلة رقم عشرون المتجهة إلى سان فرانسيسكو .	ما لحقت الرحلة رقم عشرين اللي رايحة عسان فرانسيسكو.	ما بعرف الرحلة رقم عشرين اللي رايحة على سان فرانسيسكو.
آه ، عندك ؟ بالتأكيد إن لديك تشكيلة كبيرة .	أها، عندك؟ طبعا إنت عندك تشكيلة كبيرة.	آه، عندك؟ أكيد عندك تشكيلة كبيرة.
بطريقة أبطأ ، من فضلك .	بشكل أبطأ ، لو سمحت.	بطريقة أبطأ، لو سمحت.
إنه لا يلائمني .	مش مناسبني.	مش مناسبني.
هل من الممكن إجراء اتصال على أن يتم تحصيل أجرته من الطرف الآخر ؟	ممكن أعمل مكالمة وتوخذوا حقها من الطرف الثاني؟	بتقدر رنلي عشان تدفع أجرة الطرف الثاني؟
عندك أية شيء يمكن أن أتعاطه للطفح الجلدي ؟	عندك أي اشي ممكن آخذه عشان هاذ الطفح الجلدي؟	عندك إشي بتقدر تعطيه لفحة الجلد؟
هل تفضلت و احتسيت القهوة معي ؟	تتفضل و تشرب قهوة معي؟	بتحب تشرب القهوة معي؟
سأقوم بتسجيل الدخول في تمام الساعة الثامنة مساءاً تقريباً .	راح أنزل بالفندق حوالي الساعة ثمنية المسا .	رح أحجز الدخول عالساعة ثمانية المسا تقريبا.
إننا على ارتفاع اثني عشر ألف قدم .	احنا على ارتفاع اتناشر ألف قدم.	احنا عالارتفاع اثنعش ألف قدم.
لقد تمتعت بإقامتي . شكراً لك .	انبسطت بإقامتي . شكراً الك.	انبسطت بإقامتي. شكراً الك.
أُفضلُ حجرة هادئة .	بفظل غرفة هادية.	أحسن غرفة هادية.
كان يجب تدبير وسيلة مواصلات . ذاهبة إلى بوسطن .	لازم ندبر طريقة أو سيارة رايحة على بوسطن.	كان لازم تدبير وسيلة المواصلات. خلصت من بوسطن.
لقد سرق مسجل الفيديو من غرفتي .	سرقو مسجل الفيديو من غرفتي.	انسرق مسجل الفيديو من غرفتي.
هذا هو طبقنا المميز , سمك موسى المشوي الخاص بدوفر .	هاذ طبقنا الخاص, سمك موسى المشوي الخاص بدوفر.	هاد هو طبقنا المميز, سمك موسى المشوي بدوفر.
هل يمكن أن أختر جريدة يابانية , من فضلك ؟	ممكن اختار جريدة يابانية، لو سمحت؟	ممكن أختر جريدة يابانية, لو سمحت؟
هل لي أن أقاطعكم ؟	ممكن أقاطعكم؟	ممكن أقاطعكم؟
هل يوجد بالقرب من هنا مطعم صيني ؟	في مطعم صيني قريب من هون؟	في قريب من هون مطعم صيني؟
لا أريد أي شيء يكون كبير الحجم .	ما بدي أي اشي ظخم.	ما بدي أي اشي يكون كبير.
هل أنت الأخير في هذا الصف ؟	إنت الأخير بهاذ الصف؟	انت اخر بالصف هاد؟
إن محفظتي نشلت في القطار .	وحدة سرق محفظتي في القطر.	محفظتي نشلت بالقطار.
