# Supplementary material for: Exploring prompting for dialectical machine translation: a focus on north Jordanian Arabic
Source: PeerJ journal article supplement (doi:10.7717/peerj-cs.3209), 2025-11-12
Supplement: Code.zip [file google_mT5_prediction.xlsx]

## Sheet: Sheet1
MSA	IrbidDial	T5
ما رأيك في مشاهدة فيلم آخر ؟	شو رأيك نشوف فيلم ثاني؟	ما رأيك في مشاهدة فيلم آخر ؟
أريد كوبا من الماء لأتناول بعض الدواء , من فضلك .	بدي كاسة مي عشان اوخذ الدوا، لو سمحت.	أريد كأس من الماء لكي أخذ الدواء ، من فضلك.
أبغي كرة .	بدي طابة.	أريد طابة.
كيف تحب أن يصفف شعرك اليوم ؟	كيف بدك يسرحلك شعرك اليوم؟	كيف تريد أن يسرحل شعرك اليوم ؟
أريد رداءا ذات أكمام طويلة .	بدي جاكيت كم طويل.	أريد جاكيتاً طويلاً.
ها-ها . صباح الخير حان دورك . إنه على ما يرام .	هههه. صباح الخير صار دورك. هو كويس.	نعم. صباح الخير حدث دورك. إنه جيد.
أين نتقابل ؟	وين بدنا نتلاقى؟	أين نذهب ؟
لقد أثلج صدري زيارة مقاركم الرئيسية وكذا ما جرى بيننا من مناقشات مهمة . شكراً جزيلاً على ما أبديتموه من تعاون .	فرحت كتير لما زرت مكاتبكم الرئيسية وكمان النقاشات الهمة اللي صارت بيناتنا. كتير شكراً على العون اللي قدمتوه.	لقد فرحت كثيراً عندما زرت مكاتبكم الرئيسية وكمان النقاشات الهمة التي قدمت بيننا. شكراً على العون الذي قدمته لنا. شكراً على العون الذي قدمته.
هل هذا قطار مباشر ؟	هاذ القطار مباشر؟	هل هذا القطار مباشر ؟
إبريق من القهوة ، لطفاً .	بكرج قهوة، لو سمحت.	كرج قهوة ، من فضلك.
كم تكلفة الإفطار ؟	بقديش الفطور ؟	كم سعر الإفطار ؟
من فضلك اختر لي مائدة ذات منظر ليلي لطيف .	من فظلك إختارلي طاولة مع منظر حلو بالليل.	من فضلك اختار لي مائدة مع منظر جميل في الليلة.
أين الحلاق ؟	وين الحلاق؟	أين الحلاق ؟
الشاطئ أسفل يمينا . ياله من منظر رائع .	الشط تحت على اليمين. شو المنظر بجنن.	الشط تحت على اليمين. ما المنظر جميل.
كلاً ، إنهم متينين جداً .	لا، هظول كثير قويات.	لا ، هذا قوي جداً.
اتجه يسارا عند الناصية الثالثة .	روح يسار من عند الدخلة الثالثة .	اتجه يسار من عند الدخول الثالثة.
أين المحطة النهائية للحافلة ؟	وين اخر موقف للباص؟	أين آخر موقف للباص ؟
كم يتقاضى المرشد في اليوم ؟	قديش بيوخذ الدليل باليوم؟	كم يستغرق الدليل اليوم ؟
أريد كيساً من الفشار ، من فضلك .	بدي كيس بوشار، لو سمحت.	أريد جيد بوشار ، من فضلك.
من فضلك غير خمسين آلاف ين إلى دولارات أمريكية .	لو سمحت اصرف الخمسين ألف ين لدولر أمريكي.	من فضلك اصرف خمسون ألف ين إلى دولار أمريكي.
أريد قاموس جيب ، من فضلك .	بدي قاموس بنحط بالجيبة ، لو سمحت.	أريد قاموس لوضع الجيبة ، من فضلك.
من فضلك ، أريد فنجاناً من القهوة البيضاء .	لو سمحت ، بدي فنجان قهوة بالحليب.	من فضلك ، أريد فنجان قهوة بالحليب.
هل يمكن أن أحصل على قمصاني نظيفة غداً صباحاً ؟	ممكن ألاقي قمصاني نظيفات بكرا الصبح؟	هل يمكنني أن أجد قمصاني نظيفات غداً ؟
حسنا , حجرتك يا آنسة هي رقم تسعة صفر ثمانية . هذا مفتاحك .	طيب، غرفتك يا آنسة هي تسعة صفر ثمنية. هاذ مفتاحك.	حسنا ، غرفتك يا آنسة هي تسعة صفر ثمانية. هذا مفتاحك.
نعم ، بالطبع .	أيوا، أكيد.	نعم ، صحيح.
ما تكلفة المقاعد الخاصة بالشرفة ؟	قديش بتكلف الكراسي تبعت البرندة؟	كم تتكلف النافذة التي قدمت البرند ؟
هل لي بدليل سياحي ؟	ممكن مرشد سياحي؟	هل يمكنني مرشد سياحي ؟
أجل ، وأودّ محاسبة المطلوب هاتفياً على قيمة المكالمة .	صح، وأنا بدي احاسب يلي رنيت عليه على حق المكالمة.	حسناً ، وأنا أريد أن أحاسب الذي اتصلت به على حق المكالمة.
جلد التمساح الأمريكي .	جلد التمساح الأمريكي.	جلد التمساح الأمريكي.
سأكون هنا الساعة الثامنة إلى الربع .	رح أكون هون الساعة ثمانية إلا ربع.	سأكون هنا في الثامنة إلى الرابعة.
أظن أن الملابس المصنوعة في اليابان قد جرى تفصيلها على نحو أفضل بالتأكيد .	بتوقع انو الأواعي اللي صنعت في اليابان تفصلت بطريقة أحسن أكيد.	أعتقد أن الأواعي التي صنعت في اليابان تفصلت بطريقة أفضل.
سأكون هناك حوالي السادسة مساءً .	راح أكون هناك حوالي الساعة ستة المسا.	سأكون هناك حوالي الساعة السابعة مساءاً.
لا أجيد الإنجليزية . هل ثمة من يتحدث اليابانية هنا ؟	أنا مش بعرف أحكي إنجليزي. في حدا بحكي ياباني هون؟	أنا لا أستطيع أن أتحدث الإنجليزية. هل يوجد شخص يتحدث اليابانية هنا ؟
إنني أتصل من كشك عمومي في ماسي .	أنا بحكي معك من كشك عام بماسي.	أنا أتحدث بك من كشك عام في مالي.
كم الوقت ؟	قديش الساعة؟	كم الساعة ؟
إنني أبحث عن هذا .	أني بدور على هاظ.	أنا أبحث عن هذا.
لماذا لا تعطيها هدية ؟	ليش ما تعطيها هدية؟	لماذا لا تعطيها هدية ؟
استمتعنا بالعشاء .	كيفنا عالعشا.	كيف نجلس في العشاء ؟
سأذهب بك على مقعدك . من هنا ، من فضلك .	راح اوديك على كرسيك. من هون، لو سمحت.	سأرسلك إلى كرسيك. من هنا ، من فضلك.
سأعود إليك عندما تكون أقل انشغالاً .	راح أرجعلك بس تكون مش مشغول كثير.	سأعود لك لكن تكون مشغولا جداً.
أنا السيد تكاهاشي بالغرفة رقم خمسة تسعة وأربعين . من فضلك أرسل أربع زجاجات من بيرة بودفايزر .	أنا الأستاذ تكاهاشي بالأوضة رقم ٥٩ . لو سمحت بدي أربع بطولين من البيرة بودفايزر.	أنا الأستاذ تكاهاشي في الوضة رقم ٥٩. من فضلك أريد أربع بطولين من البيرة بيدفايزر.
حسنا ، إنه وقت الغداء . هل تحب أن نناقشه على الغداء ؟	ماشي، وقت الاكل صار. بتحب نحكي عنها واحنا ناكل؟	حسناً ، وقت الطعام انتهى. هل تحب أن نقول عنها لنا ؟
هناك الكثير من الينابيع الحارة .	في كثير ينابيع حارة.	إنه كثير من النادل الحرارة.
سر مباشرة ، من فضلك .	روح ع طول، لو سمحت.	اذهب طويلاً ، من فضلك.
هل تمانع إذا التقطت صورة لك ولسيارتك الأجرة ؟	بتمانع لو أخذت صورة إلك وللتكسي تبعتك؟	هل أنت مهذب لو أخذت صورة لك وسيارات أجرة تبعتك ؟
كم من الوقت نحتاج للذهاب مشياً من هنا إلى مبنى البلدية ؟	قديش بدنا وقت عشان نمشي من هون لبناية البلدية؟	كم من الوقت يستغرق أن نذهب من هنا إلى بناية البلدية ؟
هل تستطيع أن تخفض سعرها لوجود بعض البقع بها ؟	بتقدر ترخصها لأنه في عليها شوية بقع؟	هل يمكنك أن ترخصها لأنه هناك بعض القع ؟
شكراً ، هذا يكفي .	شكراً ، هاظ بكفي.	شكراً ، هذا جيد.
أريد الشخص الذي يعد وثائق عادية في حجم ورقة الخطاب بدون الحاجة إلى طيهم .	بدي الشخص اللي بعمل الوثائق اللي بحجم الورق العادي بدون ما يظطر يثنيهم.	أريد الشخص الذي يقوم بعمل الوثائق بحجم الورق العادي دون أن يظطر على ثنيهم.
هل نحتاج إلى طرح هذا للتصويت ؟ إن لم نكن في حاجة إلى هذا ، فإمكاني أن أعتقد حينئذ أننا قد وصلنا إلى نتيجة , سأقوم بإرسالها إلى مجلس إدارتنا صباح غد .	هل احنا محتاجين نحط هاظ للتصويت؟ اذا لأ، بتوقع أنه وصلنا للنتيجة، بدي أبعثها لمجلس ادارتنا بكرا الصبح.	هل نحتاج إلى وضع هذا للتصويت ؟ إذا ، أعتقد أننا وصلنا إلى النتيجة ، أريد أن أرسلها إلى مجلس ادارتنا غداً صباحاً.
أين مترو الأنفاق ؟	وين المترو؟	أين المترو ؟
كنت أفكر في الحصول على هذه الدورة في فترة نصف العام المقبلة .	كنت بفكر أوخذ هالكورس بفترة نص السنة الجاية.	كنت أفكر في حصول على هذا الكورس في فترة نصف العام القادم.
الخامس عشر من سبتمبر يوم احترام المسنين .	خمسطعش تسعة هو يوم احترام المسنين.	خمس عشر تسعة هو يوم احترام المسنين.
ارفعوا أيديكم .	ارفعوا إيديكو	ارفعوا إيديكو.
أين موقف الحافلات ل بي ؟	وين مجمع الباصات ل بي ؟	أين موقف الحافلة إلى بي ؟
قم بدفعها من فضلك , إن كان ذلك ممكنا .	لو سمحت دزها , إذا بصير	من فضلك دعها ، من فضلك.
لقد نسيت أن آخذ حقيبتي اليدوية .	نسيت آخذ شنتة الإيد.	لقد نسيت أن آخذ حقيبة اليد.
فكرة صائبة . متى تخطط للمجيء ؟	فكرة صحيحة. متى بتنوي تيجي؟	فكرة صحيحة. متى تنوي أن تأتي ؟
اثنان ويسكي مع الماء , من فضلك .	تنين ويسكي مع مية, لو سمحت.	تنين ويسكي مع مائة ، من فضلك.
على فكرة , هل أنت غير مشغول السبت القادم ؟	بالمناسبة، راح تكون فاضي السبت الجاي؟	بالمناسبة ، هل ستكون فاضي السبت القادم ؟
هل لديك هذا باللون الأخضر الداكن ؟	عندك هاذ باللون الاخضر الغامق؟	هل لديك هذا باللون الأخضر الغامق ؟
هالو ، هل هذه تعود إلى روي ؟	مرحبا، هاي لروي؟	مرحباً ، هل هذه إلى روي ؟
أريد حامل ثلاثي .	بدي حامل ثلاثي.	أريد حامل ثلاثي.
عظيم . كنت أبحث عن سيارة أجرة لكن هذا أفضل .	كتير حلو. كنت قاعد بدور على تاكسي بس هاي احسن.	حقاً جميل. كنت أبحث عن سيارة أجرة لكن هذا أفضل.
ثلاثة اثنان واحد اثنان . انتظر ثانية ، حسنا ؟ أريد أن أرسل لك شيئاً هنا . معذرة .	ثلاثه اثنين واحد اثنين. استناني شوي , طيب؟ بدي أبعثلك اشي هون. اعذرني.	ثلاثة اثنان واحد اثنان. لقد استدعي بعض الوقت ، أليس كذلك ؟ أريد أن أرسل لك شيئاً هنا. أعذرني.
حسنا ، إنه باهظ الثمن . إنه لم يصنع في اليابان ، أليس كذلك ؟	تمام ، هو غالي .اكيد مش صنع اليابان، مش؟	حسناً ، إنه غالي. لكنه لا صنع اليابان ، أليس كذلك ؟
ويسكي اسكتلندي وماء من فضلك .	ويسكي اسكتلاندي ومية لو سمحت.	ويسكي اسكتلندي ومية من فضلك.
هل توجد أية كازينوهات جيدة ؟	في أي كازينوهات حلوة؟	هل توجد أي كازينوهات جميلة ؟
إنها عاملتني كما لو كنت متسولاُ .	عاملتني كإني شحاد.	لقد عاملتني كأنه شحاد.
شخص ما فتح الطرد الخاص بي .	في حد فتح الطرد تبعي.	هل هناك حد فتح الطرد ؟
هل تريد أن افحص موتور السيارة ؟	بدك ياني أفحص ماتور السيارة؟	هل تريد أن أفحص ماتور السيارة ؟
أنا في نزهة طويلة سيرا على الأقدام .	أني طالعة برحلة طويلة تمشاية عجري.	أنا في رحلة طويلة تمشاية عجري.
هذه الأيام ، استخدم الكمبيوتر بشكل دائم في العمل .	هاي الأيام ، أنا بستخدم الكمبيوتر دايماً بالشغل.	هذه الأيام ، أنا أستخدم الكمبيوتر دائماً في العمل.
موظفو المبيعات في هذا المتجر لطفاء جداً .	موظفين المبيعات بهاذ المحل لطيفين كثير.	مديرين المبيعات في هذا المحل لطيفون جداً.
الثاني من على اليسار .	الثاني عالشمال .	الثاني على اليمين.
هل أنزل هنا لمركز روكفيلر ؟	أنزل من هون عمركز روكفيلر؟	هل أنزل من هنا إلى مركز روكفيلر ؟
هذه السيدة كاوازو في غرفة رقم ستة عشر أحدى عشر .	هاي الست كاوازو بالغرفة سطعش إحدعش.	هذه الست كاوازو في الغرفة سطعش إحدى عشر.
هل تستطيع خفضها حتى عشرين دولار ، من فضلك ؟	بتقدر تنزلها لعشرين دولار، لو سمحت؟	هل يمكنك أن تنزلها إلى عشرين دولاراً ، من فضلك ؟
أشعر بتحسن .	حاس بتحسن.	أشعر بتحسن.
هل يمكنكم صرف الشيك ذو المائتي دولار الخاص بي ؟	بتقدروا تصرفولي الشيك أبو الميتين دولر تاعي؟	هل يمكن أن تصرف الشيك أبو الميتين دولاراً على وجه دفعي ؟
ولكن لا ضرورة لدفع بقشيش .	بس ما في داعي للبخشيش.	لا يوجد أي داعي للبخشيش.
لقد جاء لتوه .	جا هسا.	جا حالاً.
لنتصل به .	خلينا نرلنه.	دعنا نرينه.
بالمناسبة ، اسمي هيروش إيجيما .	بالمناسبة، اسمي هيروشي ايجيما.	بالمناسبة ، اسمي هيروشي ايجيما.
التاسع والعشرون من أغسطس .	تسعه وعشرين من آب.	تسعة وعشرون من أكتوبر.
هل لا زال لديكم مقاعد لعرض الليلة ؟	ظل في عندكم محلات لعرض الليلة؟	هل لديكم محلات لعرض الليلة ؟
أريد القيام بحجز للساعة الثالثة والنصف ظهراُ .	بدي أعمل حجز للساعة ثلاثة ونص الظهر.	أريد أن أقوم بالحجز في الساعة الثالثة والنصف ظهراً.
سوف نحضرها الآن . ما هو رقم غرفتك ؟	رح نجيبها هلا . شو رقم غرفتك ؟	سوف نحضرها الآن. ما هو رقم غرفتك ؟
رقم غرفتي هو ثلاثة ستة وعشرين . هل يمكن أن تأخذ الغسيل ؟	رقم غرفتي هو ثلاثة ستة وعشرين. بصير توخذ الغسيل؟	رقم غرفتي هو ثلاثة ستة وعشرون. هل يمكنك أن تأخذ الغسيل ؟
أليس لديك دروس تجريبية ؟	ما عندك كورسات تجريبية؟	لا لديك كورسات تجريبية.
رحلة الطيران دلتا رقم ثمانية وعشرون والمتجهة إلي نيو أورلينز سوف تتأخر حوالي ساعة .	رحلة الطيارة دلتا رقم ثمانية وعشرين اللي رايحة على نيو أورلينز حتى تتأخر حوالي ساعة.	رحلة الطائرة دلتا رقم ثمانية وعشرون المتجهة إلى نيو أورلينز حتى تتأخر حوالي ساعة.
هل لديكم غرفة متاحة الليلة ؟	عندكم غرفة فاضية الليلة ؟	هل لديكم غرفة فاضية الليلة ؟
بصراحة ، لا أتفق مع ذلك .	بصراحة، ما بتفق مع هاظ.	حسناً ، لا توافق مع هذا.
هل لك أن تتفضل وتملأ هذه ؟	بتقدر تتكرم و تعبي هاي؟	هل يمكنك أن تفضل و تعبي هذه ؟
يبدو أن النقود التي أعطيتني إياها ناقصة عشر دولارات .	شكله المصاري اللي إنطيتني اياها ناقصة عشر دولارات.	يبدو أن المصاري التي أعطيتني ناقصة عشرة دولارات.
بالخارج .	برا.	أين ؟
أريد ما يخصني لكي أرحل .	بدي اللي بخصني مشان أروح.	أريد ما يخصني للذهاب.
هل يمكن أن ترسلها إلى عنواني في اليابان عن طريق بريد الطرود الدولي وتحصل الثمن من هناك ؟	ممكن توديها على عنواني باليابان عن طريق صفحة الطرود الدولي و توخذ حقه من هناك ؟	هل يمكنك أن ترسلها إلى عنواني في اليابان عبر صفحة الطرود الدولية وتأخذ حقه من هناك ؟
أين قسم السيدات ؟	وين قسم النسوان؟	أين قسم النسوان ؟
إنه ألم حاد .	هو وجع قوي.	إنه وجع شديد.
إنني في نفس السن .	أني بنفس العمر.	أنا في نفس الالعمر.
فكرة جميلة .	فكرة حلوة.	فكرة جميلة.
هل الأجانب يمكنهم الحصول على الكتب في المكتبة ؟	بقدروا الأجانب يستخدموا الكتب بالمكتبة؟	هل يمكن أن يستخدم الأجانب الكتب في المكتبة ؟
تحية . أنا جون .	مرحبا. أني جون.	مرحباً. أنا جون.
هل يمكن أن نبدأ اللعب عندما ينتهون ؟	بنقدر نبلش نلعب لما يخلصوا؟	هل يمكننا أن نلعب عندما ينتهي ؟
مائة وخمسة وثلاثون ين للدولار الواحد .	مية وخمسة وثلثين ين للدولار الواحد.	مائة وخمسة وثلثين ين للدولار الواحد.
نعم . انتظر , سوف احضر لك واحدة .	طيب. استنى، راح أجيبلك وحدة.	حسناً. استمر ، سأحضر لك واحدة.
هلا أنزلتني عند فندق هلتون من فضلك ؟	ممكن تنزلني عند فندق الهيلتون لو سمحت؟	هل يمكنك أن تنزلني عند فندق هيلتون من فضلك ؟
أين الاستعلامات الرياضية ؟	وين الاستعلامات الرياضة؟	أين الاستعلامات الرياضية ؟
هذه هي فلوس أقلام الحبر . فاتورة بمائة دولار .	هايذ حق قلام الحبر. فاتورة بمية دولار.	هذا حق قلام الحبر. فاتورة بمائة دولار.
لا ، شكراً . من الأفضل أن لا أشرب المزيد .	لا، شكراً. احسنلي ما أشرب اكثر من هيك.	لا ، شكراً. أفضل أن لا أشرب أكثر من هذا.
بما في ذلك الإفطار ، والضريبة ، ورسم الخدمة ، سيكون الحساب خمسة أربعون دولارا للشخص الواحد في الليلة .	بتشمل الفطور، الضرايب، ورسم الخدمة، الحساب رح يكون خمسة وأربعين دولار للواحد في الليلة.	يضم الفطور ، الضرايب ، ورسم الخدمة ، الحساب سيكون خمسة وأربعين دولاراً للواحد في الليلة.
ما عرض الأوبرا اليوم ؟	شو عرض الأوبيرا اليوم؟	ما هو عرض الأوبيرا اليوم ؟
أريد مقعداً يطل على الممر ، من فضلك .	بدي كرسي يطل عالممر، لو سمحت.	أريد مقعد يطل على الممر ، من فضلك.
أجل أريد شيئاً أقرؤه .	أيوا بدي إشي أقراه.	أيوا أريد شيئاً أقراه.
غير محتمل بدرجة كبيرة .	بنطاقش بدرجة كبيرة.	إننا نطاقش بدرجة كبيرة.
هل تعرف المطعم يا كيويا ؟	بتعرف المطعم يا كيويا؟	هل تعرف المطعم يا كيويا ؟
يستطيع الصرافون أن يغيروا دولاراتك من أجل بقشيش الكازينو . هل نذهب ؟	السمسارين بقدروا يصرفولك الدولرات عشان بخشيش الكازينو. بصير نروح؟	هل السمسارين يمكنون أن يصرف لك الدولارات لكي نذهب إلى الكازينو. هل يمكننا أن نذهب ؟
يسعدنا أن نقدم لك الشراب الذي تريده متبوعاً بالغداء . دليل كامل بالمشروبات التي نقدمها على رحلتنا موجودة في دليل المعلومات الخاص بمجلتنا .	بسعدنا إنه نقدملك العصير اللي بتختاره وبيلحقه الغدا . منوفر قائمة كاملة من الشراب في هاي الرحلة موجودة بقسم المعلومات تاع مجلتنا.	سعدنا أن نقدم العصير الذي تختاره ولحقه الغداء. هناك قائمة كاملة من الشراب في هذه الرحلة موجودة في قسم المعلومات التابعة لمجلتنا.
هل أستطيع تأجير أداة للتنفس أثناء السباحة ؟	بقدر أستأجر شغلة للتنفس خلال السباحة؟	هل يمكنني أن أستأجر شغلة للتنفس خلال السباحة ؟
آه . هل يمكنني الحصول على وجبتي فيما بعد ؟ أنا أشعر أنني لست على ما يرام الآن .	ممم. ممكن أخد وجبتي بعدين؟ حاسس حالي مش على بعضي هسا.	حسناً. هل يمكنني أن أخذ وجباتي حالا ؟ أظن أنني لا أستطيع أن أخذ وجباتي حالا.
ما هو رقم الرحلة الجوية ؟	شو رقم رحلة الطيران؟	ما هو رقم رحلة الطيران ؟
أبغي تأجير سيارة من هذا الطراز لمدة يومين .	بدي استأجر سيارة من هاذ الموديل لمدة يومين.	أريد استئجار سيارة من هذا الموديل لمدة يومين.
أنا غير متأكد إذا كنت قد حزمت ملابس كافية لرحلة مدتها ثلاثة أيام .	أنا مش متأكد اذا جهزت وعية بتكفيني لرحلة مدتها ثلاث أيام.	أنا لا أعلم إذا جهزت وعاء بتكفيني لرحلة مدتها ثلاثة أيام.
يوجد بجانب هذا المبني تحديداً .	هو جنب هاذ المبنى بالتحديد .	إنه جنب هذا المبنى بالتحديد.
هه . هذه . يبدو اللون جميلاً عليك .	هه. هاي. شكل اللون حلو عليك كثير.	نعم. هذا. يبدو أن اللون جميل للغاية.
هل أستطيع تناول غذائي الآن ؟	ممكن أوكل هسا؟	هل يمكنني أن أتناول الآن ؟
هل يتوقف القطار في برايتون ؟	بوقف القطار عند برايتون؟	هل يوقف القطار عند برايتون ؟
من المهم جدا أننا نستطيع الوصول إلى المواد الخام التي نحتاجها في المشروع .	اشي كثير مهم إنه قدرنا نوصل لمجموعة المواد الأساسية اللي راح نحتاجها للمشروع.	أمر عظيم أننا نستطيع الوصول إلى مجموعة المواد الأساسية التي سنحتاجها للمشروع.
أود أن أطلب بدلة داكنة من أجلي .	بدي أطلب بدلة لونها غامق عشاني.	أريد طلب بدلة لونها غامق عشاني.
هذا جيد . متى هو ؟	هيك تمام. متى رح يكون؟	هذا حسن. متى سيكون ؟
أرغب في شراء شامبو .	أنا بدي أشتري شامبو.	أنا أريد شراء شامبو.
خمسون جنيهاً .	خمسين قنيه.	خمسون سنتاً.
لا يوجد رسم ضروري .	مش موجود رسم ظروري.	لا يوجد رسم ظروري.
هل كان لديك أية خدمات أخرى إلى جانب طعام الإفطار هذا الصباح ؟	في عندك أي خدمات ثانية غير فطور الصبح؟	هل لديك أي خدمة أخرى غير فطور الصباح ؟
متى يفتح المصرف ؟	أميت بفتح البنك؟	متى يفتح البنك ؟
إجمالي المبلغ المطلوب مائتان وثلاثة وأربعون جنيه ، يا سيدتي .	المبلغ الكلي بطلع ميتين وثلاثة وأربيعين جنيه، يا مدام.	المبلغ الكلي يبلغ ميتين وثلاثة وأربيعين جنيهاً ، يا مدام.
لماذا لم يأت إلى الحفلة أمس ؟	ليش ما اجى على الحفلة امبارح؟	لماذا لا أذهب إلى الحفلة أمس ؟
أريد لفتان من ISO مائة ، فيلم ملون ، ستة وثلاثين لقطة ، من فضلك .	بدي لفتين أيزو مية، فلم ملون، ستة وثلاثين لقطة ، لو سمحت.	أريد لفتين أيزو مائة ، فلم ملون ، ستة وثلاثون لقطة ، من فضلك.
هل لديك مرآة ؟	عندك مراية؟	هل لديك بعض الماء ؟
هل من المقبول عدم اتباع أي شخص لتعليمات الأمن ؟	بصير حدا ما يتبع تعليمات الأمن؟	هل يمكن أن يتبع تعليمات الأمن ؟
علىّ أن ألحق بطائرة العاشرة صباحاً .	لازم ألحق طيارة الساعة عشرة الصبح.	يجب أن ألحق طائرة في العاشرة صباحاً.
من اين يمكنني الحصول على مسكوكة لركوب المترو ؟	من وين ممكن أجيب تذكرة لأركب المترو؟	من أين يمكنني الحصول على تذكرة لأركب المترو ؟
أين يمكنني تغير نقودي ؟	وين بقدر أصرف مصاريي؟	أين يمكنني أن أصرف ثمن ؟
هل بها جهاز تدفئة ؟	بيها جهاز تدفئة؟	هل بها جهاز تدفئة ؟
أريد بعض الكريم الليلي .	بدي كريم ليلي.	أريد كريم ليلي.
كم تتقاضى ثمنا لإرسالها لليابان ؟	قديش بدك توخذ عشان تبعثها على اليابان؟	كم تستغرق لكي ترسلها إلى اليابان ؟
أكيدا التي تتحدث معك ، أنا عندي حجز مائدة في تمام الساعة السادسة والثلث هذا المساء . ولكني آسفة لأني سأصل متأخرة نصف ساعة .	أكيدا يلي بتحكي. عندي حجز طاولة عالساعة ستة و ثلث المسا. بس آسفة لإني رح أوصل متأخرة نص ساعة.	حسناً. لدي حجز مائدة في الساعة السابعة وثلاثة مساءاً. ولكن آسف أنني سأصل متأخرة نصف ساعة.
متي سنستقل القارب ؟	متى بدنا نركب القارب؟	متى نقوم باستخدام القارب ؟
أرغب في غرفة بحمام .	بدي غرفة بحمام.	أريد غرفة بحمام.
معذرة , متي ينتهي هذا الفيلم ؟	عفواً, متى بخلص هذ الفلم؟	عفواً, متى ينتهي هذا الفيلم ؟
لقد تمكنت من تحقيق ذلك .	قدرت أوصل لهذا الشي.	لقد حاولت الوصول إلى هذا الشيء.
هل هو طريق طويل ؟	هو الطريق طويل؟	هل هو الطريق طويل ؟
ما هي الأنواع التي لديكم ؟	شو الأنواع اللي عندكم؟	ما الأنواع التي لديكم ؟
سأرتبك . هل تمانع في رسم خريطة لي ؟	رح أرتبك. ما عندك مشكلة ترسملي خريطة؟	سأرتبك. هل لديك مشكلة في ترسل لي خريطة ؟
لدينا جمبري رائع جداً اليوم .	عنا جمبري مميز كثير اليوم.	لدينا جمبري مميز جداً اليوم.
هل لديك أيّ خرائط بسيطة للمدينة ؟	عندي أي خرايط بسيطة للمدينة؟	هل لدي أي خرايط بسيطة للمدينة ؟
معذرة أريد الذهاب إلى فندقي في المدينة بالحافلة . أين يمكن أن أستقل حافلة ؟	عفواً، أنا بدي أروح على الفندق موجود بالمدينة بالباص. من وين بقدر آخذ باص؟	عفواً ، أنا أريد الذهاب إلى الفندق موجود في المدينة بالباص. من أين يمكنني الحصول على الحافلة ؟
شكراً . لكنني لا أعتقد أن عندي وقت للإقامة لمدة ليلتين . هل يمكنك حجز غرفة بسريرين لي في ذلك الفندق ليلة الثاني عشر من مارس فقط ؟	شكراً ، بس ما بتوقع أنه معي وقت عشان أظل ليلتين. ممكن تحجزلي غرفة مزدوجة في الفندق لليلة اثنعش ثلاث بس؟	شكراً ، ولكن لا أعتقد أن لدي وقت للقاء ليتين. هل لك أن تحجز لي غرفة مزدوجة في الفندق لليلة اثنعشر ثلاثة فقط ؟
بالتأكيد . كيف يمكننا خدمتك ؟	أكيد. كيف منقدر نخدمك؟	حسناً. كيف يمكن أن نقوم بعمل اتصالك ؟
شيكات سياحية . شكراً . خذ تذكرتك وبطاقة المرور للصعود على متن الطائرة . كن هناك قبل وقت الرحلة بساعة من فضلك .	شيكات سياحية. شكراً. أخذ تذكرتك و الفيزا عشان تطلع على الطيارة. كون هناك قبل الرحلة بساعة لو سمحت.	شيكات سياحية. شكراً. أخذ تذكرتك و الفيزا للذهاب. كون هناك قبل الرحلة في الساعة من فضلك.
أوافق . يجب أن تصبح طبيعية جداً .	أنا موافق. لازم تصير طبيعة كثير.	أنا موافق. يجب أن تكون طبيعة جداً.
أهذه عيادة إف ؟	هاي عيادة إف؟	هل هذه عيادة إف ؟
هل لك أن تغيرهم إلى دولارات من فضلك ؟	ممكن تحولي اياهم لدولارات، لو سمحت؟	هل يمكنك أن تحولي هذه إلى دولارات ، من فضلك ؟
حسناً . أراك الساعة الثانية يوم الأحد .	تمام . بشوفك الساعة ثنتين يوم الأحد.	حسناً. أراك في الساعة الثانية يوم الأحد.
هل يمكنك أن تشذب شاربي ؟	ممكن لو سمحت ترتبلي شواربي؟	هل يمكن أن ترتدي شواربي ؟
أود أن أصرف هذا الشيك بسبعين دولاراً .	بدي أصرف هاذ الشيك بقيمة سبعين دولر.	أريد أن أصرف هذا الشيك بقيمة سبعون دولاراً.
الجزء المكتوب بالطريقة المائلة يشير إلى التغييرات التي حدثت في التسعينات .	الجزء اللي مكتوب بالطريقة المايلة بدل على التغييرات اللي صارت بالتسعينات.	الجزء المكتوب بالطريقة المايلة بدل على التغييرات التي حدثت في التسعينات.
هل تشمل هذه الرحلة زيارة لبرج سيرز ؟	بتشمل هاي الرحلة زيارة لبرج سيرز؟	هل تشمل هذه الرحلة زيارة إلى برج سيرز ؟
أين ستنتهي الجولة ، ومتى ؟	وين راح تخلص الرحلة، و أميت؟	أين ستكون الرحلة ، أميت ؟
تفضل هذان دولاران . احتفظ بالباقي .	تفظل هي دولرين. خلي الباقي إلك.	تظل هي دولرين. خذ الباقي لك.
هل يوجد أي محل متعدد الأقسام قريب من هنا ؟	في أي مول قريب من هون؟	هل يوجد أي مول بالقرب من هنا ؟
هل ستزال تعمل جدول المواعيد ؟	هل رح تظل جدول المواعيد شغّالة؟	هل ستظل جدول المواعيد شغالة ؟
سوف آخذ هذه ، من فضلك .	راح آخذ هاظ ، لو سمحت.	سآخذ هذا ، من فضلك.
يقولون أن اليابان دولة غنية جداً .	بقولوا أنه اليابان بلد غني.	أقولون أن اليابان بلد غني.
ملعقتين , من فضلك .	معلقتين , لو سمحت.	معلقتين ، من فضلك.
أجل ، واحدة فقط . متى سأعرف ؟ وكيف سيتم تعويضي ؟	أها، بس وحدة؟ متى رح أعرف؟ وكيف رح يكون التعويض؟	نعم ، ولكن واحدة ؟ متى سأعرف ؟ وكيف سيكون التعويض ؟
هناك ، أمام بيانات السائح تماما .	هناك ، قدام بيانات السايح بالزبط .	هناك ، خلف بيانات الخاصة بي بالضبط.
أين أجد الاسطوانات المدمجة ؟	وين بلاقي السيديات؟	أين يمكنني أن أجد السيدات ؟
أنا متأثر للغاية , لا أستطيع البقاء ساكنا .	أنا متأثر كتير, ما قادر أضل ساكت.	أنا متأثر جداً, لا أستطيع أن أظل ساكتاً.
هل هو قريب لنصل إليه سيراً .	هو قريب عشان نوصلو مشي؟	هل هو قريب للذهاب ؟
إني من إسبانيا .	أنا من إسبانيا.	أنا من إسبانيا.
ـ أين أقرب محل جزارة ؟	وين أقرب لحام؟	أين أقرب لحام ؟
أود تأجير هذا الطراز من السيارات لمدة أربعة وعشرين ساعة .	بدي أستأجر هاذ الموديل من السيارات لمدة أربع وعشرين ساعة.	أريد استئجار هذا الموديل من السيارات لمدة أربع وعشرين دقيقة.
لا يمكن أن أبيع هذه دون روشتة .	ما بقدر أبيع هاي بدون وصفة طبية.	لا أستطيع أن أبيع هذه بدون وصفة طبية.
هل لديك صحف يابانية ؟	عندك جرايد يابانية؟	هل لديك أي جرايد يابانية ؟
هل هذا الحذاء متين ؟	هاذ البوط قوي؟	هل هذا البوط قوي ؟
لكنّي لدى موعد لرؤيتها في السّاعة الثّانية .	بس أنا عندي موعد عشان أشوفها الساعة ثنتين.	لكنني لدي موعد لمشاهدةها في الساعة الثانية.
هل لديك غرف أكبر ؟	عندك غرف أكبر؟	هل لديك غرف أكبر ؟
اعطني عامل التليفون من فضلك .	إعطيني عامل التلفون لو سمحت .	أعطني عامل الهاتف من فضلك.
ظننت أنكم أيها الشباب تأكلون الكعك المخبوز فقط .	فكرت إنكو يا شباب بتوكلوا الكعك المخبوز بس.	لقد فكرت أنكم يا شباب تناولوا الكعك المخبوز فقط.
أريد استئجار كرسي مركب .	بدي أستأجر كرسي اتمدد عليه.	أريد استئجار مقعد اتمدد عليه.
أنا أبحث عن شيء أنيق .	أني بدور على اشي لايق.	أنا أبحث عن شيء لايق.
حسناً . هل يجب أن أقوم بتركيزها ؟	ماشي. لازم أساويها مركزة؟	حسناً. هل يجب أن أساويها مركزة ؟
قهوة مع القشدة والسكر ، من فضلك .	قهوة مع القشطة والسكر، لو سمحت.	قهوة مع القشطة والسكر ، من فضلك.
سوف ننتظر . من فضلك اتصل بنا عندما تكون مستعداً .	رح نستنى . لو سمحت, إتصل فينا لما تكون جاهز.	سننتظر. من فضلك, تصل بنا عندما تكون جاهز.
فقط سياحة .	بس للسياحة.	إنها للسياحة.
أحتاج إلى طيب .	بدي دكتور.	أريد طبيباً.
إن الجونلات القصيرة ومعها الأحذية الطويلة لن تنقضي موضتها .	مش ممكن تخلص موضة التنانير القصيرة مع الجزم الطويلة.	لا يمكنك أن تحقق موضة التنانير القصيرة مع الجزم الطويلة.
ألا ترغب في فنجان شاي ؟	ما بدك تشرب كاسة شاي؟	هل تريد أن تشرب كاسة شاي ؟
ليس تماماً . فقط شيء ما غير غالي الثمن .	مش هيك. بس إشي مش غالي.	ليس كذلك. ولكن شيء لا يعمل.
إذا كنت تودّ ، بإمكاننا الاستراحة هنا .	إذا إنت حاب، ممكن نستريح هون.	إذا كنت بحاجة ، يمكننا أن نجلس هنا.
هل هذه كلها هي حقائبك ؟	هاي كلها شناتيك؟	هذه حقائبك.
هل تريد بالحلويات ؟	بدك حلويات؟	هل تريد حلويات ؟
نعم ، لكن ليس قويا جدا .	اه ، بس مش قوي كثير.	نعم ، لكنه ليس قوي جداً.
ويسكي وماء ، من فضلك . هل لديكم وجبة خفيفة معه ؟	ويسكي ومي، لو سمحت. عندكم سندويشة صغيرة او شيء خفيف معه؟	ويسكي ومي ، من فضلك. هل لديكم سندويشة صغيرة أم شيء خفيف معه ؟
أتعرف كاثي ؟ إنه عيد ميلادها .	بتعرف كاثي؟ هاي حفلة عيد ميلادها.	هل تعرف كاثي ؟ هذه حفلة عيد ميلادها.
أود تحميض هذا الفيلم . متي سيكون جاهزا ؟	بدي أحمض هالفلم. متى رح يكون جاهز؟	أريد أن أحمض هذا الفيلم. متى سيكون جاهز ؟
تشغل أشخاصاً جدد في أبريل .	رح توظف ناس جداد في نيسان.	سيتم توقيع بعض الناس في نيسان.
سأكون سعيدا بذلك . متى ترغب في ذلك ؟	رح اكون مبسوط لهالشي. متى بدك ياه؟	سأكون مبسوط لهذا. متى تريد ذلك ؟
رائع .	بجنن.	جميل.
من فضلك اتجه يساراً عند التقاطع التالي .	لو سمحت روح عاليسار بالتقاطع الجاي.	من فضلك اتجه إلى اليسار في التقاطع القادم.
هلا أريتني بعض الفساتين ؟	ممكن توريني شوي من الفساطين؟	هل يمكنك أن تريني بعضاً من الفساطين ؟
أين المقهى ؟	وين الكوفي شوب ؟	أين الكوفي شوب ؟
لا يمكنك جلب الألعاب النارية إلى كندا .	ما بتقدر تجيب ألعاب نارية على كندا.	لا يمكنك أن تحضر ألعاب نارية إلى كندا.
اعتقد أن هذا عالي قليلا بالنسبة لي .	بتوقع أنه شوي عالي بالنسبة الي.	أعتقد أنه يبدو على ما يرام.
لم يعد بإمكانك حقيقةً أن تقوم بعمل تصميم دون كمبيوتر بعد الآن .	بطلت تقدر تعمل تصميم بدون كمبيوتر من هون و طالع.	هلا أستطيع عمل تصميم بدون كمبيوتر من هنا وأنت ذاهب ؟
أريد اسطوانة مدمجة .	بدي سي دي.	أريد سي دي.
هل يمكنني حجز غرفة بسريرين تطل على المحيط ؟	بصير أحجز غرفة بتختين بطل على البحر؟	هل يمكنني حجز غرفة بتختين بطل إلى البحر ؟
مايومي , هل تسمح أن تملأ هذه الورقة بتوقيعك ؟	مايومي، ممكن تعبيي هاي الورقة بتوقيعك؟	مايومي ، هل يمكن أن أتعبي هذه الورقة في بطاقة التوقيعك ؟
هلا أرشدتني إلى مطعم مفضل بين الشبان ؟	ممكن ادلني على مطعم معروف بين الشباب؟	هل يمكن أن أدعوني إلى مطعم معروف بين الشباب ؟
حجزنا مقعداً ليوم الخامس والعشرين من أكتوبر في الساعة الحادية عشر صباحاً .	حجزنا مقعد لخمسة و عشرين من شهر عشرة الساعة احدعش الصبح.	حجزنا مقعداً لمدة خمس وعشرين من أكتوبر.
إن الناس ودودون جداً .	الناس حابيين كثير.	الناس باهظون جداً.
متى يتعين علي أن أكون في المحطة ؟	أي وقت لازم أكون بالمحطة؟	أي وقت يجب أن أكون في المحطة ؟
ليس هذا صحيحاً . أنت دائما تعاملني .	هاظ مش صحيح . إنت دايما بتعاملني.	هذا ليس صحيحاً. إنك دائما تعاملني.
ما نوع العصير الذي تفضله ؟	شو نوع العصير اللي بتحبه ؟	ما نوع العصير الذي تحب ؟
هل لي في بعض الفلفل ؟	ممكن أخذ شوي فلفل؟	هل يمكنني أن أخذ بعض الفلفل ؟
احتاج إلى بعض الهدايا التذكارية من نيويورك .	أنا بدي شوية هدايا تذكارية من نيويورك.	أنا أريد بعض هدايا تذكارية من نيويورك.
اسمي " تارو تاناكا " لدي حجز مسبق .	اسمي " تارو تاناكا " عندي حجز من قبل.	اسمي " تارو تاناكا " لدي حجز من قبل.
إنها الثالثة والربع .	الساعة ثلاثة وربع.	الساعة الثالثة وربع.
كم التكلفة كلها ؟	قديش الكلفة كلها؟	كم إجمالي التكلفة كلها ؟
لا أدري كم من النقود يجب علىّ تركه كبقشيش ؟	ما بعرف قديش لازم أترك بغشيش.	لا أعرف كم يجب أن أترك في الغشيش.
سآخذ شيكولاتة ساخنة .	بدي آخذ هوت شوكليت.	أريد أن آخذ هوت شوكليت.
ماذا تنوي أن تفعل عقب الانتهاء من المدرسة . ؟	شو بتخطط تعمل بعد ما تخلص مدرسة؟	ماذا تخطط أن تفعل بعد أن تخلص مدرسة ؟
أشعر بالغثيان .	بحس حالي بدي أتقيء.	أشعر بألم في الحال.
ماذا ؟ هل عليك دفع ضرائب عندما يكون لديك أكثر من ثلاثة زجاجات كحول ؟	شو؟ عليك ضرايب بس يكون عندك أكثر من ثلاث قناني كحول؟	ماذا ؟ هل لديك أكثر من ثلاثة زجاجة كحول ؟
لقد حصلت على بطارية فارغة .	بطاريتي صارت فاضية.	لقد أصبت بطاريتي فاضية.
معذرة . أنا طالب جامعي من اليابان . هل أنتم طلاب في جامعة نيويورك ؟	معلش، أنا طالب جامعي من اليابان. إنتوا طلاب بجامعة نيو يورك؟	معذرة ، أنا طالب جامعي من اليابان. هل أنت طلاب في جامعة نيويورك ؟
من الذي يعزف ؟	مين اللي عم يعزف؟	من يعزف ؟
معطف رائع . هل هو صناعة بريطانية ؟	جاكيت حلو. هاد صنع بريطاني؟	جاكيت جميل. هل هذا صنع بريطاني ؟
هل لديكم فيلم شفاف ملون ؟	عندك فلم شفاف ملون؟	هل لديك فلم شفاف ملون ؟
أين قسم السيدات ؟	وين قسم النسوان؟	أين قسم النسوان ؟
جميل الفستان التي ترتدينه .	حلو الفسطان اللي لابسيته.	جميل الفسطان الذي ألبسته.
تموج شعر دائم مشدود من فضلك .	كيرلي عطول مشدود، لو سمحت.	خذني على طول مشدود ، من فضلك.
هل لدينا وقت كاف لإنهاء إجراءات المغادرة ؟	معنا وقت كافي لنخلص إجراءات المغادرة؟	هل لدينا وقتاً كافياً لتحقيق إجراءات المغادرة ؟
هل هناك جولة بالحافلة تجوب المدينة ؟	في دورة بالباص نلف بالبلد؟	هل هناك دورة في الحافلة نلف في المدينة ؟
هل أستطيع الحصول على تذكرة متعددة الاستخدام ؟	ممكن أوخذ بطاقة ذكية؟	هل يمكنني الحصول على بطاقة ذكية ؟
كان فيلم " حرب الكواكب " أكثر الأعمال شعبية عام ألف وتسعمائة وأربعة وثمانون .	كان فيلم "حرب الكواكب" من أشهر الأفلام سنة ألف وتسعمائة وأربعة وثمانون.	كان فيلم " حرب الكواكب " من أشهر الأفلام عام ألف وتسعمائة وأربعة وثمانون.
أوه ، يجب أن تخطر القنصلية على الفور .	أوه، لازم تبلغ القنصلية هسا.	أوه ، عليك أن تبلغ القنصلية الآن.
هل يوجد ملهى ليلي جيد به عرض رقصة الفلامنكو ؟	في نايت كلوب رايق عنده رقصة الفلامنكو؟	هل يوجد نايت كلوب رايق على رقصة الفلامنكو ؟
لماذا لم تقلع الرحلة ؟ أخبرني عما يجري .	ليش ما طلعت الرحلة؟ قلي شو بصير.	لماذا لم يخرج الرحلة ؟ أخبرني ماذا سيحدث.
سأصبح بديناً في حال ما ظللت جالساً هنا آكل باستمرار .	رح أصير ناصح لو استمريت قاعد هون آكل دايما.	سأكون ناصح لو استمرت هنا الإقامة.
هل على السيدات ارتداء فستان سهرة ؟	لازم الستات يلبسن فسطان سهرة؟	هل يجب أن يلبس الستات فسطان سهرة ؟
حسنا إذاً ، أريد عصا مضرب أصغر كتلك التي مع جوليا روبرتس .	ماشي يعني، بدي عصاة مضرب اصغر مثل اللي مع جوليا روبرتس.	حسناً ، أريد عصاة مضرب أصغر مثل جوليا روبرتس.
أريد أن اتصل هاتفياً بالسفارة اليابانية .	بدي أحكي بالتلفون مع السفارة اليابانية.	أريد أن أتصل بالتلفون مع السفارة اليابانية.
هل هذه السجائر معتدلة ؟	هاي السقاير معتدلة؟	هل هذه السقاير معتدلة ؟
هل هذا طلب شخص آخر .	هاظا طلب واحد ثاني؟	هل هذا طلب واحد آخر ؟
في حالة إمكان ذلك , احجز منضدة بالقرب من النافذة من فضلك .	لو في امكانية, احجزلي طاولة عند الشباك لو سمحت.	من فضلك, احجز لي مائدة عند النافذة من فضلك.
هل يمكن أن نحجز طاولة لخمسة أشخاص ؟	ممكن نحجز طاولة لخمس أشخاص؟	هل يمكن أن نحجز مائدة لخمسة أشخاص ؟
شركة الخطوط الجوية اليابانية ، طائرة رقم واحد اثنان ثلاثة .	شركة الخطوط الجوية اليابانية، رحلة الطيران رقم واحد اثنين ثلاثة.	شركة الخطوط الجوية اليابانية ، رحلة الطيران رقم واحد اثنان ثلاثة.
من فضلك اتصل بي في الفندق عندما تجد حقائبي .	من فضلك، كلمني بالفندق لما تلاقي شنطي.	من فضلك ، كلمني في الفندق عندما تجد حقائبي.
ذلك الحد الأدنى للسعر .	هيك أقل سعر.	إنه أقل سعر.
أنت محظوظ .	إنت محظوظ.	أنت محظوظ.
هل سيكون هذا المتجر مفتوحاً غداً ؟	راح يكون هاظ المحل فاتح بكرا؟	هل سيكون هذا المحل فاتح غداً ؟
وصلت الفاتورة لمائة دولار .	وصلت الفاتورة لمية دولار.	وصلت الفاتورة لمئة دولار.
هل هذا مكتب الاستقبال ؟ هل يوجد عيادة قريبة ؟	هاظ مكتب الاستقبال؟ في عيادة قريبة من هون؟	هل هذا مكتب الاستقبال ؟ هل يوجد عيادة بالقرب من هنا ؟
كم عمر ابنتك ؟	قديش عمر بنتك؟	كم عمر بنتك ؟
لن ينضم للجولة الاختيارية إلا القليل من الناس .	ما رح ينضم للجولة الاختيارية غير شوي من الناس.	لا ينضم للجولة الاختيارية كثيراً من الناس.
إنها مجرد هدية تعبيرا عن تقديري .	هاي مجرد هدية تعبير عن تقديري.	هذه مجرد هدية تعبير عن تقديري.
تحتاج لرؤية أخصائي .	بتحتاج تشوف دكتور متخصص.	أتمنى أن ترى طبيباً متخصصاً.
كم تكلّف هي لكل جالون ؟	كم سعر الغلون الواحد؟	كم سعر الغلون الواحد ؟
أيمكنني الحصول على جدول زمني ، من فضلك ؟	ممكن أحصل على جدول الوقت، لو سمحت؟	هل يمكنني الحصول على جدول الوقت ، من فضلك ؟
لقد سُرقت حقيبتي .	انسرقت شنتتي.	لقد سرقت حقيبتي.
نستخدم الأعواد عندما نأكل .	بنستعمل العيدان لما بنوكل.	نستخدم العيدان عندما نأكل.
حسناً ، في حالة إصرار كليكما , سأذهب معكما .	طيب، اذا انتو الاثنين مصرين، أني راح اروح معكو.	حسناً ، إذا كنت الاثنين مصرين ، أنا سأذهب معكم.
في أي محطة سأنزل للذهاب إلى مبنى إمباير ستيت ؟	بأي موقف لازم انزل عشان أروح على عمارة امباير ستيت؟	في أي موقف يجب أن أزل لأذهب إلى عمارة امباير ستيت ؟
لابد أن تأخذها تسعة وتسعون مرة في اليوم ، قبل الوجبات .	لازم تاخذها تسعة وتسعين مرة باليوم، قبل الأكل.	يجب أن تأخذها تسعة وتسعين مرة في اليوم ، قبل الطعام.
لا يا سيدي . هذه الظهيرة محجوزة بالكامل . ومع ذلك يمكن أن تحجز غدا .	لا، يا أستاذ، اليوم بعد الظهر كله محجوز. لكن بتقدر تحجز بكرا .	لا ، يا سيدي ، اليوم بعد الظهر محجوز. لكن يمكنك أن تحجز غداً.
هل هناك طبيب للفندق أو واحد على صلة بالفندق .	في دكتور للفندق أو واحد ع علاقة بالفندق؟	هل يوجد طبيب للفندق أو طبيب للفندق ؟
المياه الساخنة ليست ساخنة بالقدر الكافي .	المية الحامية مش حامية بشكل كافي.	المياه الحامية لا تبدو باهظة الثمن.
هل استرحت في نومك ؟	ارتحت بالنومة؟	هل ترى بعض الملابس ؟
أريد إعادة المال . هل يمكن أن أحصل على مالي ؟	بدي أرجع المصاري. بقدر أوخذ مصرياتي؟	أريد أن أعيد المصاري. هل يمكنني أن أخذ مصرياتي ؟
انها باتجاه الجنوب .	هي باتجاه الجنوب.	إنها في الاتجاه الجنوب.
ما سعر تذكرة درجة أولى إلى إدنبره , من فضلك ؟	كم سعر تذكرة درجة أولى لإدنبره , إذا تكرمت.	كم سعر تذكرة درجة أولى إلى أدنبرة, من فضلك.
عندي قشعريرة .	عندي قشعيرية.	لدي قشعيرية.
لماذا , شكرا جزيلا . هل أستطيع الارتقاء للقمة ؟	ليش، شكراً كثير الك. بقدر اطلع للقمة؟	لماذا ، شكراً جزيلاً لك. هل يمكنني الدخول للقمة ؟
لا . هل تحب الإبلاغ عنه ؟	لا . بدك تبلغ عنو ؟	لا. هل تريد أن تبلغ عنهم ؟
من فضلك غير هذه الينات إلى جنيهات .	لو سمحت اصرفلي هظول من ين لقنيه.	من فضلك اصرف هذا من ين لقنيه.
سآخذ مقاعد درجة رجال أعمال ، أليس كذلك ؟	راح آخد مقاعد درجة رجال الأعمال، صح؟	سآخذ مقاعد درجة رجال الأعمال ، أليس كذلك ؟
لا أستطيع أن أفعل ذلك , لكني سوف أضعها في الحقيبة لك .	ما بقدر اعمل هيك , بس رح احطها بالشنتة الك .	لا أستطيع فعل ذلك, ولكن سأضعها في الحقيبة لك.
إنه غالي الثمن إلى حد ما . ألا يمكنك منحي خصماً ؟	هاد كثير غالي. ما فيك تعطيني شوية خصم؟	هذا جيد جداً. هل لك أن تعطني بعض الخصم ؟
إن " السنة " متقلقلة .	ال"سنة" عم تتقلب.	السنة " تتقلب.
سيكون جاهزا بعد غد في المساء .	راح يكون جاهز بعد بكرا المسا.	سيكون جاهز بعد غد مساءاً.
هل ليدكم صناديق لإرسال الطرود ؟	عندكم علب لارسال الطرود ؟	هل لديكم علب لارسال الطرود ؟
إن عثرت على شيء ، اتصل بي من فضلك .	لو لقيت إشي، رنلي إذا تكرمت.	من فضلك ، اتصل بي إذا تكرمت.
أود تقصيره ببوصة واحدة من هذه المنطقة .	بدي اقصّره بوسطة وحدة من هادي المنطقة.	أريد أن أقصره بوسطة واحدة من هذه المنطقة.
هل لديكم أي خبز ؟	عندكم خبز؟	هل لديكم خبز ؟
أود بعض البيجامات .	بدي بيجامات.	أريد بيجامات.
أين يمكنني طباعة الفيلم ؟	وين بقدر أطبع الفلم؟	أين يمكنني أن أطبع الفيلم ؟
أيمكنك الحضور إلى هنا لإصلاحه ؟	ممكن تيجي هون عشان اتصلحه؟	هل يمكنك أن تأتي إلى هنا لتصلحه ؟
أين يمكنني أن أستقل حافلة لمشاهدة المعالم ؟	من وين ممكن اركب باص لحتى اتفرج ع المعالم؟	من أين يمكنني ركوب الحافلة للذهاب إلى المعالم ؟
مرحبا يا سيدة ياماجوتشي ؟ فريقك على الخط . قبلت دعوتك . استمر من فضلك .	أهلا وسهلا يا سيدة ياماجوتشي، فريقك عم يكلمك. رديت على دعوتك. استمري، من فضلك.	أهلاً يا سيدة ياماجوتشي ، فريقك يؤلمك. لقد اتصلت بك. استمر ، من فضلك.
هل لك أن تساعدني في الوصول إلى حقيبتي ؟	ممكن تساعدني ألاقي شنتيتي؟	هل يمكنك أن تساعدني في الحصول على حقيبتي ؟
آسف لقد نفذ هذا الصنف لدينا .	معذرة، هاد النوع خلص عنا.	معذرة ، هذا النوع انتهى لنا.
ما اسم الشخص الذي تود التحدث إليه ؟	شو اسم الشخص اللي بدك تحكي معه؟	ما اسم الشخص الذي تريد أن تقول معه ؟
لقد اجتزت هذا الاختبار بنجاح كبير .	عديت الامتحان بنجاح كبير .	لقد انتهيت من الامتحان بجوار جيد.
طبقاً لتقرير الطقس ، فإن غداً سيشهد سقوط جليد .	بناءً على النشرة الجوية، راح تثلج بكرا.	طبقاً على النشرة الجوية ، سيتم التزلج غداً.
لا أستطيع ضبط اللوحة .	مش قادر أزبط الصورة.	لا أستطيع أن أضع الصورة.
لا زالت غالية جدا . هل من الممكن أن آخذها بثلاثة دولارات ؟	بعدها غالية كثير. ممكن أشتريها بـثلث دولارات؟	بعدها غالية جداً. هل يمكنني شراءها بـثلاثة دولارات ؟
نريد اثنين هامبورجر واثنين قهوة ، من فضلك ، نريد تناولها خارج المحل .	بدنا زوج همبرجر وزوج قهوة، لو سمحت، بدنا ناكلها برة المحل.	نريد زوج همبرجر وزوج قهوة ، من فضلك ، نريد أن نأكلها في غرفة المحل.
زدني قليلاً .	زيدني شوي.	لقد زيدني قليلاً.
هل لي بشوكة أخرى ؟	بدي شوكة ثانية؟	هل أريد شوكة أخرى ؟
أنا هنا في مهمة إعلامية .	أنا هون بشغل إعلامي.	أنا هنا لعمل إعلامي.
إنها ليست أحدث طراز ، أليس كذلك ؟	هاي مش أحدث موديل ، صح؟	هذه ليست أحدث موديل ، أليس كذلك ؟
أبغي بعض الأقراص المنومة .	بدي حبوب منوم.	أريد حبوب منوم.
أي حافلة تذهب إلى وسط المدينة ؟	أي باص رايح عالدوار الرئيسي؟	أي الحافلة يذهب إلى الدوار الرئيسي ؟
أريد الذهاب إلى مركز هارفارد . هل يمكن أن تخبرني عندما نصل إلى هناك ؟	بدي اروح على مركز هارفارد. ممكن تقلي لما نوصل هناك؟	أريد الذهاب إلى مركز هارفارد. هل يمكنك أن تخبرني عندما نصل إلى هناك ؟
أريد أن أحجز على شركة نورث وست إيرلينز على الرحلة رقم صفر ثمانية ستة في الخامس .	بدي احجز على شركة نورث وست إيرلينز على الرحلة رقم صفر ثمانية ستة بخمسة الشهر.	أريد الحجز على شركة نورث وست إيرلينز على الرحلة رقم صفر ثمانية ستة في الخامس من مارس.
لقد استمتعت بالوجبة كثيراً جداً .	كثير استمتعت بالوجبة.	لقد استمتعت بالوجبة.
سيكون هناك تأخير بسيط .	راح يكون في تأخير بسيط.	سيكون هناك تأخير بسيط.
فقط إذا كانت ملكك ، سيدي . هاها ، مزحة صغيرة .	بس اذا كانت ملكك ، يا سيدي . ههههههه، هاي مزحة صغيرة.	لكن إذا كان ملكك ، يا سيدي. هذه مزحة صغيرة.
نستطيع أن نرتب لتنظيف غرفاتكم .	ممكن نرتب معك عشان تنظيف غرفكم.	هل يمكننا أن نرتب معك لتنظيف غرفكم ؟
وما هي المثانة ؟	وشو هي المثانة ؟	ما هي المثانة ؟
لا أستطيع النوم جيداً أثناء الليل .	ما قدرت أنام مليح بالليل.	لا أستطيع أن أجلس جيداً في الليلة.
ما هو مستوى مهارتك في عزف الكمان ؟	شو مستواك بعزف الكمان؟	ما مستواك بعزف الكمان ؟
ما هي أكثر الأشياء التي تثير اهتمامك الآن ؟	شو أكثر الأشياء اللي بتلفت انتباهك هسا ؟	ما هي أكثر الأشياء التي تلفت انتباهك الآن ؟
اجعل قصة الشعر تتدلى لأسفل , من فضلك .	خلي قصة الشعر تنزل لتحت، لو سمحت.	خذ قصة الشعر على الجانب ، من فضلك.
هل لك أن تستدعي لي سيارة أجرة الساعة الثامنة صباح غد ؟	ممكن تجيبلي تكسي بكرا الساعة ثمنية الصبح؟	هل لك أن تحضر لي سيارة أجرة في الثامنة صباحاً ؟
هلا ملأت هذا النموذج ؟	ممكن تعبي هاذ النموذج؟	هل يمكنك أن تعبي هذا النموذج ؟
أيمكنك الانتهاء من ذلك بعد عشر دقائق ؟	بتقدر تخلص هاي بعد عشر دقايق؟	هل يمكنك أن تقوم بذلك بعد عشر دقائق ؟
الملح من فضلك .	الملح لو سمحت.	الملح من فضلك.
لقد نمت و لم أتيقظ حين رن منبه السادسة و النصف .	نمت و ما صحيت ع منبه الساعة ستة ونص.	لقد نمت و لم أصل إلى منبه في الساعة السابعة والنصف.
نحن من أكبر موردي أجهزة الميكروكومبيوتر .	إحنا من أكبر موردين لأجهزة الميكرو كمبيوتر .	نحن من أكبر موردين لأجهزة الميكرو كمبيوتر.
من فضلك أخبرني كيف أملأ بطاقة النزول إلى البر ؟	لو سمحت قلي كيف أعبي بطاقة النزول للبر؟	من فضلك أخبرني كيف أستخدم بطاقة النزول للبر ؟
دجاج محمر ، من فضلك .	دجاج مشوي، لو سمحت.	دجاج مشوي ، من فضلك.
أجل ، ولكن هذا كثير جدا ، ولقد شبعت بالفعل .	أيوة، بس هاي كتير كثير ، وأنا صرت أكلت كفاية.	نعم ، لكن هذه كثيرة جداً ، وأنا لقد أكلت كثيراً.
لقد أُغلق علي الباب . هل يمكن أن تفتح بابي , من فضلك ؟	ييي تسكر علي الباب . بتقدر تفتحلي الباب، لو سمحت؟	يبدو أن تفتح الباب. هل يمكنك أن تفتح الباب ، من فضلك ؟
بكل تأكيد . سنكون سعداء لفعل هذا .	أكيد. راح نكون مبسوطين نعمل هيك.	بالتأكيد. سنكون سعداء لفعل ذلك.
يقولون إن الأنفلونزا منتشرة هناك .	بيقولوا انو الإنفلونزا معمية هنيك.	أقولون أن الإنفلونزا معمية هناك.
هل ستدفع شركة الطيران رسوم الفندق والوجبات ؟	رح تدفع شركة الطيران رسوم الفندق والوجبات؟	هل ستدفع شركة الطيران رسوم الفندق والوجبات ؟
نسيت تذكرة الطيران الخاصة بي في الفندق .	نسيت تذكرة الطيارة قيتي بالفندق.	لقد نسيت تذكرة طائرة قيتي في الفندق.
هل يمكن أن احصل على احدى المجلات أو شيئ من هذا القبيل ؟	ممكن أوخذ وحدة من المجلات أو شي زي هيك؟	هل يمكنني أن آخذ واحدة من المجلات أو شيء كذلك ؟
تناسبني تماما .	مناسبيتني كثير.	لقد كانت مناسبة جداً.
خذني إلى المستشفى .	خذني على المستشفى.	خذني إلى المستشفى.
ربما كان يعاني سّدَّة تنفسية .	ممكن عنده صعوبة بالتنفس.	هل يمكن أن يواجهه صعوبة في التنفس.
كم تكلفة الذهاب إلى فندق سي ؟	قديش بتكلف الروحة لفندق سي؟	كم تتكلف الذهاب إلى فندق سي ؟
هل هناك أي غرف خالية في عربة النوم ؟	ظل في أي غرف فاظية بعرباية النوم؟	هل ظلت أي غرف مفتوحة في عربة النوم ؟
هل يوجد بوتيك قريب من هنا ؟	في بوتيك قريب من هون؟	هل يوجد بوتيك بالقرب من هنا ؟
عندما أرى الأسعار بهذا الرخص ، يبدو الأمر سخيفاً أن أشتري أي شيء في اليابان .	لما أشوف الأسعار بهالرخص ، بحس أنه مسخرة الواحد يشتري أي شي باليابان.	عند رؤية الأسعار به الرخص ، أشعر أنها مسخرة أحد شراء أي شيء في اليابان.
لم يخرج من الماكينة شيء .	ما طلع من الماكينة إشي.	لا يخرج من الماكينة شيء.
كم كان ثمنها ؟	قديش كان حقها ؟	كم كان ثمنها ؟
أريد هدية بمناسبة الذكرى السنوية .	بدي هدية لمناسبة الذكرى السنوية.	أريد هدية لمناسبة الذكرى السنوية.
علي أن ألحق طائرة متجهة للوس أنجليس باكر صباح غد .	لازم ألحق طيارة لوس أنجلوس بكرا الصبح بكير.	يجب أن ألحق طائرة لوس أنجلوس غداً صباحاً.
يا صاح , أتعرف أي مكان يستحق الرؤية قريبا من هنا ؟	أخوي، بتعرف أي مكان محرز الشوفة قريب من هون؟	أخشى ، هل تعرف أي مكان محرز الشوفة بالقرب من هنا ؟
عندي الكثير من الوقت .	عندي وايد وقت.	لدي كثير من الوقت.
من أين يمكنني شراء بعض الهدايا التذكارية ؟	منين بقدر أشتري شوية هدايا تذكارية ؟	من أين يمكنني شراء بعض هدايا تذكارية ؟
أنظر إلى هذا . انظر إلى هذا . سوف تخبرني أن الاختلاف بين هذا الشاب وذلك الشاب هو الحظ ؟ محمد ، يقف بالسيارة في جانب الطريق ، وأنت ؟ لن تمانع في أن أنام معك هنا . أنا متأخر . كان لقاء جميل معك ؟	شوف هاظ. شوف هاظ. راح تحكيلي انو الفرق بين هالشب وهذاك الشب هو الحظ؟ محمد، واقف بالسيارة على زقاق الشارع، وإنت؟ ما راح تعترض اذا قعدت معك هون. انا تأخرت. كان لقاء حلو معك؟	شاهد هذا. شاهد هذا. هل ستخبرني أن الفرق بين هذا الشب وهذا الشب هو الحظ ؟
أعمل في شركة تجارية .	أني بشتغل بشركة تجارية.	أنا أعمل في شركة تجارية.
أفهم ، لكن لا أستطيع أن أقولها .	فاهم، بس بقدر أقولها.	أفهم ، ولكنني أستطيع أن أقولها.
نصف زجاجة , من فضلك .	نص قنينة ، لو سمحت.	نصف زجاجة ، من فضلك.
متى تقام مباراة كرة القدم ؟	متى بتبلش مباراة كرة القدم؟	متى تبدأ مباراة كرة القدم ؟
ما هو متوسط أسعاركم للفاكس الدولي كل شهر ؟	كم معدل تكلفة الفاكس الدولي كل شهر؟	كم معدل تكلفة الفاكس الدولي كل شهر ؟
انتظر دقيقة من فضلك .	استنى دقيقة لو سمحت.	استمر دقيقة من فضلك.
هل هو محجوز بالكامل ؟	هو محجوز كله؟	هل هو محجوز كله ؟
شيء خطأ مع حقيبتك .	اشي غلط بشنتك .	هذا خطأ في حقيبتك.
كلا منا يريد أن يحاسب على وجبته .	إحنا كل واحد بدو يدفع عن أكلته.	نحن كل واحد يدفع عن وجبة غذائية.
ألم تتلق الاستمارة بالطائرة ؟	ما أخذت الاستمارة بالطيارة؟	هل أخذت الاستمارة بالطائرة ؟
هل لديك أي شيء لفترة أطول قليلاً ؟	عندك أي اشي لوقت أطول شوي؟	هل لديك أي شيء لوقت أطول قليلاً ؟
أجل ، من فضلك أرسله إلى الغرفة اثنا عشر أربعة وثلاثون .	أيوه، لو سمحت وديه على الغرفة اثنعش أربعة وثلاثين.	نعم ، من فضلك ضعه على الغرفة اثنان أربعة وثلاثون.
أين البحيرة ؟	وين البحيرة؟	أين البحيرة ؟
هل هناك حافلة تذهب مباشرة إلى هناك ؟	في أي باص بروح هناك مباشرة؟	هل توجد أي أتوبيس يذهب إلى هناك مباشرة ؟
أريد هذا الطراز لخمسة أماكن مرصعة .	بدي هاي النوعية لخمس أماكن مرصعة.	أريد هذه النوعية إلى خمسة أماكن مرصعة.
هل لك أن تغلف هذه كالهدية ؟	ممكن تلفلي هاي كهدية؟	هل يمكن أن تتلف هذه كهدية ؟
نعم لدينا هذا ، سوف نجهزها لك .	اه موجود عنا. رح نجهزلك اياه.	نعم ، لدينا. سنهز لك ذلك.
هل يمكنك تبديل هذه بواحدة جديدة ؟	ممكن تبدلي هاي بوحدة جديدة؟	هل يمكن أن تبادل هذه بوحدة جديدة ؟
عفواً . ستكون جاهزة في غضون خمس دقائق .	عفوا. رح تكون جاهزة خلال خمس دقايق.	عفواً. ستكون جاهزة خلال خمسة دقائق.
أين يمكنني أن أشتري إبريقاً ؟	من وين بقدر اشتري بريق؟	من أين يمكنني شراء بريق ؟
أعتقد أن عمره أكثر من خمسين سنة .	بتوقع عمره اكثر من خمسين سنة.	أعتقد أن عمره أكثر من خمسين عاماً.
أود أن أطلب , من فضلك .	بدي أطلب , بعد إذنك.	أريد أن أطلب, من فضلك.
معذرة . كيف يمكنني الوصول إلى المصرف ؟	معلش، كيف بقدر أوصل للبنك؟	معذرة ، كيف يمكنني الوصول إلى البنك ؟
لدي بعض الملابس للمغسلة .	عندي شوية وعية للغسيل.	لدي بعض الوعاء للغسيل.
كريمة وسكر ؟	كريمة وسكر؟	هل كريمة وسكر ؟
هل يوجد أي قطار سريع إلى بوسطن ؟	في أي قطار سريع لبوسطن؟	هل يوجد أي قطار سريع إلى بوسطن ؟
الحجوزات في السابعة ، تحت اسم مانو .	حجوزات الساعة سبعة، بإسم مانو.	حجوزات الساعة السابعة ، بإسم مانو.
أين أفضل مكان لمشاهدة المعالم ؟	وين أحسن مكان لشوفة المناظر؟	أين أفضل مكان لمشاهدة المناظر ؟
هل يمكنك أن تريني كيف أضع الغاز ؟	ممكن توريني كيف أحط الغاز؟	هل يمكنك أن تريني كيف أضع الغاز ؟
علىّ أن أذهب ، سأتصل بك لاحقاً .	أني لازم أروح. رح أحكي معك بعدين.	أنا علي أن أذهب. سأخبرك بعد ذلك.
لا كهرباء .	ما في كهربا.	لا يوجد كهربا.
ثلاثون دولاراً وثمانون سنتا .	ثلاثين دولار وثمانين سنت.	ثلاثون دولاراً وثمانون سنتاً.
هل تعرف طبيب أسنان جيد ؟	بتعرف دكتور اسنان كويس؟	هل تعرف طبيب أسنان جيداً ؟
هل من الممكن أن أمكث في غرفتي حتى الثانية مساءً ؟	ممكن أظل بغرفتي للساعة ثنتين المسا؟	هل يمكنني أن أقيم في غرفتي حتى الساعة الثانية مساءاً ؟
إن حول غرفتي ضجيجا بالغا .	في ضجة كبيرة حوال غرفتي	إنها ضجة كبيرة حول غرفتي.
كم ستستغرق لكي تطلب ؟	قديش بدك يعني عشان تطلب؟	كم يمكنني أن أطلب ؟
معدتي تؤلمني بعد الوجبات .	معدتي بتالمني بعد الوجبات.	لقد ألم معدتي بعد الوجبات.
نفضل مائدة بجوار النافذة .	بنحب طاولة جنب الشباك.	أفضل مائدة بجوار النافذة.
كنت على رحلة يونيتد إيرلاينز رقم ثمانية اثنان ثمانية .	كنت برحلة يونايتد إيرلاينز الرقم ثمانية اثنين ثمانية.	كنت في رحلة يونايتد إيرلاينز الرقم ثمانية اثنان ثمانية.
هل لك أن ترسم لي خريطة , من فضلك ؟	ممكن ترسملي خريطة، لو سمحت؟	هل يمكن أن ترسل لي خريطة ، من فضلك ؟
هل بإمكاني اللمس ؟	بقدر ألمسه؟	هل يمكن أن ألمسه ؟
يصعب العثور على هذا المكان . إنه في طريق ضيق يتفرع من الطريق الرئيسي .	صعب يلتقى هالمكان. هو بدخلة بتتفرع من الشارع الرئيسي.	صعباً أن يقابل هذا المكان. إنه دخلة تتفرع من الشارع الرئيسي.
هلا أخذت هذه السراويل ؟	ممكن توخذ هاي البنطلونات؟	هل يمكنك أن تأخذ هذه البنطلونات ؟
حسنا . إنها تتكلف خمسة وثمانون دولارا في البريد العادي وثلاثة دولارات في التوصيل الخاص .	طيب. بتكلف خمسة وثمانين دولر بالبريد العادي وثلاث دولرات بالتوصيل الخاص.	حسناً. تتكلف خمسة وثمانون دولاراً بالبريد العادي وثلاثة دولرات بالتوصيل الخاص.
إذاً يمكنني بكل ثقة أن أزكي برج مدينة سان فرانسيسكو . فهذا يعطيك فكره عن سان فرانسيسكو .	يعني بنصحك عالأكيد ب برج مدينة سان فراسيسكو. رح يعطيك لمحة عن سان فرانسيسكو.	أعتقد أننا نصل لك على أكيد في برج سان فراسيسكو. سيعطيك لمحة عن سان فرانسيسكو.
لدي تقدير كبير للموسيقى الكلاسيكية .	كثير بقدر الموسيقى الكلاسيكية.	كثيراً يمكنني الموسيقى الكلاسيكية.
من فضلك استعمل غرفة القياس هناك .	من فضلك استخدم غرفة القياس هنيك.	من فضلك استخدم غرفة القياس هناك.
سر في نفس الاتجاه حوالي خمس دقائق ثم لف لجهة اليسار .	امشي بنفس الاتجاه حوالي خمس دقايق و بعدين ارجع على الشمال.	امشي في نفس الاتجاه حوالي خمسة دقائق ثم أعود إلى الشمال.
هل أجعله يعاود الاتصال بك عندما يعود ؟	بتحب أخليه يرجع يرنلك بس يرجع؟	هل تحب أن يرجع هاتفك مرة أخرى ؟
من المرجح أن محبا للإبداع الفني مثلك سيستمتع اللوحات الزيتية غير التقليدية وعروض الموسيقى بالشوارع .	متوقع من محب للابداع الفني مثلك راح ينبسط باللوحات الزيتية والموسيقى وعروض الموسيقى بالشوارع.	أعتقد أن من محب للابداع الفني مثلك سيبسط في اللوح الزيتية والموسيقى وعروض الموسيقى في الشوارع.
هل رشحت لي رحلة قصيرة ؟	هل اخترتلي رحلة قصيرة؟	هل اخترتلي رحلة قصيرة ؟
إنها سبعة عشر ايه . اوه ، انا آسف . لقد أخطأت .	هي سبعتعشر ايه . اوه ، أني آسف . غلطت	إنها سبعة عشر ايه. اوه ، أنا آسف. لقد خطأت.
كم المدة التي قضتها هي حتى الآن في المملكة المتحدة ؟	قديش المدة اللي عاشتها بإنجلترا؟	كم المدة التي عاشتها في إنجلترا ؟
هل قرّرتَ ؟	قررت؟	هل قررت ؟
هل نذهب إلى أي مكان متحدثين مثل ذلك ؟	راح نظل نحكي هيك وين ما نروح؟	هل سنقوم بالتحدث هكذا أين لا نذهب ؟
سأذهب كي أسأل البواب عن الأجرة المناسبة .	رايح اسأل البواب عن الأجرة الصحيحة.	أنا ذاهب لأسأل البواب عن الأجرة الصحيحة.
اللون البني محبب هذا العام .	اللون البني مرغوب هالسنة.	اللون البني مرغوب هذا العام.
هناك قطع في بلوزتي . أتساءل هل يمكنك أن تخيطيه لي ، من فضلك ؟	في مزع ببلوزتي. بدي اسألك اذا بتقدر تخيطلي اياه، لو سمحت؟	هناك مزع في لوزتي. أريد أن أسألك إذا يمكنك أن تضع لي هذه ، من فضلك ؟
هل هذه هي آخر محطة ؟	هاظا آخر موقف؟	هل هذا آخر موقف ؟
هل يمكنني تركها في أي مكان من البلاد ؟	بقدر أسيبها بأي مكان بالبلد؟	هل يمكنني أن أسيبها في أي مكان في البلد ؟
أريد بعض التفاح ، من فضلك .	بدي شوية تفاح، لو سمحت.	أريد بعض التفاح ، من فضلك.
أخشى أن لا يكون هنا أية دورة لتعليم الجولف .	خايف ما يكون في دورة لتعليم الجولف	أخشى أن لا تكون هناك دورة لتعليم الجولف.
دعني أحول هذه المكالمة إلى المسئول .	خليني أحوّل هاي المكالمة للمسؤول.	دعني أحصل على هذه المكالمة للمسؤول.
هل يمكن أن تحجزوا في العرض ؟	ممكن تحجزولي بالعرض؟	هل يمكنك أن تحجز لي في العرض ؟
أنا أقيم في فندق هيلتون .	أنا قاعد بفندق الهلتون.	أنا قاعد في فندق الهلتون.
أحب هذه الخدمة بتقديم شامبانيا للتحية بعد الإقلاع . دعني أشرب فى صحتك .	بحب هاي خدمة توزيع شامبانيا للترحيب بعد ما نطير. خليني أشرب بصحتك.	أفضل هذه خدمة توزيع شامبانيا للترحيب بعد أن نطير. دعني أناول طعاماً في صحتك.
ما هو الحد الأدنى للعمر لفعل ذلك ؟	إيش أقل عمر مسموح يعمل هيك؟	ما هو عمر مسموح أن يعمل ذلك ؟
إلى فندقي ، من فضلك ، إن عنوان فندقي في هذه الورقة .	للفندق تبعي، لو سمحت، العنوان تبع الفندق ع هالورقة.	إلى الفندق تبعي ، من فضلك ، العنوان تبع الفندق على هذه اللورقة.
أريد لقاء السيد ويليم .	بدي أشوف الأستاذ ويليم.	أريد أن أرى الأستاذ ويليم.
النبيذ ليس باردا بشكل كافي . هل نمكنك أن تجعله أكثر برودة ؟	الواين مش بارد كفاية. ممكن تبرده اكثر؟	الواين ليس بارد جداً. هل يمكنك أن تبرده أكثر ؟
بكم هذا العطر ؟	بقديش هاظا العطر؟	كم هذا العطر ؟
بالتأكيد سوف ترسلهم ، أليس كذلك ؟	أكيد راح تبعتثم، صح؟	يبدو أنك ستتناول الثامنة ، أليس كذلك ؟
أسف ، هذا المكان محجوز بالفعل .	آسف، هاذ المكان محجوز فعلاً.	آسف ، هذا المكان محجوز فعلاً.
من فضلك أعطني بعض النقود الفكة .	لو سمحت أعطيني شوية فراطة.	من فضلك أعطني بعض الفكة.
لا أعرف شيئاً عن هذا الأمر .	ما بعرف إشي عن هالشغلة.	لا أعرف شيئاً عن هذه العملة.
حفلتك مقامة الآن . تفضل .	حفلتك مبلشة هسا. تفظل.	حفلتك مبلشة الآن. تظل.
أخطط للبقاء لمدة اثنا عشر يوماً .	بخطط أظل اثنعشر يوم.	أخطط أن أظل اثنان عشر يوماً.
يوجد الكثير من السائحين بالقرب من المبنى ، ويبدو أنهم تجمعوا لإلقاء نظرة على ما يحدث .	في كتير سواح حوالين البناية، شكلهم متجمعين عشان يشوفوا شو اللي بصير.	هناك كثير من السواح حول البناية ، يبدو أنهم متجمعين لمشاهدة ماذا سيحدث.
هل لك أن تقدر التكلفة قبل أن تبدأ العمل فيها ؟	ممكن تقدر قديش بكلف قبل ما تبدا شغل فيه؟	هل لك أن تقدر كم تتكلف قبل أن تبدا عمله ؟
نعم . تم نقل أمتعة شخص آخر إلى غرفتي تواً . من فضلك ، هل من الممكن أن تقوم بفحصها ؟	اه، في شناتي لحدا ثاني وصلت غرفتي هسا.لو سمحت، ممكن تشوفها؟	نعم ، هناك حقائب أخرى وصلت غرفتي الآن. من فضلك ، هل يمكن أن تشاهدها ؟
أريد أن أحصل على تعويض لذلك .	أنا بدي اوخد تعويض عن هاظ.	أنا أريد أن أخذ تعويض عن هذا.
بالتأكيد , كن على راحتك .	أكيد، كون على طبيعتك	بالتأكيد ، كن على طبيعتك.
إن ثمة خطأ ما في بطاقة المفتاح هذه ، أعطني غيره ، من فضلك .	فيها غلطة شكلها بالكارت هاي، عطني وحدة ثانية، الله يخليك.	هناك خطأ في شكلها في هذه الحقيبة ، خذني واحدة أخرى ، شكراً لك.
من فضلك اتصل لي برقم ثلاثة اثنان ستة اثنان تسعة واحد ثمانية .	لو سمحت، رنلي على الرقم ثلاثة اثنين ستة اثنين تسعة واحد ثمانية.	من فضلك ، اتصل بي بالرقم ثلاثة اثنان ستة اثنان تسعة واحد ثمانية.
أين مدخل مترو الأنفاق ؟	وين دخلة المترو؟	أين دخل المترو ؟
معذرة . ولكني أريد تسليم تقرير السرقة .	معلش، بس بدي أسلم تقرير السرقة.	معذرة ، ولكنني أريد أن أسلم تقرير السرقة.
هذا المقاس ، الذي تسميه المقاس العادي ، سوف تجده هنا .	هاذ الحجم ، اللي بتسميه حجم عادي، راح تلاقيه هون .	هذا الحجم ، الذي تسميه حجم عادي ، ستجده هنا.
إنه رديء الصنع .	هو مش صنوع منيح.	إنه ليس صنوع جيدا.
هل يمكن أن تخبرني عن ساعات العمل ؟	ممكن تحكيلي عن ساعات الشغل؟	هل لك أن تخبرني عن ساعات العمل ؟
اعطني شهادة طبية , من فضلك .	عطيني وصفة طبية ، لو سمحت .	خذني وصفة طبية ، من فضلك.
ليس معي فكة صغيرة .	ما معي فراطة.	لا معي فراطة.
هل يمكن أن أرى هذا ؟	ممكن أشوف هاظا؟	هل يمكنني أن أرى هذا ؟
ليس لدى أي شئ لكي أعلنه .	ما عندي أي اشي عشان أعلنه.	لا أستطيع أي شيء لكي أعلنه.
أعتقد أنني تركت كاميرتي وغادرت عندما كنت أتناول العشاء هنا الليلة الماضية .	بظن اني تركت كميرتي و روحت لما كنت اكل هون امبارح عالعشا.	أعتقد أنني تركت كميرتي وذهبت عندما كنت أتناول هنا صباح الغد.
دعنا نجتمع لنبحث الأمر أكثر .	خلينا نلتقي عشان اناقش هاظ الموضوع أكثر.	دعنا نلتقي لكي نناقش هذا الموضوع أكثر.
هيه ، هذا فستان جميل حقا .	مرحبا ، هاذا فعلا فسطان حلو.	مرحباً ، هذا فقط فسطان جميل.
من فضلك كن صديقي بالمراسلة .	من فضلك, كون صاحبي عالتواصل.	من فضلك, كون صديقي للتواصل.
أعطني خمسين ، من فضلك .	اعطيني خمسين ، إذا سمحت.	اعطني خمسين ، من فضلك.
ما هذا المكان الذي نمر به الآن ؟	شو هالمكان اللي بنمر فيه هسا؟	ما هذا المكان الذي نمر فيه الآن ؟
هل لي في استعارة بعض البياضات ؟	ممكن أستعير شرارشف؟	هل يمكنني استعارة شرارشف ؟
أوه , يبدو كأنه قرعة .	أوه، شكله قرعة .	أوه ، يبدو أنها قرعة.
اشعر كأن هناك تحديق في . هل من النادر رؤية شخص ياباني ؟	حاسك بتسرح فيه. لهاي الدرجة قليل تشوف واحد ياباني؟	أنت تجلس فيه. هل لديك بعض الوقت للمشاهدة واحد ياباني ؟
سنبعث لك بالبريد عشرين عينة إضافية .	رح نبعتلك عالبريد عشرين عينة زيادة.	سنرسل لك على البريد عشرين عينة إضافية.
إن الرصيف رقم خمسة يقع هناك .	الرصيف رقم خمسة موجود هناك.	الرصيف رقم خمسة موجود هناك.
أين يوجد مكان لطيف لقضاء نزهة ليوم واحد ؟	وين بلاقي مكان لطيف أظل فيه رحلة ليوم واحد؟	أين يمكنني أن أجد مكان لطيف يظل فيه رحلة يوم واحد ؟
يا سيد كاواي لدينا مائدة لك الآن . تفضل من هنا .	يا أستاذ كاواي، عنا طاولة الك حاليا. تعال من هون.	يا سيدي كاواي ، لدينا مائدة لك حالياً. اذهب من هنا.
لا توجد مشكلة . إذا حضرت في الخامس من سبتمبر ، فسيكون بإمكانك الاستمتاع بعرض فيلم علمي لأن عندنا يوماً خاصاً مفتوحاً أول يوم جمعة من كل شهر .	ما في مشكلة. اذا اجيت بخمسة تسعة ، بتقدر تستمتع بالفلم العلمي لأنه احنا عنا يوم مميز مفتوح بأول جمعة من كل شهر.	لا يوجد مشكلة. إذا ذهبت في الخامسة عشر ، يمكنك أن تستمتع بالفيلم العلمي لأننا لدينا يوم مميز مفتوح في أول جمعة من كل شهر.
هل بإمكاني الحصول على طبق آخر مثل هذا ؟	بقدر آخذ صحن ثاني مثل هاذ؟	هل يمكنني الحصول على صحن آخر مثل هذا ؟
لا تهتم . على أي حال ، خذني من فضلك إلى مركز الحي الصيني . سأحاول أن أجده بنفسي .	ما تشيل هم. يلا، خذني لو سمحت لمركز الحي الصيني. راح احاول ادور الجهة وحدي.	لا تتركهم. حسنا ، خذني من فضلك إلى مركز الحي الصيني. سأحاول أن أبحث عن الجهة ذاتها.
أهه ، هيا . دولارين فقط .	اها، يلا. بس دولارين.	حسنا ، حالا. فقط دولارين.
سندويتشان برجر بالجبن ، من فضلك .	اثنين برجر بالجبنة، لو سمحت.	اثنان برجر في الجبن ، من فضلك.
أرغب في كريم مسائي للبشرة .	بدي كريم ليلي للبشرة.	أريد كريم ليلي للبشرة.
متى سنقلع ؟	أميت راح نقلع؟	متى سنقلع ؟
هذا طيب ، على ما يبدو .	هاذ طيب ، من شكله.	هذا طيب ، من فضلك.
حسنا , الوقت متأخر إلى حد ما . أعتقد أنني يجب على أن أغادر الآن . شكرا جزيلا لك على الأمسية الرائعة .	ماشي, الوقت صار متأخر شوي. بظن انو لازم اروّح هسا. كتير شكرا على الليلة الممتعة.	حسناً, الوقت انتهى قليلاً. أعتقد أنني يجب أن أذهب الآن. شكراً جزيلاً على الليلة الممتعة.
لقد سقطت من على درجات السلم .	وقعت من على درج السلم	لقد وقعت من على درج السلم.
هذه السن في المقدمة تؤلمني .	هالسنة في الامام بتوجعني.	هذا العام في الامام يؤلمني.
من أي نوع من الجلد الصناعي صُنعت حقيبة السفر هذه ؟	شو نوع الجلد الاصطناعي المصنوع منه شنطة السفر هاي؟	ما نوع الجلد الاصطناعي المصنوع منه حقيبة السفر هذه ؟
أين نشأت سمكات الفراش هذه ؟	من وين جاية سمكات الفراش هاي؟	من أين يمكنني أن أجد سمكات الفراش هذه ؟
سأخطط لإرسال فواتير حاجياتي اليومية ، لذا من فضلك أخبرني العنوان و اسم الشخص المسئول من فضلك .	رح أبعث فواتير حاجاتي اليومية، عشان هيك لو سمحت أعطيني عنوان واسم الشخص المسؤول.	سأرسل فواتير حاجاتي اليومية ، لذلك من فضلك أعطني عنوان واسم الشخص المسؤول.
أريد نسخة من تقرير السرقة .	بدي نسخة من تقرير السرقة.	أريد نسخة من تقرير السرقة.
أريد السفر من شنغهاي إلى هاواي بالباخرة .	بدي أروح من شنغهاي لهاواي عالسفينة.	أريد الذهاب من شنغ هاي إلى هاواي على متن السفينة.
جريدة باللغة الإنجليزية ، لطفاً .	جريدة بالانجليزي، لو سمحت.	جريدة الإنجليزية ، من فضلك.
هل هناك سيارة ليموزين ؟	في سيارة ليموزين؟	هل يوجد سيارة ليموزين ؟
لا أريد واحدة ضخمة .	ما بدي وحدة دفشة.	لا أريد واحدة دفشة.
أريد فندقاً آمنا يقدم إفطاراً جيدا ، من فضلك ؟	بدي فندق آمن ، بقدم فطور كويس ، لو سمحت ؟	أريد فندق آمن ، قدم فطور جيداً ، من فضلك ؟
أربعة وعشرين دولاراً . هل تريد المزيد ؟	أربعة وعشرين دولار. بدك كمان؟	أربعة وعشرون دولاراً. هل تريد ذلك ؟
وقعت منى الشوكة . من فضلك أحضر واحدة أخرى .	وقعت مني الشوكة. لو سمحت جبلي وحدة ثانية.	لقد وقعت مني الشوكة. من فضلك أحضر لي واحدة أخرى.
لاحظ الفجوة ، لاحظ الفجوة ، ثم قرب الأبواب ، من فضلك .	لاحظ الفتحة، لاحظ الفتحة ، بعدين قرب الابواب، لو سمحت.	لاحظ الفتحة ، لاحظ الفتحة ، ثم أقرب الأبواب ، من فضلك.
من فضلك ساعدني أعثر على مرشد يتحدث اليابانية .	لو سمحت ساعدني ألاقي دليل سياحي بحكي ياباني.	من فضلك ساعدني في الحصول على دليل سياحي يتحدث اليابانية.
ماذا عن هذه النماذج البلاستيكة ؟	شو رأيك بموديلات البلاستك هاي؟	ما رأيك في موديلات البلاستك هذه ؟
دعونا نحتفل ، هكذا قال وآخذني إلى بار . وقال إنه سيُجري مكالمة هاتفية وغادر ولم يعد أبداً وتحملت أنا وحدي عبء فاتورة ضخمة .	"خلينا تحتفل" هيك قال وأخذني على البار. حكى انه رايح يعمل مكالمة وراح وما رجع إجى أبداً وأنا تورطت بفاتورة كبيرة.	خذني إلى البار. قال أنه سيأتي يقوم بعمل مكالمة وسوف يعود مرة أخرى.
أرغب في خلع أسناني .	أنا حاب أقلع سناني.	أنا أريد أن أقلع سناني.
أريد منبه ، من فضلك .	بدي منبه، لو سمحت.	أريد منبه ، من فضلك.
ما توقيت إجراءات مغادرة الفندق ؟	متى منقدر نعمل الاجراءات حتى نطلع من الفندق؟	متى يمكننا أن نقوم بعمل الاجراءات للذهاب من الفندق ؟
أريد أن أحصل على استراحة .	بدي أوخذ بريك.	أريد أن آخذ بريك.
هذه الغرفة اثنان صفر واحد . أريد أن أطلب إفطار الغد .	هاي الغرفة رقم اثنين صفر واحد. بدي أطلب فطور بكرا.	هذه الغرفة رقم اثنان صفر واحد. أريد طلب فطور غداً.
هل هذا مصنوع من القطن ؟	هاذ مصنوع من القطن؟	هل هذا مصنوع من القطن ؟
ما هو مقدار الرسوم للوزن الزائد ؟	قديش الدفع على الوزن الزايد؟	كم الدفع على الوزن الزايد ؟
لدي معداتي الخاصة .	عندي أدواتي الخاصة.	لدي أدواتي الخاصة بي.
في غرفة انتظار بالمحطة .	في غرفة انتظار بالمحطة.	هل يوجد غرفة انتظار في المحطة ؟
كيف أستطيع مساعدتك ؟	كيف بقدر اساعدك ؟	كيف يمكنني أن أساعدك ؟
ادخل . من فضلك ضعها على المائدة هناك .	أدخل. لو سمحت حطها على الطاولة هنيك.	أدخل. من فضلك ضعها على الطاولة هنا.
حسناً . سأتأكد أن حقائبك ستكون هنا .	طيب . راح أتأكد إنه الشناتي رح تكون هون.	حسناً. سأتأكد أن حقائبي ستكون هنا.
سنأتي في السابعة .	رح نيجي الساعة سبعة.	سنأتي في السابعة.
حقاً . اليوم هو الأحد ، والأحد هو أسوء الأيام .	فعلاً. اليوم الأحد، والأحد أسوأ الأيام.	فعلاً. اليوم الأحد ، والأحد أسوأ الأيام.
إما أن تصلحها أو تستبدلها ، من فضلك .	يا تصلحها يا تبدلها، لو سمحت.	يا تصلحها يا تبديلها ، من فضلك.
ربما أعطيك إجابة أفضل من تلك بعد عرضين .	يمكن أعطيك جواب أحسن من هاذ بعد ما أشوفه مرتين.	هل يمكن أن أعطيك جواب أفضل من هذا بعد أن أرى ذلك مرتين ؟
إن ارتفاعه ألفان وأربعمائة متر .	إنو ارتفاعه ألفين وأربعمية متر.	إنها ارتفاعه ألفين وأربعمائة متر.
هل يمكن أن أستعيد متعلقات ؟	ممكن أرجع متعلقاتي؟	هل يمكنني إعادة متعلقاتي ؟
هل بإمكاني إجراء طلبية ؟	بقدر اطلب؟	هل يمكنني الحصول على طلب ؟
إنه خطئي . ليس خطأك .	هاي غلطتي. مش غلطتك.	هذه خطأ. ليس خطأك.
لا يوجد أي منها .	ما في منهم.	لا يوجد منهم.
أريد غرفة بمنظر جميل .	بدي غرفة مع إطلالة حلوة.	أريد غرفة مع إطلالة جميلة.
أنا ياباني .	أني ياباني.	أنا ياباني.
هل لديكم دبابيس زينة ذات تصميمات رائعة ؟	عندك بروشات شكلها حلو؟	هل لديك بروشات جميلة ؟
يبدوا أنني غير قادر على الحصول على الماء الساخن .	شكله مش قادر يجيب ميّة ساخنة.	يبدو أنه لا يمكن أن يجب ماء ساخن.
هلا وقفت معي لالتقاط صورة ؟	بتقدر توقف معي شوي عشان نصور صورة؟	هل يمكنك أن توقف لي قليلاً لكي نصور صورة ؟
لا أعتقد أن ذلك يناسبني فجلدي جاف إلى حد ما .	ما بعتقد انه هاد بلبقلي، جلدي ناشف كثير.	لا أعتقد أن هذا يناسبني. لقد وضعت يدي على ما يرام.
أكون ممتنا جدا لو أخذتني إلى الشاطئ .	راح أكون كثير ممنون لو توخذني لعند الشط.	سأكون حقاً ممتن لو توصلني إلى عند الشاطئ.
هل يمكنني الحصول على تذكرتين درجة ثانية لشيكاغوا , من فضلك ؟	ممكن أحجز تذكرتين لشيكاغو من الدرجة الثانية، لو سمحت؟	هل يمكنني حجز تذكرتين لشيكاغو من الدرجة الثانية ، من فضلك ؟
أجل ، أنا . لقد كانوا يعيشون بجواري في كاليفورنيا لكنهم انتقلوا إلى فلوريدا منذ عامين . ماذا عنك ؟ هل تسافر بمفردك ؟	أيوه، أنا. كانوا عايشين بحدي بكاليفورنيا بس انتقلوا على فلوريدا من سنتين. شو بالنسبة الك؟ بتسافر لحالك؟	نعم ، أنا. كانوا يعيشون في كاليفورنيا لكن انتقلوا إلى فلوريدا منذ سنتين. ماذا عنك ؟ هل تسافر إليك ؟
أنا من طوكيو .	أني من طوكيو.	أنا من طوكيو.
أي منتجات صوفية أخرى ؟	في منتجات صوف ثانية؟	هل توجد منتجات صوف أخرى ؟
هل من الممكن أن تخبرنا كيف تقيم هذه الخطة ؟	ممكن تحكيلنا كيف بتعمل هاي الخطة ؟	هل لك أن تخبرني كيف تقوم بعمل هذه الخطة ؟
مساء الخير . أهلا .	مسا الخير. أهلين.	مساء الخير. جميعاً.
اخرج من ذلك الباب ، وانتظر عند المحطة رقم ستة .	طلع من هاي الباب، و انطر عند المحطة رقم ستة.	خرج من هذا الباب ، واطر عند المحطة رقم ستة.
سبعاً ، من فضلك .	سبعة، لو سمحت.	سبعة ، من فضلك.
مهزوز ، وليس مضروب .	محرك، مش مخفوق.	محرك ، لا يبدو مخفوق.
ثلاثة أيام .	ثلاث أيام.	ثلاثة أيام.
تريد أن تشتري ثوبا .	هي بدها تشتري فسطان.	إنها تريد شراء فسطان.
لا ، ليس بعد ، هناك الكثير نختار فيه .	لا، بعده ، في كثير عشان تنقي منه	لا ، بعد ، هناك كثيراً لحفظه.
سر في خط مستقيم على طول النهر حوالي نصف ميل . ستصل للمتنزه .	إمشي دغري على طول النهر حوالي نص ميل. بتصل المنتزه.	مشي على طول النهر حوالي نصف ميل. تصل المنتزه.
أسف أنني بحاجة إلى أن أطلع على أي مستند لتحديد الهوية .	أسف أني بحاجة إني أشوف اثبات هوية.	أعتقد أنني بحاجة إلى أن أرى اثبات هوية.
كن حذراً ، السقف منخفض .	انتبه ، السقف واطي.	حسناً ، السقف ضيق.
كم تتقاضى لتطبيع صور الفيلم ؟	قديش بتوخذ عشان تطبع صور الفلم؟	كم تتقاضى لكي تطبع صور الفيلم ؟
هل يدخل هذا في حدود المعفي من الضرائب ؟	هاظ معفي من الضرايب؟	هل هذا معفي من الضرائيب ؟
غرفة مفردة بدون دش من فضلك .	غرفة مفردة بدون دش لو سمحت .	غرفة مفردة بدون دش من فضلك.
هل يمكن أن تدلّني أين أجد القنصلية اليابانية ؟	ممكن تحكيلي وين بقدر ألاقي القنصلية اليابانية؟	هل لك أن تخبرني أين يمكنني أن أجد القنصلية اليابانية ؟
من فضلك ضعها في قمع .	لو سمحت حطها ببوري.	من فضلك ضعها في صندوق.
نصف أوقية من شانيل رقم خمسة من فضلك .	نص أوقية من شانيل رقم خمسة، لو سمحت.	نصف أوقية من شانيل رقم خمسة ، من فضلك.
شخصان .	شخصين.	شخصين.
هل تعرف ما إذا كان هناك أي فنادق رخيصة الأسعار ؟	بتعرف اذا في أي فنادق رخيصة؟	هل تعرف إذا هناك أي فنادق رخيصة ؟
أريد أن أقدم طلباً للحصول على إصدار جديد .	بدي أقدم طلب مشان اخد إصدار جديد.	أريد أن أقدم طلباً لكي أجد إصدار جديد.
أريد بزة .	بدي سترة.	أريد سترة.
هذا مكلف نوعا ما .	هاي بتكلف شوي.	هذه تكلف قليلاً.
لقد طلبت لحما لا سمكا . هل يمكنك تغيير هذا ؟	طلبت لحم مش سمك. ممكن تغير هاي؟	طلبت لحم غير سمك. هل لك أن تغير هذا ؟
عذراً . هل يوجد محل كتب قريب من هنا ؟	عفواً . في مكتبة بتبيع كتب قريب من هون ؟	عفواً. هل يوجد مكتبة لبيع كتب بالقرب من هنا ؟
حينئذ سنأخذها .	بهالوقت رح نوخذها.	في هذا الوقت سنأخذها.
إنه بعيد جداً . يحسن بك أن تأخذ سيارة أجرة .	هو بعيد كتير. فضل أكيد تاخذ تكسي.	إنه ضخم جداً. فضلاً تأخذ سيارة أجرة.
في أي وقت نبدأ ؟	على أي ساعة راح نبلش؟	في أي وقت سنبدأ ؟
حسناً . لقد تم التأكيد . هل يمكننا أن نأخذ رقم تليفونك في حالة الحاجة إلى الاتصال بك ؟	ماشي، اتأكدت . بنقدر نوخذ رقمك تلفونك في حال احتجنا نتصل فيك؟	حسناً ، لقد اتأكدت. هل يمكننا أن نأخذ رقمك هاتفك في حالة احتاجنا للتصل بك ؟
حسنا . خصم خمسة في المائة . هل يوافقك لك ؟	ماشي ، خصم خمسة بالمية. بمشي معك؟	حسناً ، خصم خمسة بالمئة. هل يمشي معك ؟
الآن ، مكالمتك ردت . تفضل من فضلك .	حاليا، مكالمتك رجعت. تفضل لو سمحت.	حاليا ، مكالمتك رجعت. تفضل من فضلك.
أوه ، أهي كذلك ؟ كيف تفضلها ؟	أووه، هي هيك؟ كيف بتحبها؟	نعم ، هي كذلك ؟ كيف تحبها ؟
أنا فقدت أثر بريد مسجّل .	ضيعت أثر رسالة مسجلة.	لقد فقدت أثر رسالة مسجلة.
لا أشعر بحالة جيدة . هل ترشدني إلى طبيب ؟	ما بحس حالي ملبح. ممكن ادلني على دكتور؟	لا أشعر بألم. هل يمكن أن أرسلني إلى طبيب ؟
هل أنت ملم بجغرافيا اليابان ؟	إنت ملم بتظاريس اليابان؟	هل أنت مصاب بألم في اليابان ؟
لا أستطيع رؤية الشاشة جيداً من هنا ، هل يمكنني تبديل المقاعد لبعض الوقت ؟	أنا مش قادر أشوف الشاشة مليح من هون. ممكن نبدل المقاعد شوي؟	أنا لا أستطيع أن أرى الشاشة جيداً من هنا. هل يمكننا تغيير المقاعد قليلاً ؟
سعر الغرفة هو ستة آلاف ين في الليلة .	سعر الغرفة ست آلاف ين لليلة.	سعر الغرفة ستة آلاف ين لليلة.
أعتقد أن سيارتي تستحق حوالي خمسة آلاف دولارا .	أنا بتوقع سيارتي بتسوى حوالي خمس الآف دولار.	أنا أظن أن سيارتي تتقاضى حوالي خمسة آلاف دولاراً.
أين حديقة الحيوان ؟	وين حديقة الحيوانات؟	أين حديقة الحيوانات ؟
هي تريد بيرة .	هي بدها بيرا .	إنها تريد بيرا.
هل هذه الحقيبة مناسبة لكل حالات الطقس ؟	هاي الشنتة بتناسب كل حالات الجو؟	هل هذه الحقيبة تناسب كل حالات الجو ؟
أفضل شيء هو اسطوانة مصغرة .	أحسن اشي هو سي دي صغير.	أفضل شيء هو سي دي صغير.
فهمت ، في هذه الحالة ليس علىّ أن أدفع أجر التبديلات ، أليس كذلك ؟	فهمت، بهاي الحالة ما عليي أدفع فلوس التبديلات، مش هيك؟	لقد فهمت ، في هذه الحالة لا يمكنني أن أدفع فلوس التبديلات ، ليس كذلك.
هل يمكنك أن تريني حجماً أكبر بقليل ؟	ممكن توريني سايز اكبر شوي؟	هل يمكن أن تريني سايز أكبر قليلاً ؟
هل يمكنك بطريقة ما أن تصف لي مرضك بالإنجليزية ؟	بتقدر بأي طريقة تشرحلي مرضك بالإنجليزي؟	هل يمكنك أن تشرح مرضك بالإنجليزية ؟
انتقلنا إلى هذا المنزل منذ عام .	رحلنا لهاظ البيت من سنة.	رحلنا إلى هذا المنزل منذ عام.
معذرة ، هل يسعني أن أتوجه إليك بسؤال ؟	معلش، بقدر أوجهلك سؤال؟	معذرة ، هل يمكنني أن أوجه لك سؤالاً ؟
هذا سعر مرتفع ، أليس كذلك ؟	هاظا سعره غالي، صح؟	هذا سعر غالي ، أليس كذلك ؟
نعم ، ولكن تأكد أن تذكرتك معك .	ايوه، بس تأكد إنه تذكرتك معك.	نعم ، ولكن تأكد أن تذكرتك معك.
ما رأيك في موضوع التحرش الجنسي في مكان العمل ؟	شو رأيك بالتحرشات الجنسية اللي بتصير بمكان الشغل؟	ما رأيك في التحرشات الجنسية التي تحدث في مكان العمل ؟
أريد تذكرتين ذهاب وعودة إلى أكسفورد .	بدي تذكرتين روحة رجعة على أكسفورد.	أريد تذكرتين ذهاب وعودة إلى أكسفورد.
هل ستذهب إلى المدرسة هنا ؟	رح تروح عالمدرسة هون؟	هل ستذهب إلى المدرسة هنا ؟
أود بعضاً من فيلم رقم ايه إس ايه لهذه الكاميرا ، من فضلك .	بدي فيلم رقم ايه إس ايه لهاي الكميرا، لو سمحت.	أريد فيلماً رقم ايه إس ايه لهذه الكاميرا ، من فضلك.
أصبت بسحجة .	أني انشخطت.	أنا انتهيت.
أريد تسجيل أمتعتي .	بدي أسجل شنطي.	أريد أن أسجل حقائبي.
أريد أن أرى ذاك الذي في نافذة العرض ، من فضلك .	بدي أشوف هاذ الموجود بالواجهة، لو سمحت.	أريد أن أرى هذا الموجود في الواجهة ، من فضلك.
ما هي المحتويات ؟	شو المكونات؟	ما هي المكونات ؟
لقد تعطلت سيارتي . من فضلك احضر لتأخذها .	سيارتي خربت. تعال خذها لو سمحت.	سيارتي خربت. تعال خذها من فضلك.
ما النمط الذي في مخيلتك ؟	شو النمط اللي بخيالك؟	ما هو النمط الذي يناسبك ؟
كيف تسير الأمور ؟	كيف ماشية الأمور؟	كيف تعمل الأمور ؟
ألا تسأله أن يتصل بي ؟	بتقدر تحكيله يتصل فيّ؟	هل يمكنك أن تخبره أن يتصل بي ؟
ما الغرض منها ؟	شو الهدف منها؟	ما هو الهدف منها ؟
كيف يربي الآباء اليابانيون أولادهم ؟ هل هم صارمون مع أطفالهم ؟	كيف بيربو الآباء اليابانيين ولادهم؟ همة شديدين مع عيالهم؟	كيف يبدو الآباء اليابانيون وأطفالهم ؟ هذه شديدة جداً مع عيالهم ؟
هلا ضغطت على زر مصراع النافذة ؟	ممكن تكبس كبسة الشباك؟	هل لك أن تكبس كبسة النافذة ؟
أيمكنني أن أذهب هناك بمترو الأنفاق ؟	بقدر أروح هناك بالمترو؟	هل يمكنني الذهاب إلى هناك في مترو الأنفاق ؟
دعنا نشاهد التلفزيون . فيها مباراة بيسبول .	خلينا نتفرج على التلفزيون. في مباراة بيسبول.	دعنا نتفرج على التلفاز. هناك مباراة بيسبول.
حسناً . خذ هذا الاتجاه . من فضلك ، سأوصلك إلى غرفتك .	ماشي، خذ هاي الطريقة. لو سمحت، رح أوصلك لغرفتك.	حسناً ، خذ هذه الطريقة. من فضلك ، سأصلك إلى غرفتك.
أريد تمويج متقارب لشعري ، من فضلك .	بدي أعمل شعري كيرلي ، لو سمحت.	أريد أن أقوم بعمل شعري كيرلي ، من فضلك.
نريد مائدة في الشرفة .	بدنا طاولة على البرندة.	نريد مائدة على البرند.
معدتي ثقيلة .	معدتي كبيرة.	معدتي كبيرة.
أعد ذلك , من فضلك .	عيدها، لو سمحت.	عيدها ، من فضلك.
سآخذ صورة لجاك دانيلز .	راح آخذ صورة لجاك دانيلز.	سأخذ صورة لجاك دانيلز.
هل لديكم أطباق ذات سعرات حرارية منخفضة ؟ فأنا أتبع نظاما غذائياً حالياً .	عندكو وجبات قليلة الكالوريز ؟ أنا ماشية بدايت هالأيام.	هل لديكم وجبات قليلة الكالوريز ؟ أنا على متن الانتظار هذه الأيام.
ما هي الفوارق بين هذه الفنادق ؟	شو الفرق بين هاي الفنادق؟	ما هو الفرق بين هذه الفنادق ؟
لم أقم بالحجز .	ما عملت حجز.	لا أقوم بالحجز.
هل لديك أية فكة لعداد الانتظار ؟	عندك عملة للبارك ميتر؟	هل لديك عملة للبارك ميتر ؟
أيهما تفضل , داكن أم فاتح ؟	شو بتحب أكثر, غامق أو فاتح؟	ماذا تحب أكثر ، غامق أم فاتح ؟
حسناً سيدي . وما الحلو الذي تريد أن تختم به الطعام ؟	طيب يا استاذي.. شو الحلو اللي بدك تختم فيه الأكل ؟	حسناً يا سيدي. ما هو الحلوى الذي تريد أن تختم به الطعام ؟
إنني أسجل لخروجي من الفندق . هلا أرسلت خادماً إلى أعلى ؟	أني بعمل تشيك اوت. ممكن تودي عامل لفوق؟	أنا أعمل تشيك اوت. هل يمكنك أن تعطي عاملاً إلى أعلى ؟
كيف يمكنني الذهاب إلى ديزني لاند ؟	شلون بقدر أروح على ديزني لاند؟	كيف يمكنني الذهاب إلى ديزني لاند ؟
الآن ، هذه اللوحة خاصة جداً . رسمها تسوروتارو كاتاأوكا . إنه معروف بأنه فنان عالمي .	هسا، هاي اللوحة كثير مميزة. رسمها تسوروتارو كاتاأوكا. معروف هاذ فنان عالمي.	حالا ، هذه اللوحة رائعة. رسمها تسوروتارو كاتاأوكا. معروف هذا فنان عالمي.
هذه المظلة يمكن استخدامها كعصا للسير .	هاي الشمسية بقدر استخدمها كعصاية.	هذه الشمسية يمكن أن أستخدمها كعصاية.
لأن الصيف في اليابان عادة ما يكون شديد الحرارة ، ولم يكن لدينا تكييف هواء قديماً .	لأنه الصيف باليابان عادة بكون حامي كثير، وما كان عندنا مكيف هوا زمان.	لأن الصيف في اليابان عادة يكون حار جداً ، لكن لم يكن لدينا مكيف هواً منذ فترة طويلة.
الشيء نفسه لي ، من فضلك .	ونفس الشي إلي ، لو سمحت.	ونفس الشيء لي ، من فضلك.
يوم الصحة الرياضية هو يوم العاشر من أكتوبر وهو إجازة قومية الغرض منها تحسين صحة المواطنين .	يوم الصحة الرياضية بعشرة عشرة بكون عطلة وطنية عملوه عشان يرفعوا مستوى الصحة عند الناس.	يوم الصحة الرياضية في العاشرة عشرة يكون عطلة وطنية لرفع مستوى الصحة عند الناس.
هل من الممكن أن تنظف المنضدة من فضلك ؟	ممكن تنظف الطاولة، لو سمحت؟	هل يمكن أن تفتح الطاولة ، من فضلك ؟
يوجد عصير أناناس وبرتقال وطماطم .	في عصير أناناس و برتقال و بندورة.	هل يوجد عصير أناناس و برتقال وبندورة ؟
أود الإقامة بهذه الغرفة ليلة واحدة أخرى .	بدي أظل بهاي الغرفة ليلة ثانية.	أريد أن أقيم في هذه الغرفة ليلة أخرى.
ثمانية دولارات . وهنا تأتي واحدة حالا .	ثمن دولرات. وهون بتيجي وحدة هسا.	ثمانية دولرات. وهنا تحضر واحدة الآن.
هذا حسن بالنسبة لي . في الواقع أحب أن أدخن .	هاذ تمام بالنسبة إلي . بصراحة أني بحب أدخن.	هذا حسن بالنسبة لي. بصراحة أنا أحب أن أدخن.
المكان كان على كرسي في البهو .	المكان كان عكرسي باللوبي.	المكان كان عكرسي في اللوبي.
أشعر بصداع خفيف .	حاس بصداع خفيف.	أشعر بصداع خفيف.
ألو ، اسمي أودا . عندي حجز الليلة ، لكن سوف أتأخر في القدوم . لهذا من فضلك اتركوا لي الحجز .	مرحبا، اسمي أودا. عندي حجز هالليلة، بس راح يتأخر وصولي. يرجـى خليكو الحجز لي.	مرحباً ، اسمي أودا. لدي حجز هذا الليلة ، ولكن سيكون متأخراً وصولي. الرجاء أن تملأ الحجز لي.
أين قسم السفر ؟	وين قسم السفر؟	أين قسم السفر ؟
هل لديك أي صورة لبطاقة هوية ؟	عندك اي صورة للهوية؟	هل لديك أي صورة للهووية ؟
هل لك أن تعطيني إشارة بالضوء عندما تكون فيها ؟	بتقدر تعطيني إشارة بالضو لما تكون فيها؟	هل يمكنك أن تعطني إشارة بالضوء عندما تكون فيها ؟
أريد فحص هذه الحقائب المتجه إلى طوكيو , من فضلك .	بدي اتفقد هالشناتي اللي رايحة لطوكيو، لو سمحت.	أريد أن أتفقد هذه الحقائب التي يذهب إلى طوكيو ، من فضلك.
ثمة شئ خطأ في آلة التهوية هذه .	في اشي غلط بالمروحة هاذ.	هل هناك شيء خطأ في المروحة هذا ؟
منذ هذا الصباح .	من الصبح.	من الصباح.
من فضلك قس حجم حذائي .	لو سمحت قيس حجم كندرتي.	من فضلك قيس حجم كندرتي.
أوافق . إنه أحد الأماكن المفضلة لي .	موافق. هاذ واحد من احلا الاماكن عندي.	حسنا. هذا واحد من أفضل الأماكن لدي.
لابد أن تكون هادئة .	لازم تكوني هادية.	يجب أن تكون هدية.
أريد مطفأة سجائر .	بدي منطفة سجاير.	أريد منطفة سجائر.
أود أن أتتناول طبقا مثل هذا .	بدي أوكل صحن زي هاظ.	أريد أن أتناول طبقاً مثل هذا.
أين توجد أقرب مغسلة ؟	وين اقرب مغسلة؟	أين أقرب مغسلة ؟
هل لي بجدول مواعيد ؟	أعطيني جدول المواعيد؟	أعطني جدول المواعيد.
من فضلك اعطني هذه .	لو سمحت اعطيني هاي.	من فضلك أعطني هذه.
هل يمكن أن أذهب لمشاهدة المعالم أثناء رسو السفينة في الميناء ؟	بقدر أروح اشوف المناظر لما السفينة تكون راسية بالمينا؟	هل يمكنني الذهاب لأرى المناظر عندما السفينة تكون جاهزة في المينا ؟
هل يوجد مكان يقبل تنظيف الملابس في أيام الآحاد ؟	في أي مكان بقبل طلبات الغسيل كل يوم أحد؟	هل يوجد أي مكان يقبل طلبات الغسيل كل يوم أحد ؟
هل توجد خدمة نقل بالحافلات إلى متحف فورد ؟	في خدمة باصات بتروح على متحف فورد؟	هل توجد خدمة حافلات تذهب إلى متحف فورد ؟
أنا من النرويج .	أني من النرويج.	أنا من النرويج.
عشرة طوابع من فضلك .	عشر طوابع لو سمحت.	عشر طوابع من فضلك.
هل يمكنك أن تجر سيارتي ؟	ممكن تجرب سيارتي؟	هل يمكن أن تجرب سيارتي ؟
إنه سمك ثعبان مشوي مع مرقة خاصة فوق سلطانية من الأرز .	هاذ سمك الانقليس مع صلصة خاصة محطوطة فوق سلطانية الرز.	هذا سمك الأنقليس مع صلصة خاصة محطوطة فوق سلطانية الرز.
هل يمكنني إعادتها في مدينة مختلفة ؟	بقدر أرجعها بمدينة ثانية؟	هل يمكنني إعادةها في مدينة أخرى ؟
عندي الدواء الخاص بي .	عندي الدوا تاعي.	لدي الدوا الخاص بي.
هل لديكم أفلام للصيف ؟	عندكو أفلام للصيف؟	هل لديكم أفلام للصيف ؟
هل تريد أن تذهب للتسوق معي بعد الظهر ؟	بتحب تيجي معي نتسوق بعد الظهر؟	هل تحب أن تأتي معي لتسوق بعد الظهر ؟
نعم ، سيدي . كيف تريدني أن اقطعها ؟	أيوة ، يا سيدي . كيف بدك إني أقصها؟	نعم ، يا سيدي. كيف تريد أن أقصها ؟
عندما أعود ثانية إلى اليابان ، سأكتب خطاباً . وإذا كان لديك وقت ، من فضلك أرسل لي خطاباً .	لما أرجع مرة ثانية لليابان، رح أكتب رسالة. وإذا كان عندك وقت، تكرم ابعثلي انا رسالة.	عند العودة ثانية إلى اليابان ، سأكتب رسالة. وإذا كان لديك وقت ، فضلا أرسل لي رسالة.
فراولة ، من فضلك .	فراولة، لو سمحت.	فراولة ، من فضلك.
هل تفضل ماسكات للشعر أصغر أم أكبر ؟	بتحبي القناع للشعر أصغر ولا أكبر؟	هل تحب القناع للشعر أصغر أم أكبر ؟
بالتأكيد . متى تود أن تلعب جولف ؟	طبعاً. أميت بدك تلعب جولف؟	طبعاً. متى تريد أن تلعب جولف ؟
من فضلك اجعل الجزء العلوي أطول قليلاً .	من فضلك خلي الجزء الفوقاني أطول شوي.	من فضلك اجعل الجزء الفوقاني أطول قليلاً.
كم أوقية من العطر أستطيع الحصول عليه من غير رسوم ؟	كم وقية من العطر بقدر أوخذها بدون رسوم ؟	كم وقية من العطر يمكنني الحصول عليها بدون رسوم ؟
معذرة , قم بالضغط على مصراعي النافذة الخشبيين , من فضلك .	عفواً، نزل اباجور الشباك الخشب , لو سمحت.	عفواً ، نزل اباجور الشباك الخشب, من فضلك.
لدي ثلاث حقائب .	عندي ثلث شناتي.	لدي ثلاث حقائب.
هذا البيت يبدو مريحا للمعيشة فيه , أليس كذلك ؟	هاد البيت مبين كثير مريح العيشة فيه، مش هيك؟	هذا المنزل يبدو كثيراً مريح الغرف فيه ، ليس كذلك ؟
أريد أن أغسل ملابسي في وقت لاحق اليوم .	بدي أغسل وعيتي بوقت ثاني اليوم.	أريد أغسل وعيتي في وقت آخر اليوم.
أرجو ذلك .	بتمنى هيك.	أتمنى ذلك.
واحد لنيويورك ، من فضلك .	واحد لنيويورك، إذا سمحت.	واحد لنيويورك ، من فضلك.
لا ، إنها لا تشمل الضريبة ومصاريف الخدمة .	لا، هي ما بتشمل الضريبة ومصاريف الخدمة.	لا ، إنها لا تشمل الضريبة والمصاريف الخدمة.
قم بها بطريقتك .	اعملها بطريقتك.	اعملها بطريقتك.
كم تستغرق مشياً على الأقدام ؟	قديش بتوخذ وقت مشي عالجرين؟	كم يستغرق الوقت للذهاب إلى هناك ؟
هل يمكنني الحصول على برنامج ؟	بقدر آخذ برنامج؟	هل يمكنني الحصول على برنامج ؟
من فضلك سجل عنوان الاتصال بك هنا .	من فضلك اكتب عنوانك للتواصل معك هون.	من فضلك اكتب عنوانك للتواصل معك هنا.
نعم ، يا سيد تاناكا هناك رسالتان لك .	أيوة، يا سيد تاناكا، في عندك رسالتين.	نعم ، يا سيد تاناكا ، لديك رسالتين.
هل لي في شيء من لحم الخنزير والبيض ؟	ممكن شوية من لحم الخنزير والبيض؟	هل يمكن أن نقوم ببعض من لحم الخنزير والبيض ؟
إذا حدث ذلك ، من فضلك أتصل بي .	اذا صار هيك ، لو سمحت رنلي .	من فضلك استدعي لي.
أوه ، آسف لأني أزعجتك .	اووه، معذرة الك ازعجتك.	نعم ، أعتقد أنك زعجتك.
هل يمكن أن أقيس مقاس تسعة .	ممكن أقيس مقاس تسعة ؟	هل يمكنني أن أقيس مقاس تسعة ؟
ملابسه دائماً موضة قديمة .	هدومه دايما موضة قديمة.	لقد هدومه دائما موضة قديمة.
هلا حجزت لي تاكسي الساعة السادسة صباح غد , من فضلك ؟	ممكن تحجزلي تكسي الساعة ستة الصبح لبكرا ، لو سمحت؟	هل لك أن تحجز لي سيارة أجرة في الساعة السابعة صباحاً ، من فضلك ؟
إنه صحيح هنا .	هو صحيح هون.	إنه صحيح هنا.
هل يمكن أن تدخل معه فكة صغيرة ؟	بتقدر ادخل معه شوية فراطة؟	هل يمكنني الدخول معه بعض الفرطة ؟
أنا حقا آسف .	أني جد آسف.	أنا آسف جداً.
لقد طلبت ذلك .	طلبت هاظ.	طلبت هذا.
ما تكلفة هذا في اليوم ؟	قديش تكلفته ليوم واحد؟	كم تكلفته يوم واحد ؟
لا توجد أية مشاكل .	ما في أي مشاكل.	لا توجد أي مشاكل.
أجل . سنصل في الثامنة حسب التوقيت المحلي .	أها. رح نوصل الساعة ثمنية بالتوقيت المحلي.	نعم. سنصل في الثامنة بالتوقيت المحلي.
هل لديك واحد أكبر ؟	عندك واحد أكبر؟	هل لديك واحد أكبر ؟
أنا كينجي .	أني كينجي.	أنا كينجي.
إنه المبنى الثاني على يسار هذا المبني الأبيض .	البناية الثانية على يسار البناية البيضا.	البناية الثانية على يسار البناية البيضا.
أعطني قطعة لحم الخنزير هذه ، ولكن ليس بسمك تلك .	أعطييني قطعة لحمة الخنزير هاي، بس ما تكون سميكة مثل هذيك.	أعطني قطعة لحمة الخنزير هذه ، لكن لا تكون سميكة مثل ذلك.
لدي موعد آخر .	عندي موعد ثاني.	لدي موعد آخر.
لدي غرفة جاهزة لك في جراند هويتل . هل تستطيع الذهاب إلى هناك ؟	عندي غرفة جاهزة إلك بالجراند هوتيل. بتقدر تروح لهناك؟	لدي غرفة جاهزة لك في الجراند هوتيل. هل يمكنك الذهاب إلى هناك ؟
أرني واحدة لإحدى الشابات .	وريني وحدة لوحدة من الصبايا.	أرني واحدة من الصبايا.
أود أن أحجز غرفة لهذه الليلة .	بدي أحجز غرفة لهاي الليلة.	أريد حجز غرفة لهذه الليلة.
لقد خلعت البنطلون .	شلحت البنطلون.	لقد شلحت البنطلون.
إنها رائعة .	هاي روعة.	هذه روعة.
أهذه هي الحافلة التي توصل إلى وسط المدينة ؟	هاظ هو الباص اللي بوصل لوسط البلد؟	هل هذه هي الحافلة التي تصل إلى وسط المدينة ؟
أتظن ذلك ؟	بتظن هيك؟	هل تظن ذلك ؟
أود أن أرسله عن طريق البريد .	حاب أبعثه عن طريق البريد.	أريد أن أرسله عبر البريد.
أشكرك ثانية لأنك ذكرتني . هل يميل كثير من الناس أن ينسوا توقيع أسمائهم ؟	بشكرك مرة ثانية عشان ذكرتني. بروح كثير من الناس تنسى توقع ع أسمائهم ولا شو؟	شكراً جزيلاً على ذكرتني. هل يذهب كثير من الناس إلى أسمائهم أم ماذا ؟
هلا أرسلت تاكسي إلى المدخل الرئيسي لـ ويستمانستر مول ؟	ممكن تودي تكسي للمدخل الرئيسي بويستمانستر مول؟	هل يمكنك أن تأخذ سيارة أجرة إلى المدخل الرئيسي بويستمانستر مول ؟
هل لديكم أية جولة سياحية أخرى ؟	عندك أي رحلة ثانية؟	هل لديك أي رحلة أخرى ؟
السيارة تصدر صاخبا غريبا .	السيارة بطلع صوت غريب وعالي.	السيارة تخرج صوت غريب وعالي.
هذه سبعون دولار .	هاي سبعين دولار.	هذه سبعون دولاراً.
أنا شديد الحساسية للقطط .	أني بتحسس كثير من البسس.	أنا أحس كثيراً من البسس.
لا . قليلاً في الأمام . هناك ، نعم .	لا. شوي لقدام. هناك، إيوه.	لا. بعض الوقت خلف. هناك ، إيوه.
ركن المدخنين ، من فضلك . وشباك بجوار النافذة ، من فضلك .	ركن الشيشانيين، إذا سمحت. وشباك جمب النافذة، إذا سمحت.	ركن الشيشانيين ، من فضلك. وشباك جمب النافذة ، من فضلك.
هل يكلفني دخول هذا المبنى أي أموال ؟	بدفع أي مصاري إذا فتت على هاي العمارة؟	هل يدفع أي ثمن إذا فاتت على هذه العمارة ؟
سأكون هنا حتى التاسعة . يحدوني الأمل أن تتمكن من القبض على المجرم في أقرب وقت ممكن .	راح أظل هون للساعة تسعة. بتمنى إنكم تمسكوا المجرم بأسرع وقت.	سأقيم هنا حتى التاسعة. أتمنى أن تمسكوا المجرم بأسرع وقت.
شكراً لك . من فضلك عاود مرة أخرى .	مشكور. يلا جرب مرة ثانية من فضلك.	شكراً. سوف جرب ثانية من فضلك.
فاتتني محطتي .	راح علي الموقف.	سأتصل بالموقف.
أين يمكنني أن أقيم أثناء الجولة ؟	وين ممكن أسكن خلال الرحلة؟	أين يمكنني أن أقيم خلال الرحلة ؟
إنه لمن دواعي السرور أن أتحدث معك .	إنسريت بالحكي معك.	لقد سررت في التحدث معك.
أي مقاس تريد ؟	شو السايز اللي بدك ياه؟	ما السايز الذي تريد ؟
بالتأكيد ، هل تريد تسريحة متموجة دائما ؟	أكيد، بدك اياه كيرلي دايما؟	بالتأكيد ، هل تريد أن تقوم بذلك بكل تأكيد ؟
إلى اليسار ، من فضلك .	على اليسار، لو سمحت.	على اليسار ، من فضلك.
لقد أتلفت حقيبتي .	دمرت شنتتي.	لقد دمرت حقيبتي.
البيتزا لذيذة . من صنعها ؟	هاي البيتزا زاكية. مين عملها؟	هذه البيتزا جميلة. من عملها ؟
أخشى أن أسأل ، لكن ماذا تعني ؟	بخاف اسأل، بس شو قصدك؟	أظن أن أسأل ، ولكن ماذا عنك ؟
لا ، من فضلك اجلس وانتظر . سأعود بعد قليل .	لا، لو سمحت اقعد واستنى. راح أرجعلك بعد شوي.	لا ، من فضلك انتظر واستنتظر. سأعود لك بعد بعض الوقت.
الكعب مرتفع جداً .	الكعب عالي كثير.	الكعب على ما يرام.
كم سيستغرق إصدار التأشيرة لي ؟	قديش الفيزا بدها وقت عشان تطلع؟	كم من الوقت يستغرق لكي تخرج ؟
لقد تعطلت سيارتي .	خربت سيارتي .	لقد خرجت سيارتي.
كيف أثر الركود على الشركة ؟	شلون أثر الركود عالشركة ؟	كيف أثر الركود في الشركة ؟
توجد رحلات جوية على شركات جال وانا التي تقلع في الساعة العاشرة وخمسة وخمسين دقيقة . ولكن , للأسف كلتا الرحلتين محجوزتان .	في طيارات على شركات جال وانا اللي بتغادر الساعة عشرة وخمسة وخمسين دقيقة. بس، للأسف الطيارتين مفللات.	هناك طيارات على شركات جال وأنا الذي يغادر في العاشرة وخمسين دقيقة. ولكن ، للأسف الطيارتين مفللات.
هل هذا سيفسد ؟	هاذ رح يخرب؟	هل هذا سيخرب ؟
هل يمكنك أن تخبرني بقيمة هذه المكالمة ؟	بتقدر تحكيلي تكلفة هاي المكالمة؟	هل لك أن تخبرني تكلفة هذه المكالمة ؟
من الأفضل أن تضبط المرآة العاكسة للرؤية الخلفية .	أحسن شي تزبط المراية الخلفية.	أفضل شيء أن تزبط المراية الخلفية.
كم أجرة التاكسي حتى هذا الفندق ؟	كم أجرة التكسي لعند الفندق؟	كم أجرة التكسي إلى الفندق ؟
أريد مزيلا لطلاء الأظافر .	بدي أسيتون للمناكير.	أريد أسيتون للمناكير.
ما هي مكونات هذا الطبق ؟	شو مكونات هالصحن؟	ما هي مكونات هذه للصحن ؟
متى ينبغي أن آتي ؟	متى لازم آجي ؟	متى يجب أن آجي ؟
هل يمكن أن تخبرني عن الأماكن الشيقة هنا ؟	ممكن تحكيلي عن الأماكن الحلوة هون؟	هل لك أن تخبرني عن الأماكن الجميلة هنا ؟
حسنا ، اضغط تسعة وصفر واحد واحد ، ثم الكود الخاص بالبلد ورقم الهاتف .	طيب، إكبس تسعة وصفر واحد واحد، وبعدين الكود تبع البلد ورقم التلفون.	حسناً ، اتصل تسعة وصفر واحد واحد ، ثم الكود على البلد ورقم الهاتف.
أعتقد أنك ارتكبت خطأً . الغرفة دفع ثمنها مسبقاً . معي إيصال .	بظن إنك غلطت. الغرفة حاسبت عنها قبل. معي وصل.	أعتقد أنك خطأت. غرفة حاسبت عنها قبل. معي وصل.
هل يمكنك أن تتحرك بهذا الاتجاه ؟	بتقدر تمشي بهالجهة؟	هل يمكنك أن تمشي في هذه الجانب ؟
سيغادر قطارك من الرصيف رقم ثمانية .	رح يطلع قطارك من السكة رقم ثمانية.	سيغادر قطارك من السكة رقم ثمانية.
أريد غرفة أخرى .	بدي غرفة ثانية.	أريد غرفة أخرى.
لماذا يحدث هذا ؟	ليش بصير هاذ ؟	لماذا يحدث هذا ؟
ما الرقم الذي أطلب منه هنا ؟	شو الرقم اللي بطلب منه هون؟	ما هو الرقم الذي أطلب منه هنا ؟
هل يوجد مطعم أرخص قريب من هنا ؟	في مطعم رخيص قريب من هون؟	هل يوجد مطعم رخيص بالقرب من هنا ؟
هل يوجد مطعماً يمكنك أن تزكيه بالقرب من هنا ؟	في مطعم بتنصح فيه قريب من هون؟	هل يوجد مطعم يناسبه بالقرب من هنا ؟
أوبرا ميتروبوليتان .	أوبرا المتروبوليتان.	أوبرا المتروبوليتان.
أين المصعد ؟	وين الأصنصير؟	أين الأصنصير ؟
هل يمكنك أن ترني أشياء أخري ذات تصميمات مختلفة .	ممكن توريني شغلات ثانية بأشكال غير؟	هل يمكن أن تريني بعض الشركات الأخرى في أشكال مختلفة ؟
ليس بمقدورك تغيير وظيفتك بسهولة .	ما بتقدر تغير شغلك ببساطة.	لا يمكنك تغيير عملك ببساطة.
ماذا تسمون هذا بالإنجليزية ؟	شو بتسموه هاذ بالإنجليزي؟	ماذا تسموه هذا بالإنجليزية ؟
سأصل في التاسع من مارس وأغادر في الرابع عشر .	راح أوصل بتسعة ثلاث وراح أروّح بأربعطعش.	سأصل في السابعة ثلاثة وسوف أروّح في الرابعة عشر.
هل ستحدد موعداً للخروج معي ؟	بدك تحدد موعد لتطلع معي؟	هل تريد أن تحدد ميعاد مغادرة معي ؟
لم اسمع بهذا العنوان من قبل بالقرب من هنا .	ما سمعت بهاذ المكان قبل هيك بالمنطقة هون .	لا سمعت هذا المكان قبل ذلك في هذه المنطقة هنا.
سوف أحضر لك العرض الأسبوع القادم .	بدي اجهزلك العرض الاسبوع الجاي.	أريد أن أجهز لك العرض الأسبوع القادم.
صديقي مريض جداً . هل تستطيع أن تطلب دكتور ، من فضلك ؟	صاحبي كثير مريض. ممكن تطلب الدكتور، لو سمحت؟	صديقي مريض جداً. هل يمكنك أن تطلب طبيباً ، من فضلك ؟
هل أخذت تذكرة الحافلة ؟	اخذت تذكرة الباص؟	هل أخذت تذكرة الحافلة ؟
يوجد لدى حوالي ألفي وخمسمائة دولار بالين الياباني .	أنا معي حوالي ألفين وخمسميت دولر بالين الياباني.	أنا معي حوالي ألفين وخمسمائة دولاراً في الين الياباني.
هل يمكنني استئجار مرشداً يتحدث اللغة اليابانية ؟	ممكن أستأجر دليل بسولف ياباني؟	هل يمكنني أن أستأجر دليل بسولف ياباني ؟
هذا بعينه ما كنت أبحث عنه .	هاي بالزبط اللي كنت بدور عليه.	هذا بالضبط ما كنت أبحث عنه.
رقم مقعدي دي اثنا عشر . أين هو ؟	رقم كرسيي دي اثنعش. وين هو؟	رقم مقعدي دي اثنعشر. أين هو ؟
فينس وليندا يريدان أن يبقيا بمفرديهما ، لذا أخشى أنني لا بد أن أبقى هنا هذه الليلة .	فينس وليندا بدهم يظلوا لحالهم، فبخاف انو لازم اظل هون الليلة.	فينس وليندا يظلون على قدمهم ، ولكنني أخشى أنني يجب أن أظل هنا الليلة.
إنها تبعد حوالي تسعة وتسعون ميلا .	هي بتبعد حوالي تسعة وتسعين ميل.	إنها تبعد حوالي تسعة وتسعين ميل.
حسناً ، تم إعادة التأكيد على حجزك .	ماشي، اتأكدنا من حجزك مرة ثانية.	حسناً ، اتأكدنا من حجزك ثانية.
حسناً ، فلنق نظرة عليك .	طيب ، خلينا نطل عليك .	حسناً ، دعنا نطل عليك.
هل يجب على أن أجيب بـ نعم أو بـ لا ؟	لازم اجاوب بـ اه أو بـ لأ ؟	هل يجب أن أقوم بجلوس بـ اه أو بـ لأ ؟
من فضلك ، بدلي شيك المسافرين إلي نقود .	لو سمحت اصرفلي هاد الشك السياحي كاش.	من فضلك اصرف هذا الشك السياحي على نحو دولار.
من فضلك دلني على أرخص وسيلة للذهاب إلى سان فرانسيسكو .	من فضلك دلني على أرخص طريقة حتى أروح على سان فرانسيسكو.	من فضلك دلني على أرخص طريقة للذهاب إلى سان فرانسيسكو.
أريد غرفة مفردة بحمام لقاء ثمانين دولارا ، من فضلك .	بدي غرفة فردية مع حمام بـثمانين دولار, لو سمحت.	أريد غرفة فردية مع حمام بـثمانين دولاراً, من فضلك.
من فضلك ، هل رسمت لي خريطة بسيطة من هنا ؟	من فضلك، بتقدر ترسملي خريطة سهلة من هون؟	من فضلك ، هل يمكنك أن ترسل لي خريطة سهلة من هنا ؟
ليس لدي أية مضارب أو أحذية .	ما عندي لا مظارب ولا أحذية.	لا لدي مظارب ولا أحذية.
أوه ، يبدو أنني افقد شيء ما كل وقت أسافر فيه .	أوه، شكلني بضيع اشي كل مرة بسافر فيها.	أوه ، يبدو أنني أقوم ببعض الشيء كل مرة أسافر فيها.
أجل ، إنها مفتوحة من التاسعة حتى التاسعة .	أها ، هي فاتحة من الساعة تسعة للساعة تسعة.	نعم ، إنها فاتحة من الساعة التاسعة إلى الساعة التاسعة.
سيأتي القطار السريع التالي بعد ساعة .	راح يجي القطار السريع الجاي بعد ساعة.	سأتي القطار السريع القادم بعد ساعة.
مرحبا . كيف حالك ؟	مرحبا . كيف حالك؟	مرحباً. كيف حالك ؟
تاريخ الانتهاء تسعة عشر من مارس تسعة وتسعين .	تاريخ انتهاء الصلاحية تسعطعش من شهر ثلاث التسعة وتسعين.	تاريخ انتهاء الصلاحية تسع عشر من مارس ثلاثة تسعة وتسعين.
هلا احتفظت بهذا لي ؟	ممكن تظبلي هاد؟	هل يمكنك أن تظبي هذا ؟
هل تقبل بالين الياباني ؟	بتوخذ بالين ياباني؟	هل تتقاضى بالين ياباني ؟
من فضلك ، اكتب رقم الغرفة في الخلف .	من فضلك ، اكتب رقم الغرفة بقفى الورقة.	من فضلك ، اكتب رقم الغرفة في هذه الورقة.
هل يمكنك أن تصلح ذلك ؟	بتقدر تصلح هاي؟	هل يمكنك أن تصلح هذه ؟
سيداتي سادتي ، لدينا على متن رحلتنا اليوم مضيفين يتحدثون اليابانية يمكن التعرف عليهم من خلال الشارة التي يلبسونه . إذا كنت تعرف أي شخص يريد مساعدة في الترجمة ، من فضلك دعنا نعرف .	سيداتي وسادتي،برحلتنا اليوم، عنا مضيفين بحكوا ياباني بتعرفوهم من الباجة اللي لابسينها. إذا بتعرف إنه أي حد بحتاج مساعدة بالترجمة، لو سمحت خلينا نعرف.	سيداتي وسادتي ، في رحلتنا اليوم ، لدينا مضيفين يتحدثون اليابانية تعرفهم من الحافلة التي لاستخدامها. إذا تعرف أن أي شخص يحتاج مساعدة في الترجمة ، من فضلك ، دعينا نعرف.
هل يجب أن أدفع الرسم الإضافي عندما أدخل مبنى ؟	لازم أدفع رسوم ثانية بس أفوت عأي مبنى؟	هل يجب أن أدفع رسوم أخرى لكي أدخل أي مبنى ؟
لقد انكسرت السنة .	انكسرت السنة.	لقد انكسرت العام.
تبدو البونساي كهواية شخص هرم .	شكلها البونساي هواية الختيار.	يبدو أن البونساي هواية الاختيار.
لدينا غرفة مزدوجة بحمام بخمسة و ثمانين دولار .	عنا غرفة مزوجة مع حمام بخمسة وثمنين دولار.	لدينا غرفة مزوجة مع حمام بخمسة وثمانين دولاراً.
هل هذه من نوع ليفي خمسة صفر المعتمدة ؟	هاي من نوع ليفي خمسة صفر الأصلية؟	هل هذه من نوع ليفي خمسة صفر الأصلية ؟
هل يمكن أن أبيت عندكم الليلة ؟	بقدر أبات عندكو الليلة؟	هل يمكنني أن أبات لديكم الليلة ؟
هل تود منضدة في المطعم الرئيسي أو في غرفة خاصة يا سيدي ؟	سيدي، بتحب طاولة بالمطعم الرئيسي ولا بغرفة خاصة؟	سيدي ، هل تحب مائدة في المطعم الرئيسي أم في الغرفة الخاصة ؟
مائة بالمائة قطن .	مية بالمية قطن .	مائة في المائة قطن.
إنها لذيذة جداً .	كثير طيبة.	جميلة جداً.
هل أستطيع التحدث مع المدير ؟	بقدر أحكي مع المدير؟	هل يمكنني التحدث إلى المدير ؟
أنا آسف ، هو ليس بالداخل الآن .	أني آسف، هو مش جوا هسا.	أنا آسف ، إنه لا يذهب الآن.
أريد غرفة بسريرين . ما ثمن الغرفة في الليلة ؟	بدي غرفة بتختين. قديش تكلفة الغرفة بالليل؟	أريد غرفة بتختين. كم تكلفة الغرفة الليلة ؟
ابقى على الخط وانتظر لحظة من فضلك .	خليك على الخط و استنى شوي من فضلك.	خذ الخط. استنتظر قليلاً من فضلك.
هل يمكنني أن أرسل أي ميل واحد فقط قيمته دولار .	بقدر أبعث أي ميل واحد تكلفته بس دولر؟	هل يمكن أن أرسل أي ميل واحد تكلفته فقط دولاراً ؟
من أين تغادر الحافلات لمشاهدة المعالم ؟	من وين بتطلع الباصات حتى نشوف المناظر؟	من أين تخرج الحافلة لكي نشاهد المناظر ؟
هل لديك ألوان أخرى من هذا ؟	عندك ألوان ثانية من هاذ؟	هل لديك ألوان أخرى من هذا ؟
اذهب إلى نادي رياضي كل يومين .	روح عالجيم كل يومين.	ذهب إلى معالجة كل يومين.
تم الفصل بين مقاعدنا .	صار فصل بين كراسينا.	لقد حدث فصل بين كراسينا.
هل لك أن تخبرني عن مكان تحليق الطائرة الآن ؟	بتقدر تحكيلي وين بطير الطيارة هسا؟	هل لك أن تخبرني أين يطير الطائرة الآن ؟
كيف ترغب في إجراء المكالمة ؟	شلون بدك تعمل المكالمة؟	كيف تريد أن تقوم بعمل المكالمة ؟
أفهم ذلك . أحاول استئجار سيارة سيتروين .	بفهم هالاشي. بحاول أستأجر سيارة سيتروين.	أفهم هذا. أحاول استئجار سيارة سيتروين.
هذه هي الغرفة اثنا عشر صفر سبعة .	هاي هي الغرفة اثنعش صفر سبعة.	هذه هي الغرفة اثنانش صفر سبعة.
هل لك أن تأخذ هذا ، من فضلك ؟	ممكن توخذ هاذ، لو سمحت؟	هل يمكنك أن تأخذ هذا ، من فضلك ؟
كم عمر هذا الصبي ؟	قديش عمر هالولد؟	كم عمر هذا الولد ؟
قارب مع مرشد ، من فضلك .	قارب مع مرشد ، لو سمحت.	قارب مع مرشد ، من فضلك.
القهوة غير محسوبة .	القهوة مش محسوبة؟	هل القهوة غير محسوبة ؟
لقد أضعت تذكرة الطيران الخاصة بي .	انا ضايع تذكرة الطيران حقتي.	أنا ضايع تذكرة الطيران حقتي.
نعم , في بادئ الأمر ، اغسليها على منفصلة .	أيوة, بالأول, غسليها لحالها.	نعم, أولاً ، غسلها لحظة.
هل يمكنني أن التقط بعض الصور ؟	ممكن اوخذ شوية صور؟	هل يمكنني الحصول على بعض الصور ؟
هلا فتحت هذه الحقيبة ، من فضلك ؟ ماذا يوجد هنا .	بتقدر تفتح هاي الشنطة، لو سمحت؟ شو لقيت فيها هون؟	هل يمكنك أن تفتح هذه الحقيبة ، من فضلك ؟ ماذا وجدت هنا ؟
ما نوع هذه الموسيقى ؟	شو نوع هاي الموسيقى؟	ما نوع هذه الموسيقى ؟
أريد بعض الكريم للأيدي .	بدي شوية كريم للإيد.	أريد بعضاً من الكريم للإيد.
مائة غير المدخنين من فضلك .	مية غير اللي بدخنوا، لو سمحت.	مائة من السجائر ، من فضلك.
من فضلك أعطني بعض الفكة .	لو سمحت اعطيني شوية فراطة.	من فضلك أعطني بعض الفاكهة.
بالتأكيد . لدينا بعض الماركات الأمريكية الأصلية الجميلة . للكتب .	أكيد. عنا شوية ماركات أمريكية أصلية حلوة. للكتب.	بالتأكيد. لدينا بعض الماركات الأمريكية أصلية جميلة. للكتب.
لدي وصولها ، سوف ندفع ثمن شحنها إلى عنوان منزلك .	لما توصل. راح ندفع حق الشحن لعنوان بيتك.	عند الوصول. سندفع ثمن الشحن إلى عنوان بيتك.
إنها مشغولة .	هيه مشغولة.	إنها مشغولة.
سرقت حقيبتي في الشارع .	انسرقت شنتي بالشارع.	لقد سرقت حقيبتي في الشارع.
لم تصنع هذه باليابان ، أليس كذلك ؟	ما صنعت هاي باليابان، صح؟	لا صنعت هذه في اليابان ، أليس كذلك ؟
سيبدأ الصعود على متن الطائرة الساعة الرابعة والنصف لذلك من فضلكم كونوا هناك قبل هذا الموعد .	رح يبلش الصعود على الطيارة الساعة أربعة ونص . لذالك لو سمحتو كونو هون قبل هذا الوقت.	سيغادر الصعود على متن الطائرة في الساعة الرابعة والنصف. ولذا من فضلك انتظر هنا قبل هذا الوقت.
نحن هنا لمدة يوم .	إحنا هون لمدة يوم.	نحن هنا لمدة يوم.
لقد فقدت شيكاتي السياحية .	ضيعت الشيكات السياحية تبعتي.	لقد فقدت الشيكات السياحية تبعتي.
ما أنواع الخضراوات الموجودة لديك ؟	شو هي الخضرة اللي عندك؟	ما هي الخضرة التي لديك ؟
يجب أن أنتقل إلى عربة مكيفة واحد صفر صفر . هل هذا ممكن ؟	بدي انتقل لعرباية مكيفة واحد صفر صفر. ممكن؟	أريد أن أذهب إلى عربة مكيفة واحد صفر صفر. هل يمكن أن أذهب إلى عربة مكيفة واحد صفر صفر. هل ؟
نعم ، حجز لمدة ستة أيام من فضلك ، بدء من الثالث والعشرين من يوليو .	ايوه، حجز لست أيام لو سمحت، ببلش من ثلاث وعشرين ستة.	نعم ، حجز لمدة ثلاثة أيام من فضلك ، يبدأ من ثلاثة وعشرين ستة.
من أي مكان يمكنني أن أغير القطار الذي يوصلني إلى إدنبره ؟	منين بقدر أغير القطار اللي بوصلني لادنبرة؟	من أين يمكنني تغيير القطار الذي يصلني إلى لندن ؟
أكثر منتجاتنا بيعت عبر السنوات الأربع الماضية هي الآلة الناسخة طراز أ . أكس أربعة خمسة صفر .	أغلب اللي بعناه من منتجاتنا على مرّ الأربع سنين اللي فاتت هي الآلة الناسخة، طراز أ . أكس أربعة خمسة صفر.	أغلب ما يقدم من منتجاتنا على مرّ الأربع سنوات الماضية هي الآلة الناسخة ، طراز أ. أكس أربعة خمسة صفر.
آسف سأعود لاحقاً .	آسف. راح أرجع بعدين.	آسف. سأعود بعد ذلك.
هل يتحتم عليك كثيراً أن تعمل حتى ساعة متأخرة ؟	بتظطر كثير تشتغل لوقت متأخر؟	هل تعتقد أنك تعطر جداً للعمل لوقت متأخر ؟
هل لديك نفس هذا التصميم بكعب أعلى ؟	عندك نفس هاذ الديزاين بس كعب أعلى؟	هل لديك نفس هذه الديزاين لكن كعب أعلى ؟
التكلفة ، من فضلك . هل تقبلون بطاقة فيزا ؟	الحساب ، لو سمحت. يتقبلو بطاقة فيزا؟	الحساب ، من فضلك. هل يتقبلون بطاقة فيزا ؟
من فضلك استلق هنا .	لو سمحت، اتمدد هون.	من فضلك ، انتظر هنا.
اسمي ميتشكو تاناكا ، ورقم الرحلة إلى طوكيو هو خمسة ، صفر ، واحد .	اسمي ميتشكو تاناكا، ورقم الرحلة لطوكيو هو خمسة، صفر، واحد.	اسمي ميتشكو تاناكا ، ورقم الرحلة إلى طوكيو هو خمسة ، صفر ، واحد.
آه ، كلا . من فضلك أسرع . إننا متأخرون .	آه، لأ. لو سمحت عجل، إحنا متأخرين.	آه ، لا. من فضلك ، نحن متأخرين.
ما هي أفضل جولة حتى أرى أشهر الأماكن ؟	شو هي أحسن رحلة عشان أشوف أشهر الأماكن؟	ما هي أفضل رحلة لمشاهدة أشهر الأماكن ؟
حسنا . مقعدان من فضلك .	ماشي. كرسيين لو سمحت.	حسناً. مقعدين من فضلك.
أظن أنه بديع المنظر .	بظن انه منظره صاير حلو.	أعتقد أن هذا يبدو جميلاً.
بنطلون أخر ؟	بنطلون ثاني؟	هل بنطلون آخر ؟
سأجرب بعضاً من الشراب المثلج .	بدي أجرب شوي من العصير المثلج.	أريد أن أجرب بعض العصير المثلج.
هل هذا هو الطريق الصحيح إلى المحطة المركزية ؟	هاد الطريق الصح للمحطة الرئيسية؟	هل هذا الطريق الصحيح إلى المحطة الرئيسية ؟
أريد شراء تذكارات لأصدقائي . أيمكن أن تُوصي ببعض منها ؟	بدي أشتري هدايا تذكارية لأصحابي. ممكن تنصحني بإشي؟	أريد شراء هدايا تذكارية لأصدقائي. هل يمكنك أن تساعدني في شيء ؟
أريد الحصول على تأمين .	بدي تأمين.	أريد تأمين.
آوه إلقاء نظرة على صندوقك .	واو أنا حاب أشوف صندوقك.	أوه أنا أريد أن أرى صندوقك.
إنها أربعة عشرة .	هاي أربعطعش.	هذه أربعة عشر.
سأنتظر حتى يتاح الجلوس في التراس .	رح أستنا لحتى يصير الجلوس بالتراس ممكن.	سننتظر حتى يصبح الجلوس في الردهة.
يمكنك أن تمكث في منزلي .	ممكن تفضل تقعد ببيتي.	هل يمكنك أن تفضل أن تجلس في منزلي ؟
هذا , من فضلك .	هاظ ، لو سمحت.	هذا ، من فضلك.
من فضلك نظف هذا المعطف .	لو سمحت نظف هاظا الكبوت.	من فضلك نظف هذا الكبوت.
شراب الشمام كحلاء ، من فضلك .	عصير الشمام كحلو ، لو سمحت.	عصير الشمام حلو ، من فضلك.
أخطط لتعلم الجولف .	بفكر أتعلم جولف.	أفكر في تعلم جولف.
كان هذا مكسوراً بالفعل عندما فتحت الطرد .	كان هاذ مكسور فعلاً لما فتحت الطرد.	كان هذا مكسور حقاً عندما فتحت الطرد.
توقفت ساعتي .	ساعتي وقفت.	ساعتي وقفت.
أجل . إنها مشكلة تخلص من الفضلات .	أيوة. هاي مشكلة كب الزبالة.	نعم. هذه مشكلة كب الزبالة.
هناك محل لبيع الزهور في الطريق .	في محل ورد بالطريق .	هل يوجد محل ورد في الطريق ؟
هل السيدات يقبلن هذا ؟	الستات بقبلن بهاذ؟	هل الستات يقبلون هذا ؟
هل يمكننا ترك أشياءنا ما عدا الأشياء القيمة في الحافلة ؟	بنقدر نخلي اغراضنا هون، ماعيدا الأشياء الغالية، في الباص؟	هل يمكننا أن نقوم بحفظ أمتعتنا هنا ، بما فيها الأشياء الرائعة ، في الحافلة ؟
بمقدورك أن ترى واحداً عند " كارينجي هول " .	بامكانك تشوف واحد بقاعة كارنيجي.	هل يمكنك أن ترى واحد في قاعة كارنيجي ؟
آسف جدا ، لكني أود تأجيل الميعاد .	آسف كثير، بس بدي أجل الموعد .	آسف جداً ، ولكنني أريد أن أجل الموعد.
أجل , يمكننا القيام بخدمتك بداية من السابعة .	اها، منقدر نخدمك من الساعة السابعة.	حسنا ، يمكننا أن نقوم بعمل اتصالك من الساعة السابعة.
على أي جانب من ميدان الاتحاد هي ؟	على اي جهة من دوار الاتحاد بتكون؟	هل على أي جهة من دوار الاتحاد تكون ؟
أريد بعضاً من كريم التنظيف .	بدي شوية كريم تنظيف.	أريد بعض الكريم التنظيف.
من فضلك لفها كل على حدة .	من فضلك غلفها كل وحدة لحالها .	من فضلك غلفها كل واحدة على حدة.
كود المنطقة هو ثلاثة . ورقم الهاتف هو اثنان ثلاثة أربعة ثلاثة أربعة صفر صفر .	رقم المنطقة ثلاثة. ورقم التلفون اثنين ثلاثة أربعة ثلاثة اربعة صفر صفر.	رقم المنطقة ثلاثة. ورقم الهاتف اثنان ثلاثة أربعة ثلاثة اربعة صفر صفر.
كم عدد المرات التي سأغير فيها القطارات للوصول إلى هناك ؟	كم قطار رح اركب عشان أوصل هناك؟	كم قطار سأكب لكي أصل إلى هناك ؟
هل تريد تسوية الفاتورة الآن ؟	راح تحاسب عالفاتورة هسا؟	هل ستحاسب في الفاتورة الآن ؟
هل هذه السيارة الأجرة متاحة ؟	هاي التكسي فاضية؟	هل هذه التكسي فاضية ؟
هل يمكن أن تدلني على بعض الفنادق الرخيصة والنظيفة ؟	بصير ادلني عبعض الفنادق الرخيصة والنظيفة؟	هل يمكن أن أدعوني إلى بعض الفنادق الرخيصة والنظيفة ؟
أنا مع بعض الأصدقاء .	أنا مع شوية صحاب.	أنا مع بعض الصديقين.
لشخصين عند الساعة السابعة , الاسم وتاناب .	لشخصين الساعة سبعة. الاسم وتاناب.	لشخصين الساعة السابعة. الاسم وتاناب.
ما هو الإجمالي ؟	شو الإجمالي؟	ما هو الإجمالي ؟
أين يمكنني أن أشتري زلاجات وأحذية ؟	من وين بقدر اشتري زلاجات و أحذية؟	من أين يمكنني شراء زلاجات وأحذية ؟
ما وجه الاختلاف بين منتجك ومنتج منافسيك ؟	شو الفرق بين منتجك ومنتج الناس اللي بتنافسك؟	ما هو الفرق بين منتجك ومنتج الناس التي تفضلك ؟
أين تعلم السيد جونز اللغة اليابانية ؟	وين السيد جونز تعلّم اللغة اليابانية؟	أين السيد جونز تعلم اللغة اليابانية ؟
لا يمكنني وضع الأمتعة تحت المقعد . هل لك أن تحتفظ بها لأجلي من فضلك ؟	أنا ما بقدر أحط شنطي تحت المقعد. ممكن تخبيلي ياهم لو سمحت؟	أنا لا أستطيع أن أضع حقائبي تحت المقعد. هل يمكنك أن تخبرني من فضلك ؟
هل يمكنك أن تستدعي موظفاً يتحدث اليابانية ؟	ممكن تنادي موظف بحكي بالياباني؟	هل يمكنك أن تنادي موظف يتحدث اليابانية ؟
سوف أبلغ الشرطة بذلك .	راح أبلغ الشرطة بهاظ الإشي.	سأبلغ الشرطة بهذا الأمر.
عيد ميلادك اقترب .	عيد ميلادك قرب.	عيد ميلادك قد قرب.
تعثر صديقي والتوي كاحله .	صاحبي وقع والتوى كاحله.	صديقي وقع ووقع على قاع.
نعم , أعتقد ذلك .	اه، بتوقع هيك.	نعم ، أعتقد ذلك.
اتجاه واحد .	اتجاه واحد.	اتجاه واحد.
هلاّ جعلت توقيعك هنا والحروف الأولى من اسمك هنا .	هات خلي توقيعك هون وأول حروف اسمك هون.	اتصل بتوقيعك هنا وأول حروف اسمك هنا.
أين يمكن أن أوقف سيارتي ؟	وين ممكن أقف سيارتي؟	أين يمكنني أن أقف سيارتي ؟
سأغلق الآن . شكراً على انتباهكم .	رح أسكر هسا. شكراً على انتباهكو.	سأسكر الآن. شكراً على انتباهكم.
اللعنة . اللعنة . اللعنة . اللعنة . لقد كبرت معتاداً على وجهها .	يلعن. يلعن. يلعن. يلعن. أنا تعودت كثيرعلى وجهها.	يلعن. يلعن. يلعن. يلعن. أنا تعودت كثيراً على وجهها.
سنراك في الغد .	رح نشوفك بكرة.	سنقابلك غداً.
عندي ثلاثة أطفال .	عندي ثلاث ولاد.	لدي ثلاثة أولاد.
نعم ، هي ، لأنك تستطيع أن ترى العلم أمام مكتب البريد .	صح، هي . لأنه بتقدر تشوف العلم قدام مكتب البريد.	حسنا ، هي. لأنه يمكنك أن ترى العلم خلف مكتب البريد.
هل تستطيع إنزال أمتعي إلى الردهة غداً صباحاً ؟	ممكن تنزل أغراضي على الردهة بكرة الصبح؟	هل يمكنك أن تنزل أمتعتي إلى الردهة غداً ؟
أربع ليالي .	أربع ليالي.	أربع ليالي.
دقيقة فقط ، من فضلك .	ديقة بس، لو سمحت.	ديقة فقط ، من فضلك.
هل ستواجهني أية صعوبات في الجمارك ؟	راح ألاقي أي صعوبة بالتعامل مع الجمارك؟	هل سأجد أي صعوبة في التعامل مع الجمارك ؟
هلا أخبرتني كيفية تعديلها من فضلك ؟	ممكن تحكيلي كيف اعدلها لو سمحت؟	هل لك أن تخبرني كيف أرسلها من فضلك ؟
حسنا ، لا أعلم بعد لكنني سوف أحاول بالتأكيد .	ماشي، مش عارف لحد الآن بس رح أحاول أكيد.	حسناً ، لا أعرف حتى الآن لكن سأحاول حقاً.
موعده المقرر هو الثامنة والنصف مساءْ بالتوقيت المحلي .	موعده هو الساعة ثمنية ونص المسا بالتوقيت المحلي.	موعده هو الساعة الثامنة والنصف مساءاً في التوقيت المحلي.
هل يمكن أن تضع حقيبة السفر هذه في صندوق السيارة .	ممكن لو سمحت تحطلي شنة السفر هاي بالطبون ؟	هل يمكن أن تحطل حقيبة السفر هذه في الطبون ؟
هذه ليست تفاحة ولكنها خوخة .	هاي مش تفاحة هاي خوخة.	هذه لا تفاحة هذه الخوخة.
إذا كان بالإمكان ، لم أكن لأخلع السنّة .	اذا ممكن، أنا بفضل ما تقلع السن.	من فضلك ، أنا أفضل أن لا تقلع السن.
علي أن أفحص ذلك مع زوجتي .	لازم أشوف الموضوع مع مرتي.	يجب أن أرى الأمر مع صديقي.
لا أعتقد أن هذه السكينة نظيفة . أيمكنك أن تُحضر لي واحدة أخرى ؟	أنا ما بظن إنه هاي السكينة نظيفة. بتقدر تجبلي وحدة تانية؟	أنا لا أظن أن هذه السكينة نظيفة. هل يمكنك أن تجبلي واحدة أخرى ؟
املأ البنود الآتية في بطاقة التسجيل .	املي البنود اللي جاية على كرت التسجيل.	أملي البنود التي تقدمة على كرت التسجيل.
ما الذي يمكن أن أراه في هذه الجولة ؟	شو بقدر أشوف بهاي الرحلة؟	ماذا يمكنني أن أرى في هذه الرحلة ؟
هل هذا المتبل حار ؟	هاظ المتبل حار؟	هل هذا المتبل حار ؟
هذه كلها مطبوعات .	هاي كلها مطبوعات.	هذه كلها مطبوعات.
هذه هديه لصديق .	هاي هدية لرفيقي.	هذه هدية لرفيقي.
أراهن بخمسة دولارات .	براهن بخمس دولارات .	أراهن بخمس دولارات.
هل توجد أية جولة صباحية ؟	في أي جولات صباحية؟	هل توجد أي جولات صباحية ؟
سنمكث .	راح نظل.	سنضل.
هل توجد غرفة استراحة عامة بالقرب من هنا ؟	في غرفة استراحة عامة جنبنا هون؟	هل توجد غرفة استراحة عامة جنبنا هنا ؟
آسف ، لقد تحققت من إدارة الخدمة وإدارة المفقودات ولم أجدها عندهم .	بعتذر، تأكدت من إدارة الخدمة وإدارة المقودات وما لقيتها عندهم.	أشعر بالأسفاظ ، لقد تأكدت من إدارة الخدمة وإدارة المقودات ولم تجدها لديهم.
هل قلت لي كيف أذهب إلى المتحف ؟	قلتلي كيف بروح على المتحف؟	هل قلت كيف أذهب إلى المتحف ؟
لا أريد إنفاق أكثر من عشرين دولاراً .	ما بدي أصرف أكثر من عشرين دولار.	لا أريد أن أصرف أكثر من عشرين دولاراً.
هذا المكان مكتظ بالناسب ، أليس كذلك ؟	هاظ المكان معبى ناس، مش هيك؟	هذا المكان معبى ناس ، ليس كذلك ؟
سأحضر المدرسة الصيفية بجامعة هاواي .	رح أداوم بالمدرسة الصيفية بجامعة هاواي.	سأقيم في المدرسة الصيفية في جامعة هاواي.
من فضلك اعطني تصريحاً سارياً لمدة أسبوع .	لو سمحت أعطيني اذن لمدة أسبوع.	من فضلك أعطني أذن لمدة أسبوع.
ما هذا من فضلك ؟	شو هاظ لو سمحت؟	ما هذا من فضلك ؟
سأحتاج إلى بطاقة ائتمان .	راح أحتاج الفيزا .	سأحتاج إلى الفيزا.
إذن دعنا نبطنها من الداخل .	معناته خلينا نحشيها من جوا.	لذلك دعنا نأكلها من داخلنا.
هل هذه محطة قطار سريع ؟	هاي محطة اكسبريس؟	هل هذه محطة أكسبريس ؟
من ثمانية إلى اثنى عشر من فضلك .	من ثمانية ل اثنعش لو سمحت.	من ثمانية إلى اثنان ، من فضلك.
أود قياس بذلة السباق الخاصة بي .	بدي اقيس بدلة السباق تبعتي.	أريد أن أقيس بدلة السباق تبعتي.
لقد طلبته منذ وقت طويل .	طلبته من زمان.	طلبته من وقت طويل.
أين الحمام ؟	وين الحمام؟	أين الحمام ؟
اليابانيون لا يأخذون إجازات طويلة .	اليبانيين ما بيوخذو عطل طويلة.	اليبانيين لا يأكلون عطل طويلة.
هاهي .	هيها .	إنها.
أنها مناسبة تماما .	زابطة تماما.	زجاجة تماما.
مرحبا . هذه هي الخطوط الجوية المتحدة .	مرحبا . هاي هي الخطوط الجوية المتحدة .	مرحباً. هذه هي الخطوط الجوية المتحدة.
أعيش في شقة إيجارها ثمانون ألف ين في الشهر .	بعيش بشقة، الإجارتها ثمانين ألف ين بالشهر.	أقيم في شقة ، قيمتها ثمانين ألف ين في الشهر.
هل هناك أماكن شاغرة بالنسبة لرحلة الخميس ؟	في أماكن فاظية برحلة يوم الخميس؟	هل توجد أماكن فاظية في الرحلة يوم الخميس ؟
أعرف نادي قديم لموسيقى الجاز بوسط البلد .	بعرف نادي قديم لموسيقى الجاز بوسط البلد.	أعرف نادي قديم لموسيقى الجاز في وسط المدينة.
هل انعطف يساراً ؟	بدي ألف يمين؟	أريد أن ألف يميناً ؟
أحبه فعلاً .	بحبه فعلا.	أحب فعلاً.
من فضلك احفظ هذه الحقائب في محتجز الجمارك .	لو سمحت خلي هالشنتات بالجمارك.	من فضلك ضع هذه الحقائب بالجمارك.
هل يمكنني استخدام إِشارة ضوئية ؟	ممكن استعمل إشارة ضوئية؟	هل يمكنني الاستخدام إشارة ضوئية ؟
أعمل في شركة نشر .	بشتغل بشركة نشر.	تعمل في شركة نشر.
اتجه يساراً في هذا الشارع ثم انعطف عند أول منعطف يمين .	روح يمين بهالشارع وبعدين اتوجه يمين عند اول منعطف.	خذ يميناً في الشارع وبعد توجه يميناً عند أول منعطف.
بالفعل لدي أخبار . أنا سأتزوج .	فعلياً، عندي أخبار. أنا بدي أجوز.	فعلاً ، لدي أخبار. أنا أريد أن أجوز.
واحد هامبرجر وواحد شيز برجر ، من فضلك .	واحد همبرقر وواحد شيز برقر، لو سمحت.	واحد همبرقر وواحد شيز برقر ، من فضلك.
أوه ، آسف . كانت هناك مشاكل ونحن نقوم بحلها ، هل تتفضل بالانتظار لمدة ثلاثين دقيقة ؟	أووه، أنا آسف. كان في مشاكل منحلها. ممكن تستنى لثلاثين دقيقة؟	نعم ، أنا آسف. كان هناك مشاكل منحلها. هل لك أن تنتظر لمدة ثلاثين دقيقة ؟
كم عددها ؟	كم عددها ؟	كم عددها ؟
و هو كذلك . سأوصلك إلى هناك .	و هو هيك . رح اوصلك لهناك.	و هو كذلك. سأصلك إلى هناك.
أريد فندق أرخص قليلاً .	بدي فندق أرخص شوي.	أريد فندق أرخص قليلاً.
الأجدر بك أن تكف عن ذلك .	أحسنلك تبطل هالاشي.	أفضل لك أن تبطل هذا.
هل أي من المتاجر الكبيرة به يعمل الآن ؟	في أي مول فاتحة هسه؟	هل يوجد أي مول فاتحة هذه الليلة ؟
كم تستغرق حتى تصبح متاحة .	قديش بدها حتى تصير فاظية .	كم تستغرقها حتى تصير فاظية ؟
معذرة . أريد أن أطلب طلب .	معلش . بدي أطلب طلب .	معذرة. أريد أن أطلب طلباً.
عندنا حفلة مساء الجمعة . لماذا لا تنضم لنا ؟	عنا حفلة يوم الجمعة بالليل. ليش ما تيجي معنا؟	لدينا حفلة يوم الجمعة الليلة. لماذا لا تحضر معنا ؟
كيف أستقلها ؟	كيف اركبهاا؟	كيف اركبها ؟
هل هي جولة يوم كامل ؟	هي الرحلة ليوم كامل؟	هل هي الرحلة لمدة يوم كامل ؟
في أي وقت يمكنني مغادرة الفندق ؟	بأي ساعة ممكن أعمل خروج من الفندق؟	في أي وقت يمكنني القيام بعمل خروج من الفندق ؟
أحضر لي بعض من الجبن المبشور .	هاتلي شوي من الجبنة المبروشة.	هذا بعض من الجبنة المبروشة.
هل لديك أحذية حريمي عند أصابع القدم ؟	عندك كنادر ستاتي مفتوحة من عند الأصابع؟	هل لديك كنادر ستاتي مفتوحة من عند الأصابع ؟
هذه كبيرة جداً .	هاي كثير كبيرة.	إنها كبيرة جداً.
نبيذ غير حلو ، من فضلك .	واين بدون سكر، لو سمحت.	أين بدون سكر ، من فضلك.
تبلغ الميزانية أقل من ألف دولار .	الميزانية أقل من ألف دولار.	الميزانية أقل من ألف دولار.
إنها معطلة . هل تستطع فحص آلة التصوير هذه ؟	هاي معطلة. بتقدر تشيّك على آلة التصوير هاي؟	هذه معطلة. هل لك أن تقوم بتصوير آلة التصوير هذه ؟
لقد كان هناك حادث مرور .	كان في حادث سير.	كان هناك حادث سير.
إجمالي سكان اليابان حوالي مائة وثلاثين مليوناً .	العدد الكلي لسكان اليابان حوالي مية وثلاثين مليون.	العدد الكلي لسكان اليابان حوالي مائة وثلاثون مليون.
أي نوع من الملابس ؟	أي نوع من الأواعي ؟	أي نوع من الأمتعة ؟
في أي مجال كان من قبل ؟	بأي مجال هو كان قبل؟	في أي مجال كان قبل ؟
كم تتكلف الليموزين للذهاب إلى وسط المدينة ؟	قديش تكلف الليموزين عشان نروح عوسط البلد؟	كم تكلف الليموزين للذهاب إلى وسط المدينة ؟
الاسم هو جورو موتوياما . والرقم هو صفر ثلاثة ثلاثة اثنان ستة واحد اثنان أربعة تسعة خمسة .	الاسم هو جورو موتوياما . والرقم هو صفر ثلاثة ثلاثة اثنان ستة واحد اثنان أربعة تسعة خمسة .	اسم هو جورو موتوياما. والرقم هو صفر ثلاثة ثلاثة اثنان ستة واحد اثنان أربعة تسعة خمسة.
لا ، ولكن شكراً لك . إنني أشعر بتحسن .	لا، بس شكرًا هونيك. أنا حاسس انو صرت أحسن.	لا ، لكن شكراً هونيك. أنا أشعر أنني لقد حدثت أفضل.
هل لك أن نبدل مقاعدنا من فضلك ؟	ممكن نبدل كراسينا لو سمحت؟	هل يمكننا تغيير مقعدنا من فضلك ؟
هل هناك مكان يتم فيه عزف الموسيقي الريفية ؟	ما في أي مكان بعزف ألحان ريفية؟	هل يوجد أي مكان لمشاهدة ألحان ريفية ؟
هلا أخبرتني قبل أن نصل إلى درهام ؟	بصير تخبرني قبل ما نوصل لـ درهام؟	هل يمكن أن تخبرني قبل أن نصل إلى درهام ؟
ظل سائراً عبر هذا الممر , وستجدها على الجانب الأيمن .	ظل ماشي بالممر هاذ , و رح تلاقيها عالجهة اليمين.	ظل على ما يرام في الممر هذا ، وستجدها في منطقة اليمين.
أشعر بصداع .	بحس بصداع.	أشعر بصداع.
عامل الصيانة سيصعد في الحال .	عامل الصيانة راح يطلع مباشرة.	عامل الصيانة سيغادر فوراً.
هل تمانع في جلوسي هنا ؟	بتمانع لو اقعد هون؟	هل تتمنى لو أقعد هنا ؟
لقد قمت بزيارة البحيرات الكبرى لأول مرة .	هاي أول مرة بزور البحيرات الكبرى.	هذه أول مرة في زور البحيرات الكبرى.
أصبت بالتهاب في الحلق .	التهب حلقي .	التهب حلقي.
نسافر جواً ثلاث مرات في الأسبوع ، أيام الثلاثاء والجمعة والسبت .	بنسافر بالطيارة ثلث مرات بالأسبوع، الثلاثاء، الجمعة والسبت.	نسافر بالطائرة ثلاث مرات في الأسبوع ، الثلاثاء ، الجمعة والسبت.
نعم . أيقظني من النوم بعد ثلاثة ساعات , من فضلك .	أيوة . صحيني من النوم بعد ثلاث ساعات, لو سمحت.	نعم. لقد قضيت من النوم بعد ثلاث ساعات, من فضلك.
إلى أين يجب علي أن أنقل ؟	لوين لازم أحول؟	من أين يجب أن أحول ؟
لا أعرف كثيراً عن النبيذ ؟ ماذا يناسب هذا الطبق ؟	أنا ما بعرف كثير بالواين. شو بنفع مع هاذ الأكل؟	أنا لا أعرف كثيراً في الواين. ماذا يفعل مع هذا الطعام ؟
وللشرب ؟ .	بتشرب إشي ؟ .	هل ترغب في شيء ؟
نعم ، هذا لا يشمل الوجبات .	أيوة، هاذ ما بشمل الأكل.	نعم ، هذا لا يشمل الطعام.
قمة جبل " فوجي " هي اعلي قمة جبلية في اليابان حيث يبلغ ارتفاعها ثلاثة آلاف وسبعمائة وستون مترا .	جبل فوجي هو أعلى قمة باليابان على ارتفاع ثلاثة ألاف وسبعمية وستين متر.	جبل فوجي هو أعلى قمة في اليابان على ارتفاع ثلاثة ألاف وسبعة مائة وستين متراً.
هل يمكن أن ترسل أحدا ؟	ممكن تبعت حدا؟	هل يمكن أن تبعت شخص ؟
هل من الممكن أن تفصل أكثر ؟	يتقدر توضح أكثر ؟	هل يمكنك أن تشرح أكثر ؟
أريد واحدة حديثة .	بدي وحدة جديدة.	أريد واحدة جديدة.
حسنا ، ولكن ليس منطقة المقاعد المكشوفة . فاليوم شديد الحرارة .	طيب ، بس مش على مكان الكراسي المكشوفة. اليوم كثير شوب.	حسناً ، ولكن ليس على مكان النافذة المكشوفة. اليوم كثير الشوب.
سأرسلها لك ، لذا من فضلك انتظر هنا .	راح أبعثها الك، عشان هيك استنى هون لو سمحت.	سأرسلها لك ، لذلك استنتظر هنا من فضلك.
أخشى أن يكون هناك خطأ في الفاتورة .	خايف يكون في غلط بالفاتورة.	أخشى أن يكون هناك خطأ في الفاتورة.
هذا بارد إلى حد ما . هل يمكن أن تقوم بتسخينه ؟	هاظا بارد شوي. ممكن تسخنه؟	هذا بارد قليلاً. هل يمكن أن تسخنه ؟
هلا راقبت حقيبتي من فضلك ؟	ممكن تراقبلي شنتي ، لو سمحت؟	هل يمكنك أن تراقبني ملابسي ، من فضلك ؟
لا امتلك أي نقود .	ما معي مصاري.	لا معي نقود.
أريد عامل تشغيل يتحدث اليابانية من فضلك .	بدي شغيل بيحكي ياباني لو سمحت.	أريد شغيل يتحدث اليابانية من فضلك.
يبدو أنها نادرة جداً .	شكلها نادرة كثير.	يبدو أنها نادرة جداً.
إنني على يقين أن المجرم قريب .	أنا متأكد إنه المجرم قريب.	أنا متأكد أن المجرم قريب.
أجل ، أظن أني سوف أنظر .	ايوا، بظن إني رح اطلع.	نعم ، أعتقد أنني سأخرج.
هل يوجد أحد يستطيع العزف على البيانو ؟	في أي حدا بعرف يعزف عالبيانو؟	هل يوجد أي شخص يعرف أن يعزف على البيانو ؟
لستُ معتمداً قانونياً .	أنا مش مؤهل.	أنا لا أجيد.
هل يمكنك أن توصل أمتعتي إلى الغرفة ؟	ممكن توصل اغراضي للغرفة؟	هل يمكنك الوصول إلى أمتعتي إلى الغرفة ؟
هل الشوارع الخلفية خطر ؟	الشوارع الخلفية خطرة ؟	هل الشوارع الخلفية خطيرة ؟
هل لك أن توقظني في تمام السادسة من فضلك ؟	بتقدر تصحيني الساعة ستة، لو سمحت؟	هل يمكنك أن تنتظرني في الساعة السابعة ، من فضلك ؟
أشعر بحالة سيئة وغثيان .	حاس بلعية ووظعي زفت.	أشعر بالألم وألم.
لقد اتصلت منذ ثلاثة أيام بخصوص حقيبة ضائعة .	اتصلت من ثلاث أيام عشان شنتة ظايعة.	اتصلت من ثلاثة أيام لحصول على حقيبة ظايعة.
بضع دقائق أخرى من فضلك .	كم دقيقة كمان اذا سمحت.	كم دقيقة أخرى من فضلك.
لم أدرك الرحلة رقم عشرون المتجهة إلى سان فرانسيسكو .	ما لحقت الرحلة رقم عشرين اللي رايحة عسان فرانسيسكو.	لا زالت الرحلة رقم عشرين المتجهة إلى سان فرانسيسكو.
آه ، عندك ؟ بالتأكيد إن لديك تشكيلة كبيرة .	أها، عندك؟ طبعا إنت عندك تشكيلة كبيرة.	نعم ، هل لديك ؟ طبعا أنت لديك تشكيلة كبيرة.
بطريقة أبطأ ، من فضلك .	بشكل أبطأ ، لو سمحت.	بشكل أبطأ ، من فضلك.
إنه لا يلائمني .	مش مناسبني.	لا يناسبني.
هل من الممكن إجراء اتصال على أن يتم تحصيل أجرته من الطرف الآخر ؟	ممكن أعمل مكالمة وتوخذوا حقها من الطرف الثاني؟	هل يمكنني أن أقوم بعمل مكالمة وتؤخذها من الطرف الآخر ؟
عندك أية شيء يمكن أن أتعاطه للطفح الجلدي ؟	عندك أي اشي ممكن آخذه عشان هاذ الطفح الجلدي؟	هل لديك أي شيء يمكن أن آخذه لذلك الطفح الجلدي ؟
هل تفضلت و احتسيت القهوة معي ؟	تتفضل و تشرب قهوة معي؟	هل تفضل وتذاكر قهوة معي ؟
سأقوم بتسجيل الدخول في تمام الساعة الثامنة مساءاً تقريباً .	راح أنزل بالفندق حوالي الساعة ثمنية المسا .	سأنزل في الفندق حوالي الثامنة مساءاً.
إننا على ارتفاع اثني عشر ألف قدم .	احنا على ارتفاع اتناشر ألف قدم.	نحن على ارتفاع اتناشر ألف قدم.
لقد تمتعت بإقامتي . شكراً لك .	انبسطت بإقامتي . شكراً الك.	لقد أثرت في إقامة. شكراً لك.
أُفضلُ حجرة هادئة .	بفظل غرفة هادية.	أظل غرفة هادئة.
كان يجب تدبير وسيلة مواصلات . ذاهبة إلى بوسطن .	لازم ندبر طريقة أو سيارة رايحة على بوسطن.	يجب أن نبحث عن طريقة أو سيارة قادرة إلى بوسطن.
لقد سرق مسجل الفيديو من غرفتي .	سرقو مسجل الفيديو من غرفتي.	سرق مسجل الفيديو من غرفتي.
هذا هو طبقنا المميز , سمك موسى المشوي الخاص بدوفر .	هاذ طبقنا الخاص, سمك موسى المشوي الخاص بدوفر.	هذا طبقنا الخاص, سمك موسى المشوي الخاص بدوفر.
هل يمكن أن أختر جريدة يابانية , من فضلك ؟	ممكن اختار جريدة يابانية، لو سمحت؟	هل يمكن أن أختار جريدة يابانية ، من فضلك ؟
هل لي أن أقاطعكم ؟	ممكن أقاطعكم؟	هل يمكنني أن أقاطعكم ؟
هل يوجد بالقرب من هنا مطعم صيني ؟	في مطعم صيني قريب من هون؟	هل يوجد مطعم صيني بالقرب من هنا ؟
لا أريد أي شيء يكون كبير الحجم .	ما بدي أي اشي ظخم.	لا أريد أي شيء ضخم.
هل أنت الأخير في هذا الصف ؟	إنت الأخير بهاذ الصف؟	هل أنت الأخير في هذا الصف ؟
إن محفظتي نشلت في القطار .	وحدة سرق محفظتي في القطر.	واحدة سرق محفظتي في القطر.
