# Supplementary material for: Exploring prompting for dialectical machine translation: a focus on north Jordanian Arabic
Source: PeerJ journal article supplement (doi:10.7717/peerj-cs.3209), 2025-11-12
Supplement: Code.zip [file google_mT5_prediction.xlsx]

## Sheet: Sheet1
MSA	IrbidDial	T5
ما رأيك في مشاهدة فيلم آخر ؟	شو رأيك نشوف فيلم ثاني؟	شو رأيك بمشاهدة فلم ثاني؟
أريد كوبا من الماء لأتناول بعض الدواء , من فضلك .	بدي كاسة مي عشان اوخذ الدوا، لو سمحت.	بدي كاسة مي عشان أكل شوية دوا, لو سمحت.
أبغي كرة .	بدي طابة.	بدي كرة.
كيف تحب أن يصفف شعرك اليوم ؟	كيف بدك يسرحلك شعرك اليوم؟	شلون بتحب يصفف شعرك اليوم؟
أريد رداءا ذات أكمام طويلة .	بدي جاكيت كم طويل.	بدي جاكيت طويل.
ها-ها . صباح الخير حان دورك . إنه على ما يرام .	هههه. صباح الخير صار دورك. هو كويس.	ها-ها. الخير حان دورك. صح.
أين نتقابل ؟	وين بدنا نتلاقى؟	وين بنقابل؟
لقد أثلج صدري زيارة مقاركم الرئيسية وكذا ما جرى بيننا من مناقشات مهمة . شكراً جزيلاً على ما أبديتموه من تعاون .	فرحت كتير لما زرت مكاتبكم الرئيسية وكمان النقاشات الهمة اللي صارت بيناتنا. كتير شكراً على العون اللي قدمتوه.	انبسط صدري زيارة مقاركم الرئيسية وكذا ما جرى بيننا من مناقشات مهمة. شكرا كثير على ما قدمتموه من تعاون.
هل هذا قطار مباشر ؟	هاذ القطار مباشر؟	هاظ القطار مباشر؟
إبريق من القهوة ، لطفاً .	بكرج قهوة، لو سمحت.	إبريق قهوة ، لو سمحت.
كم تكلفة الإفطار ؟	بقديش الفطور ؟	قديش بتكلف الفطور؟
من فضلك اختر لي مائدة ذات منظر ليلي لطيف .	من فظلك إختارلي طاولة مع منظر حلو بالليل.	لو سمحت اخترلي طاولة مرتبة.
أين الحلاق ؟	وين الحلاق؟	وين الحلاق؟
الشاطئ أسفل يمينا . ياله من منظر رائع .	الشط تحت على اليمين. شو المنظر بجنن.	الشاطئ تحت يمين. حلو كثير.
كلاً ، إنهم متينين جداً .	لا، هظول كثير قويات.	لا، كثير متينين.
اتجه يسارا عند الناصية الثالثة .	روح يسار من عند الدخلة الثالثة .	طلع شمال عند الناصية الثالثة.
أين المحطة النهائية للحافلة ؟	وين اخر موقف للباص؟	وين المحطة النهائية للباص؟
كم يتقاضى المرشد في اليوم ؟	قديش بيوخذ الدليل باليوم؟	قديش بتوخذ المرشد اليوم؟
أريد كيساً من الفشار ، من فضلك .	بدي كيس بوشار، لو سمحت.	بدي كيس فشار، لو سمحت.
من فضلك غير خمسين آلاف ين إلى دولارات أمريكية .	لو سمحت اصرف الخمسين ألف ين لدولر أمريكي.	لو سمحت غير خمسين الاف ين لدولارات أمريكية.
أريد قاموس جيب ، من فضلك .	بدي قاموس بنحط بالجيبة ، لو سمحت.	بدي قاموس جيب، لو سمحت.
من فضلك ، أريد فنجاناً من القهوة البيضاء .	لو سمحت ، بدي فنجان قهوة بالحليب.	لو سمحت, بدي فنجانا قهوة بيضاء.
هل يمكن أن أحصل على قمصاني نظيفة غداً صباحاً ؟	ممكن ألاقي قمصاني نظيفات بكرا الصبح؟	بقدر اخد قمصاني نظيفة بكرة الصبح؟
حسنا , حجرتك يا آنسة هي رقم تسعة صفر ثمانية . هذا مفتاحك .	طيب، غرفتك يا آنسة هي تسعة صفر ثمنية. هاذ مفتاحك.	ماشي, حجرتك يا آنسة هي رقم تسعة صفر ثمانية. هاظ مفتاحك.
نعم ، بالطبع .	أيوا، أكيد.	اه ، بالطبع.
ما تكلفة المقاعد الخاصة بالشرفة ؟	قديش بتكلف الكراسي تبعت البرندة؟	قديش بتكلف المقاعد الخاصة بالشرفة؟
هل لي بدليل سياحي ؟	ممكن مرشد سياحي؟	ممكن بدليل سياحي؟
أجل ، وأودّ محاسبة المطلوب هاتفياً على قيمة المكالمة .	صح، وأنا بدي احاسب يلي رنيت عليه على حق المكالمة.	اه ، بدي أحاسب المطلوب تلفوني على قيمة المكالمة.
جلد التمساح الأمريكي .	جلد التمساح الأمريكي.	جلد التمساح الأمريكي.
سأكون هنا الساعة الثامنة إلى الربع .	رح أكون هون الساعة ثمانية إلا ربع.	رح أكون هون الساعة ثمنية للربع.
أظن أن الملابس المصنوعة في اليابان قد جرى تفصيلها على نحو أفضل بالتأكيد .	بتوقع انو الأواعي اللي صنعت في اليابان تفصلت بطريقة أحسن أكيد.	بتوقع انه الملابس المصنوعة باليابان جرى تفصيلها على شكل أحسن.
سأكون هناك حوالي السادسة مساءً .	راح أكون هناك حوالي الساعة ستة المسا.	رح أكون هناك تقريبا الساعة ستة المسا.
لا أجيد الإنجليزية . هل ثمة من يتحدث اليابانية هنا ؟	أنا مش بعرف أحكي إنجليزي. في حدا بحكي ياباني هون؟	ما بعرف إنجليزي. في حدا بحكي ياباني هون؟
إنني أتصل من كشك عمومي في ماسي .	أنا بحكي معك من كشك عام بماسي.	أنا بوصل من كشك عمومي بماسي.
كم الوقت ؟	قديش الساعة؟	قديش الوقت؟
إنني أبحث عن هذا .	أني بدور على هاظ.	بدور على هاظ.
لماذا لا تعطيها هدية ؟	ليش ما تعطيها هدية؟	ليش ما تعطيها هدية؟
استمتعنا بالعشاء .	كيفنا عالعشا.	انبسطنا بالعشا.
سأذهب بك على مقعدك . من هنا ، من فضلك .	راح اوديك على كرسيك. من هون، لو سمحت.	رح أروح بك على كرسيك. من هون، لو سمحت.
سأعود إليك عندما تكون أقل انشغالاً .	راح أرجعلك بس تكون مش مشغول كثير.	رح أرجع علىيك لما تكون أقل انشغال.
أنا السيد تكاهاشي بالغرفة رقم خمسة تسعة وأربعين . من فضلك أرسل أربع زجاجات من بيرة بودفايزر .	أنا الأستاذ تكاهاشي بالأوضة رقم ٥٩ . لو سمحت بدي أربع بطولين من البيرة بودفايزر.	أنا السيد تكاهاشي بالغرفة رقم خمسة تسعة وأربعين. لو سمحت ابعت أربع قنينة بودفايزر.
حسنا ، إنه وقت الغداء . هل تحب أن نناقشه على الغداء ؟	ماشي، وقت الاكل صار. بتحب نحكي عنها واحنا ناكل؟	ماشي، هو وقت الغداء. بتحب نأكله على الغداء؟
هناك الكثير من الينابيع الحارة .	في كثير ينابيع حارة.	في كثير من الينابيع الحارة.
سر مباشرة ، من فضلك .	روح ع طول، لو سمحت.	سر مباشرة ، لو سمحت.
هل تمانع إذا التقطت صورة لك ولسيارتك الأجرة ؟	بتمانع لو أخذت صورة إلك وللتكسي تبعتك؟	بتمنع إذا حطيت صورة لك وسيارتك الأجرة؟
كم من الوقت نحتاج للذهاب مشياً من هنا إلى مبنى البلدية ؟	قديش بدنا وقت عشان نمشي من هون لبناية البلدية؟	قديش بدنا وقت نروح من هون على مبنى البلدية؟
هل تستطيع أن تخفض سعرها لوجود بعض البقع بها ؟	بتقدر ترخصها لأنه في عليها شوية بقع؟	بتقدر تخفض سعرها لوجود شوية بقعد ؟
شكراً ، هذا يكفي .	شكراً ، هاظ بكفي.	شكراً ، هاظ بكفي.
أريد الشخص الذي يعد وثائق عادية في حجم ورقة الخطاب بدون الحاجة إلى طيهم .	بدي الشخص اللي بعمل الوثائق اللي بحجم الورق العادي بدون ما يظطر يثنيهم.	بدي الشخص اللي بصير وثائق عادية ب حجم ورقة الخطاب بدون الحاجة طيهم.
هل نحتاج إلى طرح هذا للتصويت ؟ إن لم نكن في حاجة إلى هذا ، فإمكاني أن أعتقد حينئذ أننا قد وصلنا إلى نتيجة , سأقوم بإرسالها إلى مجلس إدارتنا صباح غد .	هل احنا محتاجين نحط هاظ للتصويت؟ اذا لأ، بتوقع أنه وصلنا للنتيجة، بدي أبعثها لمجلس ادارتنا بكرا الصبح.	لازم ندور على هاظ للتصويت؟ إن ما كنت بحاجة ، رح أرسلها على مجلس إدارتنا بكرة بكرة.
أين مترو الأنفاق ؟	وين المترو؟	وين مترو الأنفاق؟
كنت أفكر في الحصول على هذه الدورة في فترة نصف العام المقبلة .	كنت بفكر أوخذ هالكورس بفترة نص السنة الجاية.	كنت بفكر أجيب هاي الدورة بسنة نص العام الجاي.
الخامس عشر من سبتمبر يوم احترام المسنين .	خمسطعش تسعة هو يوم احترام المسنين.	خمسطعش من شهر خمسطش يوم احترام المسنين.
ارفعوا أيديكم .	ارفعوا إيديكو	ارفعوا يديكم.
أين موقف الحافلات ل بي ؟	وين مجمع الباصات ل بي ؟	وين موقف الباصات ل بي؟
قم بدفعها من فضلك , إن كان ذلك ممكنا .	لو سمحت دزها , إذا بصير	دفعها لو سمحت, اذا كان ممكن.
لقد نسيت أن آخذ حقيبتي اليدوية .	نسيت آخذ شنتة الإيد.	نسيت أخذ شنتتي اليدوية.
فكرة صائبة . متى تخطط للمجيء ؟	فكرة صحيحة. متى بتنوي تيجي؟	فكرة كويسة. متى بتخطط للمجيء؟
اثنان ويسكي مع الماء , من فضلك .	تنين ويسكي مع مية, لو سمحت.	اثنين ويسكي مع مي, لو سمحت.
على فكرة , هل أنت غير مشغول السبت القادم ؟	بالمناسبة، راح تكون فاضي السبت الجاي؟	على فكرة, إنت مشغول السبت الجاي؟
هل لديك هذا باللون الأخضر الداكن ؟	عندك هاذ باللون الاخضر الغامق؟	عندك هاظ باللون الأخضر الداكن؟
هالو ، هل هذه تعود إلى روي ؟	مرحبا، هاي لروي؟	هالو، هاي بترجع روي؟
أريد حامل ثلاثي .	بدي حامل ثلاثي.	بدي حامل ثلاثي.
عظيم . كنت أبحث عن سيارة أجرة لكن هذا أفضل .	كتير حلو. كنت قاعد بدور على تاكسي بس هاي احسن.	ممتاز. كنت بدور على سيارة أجرة بس هاظ أحسن.
ثلاثة اثنان واحد اثنان . انتظر ثانية ، حسنا ؟ أريد أن أرسل لك شيئاً هنا . معذرة .	ثلاثه اثنين واحد اثنين. استناني شوي , طيب؟ بدي أبعثلك اشي هون. اعذرني.	ثلاث اثنين واحد اثنين. استنى مرة ثانية، طيب؟ بدي أرسللك اشي هون. لو سمحت.
حسنا ، إنه باهظ الثمن . إنه لم يصنع في اليابان ، أليس كذلك ؟	تمام ، هو غالي .اكيد مش صنع اليابان، مش؟	ماشي، هو غالي. ما صنع باليابان، صح؟
ويسكي اسكتلندي وماء من فضلك .	ويسكي اسكتلاندي ومية لو سمحت.	ويسكي اسكتلندي وماء لو سمحت.
هل توجد أية كازينوهات جيدة ؟	في أي كازينوهات حلوة؟	في كازينوهات كويسة؟
إنها عاملتني كما لو كنت متسولاُ .	عاملتني كإني شحاد.	هي عاملتني زي ما كنت متسولا.
شخص ما فتح الطرد الخاص بي .	في حد فتح الطرد تبعي.	حدا فتح الطرد الخاص بي.
هل تريد أن افحص موتور السيارة ؟	بدك ياني أفحص ماتور السيارة؟	بدك تفحص موتور السيارة؟
أنا في نزهة طويلة سيرا على الأقدام .	أني طالعة برحلة طويلة تمشاية عجري.	أنا بنزلة طويلة مشي على الأقدام.
هذه الأيام ، استخدم الكمبيوتر بشكل دائم في العمل .	هاي الأيام ، أنا بستخدم الكمبيوتر دايماً بالشغل.	هاي الأيام، بستخدم الكمبيوتر بشكل كامل بالعمل.
موظفو المبيعات في هذا المتجر لطفاء جداً .	موظفين المبيعات بهاذ المحل لطيفين كثير.	موظفو المبيعات بهاد المحل كثير حلو.
الثاني من على اليسار .	الثاني عالشمال .	الثاني من على اليسار.
هل أنزل هنا لمركز روكفيلر ؟	أنزل من هون عمركز روكفيلر؟	أنزل هون لمركز روكفيلر؟
هذه السيدة كاوازو في غرفة رقم ستة عشر أحدى عشر .	هاي الست كاوازو بالغرفة سطعش إحدعش.	هاي السيدة كاوازو بغرفة رقم ستطعش احدطعش.
هل تستطيع خفضها حتى عشرين دولار ، من فضلك ؟	بتقدر تنزلها لعشرين دولار، لو سمحت؟	بتقدر تخليها عشرين دولار، لو سمحت؟
أشعر بتحسن .	حاس بتحسن.	حاس بتحسن.
هل يمكنكم صرف الشيك ذو المائتي دولار الخاص بي ؟	بتقدروا تصرفولي الشيك أبو الميتين دولر تاعي؟	ممكن تصرف الشيك يلي فيه مائتي دولار ؟
ولكن لا ضرورة لدفع بقشيش .	بس ما في داعي للبخشيش.	بس ما ضرورة دفع بقشيش.
لقد جاء لتوه .	جا هسا.	طلعت على يه.
لنتصل به .	خلينا نرلنه.	رح نتصل به.
بالمناسبة ، اسمي هيروش إيجيما .	بالمناسبة، اسمي هيروشي ايجيما.	بالمناسبة ، اسمي هيروش إيجيما.
التاسع والعشرون من أغسطس .	تسعه وعشرين من آب.	بتسعة وعشرين من شهر تسعة.
هل لا زال لديكم مقاعد لعرض الليلة ؟	ظل في عندكم محلات لعرض الليلة؟	عندكم كراسي لعرض الليلة؟
أريد القيام بحجز للساعة الثالثة والنصف ظهراُ .	بدي أعمل حجز للساعة ثلاثة ونص الظهر.	بدي أحجز للساعة ثلاثة ونص الظهر.
سوف نحضرها الآن . ما هو رقم غرفتك ؟	رح نجيبها هلا . شو رقم غرفتك ؟	رح نجيبها هسا. شو رقم غرفتك؟
رقم غرفتي هو ثلاثة ستة وعشرين . هل يمكن أن تأخذ الغسيل ؟	رقم غرفتي هو ثلاثة ستة وعشرين. بصير توخذ الغسيل؟	رقم غرفتي ثلاث ستة وعشرين. ممكن توخذ الغسيل؟
أليس لديك دروس تجريبية ؟	ما عندك كورسات تجريبية؟	ما عندك دروس إجاتيبية؟
رحلة الطيران دلتا رقم ثمانية وعشرون والمتجهة إلي نيو أورلينز سوف تتأخر حوالي ساعة .	رحلة الطيارة دلتا رقم ثمانية وعشرين اللي رايحة على نيو أورلينز حتى تتأخر حوالي ساعة.	رحلة الطيران دلتا رقم ثمانية وعشرين والمروحة على نيو أورلينز رح تتأخر حوالي ساعة.
هل لديكم غرفة متاحة الليلة ؟	عندكم غرفة فاضية الليلة ؟	عندكم غرفة فاضية الليلة؟
بصراحة ، لا أتفق مع ذلك .	بصراحة، ما بتفق مع هاظ.	بصراحة، ما بتفق مع هيك.
هل لك أن تتفضل وتملأ هذه ؟	بتقدر تتكرم و تعبي هاي؟	بتقدر تفضل وتملأ هاي؟
يبدو أن النقود التي أعطيتني إياها ناقصة عشر دولارات .	شكله المصاري اللي إنطيتني اياها ناقصة عشر دولارات.	شكله النقود اللي عطيتني إياها ناقصة عشر دولارات.
بالخارج .	برا.	بالخارج.
أريد ما يخصني لكي أرحل .	بدي اللي بخصني مشان أروح.	بدي شو بخصني عشان ارحل.
هل يمكن أن ترسلها إلى عنواني في اليابان عن طريق بريد الطرود الدولي وتحصل الثمن من هناك ؟	ممكن توديها على عنواني باليابان عن طريق صفحة الطرود الدولي و توخذ حقه من هناك ؟	ممكن تبعثها على عنواني باليابان عن طريق بريد الطرود الدولي و تحصل الثمن من هناك؟
أين قسم السيدات ؟	وين قسم النسوان؟	وين قسم السيدات؟
إنه ألم حاد .	هو وجع قوي.	هو ألم حاد.
إنني في نفس السن .	أني بنفس العمر.	أنا نفس السن.
فكرة جميلة .	فكرة حلوة.	فكرة حلوة.
هل الأجانب يمكنهم الحصول على الكتب في المكتبة ؟	بقدروا الأجانب يستخدموا الكتب بالمكتبة؟	بقدروا يخذوا الكتب بالمكتبة؟
تحية . أنا جون .	مرحبا. أني جون.	تحية. أنا جون.
هل يمكن أن نبدأ اللعب عندما ينتهون ؟	بنقدر نبلش نلعب لما يخلصوا؟	ممكن نبدأ اللعب لما ينتهون؟
مائة وخمسة وثلاثون ين للدولار الواحد .	مية وخمسة وثلثين ين للدولار الواحد.	مية وخمسة وثلاثين ين للدولار الواحد.
نعم . انتظر , سوف احضر لك واحدة .	طيب. استنى، راح أجيبلك وحدة.	اه. استنى, رح اجيبلك وحدة.
هلا أنزلتني عند فندق هلتون من فضلك ؟	ممكن تنزلني عند فندق الهيلتون لو سمحت؟	ممكن تنزلني عند فندق هلتون لو سمحت؟
أين الاستعلامات الرياضية ؟	وين الاستعلامات الرياضة؟	وين الاستعلامات الرياضية؟
هذه هي فلوس أقلام الحبر . فاتورة بمائة دولار .	هايذ حق قلام الحبر. فاتورة بمية دولار.	هاي هي فلوس أقلام الحبر. فاتورة بمية دولار.
لا ، شكراً . من الأفضل أن لا أشرب المزيد .	لا، شكراً. احسنلي ما أشرب اكثر من هيك.	لا، شكراً. أحسن ما أشرب شوي.
بما في ذلك الإفطار ، والضريبة ، ورسم الخدمة ، سيكون الحساب خمسة أربعون دولارا للشخص الواحد في الليلة .	بتشمل الفطور، الضرايب، ورسم الخدمة، الحساب رح يكون خمسة وأربعين دولار للواحد في الليلة.	بما فيها الفطور، والضريبة، ورسم الخدمة، رح يكون الحساب خمسة أربعين دولار للشخص الواحد بالليلة.
ما عرض الأوبرا اليوم ؟	شو عرض الأوبيرا اليوم؟	شو عرض الأوبرا اليوم؟
أريد مقعداً يطل على الممر ، من فضلك .	بدي كرسي يطل عالممر، لو سمحت.	بدي كرسي طل على الممر، لو سمحت.
أجل أريد شيئاً أقرؤه .	أيوا بدي إشي أقراه.	تمام بدي إشي أقرأه.
غير محتمل بدرجة كبيرة .	بنطاقش بدرجة كبيرة.	مش محتمل كثير.
هل تعرف المطعم يا كيويا ؟	بتعرف المطعم يا كيويا؟	بتعرف المطعم يا كيويا؟
يستطيع الصرافون أن يغيروا دولاراتك من أجل بقشيش الكازينو . هل نذهب ؟	السمسارين بقدروا يصرفولك الدولرات عشان بخشيش الكازينو. بصير نروح؟	بتقدر الصرافين يغيروا دولاراتك عشان بقشيش الكازينو. بنروح؟
يسعدنا أن نقدم لك الشراب الذي تريده متبوعاً بالغداء . دليل كامل بالمشروبات التي نقدمها على رحلتنا موجودة في دليل المعلومات الخاص بمجلتنا .	بسعدنا إنه نقدملك العصير اللي بتختاره وبيلحقه الغدا . منوفر قائمة كاملة من الشراب في هاي الرحلة موجودة بقسم المعلومات تاع مجلتنا.	كثير نسعد نقدملك الشراب اللي بدك ياه متبوعا بالغداء. دليل كامل بالمشروبات اللي بدك اياها على رحلتنا موجود بمجلتنا.
هل أستطيع تأجير أداة للتنفس أثناء السباحة ؟	بقدر أستأجر شغلة للتنفس خلال السباحة؟	بقدر أجيب أداة للتنفس أثناء السباحة؟
آه . هل يمكنني الحصول على وجبتي فيما بعد ؟ أنا أشعر أنني لست على ما يرام الآن .	ممم. ممكن أخد وجبتي بعدين؟ حاسس حالي مش على بعضي هسا.	آه. بقدر اخد وجبتي بعدين؟ أنا مش كويسة هسا.
ما هو رقم الرحلة الجوية ؟	شو رقم رحلة الطيران؟	شو رقم الرحلة الجوية؟
أبغي تأجير سيارة من هذا الطراز لمدة يومين .	بدي استأجر سيارة من هاذ الموديل لمدة يومين.	بدي أأجر سيارة من هاد الطراز لمدة يومين.
أنا غير متأكد إذا كنت قد حزمت ملابس كافية لرحلة مدتها ثلاثة أيام .	أنا مش متأكد اذا جهزت وعية بتكفيني لرحلة مدتها ثلاث أيام.	أني مش متأكد اذا حزمت ملابس كافية لرحلة مدتها ثلاث أيام.
يوجد بجانب هذا المبني تحديداً .	هو جنب هاذ المبنى بالتحديد .	في جنب هاظ المبني كثير.
هه . هذه . يبدو اللون جميلاً عليك .	هه. هاي. شكل اللون حلو عليك كثير.	اه. هاي. شكلها حلو عليك.
هل أستطيع تناول غذائي الآن ؟	ممكن أوكل هسا؟	بقدر أكل اكلي هسا؟
هل يتوقف القطار في برايتون ؟	بوقف القطار عند برايتون؟	بوقف القطار ببرايتون؟
من المهم جدا أننا نستطيع الوصول إلى المواد الخام التي نحتاجها في المشروع .	اشي كثير مهم إنه قدرنا نوصل لمجموعة المواد الأساسية اللي راح نحتاجها للمشروع.	لازم نصل على المواد الخام اللي بدنا نطلبها بالمشروع.
أود أن أطلب بدلة داكنة من أجلي .	بدي أطلب بدلة لونها غامق عشاني.	بدي بدلة غامق لشخصي.
هذا جيد . متى هو ؟	هيك تمام. متى رح يكون؟	هاظ كويس. متى هو؟
أرغب في شراء شامبو .	أنا بدي أشتري شامبو.	بدي اشتري شامبو.
خمسون جنيهاً .	خمسين قنيه.	خمسين جنيه.
لا يوجد رسم ضروري .	مش موجود رسم ظروري.	ما في رسم ضروري.
هل كان لديك أية خدمات أخرى إلى جانب طعام الإفطار هذا الصباح ؟	في عندك أي خدمات ثانية غير فطور الصبح؟	عندك خدمات ثانية لجانب الفطور الصبح؟
متى يفتح المصرف ؟	أميت بفتح البنك؟	متى بفتح المصرف؟
إجمالي المبلغ المطلوب مائتان وثلاثة وأربعون جنيه ، يا سيدتي .	المبلغ الكلي بطلع ميتين وثلاثة وأربيعين جنيه، يا مدام.	إجمالي المبلغ المطلوب مائتين وثلاثة وأربعين جنيه ، يا سيدتي.
لماذا لم يأت إلى الحفلة أمس ؟	ليش ما اجى على الحفلة امبارح؟	ليش ما وصلوا على الحفلة أمس؟
أريد لفتان من ISO مائة ، فيلم ملون ، ستة وثلاثين لقطة ، من فضلك .	بدي لفتين أيزو مية، فلم ملون، ستة وثلاثين لقطة ، لو سمحت.	بدي لفتان من ISO مائة ، فلم ملون ، ستة وثلاثين لقطة ، لو سمحت.
هل لديك مرآة ؟	عندك مراية؟	عندك مرايا؟
هل من المقبول عدم اتباع أي شخص لتعليمات الأمن ؟	بصير حدا ما يتبع تعليمات الأمن؟	ممكن اتباع أي واحد لتعليمات الأمن؟
علىّ أن ألحق بطائرة العاشرة صباحاً .	لازم ألحق طيارة الساعة عشرة الصبح.	لازم ألحق بطيارة العشرة الصبح.
من اين يمكنني الحصول على مسكوكة لركوب المترو ؟	من وين ممكن أجيب تذكرة لأركب المترو؟	من وين بقدر اخد مسكوكة لركوب المترو؟
أين يمكنني تغير نقودي ؟	وين بقدر أصرف مصاريي؟	وين بقدر أغير نقودي؟
هل بها جهاز تدفئة ؟	بيها جهاز تدفئة؟	فيها جهاز تدفئة؟
أريد بعض الكريم الليلي .	بدي كريم ليلي.	بدي شوية كريم للي.
كم تتقاضى ثمنا لإرسالها لليابان ؟	قديش بدك توخذ عشان تبعثها على اليابان؟	قديش بدك ثمن عشان ترسلها لليابان؟
أكيدا التي تتحدث معك ، أنا عندي حجز مائدة في تمام الساعة السادسة والثلث هذا المساء . ولكني آسفة لأني سأصل متأخرة نصف ساعة .	أكيدا يلي بتحكي. عندي حجز طاولة عالساعة ستة و ثلث المسا. بس آسفة لإني رح أوصل متأخرة نص ساعة.	أكيد يلي بتحكي معك، انا عندي حجز طاولة الساعة ستة ولثلة الصبح. بس آسفة اني رح أوصل متأخر نص ساعة.
متي سنستقل القارب ؟	متى بدنا نركب القارب؟	متى رح نطلع القارب؟
أرغب في غرفة بحمام .	بدي غرفة بحمام.	بدي غرفة بحمام.
معذرة , متي ينتهي هذا الفيلم ؟	عفواً, متى بخلص هذ الفلم؟	معلش, متى بطلع هاظ الفلم؟
لقد تمكنت من تحقيق ذلك .	قدرت أوصل لهذا الشي.	بتقدر تحقق هيك.
هل هو طريق طويل ؟	هو الطريق طويل؟	هو طريق طويل؟
ما هي الأنواع التي لديكم ؟	شو الأنواع اللي عندكم؟	شو الأنواع اللي عندكم؟
سأرتبك . هل تمانع في رسم خريطة لي ؟	رح أرتبك. ما عندك مشكلة ترسملي خريطة؟	رح أرتبك. بتقدر رسملي خريطة؟
لدينا جمبري رائع جداً اليوم .	عنا جمبري مميز كثير اليوم.	عنا جمبري حلو اليوم.
هل لديك أيّ خرائط بسيطة للمدينة ؟	عندي أي خرايط بسيطة للمدينة؟	عندك خرائط بسيطة للمدينة؟
معذرة أريد الذهاب إلى فندقي في المدينة بالحافلة . أين يمكن أن أستقل حافلة ؟	عفواً، أنا بدي أروح على الفندق موجود بالمدينة بالباص. من وين بقدر آخذ باص؟	معلش بدي أروح على فندقي بالمدينة بالحافلة. وين بقدر أروح باص؟
شكراً . لكنني لا أعتقد أن عندي وقت للإقامة لمدة ليلتين . هل يمكنك حجز غرفة بسريرين لي في ذلك الفندق ليلة الثاني عشر من مارس فقط ؟	شكراً ، بس ما بتوقع أنه معي وقت عشان أظل ليلتين. ممكن تحجزلي غرفة مزدوجة في الفندق لليلة اثنعش ثلاث بس؟	شكراً. بس ما بظن انه عندي وقت للإقامة ليلتين. بتقدر تحجز غرفة بسريرين في هاظ الفندق ليلة ثمنطعش من شهر ثلاث ؟
بالتأكيد . كيف يمكننا خدمتك ؟	أكيد. كيف منقدر نخدمك؟	أكيد. كيف بقدر نعمل خدمتك؟
شيكات سياحية . شكراً . خذ تذكرتك وبطاقة المرور للصعود على متن الطائرة . كن هناك قبل وقت الرحلة بساعة من فضلك .	شيكات سياحية. شكراً. أخذ تذكرتك و الفيزا عشان تطلع على الطيارة. كون هناك قبل الرحلة بساعة لو سمحت.	شيكات سياحية. شكراً. خذ تذكرتك وبطاقة المرور للصعود على الطيارة قبل ما تطلع على الطيارة. كن هناك قبل ما تطلع على الطيارة بساعة لو سمحت.
أوافق . يجب أن تصبح طبيعية جداً .	أنا موافق. لازم تصير طبيعة كثير.	وافق. لازم تصبح طبيعية كثير.
أهذه عيادة إف ؟	هاي عيادة إف؟	هاي عيادة إف؟
هل لك أن تغيرهم إلى دولارات من فضلك ؟	ممكن تحولي اياهم لدولارات، لو سمحت؟	ممكن تبدلهم لدولارات لو سمحت؟
حسناً . أراك الساعة الثانية يوم الأحد .	تمام . بشوفك الساعة ثنتين يوم الأحد.	ماشي. بشوفك الساعة ثنتين يوم الأحد.
هل يمكنك أن تشذب شاربي ؟	ممكن لو سمحت ترتبلي شواربي؟	بتقدر تشذب شاربي؟
أود أن أصرف هذا الشيك بسبعين دولاراً .	بدي أصرف هاذ الشيك بقيمة سبعين دولر.	بدي أصرف هاظ الشيك بسبعين دولار.
الجزء المكتوب بالطريقة المائلة يشير إلى التغييرات التي حدثت في التسعينات .	الجزء اللي مكتوب بالطريقة المايلة بدل على التغييرات اللي صارت بالتسعينات.	جزء المكتوب بالطريقة المائلة يشير على التغييرات يلي وقعت في التسعينات.
هل تشمل هذه الرحلة زيارة لبرج سيرز ؟	بتشمل هاي الرحلة زيارة لبرج سيرز؟	هاي الرحلة بتضم الرحلة زيارة لبرج سيرز؟
أين ستنتهي الجولة ، ومتى ؟	وين راح تخلص الرحلة، و أميت؟	وين رح تطلع الجولة ، ومتى ؟
تفضل هذان دولاران . احتفظ بالباقي .	تفظل هي دولرين. خلي الباقي إلك.	تفضل هاذ دولار. خلي الباقي.
هل يوجد أي محل متعدد الأقسام قريب من هنا ؟	في أي مول قريب من هون؟	في محل متعدد الأقسام قريب من هون؟
هل ستزال تعمل جدول المواعيد ؟	هل رح تظل جدول المواعيد شغّالة؟	رح تظل تعمل جدول المواعيد؟
سوف آخذ هذه ، من فضلك .	راح آخذ هاظ ، لو سمحت.	رح آخذ هاي ، لو سمحت.
يقولون أن اليابان دولة غنية جداً .	بقولوا أنه اليابان بلد غني.	يقولوا انه اليابان دولة غنية كثير.
ملعقتين , من فضلك .	معلقتين , لو سمحت.	ملعقتين, لو سمحت.
أجل ، واحدة فقط . متى سأعرف ؟ وكيف سيتم تعويضي ؟	أها، بس وحدة؟ متى رح أعرف؟ وكيف رح يكون التعويض؟	اه ، وحدة بس. متى رح أعرف ؟ وكيف رح تعطيني ؟
هناك ، أمام بيانات السائح تماما .	هناك ، قدام بيانات السايح بالزبط .	هناك ، قدام بيانات السياح تمام.
أين أجد الاسطوانات المدمجة ؟	وين بلاقي السيديات؟	وين في الشناتي المدمجة؟
أنا متأثر للغاية , لا أستطيع البقاء ساكنا .	أنا متأثر كتير, ما قادر أضل ساكت.	أنا متأثر كثير, مش قادر أظل ساكنا.
هل هو قريب لنصل إليه سيراً .	هو قريب عشان نوصلو مشي؟	هو قريب لنصل لهيرا.
إني من إسبانيا .	أنا من إسبانيا.	أنا من إسبانيا.
ـ أين أقرب محل جزارة ؟	وين أقرب لحام؟	وين أقرب محل جزارة؟
أود تأجير هذا الطراز من السيارات لمدة أربعة وعشرين ساعة .	بدي أستأجر هاذ الموديل من السيارات لمدة أربع وعشرين ساعة.	بدي أأجر هاظ النوع من السيارات لمدة أربعة وعشرين ساعة.
لا يمكن أن أبيع هذه دون روشتة .	ما بقدر أبيع هاي بدون وصفة طبية.	ما بقدر أبيع هاي دون روشتة.
هل لديك صحف يابانية ؟	عندك جرايد يابانية؟	عندك صحف يابانية؟
هل هذا الحذاء متين ؟	هاذ البوط قوي؟	هاظ الحذاء متين؟
لكنّي لدى موعد لرؤيتها في السّاعة الثّانية .	بس أنا عندي موعد عشان أشوفها الساعة ثنتين.	أنا عندي موعد تشوفها بالساعة الثانية.
هل لديك غرف أكبر ؟	عندك غرف أكبر؟	عندك غرف أكبر؟
اعطني عامل التليفون من فضلك .	إعطيني عامل التلفون لو سمحت .	اعطيني عامل التلفون لو سمحت.
ظننت أنكم أيها الشباب تأكلون الكعك المخبوز فقط .	فكرت إنكو يا شباب بتوكلوا الكعك المخبوز بس.	ظننت إنكم الشباب بتاكلوا الكعك المخبوز بس.
أريد استئجار كرسي مركب .	بدي أستأجر كرسي اتمدد عليه.	بدي أستأجر كرسي مركب.
أنا أبحث عن شيء أنيق .	أني بدور على اشي لايق.	أنا بدور على اشي أنيق.
حسناً . هل يجب أن أقوم بتركيزها ؟	ماشي. لازم أساويها مركزة؟	ماشي. لازم أتركيها؟
قهوة مع القشدة والسكر ، من فضلك .	قهوة مع القشطة والسكر، لو سمحت.	قهوة مع القشدة والسكر، لو سمحت.
سوف ننتظر . من فضلك اتصل بنا عندما تكون مستعداً .	رح نستنى . لو سمحت, إتصل فينا لما تكون جاهز.	رح نستنى. لو سمحت رنلنا لما تكون مستعدا.
فقط سياحة .	بس للسياحة.	بس سياحة.
أحتاج إلى طيب .	بدي دكتور.	بدي طيب.
إن الجونلات القصيرة ومعها الأحذية الطويلة لن تنقضي موضتها .	مش ممكن تخلص موضة التنانير القصيرة مع الجزم الطويلة.	الجونلات الطويلة معها الأحذية الطويلة ما رح ترجعوا موضتها.
ألا ترغب في فنجان شاي ؟	ما بدك تشرب كاسة شاي؟	ما بدك فنجان شاي؟
ليس تماماً . فقط شيء ما غير غالي الثمن .	مش هيك. بس إشي مش غالي.	مش تمام. بس اشي مش غالي.
إذا كنت تودّ ، بإمكاننا الاستراحة هنا .	إذا إنت حاب، ممكن نستريح هون.	اذا بدك ، بقدر استراح هون.
هل هذه كلها هي حقائبك ؟	هاي كلها شناتيك؟	هاي كلها هي شناتيك؟
هل تريد بالحلويات ؟	بدك حلويات؟	بدك حلويات؟
نعم ، لكن ليس قويا جدا .	اه ، بس مش قوي كثير.	اه ، بس مش قوية كثير.
ويسكي وماء ، من فضلك . هل لديكم وجبة خفيفة معه ؟	ويسكي ومي، لو سمحت. عندكم سندويشة صغيرة او شيء خفيف معه؟	ويسكي و مي، لو سمحت.عندكم وجبة خفيفة معه؟
أتعرف كاثي ؟ إنه عيد ميلادها .	بتعرف كاثي؟ هاي حفلة عيد ميلادها.	بتعرف كاثي؟ هو عيد ميلادها.
أود تحميض هذا الفيلم . متي سيكون جاهزا ؟	بدي أحمض هالفلم. متى رح يكون جاهز؟	بدي تحميض هاظ الفلم. متى رح يكون جاهزا؟
تشغل أشخاصاً جدد في أبريل .	رح توظف ناس جداد في نيسان.	بتوخذ أشخاص جدد بشهر.
سأكون سعيدا بذلك . متى ترغب في ذلك ؟	رح اكون مبسوط لهالشي. متى بدك ياه؟	رح أكون سعيدة بهاد. متى بدك هاد؟
رائع .	بجنن.	حلو.
من فضلك اتجه يساراً عند التقاطع التالي .	لو سمحت روح عاليسار بالتقاطع الجاي.	لو سمحت روح على الشمال عند التقاطع الجاي.
هلا أريتني بعض الفساتين ؟	ممكن توريني شوي من الفساطين؟	ممكن تجيبلي شوية فساتين؟
أين المقهى ؟	وين الكوفي شوب ؟	وين المقهى؟
لا يمكنك جلب الألعاب النارية إلى كندا .	ما بتقدر تجيب ألعاب نارية على كندا.	ما بتقدر تجيب الألعاب النارية على كندا.
اعتقد أن هذا عالي قليلا بالنسبة لي .	بتوقع أنه شوي عالي بالنسبة الي.	شكله هاظ عالي شوي بالنسبة الي.
لم يعد بإمكانك حقيقةً أن تقوم بعمل تصميم دون كمبيوتر بعد الآن .	بطلت تقدر تعمل تصميم بدون كمبيوتر من هون و طالع.	ما بقدر تعمل تصميم دون كمبيوتر هسا.
أريد اسطوانة مدمجة .	بدي سي دي.	بدي اسطوانة مدمجة.
هل يمكنني حجز غرفة بسريرين تطل على المحيط ؟	بصير أحجز غرفة بتختين بطل على البحر؟	بقدر أحجز غرفة بسريرين طلة على المحيط؟
مايومي , هل تسمح أن تملأ هذه الورقة بتوقيعك ؟	مايومي، ممكن تعبيي هاي الورقة بتوقيعك؟	مايومي, بتقدر تسكر هاي الورقة بتوقيعك؟
هلا أرشدتني إلى مطعم مفضل بين الشبان ؟	ممكن ادلني على مطعم معروف بين الشباب؟	ممكن تساعدني على مطعم مفضل بين الشبان؟
حجزنا مقعداً ليوم الخامس والعشرين من أكتوبر في الساعة الحادية عشر صباحاً .	حجزنا مقعد لخمسة و عشرين من شهر عشرة الساعة احدعش الصبح.	حجزنا كرسي يوم خمسة وعشرين من شهر خمسة وعشرين الساعة عشرة الصبح.
إن الناس ودودون جداً .	الناس حابيين كثير.	الناس كثير كويسين.
متى يتعين علي أن أكون في المحطة ؟	أي وقت لازم أكون بالمحطة؟	متى لازم أكون بالمحطة؟
ليس هذا صحيحاً . أنت دائما تعاملني .	هاظ مش صحيح . إنت دايما بتعاملني.	مش صحيح. انت كثير بتعاملني.
ما نوع العصير الذي تفضله ؟	شو نوع العصير اللي بتحبه ؟	شو نوع العصير اللي بتحبه؟
هل لي في بعض الفلفل ؟	ممكن أخذ شوي فلفل؟	ممكن شوية فلفل؟
احتاج إلى بعض الهدايا التذكارية من نيويورك .	أنا بدي شوية هدايا تذكارية من نيويورك.	بدي شوية هدايا من نيويورك.
اسمي " تارو تاناكا " لدي حجز مسبق .	اسمي " تارو تاناكا " عندي حجز من قبل.	اسمي "تارو تاناكا" عندي حجز مسبق.
إنها الثالثة والربع .	الساعة ثلاثة وربع.	هي الثالثة والربع.
كم التكلفة كلها ؟	قديش الكلفة كلها؟	قديش بكلف كلها؟
لا أدري كم من النقود يجب علىّ تركه كبقشيش ؟	ما بعرف قديش لازم أترك بغشيش.	ما بعرف كم النقود لازم أتركه كبقشيش؟
سآخذ شيكولاتة ساخنة .	بدي آخذ هوت شوكليت.	بدي اخد شوكولاتة ساخنة.
ماذا تنوي أن تفعل عقب الانتهاء من المدرسة . ؟	شو بتخطط تعمل بعد ما تخلص مدرسة؟	شو بدك تفعل بعد ما تطلع من المدرسة.
أشعر بالغثيان .	بحس حالي بدي أتقيء.	حاس بالغثيان.
ماذا ؟ هل عليك دفع ضرائب عندما يكون لديك أكثر من ثلاثة زجاجات كحول ؟	شو؟ عليك ضرايب بس يكون عندك أكثر من ثلاث قناني كحول؟	شو؟ لازم تدفع ضرائب لما يكون عندك أكثر من ثلاث زجاجات كحول؟
لقد حصلت على بطارية فارغة .	بطاريتي صارت فاضية.	خذت بطارية فاضي.
معذرة . أنا طالب جامعي من اليابان . هل أنتم طلاب في جامعة نيويورك ؟	معلش، أنا طالب جامعي من اليابان. إنتوا طلاب بجامعة نيو يورك؟	معلش. انا طالب جامعي من اليابان. بتتدرس بجامعة نيويورك ؟
من الذي يعزف ؟	مين اللي عم يعزف؟	من وين بلعب؟
معطف رائع . هل هو صناعة بريطانية ؟	جاكيت حلو. هاد صنع بريطاني؟	معطف حلو. صناعة بريطانية؟
هل لديكم فيلم شفاف ملون ؟	عندك فلم شفاف ملون؟	عندكم فلم شفاف ملون؟
أين قسم السيدات ؟	وين قسم النسوان؟	وين قسم السيدات؟
جميل الفستان التي ترتدينه .	حلو الفسطان اللي لابسيته.	حلو الفستان اللي ترتدينه.
تموج شعر دائم مشدود من فضلك .	كيرلي عطول مشدود، لو سمحت.	صار شعر كثير مشدود لو سمحت.
هل لدينا وقت كاف لإنهاء إجراءات المغادرة ؟	معنا وقت كافي لنخلص إجراءات المغادرة؟	عندنا وقت كافي لوقف إجراءات المغادرة؟
هل هناك جولة بالحافلة تجوب المدينة ؟	في دورة بالباص نلف بالبلد؟	في جولة باص بتروح المدينة؟
هل أستطيع الحصول على تذكرة متعددة الاستخدام ؟	ممكن أوخذ بطاقة ذكية؟	بقدر اخد تذكرة متعددة الاستخدام؟
كان فيلم " حرب الكواكب " أكثر الأعمال شعبية عام ألف وتسعمائة وأربعة وثمانون .	كان فيلم "حرب الكواكب" من أشهر الأفلام سنة ألف وتسعمائة وأربعة وثمانون.	كان فلم "حرب الكواكب" أكثر الأعمال شعبية عام ألف وتسعمية و اربعة وثمانين.
أوه ، يجب أن تخطر القنصلية على الفور .	أوه، لازم تبلغ القنصلية هسا.	اوه ، لازم تخطر القنصلية على الفور.
هل يوجد ملهى ليلي جيد به عرض رقصة الفلامنكو ؟	في نايت كلوب رايق عنده رقصة الفلامنكو؟	في ملهى ليلي كويس به عرض رقصة الفلامنكو؟
لماذا لم تقلع الرحلة ؟ أخبرني عما يجري .	ليش ما طلعت الرحلة؟ قلي شو بصير.	ليش ما طلعت الرحلة؟ احكيلي شو بجري.
سأصبح بديناً في حال ما ظللت جالساً هنا آكل باستمرار .	رح أصير ناصح لو استمريت قاعد هون آكل دايما.	رح أصبح بدينا اذا ظلت هون اكل كثير.
هل على السيدات ارتداء فستان سهرة ؟	لازم الستات يلبسن فسطان سهرة؟	لازم السيدات لبس فستان سهرة؟
حسنا إذاً ، أريد عصا مضرب أصغر كتلك التي مع جوليا روبرتس .	ماشي يعني، بدي عصاة مضرب اصغر مثل اللي مع جوليا روبرتس.	تمام ، بدي عصا مضرب أصغر من جوليا روبرتس.
أريد أن اتصل هاتفياً بالسفارة اليابانية .	بدي أحكي بالتلفون مع السفارة اليابانية.	بدي اتصل تلفوني بالسفارة اليابانية.
هل هذه السجائر معتدلة ؟	هاي السقاير معتدلة؟	هاي السجاير معتدل؟
هل هذا طلب شخص آخر .	هاظا طلب واحد ثاني؟	هاظ طلب حدا ثاني.
في حالة إمكان ذلك , احجز منضدة بالقرب من النافذة من فضلك .	لو في امكانية, احجزلي طاولة عند الشباك لو سمحت.	اذا صار هاد, احجز طاولة قريبة من الشباك لو سمحت.
هل يمكن أن نحجز طاولة لخمسة أشخاص ؟	ممكن نحجز طاولة لخمس أشخاص؟	ممكن نحجز طاولة لخمس أشخاص؟
شركة الخطوط الجوية اليابانية ، طائرة رقم واحد اثنان ثلاثة .	شركة الخطوط الجوية اليابانية، رحلة الطيران رقم واحد اثنين ثلاثة.	شركة الخطوط الجوية اليابانية، طيارة رقم واحد اثنين ثلاث.
من فضلك اتصل بي في الفندق عندما تجد حقائبي .	من فضلك، كلمني بالفندق لما تلاقي شنطي.	لو سمحت رنلي بالفندق لما تجد شناتيي.
ذلك الحد الأدنى للسعر .	هيك أقل سعر.	هاظا الحد الأدنى للسعر.
أنت محظوظ .	إنت محظوظ.	إنت محظوظ.
هل سيكون هذا المتجر مفتوحاً غداً ؟	راح يكون هاظ المحل فاتح بكرا؟	راح يكون هاظ المحل مفتوح بكرة؟
وصلت الفاتورة لمائة دولار .	وصلت الفاتورة لمية دولار.	وصلت الفاتورة لمائة دولار.
هل هذا مكتب الاستقبال ؟ هل يوجد عيادة قريبة ؟	هاظ مكتب الاستقبال؟ في عيادة قريبة من هون؟	هاظ مكتب الاستقبال؟ في عيادة قريبة؟
كم عمر ابنتك ؟	قديش عمر بنتك؟	قديش عمر ابنتك؟
لن ينضم للجولة الاختيارية إلا القليل من الناس .	ما رح ينضم للجولة الاختيارية غير شوي من الناس.	ما رح يشارك بالجولة الاختيارية بس شوي من الناس.
إنها مجرد هدية تعبيرا عن تقديري .	هاي مجرد هدية تعبير عن تقديري.	هي هدية تعبيرا عن تقديري.
تحتاج لرؤية أخصائي .	بتحتاج تشوف دكتور متخصص.	بدك تشوف أخصائي.
كم تكلّف هي لكل جالون ؟	كم سعر الغلون الواحد؟	قديش بتكلف كل جالون؟
أيمكنني الحصول على جدول زمني ، من فضلك ؟	ممكن أحصل على جدول الوقت، لو سمحت؟	ممكن أخذ جدول زمني، لو سمحت؟
لقد سُرقت حقيبتي .	انسرقت شنتتي.	ضيعت شنتتي.
نستخدم الأعواد عندما نأكل .	بنستعمل العيدان لما بنوكل.	نستخدم الأعواد لما نأكل.
حسناً ، في حالة إصرار كليكما , سأذهب معكما .	طيب، اذا انتو الاثنين مصرين، أني راح اروح معكو.	ماشي، اذا صار كليكما, رح أروح معك.
في أي محطة سأنزل للذهاب إلى مبنى إمباير ستيت ؟	بأي موقف لازم انزل عشان أروح على عمارة امباير ستيت؟	في أي محطة رح أنزل عشان أروح على مبنى إمباير ستيت؟
لابد أن تأخذها تسعة وتسعون مرة في اليوم ، قبل الوجبات .	لازم تاخذها تسعة وتسعين مرة باليوم، قبل الأكل.	لازم توخذها تسعة وتسعين مرة باليوم، قبل ما توكل.
لا يا سيدي . هذه الظهيرة محجوزة بالكامل . ومع ذلك يمكن أن تحجز غدا .	لا، يا أستاذ، اليوم بعد الظهر كله محجوز. لكن بتقدر تحجز بكرا .	لا يا سيدي. هاي الظهيرة محجوزة كامل. بس بصير تحجز بكرة.
هل هناك طبيب للفندق أو واحد على صلة بالفندق .	في دكتور للفندق أو واحد ع علاقة بالفندق؟	في دكتور للفندق أو واحد على صلة بالفندق.
المياه الساخنة ليست ساخنة بالقدر الكافي .	المية الحامية مش حامية بشكل كافي.	المياه الساخنة مش ساخنة بالقدر الكافي.
هل استرحت في نومك ؟	ارتحت بالنومة؟	استرحت بنومك؟
أريد إعادة المال . هل يمكن أن أحصل على مالي ؟	بدي أرجع المصاري. بقدر أوخذ مصرياتي؟	بدي أرجع المال. بقدر أجيب مالي؟
انها باتجاه الجنوب .	هي باتجاه الجنوب.	هي جاهزة الجنوب.
ما سعر تذكرة درجة أولى إلى إدنبره , من فضلك ؟	كم سعر تذكرة درجة أولى لإدنبره , إذا تكرمت.	قديش سعر تذكرة درجة أولى لـ إدنبره, لو سمحت ؟
عندي قشعريرة .	عندي قشعيرية.	عندي قشعريرة.
لماذا , شكرا جزيلا . هل أستطيع الارتقاء للقمة ؟	ليش، شكراً كثير الك. بقدر اطلع للقمة؟	ليش, شكرا كثير. بقدر أرجع للقمة ؟
لا . هل تحب الإبلاغ عنه ؟	لا . بدك تبلغ عنو ؟	لا. بتحب تبعثلي عنه ؟
من فضلك غير هذه الينات إلى جنيهات .	لو سمحت اصرفلي هظول من ين لقنيه.	لو سمحت غير هاي الينات لجنيهات.
سآخذ مقاعد درجة رجال أعمال ، أليس كذلك ؟	راح آخد مقاعد درجة رجال الأعمال، صح؟	رح آخذ مقاعد درجة رجال أعمال، صح؟
لا أستطيع أن أفعل ذلك , لكني سوف أضعها في الحقيبة لك .	ما بقدر اعمل هيك , بس رح احطها بالشنتة الك .	مش قادر أعمل هيك, بس رح أعطيها بالشنتة الك.
إنه غالي الثمن إلى حد ما . ألا يمكنك منحي خصماً ؟	هاد كثير غالي. ما فيك تعطيني شوية خصم؟	غالي كثير. ما بتقدر تخصم خصم؟
إن " السنة " متقلقلة .	ال"سنة" عم تتقلب.	السنة "متقلقلة".
سيكون جاهزا بعد غد في المساء .	راح يكون جاهز بعد بكرا المسا.	رح يكون جاهزا بكرة الصبح.
هل ليدكم صناديق لإرسال الطرود ؟	عندكم علب لارسال الطرود ؟	عندكم صناديق لإرسال الطرود؟
إن عثرت على شيء ، اتصل بي من فضلك .	لو لقيت إشي، رنلي إذا تكرمت.	اذا عثرت على اشي، رنلي لو سمحت.
أود تقصيره ببوصة واحدة من هذه المنطقة .	بدي اقصّره بوسطة وحدة من هادي المنطقة.	بدي أقصيره ببوصة وحدة من هاي المنطقة.
هل لديكم أي خبز ؟	عندكم خبز؟	عندكم خبز؟
أود بعض البيجامات .	بدي بيجامات.	بدي شوية بيجامات.
أين يمكنني طباعة الفيلم ؟	وين بقدر أطبع الفلم؟	وين بقدر أكتب الفيلم؟
أيمكنك الحضور إلى هنا لإصلاحه ؟	ممكن تيجي هون عشان اتصلحه؟	بتقدر تروح هون عشان تصلحه؟
أين يمكنني أن أستقل حافلة لمشاهدة المعالم ؟	من وين ممكن اركب باص لحتى اتفرج ع المعالم؟	وين بقدر أروح باص عشان أشوف المعالم؟
مرحبا يا سيدة ياماجوتشي ؟ فريقك على الخط . قبلت دعوتك . استمر من فضلك .	أهلا وسهلا يا سيدة ياماجوتشي، فريقك عم يكلمك. رديت على دعوتك. استمري، من فضلك.	مرحبا يا سيدة ياماجوتشي؟ فريقك على الخط. قبلت دعوتك. استمر لو سمحت.
هل لك أن تساعدني في الوصول إلى حقيبتي ؟	ممكن تساعدني ألاقي شنتيتي؟	ممكن تساعدني أصل على شنتتي؟
آسف لقد نفذ هذا الصنف لدينا .	معذرة، هاد النوع خلص عنا.	آسف انه نفذ هاظ الصنف عنا.
ما اسم الشخص الذي تود التحدث إليه ؟	شو اسم الشخص اللي بدك تحكي معه؟	شو اسم الشخص اللي بدك تحكيه؟
لقد اجتزت هذا الاختبار بنجاح كبير .	عديت الامتحان بنجاح كبير .	إجيت هاذ الاختبار بجنن كبير.
طبقاً لتقرير الطقس ، فإن غداً سيشهد سقوط جليد .	بناءً على النشرة الجوية، راح تثلج بكرا.	طبقا لتقرير الطقس، بكرة رح يطلع جليد.
لا أستطيع ضبط اللوحة .	مش قادر أزبط الصورة.	مش قادر أبط اللوحة.
لا زالت غالية جدا . هل من الممكن أن آخذها بثلاثة دولارات ؟	بعدها غالية كثير. ممكن أشتريها بـثلث دولارات؟	ظلت غالية كثير. ممكن أخذها بثلاث دولارات؟
نريد اثنين هامبورجر واثنين قهوة ، من فضلك ، نريد تناولها خارج المحل .	بدنا زوج همبرجر وزوج قهوة، لو سمحت، بدنا ناكلها برة المحل.	بدنا اثنين هامبورجر واثنين قهوة، لو سمحت، بدنا نستناكها خارج المحل.
زدني قليلاً .	زيدني شوي.	شوي شوي.
هل لي بشوكة أخرى ؟	بدي شوكة ثانية؟	ممكن بشوكة ثانية؟
أنا هنا في مهمة إعلامية .	أنا هون بشغل إعلامي.	أنا هون بشغل إعلامي.
إنها ليست أحدث طراز ، أليس كذلك ؟	هاي مش أحدث موديل ، صح؟	مش أحدث طراز، صح؟
أبغي بعض الأقراص المنومة .	بدي حبوب منوم.	بدي شوية قرص منومة.
أي حافلة تذهب إلى وسط المدينة ؟	أي باص رايح عالدوار الرئيسي؟	أي باص بروح على وسط البلد؟
أريد الذهاب إلى مركز هارفارد . هل يمكن أن تخبرني عندما نصل إلى هناك ؟	بدي اروح على مركز هارفارد. ممكن تقلي لما نوصل هناك؟	بدي أروح على مركز هارفارد. بتقدر تحكيلي لما نوصل لهناك؟
أريد أن أحجز على شركة نورث وست إيرلينز على الرحلة رقم صفر ثمانية ستة في الخامس .	بدي احجز على شركة نورث وست إيرلينز على الرحلة رقم صفر ثمانية ستة بخمسة الشهر.	بدي أحجز على شركة نورث وست إيرلينز على الرحلة رقم صفر ثمنية ستة بخمسة.
لقد استمتعت بالوجبة كثيراً جداً .	كثير استمتعت بالوجبة.	انبسطت بالوجبة كثير.
سيكون هناك تأخير بسيط .	راح يكون في تأخير بسيط.	رح يكون في تأخير بسيط.
فقط إذا كانت ملكك ، سيدي . هاها ، مزحة صغيرة .	بس اذا كانت ملكك ، يا سيدي . ههههههه، هاي مزحة صغيرة.	بس اذا كانت ملكك ، سيدي. هاي ، مزحة صغيرة.
نستطيع أن نرتب لتنظيف غرفاتكم .	ممكن نرتب معك عشان تنظيف غرفكم.	بقدر نرتب لتنظيف غرفاتكم.
وما هي المثانة ؟	وشو هي المثانة ؟	شو المثانة؟
لا أستطيع النوم جيداً أثناء الليل .	ما قدرت أنام مليح بالليل.	مش قادر أنام كويس بالليل.
ما هو مستوى مهارتك في عزف الكمان ؟	شو مستواك بعزف الكمان؟	شو مستوى مهارتك ب عزف الكمان؟
ما هي أكثر الأشياء التي تثير اهتمامك الآن ؟	شو أكثر الأشياء اللي بتلفت انتباهك هسا ؟	شو أكثر أشياء اللي بتثير اهتمامك هسا؟
اجعل قصة الشعر تتدلى لأسفل , من فضلك .	خلي قصة الشعر تنزل لتحت، لو سمحت.	خلي قصة الشعر تطلع لتحت, لو سمحت.
هل لك أن تستدعي لي سيارة أجرة الساعة الثامنة صباح غد ؟	ممكن تجيبلي تكسي بكرا الساعة ثمنية الصبح؟	بتقدر تطلبلي سيارة أجرة الساعة ثمنية الصبح بكرا؟
هلا ملأت هذا النموذج ؟	ممكن تعبي هاذ النموذج؟	ممكن مليت هاظا النموذج؟
أيمكنك الانتهاء من ذلك بعد عشر دقائق ؟	بتقدر تخلص هاي بعد عشر دقايق؟	ممكن تطلع من هيك بعد عشر دقايق؟
الملح من فضلك .	الملح لو سمحت.	الملح لو سمحت.
لقد نمت و لم أتيقظ حين رن منبه السادسة و النصف .	نمت و ما صحيت ع منبه الساعة ستة ونص.	نمت و ما اتوقعت لما رن منبه السادسة و نص.
نحن من أكبر موردي أجهزة الميكروكومبيوتر .	إحنا من أكبر موردين لأجهزة الميكرو كمبيوتر .	احنا من أكبر موردي أجهزة الميكروكوبيوتر.
من فضلك أخبرني كيف أملأ بطاقة النزول إلى البر ؟	لو سمحت قلي كيف أعبي بطاقة النزول للبر؟	لو سمحت احكيلي كيف أجيب بطاقة النزول على البر؟
دجاج محمر ، من فضلك .	دجاج مشوي، لو سمحت.	دجاج محمر ، لو سمحت.
أجل ، ولكن هذا كثير جدا ، ولقد شبعت بالفعل .	أيوة، بس هاي كتير كثير ، وأنا صرت أكلت كفاية.	اه ، بس هاظ كثير كثير ، و شبعت فعلا.
لقد أُغلق علي الباب . هل يمكن أن تفتح بابي , من فضلك ؟	ييي تسكر علي الباب . بتقدر تفتحلي الباب، لو سمحت؟	ضيعت عالباب. بتقدر تفتح بابي, لو سمحت؟
بكل تأكيد . سنكون سعداء لفعل هذا .	أكيد. راح نكون مبسوطين نعمل هيك.	أكيد. رح نكون سعداء لتعمل هاظ.
يقولون إن الأنفلونزا منتشرة هناك .	بيقولوا انو الإنفلونزا معمية هنيك.	يقولوا إن الأنفلونزا منتشرة هناك.
هل ستدفع شركة الطيران رسوم الفندق والوجبات ؟	رح تدفع شركة الطيران رسوم الفندق والوجبات؟	رح تدفع شركة الطيران رسوم الفندق والوجبات؟
نسيت تذكرة الطيران الخاصة بي في الفندق .	نسيت تذكرة الطيارة قيتي بالفندق.	نسيت تذكرة الطيران الخاصة بي بالفندق.
هل يمكن أن احصل على احدى المجلات أو شيئ من هذا القبيل ؟	ممكن أوخذ وحدة من المجلات أو شي زي هيك؟	ممكن أخذ حدا من المجلات او اشي من هاد النوع؟
تناسبني تماما .	مناسبيتني كثير.	ناسبني تمام.
خذني إلى المستشفى .	خذني على المستشفى.	خذني على المستشفى.
ربما كان يعاني سّدَّة تنفسية .	ممكن عنده صعوبة بالتنفس.	شكله كان فيه مشكلة تنفسية.
كم تكلفة الذهاب إلى فندق سي ؟	قديش بتكلف الروحة لفندق سي؟	قديش بتكلف الروح على فندق سي؟
هل هناك أي غرف خالية في عربة النوم ؟	ظل في أي غرف فاظية بعرباية النوم؟	في غرف خالية بالحمام؟
هل يوجد بوتيك قريب من هنا ؟	في بوتيك قريب من هون؟	في بوتيك قريب من هون؟
عندما أرى الأسعار بهذا الرخص ، يبدو الأمر سخيفاً أن أشتري أي شيء في اليابان .	لما أشوف الأسعار بهالرخص ، بحس أنه مسخرة الواحد يشتري أي شي باليابان.	لما اشوف الأسعار بهاد الرخص، شكله كثير سخيف أشتري أي اشي باليابان.
لم يخرج من الماكينة شيء .	ما طلع من الماكينة إشي.	ما طلع من الماكينة اشي.
كم كان ثمنها ؟	قديش كان حقها ؟	قديش كان سعرها؟
أريد هدية بمناسبة الذكرى السنوية .	بدي هدية لمناسبة الذكرى السنوية.	بدي هدية بمناسبة الذكرى السنوية.
علي أن ألحق طائرة متجهة للوس أنجليس باكر صباح غد .	لازم ألحق طيارة لوس أنجلوس بكرا الصبح بكير.	لازم ألحق الطيارة اللي رايح للوس أنجليس باكر بكرة.
يا صاح , أتعرف أي مكان يستحق الرؤية قريبا من هنا ؟	أخوي، بتعرف أي مكان محرز الشوفة قريب من هون؟	يا صاح, بتعرف أي مكان لازم أشوف قريب من هون ؟
عندي الكثير من الوقت .	عندي وايد وقت.	عندي كثير وقت.
من أين يمكنني شراء بعض الهدايا التذكارية ؟	منين بقدر أشتري شوية هدايا تذكارية ؟	من وين بقدر اشتري شوية هدايا تذكارية؟
أنظر إلى هذا . انظر إلى هذا . سوف تخبرني أن الاختلاف بين هذا الشاب وذلك الشاب هو الحظ ؟ محمد ، يقف بالسيارة في جانب الطريق ، وأنت ؟ لن تمانع في أن أنام معك هنا . أنا متأخر . كان لقاء جميل معك ؟	شوف هاظ. شوف هاظ. راح تحكيلي انو الفرق بين هالشب وهذاك الشب هو الحظ؟ محمد، واقف بالسيارة على زقاق الشارع، وإنت؟ ما راح تعترض اذا قعدت معك هون. انا تأخرت. كان لقاء حلو معك؟	شوف هاذ. شوف هاذ. رح تحكيلي انو الاختلاف بين هاذ الشاب و هاذ الشاب هو الحظ؟
أعمل في شركة تجارية .	أني بشتغل بشركة تجارية.	بعمل بشركة تجارية.
أفهم ، لكن لا أستطيع أن أقولها .	فاهم، بس بقدر أقولها.	بفهم، بس مش قادر أقولها.
نصف زجاجة , من فضلك .	نص قنينة ، لو سمحت.	نص قنينة, لو سمحت.
متى تقام مباراة كرة القدم ؟	متى بتبلش مباراة كرة القدم؟	متى بيجي مباراة كرة القدم؟
ما هو متوسط أسعاركم للفاكس الدولي كل شهر ؟	كم معدل تكلفة الفاكس الدولي كل شهر؟	شو سعركم للفاكس الدولي كل شهر؟
انتظر دقيقة من فضلك .	استنى دقيقة لو سمحت.	انتظار دقيقة لو سمحت.
هل هو محجوز بالكامل ؟	هو محجوز كله؟	هو محجوز بالكامل؟
شيء خطأ مع حقيبتك .	اشي غلط بشنتك .	شي غلط مع شنتتك.
كلا منا يريد أن يحاسب على وجبته .	إحنا كل واحد بدو يدفع عن أكلته.	لا واحد بدي يحاسب على وجبته.
ألم تتلق الاستمارة بالطائرة ؟	ما أخذت الاستمارة بالطيارة؟	ممكن تجيب الاستمارة بالطيارة؟
هل لديك أي شيء لفترة أطول قليلاً ؟	عندك أي اشي لوقت أطول شوي؟	عندك إشي لفترة أطول شوي؟
أجل ، من فضلك أرسله إلى الغرفة اثنا عشر أربعة وثلاثون .	أيوه، لو سمحت وديه على الغرفة اثنعش أربعة وثلاثين.	اه ، لو سمحت ارسله على الغرفة اثنعش أربعة وثلاثين.
أين البحيرة ؟	وين البحيرة؟	وين البحيرة؟
هل هناك حافلة تذهب مباشرة إلى هناك ؟	في أي باص بروح هناك مباشرة؟	في باص بروح مباشرة لهناك؟
أريد هذا الطراز لخمسة أماكن مرصعة .	بدي هاي النوعية لخمس أماكن مرصعة.	بدي هاظ الطراز لخمس أماكن مرصعة.
هل لك أن تغلف هذه كالهدية ؟	ممكن تلفلي هاي كهدية؟	بتقدر تغلف هاي كالهدية؟
نعم لدينا هذا ، سوف نجهزها لك .	اه موجود عنا. رح نجهزلك اياه.	اه عنا هاظ ، رح نجهزلك.
هل يمكنك تبديل هذه بواحدة جديدة ؟	ممكن تبدلي هاي بوحدة جديدة؟	بتقدر تبديل هاي بواحدة جديدة؟
عفواً . ستكون جاهزة في غضون خمس دقائق .	عفوا. رح تكون جاهزة خلال خمس دقايق.	عفواً. رح تكون جاهزة بعد خمس دقايق.
أين يمكنني أن أشتري إبريقاً ؟	من وين بقدر اشتري بريق؟	وين بقدر اشتري بريق؟
أعتقد أن عمره أكثر من خمسين سنة .	بتوقع عمره اكثر من خمسين سنة.	بتوقع عمره أكثر من خمسين سنين.
أود أن أطلب , من فضلك .	بدي أطلب , بعد إذنك.	بدي اطلب, لو سمحت.
معذرة . كيف يمكنني الوصول إلى المصرف ؟	معلش، كيف بقدر أوصل للبنك؟	معلش، كيف بقدر أوصل للمصرف؟
لدي بعض الملابس للمغسلة .	عندي شوية وعية للغسيل.	عندي شوية ملابس للمغسلة.
كريمة وسكر ؟	كريمة وسكر؟	كريمة وسكر؟
هل يوجد أي قطار سريع إلى بوسطن ؟	في أي قطار سريع لبوسطن؟	في قطار سريع ل بوسطن؟
الحجوزات في السابعة ، تحت اسم مانو .	حجوزات الساعة سبعة، بإسم مانو.	الحجوزات الساعة سبعة ، تحت اسم مانو.
أين أفضل مكان لمشاهدة المعالم ؟	وين أحسن مكان لشوفة المناظر؟	وين أحسن مكان لمشاهدة المعالم؟
هل يمكنك أن تريني كيف أضع الغاز ؟	ممكن توريني كيف أحط الغاز؟	بتقدر تفرجيني كيف أحط الغاز؟
علىّ أن أذهب ، سأتصل بك لاحقاً .	أني لازم أروح. رح أحكي معك بعدين.	لازم أروح، رح أتصل بك بعدين.
لا كهرباء .	ما في كهربا.	لا كهرباء.
ثلاثون دولاراً وثمانون سنتا .	ثلاثين دولار وثمانين سنت.	ثلاثين دولار وثمانين سنت.
هل تعرف طبيب أسنان جيد ؟	بتعرف دكتور اسنان كويس؟	بتعرف دكتور أسنان كويس؟
هل من الممكن أن أمكث في غرفتي حتى الثانية مساءً ؟	ممكن أظل بغرفتي للساعة ثنتين المسا؟	ممكن أظل بغرفتي للساعة ثنتين المسا؟
إن حول غرفتي ضجيجا بالغا .	في ضجة كبيرة حوال غرفتي	حول غرفتي ضجيجا بالغا.
كم ستستغرق لكي تطلب ؟	قديش بدك يعني عشان تطلب؟	قديش بدك وقت عشان تطلب؟
معدتي تؤلمني بعد الوجبات .	معدتي بتالمني بعد الوجبات.	معدتي بتؤلمني بعد الاكل.
نفضل مائدة بجوار النافذة .	بنحب طاولة جنب الشباك.	بدي طاولة جنب الشباك.
كنت على رحلة يونيتد إيرلاينز رقم ثمانية اثنان ثمانية .	كنت برحلة يونايتد إيرلاينز الرقم ثمانية اثنين ثمانية.	كنت على رحلة يونيتد إيرلاينز رقم ثمانية اثنين ثمانية.
هل لك أن ترسم لي خريطة , من فضلك ؟	ممكن ترسملي خريطة، لو سمحت؟	ممكن ترسملي خريطة, لو سمحت ؟
هل بإمكاني اللمس ؟	بقدر ألمسه؟	بقدر ألمس؟
يصعب العثور على هذا المكان . إنه في طريق ضيق يتفرع من الطريق الرئيسي .	صعب يلتقى هالمكان. هو بدخلة بتتفرع من الشارع الرئيسي.	بصير نلاقيها مكان. هو بطريق ضيق قريب من الطريق الرئيسي.
هلا أخذت هذه السراويل ؟	ممكن توخذ هاي البنطلونات؟	ممكن توخذ هاي السراويل؟
حسنا . إنها تتكلف خمسة وثمانون دولارا في البريد العادي وثلاثة دولارات في التوصيل الخاص .	طيب. بتكلف خمسة وثمانين دولر بالبريد العادي وثلاث دولرات بالتوصيل الخاص.	ماشي. بتتكلف خمسة وثمانين دولار بالبريد العادي وثلاث دولارات بالوصل الخاص.
إذاً يمكنني بكل ثقة أن أزكي برج مدينة سان فرانسيسكو . فهذا يعطيك فكره عن سان فرانسيسكو .	يعني بنصحك عالأكيد ب برج مدينة سان فراسيسكو. رح يعطيك لمحة عن سان فرانسيسكو.	طبعا بقدر أقدر أزكي برج سان فرانسيسكو. هاظ يعطيك فكره عن سان فرانسيسكو.
لدي تقدير كبير للموسيقى الكلاسيكية .	كثير بقدر الموسيقى الكلاسيكية.	عندي تقدير كبير للموسيقى الكلاسيكية.
من فضلك استعمل غرفة القياس هناك .	من فضلك استخدم غرفة القياس هنيك.	لو سمحت استعمل غرفة القياس هناك.
سر في نفس الاتجاه حوالي خمس دقائق ثم لف لجهة اليسار .	امشي بنفس الاتجاه حوالي خمس دقايق و بعدين ارجع على الشمال.	مشي نفس الطريق حوالي خمس دقايق بعدين لف على الجهة الشمال.
هل أجعله يعاود الاتصال بك عندما يعود ؟	بتحب أخليه يرجع يرنلك بس يرجع؟	بخليه يرجع ياتصالك لما يرجع؟
من المرجح أن محبا للإبداع الفني مثلك سيستمتع اللوحات الزيتية غير التقليدية وعروض الموسيقى بالشوارع .	متوقع من محب للابداع الفني مثلك راح ينبسط باللوحات الزيتية والموسيقى وعروض الموسيقى بالشوارع.	شكله انو حدا بحب إبداع الفني زيك رح يعجبك اللوحات الزيتية غير التقليدية وعروض الموسيقى بالشوارع.
هل رشحت لي رحلة قصيرة ؟	هل اخترتلي رحلة قصيرة؟	رشحتلي رحلة قصيرة؟
إنها سبعة عشر ايه . اوه ، انا آسف . لقد أخطأت .	هي سبعتعشر ايه . اوه ، أني آسف . غلطت	هي سبعة عشر ايه. اوه ، انا آسف. غلطت.
كم المدة التي قضتها هي حتى الآن في المملكة المتحدة ؟	قديش المدة اللي عاشتها بإنجلترا؟	قديش قضيتها هسا بالمملكة المتحدة؟
هل قرّرتَ ؟	قررت؟	قررت؟
هل نذهب إلى أي مكان متحدثين مثل ذلك ؟	راح نظل نحكي هيك وين ما نروح؟	بنروح على أي مكان متحدثين زي هيك؟
سأذهب كي أسأل البواب عن الأجرة المناسبة .	رايح اسأل البواب عن الأجرة الصحيحة.	رح أروح بدي أسأل البواب عن الأجرة المناسبة.
اللون البني محبب هذا العام .	اللون البني مرغوب هالسنة.	اللون البني كثير حلو هاد العام.
هناك قطع في بلوزتي . أتساءل هل يمكنك أن تخيطيه لي ، من فضلك ؟	في مزع ببلوزتي. بدي اسألك اذا بتقدر تخيطلي اياه، لو سمحت؟	في قطع ببلوزتي. بتتسأل ممكن تخيطلي ، لو سمحت؟
هل هذه هي آخر محطة ؟	هاظا آخر موقف؟	هاي آخر محطة؟
هل يمكنني تركها في أي مكان من البلاد ؟	بقدر أسيبها بأي مكان بالبلد؟	بقدر أتركها بأي مكان من البلاد؟
أريد بعض التفاح ، من فضلك .	بدي شوية تفاح، لو سمحت.	بدي شوية تفاح، لو سمحت.
أخشى أن لا يكون هنا أية دورة لتعليم الجولف .	خايف ما يكون في دورة لتعليم الجولف	خايف ما يكون هون أي دورة تعليم الجولف.
دعني أحول هذه المكالمة إلى المسئول .	خليني أحوّل هاي المكالمة للمسؤول.	خليني احول هاي المكالمة للمسئول.
هل يمكن أن تحجزوا في العرض ؟	ممكن تحجزولي بالعرض؟	ممكن تحجزوا بالعرض؟
أنا أقيم في فندق هيلتون .	أنا قاعد بفندق الهلتون.	أنا بسكن بفندق هيلتون.
أحب هذه الخدمة بتقديم شامبانيا للتحية بعد الإقلاع . دعني أشرب فى صحتك .	بحب هاي خدمة توزيع شامبانيا للترحيب بعد ما نطير. خليني أشرب بصحتك.	بحب هاي الخدمة بتقديم شامبانيا للتحية بعد ما اطلع. خليني اشرب صحتك.
ما هو الحد الأدنى للعمر لفعل ذلك ؟	إيش أقل عمر مسموح يعمل هيك؟	شو هو الحد الأدنى للعمر عشان اعمل هيك؟
إلى فندقي ، من فضلك ، إن عنوان فندقي في هذه الورقة .	للفندق تبعي، لو سمحت، العنوان تبع الفندق ع هالورقة.	لفندقي ، لو سمحت ، عنوان فندقي بهاي الورقة.
أريد لقاء السيد ويليم .	بدي أشوف الأستاذ ويليم.	بدي أشوف الاستاذ ويليم.
النبيذ ليس باردا بشكل كافي . هل نمكنك أن تجعله أكثر برودة ؟	الواين مش بارد كفاية. ممكن تبرده اكثر؟	النبيذ مش باردا كثير. بتقدر تخلي ياه أكثر برودة؟
بكم هذا العطر ؟	بقديش هاظا العطر؟	بكم هاظ العطر؟
بالتأكيد سوف ترسلهم ، أليس كذلك ؟	أكيد راح تبعتثم، صح؟	أكيد رح ترسلهم، صح؟
أسف ، هذا المكان محجوز بالفعل .	آسف، هاذ المكان محجوز فعلاً.	أسف ، هاظ المكان محجوز فعلا.
من فضلك أعطني بعض النقود الفكة .	لو سمحت أعطيني شوية فراطة.	لو سمحت أعطيني شوية دولار فكة.
لا أعرف شيئاً عن هذا الأمر .	ما بعرف إشي عن هالشغلة.	ما بعرف اشي عن هاظ الأمر.
حفلتك مقامة الآن . تفضل .	حفلتك مبلشة هسا. تفظل.	حفلتك جاهزة هسا. تفضل.
أخطط للبقاء لمدة اثنا عشر يوماً .	بخطط أظل اثنعشر يوم.	بخطط أظل لمدة اثنعش يوم.
يوجد الكثير من السائحين بالقرب من المبنى ، ويبدو أنهم تجمعوا لإلقاء نظرة على ما يحدث .	في كتير سواح حوالين البناية، شكلهم متجمعين عشان يشوفوا شو اللي بصير.	في كثير من السياح قريب من المبنى، شكلهم قاعدوا لشوف شو بصير.
هل لك أن تقدر التكلفة قبل أن تبدأ العمل فيها ؟	ممكن تقدر قديش بكلف قبل ما تبدا شغل فيه؟	بتقدر تقدر تقدر التكلفة قبل ما تبدأ العمل بهاي؟
نعم . تم نقل أمتعة شخص آخر إلى غرفتي تواً . من فضلك ، هل من الممكن أن تقوم بفحصها ؟	اه، في شناتي لحدا ثاني وصلت غرفتي هسا.لو سمحت، ممكن تشوفها؟	اه. نقلت اغراض حدا ثاني لغرفتي. لو سمحت, بتقدر تفحصها ؟
أريد أن أحصل على تعويض لذلك .	أنا بدي اوخد تعويض عن هاظ.	بدي تعويض لهيك.
بالتأكيد , كن على راحتك .	أكيد، كون على طبيعتك	أكيد, كن على راحتك.
إن ثمة خطأ ما في بطاقة المفتاح هذه ، أعطني غيره ، من فضلك .	فيها غلطة شكلها بالكارت هاي، عطني وحدة ثانية، الله يخليك.	في غلط في بطاقة المفتاح هاي ، أعطيني غيره ، لو سمحت.
من فضلك اتصل لي برقم ثلاثة اثنان ستة اثنان تسعة واحد ثمانية .	لو سمحت، رنلي على الرقم ثلاثة اثنين ستة اثنين تسعة واحد ثمانية.	لو سمحت رنلي على رقم ثلاث اثنين ستة اثنين تسعة واحد ثمنية.
أين مدخل مترو الأنفاق ؟	وين دخلة المترو؟	وين مدخل مترو الأنفاق؟
معذرة . ولكني أريد تسليم تقرير السرقة .	معلش، بس بدي أسلم تقرير السرقة.	معلش، بس بدي أسلم تقرير السرقة.
هذا المقاس ، الذي تسميه المقاس العادي ، سوف تجده هنا .	هاذ الحجم ، اللي بتسميه حجم عادي، راح تلاقيه هون .	هاظ المقاس ، اللي تسميه المقاس العادي ، رح تجده هون.
إنه رديء الصنع .	هو مش صنوع منيح.	هو حلو الصنع.
هل يمكن أن تخبرني عن ساعات العمل ؟	ممكن تحكيلي عن ساعات الشغل؟	ممكن تحكيلي عن ساعات العمل؟
اعطني شهادة طبية , من فضلك .	عطيني وصفة طبية ، لو سمحت .	اعطيني شهادة طبية, لو سمحت.
ليس معي فكة صغيرة .	ما معي فراطة.	ما معي فكة صغيرة.
هل يمكن أن أرى هذا ؟	ممكن أشوف هاظا؟	بقدر اشوف هاظ؟
ليس لدى أي شئ لكي أعلنه .	ما عندي أي اشي عشان أعلنه.	ما عندي أي اشي عشان أعلنه.
أعتقد أنني تركت كاميرتي وغادرت عندما كنت أتناول العشاء هنا الليلة الماضية .	بظن اني تركت كميرتي و روحت لما كنت اكل هون امبارح عالعشا.	شكله اني تركت كاميرتي ورجعت لما كنت أكل العشا هون الليلة الماضية.
دعنا نجتمع لنبحث الأمر أكثر .	خلينا نلتقي عشان اناقش هاظ الموضوع أكثر.	خلينا نجتمع ندور على الموضوع أكثر.
هيه ، هذا فستان جميل حقا .	مرحبا ، هاذا فعلا فسطان حلو.	هيه، هاظا فستان حلو كثير.
من فضلك كن صديقي بالمراسلة .	من فضلك, كون صاحبي عالتواصل.	لو سمحت كن صاحبي بالمراسلة.
أعطني خمسين ، من فضلك .	اعطيني خمسين ، إذا سمحت.	أعطيني خمسين، لو سمحت.
ما هذا المكان الذي نمر به الآن ؟	شو هالمكان اللي بنمر فيه هسا؟	شو هاظ المكان اللي بنمر فيه هسا؟
هل لي في استعارة بعض البياضات ؟	ممكن أستعير شرارشف؟	ممكن أستعير شوية بياضات؟
أوه , يبدو كأنه قرعة .	أوه، شكله قرعة .	ايوه, شكله قرعة.
اشعر كأن هناك تحديق في . هل من النادر رؤية شخص ياباني ؟	حاسك بتسرح فيه. لهاي الدرجة قليل تشوف واحد ياباني؟	حاس انه في تحديق في. بتقدر تشوف حدا ياباني؟
سنبعث لك بالبريد عشرين عينة إضافية .	رح نبعتلك عالبريد عشرين عينة زيادة.	رح نعطيك بالبريد عشرين عين زيادة.
إن الرصيف رقم خمسة يقع هناك .	الرصيف رقم خمسة موجود هناك.	الرصيف رقم خمسة موجود هناك.
أين يوجد مكان لطيف لقضاء نزهة ليوم واحد ؟	وين بلاقي مكان لطيف أظل فيه رحلة ليوم واحد؟	وين مكان مناسب لقضاء نزهة ليوم واحد؟
يا سيد كاواي لدينا مائدة لك الآن . تفضل من هنا .	يا أستاذ كاواي، عنا طاولة الك حاليا. تعال من هون.	يا سيد كاواي عنا طاولة لك هسا. تفضل من هون.
لا توجد مشكلة . إذا حضرت في الخامس من سبتمبر ، فسيكون بإمكانك الاستمتاع بعرض فيلم علمي لأن عندنا يوماً خاصاً مفتوحاً أول يوم جمعة من كل شهر .	ما في مشكلة. اذا اجيت بخمسة تسعة ، بتقدر تستمتع بالفلم العلمي لأنه احنا عنا يوم مميز مفتوح بأول جمعة من كل شهر.	ما في مشكلة. اذا حضرت بخمسة من شهر خمسة، بتقدر تشارك فيلم علمي لأنه عندنا يوم خاص مفتوح أول يوم جمعة من كل شهر.
هل بإمكاني الحصول على طبق آخر مثل هذا ؟	بقدر آخذ صحن ثاني مثل هاذ؟	بقدر اخد اكل ثاني زي هاظ؟
لا تهتم . على أي حال ، خذني من فضلك إلى مركز الحي الصيني . سأحاول أن أجده بنفسي .	ما تشيل هم. يلا، خذني لو سمحت لمركز الحي الصيني. راح احاول ادور الجهة وحدي.	ما بتحب. اغلبك ، خذني لو سمحت على مركز الحي الصيني. رح أحاول أعمل فيه بنفسي.
أهه ، هيا . دولارين فقط .	اها، يلا. بس دولارين.	أه ، يلا. دولارين بس.
سندويتشان برجر بالجبن ، من فضلك .	اثنين برجر بالجبنة، لو سمحت.	سندويتشان برجر بالجبن ، لو سمحت.
أرغب في كريم مسائي للبشرة .	بدي كريم ليلي للبشرة.	بدي كريم مسائي للبشرة.
متى سنقلع ؟	أميت راح نقلع؟	متى رح نقلع؟
هذا طيب ، على ما يبدو .	هاذ طيب ، من شكله.	هاظ كويس ، شكله.
حسنا , الوقت متأخر إلى حد ما . أعتقد أنني يجب على أن أغادر الآن . شكرا جزيلا لك على الأمسية الرائعة .	ماشي, الوقت صار متأخر شوي. بظن انو لازم اروّح هسا. كتير شكرا على الليلة الممتعة.	تمام, الوقت متأخر شوي. بتوقع لازم أطلع هسا. شكرا كثير الك على الأمسية الممتازة.
لقد سقطت من على درجات السلم .	وقعت من على درج السلم	وقعت من على درجات السلم.
هذه السن في المقدمة تؤلمني .	هالسنة في الامام بتوجعني.	هاي السن بالمقدمة بتؤلمني.
من أي نوع من الجلد الصناعي صُنعت حقيبة السفر هذه ؟	شو نوع الجلد الاصطناعي المصنوع منه شنطة السفر هاي؟	من أي نوع الجلد الصناعي صُنع شنتة السفر هاي؟
أين نشأت سمكات الفراش هذه ؟	من وين جاية سمكات الفراش هاي؟	وين نشيت سمكات الفراش هاي؟
سأخطط لإرسال فواتير حاجياتي اليومية ، لذا من فضلك أخبرني العنوان و اسم الشخص المسئول من فضلك .	رح أبعث فواتير حاجاتي اليومية، عشان هيك لو سمحت أعطيني عنوان واسم الشخص المسؤول.	رح أخطط أرسل فواتير حاجياتي اليومية، لذا لو سمحت احكيلي العنوان و اسم المسؤول لو سمحت.
أريد نسخة من تقرير السرقة .	بدي نسخة من تقرير السرقة.	بدي نسخة من تقرير السرقة.
أريد السفر من شنغهاي إلى هاواي بالباخرة .	بدي أروح من شنغهاي لهاواي عالسفينة.	بدي أسافر من شنغهاي ل هاواي بالباخرة.
جريدة باللغة الإنجليزية ، لطفاً .	جريدة بالانجليزي، لو سمحت.	جريدة باللغة الانجليزية ، لو سمحت.
هل هناك سيارة ليموزين ؟	في سيارة ليموزين؟	في سيارة ليموزين؟
لا أريد واحدة ضخمة .	ما بدي وحدة دفشة.	ما بدي وحدة كبيرة.
أريد فندقاً آمنا يقدم إفطاراً جيدا ، من فضلك ؟	بدي فندق آمن ، بقدم فطور كويس ، لو سمحت ؟	بدي فندق آمنا بقدم فطار كويس ، لو سمحت ؟
أربعة وعشرين دولاراً . هل تريد المزيد ؟	أربعة وعشرين دولار. بدك كمان؟	أربعة وعشرين دولار. بدك المزيد؟
وقعت منى الشوكة . من فضلك أحضر واحدة أخرى .	وقعت مني الشوكة. لو سمحت جبلي وحدة ثانية.	وقعت منى الشوكة. لو سمحت جيبلي وحدة ثانية.
لاحظ الفجوة ، لاحظ الفجوة ، ثم قرب الأبواب ، من فضلك .	لاحظ الفتحة، لاحظ الفتحة ، بعدين قرب الابواب، لو سمحت.	لاحظ الفجوة ، لاحظ الفجوة ، بعدين قرب الأبواب ، لو سمحت.
من فضلك ساعدني أعثر على مرشد يتحدث اليابانية .	لو سمحت ساعدني ألاقي دليل سياحي بحكي ياباني.	لو سمحت ساعدني أطلع على مرشد بحكي ياباني.
ماذا عن هذه النماذج البلاستيكة ؟	شو رأيك بموديلات البلاستك هاي؟	شو بالنسبة لهاي النماذج البلاستيكة؟
دعونا نحتفل ، هكذا قال وآخذني إلى بار . وقال إنه سيُجري مكالمة هاتفية وغادر ولم يعد أبداً وتحملت أنا وحدي عبء فاتورة ضخمة .	"خلينا تحتفل" هيك قال وأخذني على البار. حكى انه رايح يعمل مكالمة وراح وما رجع إجى أبداً وأنا تورطت بفاتورة كبيرة.	دعونا نحتفل، هاد قال وخذني على بار. وقال إنه رح يطلع و ما يرجع ابدا و حطيت أنا وحدي عبء فاتورة كبيرة.
أرغب في خلع أسناني .	أنا حاب أقلع سناني.	بدي خلع أسناني.
أريد منبه ، من فضلك .	بدي منبه، لو سمحت.	بدي منبه ، لو سمحت.
ما توقيت إجراءات مغادرة الفندق ؟	متى منقدر نعمل الاجراءات حتى نطلع من الفندق؟	شو توقيت إجراءات دخول الفندق؟
أريد أن أحصل على استراحة .	بدي أوخذ بريك.	بدي استراحة.
هذه الغرفة اثنان صفر واحد . أريد أن أطلب إفطار الغد .	هاي الغرفة رقم اثنين صفر واحد. بدي أطلب فطور بكرا.	هاي الغرفة اثنين صفر واحد. بدي أطلب فطور بكرة.
هل هذا مصنوع من القطن ؟	هاذ مصنوع من القطن؟	هاظ مصنوع من القطن؟
ما هو مقدار الرسوم للوزن الزائد ؟	قديش الدفع على الوزن الزايد؟	شو الرسوم للوزن الزائد؟
لدي معداتي الخاصة .	عندي أدواتي الخاصة.	عندي معداتي الخاصة.
في غرفة انتظار بالمحطة .	في غرفة انتظار بالمحطة.	في غرفة انتظار بالمحطة.
كيف أستطيع مساعدتك ؟	كيف بقدر اساعدك ؟	شلون بقدر أساعدك؟
ادخل . من فضلك ضعها على المائدة هناك .	أدخل. لو سمحت حطها على الطاولة هنيك.	دخل. لو سمحت حطها على الطاولة هناك.
حسناً . سأتأكد أن حقائبك ستكون هنا .	طيب . راح أتأكد إنه الشناتي رح تكون هون.	ماشي. رح أتأكد انه شناتيك رح تكون هون.
سنأتي في السابعة .	رح نيجي الساعة سبعة.	رح نوصل الساعة سبعة.
حقاً . اليوم هو الأحد ، والأحد هو أسوء الأيام .	فعلاً. اليوم الأحد، والأحد أسوأ الأيام.	تمام. اليوم هو الأحد، والأحد هو أسوء الأيام.
إما أن تصلحها أو تستبدلها ، من فضلك .	يا تصلحها يا تبدلها، لو سمحت.	إما تصلحها أو تبدلها، لو سمحت.
ربما أعطيك إجابة أفضل من تلك بعد عرضين .	يمكن أعطيك جواب أحسن من هاذ بعد ما أشوفه مرتين.	يمكن أعطيك إجابة أحسن من هاي بعد عرضين.
إن ارتفاعه ألفان وأربعمائة متر .	إنو ارتفاعه ألفين وأربعمية متر.	ارتفاعه ألفان وأربعمية متر.
هل يمكن أن أستعيد متعلقات ؟	ممكن أرجع متعلقاتي؟	ممكن أرجع أغراض؟
هل بإمكاني إجراء طلبية ؟	بقدر اطلب؟	بقدر اعمل طلبية؟
إنه خطئي . ليس خطأك .	هاي غلطتي. مش غلطتك.	هو غلطي. مش خطأك.
لا يوجد أي منها .	ما في منهم.	ما في أي منها.
أريد غرفة بمنظر جميل .	بدي غرفة مع إطلالة حلوة.	بدي غرفة بمنظر حلو.
أنا ياباني .	أني ياباني.	أنا ياباني.
هل لديكم دبابيس زينة ذات تصميمات رائعة ؟	عندك بروشات شكلها حلو؟	عندكم دبابيس زينة تصميمات ممتازة؟
يبدوا أنني غير قادر على الحصول على الماء الساخن .	شكله مش قادر يجيب ميّة ساخنة.	شكله مش قادر أجيب مي ساخن.
هلا وقفت معي لالتقاط صورة ؟	بتقدر توقف معي شوي عشان نصور صورة؟	ممكن توقف معي عشان تصور صورة؟
لا أعتقد أن ذلك يناسبني فجلدي جاف إلى حد ما .	ما بعتقد انه هاد بلبقلي، جلدي ناشف كثير.	ما بظن انه هاظ بناسبني فجلدي جاف كثير.
أكون ممتنا جدا لو أخذتني إلى الشاطئ .	راح أكون كثير ممنون لو توخذني لعند الشط.	راح أكون ممتنا كثير لو خذتني على الشط.
هل يمكنني الحصول على تذكرتين درجة ثانية لشيكاغوا , من فضلك ؟	ممكن أحجز تذكرتين لشيكاغو من الدرجة الثانية، لو سمحت؟	بقدر اخد تذكرتين درجة ثانية لشيكاغوا, لو سمحت ؟
أجل ، أنا . لقد كانوا يعيشون بجواري في كاليفورنيا لكنهم انتقلوا إلى فلوريدا منذ عامين . ماذا عنك ؟ هل تسافر بمفردك ؟	أيوه، أنا. كانوا عايشين بحدي بكاليفورنيا بس انتقلوا على فلوريدا من سنتين. شو بالنسبة الك؟ بتسافر لحالك؟	اه ، انا. كانوا يعيشان بجوار بكاليفورنيا بس رجعوا على فلوريدا من سنين. شو بالنسبة إلي ؟ تسافر معك ؟
أنا من طوكيو .	أني من طوكيو.	أنا من طوكيو.
أي منتجات صوفية أخرى ؟	في منتجات صوف ثانية؟	أي منتجات صوفية ثانية؟
هل من الممكن أن تخبرنا كيف تقيم هذه الخطة ؟	ممكن تحكيلنا كيف بتعمل هاي الخطة ؟	ممكن تحكيلي كيف بتقيم هاي الخطة؟
مساء الخير . أهلا .	مسا الخير. أهلين.	مسا الخير. أهلا.
اخرج من ذلك الباب ، وانتظر عند المحطة رقم ستة .	طلع من هاي الباب، و انطر عند المحطة رقم ستة.	طلع من هاد الباب ، و استنى عند المحطة رقم ستة.
سبعاً ، من فضلك .	سبعة، لو سمحت.	سبعة ، لو سمحت.
مهزوز ، وليس مضروب .	محرك، مش مخفوق.	مهزوز، مش مضروب.
ثلاثة أيام .	ثلاث أيام.	ثلاث أيام.
تريد أن تشتري ثوبا .	هي بدها تشتري فسطان.	بدك تشتري ثوبا.
لا ، ليس بعد ، هناك الكثير نختار فيه .	لا، بعده ، في كثير عشان تنقي منه	لا، ما بعد، في كثير بنختار فيه.
سر في خط مستقيم على طول النهر حوالي نصف ميل . ستصل للمتنزه .	إمشي دغري على طول النهر حوالي نص ميل. بتصل المنتزه.	مشي بخط مستقيم على طول النهر تقريبا نص ميل. رح تصل للمتنزه.
أسف أنني بحاجة إلى أن أطلع على أي مستند لتحديد الهوية .	أسف أني بحاجة إني أشوف اثبات هوية.	اسف اني بدي أطلع على أي مستند عشان أعرف الهوية.
كن حذراً ، السقف منخفض .	انتبه ، السقف واطي.	كن حذرا، السقف منخفض.
كم تتقاضى لتطبيع صور الفيلم ؟	قديش بتوخذ عشان تطبع صور الفلم؟	قديش بدك تطبيع صور الفيلم؟
هل يدخل هذا في حدود المعفي من الضرائب ؟	هاظ معفي من الضرايب؟	هاد بدخل حدود المعفي من الضرايب؟
غرفة مفردة بدون دش من فضلك .	غرفة مفردة بدون دش لو سمحت .	غرفة فردية بدون دش لو سمحت.
هل يمكن أن تدلّني أين أجد القنصلية اليابانية ؟	ممكن تحكيلي وين بقدر ألاقي القنصلية اليابانية؟	ممكن تدلني وين القنصلية اليابانية؟
من فضلك ضعها في قمع .	لو سمحت حطها ببوري.	لو سمحت حطها بالقعد.
نصف أوقية من شانيل رقم خمسة من فضلك .	نص أوقية من شانيل رقم خمسة، لو سمحت.	نص أوقية من شانيل رقم خمسة لو سمحت.
شخصان .	شخصين.	شخصي.
هل تعرف ما إذا كان هناك أي فنادق رخيصة الأسعار ؟	بتعرف اذا في أي فنادق رخيصة؟	بتعرف إذا في فنادق رخيصة الأسعار؟
أريد أن أقدم طلباً للحصول على إصدار جديد .	بدي أقدم طلب مشان اخد إصدار جديد.	بدي أقدم طلب عشان أجيب إصدار جديد.
أريد بزة .	بدي سترة.	بدي بزة.
هذا مكلف نوعا ما .	هاي بتكلف شوي.	هاظ مكلف كثير.
لقد طلبت لحما لا سمكا . هل يمكنك تغيير هذا ؟	طلبت لحم مش سمك. ممكن تغير هاي؟	طلبت لحما ما سمكا. بتقدر تغيرلي هاظ؟
عذراً . هل يوجد محل كتب قريب من هنا ؟	عفواً . في مكتبة بتبيع كتب قريب من هون ؟	عفواً. في محل كتب قريب من هون؟
حينئذ سنأخذها .	بهالوقت رح نوخذها.	هسا رح نوخذها.
إنه بعيد جداً . يحسن بك أن تأخذ سيارة أجرة .	هو بعيد كتير. فضل أكيد تاخذ تكسي.	هاد بعيد كثير. بتحبك توخذ سيارة أجرة.
في أي وقت نبدأ ؟	على أي ساعة راح نبلش؟	بأي وقت بنبدأ؟
حسناً . لقد تم التأكيد . هل يمكننا أن نأخذ رقم تليفونك في حالة الحاجة إلى الاتصال بك ؟	ماشي، اتأكدت . بنقدر نوخذ رقمك تلفونك في حال احتجنا نتصل فيك؟	ماشي. أكيد. ممكن نخذ رقم تليفونك اذا لازم ناتصالك؟
حسنا . خصم خمسة في المائة . هل يوافقك لك ؟	ماشي ، خصم خمسة بالمية. بمشي معك؟	ماشي. خصم خمسة بالمية. بتوافقك؟
الآن ، مكالمتك ردت . تفضل من فضلك .	حاليا، مكالمتك رجعت. تفضل لو سمحت.	هسا ، مكالمتك ردت. تفضل لو سمحت.
أوه ، أهي كذلك ؟ كيف تفضلها ؟	أووه، هي هيك؟ كيف بتحبها؟	اوه، هيك؟ كيف بتحبها؟
أنا فقدت أثر بريد مسجّل .	ضيعت أثر رسالة مسجلة.	أنا فقدت أثر بريد مسجّل.
لا أشعر بحالة جيدة . هل ترشدني إلى طبيب ؟	ما بحس حالي ملبح. ممكن ادلني على دكتور؟	مش حاس حالي كويس. ترشدني على دكتور؟
هل أنت ملم بجغرافيا اليابان ؟	إنت ملم بتظاريس اليابان؟	انت ملم بجغرافيا اليابان؟
لا أستطيع رؤية الشاشة جيداً من هنا ، هل يمكنني تبديل المقاعد لبعض الوقت ؟	أنا مش قادر أشوف الشاشة مليح من هون. ممكن نبدل المقاعد شوي؟	مش قادر اشوف الشاشة كويس من هون، بقدر أبدل المقاعد شوي؟
سعر الغرفة هو ستة آلاف ين في الليلة .	سعر الغرفة ست آلاف ين لليلة.	سعر الغرفة ست الاف ين بالليلة.
أعتقد أن سيارتي تستحق حوالي خمسة آلاف دولارا .	أنا بتوقع سيارتي بتسوى حوالي خمس الآف دولار.	بتوقع سيارتي بتقدر تقريبا خمس الاف دولار.
أين حديقة الحيوان ؟	وين حديقة الحيوانات؟	وين حديقة الحيوانات؟
هي تريد بيرة .	هي بدها بيرا .	بدك بيرة.
هل هذه الحقيبة مناسبة لكل حالات الطقس ؟	هاي الشنتة بتناسب كل حالات الجو؟	هاي الشنتة مناسبة لكل حالات الطقس؟
أفضل شيء هو اسطوانة مصغرة .	أحسن اشي هو سي دي صغير.	أحسن اشي هو اسطوانة مصغرة.
فهمت ، في هذه الحالة ليس علىّ أن أدفع أجر التبديلات ، أليس كذلك ؟	فهمت، بهاي الحالة ما عليي أدفع فلوس التبديلات، مش هيك؟	فهمت، في هاي الحالة ما لازم أدفع أجرة التبديلات، صح؟
هل يمكنك أن تريني حجماً أكبر بقليل ؟	ممكن توريني سايز اكبر شوي؟	بتقدر تفرجيني حجم أكبر شوي؟
هل يمكنك بطريقة ما أن تصف لي مرضك بالإنجليزية ؟	بتقدر بأي طريقة تشرحلي مرضك بالإنجليزي؟	بتقدر تحكيلي مرضك بالإنجليزي؟
انتقلنا إلى هذا المنزل منذ عام .	رحلنا لهاظ البيت من سنة.	رجعنا على هاد البيت من عام.
معذرة ، هل يسعني أن أتوجه إليك بسؤال ؟	معلش، بقدر أوجهلك سؤال؟	معلش، بقدر اروح علىيك بسؤال؟
هذا سعر مرتفع ، أليس كذلك ؟	هاظا سعره غالي، صح؟	هاظ سعر مرتفع ، صح ؟
نعم ، ولكن تأكد أن تذكرتك معك .	ايوه، بس تأكد إنه تذكرتك معك.	اه ، بس تأكد إنك تذكرتك معك.
ما رأيك في موضوع التحرش الجنسي في مكان العمل ؟	شو رأيك بالتحرشات الجنسية اللي بتصير بمكان الشغل؟	شو رأيك بالموضوع التحرش الجنسي بمكان العمل؟
أريد تذكرتين ذهاب وعودة إلى أكسفورد .	بدي تذكرتين روحة رجعة على أكسفورد.	بدي تذكرتين روحة ورجعة على أكسفورد.
هل ستذهب إلى المدرسة هنا ؟	رح تروح عالمدرسة هون؟	رح تروح على المدرسة هون؟
أود بعضاً من فيلم رقم ايه إس ايه لهذه الكاميرا ، من فضلك .	بدي فيلم رقم ايه إس ايه لهاي الكميرا، لو سمحت.	بدي شوية فلم رقم ايه إس ايه للكاميرا ، لو سمحت.
أصبت بسحجة .	أني انشخطت.	انبسطت.
أريد تسجيل أمتعتي .	بدي أسجل شنطي.	بدي تسجيل اغراضي.
أريد أن أرى ذاك الذي في نافذة العرض ، من فضلك .	بدي أشوف هاذ الموجود بالواجهة، لو سمحت.	بدي اشوف هاي اللي بجنب العرض، لو سمحت.
ما هي المحتويات ؟	شو المكونات؟	شو هي المحتويات؟
لقد تعطلت سيارتي . من فضلك احضر لتأخذها .	سيارتي خربت. تعال خذها لو سمحت.	ضيعت سيارتي. لو سمحت جيب اياها.
ما النمط الذي في مخيلتك ؟	شو النمط اللي بخيالك؟	شو النمط اللي بخيلتك؟
كيف تسير الأمور ؟	كيف ماشية الأمور؟	شلون بسير الأمور؟
ألا تسأله أن يتصل بي ؟	بتقدر تحكيله يتصل فيّ؟	ما تسأله انه يتصل بي؟
ما الغرض منها ؟	شو الهدف منها؟	شو الغرض منها؟
كيف يربي الآباء اليابانيون أولادهم ؟ هل هم صارمون مع أطفالهم ؟	كيف بيربو الآباء اليابانيين ولادهم؟ همة شديدين مع عيالهم؟	شلون بربي الآباء اليابانيين أولادهم؟ صارمين مع أطفالهم؟
هلا ضغطت على زر مصراع النافذة ؟	ممكن تكبس كبسة الشباك؟	ممكن تضرب على زر مصراع الشباك؟
أيمكنني أن أذهب هناك بمترو الأنفاق ؟	بقدر أروح هناك بالمترو؟	بقدر أروح هناك بمترو الأنفاق؟
دعنا نشاهد التلفزيون . فيها مباراة بيسبول .	خلينا نتفرج على التلفزيون. في مباراة بيسبول.	خلينا نشوف التلزيون. فيها مباراة بيسبول.
حسناً . خذ هذا الاتجاه . من فضلك ، سأوصلك إلى غرفتك .	ماشي، خذ هاي الطريقة. لو سمحت، رح أوصلك لغرفتك.	ماشي. خذ هاظ الطريق. لو سمحت، رح أوصلك على غرفتك.
أريد تمويج متقارب لشعري ، من فضلك .	بدي أعمل شعري كيرلي ، لو سمحت.	بدي تمويج متقارب لشعري ، لو سمحت.
نريد مائدة في الشرفة .	بدنا طاولة على البرندة.	بدنا طاولة بالشرفة.
معدتي ثقيلة .	معدتي كبيرة.	معدتي ثقيلة.
أعد ذلك , من فضلك .	عيدها، لو سمحت.	بدي هيك, لو سمحت.
سآخذ صورة لجاك دانيلز .	راح آخذ صورة لجاك دانيلز.	رح آخذ صورة لجاك دانيلز.
هل لديكم أطباق ذات سعرات حرارية منخفضة ؟ فأنا أتبع نظاما غذائياً حالياً .	عندكو وجبات قليلة الكالوريز ؟ أنا ماشية بدايت هالأيام.	عندكم أكل فيه سعرات حرارية منخفضة؟ أنا بتبع نظام غذائي حالي.
ما هي الفوارق بين هذه الفنادق ؟	شو الفرق بين هاي الفنادق؟	شو الفوارق بين هاي الفنادق؟
لم أقم بالحجز .	ما عملت حجز.	ما حجزت.
هل لديك أية فكة لعداد الانتظار ؟	عندك عملة للبارك ميتر؟	عندك فكة لعداد الانتظار؟
أيهما تفضل , داكن أم فاتح ؟	شو بتحب أكثر, غامق أو فاتح؟	شو بتحب, داكن ولا فاتح ؟
حسناً سيدي . وما الحلو الذي تريد أن تختم به الطعام ؟	طيب يا استاذي.. شو الحلو اللي بدك تختم فيه الأكل ؟	ماشي سيدي. شو الحلو اللي بدك تخلي منه الأكل؟
إنني أسجل لخروجي من الفندق . هلا أرسلت خادماً إلى أعلى ؟	أني بعمل تشيك اوت. ممكن تودي عامل لفوق؟	أنا أسجل عشان أطلع من الفندق. بتقدر ترسل خادم على فوق؟
كيف يمكنني الذهاب إلى ديزني لاند ؟	شلون بقدر أروح على ديزني لاند؟	كيف بقدر أروح على ديزني لاند؟
الآن ، هذه اللوحة خاصة جداً . رسمها تسوروتارو كاتاأوكا . إنه معروف بأنه فنان عالمي .	هسا، هاي اللوحة كثير مميزة. رسمها تسوروتارو كاتاأوكا. معروف هاذ فنان عالمي.	هسا، هاي اللوحة كثير خاصة. رسمها تسوروتارو كاتاأوكا. معروف بأنه فنان عالمي.
هذه المظلة يمكن استخدامها كعصا للسير .	هاي الشمسية بقدر استخدمها كعصاية.	هاي المظلة بقدر استخدامها كعصا للسير.
لأن الصيف في اليابان عادة ما يكون شديد الحرارة ، ولم يكن لدينا تكييف هواء قديماً .	لأنه الصيف باليابان عادة بكون حامي كثير، وما كان عندنا مكيف هوا زمان.	الصيف باليابان عادة ما يكون كثير حرارة، ما كان عنا تكييف هواء قديم.
الشيء نفسه لي ، من فضلك .	ونفس الشي إلي ، لو سمحت.	الشيء نفسه لي ، لو سمحت.
يوم الصحة الرياضية هو يوم العاشر من أكتوبر وهو إجازة قومية الغرض منها تحسين صحة المواطنين .	يوم الصحة الرياضية بعشرة عشرة بكون عطلة وطنية عملوه عشان يرفعوا مستوى الصحة عند الناس.	يوم الصحة الرياضية هو يوم عشرة من شهر عشرة وهو إجازة قومية الغرض منها تحسن صحة المواطنين.
هل من الممكن أن تنظف المنضدة من فضلك ؟	ممكن تنظف الطاولة، لو سمحت؟	ممكن تنظف المنضدة لو سمحت؟
يوجد عصير أناناس وبرتقال وطماطم .	في عصير أناناس و برتقال و بندورة.	في عصير أناناس وبرتقال وطماطم.
أود الإقامة بهذه الغرفة ليلة واحدة أخرى .	بدي أظل بهاي الغرفة ليلة ثانية.	بدي اقعد بهاي الغرفة ليلة وحدة ثانية.
ثمانية دولارات . وهنا تأتي واحدة حالا .	ثمن دولرات. وهون بتيجي وحدة هسا.	ثمنية دولارات. وهون يجي وحدة هسا.
هذا حسن بالنسبة لي . في الواقع أحب أن أدخن .	هاذ تمام بالنسبة إلي . بصراحة أني بحب أدخن.	هاظ حسن بالنسبة الي. بالواقع بحب أدخن.
المكان كان على كرسي في البهو .	المكان كان عكرسي باللوبي.	المكان كان على كرسي بالبهو.
أشعر بصداع خفيف .	حاس بصداع خفيف.	حاس بصداع خفيف.
ألو ، اسمي أودا . عندي حجز الليلة ، لكن سوف أتأخر في القدوم . لهذا من فضلك اتركوا لي الحجز .	مرحبا، اسمي أودا. عندي حجز هالليلة، بس راح يتأخر وصولي. يرجـى خليكو الحجز لي.	ألو ، اسمي أودا. عندي حجز الليلة, بس رح أتأخر بالانتظار. لهيك لو سمحت اتأكد ارنلي الحجز.
أين قسم السفر ؟	وين قسم السفر؟	وين قسم السفر؟
هل لديك أي صورة لبطاقة هوية ؟	عندك اي صورة للهوية؟	عندك صورة لبطاقة هوية؟
هل لك أن تعطيني إشارة بالضوء عندما تكون فيها ؟	بتقدر تعطيني إشارة بالضو لما تكون فيها؟	ممكن تعطيني إشارة بالضو لما تكون فيها؟
أريد فحص هذه الحقائب المتجه إلى طوكيو , من فضلك .	بدي اتفقد هالشناتي اللي رايحة لطوكيو، لو سمحت.	بدي أحص هاي الشنتات اللي رايح على طوكيو, لو سمحت.
ثمة شئ خطأ في آلة التهوية هذه .	في اشي غلط بالمروحة هاذ.	في اشي غلط بالآلة التهوية هاي.
منذ هذا الصباح .	من الصبح.	منذ هاظ الصبح.
من فضلك قس حجم حذائي .	لو سمحت قيس حجم كندرتي.	لو سمحت قس حجم حذائي.
أوافق . إنه أحد الأماكن المفضلة لي .	موافق. هاذ واحد من احلا الاماكن عندي.	وافق. هو أحد الأماكن اللي بتحبها.
لابد أن تكون هادئة .	لازم تكوني هادية.	لازم تكون هادية.
أريد مطفأة سجائر .	بدي منطفة سجاير.	بدي طاولة سجاير.
أود أن أتتناول طبقا مثل هذا .	بدي أوكل صحن زي هاظ.	بدي أكل مثل هاظ.
أين توجد أقرب مغسلة ؟	وين اقرب مغسلة؟	وين أقرب مغسلة؟
هل لي بجدول مواعيد ؟	أعطيني جدول المواعيد؟	ممكن تعطيني جدول ؟
من فضلك اعطني هذه .	لو سمحت اعطيني هاي.	لو سمحت اعطيني هاي.
هل يمكن أن أذهب لمشاهدة المعالم أثناء رسو السفينة في الميناء ؟	بقدر أروح اشوف المناظر لما السفينة تكون راسية بالمينا؟	بقدر أروح أشوف المعالم لما رسوم السفينة بالمينا؟
هل يوجد مكان يقبل تنظيف الملابس في أيام الآحاد ؟	في أي مكان بقبل طلبات الغسيل كل يوم أحد؟	في مكان بقبل تنظيف الملابس بأيام الاحد؟
هل توجد خدمة نقل بالحافلات إلى متحف فورد ؟	في خدمة باصات بتروح على متحف فورد؟	في خدمة نقل بالحافلات لمتحف فورد؟
أنا من النرويج .	أني من النرويج.	أنا من النرويج.
عشرة طوابع من فضلك .	عشر طوابع لو سمحت.	عشر طوابع لو سمحت.
هل يمكنك أن تجر سيارتي ؟	ممكن تجرب سيارتي؟	بتقدر تمشي سيارتي؟
إنه سمك ثعبان مشوي مع مرقة خاصة فوق سلطانية من الأرز .	هاذ سمك الانقليس مع صلصة خاصة محطوطة فوق سلطانية الرز.	سمك ثعبان مشوي مع مرقة خاصة فوق سلطانية من الأرز.
هل يمكنني إعادتها في مدينة مختلفة ؟	بقدر أرجعها بمدينة ثانية؟	بقدر أرجعها بمدينة مختلفة؟
عندي الدواء الخاص بي .	عندي الدوا تاعي.	عندي دوا خاص بي.
هل لديكم أفلام للصيف ؟	عندكو أفلام للصيف؟	عندكم أفلام للصيف؟
هل تريد أن تذهب للتسوق معي بعد الظهر ؟	بتحب تيجي معي نتسوق بعد الظهر؟	بدك تروح تسوق معي بعد الظهر؟
نعم ، سيدي . كيف تريدني أن اقطعها ؟	أيوة ، يا سيدي . كيف بدك إني أقصها؟	اه ، سيدي. كيف بدك اقطعها ؟
عندما أعود ثانية إلى اليابان ، سأكتب خطاباً . وإذا كان لديك وقت ، من فضلك أرسل لي خطاباً .	لما أرجع مرة ثانية لليابان، رح أكتب رسالة. وإذا كان عندك وقت، تكرم ابعثلي انا رسالة.	لما ارجع مرة ثانية لليابان، رح أكتب خطاب. وإذا عندك وقت، لو سمحت ارسملي خطاب.
فراولة ، من فضلك .	فراولة، لو سمحت.	فراولة ، لو سمحت.
هل تفضل ماسكات للشعر أصغر أم أكبر ؟	بتحبي القناع للشعر أصغر ولا أكبر؟	بتحب كريم شعر أصغر ولا أكبر؟
بالتأكيد . متى تود أن تلعب جولف ؟	طبعاً. أميت بدك تلعب جولف؟	أكيد. متى بدك تلعب جولف؟
من فضلك اجعل الجزء العلوي أطول قليلاً .	من فضلك خلي الجزء الفوقاني أطول شوي.	لو سمحت اخلي الجزء العلوي أطول شوي.
كم أوقية من العطر أستطيع الحصول عليه من غير رسوم ؟	كم وقية من العطر بقدر أوخذها بدون رسوم ؟	قديش بقدر أجيب عطر من غير رسوم؟
معذرة , قم بالضغط على مصراعي النافذة الخشبيين , من فضلك .	عفواً، نزل اباجور الشباك الخشب , لو سمحت.	معلش، حط على الستارة الخشبيين, لو سمحت.
لدي ثلاث حقائب .	عندي ثلث شناتي.	عندي ثلاث شنات.
هذا البيت يبدو مريحا للمعيشة فيه , أليس كذلك ؟	هاد البيت مبين كثير مريح العيشة فيه، مش هيك؟	هاظ البيت شكله مريح للمعيشة فيه, صح ؟
أريد أن أغسل ملابسي في وقت لاحق اليوم .	بدي أغسل وعيتي بوقت ثاني اليوم.	بدي اغسل ملابسي بوقت ثاني اليوم.
أرجو ذلك .	بتمنى هيك.	شكراً.
واحد لنيويورك ، من فضلك .	واحد لنيويورك، إذا سمحت.	واحد لنيويورك ، لو سمحت.
لا ، إنها لا تشمل الضريبة ومصاريف الخدمة .	لا، هي ما بتشمل الضريبة ومصاريف الخدمة.	لا، ما تشمل الضرايب ومصاريف الخدمة.
قم بها بطريقتك .	اعملها بطريقتك.	مشي بها بطريقتك.
كم تستغرق مشياً على الأقدام ؟	قديش بتوخذ وقت مشي عالجرين؟	قديش بدك مشي قدام؟
هل يمكنني الحصول على برنامج ؟	بقدر آخذ برنامج؟	بقدر اخد برنامج؟
من فضلك سجل عنوان الاتصال بك هنا .	من فضلك اكتب عنوانك للتواصل معك هون.	لو سمحت سجل عنوان التلفون هون.
نعم ، يا سيد تاناكا هناك رسالتان لك .	أيوة، يا سيد تاناكا، في عندك رسالتين.	اه ، يا سيد تاناكا هناك رسالتين لك.
هل لي في شيء من لحم الخنزير والبيض ؟	ممكن شوية من لحم الخنزير والبيض؟	ممكن أخذ اشي من لحم الخنزير والبيض؟
إذا حدث ذلك ، من فضلك أتصل بي .	اذا صار هيك ، لو سمحت رنلي .	اذا صار هاد ، لو سمحت رنلي.
أوه ، آسف لأني أزعجتك .	اووه، معذرة الك ازعجتك.	ايوه، آسف لأني أزعجتك.
هل يمكن أن أقيس مقاس تسعة .	ممكن أقيس مقاس تسعة ؟	ممكن أقيس مقاس تسعة؟
ملابسه دائماً موضة قديمة .	هدومه دايما موضة قديمة.	ملابسه دائما موضة قديمة.
هلا حجزت لي تاكسي الساعة السادسة صباح غد , من فضلك ؟	ممكن تحجزلي تكسي الساعة ستة الصبح لبكرا ، لو سمحت؟	ممكن حجزتلي تاكسي الساعة ستة الصبح بكرا, لو سمحت ؟
إنه صحيح هنا .	هو صحيح هون.	هو صح هون.
هل يمكن أن تدخل معه فكة صغيرة ؟	بتقدر ادخل معه شوية فراطة؟	ممكن تدخل معه فكة صغيرة؟
أنا حقا آسف .	أني جد آسف.	أني حقا آسف.
لقد طلبت ذلك .	طلبت هاظ.	طلبت هاظ.
ما تكلفة هذا في اليوم ؟	قديش تكلفته ليوم واحد؟	قديش بتكلف هاي باليوم؟
لا توجد أية مشاكل .	ما في أي مشاكل.	ما في مشاكل.
أجل . سنصل في الثامنة حسب التوقيت المحلي .	أها. رح نوصل الساعة ثمنية بالتوقيت المحلي.	أه. رح نوصل الساعة ثمنية بالتوقيت المحلي.
هل لديك واحد أكبر ؟	عندك واحد أكبر؟	عندك واحد أكبر؟
أنا كينجي .	أني كينجي.	أنا كينجي.
إنه المبنى الثاني على يسار هذا المبني الأبيض .	البناية الثانية على يسار البناية البيضا.	هو المبنى الثاني على يسار هالمبني الأبيض.
أعطني قطعة لحم الخنزير هذه ، ولكن ليس بسمك تلك .	أعطييني قطعة لحمة الخنزير هاي، بس ما تكون سميكة مثل هذيك.	أعطيني قطعة لحم الخنزير هاي ، بس مش بسمك هاي.
لدي موعد آخر .	عندي موعد ثاني.	عندي موعد ثاني.
لدي غرفة جاهزة لك في جراند هويتل . هل تستطيع الذهاب إلى هناك ؟	عندي غرفة جاهزة إلك بالجراند هوتيل. بتقدر تروح لهناك؟	عندي غرفة جاهزة لك بجراند هويتل. بتقدر تروح هناك؟
أرني واحدة لإحدى الشابات .	وريني وحدة لوحدة من الصبايا.	فرجيني وحدة لأحد الشابات.
أود أن أحجز غرفة لهذه الليلة .	بدي أحجز غرفة لهاي الليلة.	بدي أحجز غرفة لهاي الليلة.
لقد خلعت البنطلون .	شلحت البنطلون.	خلعت البنطلون.
إنها رائعة .	هاي روعة.	هي ممتازة.
أهذه هي الحافلة التي توصل إلى وسط المدينة ؟	هاظ هو الباص اللي بوصل لوسط البلد؟	هاي هي الباص اللي توصل لوسط البلد؟
أتظن ذلك ؟	بتظن هيك؟	بتوقع هيك؟
أود أن أرسله عن طريق البريد .	حاب أبعثه عن طريق البريد.	بدي ابعثه عن طريق البريد.
أشكرك ثانية لأنك ذكرتني . هل يميل كثير من الناس أن ينسوا توقيع أسمائهم ؟	بشكرك مرة ثانية عشان ذكرتني. بروح كثير من الناس تنسى توقع ع أسمائهم ولا شو؟	شكرا الك مرة ثانية لأنك ذكرتني. بميل كثير من الناس ينسوا توقيع اسمائهم؟
هلا أرسلت تاكسي إلى المدخل الرئيسي لـ ويستمانستر مول ؟	ممكن تودي تكسي للمدخل الرئيسي بويستمانستر مول؟	ممكن تبعث تاكسي على المدخل الرئيسي لـ ويستمانستر مول؟
هل لديكم أية جولة سياحية أخرى ؟	عندك أي رحلة ثانية؟	عندكم جولة سياحية ثانية؟
السيارة تصدر صاخبا غريبا .	السيارة بطلع صوت غريب وعالي.	السيارة بتصدر صاخبة غريبا.
هذه سبعون دولار .	هاي سبعين دولار.	هاي سبعين دولار.
أنا شديد الحساسية للقطط .	أني بتحسس كثير من البسس.	أني كثير حاسة للقطط.
لا . قليلاً في الأمام . هناك ، نعم .	لا. شوي لقدام. هناك، إيوه.	لا. شوي قدام. هناك ، اه.
ركن المدخنين ، من فضلك . وشباك بجوار النافذة ، من فضلك .	ركن الشيشانيين، إذا سمحت. وشباك جمب النافذة، إذا سمحت.	ركن المدخنين ، لو سمحت. وشباك جنب الشباك ، لو سمحت.
هل يكلفني دخول هذا المبنى أي أموال ؟	بدفع أي مصاري إذا فتت على هاي العمارة؟	بقدر ادخل هاظ المبنى أي أموال؟
سأكون هنا حتى التاسعة . يحدوني الأمل أن تتمكن من القبض على المجرم في أقرب وقت ممكن .	راح أظل هون للساعة تسعة. بتمنى إنكم تمسكوا المجرم بأسرع وقت.	رح أكون هون للساعة تسعة. بقدر تقدر تقدر تجيبلي الشناتي بأقرب وقت ممكن.
شكراً لك . من فضلك عاود مرة أخرى .	مشكور. يلا جرب مرة ثانية من فضلك.	شكراً الك. لو سمحت رجع مرة ثانية.
فاتتني محطتي .	راح علي الموقف.	فاتتني محطتي.
أين يمكنني أن أقيم أثناء الجولة ؟	وين ممكن أسكن خلال الرحلة؟	وين بقدر اقعد أثناء الجولة؟
إنه لمن دواعي السرور أن أتحدث معك .	إنسريت بالحكي معك.	هو لازم أحكي معك.
أي مقاس تريد ؟	شو السايز اللي بدك ياه؟	شو المقاس بدك؟
بالتأكيد ، هل تريد تسريحة متموجة دائما ؟	أكيد، بدك اياه كيرلي دايما؟	أكيد، بدك تسريحة متموجة كثير؟
إلى اليسار ، من فضلك .	على اليسار، لو سمحت.	لليسار ، لو سمحت.
لقد أتلفت حقيبتي .	دمرت شنتتي.	حطيت شنتتي.
البيتزا لذيذة . من صنعها ؟	هاي البيتزا زاكية. مين عملها؟	البيتزا حلوة. من صنعها؟
أخشى أن أسأل ، لكن ماذا تعني ؟	بخاف اسأل، بس شو قصدك؟	خايف أسأل، بس شو تعني؟
لا ، من فضلك اجلس وانتظر . سأعود بعد قليل .	لا، لو سمحت اقعد واستنى. راح أرجعلك بعد شوي.	لا، لو سمحت وقف و استنى. راح أرجع بعد شوي.
الكعب مرتفع جداً .	الكعب عالي كثير.	الكعب كثير قوي.
كم سيستغرق إصدار التأشيرة لي ؟	قديش الفيزا بدها وقت عشان تطلع؟	قديش رح يخذ التأشيرة الي؟
لقد تعطلت سيارتي .	خربت سيارتي .	ضيعت سيارتي.
كيف أثر الركود على الشركة ؟	شلون أثر الركود عالشركة ؟	شلون أثر الركود على الشركة؟
توجد رحلات جوية على شركات جال وانا التي تقلع في الساعة العاشرة وخمسة وخمسين دقيقة . ولكن , للأسف كلتا الرحلتين محجوزتان .	في طيارات على شركات جال وانا اللي بتغادر الساعة عشرة وخمسة وخمسين دقيقة. بس، للأسف الطيارتين مفللات.	في رحلات جوية على شركات جال وانا اللي بتتقلع الساعة عشرة وخمسة وخمسين دقيقة. بس, للأسف كل الرحلات محجوزة.
هل هذا سيفسد ؟	هاذ رح يخرب؟	هاظ رح يزيد؟
هل يمكنك أن تخبرني بقيمة هذه المكالمة ؟	بتقدر تحكيلي تكلفة هاي المكالمة؟	بتقدر تحكيلي كم سعر هاي المكالمة؟
من الأفضل أن تضبط المرآة العاكسة للرؤية الخلفية .	أحسن شي تزبط المراية الخلفية.	لازم تخلي المرآة العاكسة لمشاهدة الخلفية.
كم أجرة التاكسي حتى هذا الفندق ؟	كم أجرة التكسي لعند الفندق؟	قديش أجرة التاكسي لهاي الفندق؟
أريد مزيلا لطلاء الأظافر .	بدي أسيتون للمناكير.	بدي مزيلا لطلاء الأظافر.
ما هي مكونات هذا الطبق ؟	شو مكونات هالصحن؟	شو مكونات هاظ الطبق؟
متى ينبغي أن آتي ؟	متى لازم آجي ؟	متى لازم آتي؟
هل يمكن أن تخبرني عن الأماكن الشيقة هنا ؟	ممكن تحكيلي عن الأماكن الحلوة هون؟	ممكن تحكيلي عن الأماكن الشيقة هون؟
حسنا ، اضغط تسعة وصفر واحد واحد ، ثم الكود الخاص بالبلد ورقم الهاتف .	طيب، إكبس تسعة وصفر واحد واحد، وبعدين الكود تبع البلد ورقم التلفون.	ماشي، اضغط تسعة وصفر واحد واحد، بعدين الكود الخاص بالبلد ورقم التلفون.
أعتقد أنك ارتكبت خطأً . الغرفة دفع ثمنها مسبقاً . معي إيصال .	بظن إنك غلطت. الغرفة حاسبت عنها قبل. معي وصل.	بتوقع إنك انك انكبت غلط. الغرفة دفعتها قبل ما. معي وصل.
هل يمكنك أن تتحرك بهذا الاتجاه ؟	بتقدر تمشي بهالجهة؟	بتقدر تتحرك بهاد الطريق؟
سيغادر قطارك من الرصيف رقم ثمانية .	رح يطلع قطارك من السكة رقم ثمانية.	رح يطلع قطارك من الرصيف رقم ثمانية.
أريد غرفة أخرى .	بدي غرفة ثانية.	بدي غرفة ثانية.
لماذا يحدث هذا ؟	ليش بصير هاذ ؟	ليش بصير هاظ؟
ما الرقم الذي أطلب منه هنا ؟	شو الرقم اللي بطلب منه هون؟	شو الرقم اللي طلب منه هون؟
هل يوجد مطعم أرخص قريب من هنا ؟	في مطعم رخيص قريب من هون؟	في مطعم أرخص قريب من هون؟
هل يوجد مطعماً يمكنك أن تزكيه بالقرب من هنا ؟	في مطعم بتنصح فيه قريب من هون؟	في مطعم بتقدر تزكيه قريب من هون؟
أوبرا ميتروبوليتان .	أوبرا المتروبوليتان.	أوبرا ميتروبوليتان.
أين المصعد ؟	وين الأصنصير؟	وين المصعد؟
هل يمكنك أن ترني أشياء أخري ذات تصميمات مختلفة .	ممكن توريني شغلات ثانية بأشكال غير؟	بتقدر تفرجيني أشياء ثانية ذات تصميمات مختلفة.
ليس بمقدورك تغيير وظيفتك بسهولة .	ما بتقدر تغير شغلك ببساطة.	مش ممكن تغيرلي وظيفتك بسهولة.
ماذا تسمون هذا بالإنجليزية ؟	شو بتسموه هاذ بالإنجليزي؟	شو تسمون هاي بالإنجليزي؟
سأصل في التاسع من مارس وأغادر في الرابع عشر .	راح أوصل بتسعة ثلاث وراح أروّح بأربعطعش.	رح أوصل ب تسعة من شهر تسعة و رح أطلع بأربعطعش.
هل ستحدد موعداً للخروج معي ؟	بدك تحدد موعد لتطلع معي؟	رح يغيرلي موعد للخروج معي؟
لم اسمع بهذا العنوان من قبل بالقرب من هنا .	ما سمعت بهاذ المكان قبل هيك بالمنطقة هون .	ما اسمع بهاد العنوان من قبل قريب من هون.
سوف أحضر لك العرض الأسبوع القادم .	بدي اجهزلك العرض الاسبوع الجاي.	رح أجيبلك العرض الاسبوع الجاي.
صديقي مريض جداً . هل تستطيع أن تطلب دكتور ، من فضلك ؟	صاحبي كثير مريض. ممكن تطلب الدكتور، لو سمحت؟	صاحبي مريض كثير. بتقدر تطلب دكتور، لو سمحت؟
هل أخذت تذكرة الحافلة ؟	اخذت تذكرة الباص؟	خذت تذكرة الباص؟
يوجد لدى حوالي ألفي وخمسمائة دولار بالين الياباني .	أنا معي حوالي ألفين وخمسميت دولر بالين الياباني.	في عندي حوالي ألفي وخمسمية دولار بالين الياباني.
هل يمكنني استئجار مرشداً يتحدث اللغة اليابانية ؟	ممكن أستأجر دليل بسولف ياباني؟	بقدر أستأجر دليل بحكي ياباني؟
هذا بعينه ما كنت أبحث عنه .	هاي بالزبط اللي كنت بدور عليه.	هاظ بعينه اللي كنت بدور عليه.
رقم مقعدي دي اثنا عشر . أين هو ؟	رقم كرسيي دي اثنعش. وين هو؟	رقم مقعدي دي اثنعش. وين هو؟
فينس وليندا يريدان أن يبقيا بمفرديهما ، لذا أخشى أنني لا بد أن أبقى هنا هذه الليلة .	فينس وليندا بدهم يظلوا لحالهم، فبخاف انو لازم اظل هون الليلة.	فينس وليندا يريدان يوقفوا معه ، لذا بخاف اني لازم أظل هون الليلة.
إنها تبعد حوالي تسعة وتسعون ميلا .	هي بتبعد حوالي تسعة وتسعين ميل.	هي بتبعد تقريبا تسعة وتسعين ميل.
حسناً ، تم إعادة التأكيد على حجزك .	ماشي، اتأكدنا من حجزك مرة ثانية.	ماشي، رجعت التأكيد على حجزك.
حسناً ، فلنق نظرة عليك .	طيب ، خلينا نطل عليك .	ماشي، خلينا نشوفك.
هل يجب على أن أجيب بـ نعم أو بـ لا ؟	لازم اجاوب بـ اه أو بـ لأ ؟	لازم أجيب أيوه ولا لا؟
من فضلك ، بدلي شيك المسافرين إلي نقود .	لو سمحت اصرفلي هاد الشك السياحي كاش.	لو سمحت ، بدللي شيك المسافرين لـ نقود.
من فضلك دلني على أرخص وسيلة للذهاب إلى سان فرانسيسكو .	من فضلك دلني على أرخص طريقة حتى أروح على سان فرانسيسكو.	لو سمحت قلي أرخص طريقة لروح على سان فرانسيسكو.
أريد غرفة مفردة بحمام لقاء ثمانين دولارا ، من فضلك .	بدي غرفة فردية مع حمام بـثمانين دولار, لو سمحت.	بدي غرفة فردية بحمام لقاء ثمانين دولار، لو سمحت.
من فضلك ، هل رسمت لي خريطة بسيطة من هنا ؟	من فضلك، بتقدر ترسملي خريطة سهلة من هون؟	لو سمحت ، رسمتلي خريطة بسيطة من هون؟
ليس لدي أية مضارب أو أحذية .	ما عندي لا مظارب ولا أحذية.	ما عندي مضارب ولا أحذية.
أوه ، يبدو أنني افقد شيء ما كل وقت أسافر فيه .	أوه، شكلني بضيع اشي كل مرة بسافر فيها.	ايوه، شكلني انبسط اشي كل وقت بسافر فيه.
أجل ، إنها مفتوحة من التاسعة حتى التاسعة .	أها ، هي فاتحة من الساعة تسعة للساعة تسعة.	اه ، مفتوحة من التسعة لل تسعة.
سيأتي القطار السريع التالي بعد ساعة .	راح يجي القطار السريع الجاي بعد ساعة.	رح ييجي القطار السريع الجاي بعد ساعة.
مرحبا . كيف حالك ؟	مرحبا . كيف حالك؟	مرحبا. كيف حالك؟
تاريخ الانتهاء تسعة عشر من مارس تسعة وتسعين .	تاريخ انتهاء الصلاحية تسعطعش من شهر ثلاث التسعة وتسعين.	تاريخ الانتهاء تسعة عشر من شهر تسعة وتسعين.
هلا احتفظت بهذا لي ؟	ممكن تظبلي هاد؟	ممكن تخلي هاي ؟
هل تقبل بالين الياباني ؟	بتوخذ بالين ياباني؟	بتقبل بالين الياباني؟
من فضلك ، اكتب رقم الغرفة في الخلف .	من فضلك ، اكتب رقم الغرفة بقفى الورقة.	لو سمحت ، اكتب رقم الغرفة ورا.
هل يمكنك أن تصلح ذلك ؟	بتقدر تصلح هاي؟	بتقدر تصلح هيك؟
سيداتي سادتي ، لدينا على متن رحلتنا اليوم مضيفين يتحدثون اليابانية يمكن التعرف عليهم من خلال الشارة التي يلبسونه . إذا كنت تعرف أي شخص يريد مساعدة في الترجمة ، من فضلك دعنا نعرف .	سيداتي وسادتي،برحلتنا اليوم، عنا مضيفين بحكوا ياباني بتعرفوهم من الباجة اللي لابسينها. إذا بتعرف إنه أي حد بحتاج مساعدة بالترجمة، لو سمحت خلينا نعرف.	سيداتي ستاتي ، عنا على رحلتنا اليوم مضيفين بحكيوا ياباني بقدر نتعرف عليهم من خلال الشارة اللي بلبسونه. اذا كنت عارف أي واحد بدي مساعدة بالترجمة ، لو سمحت يلا نعرف.
هل يجب أن أدفع الرسم الإضافي عندما أدخل مبنى ؟	لازم أدفع رسوم ثانية بس أفوت عأي مبنى؟	لازم أدفع الرسم الإضافي لما أدخل مبنى؟
لقد انكسرت السنة .	انكسرت السنة.	انكسرت السنة.
تبدو البونساي كهواية شخص هرم .	شكلها البونساي هواية الختيار.	شكله البونساي كأنه واحد هرم.
لدينا غرفة مزدوجة بحمام بخمسة و ثمانين دولار .	عنا غرفة مزوجة مع حمام بخمسة وثمنين دولار.	عنا غرفة مزدوجة بحمام بخمسة و ثمانين دولار.
هل هذه من نوع ليفي خمسة صفر المعتمدة ؟	هاي من نوع ليفي خمسة صفر الأصلية؟	هاي من نوع ليفي خمسة صفر المعتمدة؟
هل يمكن أن أبيت عندكم الليلة ؟	بقدر أبات عندكو الليلة؟	بقدر أبيت عندكو الليلة؟
هل تود منضدة في المطعم الرئيسي أو في غرفة خاصة يا سيدي ؟	سيدي، بتحب طاولة بالمطعم الرئيسي ولا بغرفة خاصة؟	بدك طاولة بالمطعم الرئيسي أو بغرفة خاصة يا سيدي؟
مائة بالمائة قطن .	مية بالمية قطن .	مية بالمية قطن.
إنها لذيذة جداً .	كثير طيبة.	هي حلوة كثير.
هل أستطيع التحدث مع المدير ؟	بقدر أحكي مع المدير؟	بقدر احكي مع المدير؟
أنا آسف ، هو ليس بالداخل الآن .	أني آسف، هو مش جوا هسا.	أني آسف ، هو مش جوا هسا.
أريد غرفة بسريرين . ما ثمن الغرفة في الليلة ؟	بدي غرفة بتختين. قديش تكلفة الغرفة بالليل؟	بدي غرفة بسريرين. قديش سعر الغرفة بالليلة؟
ابقى على الخط وانتظر لحظة من فضلك .	خليك على الخط و استنى شوي من فضلك.	حط على الخط و استنى شوي لو سمحت.
هل يمكنني أن أرسل أي ميل واحد فقط قيمته دولار .	بقدر أبعث أي ميل واحد تكلفته بس دولر؟	بقدر ابعث ميل واحد بس قيمته دولار.
من أين تغادر الحافلات لمشاهدة المعالم ؟	من وين بتطلع الباصات حتى نشوف المناظر؟	من وين بطلع الباصات لمشاهدة المعالم؟
هل لديك ألوان أخرى من هذا ؟	عندك ألوان ثانية من هاذ؟	عندك ألوان ثانية من هاظ؟
اذهب إلى نادي رياضي كل يومين .	روح عالجيم كل يومين.	راح على نادي رياضي كل يومين.
تم الفصل بين مقاعدنا .	صار فصل بين كراسينا.	فصلنا بين كراسينا.
هل لك أن تخبرني عن مكان تحليق الطائرة الآن ؟	بتقدر تحكيلي وين بطير الطيارة هسا؟	ممكن تحكيلي عن مكان تحليق الطيارة هسا؟
كيف ترغب في إجراء المكالمة ؟	شلون بدك تعمل المكالمة؟	شلون بدك تجيب المكالمة؟
أفهم ذلك . أحاول استئجار سيارة سيتروين .	بفهم هالاشي. بحاول أستأجر سيارة سيتروين.	بفهم هيك. بحاول أستأجر سيتروين.
هذه هي الغرفة اثنا عشر صفر سبعة .	هاي هي الغرفة اثنعش صفر سبعة.	هاي الغرفة اثنعش صفر سبعة.
هل لك أن تأخذ هذا ، من فضلك ؟	ممكن توخذ هاذ، لو سمحت؟	ممكن توخذ هاظ، لو سمحت؟
كم عمر هذا الصبي ؟	قديش عمر هالولد؟	قديش عمر هاد الصبي؟
قارب مع مرشد ، من فضلك .	قارب مع مرشد ، لو سمحت.	قارب مع مرشد، لو سمحت.
القهوة غير محسوبة .	القهوة مش محسوبة؟	القهوة مش محسوبة.
لقد أضعت تذكرة الطيران الخاصة بي .	انا ضايع تذكرة الطيران حقتي.	أضعت تذكرة الطيران الخاصة بي.
نعم , في بادئ الأمر ، اغسليها على منفصلة .	أيوة, بالأول, غسليها لحالها.	اه, بالبداية ، اغسليها على منفصلة.
هل يمكنني أن التقط بعض الصور ؟	ممكن اوخذ شوية صور؟	بقدر اصور شوية صور؟
هلا فتحت هذه الحقيبة ، من فضلك ؟ ماذا يوجد هنا .	بتقدر تفتح هاي الشنطة، لو سمحت؟ شو لقيت فيها هون؟	ممكن تفتح هاي الشنتة ، لو سمحت ؟ شو في هون.
ما نوع هذه الموسيقى ؟	شو نوع هاي الموسيقى؟	شو نوع هاي الموسيقى؟
أريد بعض الكريم للأيدي .	بدي شوية كريم للإيد.	بدي شوية كريم للأيدي.
مائة غير المدخنين من فضلك .	مية غير اللي بدخنوا، لو سمحت.	مية المدخنين لو سمحت.
من فضلك أعطني بعض الفكة .	لو سمحت اعطيني شوية فراطة.	لو سمحت اعطيني شوية فكة.
بالتأكيد . لدينا بعض الماركات الأمريكية الأصلية الجميلة . للكتب .	أكيد. عنا شوية ماركات أمريكية أصلية حلوة. للكتب.	أكيد. عنا شوية ماركات أمريكية الأصلية كثير. للكتب.
لدي وصولها ، سوف ندفع ثمن شحنها إلى عنوان منزلك .	لما توصل. راح ندفع حق الشحن لعنوان بيتك.	عندي وصولها، رح ندفع ثمن شحنها على عنوان منزلك.
إنها مشغولة .	هيه مشغولة.	هي مشغولة.
سرقت حقيبتي في الشارع .	انسرقت شنتي بالشارع.	سرقت شنتتي بالشارع.
لم تصنع هذه باليابان ، أليس كذلك ؟	ما صنعت هاي باليابان، صح؟	ما صناعت هاي باليابان، صح؟
سيبدأ الصعود على متن الطائرة الساعة الرابعة والنصف لذلك من فضلكم كونوا هناك قبل هذا الموعد .	رح يبلش الصعود على الطيارة الساعة أربعة ونص . لذالك لو سمحتو كونو هون قبل هذا الوقت.	راح يطلع عالطيارة الساعة اربعة ونص لذلك لو سمحت كونوا هناك قبل هاظ الموعد.
نحن هنا لمدة يوم .	إحنا هون لمدة يوم.	احنا هون يوم.
لقد فقدت شيكاتي السياحية .	ضيعت الشيكات السياحية تبعتي.	ضيعت شيكاتي السياحية.
ما أنواع الخضراوات الموجودة لديك ؟	شو هي الخضرة اللي عندك؟	شو أنواع الخضراوات اللي عندك؟
يجب أن أنتقل إلى عربة مكيفة واحد صفر صفر . هل هذا ممكن ؟	بدي انتقل لعرباية مكيفة واحد صفر صفر. ممكن؟	لازم أروح على عرباية مكيفة واحد صفر صفر. ممكن ؟
نعم ، حجز لمدة ستة أيام من فضلك ، بدء من الثالث والعشرين من يوليو .	ايوه، حجز لست أيام لو سمحت، ببلش من ثلاث وعشرين ستة.	اه ، حجز ست أيام لو سمحت ، بدأ من ثلاث وعشرين من شهر ثلاث وعشرين.
من أي مكان يمكنني أن أغير القطار الذي يوصلني إلى إدنبره ؟	منين بقدر أغير القطار اللي بوصلني لادنبرة؟	من أي مكان بقدر أغير القطار اللي يوصلني على إدنبره؟
أكثر منتجاتنا بيعت عبر السنوات الأربع الماضية هي الآلة الناسخة طراز أ . أكس أربعة خمسة صفر .	أغلب اللي بعناه من منتجاتنا على مرّ الأربع سنين اللي فاتت هي الآلة الناسخة، طراز أ . أكس أربعة خمسة صفر.	أكثر منتجاتنا بيعت عبر السنوات الأربع الماضية هي الآلة الناسخة طراز أ. أكس أربعة خمسة صفر.
آسف سأعود لاحقاً .	آسف. راح أرجع بعدين.	آسف رح أرجع بعدين.
هل يتحتم عليك كثيراً أن تعمل حتى ساعة متأخرة ؟	بتظطر كثير تشتغل لوقت متأخر؟	بتقدر كثير تعمل لحد ما ساعة تأخرة؟
هل لديك نفس هذا التصميم بكعب أعلى ؟	عندك نفس هاذ الديزاين بس كعب أعلى؟	عندك نفس التصميم بكعب فوق؟
التكلفة ، من فضلك . هل تقبلون بطاقة فيزا ؟	الحساب ، لو سمحت. يتقبلو بطاقة فيزا؟	التكلفة ، لو سمحت. بتتقبلوا بطاقة فيزا ؟
من فضلك استلق هنا .	لو سمحت، اتمدد هون.	لو سمحت استلق هون.
اسمي ميتشكو تاناكا ، ورقم الرحلة إلى طوكيو هو خمسة ، صفر ، واحد .	اسمي ميتشكو تاناكا، ورقم الرحلة لطوكيو هو خمسة، صفر، واحد.	اسمي ميتشكو تاناكا، ورقم الرحلة لطوكيو هو خمسة،صفر، واحد.
آه ، كلا . من فضلك أسرع . إننا متأخرون .	آه، لأ. لو سمحت عجل، إحنا متأخرين.	آه ، لا. لو سمحت اسرع. عنا متأخرين.
ما هي أفضل جولة حتى أرى أشهر الأماكن ؟	شو هي أحسن رحلة عشان أشوف أشهر الأماكن؟	شو أحسن جولة عشان اشوف أشهر الأماكن؟
حسنا . مقعدان من فضلك .	ماشي. كرسيين لو سمحت.	طيب. مقعدين لو سمحت.
أظن أنه بديع المنظر .	بظن انه منظره صاير حلو.	بتوقع أنه بديع المنظر.
بنطلون أخر ؟	بنطلون ثاني؟	بنطلون ثانية؟
سأجرب بعضاً من الشراب المثلج .	بدي أجرب شوي من العصير المثلج.	رح أعمل شوية شاي ثلج.
هل هذا هو الطريق الصحيح إلى المحطة المركزية ؟	هاد الطريق الصح للمحطة الرئيسية؟	هاظ هو الطريق الصح للمحطة المركزية؟
أريد شراء تذكارات لأصدقائي . أيمكن أن تُوصي ببعض منها ؟	بدي أشتري هدايا تذكارية لأصحابي. ممكن تنصحني بإشي؟	بدي اشتري تذكارات لأصحابي. بتقدر توصيني ببعض منها؟
أريد الحصول على تأمين .	بدي تأمين.	بدي تأمين.
آوه إلقاء نظرة على صندوقك .	واو أنا حاب أشوف صندوقك.	بدي اشوف صندوقك.
إنها أربعة عشرة .	هاي أربعطعش.	هي أربعطعش.
سأنتظر حتى يتاح الجلوس في التراس .	رح أستنا لحتى يصير الجلوس بالتراس ممكن.	رح أستنى حتى يتاح الجلوس بالتراس.
يمكنك أن تمكث في منزلي .	ممكن تفضل تقعد ببيتي.	بتقدر تظل ببيتي.
هذا , من فضلك .	هاظ ، لو سمحت.	هاظ, لو سمحت.
من فضلك نظف هذا المعطف .	لو سمحت نظف هاظا الكبوت.	لو سمحت نظف هاظا الجاكيت.
شراب الشمام كحلاء ، من فضلك .	عصير الشمام كحلو ، لو سمحت.	شراب الشمام كحلاء ، لو سمحت.
أخطط لتعلم الجولف .	بفكر أتعلم جولف.	بخطط تعلم الجولف.
كان هذا مكسوراً بالفعل عندما فتحت الطرد .	كان هاذ مكسور فعلاً لما فتحت الطرد.	كان هاظ مكسورا لما فتح الطرد.
توقفت ساعتي .	ساعتي وقفت.	وقفت ساعتي.
أجل . إنها مشكلة تخلص من الفضلات .	أيوة. هاي مشكلة كب الزبالة.	اه. هاي مشكلة تخلص من الفضلات.
هناك محل لبيع الزهور في الطريق .	في محل ورد بالطريق .	في محل بيع الزهور بالطريق.
هل السيدات يقبلن هذا ؟	الستات بقبلن بهاذ؟	السيدات بقبلوا هاظ؟
هل يمكننا ترك أشياءنا ما عدا الأشياء القيمة في الحافلة ؟	بنقدر نخلي اغراضنا هون، ماعيدا الأشياء الغالية، في الباص؟	ممكن نترك أشياءنا عدا الأشياء القيمة بالباص؟
بمقدورك أن ترى واحداً عند " كارينجي هول " .	بامكانك تشوف واحد بقاعة كارنيجي.	بتقدر تشوف واحد عند "كارينجي هول".
آسف جدا ، لكني أود تأجيل الميعاد .	آسف كثير، بس بدي أجل الموعد .	آسف كثير، بس بدي أتأجيل الميعاد.
أجل , يمكننا القيام بخدمتك بداية من السابعة .	اها، منقدر نخدمك من الساعة السابعة.	أه, بنقدر نعمل خدمتك من الساعة سبعة.
على أي جانب من ميدان الاتحاد هي ؟	على اي جهة من دوار الاتحاد بتكون؟	على أي طرف من ميدان الاتحاد هي؟
أريد بعضاً من كريم التنظيف .	بدي شوية كريم تنظيف.	بدي شوية كريم التنظيف.
من فضلك لفها كل على حدة .	من فضلك غلفها كل وحدة لحالها .	لو سمحت لفها كل على حدة.
كود المنطقة هو ثلاثة . ورقم الهاتف هو اثنان ثلاثة أربعة ثلاثة أربعة صفر صفر .	رقم المنطقة ثلاثة. ورقم التلفون اثنين ثلاثة أربعة ثلاثة اربعة صفر صفر.	كويس المنطقة هو ثلاثة. ورقم التلفون هو اثنين ثلاثة أربعة ثلاثة أربعة صفر صفر.
كم عدد المرات التي سأغير فيها القطارات للوصول إلى هناك ؟	كم قطار رح اركب عشان أوصل هناك؟	قديش رح أغير فيها القطارات عشان اوصل لهناك؟
هل تريد تسوية الفاتورة الآن ؟	راح تحاسب عالفاتورة هسا؟	بدك تسوية الفاتورة هسا؟
هل هذه السيارة الأجرة متاحة ؟	هاي التكسي فاضية؟	هاي السيارة الأجرة متوفرة؟
هل يمكن أن تدلني على بعض الفنادق الرخيصة والنظيفة ؟	بصير ادلني عبعض الفنادق الرخيصة والنظيفة؟	ممكن تدلني على فنادق رخيصة و نظيفة؟
أنا مع بعض الأصدقاء .	أنا مع شوية صحاب.	أنا مع بعض الأصحاب.
لشخصين عند الساعة السابعة , الاسم وتاناب .	لشخصين الساعة سبعة. الاسم وتاناب.	لشخصين الساعة سبعة, الاسم وتاناب.
ما هو الإجمالي ؟	شو الإجمالي؟	شو الإجمالي؟
أين يمكنني أن أشتري زلاجات وأحذية ؟	من وين بقدر اشتري زلاجات و أحذية؟	وين بقدر اشتري زلاجات وأحذية؟
ما وجه الاختلاف بين منتجك ومنتج منافسيك ؟	شو الفرق بين منتجك ومنتج الناس اللي بتنافسك؟	شو وجه الاختلاف بين منتجك ومنتج منافسيك؟
أين تعلم السيد جونز اللغة اليابانية ؟	وين السيد جونز تعلّم اللغة اليابانية؟	وين بتعلم السيد جونز اليابانية؟
لا يمكنني وضع الأمتعة تحت المقعد . هل لك أن تحتفظ بها لأجلي من فضلك ؟	أنا ما بقدر أحط شنطي تحت المقعد. ممكن تخبيلي ياهم لو سمحت؟	ما بقدر أحط اغراضي تحت الكرسي. بتقدر تخليها لأجلي لو سمحت؟
هل يمكنك أن تستدعي موظفاً يتحدث اليابانية ؟	ممكن تنادي موظف بحكي بالياباني؟	بتقدر تنادي موظف بحكي ياباني؟
سوف أبلغ الشرطة بذلك .	راح أبلغ الشرطة بهاظ الإشي.	رح أبلغ الشرطة بهاد.
عيد ميلادك اقترب .	عيد ميلادك قرب.	عيد ميلادك اقترب.
تعثر صديقي والتوي كاحله .	صاحبي وقع والتوى كاحله.	صاحبي والتوي كاحله.
نعم , أعتقد ذلك .	اه، بتوقع هيك.	اه, بتوقع هيك.
اتجاه واحد .	اتجاه واحد.	اتجاه واحد.
هلاّ جعلت توقيعك هنا والحروف الأولى من اسمك هنا .	هات خلي توقيعك هون وأول حروف اسمك هون.	ممكن تكتب توقيعك هون وحروف اولى من اسمك هون.
أين يمكن أن أوقف سيارتي ؟	وين ممكن أقف سيارتي؟	وين بقدر أوقف سيارتي؟
سأغلق الآن . شكراً على انتباهكم .	رح أسكر هسا. شكراً على انتباهكو.	رح أسكر هسا. شكراً على انتباهكم.
اللعنة . اللعنة . اللعنة . اللعنة . لقد كبرت معتاداً على وجهها .	يلعن. يلعن. يلعن. يلعن. أنا تعودت كثيرعلى وجهها.	اللعنة. اللعنة. اللعنة. اللعنة. كبرت كثير على وجهها.
سنراك في الغد .	رح نشوفك بكرة.	رح نشوفك بكرا.
عندي ثلاثة أطفال .	عندي ثلاث ولاد.	عندي ثلاث أطفال.
نعم ، هي ، لأنك تستطيع أن ترى العلم أمام مكتب البريد .	صح، هي . لأنه بتقدر تشوف العلم قدام مكتب البريد.	اه ، هي ، لأنك بتقدر تشوف العلم قدام مكتب البريد.
هل تستطيع إنزال أمتعي إلى الردهة غداً صباحاً ؟	ممكن تنزل أغراضي على الردهة بكرة الصبح؟	بتقدر تنزل اغراضي على الرده بكرة الصبح؟
أربع ليالي .	أربع ليالي.	أربع ليالي.
دقيقة فقط ، من فضلك .	ديقة بس، لو سمحت.	دقيقه بس ، لو سمحت.
هل ستواجهني أية صعوبات في الجمارك ؟	راح ألاقي أي صعوبة بالتعامل مع الجمارك؟	رح تواجهني صعوبات بالجمارك؟
هلا أخبرتني كيفية تعديلها من فضلك ؟	ممكن تحكيلي كيف اعدلها لو سمحت؟	ممكن تحكيلي كيف أتعديلها لو سمحت؟
حسنا ، لا أعلم بعد لكنني سوف أحاول بالتأكيد .	ماشي، مش عارف لحد الآن بس رح أحاول أكيد.	ماشي، مش عارف بس رح أحاول.
موعده المقرر هو الثامنة والنصف مساءْ بالتوقيت المحلي .	موعده هو الساعة ثمنية ونص المسا بالتوقيت المحلي.	موعده المقرر هو ثمنية ونص المسا بالتوقيت المحلي.
هل يمكن أن تضع حقيبة السفر هذه في صندوق السيارة .	ممكن لو سمحت تحطلي شنة السفر هاي بالطبون ؟	ممكن تحط شنتة السفر هاي بصندوق السيارة.
هذه ليست تفاحة ولكنها خوخة .	هاي مش تفاحة هاي خوخة.	هاي مش تفاحة بس خخة.
إذا كان بالإمكان ، لم أكن لأخلع السنّة .	اذا ممكن، أنا بفضل ما تقلع السن.	اذا كان ممكن ، ما كنت بدي خلع السنه.
علي أن أفحص ذلك مع زوجتي .	لازم أشوف الموضوع مع مرتي.	لازم أفحص هاد مع زوجتي.
لا أعتقد أن هذه السكينة نظيفة . أيمكنك أن تُحضر لي واحدة أخرى ؟	أنا ما بظن إنه هاي السكينة نظيفة. بتقدر تجبلي وحدة تانية؟	ما بظن انه هاي السكينة نظيفة. بتقدر تجيبلي وحدة ثانية؟
املأ البنود الآتية في بطاقة التسجيل .	املي البنود اللي جاية على كرت التسجيل.	عبي البنود اللي بتكون ببطاقة التسجيل.
ما الذي يمكن أن أراه في هذه الجولة ؟	شو بقدر أشوف بهاي الرحلة؟	شو بقدر اشوف بهاي الجولة؟
هل هذا المتبل حار ؟	هاظ المتبل حار؟	هاظ المتبل حار؟
هذه كلها مطبوعات .	هاي كلها مطبوعات.	هاي كلها مطبوعات.
هذه هديه لصديق .	هاي هدية لرفيقي.	هاي هديه لصاحب.
أراهن بخمسة دولارات .	براهن بخمس دولارات .	براهن بخمس دولارات.
هل توجد أية جولة صباحية ؟	في أي جولات صباحية؟	في جولة صباحية؟
سنمكث .	راح نظل.	رح نضل.
هل توجد غرفة استراحة عامة بالقرب من هنا ؟	في غرفة استراحة عامة جنبنا هون؟	في غرفة استراحة عامة قريبة من هون؟
آسف ، لقد تحققت من إدارة الخدمة وإدارة المفقودات ولم أجدها عندهم .	بعتذر، تأكدت من إدارة الخدمة وإدارة المقودات وما لقيتها عندهم.	آسف ، وقعت من إدارة الخدمة وإدارة المفقودات و ما أجدها عندهم.
هل قلت لي كيف أذهب إلى المتحف ؟	قلتلي كيف بروح على المتحف؟	قلي كيف بقدر أروح عالمتحف؟
لا أريد إنفاق أكثر من عشرين دولاراً .	ما بدي أصرف أكثر من عشرين دولار.	ما بدي أصرف أكثر من عشرين دولار.
هذا المكان مكتظ بالناسب ، أليس كذلك ؟	هاظ المكان معبى ناس، مش هيك؟	هاظ المكان مكتظ بالناسب ، صح ؟
سأحضر المدرسة الصيفية بجامعة هاواي .	رح أداوم بالمدرسة الصيفية بجامعة هاواي.	رح أجيب المدرسة الصيفية بجامعة هاواي.
من فضلك اعطني تصريحاً سارياً لمدة أسبوع .	لو سمحت أعطيني اذن لمدة أسبوع.	لو سمحت اعطيني تصريح ساري لمدة أسبوع.
ما هذا من فضلك ؟	شو هاظ لو سمحت؟	شو هاظ لو سمحت؟
سأحتاج إلى بطاقة ائتمان .	راح أحتاج الفيزا .	بدي بطاقة ائتمان.
إذن دعنا نبطنها من الداخل .	معناته خلينا نحشيها من جوا.	طيب خلينا نبطها من جوا.
هل هذه محطة قطار سريع ؟	هاي محطة اكسبريس؟	هاي محطة قطار سريع؟
من ثمانية إلى اثنى عشر من فضلك .	من ثمانية ل اثنعش لو سمحت.	من ثمانية لثلث اذا سمحت.
أود قياس بذلة السباق الخاصة بي .	بدي اقيس بدلة السباق تبعتي.	بدي أكتب بذلة السباق الخاصة بي.
لقد طلبته منذ وقت طويل .	طلبته من زمان.	طلبته من وقت طويل.
أين الحمام ؟	وين الحمام؟	وين الحمام؟
اليابانيون لا يأخذون إجازات طويلة .	اليبانيين ما بيوخذو عطل طويلة.	اليابانيين ما بخذوا إجازات طويلة.
هاهي .	هيها .	هاي.
أنها مناسبة تماما .	زابطة تماما.	هي مناسبة كثير.
مرحبا . هذه هي الخطوط الجوية المتحدة .	مرحبا . هاي هي الخطوط الجوية المتحدة .	مرحبا. هاي هي الخطوط الجوية المتحدة.
أعيش في شقة إيجارها ثمانون ألف ين في الشهر .	بعيش بشقة، الإجارتها ثمانين ألف ين بالشهر.	بسكن بشققة إيجارها ثمانين الف ين بالشهر.
هل هناك أماكن شاغرة بالنسبة لرحلة الخميس ؟	في أماكن فاظية برحلة يوم الخميس؟	في أماكن شاغرة لرحلة الخميس؟
أعرف نادي قديم لموسيقى الجاز بوسط البلد .	بعرف نادي قديم لموسيقى الجاز بوسط البلد.	بعرف نادي قديم لموسيقى الجاز بوسط البلد.
هل انعطف يساراً ؟	بدي ألف يمين؟	وقع يمين؟
أحبه فعلاً .	بحبه فعلا.	أنا بحب.
من فضلك احفظ هذه الحقائب في محتجز الجمارك .	لو سمحت خلي هالشنتات بالجمارك.	لو سمحت حفظ هاي الشناتي بمحل الجمارك.
هل يمكنني استخدام إِشارة ضوئية ؟	ممكن استعمل إشارة ضوئية؟	بقدر أستخدم إشارة ضوئية؟
أعمل في شركة نشر .	بشتغل بشركة نشر.	بعمل بشركة نشر.
اتجه يساراً في هذا الشارع ثم انعطف عند أول منعطف يمين .	روح يمين بهالشارع وبعدين اتوجه يمين عند اول منعطف.	طلع شمال بهاظ الشارع بعدين وقف عند أول منعطف يمين.
بالفعل لدي أخبار . أنا سأتزوج .	فعلياً، عندي أخبار. أنا بدي أجوز.	فعلا عندي أخبار. أنا رح أتزوج.
واحد هامبرجر وواحد شيز برجر ، من فضلك .	واحد همبرقر وواحد شيز برقر، لو سمحت.	واحد هامبرجر وواحد شيز برجر، لو سمحت.
أوه ، آسف . كانت هناك مشاكل ونحن نقوم بحلها ، هل تتفضل بالانتظار لمدة ثلاثين دقيقة ؟	أووه، أنا آسف. كان في مشاكل منحلها. ممكن تستنى لثلاثين دقيقة؟	ايوه، آسف. كانت في مشاكل و عنا نعملها، بتحب تستنى ثلاثين دقيقة؟
كم عددها ؟	كم عددها ؟	قديش عددها؟
و هو كذلك . سأوصلك إلى هناك .	و هو هيك . رح اوصلك لهناك.	و هيك. رح أوصلك لهناك.
أريد فندق أرخص قليلاً .	بدي فندق أرخص شوي.	بدي فندق أرخص شوي.
الأجدر بك أن تكف عن ذلك .	أحسنلك تبطل هالاشي.	لازم تخلي هيك عن هيك.
هل أي من المتاجر الكبيرة به يعمل الآن ؟	في أي مول فاتحة هسه؟	أي محل كبير بتشتغل هسا؟
كم تستغرق حتى تصبح متاحة .	قديش بدها حتى تصير فاظية .	قديش بدك وقت حتى تصبح متوفرة.
معذرة . أريد أن أطلب طلب .	معلش . بدي أطلب طلب .	معلش. بدي أطلب طلب.
عندنا حفلة مساء الجمعة . لماذا لا تنضم لنا ؟	عنا حفلة يوم الجمعة بالليل. ليش ما تيجي معنا؟	عندنا حفلة بكرا الجمعة. ليش ما تشارك لنا؟
كيف أستقلها ؟	كيف اركبهاا؟	شلون أطلعها؟
هل هي جولة يوم كامل ؟	هي الرحلة ليوم كامل؟	هي جولة يوم كامل؟
في أي وقت يمكنني مغادرة الفندق ؟	بأي ساعة ممكن أعمل خروج من الفندق؟	بأي وقت بقدر اروح على الفندق؟
أحضر لي بعض من الجبن المبشور .	هاتلي شوي من الجبنة المبروشة.	جيبلي شوية لبن مبشور.
هل لديك أحذية حريمي عند أصابع القدم ؟	عندك كنادر ستاتي مفتوحة من عند الأصابع؟	عندك أحذية حريمي عند أصابع القدم؟
هذه كبيرة جداً .	هاي كثير كبيرة.	هاي كبيرة كثير.
نبيذ غير حلو ، من فضلك .	واين بدون سكر، لو سمحت.	نبيذ مش حلو ، لو سمحت.
تبلغ الميزانية أقل من ألف دولار .	الميزانية أقل من ألف دولار.	ببلغ الميزانية أقل من الف دولار.
إنها معطلة . هل تستطع فحص آلة التصوير هذه ؟	هاي معطلة. بتقدر تشيّك على آلة التصوير هاي؟	هي معطلة. بتقدر تفحص آلة التصوير هاي؟
لقد كان هناك حادث مرور .	كان في حادث سير.	كان في حادث مرور.
إجمالي سكان اليابان حوالي مائة وثلاثين مليوناً .	العدد الكلي لسكان اليابان حوالي مية وثلاثين مليون.	إجمالي سكان اليابان تقريبا مية وثلاثين مليون.
أي نوع من الملابس ؟	أي نوع من الأواعي ؟	شو نوع الملابس؟
في أي مجال كان من قبل ؟	بأي مجال هو كان قبل؟	شو كان قبل ؟
كم تتكلف الليموزين للذهاب إلى وسط المدينة ؟	قديش تكلف الليموزين عشان نروح عوسط البلد؟	قديش بتكلف الليموزين عشان اروح على وسط البلد؟
الاسم هو جورو موتوياما . والرقم هو صفر ثلاثة ثلاثة اثنان ستة واحد اثنان أربعة تسعة خمسة .	الاسم هو جورو موتوياما . والرقم هو صفر ثلاثة ثلاثة اثنان ستة واحد اثنان أربعة تسعة خمسة .	الاسم جورو موتوياما. والرقم هو صفر ثلاثة ثلاثة اثنين ستة واحد اثنين أربعة تسعة خمسة.
لا ، ولكن شكراً لك . إنني أشعر بتحسن .	لا، بس شكرًا هونيك. أنا حاسس انو صرت أحسن.	لا، بس شكرا الك. أنا بشعر بتحسن.
هل لك أن نبدل مقاعدنا من فضلك ؟	ممكن نبدل كراسينا لو سمحت؟	ممكن نبدل كراسينا لو سمحت؟
هل هناك مكان يتم فيه عزف الموسيقي الريفية ؟	ما في أي مكان بعزف ألحان ريفية؟	في مكان بصير فيه عزف موسيقى الريفية؟
هلا أخبرتني قبل أن نصل إلى درهام ؟	بصير تخبرني قبل ما نوصل لـ درهام؟	ممكن تحكيلي قبل ما نوصل على دروس؟
ظل سائراً عبر هذا الممر , وستجدها على الجانب الأيمن .	ظل ماشي بالممر هاذ , و رح تلاقيها عالجهة اليمين.	ظل مشي عبر هالممر, و رح تجدها على اليمين.
أشعر بصداع .	بحس بصداع.	حاس بصداع.
عامل الصيانة سيصعد في الحال .	عامل الصيانة راح يطلع مباشرة.	عامل الصيانة رح يطلع بسرعة.
هل تمانع في جلوسي هنا ؟	بتمانع لو اقعد هون؟	بتمنع بجلوس هون؟
لقد قمت بزيارة البحيرات الكبرى لأول مرة .	هاي أول مرة بزور البحيرات الكبرى.	طلعت على البحيرات الكبرى أول مرة.
أصبت بالتهاب في الحلق .	التهب حلقي .	وقعت بالتهاب بالحلق.
نسافر جواً ثلاث مرات في الأسبوع ، أيام الثلاثاء والجمعة والسبت .	بنسافر بالطيارة ثلث مرات بالأسبوع، الثلاثاء، الجمعة والسبت.	نسافر جولة ثلاث مرات بالأسبوع، أيام الثلاثاء والجمعة والسبت.
نعم . أيقظني من النوم بعد ثلاثة ساعات , من فضلك .	أيوة . صحيني من النوم بعد ثلاث ساعات, لو سمحت.	اه. قاعد نروح بعد ثلاث ساعات, لو سمحت.
إلى أين يجب علي أن أنقل ؟	لوين لازم أحول؟	وين لازم أنقل؟
لا أعرف كثيراً عن النبيذ ؟ ماذا يناسب هذا الطبق ؟	أنا ما بعرف كثير بالواين. شو بنفع مع هاذ الأكل؟	ما بعرف كثير عن النبيذ؟ شو بناسب هاظ الاكل؟
وللشرب ؟ .	بتشرب إشي ؟ .	للشرب ؟
نعم ، هذا لا يشمل الوجبات .	أيوة، هاذ ما بشمل الأكل.	اه ، هاظ مش شامل الوجبات.
قمة جبل " فوجي " هي اعلي قمة جبلية في اليابان حيث يبلغ ارتفاعها ثلاثة آلاف وسبعمائة وستون مترا .	جبل فوجي هو أعلى قمة باليابان على ارتفاع ثلاثة ألاف وسبعمية وستين متر.	قمة جبل "فوجي" هي اعلي قمة جبلية باليابان حيث ارتفاعها ثلاث الاف وسبعين و ستون متر.
هل يمكن أن ترسل أحدا ؟	ممكن تبعت حدا؟	ممكن تبعث حدا؟
هل من الممكن أن تفصل أكثر ؟	يتقدر توضح أكثر ؟	ممكن تفصل أكثر؟
أريد واحدة حديثة .	بدي وحدة جديدة.	بدي وحدة حديثة.
حسنا ، ولكن ليس منطقة المقاعد المكشوفة . فاليوم شديد الحرارة .	طيب ، بس مش على مكان الكراسي المكشوفة. اليوم كثير شوب.	ماشي، بس مش منطقة المقاعد المكشوفة. اليوم حرارة كثير.
سأرسلها لك ، لذا من فضلك انتظر هنا .	راح أبعثها الك، عشان هيك استنى هون لو سمحت.	رح ابعثهالك، لذا لو سمحت استنى هون.
أخشى أن يكون هناك خطأ في الفاتورة .	خايف يكون في غلط بالفاتورة.	خايف يكون في غلط بالفاتورة.
هذا بارد إلى حد ما . هل يمكن أن تقوم بتسخينه ؟	هاظا بارد شوي. ممكن تسخنه؟	هاظ بارد شوي. بتقدر تسخينه؟
هلا راقبت حقيبتي من فضلك ؟	ممكن تراقبلي شنتي ، لو سمحت؟	ممكن تراقب شنتتي لو سمحت؟
لا امتلك أي نقود .	ما معي مصاري.	ما اتملك أي مصاري.
أريد عامل تشغيل يتحدث اليابانية من فضلك .	بدي شغيل بيحكي ياباني لو سمحت.	بدي عامل تشغيل بحكي ياباني لو سمحت.
يبدو أنها نادرة جداً .	شكلها نادرة كثير.	شكلها كثير نادرة.
إنني على يقين أن المجرم قريب .	أنا متأكد إنه المجرم قريب.	أنا متأكد إنه المجرم قريب.
أجل ، أظن أني سوف أنظر .	ايوا، بظن إني رح اطلع.	اه ، ظن اني رح أشوف.
هل يوجد أحد يستطيع العزف على البيانو ؟	في أي حدا بعرف يعزف عالبيانو؟	في حدا بقدر يلعب البيانو؟
لستُ معتمداً قانونياً .	أنا مش مؤهل.	مش معتمد.
هل يمكنك أن توصل أمتعتي إلى الغرفة ؟	ممكن توصل اغراضي للغرفة؟	بتقدر توصل اغراضي للغرفة؟
هل الشوارع الخلفية خطر ؟	الشوارع الخلفية خطرة ؟	الشوارع الخلفية خطر؟
هل لك أن توقظني في تمام السادسة من فضلك ؟	بتقدر تصحيني الساعة ستة، لو سمحت؟	ممكن توقظني بتمام الستة لو سمحت؟
أشعر بحالة سيئة وغثيان .	حاس بلعية ووظعي زفت.	حاس حالي سيء و غثيان.
لقد اتصلت منذ ثلاثة أيام بخصوص حقيبة ضائعة .	اتصلت من ثلاث أيام عشان شنتة ظايعة.	اتصلت من ثلاث ايام بخصوص شنتة ضائعة.
بضع دقائق أخرى من فضلك .	كم دقيقة كمان اذا سمحت.	بشوي ثانية لو سمحت.
لم أدرك الرحلة رقم عشرون المتجهة إلى سان فرانسيسكو .	ما لحقت الرحلة رقم عشرين اللي رايحة عسان فرانسيسكو.	ما بعرف الرحلة رقم عشرين اللي رايح على سان فرانسيسكو.
آه ، عندك ؟ بالتأكيد إن لديك تشكيلة كبيرة .	أها، عندك؟ طبعا إنت عندك تشكيلة كبيرة.	آه ، عندك ؟ أكيد عندك تشكيلة كبيرة.
بطريقة أبطأ ، من فضلك .	بشكل أبطأ ، لو سمحت.	بطريقة خفيفة ، لو سمحت.
إنه لا يلائمني .	مش مناسبني.	ما بناسبني.
هل من الممكن إجراء اتصال على أن يتم تحصيل أجرته من الطرف الآخر ؟	ممكن أعمل مكالمة وتوخذوا حقها من الطرف الثاني؟	ممكن ناتصال عشان يصل أجره من الطرف الثاني؟
عندك أية شيء يمكن أن أتعاطه للطفح الجلدي ؟	عندك أي اشي ممكن آخذه عشان هاذ الطفح الجلدي؟	عندك أي اشي بقدر تعطيني عشان اتخد الجلدي؟
هل تفضلت و احتسيت القهوة معي ؟	تتفضل و تشرب قهوة معي؟	بتحبت و انبسطت قهوة معي؟
سأقوم بتسجيل الدخول في تمام الساعة الثامنة مساءاً تقريباً .	راح أنزل بالفندق حوالي الساعة ثمنية المسا .	رح أعمل تسجيل الدخول الساعة ثمنية المسا تقريبا.
إننا على ارتفاع اثني عشر ألف قدم .	احنا على ارتفاع اتناشر ألف قدم.	عنا ارتفاع اثنعش ألف قدم.
لقد تمتعت بإقامتي . شكراً لك .	انبسطت بإقامتي . شكراً الك.	انبسطت بسكني. شكراً الك.
أُفضلُ حجرة هادئة .	بفظل غرفة هادية.	بحب غرفة هادية.
كان يجب تدبير وسيلة مواصلات . ذاهبة إلى بوسطن .	لازم ندبر طريقة أو سيارة رايحة على بوسطن.	كان لازم تدبير وسيلة مواصلات. ذاهبة بوسطن.
لقد سرق مسجل الفيديو من غرفتي .	سرقو مسجل الفيديو من غرفتي.	طلع مسجل الفيديو من غرفتي.
هذا هو طبقنا المميز , سمك موسى المشوي الخاص بدوفر .	هاذ طبقنا الخاص, سمك موسى المشوي الخاص بدوفر.	هاظ هو طبقنا المميز, سمك موسى المشوي الخاص بدوفر.
هل يمكن أن أختر جريدة يابانية , من فضلك ؟	ممكن اختار جريدة يابانية، لو سمحت؟	ممكن اختر جريدة يابانية, لو سمحت ؟
هل لي أن أقاطعكم ؟	ممكن أقاطعكم؟	ممكن أقاطعكم؟
هل يوجد بالقرب من هنا مطعم صيني ؟	في مطعم صيني قريب من هون؟	في قريب من هون مطعم صيني؟
لا أريد أي شيء يكون كبير الحجم .	ما بدي أي اشي ظخم.	ما بدي إشي كبير الحجم.
هل أنت الأخير في هذا الصف ؟	إنت الأخير بهاذ الصف؟	انت الأخير بهاد الصف؟
إن محفظتي نشلت في القطار .	وحدة سرق محفظتي في القطر.	محفظتي نشلت بالقطار.
