# Supplementary material for: Exploring prompting for dialectical machine translation: a focus on north Jordanian Arabic
Source: PeerJ journal article supplement (doi:10.7717/peerj-cs.3209), 2025-11-12
Supplement: Code.zip [file Irbid2MSA_Dictionary_OneToMany.xlsx]

## Sheet: Sheet1
MSA	Meaning 1	Meaning 2	Meaning 3	Meaning 4	Meaning 5	Meaning 6	Meaning 7
لحم الرجل	موزة
لم	ما
مادة اللغة الفرنسية	فرنسي
آتي	آجي	بآجي
آخذ	أوخذ
آخذك	أوديك
آخذكِ	أوديكي
آخر	ثاني
آخرين	ثانيات
آلة تهوية	مروحة
آلة كاتبة	طابعة
آيس كريم	بوزا
أؤجر	استأجر
أبحث	أدور	بدور
أبدل	أغير
أبقى	أظل
أبلغه	قله
أبنية	بنايات
أبواب	بواب	منافذ
أبوابه	بوابه
أبيت	أبات
أبيض	أبيظ
أتجنب	اتوقى
أتحدث	أحكي	بحكي
أتحقق	اتأكد	أشيك
أتذكر	بتذكر
أتذوق	أذوق
أترجل	أنزل
أتركها	أسيبها
أتزوج	أجوز
أتصل	أرن	بحكي
أتعاطه	آخذه
أتعجب	مستغرب
أتقيأ	أراجع
أتلقى	شفت
أتناول	أشرب	أوكل	آخذ	آكل
أتوبيس	باص
أتوجه	أوجه
أتيقظ	صحيت
أثرية	قديمة
أثناء	خلال
أجاب	جاوب
أجد	ألاقي	لقيت
أجدر	أحسن
أجدها	ألاقيها	لقيتها
أجر	أجرة	تكلفة	راتب
أجرة	أجار
أجري	أركض	أعمل
أجعل	أخلي	أعمل	حط
أجل	اه	اها	أكيد	أها	أيوه	نعم
أجلس	أقعد
أجمل	أحلى
أجود	أحسن
أجيب	أجاوب
أحببت	حاب
أحبذ	بحب
أحبك	بحبك
أحبها	بحبها
أحتاج	بدي
أحجام	سايزات
أحد	حا	حدا	وحدة
أحد عشر	إحدعشر
أحدق	بسرح
أحذية	بواط	كنادر
أحصل	استلم	أجيب	أحصّل	ألاقي	أوخذ
أحصل على	بلاقي
أحضر لي	هاتلي
أحضرت	جبت
أحمر	إحمر
أحمر الشفاه	حومرة
أحياناً	مرات
أخبرني	خبرني	قلي	قوللي
أخبره	قله
أخد	اخظ
أخذتني	توخذني
أخرج	أطلع	طلع
أخرجته	طلعته
أخرى	ثانية	زيادة	غير	كمان
أخريات	كمان
أخشى	بخاف	خايف
أخضر	اخظر
أخطأت	غلطت
أخطئ	بغلط
أخطاء	أغلاط
أخمن	بتوقع	بفكر
أداء	أساوي
أداة	شغلة
أدراجنا	ورانا
أدرك	أدري	أعرف	لحقت
أدري	بعرف
أدعوك	اعزمك
أدفأ	أدفى
أدنى	أقل
أدوات	أغراض	أغراظ
أديرها	ألفها
أذذهب	أروح
أذكر	أتذكر
أذهب	اروح	أروح	بروح
أراحني	ريحني
أراك	بشوفك
أراه	بشوفه
أراها	أشوفها
أربعاء	أربعا
أربعة عشر	اربعطعش
أربعون	أربعين
أربعينات	أربعينيات
أرتدي	ألبس
أرتقي	أطلع
أرجاء	حوالين
أرجو	بتمنى
أرحل	اروح
أرز	رز
أرسل	أبعث	أودي	ودي
أرسله	وديه
أرشح	برشح
أرشدتني	ادلني	تدلني
أرضية	أرض
أرعاه	أربيه
أرغب	بدي	حاب
أرقت	كبيت
أركنها	أصفها
أرن	أرن
أرني	فرجيني	ورجيني	وريني
أرى	أشوف
أريتني	تفرجيني	توريني
أريد	بدي	حاب
أريك	أورجيك	أوريك
أزرار	كبسات
أزرق	إزرق
أزكي	بنصح
أزور	أروح
أزيل	أشيل
أساسي	أصلي
أساسية	ضرورية
أساعدك	أخدمك
أستاذ	إستاذ
أستاذة	آنسة
أستبدل	أصرف
أستدعيك	أناديك
أسترخي	اتمدد
أستطع	قدرت
أستطيع	بقدر	قادر	قدرت
أستعيد	آخذ
أستعير	استقرض
أستقل	اركب	أطلع	آخذ
أستقلها	اركبها
أستمع	أسمع
أسرة	عيلة
أسرتك	عيلتك
أسرع	سرّع	طير	عجّل
أسفل	تحت	سفل
أسلك	أمشي
أسناني	سناني
أشاهد	اشوف	أتفرج	أحظر
أشد	أكثر
أشعر	بحس	حاس
أشغل	اولع
أشهر	شهور
أشياء	شغلات
أصبح	أصير	صار
أصبحوا	صاروا
أصدر	أطلع	طلع
أصدقاء	رفقة
أصدقائي	صحابي
أصطحب	أوخذ	آخذ
أصطحبك	أوديك
أصعد	أطلع
أصفف	أعمل
أصل	أوصل
أصناف	أنواع
أصنع	أعمل
أصيب	انصاب	صار
أضاف	زاد
أضرحة	قبور
أضطر	بظطر
أضع	أحط
أضعت	ظيعت
أضعها	أحطها
أضيق	أقيف
أطباق	أكلات	صحون	وجبات
أطلب	أتصل
أطلع	أشوف
أطلعت	تشوف
أطلعك	اخبرك
أظن	بتوقع
أظهر	بين
أظهرها	طلعها
أعاقبك	أورجيك
أعبر	بتقطع
أعتقد	أظن	بتوقع	بظن
أعتني	اهتم	أدبر
أعثر	ألاقيه
أعد	أعمل	عيد
أعضاء	أعظاء
أعط	إعطي
أعطني	إنطيني	أعطيني	عطيني
أعطه	إعمله
أعطياني	أعطوني
أعطيتني	إنطيتني	ناولني
أعقد	أعمل
أعلم	بعرف
أعلن	بعلن
أعلى	فوق
أعمدة	عمدان
أعمل	بشتغل
أعواد	عيدان
أعوام	سنين
أعود	أرجع
أعيد	ارجع
أعيده	أرجعه
أعيدها	أرجعها
أعيش	ساكن
أغادر	أروّح	أطلع
أغسطس	آب
أغلق	أسكر	تسكر
أغلقت	سكرت
أغير	أبدل
أفحص	أشوف	أشيك
أفرق	بفرق
أفضل	أحسن	أحلى	أهم	بفظل
أفعل	أساوي	أعمل
أفهم	بفهم	فاهم
أقاربنا	قرايبنا
أقداح	كاسات
أقدامك	إجريك
أقدر	بحترم	ممنون
أقدم	أضيف
أقراص	حبوب
أقص	أقصر
أقصى	أكبر
أقصى سرعة	أسرع
أقضي	أظل
أقطعها	أقصها
أقفاص	صناديق
أقل غلاء	أرخص
أقلعت	طلعت
أقم	عملت
أقود	بسوق
أقول	أحكي
أقوم	أساويها	أعمل	بعمل
أقيم	اسكن	أقعد	قاعد
أكتوبر	عشرة
أكثر	زيادة
أكثر شعبية	مشهورة
أكل	طبق
أكمام	كمام
أكمل	كمّل
ألا	ما
ألتقط	اوخذ
ألفه	بيعرفه
ألقاك	بشوفك
ألقي نظرة	أشوف
ألم	وجع
أليس	ما	مش
أليس كذلك	صح
أليست	مش
أم	ولا
أمارس	ألعب
أمام	قدام
أمامي	أول
أمة	شعب
أمتعة	اغراض	شناتي	شنتات
أمتعتك	شناتيك
أمتعتي	اغراضي	اغراظي	شنطي
أمتلك	معي
أمر	شغلة	قصة	موضوع
أمس	امبارح	مبارح
أمسية	ليلة
أمضيناه	قضيناه
أمطار	شتا
أمعن التفكير	أصفن
أمكث	أظل
أملأ	أعبي
أملئ	بعبي
أملس	ملسة
أموال	مصاري
أن	إنه
أنت	إنت
أنتظر	أستنى
أنتقل	أروح
أنتهي	أخلص
أنزلتني	تنزلني
أنزلني	نزلني
أنظر	أشوف
أنظم	أرتب
أنفق	أصرف
أنفقت	صرفت
أنقص	اقلل
أنقل	أحول
أننا	إنّا
أنني	إني
أنها	هاي
أنوي	ناوي
أنيق	لايق
أهيئ	أشغل
أو	ولا
أواجه	ألاقي
أواصل	أكمل
أوافق	موافق
أوبرا	أوبيرا
أوتوماتيكية	أوتوماتيك
أود	بدي	حاب
أودع	حط
أودعته	تركته
أوصلك	أشبكك
أوقف	الغي
أول	واحد
أوه	ييه
أي	أيّا	شو	كل
أيام	إيام
أيس كريم	بوزة
أيضا	كمان
أيضاً	برضه
أيقظني	صحيني
أيمكنك	بتقدر
أيمن	يمين
أين	من وين	وين
أيهما	أي وحدة	مين
إبريق	بريق	بكرج	قربة
إبريل	نيسان
إتصال	تواصل
إتمام	نهاية
إجابة	جواب
إجازات	عطل
إجازة	عطلة
إجازتك	عطلتك
إجراء	اعمل
إجراء مكالمة	أتصل
إجمال	كله
إجمالي	كلها	كلي
إحداها	وحدة
إحدى عشر	إحدعش
إحراق	حرق
إحضار	جيب
إحمر	أحمر
إخبارك	احكيلك
إدارة	لف
إدراج	انحسبت
إدعاء	دعوة
إذاً	لعاد	يعني
إذن	لعاد	معناته	يعني
إرشادات	تعليمات
إسطوانات مدمجة	سيديات
إصدار	طبع	نطلع
إضاءة	إظاءة
إضافي	زيادة
إضافية	ثانية	زيادة
إعطني	أعطيني
إعياء	تعب
إفطار	فطور
إلا	غير
إلهي	ربي
إلى	عال	على	ل
إلى جانب	غير
إلى هذا الحد	لهالدرجة
إما	يا
إنجلترا	إنقلترا
إنجليزية	إنجليزي
إنفاق	دفع
إننا	إحنا
إنني	أني
إنه	هاذ	هو
إنها	هاي	هي
إنهاء	نخلص
إنهم	هظول	همه
إياب	رجعة
إيجاد	ألاقي
إيجادها	يلاقوها
إيجار	اسئجار	أجار
إيداع	أمانات
إيداعها	وصلت
إيشارب	شال
إيصال	وصل
ابتعد	بعد
ابدأ	ببدا	بلش	شغل
ابطأ	شوي شوي
ابغي	بدي	حاب
ابق	خليك
اتبعت	مشيت
اتجاه	جهة
اتجاه مستقيم	دغري
اتجه	روح	لف
اتخذ	إعمل
اتركه	خليه
اتساءل	بفكر	مستغرب
اتصل	رن
اتصلت	رنيت
اثنا عشر	اثنعش
اثناء	خلال
اثنان	اثنين
اثنتان	ثنتين
اثنتين	ثنتين
اثني عشر	اثنعش
اجتزت	عديت
اجرة	أجار
اجعل	خلي
اجلس	اقعد
اجمع	جمع
احترس	انتبه
احتساء	شرب
احتفظ	خلي
احتياجات	أشياء
احدعش	نوفمبر
احذية	كنادر
احصل	اوخذ
احضر	أجيب	أداوم	آجي	تعال	جيب	هات
احفظ	خلي
احمل	شيل
اختبار	امتحان
اختر	إختار
اختيارات	خيارات
اخلع	إشلح
ادخر	احتفظ
ادخل	أفوت	دخّل	فوت
اذهب	روح
ارتداء	لبس
ارتطم	خبط
ارتفاع	علي
ارتفع	زاد
ارشح	بنصح
ارغب	بدي	حاب
اريد	بدي
ازدحام	زحمة
استئصال	شيل
استحمام	حمام	سباحة
استخدام	تشغيل
استخدم	استعمل
استخدمها	إستعملها
استدر	لف
استدع	جيب
استدعي	اطلب	جيب	نادي	ناديلي
استرحت	ارتحت
استرداد	أرجع	ترجيع
استطلع	أتفرج
استعدت صحتي	طبت
استعيد	ارجّع
استغراقك	أخذت
استقطاع	أستلف
استقل	اركب
استلق	اتمدد
استلقي	تمدد
استمتع	انبسط	بنبسط	كيّف
استمتعت	كيفت
استمتعنا	كيفنا
استمر	كمل
استمرت	ظلت
اسجل دخول	أنزل
اسم	إسم
اسمي	إسمي
اشتقت	إشتقت
اشجار	شجر
اصلح	صلح
اضغط	اكبس
اطفال	صغار	ولاد
اعتاد	تعود
اعتزم	قررت
اعتقادك	رايك
اعتقد	بتوقع
اعتن	اهتم
اعذريني	سامحيني
اعطني	اعطيني	هاتلي
افحص	اتفقد
افضل	أحسن
اقترب	قرب
اقترح	بقترح
اقلام	قلام
اكتملت	خلصت
الآخر	الثاني
الآخرين	الناس
الآن	حاليا	هسا
الأحمر	لحمر
الأقدام	الجرين
الأكمام	الكمام
الأمر	الشغلة	الموضوع	الوضع
الأيسر	اليسار
الإضاءة	الضو
الإضافية	الزيادة
الاختلاف	الفرق
الاسترداد	الترجيع
التالي	الجاي
التخفيض	الخصم
التفضل	الرجاء
التقطت	أخذت
التكلفة	الحساب
التي	اللي
الثانية	ثنتين
الجميع	الكل
الحافلات	الباصات
الحصول	أحصّل
الحمراء	الحمرا
الخارج	برا
الخاص	المميز	تاع	تبع
الخاص ب	تاع
الخاص بك	تاعك
الخاص بي	تاعي	تبعي
الخاصة	اللي	تبعت
الخاصة بك	تاعيتك
الخاصة بي	تاعيتي	تبعتي	قيتي
الدخول	الفوته
الدور	الطابق
الدولارات	دولرات
الذي	اللي
السوستة	السحاب
السيد	الاستاذ
السيدات	الستات
السيدة	الست
الشديدة	القوية
الشيال	العامل
الصحيح	الصح
الطازج	طازا
الطبيب	الدكتور
الطعام	الأكل
الطقس	الجو
العالم	الدينا
العشاء	العشا
العظمى	الكبيرة
العمل	الشغل
الغد	بكرة
القادم	الجاي
القادمة	الجاية
القسيمة	الوصل
القصة	السولافة
الكرة	الطابة
اللعنة	يلعن
المائدة	السفرة
الماضي	زمان
المتجهة	رايحة
المحتوي	اللي فيه
المحطة	الموقف
المدينة	البلد
المرور	السير
المزيد	اكثر	زيادة	كمان
المساء	الليل	الليلة
المسار	الطريق
المظروف	الظرف
المعطف	الكبوت
المعياد	الموعد
المفقود	الضايع
المقاس	الحجم
المقبل	الجاي
المقبلة	الجاية
المقعد	الكرسي
المميز	الخاص
المناخ	الجو
المنزل	الدار
المنضدة	الطاولة
النافذة	الشباك
الواحدة	وحدة
الوقت	الساعة
اليد	الإيد
امض	وقع
املأ	تعبي	عبي	ملي
انتظر	استنى
انتظرني	استناني
انتقل	روح
انتقلنا	رحلنا
انتم	إنتو
انخرطت	انبلشت
انظر	اتفرج	شوف
انعطاف	لف
اهبط	إنزل
اهلاً	أهلين
اود	حاب
اين	وين
بأس	مشكلة
بأسناني	بسناني
بإمكاني	بقدر
باجر	بكرة
بادئ	أول
باستثناء	ما عيدا
باستخدام	عن طريق
باكر	بكير
بالتأكيد	طبعاً
بالتاكيد	أكيد
بالحقيقة	صراحة
بالداخل	جوا
بالزبط	بعينه
بالضبط	بالزبط
بالطبع	طبعاً
بالغان	كبار
بالفعل	فعلاً	فعلياً
بالقرب	جنب	قريب
بالكامل	علأخير	كله
بالمائة	بالمية
باهظ	غالي
ببطء	شوي شوي
بتحث	بتشجع
بتفضله	بتحبه
بجوار	جنب	عند
بجواري	بحدي
بحاجة	بتحتاج	لازم
بحالة جيدة	تمام	طيب	مليح
بحثت	أدور
بخطط	بفكر
بدأ	بلش
بدأت	بديت
بداخلها	جواتها
بدل	اصرف	بدال	غير
بدلت	اتبدل
بدون	بلا
بدين	ناصح
بذلة	بدلة
بذلك	هيك
برايز	أباريز
برتقال	بردقان
برثية	رسالة
برجر	برقر
برد	رشح
برطمان	قطرميز
برقية	رسالة
برهة	شوي
بريد	صفحة
بزة	سترة
بزتك	سترتك
بسبب	عشان
بسهولة	ببساطة
بسيطة	سهلة
بشدة	كثير
بشكل جيد	مليح
بضائع	بظايع
بضعة	كم
بطاطس	بطاطا
بطاقات	كروت
بطاقات بريدية	رسائل
بطاقة	كرت	ورقة
بطاقة بريدية	رسالة
بطانية	حرام
بعد الآن	من هون وطالع
بعض	شوي	شوية	نتفة
بعناية	بدقة
بعينه	معين
بغادر	بطلع
بفرديهما	لحالهم
بقدر	أستطيع
بقشيش	بخشيش
بك	فيك
بكاء	عياط
بكم	فيكم
بلاد	بلد
بلاغ	شكوى	مذكرة
بلدة	مدينة
بما يكفي	كفاية
بمجرد	بس
بمقدورك	بإمكانك
بنزين	بانزين
بنفسك	لحالك
به	فيه
بها	بيها
بهلوان	مهرج
بهم	فيهم
بواب	شغيل
بواسطة	بسبب
بوليصة	وثيقة
بي	فيّ
بياضات	شراشف
بيان	استلام
بيت	دار
بيد	بس
بيرة	بيرا
بيضاء	بيضا	بيظا
بيعت	انباعت
تأت	تيجي
تأتي	بتصل	بتيجي	تيجي
تأجير	أجار
تأخذ	بتقبل	توخذ
تأخذني	توديني
تأسيس	فتح
تأكل	توكل
تؤخر	بتأخر
تؤلمني	بتألمني	بتوجعني
تائه	تايه	ضايع
تاسعة	تسعة
تاكسي	تكسي
تبحث	ادور	بدّور
تبدأ	بتبلش	تبدا
تبدلوا	تصرفوا
تبدو	بتبين	شكلك	شكلها	مبين
تبديل	بدل
تبغي	بتحب
تبقى	تظل	ظل
تبلغ	توصل	طلعت
تبلغ رسوم	تكلف
تبللت	انبليت
تتابع	بتابع
تتاح	تصح
تتجه	رايحة
تتحدث	بتسولف	تحكي
تتحقق	تتأكد
تتدلى	تنزل
تتسع	توسع
تتطلع	متحمس
تتفضل	تتكرم
تتقاضى	بتوخذ	توخذ
تتلق	اخذت
تتلقاها	توصلك
تتلقى	تستقبل
تتم	بتصير
تتمتع	تستمتع
تتناول	توكل
تتهجي	بتنلفظ
تتوقف	توقف
تتيقن	تتأكد
تثملني	يسكرني
تثير	بتخليني	بتلفت
تجد	تلاقي
تجده	تلاقيه
تجري	تعمل
تجعل	بتخلي
تجلب	تجيب
تجهيز	جهزتوا
تجولت	طشيت
تحب	بتحب	بدك
تحتاج	بدك
تحتسي	تشرب
تحتفظ	تخبي	تظب
تحتفظوا	تخلو
تحدث	احكي
تحدثت	تسوبف
تحصل	توخذ
تحضر	تجيب
تحضر لي	تجيبلي
تحقق	اتأكد	شيك
تحققت	تأكدت
تحلق	بطير
تحملت	تورطت
تحويل	دوار
تحية	ترحيب
تخبرنا	تحكيلنا
تخبرني	تحكيلي	تقلي
تختار	تنقي
تخرج	تطلع
تخص	خصيت
تخطر	تبلغ
تخطط	تنوي	ناوي
تخفض	تنزل
تخفض سعرها	ترخصها
تخفيضات	خصومات
تخلص	كب
تخلع	تقلع
تدلني	ادلني
تدون	تكتب
تذكرة	وصفة
تذكرتان	تذكرتين
تذهب	تروح	تيجي
ترتب	تصفط
ترتدي	بتلبسي	تلبس	لابسة
ترتديه	لابسيته
ترتفع	تطلع
ترسل	تودت	تودي
ترسلها	تبعثها	توديها
ترسلهم	تبعثهم
ترسلوها	تودوها
ترسيخ	تاكيد
ترشح	تقترح
ترشدني	ادلني
ترغب	بدك	حاب
ترفع	تعلي
ترقيتك	رفعوك
تركب	تحط
تركت	خليت	سبت
تركته	سبته
تركل	تشوط
ترني	توريني
تروى	هدّي
ترى	بتشوف
تري	شايفة
تريد	بدك
تريدها	بتحبها
تريني	تفرجيني	تورجيني	توريني
تزال	تظل
تزكي	تنصح
تزلج	تزحلق
تزن	توزن
تزور	بيزورو
تزيد	بتزيد
تسببت	سوت
تستبدل	تبدل
تستبدلها	تبدلها
تستحق	بتستاهل	بتسوى	تستاهل
تستحوذ	بتسيطر
تستخدم	بتستعمل
تستدعي	تجيب	تنادي
تستريح	ترتاح
تستطيع	بتقدر
تستغرق	بتوخذ	بدها	توخذ
تستقل	تطلع
تستمر	تظل
تسدد	تدفع
تسري	بتظل
تسعة عشر	تسعطعش
تسوق	سوق
تسير	تتحرك	ماشية
تشذب	ترتب
تشعر	بتحس
تشمل	شاملة
تصبح	تصير
تصحبني	توخذني
تصدر	إطلع	بطلع	تطلع
تصريح	إذن
تصف	تشرح
تصل	توصل
تصلح	اتصلح
تصميم	شكل
تصميمات	أشكال
تضبط	تزبط
تضضري	جبتي
تضطر	تظطر
تضع	تحط	تركب
تضغط	تظغط	تكبس
تضم	شاملة
تضيف	تظيف
تطلب منه	تخليه
تطلق النار	اطخ
تطيل	اطول
تظهر	تبين
تعاقب	بروح
تعالى	تعال
تعبر	تقطع
تعتقد	شايف
تعتني	تنتبه
تعثر	وقع
تعثروا	تلاقوا
تعجبني	عاجبيتني
تعدني	توعدني
تعريفة	تذكرة
تعزم	ناوي
تعطلت	خربت
تعطني	تنطيني
تعطي	تنطي
تعكس	بتبين
تعلم	بتعرف
تعمل	تشتغل	شغالة
تعملون	بتشتغلوا
تعني	قصدك
تعنيها	قصدها
تعهدت	وعدت
تعود	ترجع
تعويضي	تعوظني
تعيد	ترجع
تعيدني	ترجعني
تعيدون	ترجعوا
تعيش	عايش
تغادر	بتطلع	تطلع	رايح
تغلف	تلف
تغلقون	بتسكروا
تغير	أصرف	بتصرف	تبدل	تحول	تصرف
تغير العملة	صرافة
تغيير	نعدل
تفاصيل	تفصيل
تفتحون	بتفتحوا
تفحص	تشوف	تشيك
تفرض	تنفرظ
تفصل	توضح
تفضل	أخذ	بتحب	تفظل
تفضلها	بتحبها
تفعل	بتساوي	تعمل
تفعلوا	تعملوا
تقاضى	أخذ
تقام	بتبلش
تقبض	تمسك
تقبل	توخذ
تقترح	تدلني
تقديري	تقريبي
تقديم	توزيع
تقرأ	تقرى
تقرضني	تعيرني
تقريباً	بحدود
تقرير	بلاغ	نشرة
تقسيم	تقسم
تقفل	تسكر
تقلب	تغير
تقلع	تطلع
تقلق	تخاف
تقليدي	شعبي
تقليدية	تراثية
تقول	تحكي
تقول لي	تقلي
تقوم	تعمل
تقيم	تظل	تعمل	قاعد
تكرار	انعاد
تكرر	تعيد
تكف	تبطل
تكلم	احكي
تلائم	تناسب
تلاحظ	شايف
تلفت	خربن
تلفون عملة	كبينة
تلقى	بتجيب
تلك	هاي	هذيك
تلمح له	قصدك
تليفون	تلفون
تم	صار
تماما	بالزبط
تماماً	كثير
تمتع	استمتع
تمتعت	انبسطت
تمزح	بمتزح
تملأ	تعبي
تملأها	تعبيها
تمنح	بعطوا
تمنحني	تعطيني
تناسب	بتليق
تناول	أخذ	أشرب
تناولت	أخذت	أكلت
تناولنا	بنوكل
تنتظر	تستنى
تنتقل	تروح
تنتهي	بتخلص	تخلص
تندة	مظلة
تنضم	تشترك	تيجي
تنظر	تشوف
تنظيف	غسيل
تنقضي	تخلص
تنقل	بتودي
تنهي	تخلص
تهجى	هجي
تهدأ	تروق
تهذب	تحلق
توابل	بهارات
تواً	هسا
توجد	في
توجهنا	تدلنا
تود	بدك
توصي	بتنصحني	تنصح	تنصحني
توضح	تشرح
توضيب	ترتيب
توقظني	تصحيني
توقف	وقّف	وقف
توليت	تكفلت
تُرى	يا ترى
ثالث عشر	ثلطعش
ثامنة	ثمانية	ثمنية
ثانية	ثنتين
ثانية عشرة	إثنعش
ثلاث	ثلث
ثلاثون	ثلثين
ثم	بعدين
ثمان	ثمن
ثمانية	ثمن	ثمنية
ثمة	أي	في
ثمن	تكلفة	حق
ثمنها	حقها	سعرها
ثمين	غالي
ثوب	فسطان
ثياب	أواعي
جئت	جيت
جاءت	اجت
جائعون	جيعانين
جادة	شارع
جالون	قلن
جانب	جنب	جهة
جانبها	جمبها
جانبين	جهتين
جبن	جبنة
جدا	كثير
جرعة	مرة
جرى	ركظ
جزاء	جزا
جزار	لحام
جزيل	كل
جزيلا	كثير
جسم	حجم
جغرافيا	تظاريس
جلد	بشرة
جلس	قعد
جما	كثير
جميعهم	كلهم
جميل	حلو
جميلات	بسطلن
جميلة	حلوة
جنيه	قنيه
جوار	جنب
جواً	بالطيارة
جولة	دورة	لفة
جونلات	تنانير
جيب	جيبة
جيد	تمام	رايق	طيب	كويس	مرتب	مليح
جيدة	حلوة	مليحة
حائط	حيط
حائك	خياط
حاجيات	حاجات
حاد	قوي
حادية عشر	إحدعش
حار	حامي	نار
حاصل	معي
حافظة	جزداني	محفظة
حافظة نقود	محفظة
حافلات	باصات
حافلة	باص
حال	وضع
حالا	هسا
حاليا	هسا
حامضة	حامظة
حان	صار
حتى	عشان	ل	لحد	لعند
حجرة	غرفة
حجرتك	غرفتك
حجرتنا	غرفتنا
حجرتي	غرفتي
حدة	لحال
حدث	صار
حدوث	يصير
حديثة	جديدة
حذاء	كندرة
حرر	اكتب
حريمي	ستاتي
حزام	قشاط
حزمت	جهزت
حساء	شوربة
حساس	بتحسس
حسن	تمام
حسن جداً	ممتاز
حسنا	تمام	طيب	ماشي
حصول	أوخذ
حصيرة	درج
حضرت	اجيت
حفاضات	حفاظات
حفل	حفلة
حفلات الزواج	أعراس
حقا	بصراحة	جد	فعلا
حقائب	شنتات	شنتاتي
حقائبك	شناتيك
حقائبي	شنتاتي
حقاً	صح
حقبة	فترة
حقيبة	شنتة	شنطة
حقيبتك	شنتك
حقيبتي	شنتي	شنتيتي
حقيبتين	شنتتين
حقيقة	فعلاً
حلاء	حلو
حلوى	حلو
حمال	عتال
حمام	دش
حمراء	حمرا
حمل	خروف	شيل
حمى	حرارة
حني	أنزل
حوالي	تقريبا
حول	حوالين
حولنا	حويلانا
حيال	عشان
حين	لما
حينئذ	بهالوقت
حينما	لما
خادم	عامل
خادمة	خدامة
خارج	برا	طالع
خاص	تاع
خاص بالنساء	ستاتي
خاصة	مميزة
خاطئ	غلط
خاطف	حرامي
خافت	باهت
خال	خالي
خالية	فاظية
خام	أساسية
خامس	خمسة
خامس عشر	خمسطعش
خامسة	خمسة
خبرني	قلي
خدش	شخط
خذ	أخذ	هاك	ودي
خذني	أخذني	وديني
خذها	خظها
خرائط	خرايط
خرج	طلع
خزينة	صندوق
خصوصي	خاص
خصيصا	خصوصي
خضار	خظرة
خضراء	خضرا
خضروات	خضرة
خطأ	غلط	غلطة
خطاب	رساالة	رسالة
خطابات	رسايل
خطف	سرق
خفض	قلل
خفضها	تنزلها
خلاب	حلو
خلعت	شلحت
خلف	قفى	ورا	ورى
خمر	عرق
خمر أبيض	عرق
خمسة عشر	خمسطعش
خمسة عشر	خمسطعشر
دائم	عطول
دائما	دايما
داخل	جوا
داكن	غامق
دجاج	جاج
دخلت	فتت
دخوله	فوته
دراجات	بسكليتات
دراسة	قراية
درجة أولى	الفخم
دش	فوت
دعنا	خلينا	يلا
دعني	خليني
دعوة	عزومة
دفع	دز
دقائق	دقايق
دقة	بالزبط
دناءة	وساخة
دواء	دوا
دوار	دوخة
دور	طابق
دورقاً	دورقة
دولار	دولر
دون	سجل
دونت	تكتب
دي جي	ديجيه
ديسمبر	إثنعش
ذات نكهة	طيبة
ذاتها	نفسها
ذاتي	شخصي
ذاك	هاذ	هذاك	هظاك
ذاهب	رايح
ذاهبة	رايحة
ذراع	إيد
ذلك	هاذ	هاظ	هذاك	هيك
ذهاب	روحة
ذهب	رحت
ذهبت	رحت
ذو	أبو
ذوقي	زوقي
ذوي	أصحاب
ذي	أبو
رأس	راس
رأسي	راسي
رأيت	شفت
رأيتها	شفتها
رأيك	رايك
رئيسي	عام
رائحة	ريحته
رائحته	ريحتة
رائع	بجنن	حلو	حلوة	ممتاز	مميز
رائعة	روعة	ممتعة
رابع عشر	أربعطعش
راجع	شيك
رامن	نودل
ربما	بجوز	ممكن	يمكن
رجاءً	يا ريت
رجل	زلمة
رجلي	إجري
رحلة	سفرة
رداء	جاكيت
ردت	رجعت
رزانة	ثقل
رسائل	رسايل
رسم	فلوس	مصاري
رسومات	رسمات
رشحت	اخترت
رصيف	سكة	كورنيش
رطل	كيلو
رقمية	الكترونية
ركلة	تسديدة
ركن	زاوية
ركوب	طلعة	طلوع
رواق	صالة
روحة	ذهاب
روشتة	وصفة
روشيتة	الوصفة
روعة	رتابة
ريح	هوا
زائد	زايد	زيادة
زائدة	زايدة	زيادة
زجاج	قزاز
زجاجات	قناني
زجاجة	قنينة
زحام	زحمة
زد	زيد
زر	كبسة
زعاف	قاتل
زلاجات	زحاليق
زلاقات	زلاجات
زلزل	زلزال
زلق	يزحلق
زمام	زمة	سحاب
زمن	مدة
زوج	جوز
زوجتك	مرتك
زوجتي	مرتي
زوجي	جوزي
س	رح
سائحين	سواح	سياح
سائر	ماشي
سائرون	ماشيين
سائق	سايق
سابع	سبعة
سابع عشر	سبعطعش
سابعة	سبعة
ساخن	حامي
ساخن	حامية
ساخنة	حامية
سادسة	ستة
ساري	شغال
ساندوا	ساعدوا
ساندوتش	سندويشة
سبتمبر	تسعة
سبعاً	سبعة
سبيل	طريقة
ستار	برداية
ستة	ست
ستة عشر	سطعش
سترات	جواكيت
ستستغرق	بدها
ستمية	ستمائة
سجائر	دخان	سجاير	سقاير
سجق	نقانق
سجل	اكتب
سحجة	شخط
سخيف	مسخرة
سر	امشي
سراويل	بنطلونات
سررت	إنسريت
سرق	انسرق
سرقت	انسرقت
سروال	بنطلون
سرير	تخت
سريرين	تختين
سريعاً	بسرعة
سعال	قحة
سعداء	مبسوطين
سعدت	انبسطت
سعر	حق
سعره	بسوى
سعيد	مبسوط	مبصوط
سعيدة	هنية
سفح	تحت
سقطت	طاحت	وقعت
سكين	سكينة
سلاطة	سلطة
سلب	سرقة
سلك إمداد	وصلة
سلكت	مشيت
سمك الثعبان	انقليس
سن	عمر
سنتيمتر	صانتي
سنحت	صحت
سنوات	سنين
سوستة	زراد	سحاب
سوف	راح	رح
سوى	إلا
سيء	زفت
سيئ	مش مليح
سيتم	رح
سيد	استاذ
سيدات	ستات	نسوان
سيدة	آنسة	ست	مدام
سيدتي	ستي
سيدي	استاذي	إستاذ	حجي	سِيدي
سيذهب	يروح
سير	مشي
سيرا	تمشاي
سيستغرق	بدها
سَيدي	سِيدي
شأن	علاقة
شاب	شب
شابات	صبايا
شابين	شبين
شاربي	شواربي
شاطئ	شط
شاغر	فاضي
شاغرة	فاضية
شامل	كامل
شبان	شباب
شخص	حد	واحد
شخص ما	حدا
شدة	صعوبة
شديد	قوي	كثير
شديد الحرارة	شوب
شرائها	مشتراها
شراب	عصير
شربة	شوربة
شرخ	شق
شرفة	برندة
شريحة	قطعة
شريحتين	قطعتين
شطيرة	سندويشة
شطيرتين	سندويشتين
شغلك	عملك
شفاه	شفايف
شقيقة	أخت
شكرا لك	ممنون
شكراً لك	مشكور
شهير	مشهور
شهيرة	معروفة
شوكولاته	شقلاطة
شوي	بعض
شيء	اشي	شغلة	شوية	شي
شيئاً	إشي
شيد	عمّر
شيق	حلو
شيقة	حلوة
شيك	شك
صائبة	صحيحة
صاخب	عالي
صباح	الصبح	صبح
صباحاً	الصبح
صبي	ولد
صحف	جرايد
صحيح	صح	مزبوط
صحيفة	جريدة
صداع	عندي
صدع	شق
صدم	ادحم	خبط
صديق	رفيق	صاحب	صاحبي
صرافون	سمسارين
صرف	تحويل
صعوبات	مشاكل
صعود	طلعة
صغيرة	شوية
صك	ورقة
صلات	واسطات
صلة	علاقة
صناديق	علب
صندوق	طبون	كشك
صندوق السيارة	طبون
صنعها	عملها
صنعوا	سووا
صواب	مناسب
صياغة	صيغة
ضائعة	ضايغة	ظايعة
ضباط	ظباط
ضبط	ازبط	أظبط	زبط	ظبط
ضجيج	ضجة
ضخ	ظخ
ضخم	دفش
ضد	ظد
ضرائب	ضرايب	ظرايب
ضروري	ظروري	لازم
ضع	حط
ضعه	حطه
ضعها	حطها
ضللت	ضيعت
ضمان	ظمان
ضمنا	معنى
ضهر	ظهر
ضوء	ضو
ضيق	خنقة
ضيقة	ظيقة
طائرة	طيارة
طاردتني	لحقتني
طازج	طازا
طاهية	طباخة
طبق	أكل	أكلة	صحن	مثل
طبقاً	بناءً
طبقين	صحنين
طبيب	دكتور
طراز	موديل	نوع	نوعية
طرحت	انبطحت
طرف	جهة
طرق	خطوط
طريق	شارع
طريق مستقيم	دغري
طعام	أكل	وجبة
طفل	صغير	ولد
طلاء	دهان	مناكير
طلب	طلبية
طليقا	مفرود
طماطم	بندورة
طهي	طبخ
طوال	طول	طول
طويل	كثير
طويلة	بعيدة	رحلة
طيب	زاكي
طيبة	حلوة
ظمآن	عطشان
ظننت	فكرت
ظهيرة	الظهر	ظهر
عائلات	عيل
عازب	عزابي
عاشر	عشرة
عاشرة	عشرة
عام	حكومي	سنة
عامل	موظف
عبارة	جملة
عثرت	لقيت
عثور	يلتقى
عد	ارجع
عدا	إلا	عيدا
عدة	كم
عدم	ما
عذرا	معلش
عذراً	عفواً
عربة	عرباية
عرضة	ممكن
عرفتني	تدلني
عريضة	واسعة
عزيزي	حبيبي
عسيرة المضغ	قاسية
عش الغراب	فطر
عشاء	عشا
عصى	عصاة	عصي
عصيراً	عصير
عطفك	طيبتك
عظيم	مرتب	ممتاز	وااو
عفوا	معلش
عقار	دوا
علامة	إشارة
علة	مشكلة
علمت	سمعت
علوي	فوقاني
على	ع
على أي شيء	على شو
على الإطلاق	أبداً
على الموضة	دارج
على انفراد	لحالها
على حدا	لحال
على ما يرام	كويس
علي أن	لازم
عليك أن	لازم
عمل	شغل
عملاء	زباين
عملات معدنية	فراطة
عمومي	عام
عند	لما
عندئذ	بالوقت
عندكم	عندكو
عندما	بس	لما
عندنا	عنا
عندي	علي
عنق	رقبة
عودة	أريد	رجعة
عودوا	ارجعوا
عينان	عيون
عيناي	عيوني
غادر	طلع
غادرت	روحت
غامق	داكن
غثيان	لعية
غد	بكرا	بكرة
غداء	غدا
غذاء	أكل
غرض	هدف
غرفة استراحة	حمام
غضب	زعل
غضون	خلال
غطس	غوص
غلاء	غلى
غلفها	لفها
غلى حد ما	شوي
غير	اصرف	مش
غير	اصرفلي
غير حلو	بدون سكر
غير مشغول	فاضي
فئة	أبو	أم
فئة خمسين	خمسينات
فائق السرعة	سريع
فاتن	بتجنن
فاتني	راح علي
فارغة	فاظية
فارق	فرق
فاكهة	فواكه
فتاة	بنت
فترة	وقت
فترينة	خزانة
فجوة	فتحة
فحسب	بس
فحص	تدقيق
فخذ	فخدة
فر	فل
فراخ	جاج
فرامل	بريكات
فرد	زلمة	واحد
فردي	لواحد
فردين	شخصين
فساتين	فساطين
فسيح	واسع
فشار	بوشار
فصل	حصة
فضلات	زبالة
فضلك	فظلك
فطرية	طبيعية
فعالة	شغالة
فعلا	صراحة
فعلت	سمحت	عملت
فقدت	بطلت	ضيعت
فقط	بس
فك	افرط
فكة	صرافة	فراطة
فكرة	لمحة
فنجانان	فنجانين
فوارق	فرق
فودكا	فوديكا
فوراً	هسا
فوري	دغري
فوط	مماسح
فوطة	ممسحة
في	ب	عند
في الأغلب	غالباً
في الحال	عطول	مباشرة
في الخارج	برا
في الواقع	فعلاً
في تمام	بالظبط	ع
في حالة	إذا
في حيرة	محتار
في غضون	خلال
فيلم	فلم
فيما	بشو
فيما بعد	بعدين
قادم	جاي
قادمة	جاية
قادمتان	جايات
قاعة	صالة
قاموا بها	عملوها
قبيل	زي
قدح	فنجان
قدر	شكل
قدمي	إجري
قدميك	جريك
قس	قيس
قسط	شوي
قشدة	قشطة	كريمة
قشعريرة	قشعيرية
قصارى	كل
قضاء	أقظي
قضتها	عاشتها
قضية	موضوع
قضيت	قظيت	قعدت
قطط	بسس
قطع	انجرح	مزع
قطعة	شقفة
قطعت	جرحت
قف	وقف
قفاز	كفوف
قلادة	سنسال
قلم	قص
قليل	شوي
قليلا	شوي	شوية
قم	اعملها
قمت	سويت
قمع	بوري
قواعد	قوانين
قومية	رسمية	شعبية	وطنية
قيادة	سواقة
قيمة	تكلفة	حق
قيمته	تكلفته
كأس	كاس
كادت	راحت
كارت	كرت
كاف	كافي
كاملاً	بالكامل
كاميرا	كمرة	كميرا
كاميراتي	كمرتي
كاميرتي	كميرتي
كبار السن	ختايرة
كبرى	كبيرة
كبيرة	واسعة
كتاب	دفتر
كذلك	كمان	هيك
كرات	طابات
كرة	طابة
كرم	حسن
كسرت	انكسرت
ككرها	عيدها
كلا	لا
كلام	حكي
كم	قديش	كثير	كو
كم تكلفة	قديش
كم سعر	قديش
كما	زي
كما لو كنت	كإني
كن	كون
كن حذراً	انتبه
كهرباء	كهربا
كهربائي	كهربا
كوب	كاس	كاسة
كوبان	كاستين
كيتشأب	كتشب
كيس	كمادة
كيف	شلون
كيف حالك	شلونك
كيمونو	كمونو
ل	حتى	عشان
لإحدى	لوحدة
لا	لأ	ما	مش
لا بد	اكيد	لازم
لا تزال	بعده
لا توجد	ما في
لا زال	بعد	ظل
لا زالت	بعدها
لا يعمل	خربان
لابد	لازم
لاحق	بعدين	ثاني
لاحقاً	بعدين
لاذع	حامظ
لحضة	لحظة
لحظات	شوي
لحم	لحمة
لدى	عند	لما
لدي	إلي	عندي	معي
لديك	عندك	معك
لديكم	عندكو
لدينا	عنا
لديهم	عندهم
لذا	عشان	عشان هيك
لذلك	عشان	فلهيك	لهيك
لذيذ	زاكية	طيب
لست	مش
لص	حرامي
لطفاء	لطيفين
لطفاً	لو سمحت
لطيف	حلو	حلوة	مليح
لفة	شريط
لفتان	لفتين
لففتها	تلفها
لقائك	شوفتك
لك	إلك
لكن	بس
لكي	حتى	عشان	مشان
للأمام	لقدام
للتو	هسا
للغاية	كثير
لم	ما	مش
لم تعد	راحت
لم يعد	بطل
لماذا	ليش
لن	ما
لنا	إلنا
لو ممكن	يا ريت
لوثوا	نزعوا
لي	إلي
ليس	ما	مش
ليس هناك	فيش
ليست	مش
ليلة	بالليل
ليلية	مسائية
مؤخرة	آخر	خلف
مؤدي	بوصل
ما	اللي	إيش	أي	شو
ما السبب	ليش
ما زالت	بعدها
ما زالوا	بعدهم
ما زلت	بعدني
ما عدا	ماعيدا
ما مقدار	قديش
ما هو عدد	قديش
ما يرام	طبيعتي	مليح
ماء	مي	مية
مائة	مية
مائتي	ميتين
مائدة	سفرة	طاولة
مائلة	مايلة
ماذا	شو
ماذا عن	شو رايك
مارس	ثلاث
ماضية	مبارح
ماكياج	مكياج
مالي	مصرياتي
ماهر	شاطر
مباراة	إمباراة
مباشرة	دغري
مبشور	مبروش
مبلغ	مصاري
مبنى	بناية	عمارة	محل
مبهرجة	بتلمع
متألم	موجوع
متاجر	دكاكين	محلات
متاح	مفتوح
متاحة	فاضية	فاظية	متوفرة	موجودة
متجر	دكان	محل
متجه	رايح
متجهة	رايحة
متزوج	متجوز
متسع	كثير
متسول	شحاد
متضمن	مع
متعبة	تعبانة
متعة	بسط
متعددة	كثير
متعلقات	أغراض	شغلات
متعلقاتي	أشيائي
متلقاتي	اغراضي
متنزه	منتزه
متواترة	قوية
متوسط	معدل	وسط
متى	أميت
متين	قوي
متينة	قوية
مثل	زي	نفس	هيك
مثلجات	بوزا
مثلى	أحسن
مجموع	كل
مجوهراتي	صيغتي
محال	محلات
محبب	محبوب	مرغوب
محبس	حنفية
محتمل	بنطاق
محتويات	مكونات
محجوزتان	مفللات
محدد	معين
محددة	معينة
محضر	محظر
محطة	مجمع	مركز	موقف
محطة بنزين	كازية
محظور	ممنوع
محفظتي	جزداني
محل	صالون
محل الجزارة	ملحمة
محل تجميل	صالون
محل كتب	مكتبة
محلي	بلدي
محلية	شعبية
محمر	مشوي
محمرة	مشوية
محيطة	حويلاها
مختلف	بفرق	ثاني	غير
مختلفة	ثانية
مخدر	بنج
مخروط	بوري
مخزون	مخزن
مخطئ	غلطان
مخفوق	خفق
مد	أمدد
مدببة	مبوز
مدة	وقت
مدخرات	توفير
مدخل	دخلة	عباب
مدرجة	موجودة
مدرس	استاذ
مدينة	بلد
مذاق	طعم
مذاقه	طعمه
مرآة	مراية
مراجعة	أشيك
مربع سكني	حارة
مرتفع	طويل	عالي	غالي
مرجح	متوقع
مرحباً	أهلاً وسهلاً	مرحبا
مررت	تقرب	مشيت
مرشحة	مفلترة
مرشد	دليل
مرقص	ملهى
مركز	صالون
مركزية	رئيسية
مرور	سير
مريب	مشكوك
مزدحم	زحمة	مليان
مزدوجة	مجوزة	مزوجة
مزلاجة	زلاجة
مزيد	أكثر	زيادة	كمان
مزيداً	كمان
مزيل طلاء	أسيتون
مزين	مزركش
مساء	بالليل	مسا
مسائي	ليلي
مسالك	طرق
مسبق	من قبل
مستحضرات تجميل	مكياج
مستردة	ماسترد
مستعد	جاهز
مستند	إثبات
مسرحية	حفلة
مسرور	فرحان	مبسوط
مسطردة	خردل
مسكن	بيت
مسليا	بسلي
مسموح	بصير
مشابهة	زي
مشاهدة	تشوف	شوفة
مشبك	شماعة
مشروب	شراب
مشروباتنا	عصيرنا
مشغل	ورشة
مشوق	بحمس
مصاب	انصاب	معي
مصاريف	أجرة
مصباح	لمبة
مصراع	اباجور	غطا
مصرف	بنك
مصغر	صغير
مصنوع	معمول
مضارب	مظارب
مضبوطة	مزبوطة
مضروب	مخفوق
مضطر	بظطر	مجبور
مطالبة	استلام
مطر	شتا
مطلقا	بالمرة
مطهوة	مستوية
مظروف	ظرف
مظلة	شمسية
مظهره	شكله
معالجات	علاجات
معالجة	علاج
معالم	مناظر
معبئ	مليان
معتاد	عادة
معتدل	لطيف
معتمد	مؤهل
معتمدة	أصلي
معدات	أغراض	عدة
معدة	مجهزة
معذرة	عفواً	معلش
معطف	سترة	كبوت
معطفي	كبوتي
معظم	أغلب
معفاة	معفية
معكم	معكو
معي	معاي
معياد	موعد
معيشة	عيشة
مغادرة	ترويحة
مغلقاً	مسكر
مفاتيح	كبسات
مفتاح	زر
مفتوح	فاتح
مفتوحة	فاتحة
مفردة	لحالها
مفضلة	أحسن
مفقود	ظايع
مقابل	ب
مقاس	حجم	قياس	نمرة
مقاعد	كراسي	محلات
مقاعدنا	كراسينا
مقاعدهم	كراسيهم
مقامة	مبلشة
مقبول	بصير	عادي
مقبولاً	بنفع
مقدر	متوقع
مقدم	عربون	قبل
مقدماً	قبل
مقدمة	راس
مقربة	قريب
مقطوع	مفصول
مقعد	كرسي
مقعدان	كرسيين
مقعدي	مكاني
مقليات	مقالي
مقيس	حنفية
مكالمة	اتصال
مكانك	محلك
مكتب شرطة	مخفر
مكتظ	معبى
مكواة	مكوى
ملأ	تعباية	تعبي
ملأت	مليت
ملئ	مليان
ملئها	أعبيها
ملاءة	عباية
ملابس	أواعي	ثياب	لبس	وعية
ملابسك	أواعيك
ملابسي	وعيتي
ملبس	لبسة
ملصقات	طوابع
ملعقة	معلقة
ملغى	معفي
مم	من شو
مما	من اللي
ممتع	بسلي
ممتعة	مرتبة
ممتن	ممنون
ممزق	إمزع
ممكن	بجوز	بصير	قد
مملوء	مليان	منتلي
مميزة	خاصة
من	مين
من أجل	عشان
من أجلي	عشاني
من أي مكان	منين
من أين	منين
من خلال	عن طريق
من غير	بدون
من فضلك	إذا بتسمح	إذا تكرمت	إذا سمحت	بعد إذنك	تكرم	لو سمحت	ياريت
مناسب	لطيف	مليح
مناسبة	زابطة	صحيحة	مليحة
منتج	صنف
منتجات	شغلات
منتصف	نص
منح	توزيع
منحر	مجال
منخفض	قليل	واطي
منخفضة	قليلة
منذ	من
منذ وقت	زمان
منزل	بيت	دار
منزلك	بيتك
منزلي	بيتي
منضدة	طاولة
منطقة	مكان
منطقة الوسط	الخصر
منظر	إطلالة
منعب	تعبان
منفردا	لحال
منفصلة	لحالها
منقطع	وقف
منهج	برنامج
منهك	تعبان
مهما	قد ما
مهمة	شغل
موائدنا	طاولاتنا
مواصلة	اكمل
مواضع	مناطق
موافق	طيب	ماشي
موتور	ماتور
موردي	موردين
موسم	فصل
موسيقى	لحن
موضة	موظا
موضع	مكان
موضوعة	محطوطة
موعد	وقت
موقعي	مكاني
موقف	مجمع
ميدان	دوار	ساحة
ميزانيتي	مصروفي
ميعاد	موعد
ميعادها	موعدها
ميناء	مينا
نأتي	نيجي
نأخذ	نوخظ
نأمل	متمنيين
نائم	نايم
ناحية	جهة
نادل	جرسون	قرسون	قرصون
ناصية	دخلة
نافذة	شباك
ناولني	أعطيني
نبات	نبتة
نبدأ	نبلش
نبطنها	نحشيها
نبلغ	نخبر
نبيذ	عرق
نبيذ أبيض	عرق
نتتبع	نتابع
نتحدث	بنحكي
نتصل	نرن
نتقابل	نتلاقى
نتناول الغداء	نتغدى
نجتمع	نلتقي
نجح	زبط
نجري	نعمل
نجوب	نلف
نحضر	نجيب
نحن	احنا
نحو	طريقة
نخرج	نطلع
نرغب	حابين
نريد	بدنا
نزهة	رحلة
نساء	نسوان
نستطيع	منقدر
نستقل	نركب
نستمر	نكمل
نسنعد	نجهز
نسوا	نسيوا
نشأت	جاية
نشاهد	نتفرج
نصب	تمثال
نصف	نص
نصل	نوصل
نطرح	نحط
نريد	بدنا
نطلع	نشوف
نظرت	شفت
نظير	بدال
نعروفة	مشهورة
نعقد	نعمل
نعم	اه	صح
نغادر	نطلع
نغلق	بنسكر
نفد	خلص
نفس	حال	مثل
نفسك	حالك
نفسي	حالي
نفضل	بنحب
نفعل	بنساوي	عملنا
نقد	كاش
نقرر	قررنا	نحكم
نقفز	إنط
نقود	مصاري
نقود فكة	فراطة
نقوم	نعمل
نقيم	نبات	نظل
نلتقي	شفنا	نتلاقى
نلقي نظرة	نطل
نماذج	موديلات
نمكث	نظل
نناقش	نحكي
ننسجم	نرتاح
ننعم	نتمتع
نهاية	آخر
نوادي	اندية
نوبة برد	رشحة
نوعا ما	يعني
نوقظك	نصيحك
نيئة	نية
نيابة عني	بدالي
هؤلاء	هظول
ها	هاي
ها أنا	هيني
ها نحن	هينا
ها هو	هاظا
هادئ	هادي
هادئة	هادية
هاذ	هاظا
هالو	مرحبا
[truncated: 156 more rows]

## Sheet: Sheet2
آخذكِ	أوديكي
آخر	ثاني
آخرين	ثانيات
آلة تهوية	مروحة
آلة كاتبة	طابعة
آيس كريم	بوزا
أؤجر	استأجر
أبحث	أدور
أبدل	أغير
أبقى	أظل
أبلغه	قله
أبنية	بنايات
أبواب	بواب
أبوابه	بوابه
أبيت	أبات
أبيض	أبيظ
أتجنب	اتوقى
أتحدث	أحكي
أتحقق	اتأكد
أتذكر	بتذكر
أتذوق	أذوق
أترجل	أنزل
أرسله	وديه
أرشح	برشح
أرشدتني	ادلني
أرضية	أرض
أرعاه	أربيه
أرغب	بدي
أرقت	كبيت
أركنها	أصفها
أرن	أرن
أرني	فرجيني
أرى	أشوف
أريتني	تفرجيني
أريد	بدي
أريك	أورجيك
أزرار	كبسات
أزرق	إزرق
أزكي	بنصح
أزور	أروح
أزيل	أشيل
أساسي	أصلي
أساسية	ضرورية
أساعدك	أخدمك
أستاذ	إستاذ
أستاذة	آنسة
أستبدل	أصرف
أستدعيك	أناديك
أسترخي	اتمدد
أستطع	قدرت
أستطيع	بقدر
أستعيد	آخذ
أستعير	استقرض
أستقل	اركب
أستقلها	اركبها
أستمع	أسمع
أسرة	عيلة
إحراق	حرق
إحضار	جيب
إحمر	أحمر
إخبارك	احكيلك
إدارة	لف
إدراج	انحسبت
إدعاء	دعوة
إذاً	لعاد
إذن	لعاد
إرشادات	تعليمات
إسطوانات مدمجة	سيديات
إصدار	طبع
إضاءة	إظاءة
إضافي	زيادة
إضافية	ثانية
إعطني	أعطيني
إعياء	تعب
إفطار	فطور
إلا	غير
إلهي	ربي
إلى	عال
إلى جانب	غير
إلى هذا الحد	لهالدرجة
إما	يا
إنجلترا	إنقلترا
إنجليزية	إنجليزي
اجرة	أجار
اجعل	خلي
اجلس	اقعد
اجمع	جمع
احترس	انتبه
احتساء	شرب
احتفظ	خلي
احتياجات	أشياء
احدعش	نوفمبر
احذية	كنادر
احصل	اوخذ
احضر	أجيب
احفظ	خلي
احمل	شيل
اختبار	امتحان
اختر	إختار
اختيارات	خيارات
اخلع	إشلح
ادخر	احتفظ
ادخل	أفوت
اذهب	روح
ارتداء	لبس
ارتطم	خبط
ارتفاع	علي
ارتفع	زاد
ارشح	بنصح
ارغب	بدي
اريد	بدي
ازدحام	زحمة
استئصال	شيل
استحمام	حمام
استخدام	تشغيل
استخدم	استعمل
استخدمها	إستعملها
استدر	لف
استدع	جيب
استدعي	اطلب
استرحت	ارتحت
استرداد	أرجع
استطلع	أتفرج
استعدت صحتي	طبت
استعيد	ارجّع
استغراقك	أخذت
استقطاع	أستلف
استقل	اركب
استلق	اتمدد
تتحقق	تتأكد
تتدلى	تنزل
تتسع	توسع
تتطلع	متحمس
تتفضل	تتكرم
تتقاضى	بتوخذ
تتلق	اخذت
تتلقاها	توصلك
تتلقى	تستقبل
تتم	بتصير
تتمتع	تستمتع
تتناول	توكل
تتهجي	بتنلفظ
تتوقف	توقف
تتيقن	تتأكد
تثملني	يسكرني
تثير	بتخليني
تجد	تلاقي
تجده	تلاقيه
تجري	تعمل
تجعل	بتخلي
تجلب	تجيب
تجهيز	جهزتوا
تجولت	طشيت
تحب	بتحب
تحتاج	بدك
تحتسي	تشرب
تحتفظ	تخبي
تحتفظوا	تخلو
تحدث	احكي
تحدثت	تسوبف
تحصل	توخذ
تحضر	تجيب
تحضر لي	تجيبلي
تحقق	اتأكد
تحققت	تأكدت
تحلق	بطير
تحملت	تورطت
تحويل	دوار
تحية	ترحيب
تخبرنا	تحكيلنا
تخبرني	تحكيلي
تختار	تنقي
تخرج	تطلع
تخص	خصيت
تخطر	تبلغ
تخطط	تنوي
تخفض	تنزل
تخفض سعرها	ترخصها
تخفيضات	خصومات
تخلص	كب
تخلع	تقلع
تدلني	ادلني
تدون	تكتب
تذكرة	وصفة
تذكرتان	تذكرتين
حينئذ	بهالوقت
حينما	لما
خادم	عامل
خادمة	خدامة
خارج	برا
خاص	تاع
خاص بالنساء	ستاتي
خاصة	مميزة
خاطئ	غلط
خاطف	حرامي
خافت	باهت
خال	خالي
خالية	فاظية
خام	أساسية
خامس	خمسة
خامس عشر	خمسطعش
خامسة	خمسة
خبرني	قلي
خدش	شخط
خذ	أخذ
خذني	أخذني
خذها	خظها
خرائط	خرايط
خرج	طلع
خزينة	صندوق
خصوصي	خاص
خصيصا	خصوصي
خضار	خظرة
خضراء	خضرا
جانب	جنب
جانبها	جمبها
جانبين	جهتين
جبن	جبنة
جدا	كثير
جرعة	مرة
جرى	ركظ
جزاء	جزا
جزار	لحام
جزيل	كل
جزيلا	كثير
جسم	حجم
جغرافيا	تظاريس
خفض	قلل
خفضها	تنزلها
خلاب	حلو
خلعت	شلحت
خلف	قفى
خمر	عرق
خمر أبيض	عرق
خمسة عشر	خمسطعش
خمسة عشر	خمسطعشر
دائم	عطول
دائما	دايما
داخل	جوا
داكن	غامق
دجاج	جاج
دخلت	فتت
دخوله	فوته
دراجات	بسكليتات
ذاك	هاذ
ذاهب	رايح
ذاهبة	رايحة
ذراع	إيد
ذلك	هاذ
ذهاب	روحة
ذهب	رحت
ذهبت	رحت
ذو	أبو
ذوقي	زوقي
ذوي	أصحاب
ذي	أبو
رأس	راس
رأسي	راسي
رأيت	شفت
رأيتها	شفتها
رأيك	رايك
رئيسي	عام
رائحة	ريحته
رائحته	ريحتة
رائع	بجنن
رائعة	روعة
رابع عشر	أربعطعش
زمن	مدة
زوج	جوز
زوجتك	مرتك
زوجتي	مرتي
زوجي	جوزي
س	رح
سائحين	سواح
سائر	ماشي
سائرون	ماشيين
سائق	سايق
سابع	سبعة
سابع عشر	سبعطعش
سابعة	سبعة
شوي	بعض
شيء	اشي
شيئاً	إشي
شيد	عمّر
شيق	حلو
شيقة	حلوة
شيك	شك
صائبة	صحيحة
صاخب	عالي
صباح	الصبح
صباحاً	الصبح
صبي	ولد
صلات	واسطات
صلة	علاقة
صناديق	علب
صندوق	طبون
صندوق السيارة	طبون
صنعها	عملها
صنعوا	سووا
صواب	مناسب
صياغة	صيغة
ضائعة	ضايغة
ضباط	ظباط
ضبط	ازبط
ضجيج	ضجة
ضخ	ظخ
عندما	بس
عندنا	عنا
عندي	علي
عنق	رقبة
عودة	أريد
عودوا	ارجعوا
عينان	عيون
عيناي	عيوني
غادر	طلع
غادرت	روحت
غامق	داكن
غثيان	لعية
غد	بكرا
غداء	غدا
في الخارج	برا
في الواقع	فعلاً
في تمام	بالظبط
في حالة	إذا
في حيرة	محتار
في غضون	خلال
فيلم	فلم
فيما	بشو
فيما بعد	بعدين
قادم	جاي
قادمة	جاية
قادمتان	جايات
قاعة	صالة
قاموا بها	عملوها
كيس	كمادة
كيف	شلون
كيف حالك	شلونك
كيمونو	كمونو
ل	حتى
لإحدى	لوحدة
لا	لأ
لا بد	اكيد
لا تزال	بعده
موسيقى	لحن
موضة	موظا
موضع	مكان
موضوعة	محطوطة
موعد	وقت
موقعي	مكاني
موقف	مجمع
ميدان	دوار
ميزانيتي	مصروفي
ميعاد	موعد
ميعادها	موعدها
ميناء	مينا
نأتي	نيجي
نأخذ	نوخظ
نأمل	متمنيين
نائم	نايم
ناحية	جهة
نادل	جرسون
ناصية	دخلة
نافذة	شباك
هناك	في
هواء	هوا
هيئة	شكل
هيا	يلا
واثق	متأكد
واحدة	وحدة
واسع	كبير
واسعة	وسيعة
واضح	واظح
واقع الأمر	صراحة
وامضة	ضاوية
وجبات	أكل
يذهب	بروح
يرعاه	يربيه
يرعى	يربي
يزداد	يزيد
يستحق	محرز
يستدع	يطلب
يستغرق	بده
يستمتع	ينبسط
يسرى	شمال
يسعني	بقدر
