# Supplementary material for: Exploring prompting for dialectical machine translation: a focus on north Jordanian Arabic
Source: PeerJ journal article supplement (doi:10.7717/peerj-cs.3209), 2025-11-12
Supplement: Code.zip [file MADAR_Corpus_26.xlsx]

## Sheet: Sheet1
sentID.BTEC	split	lang	sent	AD_old	AD_new	word 1	meaning 1	word 2	meaning 2	Foreign words	Has idioms
5	corpus-6-test-corpus-26-train	MSA	هناك ، أمام بيانات السائح تماما .	هيو هناك ، قدام بيانات السائح بالزبط .	هناك ، قدام بيانات السايح بالزبط .	أمام	قدام	تماما	بالزبط
9	corpus-6-test-corpus-26-train	MSA	لم اسمع بهذا العنوان من قبل بالقرب من هنا .	ما سمعت بهاد العنوان أبداً بالمنطقة هون .	ما سمعت بهاذ المكان قبل هيك بالمنطقة هون .	هنا	هون
11	corpus-6-test-corpus-26-train	MSA	استمر في السير في هذا الطريق حتى تجد صيدلية .	امشي دغري لعند ما تلاقي صيدلية .	كمل مشي بهاذ الطرق لعند ما تلاقي صيدلية .	استمر	كمل	سير	مشي
26	corpus-6-test-corpus-26-train	MSA	كم تكلفة الإفطار ؟	بقديش الفطور ؟	بقديش الفطور ؟	كم تكلفة	قديش
27	corpus-6-test-corpus-26-train	MSA	كيف أستطيع مساعدتك ؟	كيف بقدر اساعدك ؟	كيف بقدر اساعدك ؟	أستطيع	بقدر
30	corpus-6-test-corpus-26-train	MSA	اتجه يسارا عند الناصية الثالثة .	روح يسار من عند الدخلة الثالثة .	روح يسار من عند الدخلة الثالثة .	اتجه	روح	ناصية	دخلة
50	corpus-6-test-corpus-26-train	MSA	هل تحب أن تضع قشدة وسكر في قهوتك ؟	بتحب تحط كريمة و سكر مع قهوتك ؟	بتحب تحط كريمة و سكر مع قهوتك ؟	قشدة	كريمة	تضع	تحط
64	corpus-6-test-corpus-26-train	MSA	هل يمكنكم صرف الشيك ذو المائتي دولار الخاص بي ؟	بتقدر تصرفلي الشيك بميتين دولار ؟	بتقدروا تصرفولي الشيك أبو الميتين دولر تاعي؟	ذو	أبو	مائتي	ميتين
74	corpus-6-test-corpus-26-train	MSA	إذا حدث ذلك ، من فضلك أتصل بي .	اذا صار شي, لو سمحت رنلي .	اذا صار هيك ، لو سمحت رنلي .	اتصل	رن	ذلك	هيك
86	corpus-6-test-corpus-26-train	MSA	أين المقهى ؟	وين الكوفي شوب ؟	وين الكوفي شوب ؟	أين	وين			مقههى : كوفي شوب
87	corpus-6-test-corpus-26-train	MSA	أريد جاكيت للأطفال .	بدي جاكيت أطفال .	بدي جاكيت للصغار .	أطفال	صغار	أريد	بدي
91	corpus-6-test-corpus-26-train	MSA	حسنا . إنها تتكلف خمسة وثمانون دولارا في البريد العادي وثلاثة دولارات في التوصيل الخاص .	طيب. بتكلف ثمنية وخمسين دولار للبريد العادي وثلاثة دولار للتوصيل الخاص.	طيب. بتكلف خمسة وثمانين دولر بالبريد العادي وثلاث دولرات بالتوصيل الخاص.	حسنا	طيب	دولار	دولر
120	corpus-6-test-corpus-26-test	MSA	كنت سأشتري هذا إن كنت في مكانك ؟	انا كنت رح اشتريته لو كنت محلك .	كنت رح اشتريه لو كنت محلك .	مكانك	محلك
129	corpus-6-test-corpus-26-train	MSA	هل لديك أحذية حريمي عند أصابع القدم ؟	عندك كندرة رسمية واسعة من عند الأصابع؟	عندك كنادر ستاتي مفتوحة من عند الأصابع؟	حريمي	ستاتي	احذية	كنادر
130	corpus-6-test-corpus-26-train	MSA	هل ستواجهني أية صعوبات في الجمارك ؟	راح يكون عندي أي صعوبة في التعامل مع الجمارك؟	راح ألاقي أي صعوبة بالتعامل مع الجمارك؟	أواجه	ألاقي
140	corpus-6-test-corpus-26-train	MSA	لا ، هل لي أن أقترح أخذ غرفة ذات سريرين للاستخدام الفردي ؟ فنحن لدينا واحدة .	لا. ممكن أقترح عليك بدالها غرفة زوجية تستخدمها استخدام فردي. عنا وحدة.	لا. ممكن أقترح إني أوخذ غرفة بس لاستخدام فردي ؟ عنا وحدة.	لدينا	عنا	سريرين	تختين
143	corpus-6-test-corpus-26-train	MSA	أريد تمويج متقارب لشعري ، من فضلك .	أنا بدي التمويج يكون قريب من شعري، لو سمحت.	بدي أعمل شعري كيرلي ، لو سمحت.	من فضلك	لو سمحت			شعر مموج :كيرلي
145	corpus-6-test-corpus-26-train	MSA	هي تريد بيرة .	بدها خمرة.	هي بدها بيرا .	بيرة	بيرا
157	corpus-6-test-corpus-26-train	MSA	صباح الخير . كيف حالك .	صباح الخير. كيف حالك؟	صباح الخير . شلونك .	كيف حالك	شلونك
158	corpus-6-test-corpus-26-train	MSA	أسف أنني بحاجة إلى أن أطلع على أي مستند لتحديد الهوية .	أسف راح أحتاج أشوف اثبات هوية.	أسف أني بحاجة إني أشوف اثبات هوية.	أطلع	أشوف	مستند	إثبات
169	corpus-6-test-corpus-26-train	MSA	أي نوع من الملابس ؟	أيش نوع الملابس؟	أي نوع من الأواعي ؟	ملابس	أواعي
170	corpus-6-test-corpus-26-train	MSA	هذا بارد إلى حد ما . هل يمكن أن تقوم بتسخينه ؟	هاد بارد شوي. ممكن تسخنه؟	هاظا بارد شوي. ممكن تسخنه؟	غلى حد ما	شوي
173	corpus-6-test-corpus-26-test	MSA	أسف ، هذا المكان محجوز بالفعل .	آسف، هاد المكان محجوز.	آسف، هاذ المكان محجوز فعلاً.	بالفعل	فعلاً
176	corpus-6-test-corpus-26-train	MSA	أنا بحالة جدية ، لكن هل تمانع في الاتصال بصديق ؟	أنا تمام، بس ممكن أحكي مع صاحبي؟	أنا تمام، بس عندك مانع أرن عصاحبي؟	أتصل	أرن	بحالة جيدة	تمام
177	corpus-6-test-corpus-26-test	MSA	شكراً ، هذا يكفي .	شكراً، هيك بكفي.	شكراً ، هاظ بكفي.	هذا	هاظ
184	corpus-6-test-corpus-26-train	MSA	من هو أفضل صديق لك ؟	مين صاحبك المفضل؟	مين أحسن صاحب عندك ؟	أفضل	أحسن	صديق	صاحب
187	corpus-6-test-corpus-26-train	MSA	يوم الصحة الرياضية هو يوم العاشر من أكتوبر وهو إجازة قومية الغرض منها تحسين صحة المواطنين .	يوم الصحة والرياضة بعشرة أكتوبر بكون عطلة وطنية عملوه عشان يرفعوا مستوى الصحة عند الناس.	يوم الصحة الرياضية بعشرة عشرة بكون عطلة وطنية عملوه عشان يرفعوا مستوى الصحة عند الناس.	إجازة	عطلة	قومية	وطنية
192	corpus-6-test-corpus-26-train	MSA	هل تريد أن افحص موتور السيارة ؟	بدك اياني أشيك على ماتور السيارة؟	بدك ياني أفحص ماتور السيارة؟	موتور	ماتور
206	corpus-6-test-corpus-26-train	MSA	هل لك أن تساعدني في الوصول إلى حقيبتي ؟	ممكن تساعدني ألاقي شنتيتي؟	ممكن تساعدني ألاقي شنتيتي؟	حقيبتي	شنتيتي
221	corpus-6-test-corpus-26-train	MSA	هل ستقوم بعمل الترتيبات مقدماً ؟	بدك تعمل الترتيبات قبل؟	بدك تعمل الترتيبات قبل؟	تقوم	تعمل	مقدماً	قبل
238	corpus-6-test-corpus-26-train	MSA	تقدم إلىّ المساعدة ، شكراً لك .	بتساعدني، شكراً الك.	بتساعدني ، شكراً الك.
261	corpus-6-test-corpus-26-train	MSA	عندما تصل هناك أسأل شخص آخر ، من فضلك .	لما توصل هناك، اسأل حدا تاني، لو سمحت.	لما توصل هناك، اسأل حدا ثاني، لو سمحت.	شخص	حدا	تصل	توصل
280	corpus-6-test-corpus-26-train	MSA	أريد الامتداد أربع وعشرون ، من فضلك .	حابب أمدد يوم، لو سمحت.	حاب أمدد اربعة وعشرين، لو سمحت.	أريد	حاب
285	corpus-6-test-corpus-26-train	MSA	تفضل هذان دولاران . احتفظ بالباقي .	هي دولارين. خلي الباقي إلك.	تفظل هي دولرين. خلي الباقي إلك.	احتفظ	خلي	تفضل	تفظل
315	corpus-6-test-corpus-26-train	MSA	واحد هامبرجر وواحد شيز برجر ، من فضلك .	واحد همبرغر وواحد برجر بالجبنة، لو سمحت.	واحد همبرقر وواحد شيز برقر، لو سمحت.	برجر	برقر
319	corpus-6-test-corpus-26-train	MSA	كم تتقاضى لتطبيع صور الفيلم ؟	قديش بتاخد عشان تطبع صور الفيلم؟	قديش بتوخذ عشان تطبع صور الفلم؟	فيلم	فلم	تتقاضى	بتوخذ
320	corpus-6-test-corpus-26-train	MSA	كلا منا يريد أن يحاسب على وجبته .	احنا كل واحد بدو يدفع عن وجبته.	إحنا كل واحد بدو يدفع عن أكلته.	وجبته	أكلته
326	corpus-6-test-corpus-26-train	MSA	المكان كان على كرسي في البهو .	الموقع كان موجود على كرسي بالغرفة.	المكان كان عكرسي باللوبي.					البهو: لوبي
333	corpus-6-test-corpus-26-test	MSA	من فضلك غير هذه الينات إلى جنيهات .	لو سمحت اصرفلي هدول من ين لجنيهات.	لو سمحت اصرفلي هظول من ين لقنيه.	غير	اصرفلي	جنيه	قنيه
346	corpus-6-test-corpus-26-train	MSA	أريد قاموس جيب ، من فضلك .	بدي قاموس بحجم الجيبة، لو سمحت.	بدي قاموس بنحط بالجيبة ، لو سمحت.	جيب	جيبة	يوضع	بنحط
360	corpus-6-test-corpus-26-train	MSA	لشخصين عند الساعة السابعة , الاسم وتاناب .	لشخصين الساعة سبعة. الاسم واتاناب.	لشخصين الساعة سبعة. الاسم وتاناب.	سابعة	سبعة
368	corpus-6-test-corpus-26-train	MSA	ساعتي . كانت ساعة سيكو رقمية .	ساعتي. كانت رقمية من سيكو.	ساعتي. كانت الكترونية من سيكو.	رقمية	الكترونية
370	corpus-6-test-corpus-26-train	MSA	يسعدنا أن نقدم لك الشراب الذي تريده متبوعاً بالغداء . دليل كامل بالمشروبات التي نقدمها على رحلتنا موجودة في دليل المعلومات الخاص بمجلتنا .	راح نكون مبسوطين نقدملك الشراب اللي بتختاره، وبيلحقه العشا. منوفر قائمة كاملة من الشراب في هاي الرحلة موجودة بمجلة المعلومات التوجيهية تبعتنا.	بسعدنا إنه نقدملك العصير اللي بتختاره وبيلحقه الغدا . منوفر قائمة كاملة من الشراب في هاي الرحلة موجودة بقسم المعلومات تاع مجلتنا.	شراب	عصير	خاص	تاع
373	corpus-6-test-corpus-26-test	MSA	هل تعيش بالقرب من هنا ؟	انت عايش قريب من هون؟	انت عايش قريب من هون؟	تعيش	عايش
375	corpus-6-test-corpus-26-train	MSA	أين محل الهدايا ؟	وين محل الهدايا؟	وين محل الهدايا؟
386	corpus-6-test-corpus-26-test	MSA	أنا على الطريق الرئيسي بجانب خليج موروا .	أنا بالشارع الرئيسي بحد خليج موروا.	أني عالطريق العام بجنب خليج موروا.	رئيسي	عام	أنا	أني
391	corpus-6-test-corpus-26-train	MSA	أريد منبه ، من فضلك .	بدي ساعة منبه، لو سمحت.	بدي منبه، لو سمحت.
398	corpus-6-test-corpus-26-dev	MSA	بالمناسبة ، اسمي هيروش إيجيما .	بالمناسبة، اسمي هيروشي ايجيما.	بالمناسبة، اسمي هيروشي ايجيما.
401	corpus-6-test-corpus-26-dev	MSA	هذا القطار يتوقف في لاك فورست , أليس كذلك ؟	هاد القطار بوقف عند بحيرة الغابة. مش هيك؟	هاذ القطار بوقف عند بحيرة الغابة. مش هيك؟	أليس	مش	يتوقف	بوقف
ه	corpus-6-test-corpus-26-train	MSA	معظم اليابانيين يأكلون الأخطبوط والحبار .	أغلب اليبانيين بكلو الأخطبوط والحبار.	أغلب اليبانيين بوكلوا الخطبوط والحبار .	معظم	أغلب	يأكلون	بوكلوا
416	corpus-6-test-corpus-26-train	MSA	هل يمكنني الحصول على تذكرتين درجة ثانية لشيكاغوا , من فضلك ؟	ممكن أحجز تذكرتين لتشيكاغو من الدرجة التانية، لو سمحت؟	ممكن أحجز تذكرتين لشيكاغو من الدرجة الثانية، لو سمحت؟	هل يمكنني	ممكن
419	corpus-6-test-corpus-26-train	MSA	لقد ذهبت إلى نيويورك .	أنا رحت على نيويورك.	أني رحت على نيويورك.	ذهبت	رحت
423	corpus-6-test-corpus-26-train	MSA	ما هو رقم الرحلة الجوية ؟	شو رقم رحلة الطيران؟	شو رقم رحلة الطيران؟	ما	شو
442	corpus-6-test-corpus-26-test	MSA	واحد لنيويورك ، من فضلك .	واحد لنيويورك، لو سمحت.	واحد لنيويورك، إذا سمحت.	من فضلك	إذا سمحت
446	corpus-6-test-corpus-26-train	MSA	لعدة أيام قليلة .	حوالي كم يوم.	لكم يوم بس.	عدة	كم
447	corpus-6-test-corpus-26-train	MSA	الثاني من على اليسار .	التاني على الشمال.	الثاني عالشمال .	على	ع
471	corpus-6-test-corpus-26-dev	MSA	هذا الكارت , حسناً ؟	هاي البطاقة، طيب؟	هاذ الكرت ، طيب؟	كارت	كرت
488	corpus-6-test-corpus-26-train	MSA	هل هذا مكتب الاستقبال ؟ هل يوجد عيادة قريبة ؟	هاد مكتب الاستقبال؟ في عيادة قريبة من هون؟	هاظ مكتب الاستقبال؟ في عيادة قريبة من هون؟	يوجد	في
493	corpus-6-test-corpus-26-train	MSA	هل عشرة دولارات ستكون كافية للذهب بالتاكسي ؟	بكفو عشرة دولار للتكسي؟	بكفي عشر دولرات للروحة بالتكسي؟	ذهاب	روحة	تاكسي	تكسي
503	corpus-6-test-corpus-26-train	MSA	أنه ذو مذاق غريب .	طعمه غريب.	طعمه غريب.	مذاقه	طعمه
512	corpus-6-test-corpus-26-train	MSA	نعم . انتظر , سوف احضر لك واحدة .	طيب. استنى، راح أجبلك وحدة.	طيب. استنى، راح أجيبلك وحدة.	أحضر	أجيب	انتظر	استنى
516	corpus-6-test-corpus-26-train	MSA	نصف زجاجة , من فضلك .	نص عبوة، لو سمحت.	نص قنينة ، لو سمحت.	نصف	نص	زجاجة	قنينة
540	corpus-6-test-corpus-26-train	MSA	ليس تماماً . فقط شيء ما غير غالي الثمن .	مش هيك. بس اشي مش غالي.	مش هيك. بس إشي مش غالي.	غير	مش	شيء	إشي
548	corpus-6-test-corpus-26-train	MSA	هل تبحث عن شيء ما ؟	انت بتدور على اشي؟	إنت بدّور على اشي؟	تبحث	بدّور
551	corpus-6-test-corpus-26-train	MSA	أربع ليالي .	أربع ليالي.	أربع ليالي.
553	corpus-6-test-corpus-26-train	MSA	أريد بعض الجوارب الرجالي .	بدي شوية جرابات رجالي.	بدي شوية جرابات رجالي.	جوارب	جرابات
565	corpus-6-test-corpus-26-train	MSA	هل تستطيع أن تخفض سعرها لوجود بعض البقع بها ؟	بتقدر ترخصلي اياه لأنه في عليها شوية بقع؟	بتقدر ترخصها لأنه في عليها شوية بقع؟	تخفض سعرها	ترخصها
571	corpus-6-test-corpus-26-train	MSA	ارتطم بي شخص وبعد ذلك اكتشفت أن محفظتي قد سرقت .	في حدا خبط في . وبعدها لاحظت أنه جزداني انسرق.	في حدا خبط فيّ . وبعدها لاحظت أنه جزداني انسرق.	ارتطم	خبط	محفظتي	جزداني
599	corpus-6-test-corpus-26-train	MSA	أنا غير متأكد إذا كنت قد حزمت ملابس كافية لرحلة مدتها ثلاثة أيام .	أنا مش متأكد اذا جهزت اواعي بتكفيني لرحلة مدتها ثلاث أيام.	أنا مش متأكد اذا جهزت وعية بتكفيني لرحلة مدتها ثلاث أيام.	حزمت	جهزت	ملابس	وعية
612	corpus-6-test-corpus-26-train	MSA	حسناً ، أود أن أجرب النبيذ الأبيض .	طيب، انا بدي اجرب الخمر الأبيض.	طيب، انا بدي أجرب العرق .	نبيذ	عرق
631	corpus-6-test-corpus-26-train	MSA	إذا سأل أحد عني فأخبره بأني سوف أكون بالمقهى .	اذا أي حد سأل عني، قوللهم اني راح أكون بالكوفي شوب.	اذا حدا سأل عني، قله اني رح أكون بالكوفي شوب.	أخبره	قله			مقهى: كوفي شوب
632	corpus-6-test-corpus-26-train	MSA	أنا متأكد أني وضعتها بالجيب الداخلي للمعطف .	أنا متأكد انه حطيتها بالجيبة جوا كبوتي.	أنا متأكد انه حطيتها بالجيبة الداخلية للكبوت.	وضعتها	حطيتها	معطف	كبوت
641	corpus-6-test-corpus-26-test	MSA	هل يمكن أن تخبرني باسم ورقم الطرف الذي تريد الاتصال به ؟	ممكن تعطيني الاسم والرقم للجهة اللي بدك تتصل فيها؟	ممكن تعطيني اسم ورقم الجهة اللي بدك تتصل فيها؟	طرف	جهة	تريد	بدك
643	corpus-6-test-corpus-26-train	MSA	هل ستدفع لي شركة الطيران لشراء بعض الاحتياجات الشخصية الأساسية ؟	راح تدفعلي شركة الطيران عشان أشتري شوية أشياء من الضروريات الشخصية الأساسية؟	رح تدفعلي شركة الطيران عشان أشتري شوية أشياء شخصية ضرورية؟	أساسية	ضرورية	احتياجات	أشياء
650	corpus-6-test-corpus-26-train	MSA	أرغب في غرفة بحمام .	بدي غرفة مع حمام.	بدي غرفة بحمام.	ارغب	بدي
652	corpus-6-test-corpus-26-dev	MSA	لم يخرج من الماكينة شيء .	ما طلع أي انتاج من الآلة .	ما طلع من الماكينة إشي.	لم	ما	يخرج	طلع
667	corpus-6-test-corpus-26-test	MSA	كان يفترض أن تسافر على الطائرة رقم ثمانية اثنان صفر التي أقلعت منذ خمس عشرة دقيقة . حسنا . بإمكاني تنظيم رحلة أخرى .	انت كان المفروض تطلع برحلة الطيران رقم ثمانمية وعشرين، اللي أقلعت من خمسطعشر دقيقة. على العموم. أنا بقدر أرتبلك رحلة ثانية.	كان المفروض تسافر بالطيارة رقم ثمنية عشرين ، اللي طلعت من خمسطعشر دقيقة. على العموم. أني بقدر أرتبلك رحلة ثانية.	طائرة	طيارة	أنظم	أرتب
673	corpus-6-test-corpus-26-train	MSA	شخص ما فتح الطرد الخاص بي .	في حد فتح الطرد البريدي تبعي.	في حد فتح الطرد تبعي.	الخاص بي	تبعي	شخص	حد
679	corpus-6-test-corpus-26-test	MSA	آوه , الأمر بسيط ، هل أنت هنا ، على أية حال .	أووه، ولا اشي. انت هون، على كل حال.	أووه، شغلة بسيطة. انت هون، على كل حال.	أمر	شغلة	أي	كل
680	corpus-6-test-corpus-26-train	MSA	شركة الخطوط الجوية اليابانية ، طائرة رقم واحد اثنان ثلاثة .	الخطوط الجوية اليابانية، رحلة الطيران رقم واحد اثنين ثلاثة.	شركة الخطوط الجوية اليابانية، رحلة الطيران رقم واحد اثنين ثلاثة.	اثنان	اثنين
681	corpus-6-test-corpus-26-train	MSA	أرغب في شراء شامبو .	أنا بدي أشتري شامبو.	أنا بدي أشتري شامبو.	أرغب	بدي
683	corpus-6-test-corpus-26-train	MSA	هل بإمكانك أن تخبرني متى نصل إلى مجمع الخدمات العامة .	بتقدر تحكيلي متى راح نوصل على مجمع الخدمات العامة .	بتقدر تحكيلي أميت رح نوصل على مجمع الخدمات العامة .	متى	أميت
688	corpus-6-test-corpus-26-train	MSA	ـ أين أقرب محل جزارة ؟	وين أقرب لحام؟	وين أقرب لحام؟	جزار	لحام
703	corpus-6-test-corpus-26-train	MSA	نرغب في أن نقيم أربع ليالي بدءاً من أول أغسطس .	احنا حابيين نضل أربع ليالي من واحد أغسطس.	إحنا حابين نظل أربع ليالي من واحد ثمنية.	نقيم	نظل	نرغب	حابين
708	corpus-6-test-corpus-26-train	MSA	ما اسم هذه الوردة ؟	شو اسم هاي الوردة؟	شو اسم هاي الوردة؟	هذه	هاي
719	corpus-6-test-corpus-26-train	MSA	الخامس عشر من سبتمبر يوم احترام المسنين .	خمسطعش سبتمبر هو يوم احترام المسنين.	خمسطعش تسعة هو يوم احترام المسنين.	خامس عشر	خمسطعش
723	corpus-6-test-corpus-26-train	MSA	ليس هناك صابون في حجرتي .	ما عندي صابون في الغرفة.	فيش صابون بغرفتي .	ليس هناك	فيش	حجرتي	غرفتي
741	corpus-6-test-corpus-26-dev	MSA	عندك أية شيء يمكن أن أتعاطه للطفح الجلدي ؟	في أي اشي ممكن أخده عشان هاد الطفح الجلدي؟	عندك أي اشي ممكن آخذه عشان هاذ الطفح الجلدي؟	أية	أي	أتعاطه	آخذه
742	corpus-6-test-corpus-26-train	MSA	هل يمكنك أن تغير الصياغة طبقاً لما قلته للتو ؟	بتقدر تغير الصياغة للي انت حكيته هسا؟	بتقدر تغير الصيغة مثل ما قلت هسا؟	صياغة	صيغة	طبق	مثل
761	corpus-6-test-corpus-26-test	MSA	كم ستستغرق لكي تطلب ؟	كم بدك وقت عشان تطلب؟	قديش بدك يعني عشان تطلب؟	لكي	عشان
773	corpus-6-test-corpus-26-train	MSA	لا أستطيع أن أفعل ذلك , لكني سوف أضعها في الحقيبة لك .	ما بقدر اعمل هيك , لكن رح احطها بالشنتة الك.	ما بقدر اعمل هيك , بس رح احطها بالشنتة الك .	أفعل	أعمل	بقدر	أستطيع
777	corpus-6-test-corpus-26-train	MSA	كم تستغرق حتى تصبح متاحة .	كم بدك حتى تصير فاضية	قديش بدها حتى تصير فاظية .	تصبح	تصير	متاحة	فاظية
786	corpus-6-test-corpus-26-train	MSA	أين الاستعلامات الرياضية ؟	وين الاستعلامات الرياضة؟	وين الاستعلامات الرياضة؟	أين	وين
787	corpus-6-test-corpus-26-train	MSA	هذا المقاس ، الذي تسميه المقاس العادي ، سوف تجده هنا .	هي المقاس ، اللي حكيت عنه المقاس العادي، راح تلاقيه هون .	هاذ الحجم ، اللي بتسميه حجم عادي، راح تلاقيه هون .	مقاس	حجم	تجد	تلاقي
793	corpus-6-test-corpus-26-test	MSA	أين ستنتهي الجولة ، ومتى ؟	وين راح تخلص الرحلة، و اميت؟	وين راح تخلص الرحلة، و أميت؟	تنتهي	تخلص	جولة	رحلة
848	corpus-6-test-corpus-26-train	MSA	من أي مكان يمكنني أن أغير القطار الذي يوصلني إلى إدنبره ؟	من وين بقدر أغير القطار عشان أوصل لادنبرة؟	منين بقدر أغير القطار اللي بوصلني لادنبرة؟	من أي مكان	منين
855	corpus-6-test-corpus-26-train	MSA	أود أن أضع ذلك في صندوق ودائع آمن .	أنا بدي أحط هاد في صندوق حفظ أمانات.	أني بدي أحط هاظ بصندوق أمانات يكون آمن.	ودائع	أمانات	إلى	ل
859	corpus-6-test-corpus-26-train	MSA	أين يمكنني تغير نقودي ؟	وين بقدر أصرف مصاريي؟	وين بقدر أصرف مصاريي؟	تغير	أصرف	نقود	مصاري
897	corpus-6-test-corpus-26-train	MSA	هل يمكننا ترك أشياءنا ما عدا الأشياء القيمة في الحافلة ؟	بنقدر نخلي أغراضنا، إلا الأشياء الغالية، في الباص؟	بنقدر نخلي اغراضنا هون، ماعيدا الأشياء الغالية، في الباص؟	حافلة	باص	ما عدا	ماعيدا
902	corpus-6-test-corpus-26-train	MSA	أتساءل عن هذه الرسوم الزائدة على فاتورتي .	أنا مستغرب ليش كل هاد المصروف على فاتورتي.	أني مستغرب ليش كل هاي الرسوم الزيادة عفاتورتي.	أتساءل	مستغرب	زائدة	زيادة
917	corpus-6-test-corpus-26-train	MSA	أنا سوف أدفع خمسون دولاراً .	أنا راح أدفع خمسين دولار.	أناي رح أدفع خمسين دولر.	أنا	أني	دولر	دولار
941	corpus-6-test-corpus-26-train	MSA	الآن أعرف . ماذا كان الخطأ . ؟	هسا أنا عرفت شو اللي كان غلط.	هسا عرفت . شو اللي كان غلط . ؟	الآن	هسا	خطأ	غلط
957	corpus-6-test-corpus-26-dev	MSA	أكيدا التي تتحدث معك ، أنا عندي حجز مائدة في تمام الساعة السادسة والثلث هذا المساء . ولكني آسفة لأني سأصل متأخرة نصف ساعة .	انا ايكيدا يلي عم تحكي. عندي حجز لطاولة الساعة ستة و ثلث المساء. بس أنا آسف راح أوصل متأخرة نص ساعة.	أكيدا يلي بتحكي. عندي حجز طاولة عالساعة ستة و ثلث المسا. بس آسفة لإني رح أوصل متأخرة نص ساعة.	مائدة	طاولة	في تمام	ع
1003	corpus-6-test-corpus-26-train	MSA	كم أوقية من العطر أستطيع الحصول عليه من غير رسوم ؟	كم أوقية من العطر بقدر أخد معي بدون رسوم ؟	كم وقية من العطر بقدر أوخذها بدون رسوم ؟	من غير	بدون	حصول	أوخذ
1007	corpus-6-test-corpus-26-train	MSA	فقط سياحة .	بس للسياحة.	بس للسياحة.	فقط	بس
1010	corpus-6-test-corpus-26-train	MSA	هذا جيد , من فضلك وقع عليهم . كيف تريدها ؟	هيك تمام، لو سمحت وقعهم. كيف بتحبه يكون؟	هاذ تمام، لو سمحت وقعهم. كيف بتحبها تكون؟	جيد	تمام	تريدها	بتحبها
1023	corpus-6-test-corpus-26-test	MSA	هل لا زال لديكم مقاعد لعرض الليلة ؟	لسا في عندك مقاعد لعرض الليلة؟	ظل في عندكم محلات لعرض الليلة؟	لا زال	ظل	مقاعد	محلات
1036	corpus-6-test-corpus-26-train	MSA	أود الحصول على واحدة كبيرة .	أنا بدي وحدة كبيرة.	أني بدي وحدة كبيرة.	واحدة	وحدة
1037	corpus-6-test-corpus-26-dev	MSA	لقد نمت و لم أتيقظ حين رن منبه السادسة و النصف .	أنا نمت و ما صحيت على منبه الساعة ستة ونص.	نمت و ما صحيت ع منبه الساعة ستة ونص.	سادسة	ستة	أتيقظ	صحيت
1038	corpus-6-test-corpus-26-train	MSA	أنا مصور حر .	أنا مصور حر.	أني مصور حر.
1047	corpus-6-test-corpus-26-train	MSA	يستطيع الصرافون أن يغيروا دولاراتك من أجل بقشيش الكازينو . هل نذهب ؟	التجار ممكن يحولوا الدولارات لحيل الكازينو. لازم نروح؟	السمسارين بقدروا يصرفولك الدولرات عشان بخشيش الكازينو. بصير نروح؟	صرافون	سمسارين	بقشيش	بخشيش
1056	corpus-6-test-corpus-26-dev	MSA	لدينا نحو ثلاثون نوعاً من زيوت الاستحمام .	عنا حوالي ثلاثين نوع من زيوت الحمام.	عنا حوالي ثلاثين نوع من زيوت الحمام.	لدينا	عنا	استحمام	حمام
1062	corpus-6-test-corpus-26-train	MSA	سوف أحضر لك العرض الأسبوع القادم .	بدي اجهز الاقتراح الك الأسبوع الجاي.	بدي اجهزلك العرض الاسبوع الجاي.	القادم	الجاي
1074	corpus-6-test-corpus-26-train	MSA	شكراُ لك . كم تكلفة هذا القفاز ؟	شكراً الك. قديش سعر هاي الكفوف؟	شكراً الك. قديش سعر هاي الكفوف؟	قفاز	كفوف
1098	corpus-6-test-corpus-26-train	MSA	علىّ أن أذهب ، سأتصل بك لاحقاً .	أنا لازم أروح. راح أحكي معك بعدين.	أني لازم أروح. رح أحكي معك بعدين.	عليّ أن	لازم	لاحقاً	بعدين
1100	corpus-6-test-corpus-26-train	MSA	أريد بعض الحفاضات التى يمكن التخلص منها بعد الاستعمال .	بدي حفاضات للاستعمال مرة وحدة.	بدي حفاظات للاستعمال مرة وحدة.	حفاضات	حفاظات
1122	corpus-6-test-corpus-26-train	MSA	أين نشأت سمكات الفراش هذه ؟	من وين أصل نشأة سمكة الفراشة؟	من وين جاية سمكات الفراش هاي؟	نشأت	جاية
1124	corpus-6-test-corpus-26-train	MSA	هل لك أن تغيرهم إلى دولارات من فضلك ؟	ممكن تحولي اياهم لدولارات، لو سمحت؟	ممكن تحولي اياهم لدولارات، لو سمحت؟	تغير	تحول
1139	corpus-6-test-corpus-26-train	MSA	نحن محظوظون جداً . لديهم واحدة مقاس أربعة فى متجر ألامونا .	احنا كتير محظوظين. في عندهم واحد مقاسه أربعة في محل ألاموانا.	إحنا كثير محظوظين. في عندهم وحدة مقاسها أربعة بمحل ألاموانا.	متجر	محل	لديهم	عندهم
1146	corpus-6-test-corpus-26-train	MSA	هل هناك سيارة ليموزين ؟	في هون سيارة ليموزين؟	في سيارة ليموزين؟
1163	corpus-6-test-corpus-26-dev	MSA	هل لى أن أتلقى اتصالاً يوقظنى فى الخامسة و النصف من صباح الغد ؟	ممكن ترنلي مكالمة تصحيني فيها الساعة خمسة ونص بكرا الصبح؟	ممكن ترنلي مكالمة تصحيني فيها الساعة خمسة ونص بكرا الصبح؟	غد	بكرا	صباح	الصبح
1165	corpus-6-test-corpus-26-train	MSA	أُفضلُ حجرة هادئة .	أنا بحب غرفة هادية.	بفظل غرفة هادية.	هادئة	هادية	أفضل	بفظل
1167	corpus-6-test-corpus-26-train	MSA	أريد مزيلا لطلاء الأظافر .	بدي مزيل للمناكير.	بدي أسيتون للمناكير.	مزيل طلاء	أسيتون			منكاير: طلاء أظافر
1183	corpus-6-test-corpus-26-train	MSA	أريد بطارية .	بدي بطارية.	بدي بطارية.	أريد	بدي
1193	corpus-6-test-corpus-26-test	MSA	هل هناك فرقة موسيقية أم دي جي ؟	في هناك فرقة موسيقية لايف أو دي جيه؟	في فرقة موسيقية ولا ديجيه؟	دي جي	ديجيه
1194	corpus-6-test-corpus-26-train	MSA	هل أستطيع تأجير أداة للتنفس أثناء السباحة ؟	بقدر أستأجر قطعة التنفس خلال السباحة؟	بقدر أستأجر شغلة للتنفس خلال السباحة؟	أداة	شغلة	اثناء	خلال
1199	corpus-6-test-corpus-26-dev	MSA	أود حجز غرفة لأربع ليالى ابتداء من الثانى و العشرين من ديسمبر .	أنا بدي أحجز غرفة لمدة أربع ليالي من اتنين وعشرين من ديسمبر.	أنا بدي أحجز غرفة لمدة أربع ليالي من اثنين وعشرين إثنعش.	ديسمبر	إثنعش
1212	corpus-6-test-corpus-26-train	MSA	هل هذه الحقيبة مناسبة لكل حالات الطقس ؟	هاي الشنطة بتناسب الجو بكل أحواله؟	هاي الشنتة بتناسب كل حالات الجو؟	الطقس	الجو
1213	corpus-6-test-corpus-26-train	MSA	أريد كعكة محلاة من فضلك .	بدي دونت، لو سمحت.	بدي كوكيز لو سمحت.					كعكة محلاة:كوكيز
1218	corpus-6-test-corpus-26-train	MSA	أريد تأجير سلاح آلى لمدة يومين .	بدي استأجر سلاح أوتوماتيك ليومين.	بدي استأجر سلاح أوتوماتيك ليومين.					آلي: أوتوماتيك
1224	corpus-6-test-corpus-26-train	MSA	لم أدرك الرحلة رقم عشرون المتجهة إلى سان فرانسيسكو .	أنا راحت على رحلة الطيران عشرين لسان فرانسيسكو.	ما لحقت الرحلة رقم عشرين اللي رايحة عسان فرانسيسكو.	أدرك	لحقت	متجهة	رايحة
1234	corpus-6-test-corpus-26-train	MSA	كم سأدفع للوصول إلى المطار ؟	قديش بكلف الوصول للمطار؟	قديش رح أدفع حتى اوصل للمطار؟	ل	حتى
1235	corpus-6-test-corpus-26-train	MSA	هذا جيد . متى هو ؟	هيك تمام. متى راح يكون؟	هيك تمام. متى رح يكون؟	جيد	تمام
1276	corpus-6-test-corpus-26-train	MSA	كم عمر ابنتك ؟	قديش عمر بنتك؟	قديش عمر بنتك؟	كم	قديش
1312	corpus-6-test-corpus-26-train	MSA	هل يمكن أن تدلني على بعض الفنادق الرخيصة والنظيفة ؟	ممكن تحكيلي عن بعض الفنادق الرخيصة والنظيفة؟	بصير ادلني عبعض الفنادق الرخيصة والنظيفة؟	هل يمكن	بصير	تدلني	ادلني
1321	corpus-6-test-corpus-26-train	MSA	يمكننا ان نحجز لك غرفة مريحة في قلعة قديمة بالقرب من نادي جولف شهير .	بنقدر نحجزلك غرفة مريحة في قصر قديم قريب من نادي جولف المشهور.	بنقدر نحجزلك غرفة مريحة بقلعة قديمة قريبة من نادي جولف مشهور.	شهير	مشهور
1329	corpus-6-test-corpus-26-train	MSA	ارشح ذلك لأنه مائة في المائة مصنوع من مكونات طبيعية .	أنا بنصحك بهاد لأنه مصنوع من مواد طبيعية مية بالمية.	أني بنصحك بهاذ لأنه مصنوع من مواد طبيعية مية بالمية.	ارشح	بنصح	مائة	مية
1361	corpus-6-test-corpus-26-dev	MSA	هل يتوقف القطار في برايتون ؟	بوقف القطار عند برايتون؟	بوقف القطار عند برايتون؟	في	عند
1369	corpus-6-test-corpus-26-train	MSA	هل من الممكن أن تخبرني أين أستطيع أن أحصل على تاكسي ؟	بتقدر تحكيلي من وين بلاقي تكسي؟	بتقدر تحكيلي من وين بلاقي تكسي؟	أحصل على	بلاقي	هل من الممكن	بتقدر
1375	corpus-6-test-corpus-26-train	MSA	تذكرتين درجة ثانية من فضلك .	بطاقتين من الدرجة الثانية، لو سمحت.	تذكرتين من الدرجة الثانية لو سمحت.
1384	corpus-6-test-corpus-26-train	MSA	أود أن أرسل فاكس .	أنا بدي أبعث فاكس.	بدي أبعث فاكس.	أرسل	أبعث
1394	corpus-6-test-corpus-26-train	MSA	أريد مكواة سفر .	بدي مكواية للسفر.	بدي مكوى للسفر.	مكواة	مكوى
1396	corpus-6-test-corpus-26-train	MSA	أيمكنني أن أقدم لك أي شيء ؟	بقدر أجبلك أي اشي؟	بقدر أضيفك أي اشي؟	أقدم	أضيف
1404	corpus-6-test-corpus-26-train	MSA	أخشى أن أسأل ، لكن ماذا تعني ؟	بخاف اسأل، بس شو قصدك؟	بخاف اسأل، بس شو قصدك؟	أخشى	بخاف	تعني	قصدك
1418	corpus-6-test-corpus-26-train	MSA	أريد الشخص الذي يعد وثائق عادية في حجم ورقة الخطاب بدون الحاجة إلى طيهم .	بدي واحد بيقدر يعمل الوثائق اللي بحجم الورق العادي بدون ما يثنيهم.	بدي الشخص اللي بعمل الوثائق اللي بحجم الورق العادي بدون ما يظطر يثنيهم.	يعد	بعمل	يحتاج	يظطر
1433	corpus-6-test-corpus-26-test	MSA	نعم ، لكن ليس قويا جدا .	اه، بس مش كتير قوي.	اه ، بس مش قوي كثير.	نعم	اه	جدا	كثير
1434	corpus-6-test-corpus-26-train	MSA	أنا شديد الحساسية للقطط .	أنا عندي حساسية قوية من البسس.	أني بتحسس كثير من البسس.	قطط	بسس	شديد	كثير
1436	corpus-6-test-corpus-26-train	MSA	نعم , لا بد أن يكون عندك رخصة قيادة ، ولا بد أن تحصل على رخصة من لجنة التاكسي والليموزين .	اه، لازم يكون عندك رخصة سواقة، ولازم يكون عندك رخصة من لجنة التاكسي و ليموزين.	اه، لازم يكون عندك رخصة سواقة، ولازم يكون توخذ رخصة من لجنة التكسي و ليموزين.	لا بد	لازم	قيادة	سواقة
1462	corpus-6-test-corpus-26-train	MSA	استمر يا سيدي .	كمل يا أستاذ.	كمل يا سيدي .	استمر	كمل
1465	corpus-6-test-corpus-26-test	MSA	يبدوا أنني غير قادر على الحصول على الماء الساخن .	شكله مش قادرأحصل على الماء الساخن .	شكله مش قادر يجيب ميّة ساخنة.	ماء	ميّة	يبدو	شكله
1474	corpus-6-test-corpus-26-train	MSA	أود أن أحجز غرفة لهذه الليلة .	أنا بدي أحجز غرفة لهاي الليلة.	بدي أحجز غرفة لهاي الليلة.	هذه	هاي
1492	corpus-6-test-corpus-26-train	MSA	لا ، إنها لا تشمل الضريبة ومصاريف الخدمة .	لا، هي ما بتتضمن الضريبة وقيمة الخدمة.	لا، هي ما بتشمل الضريبة ومصاريف الخدمة.	لا	ما	إنها	هي
1506	corpus-6-test-corpus-26-train	MSA	هل تريد أن تذهب للتسوق معي بعد الظهر ؟	بتحب تيجي معي للتسوق بعد الظهر؟	بتحب تيجي معي نتسوق بعد الظهر؟	تذهب	تيجي
1508	corpus-6-test-corpus-26-test	MSA	هيه ، هذا فستان جميل حقا .	مرحبا، هاد فعلا فستان حلو.	مرحبا ، هاذا فعلا فسطان حلو.	فستان	فسطان	حقا	فعلا
1519	corpus-6-test-corpus-26-train	MSA	الآن ، مكالمتك ردت . تفضل من فضلك .	حاليا، مكالمتك رجعت. تفضل لو سمحت.	حاليا، مكالمتك رجعت. تفضل لو سمحت.	ردت	رجعت	الآن	حاليا
1525	corpus-6-test-corpus-26-train	MSA	ما رقم البوابة ؟	قديش رقم البوابة؟	شو رقم البوابة؟	ما	شو
1539	corpus-6-test-corpus-26-train	MSA	ما التذكار الخاص بهاواي ؟	شو هو التذكار الخاص بهاواي؟	شو هو التذكار الخاص بهاواي؟
1556	corpus-6-test-corpus-26-train	MSA	أيمكنني أن أذهب هناك بمترو الأنفاق ؟	بقدر أروح هناك من خلال القطار؟	بقدر أروح هناك بالمترو؟
1560	corpus-6-test-corpus-26-train	MSA	أريد مجفف .	بدي مجفف.	بدي سشوار.					مجفف :سشوار
1562	corpus-6-test-corpus-26-train	MSA	هل نذهب إلى أي مكان متحدثين مثل ذلك ؟	راح نضل نحكي هيك وين ما نروح؟	راح نظل نحكي هيك وين ما نروح؟	مثل	هيك
1585	corpus-6-test-corpus-26-train	MSA	أنا من النرويج .	أنا من النرويج.	أني من النرويج.
1603	corpus-6-test-corpus-26-dev	MSA	من ثمانية إلى اثنى عشر من فضلك .	من ثمانية ل ثنعش لو سمحت.	من ثمانية ل اثنعش لو سمحت.	اثني عشر	اثنعش
1619	corpus-6-test-corpus-26-train	MSA	بالتأكيد . دعني أراها . أظن أن المرجان جرحك .	أكيد. خليني أشوف. بتوقع انت انجرحت من المرجان.	أكيد. خليني أشوفها . بظن المرجان جرحك.	دعني	خليني	أراها	أشوفها
1620	corpus-6-test-corpus-26-train	MSA	لقط للتأكيد ، إعطني رقم المسئول .	بس للاحتياط، أعطيني رقم الشخص المسؤول.	بس للاحتياط، أعطيني رقم الشخص المسؤول.	إعطني	أعطيني	فقط	بس
1622	corpus-6-test-corpus-26-train	MSA	هل هناك طريق حر ؟	في طريق سريع؟	في طريق فرعي؟	هل هناك	في
1630	corpus-6-test-corpus-26-train	MSA	لماذا لم يأت إلى الحفلة أمس ؟	ليش ما اجى على الحفلة مبارح؟	ليش ما اجى على الحفلة امبارح؟	أمس	امبارح	يأت	إجى
1637	corpus-6-test-corpus-26-train	MSA	لقد كان هناك حادث مرور .	كان في حادث سير.	كان في حادث سير.	مرور	سير
1650	corpus-6-test-corpus-26-train	MSA	آسف , لقد اتصلت بالرقم الخطأ .	آسف، أنا رنيت للرقم الغلط.	آسف، أني اتصلت بالرقم الغلط.
1653	corpus-6-test-corpus-26-test	MSA	من فضلك ادخل رقم هويتك الشخصية .	لو سمحت دخل رقم هويتك .	لو سمحت دخّل رقم هويتك .	ادخل	دخّل
1663	corpus-6-test-corpus-26-dev	MSA	لا أستطيع ضبط اللوحة .	مش قادر أغير الصورة.	مش قادر أزبط الصورة.	ضبط	ازبط
1668	corpus-6-test-corpus-26-train	MSA	واحد هامبورجر بالجبن و عصير برتقال , من فضلك .	واحد برجر بالجبنة وعصير برتقال، لو سمحت.	واحد تشيز برقر وعصير بردقان ، لو سمحت.	برتقال	بردقان			هامبورجر بالجبن: تشيز برقر
1670	corpus-6-test-corpus-26-test	MSA	هاك جواز سفري .	خذ جواز سفري.	هاك جواز السفر تاعي.	خذ	هاك
1682	corpus-6-test-corpus-26-test	MSA	لماذا , شكرا جزيلا . هل أستطيع الارتقاء للقمة ؟	ليش، شكراً كتير الك. بقدر ارتقي فوق على القمة؟	ليش، شكراً كثير الك. بقدر اطلع للقمة؟	أرتقي	أطلع	جزيلا	كثير
1702	corpus-6-test-corpus-26-train	MSA	هل أستطيع أن الحصول علي تذكرتان للمسرحية الغنائية الجمعة القادمة .	بقدر أحجز تذكرتين للحفلة الموسيقية الجمعة الجاي؟	بقدر أوخذ تذكرتين للحفلة الموسيقية الجمعة الجاي؟	مسرحية	حفلة
1718	corpus-6-test-corpus-26-train	MSA	راكب آخر هناك قال انهم يستطيعون أن يبدلوا مقاعدهم معك .	في مسافر ثاني هناك حكى انه بقدروا يبدلوا الكراسي معك.	في راكب ثاني هناك قال انه بقدروا يبدلوا الكراسي معك.	مقاعد	كراسي	آخر	ثاني
1754	corpus-6-test-corpus-26-train	MSA	هل أستطيع تمديد إقامتي ؟	بقدر أمدد اقامتي؟	بقدر أمدد إقامتي؟
1766	corpus-6-test-corpus-26-train	MSA	يا صاح , أتعرف أي مكان يستحق الرؤية قريبا من هنا ؟	اخوي، بتعرف أي مكان بستحق الشوفة قريب من هون؟	أخوي، بتعرف أي مكان محرز الشوفة قريب من هون؟	يستحق	محرز	يا صاح	أخوي
1768	corpus-6-test-corpus-26-dev	MSA	لا , أريد أن استأجر نصف مجموعة من المضارب وزوجا من الأحذية .	لا، أنا بدي استأجر نص مجموعة من المضارب بوط.	لا، بدي استأجر نص مجموعة من المضارب وجوز بواط.	أحذية	بواط	زوج	جوز
1782	corpus-6-test-corpus-26-train	MSA	هل من الممكن أن تخبرني عندما تعثروا علي الحقيبة الضائعة ؟	ممكن تخبرني بس تلاقوا الشنتة الضايعة؟	ممكن تخبرني بس تلاقوا الشنتة الضايعة؟	ضائعة	ضايغة	تعثروا	تلاقوا
1788	corpus-6-test-corpus-26-train	MSA	ما اسم هذه المحمية ؟	شو اسم هاي المحمية؟	شو اسم هاي المحمية؟
1791	corpus-6-test-corpus-26-train	MSA	أصبت بسحجة .	أنا انخدشت.	أني انشخطت.	سحجة	شخط
1792	corpus-6-test-corpus-26-dev	MSA	أين يوجد مكان جيد به لمشاهدة الأماكن المهمة ؟	وين في مكان منيح لنشوف الاماكن المهمة؟	وين في مكان كويس حتى نشوف الاماكن المهمة؟	جيد	كويس
1800	corpus-6-test-corpus-26-train	MSA	هل من الممكن أن احصل علي بعض الفاكهة ؟	ممكن تجيبلي شوية فواكة؟	ممكن تجيبلي شوية فواكة؟	فاكهة	فواكه	بعض	شوية
1834	corpus-6-test-corpus-26-train	MSA	هل أستطيع تناول غذائي الآن ؟	ممكن أتغدى هسا؟	ممكن أوكل هسا؟	أتناول	أوكل
1837	corpus-6-test-corpus-26-train	MSA	أريد أن أستبدل تلك الدولارات .	بدي أصرف هاي الدولارات.	بدي أصرف هاي الدولرات.	أستبدل	أصرف	تلك	هاي
1867	corpus-6-test-corpus-26-train	MSA	أحتاج إلى تاكسي . أنا في ساوث ماين ، وليبرتي .	بدي تاكسي. أنا في ساوث ماين، وليبرتي.	بدي تكسي. أني بساوث ماين ، وليبرتي.	أحتاج	بدي
1876	corpus-6-test-corpus-26-dev	MSA	بالتأكيد ، هل تريد تسريحة متموجة دائما ؟	أكيد، بدك اياه كيرلي دايما؟	أكيد، بدك اياه كيرلي دايما؟	بالتاكيد	أكيد	دائما	دايما
1878	corpus-6-test-corpus-26-train	MSA	هذه ليست تفاحة ولكنها خوخة .	هاي مش تفاحة هاي خوخة.	هاي مش تفاحة هاي خوخة.	ليست	مش
1903	corpus-6-test-corpus-26-train	MSA	سوف أعطيك روشتة . خذها إلى الصيدلية .	راح أعطيك وصفة طبية. خدها على الصيدلية.	راح أعطيك الوصفة . خظها عالصيدلية.	خذها	خظها	روشيتة	الوصفة
1927	corpus-6-test-corpus-26-train	MSA	نسافر جواً ثلاث مرات في الأسبوع ، أيام الثلاثاء والجمعة والسبت .	احنابنسافر ثلث أيام بالأسبوع، الثلاثاء، الجمعة والسبت.	بنسافر بالطيارة ثلث مرات بالأسبوع، الثلاثاء، الجمعة والسبت.	جواً	بالطيارة
1931	corpus-6-test-corpus-26-dev	MSA	هذا سعر مرتفع ، أليس كذلك ؟	هاد سعره غالي، صح؟	هاظا سعره غالي، صح؟	أليس كذلك	صح	مرتفع	غالي
1948	corpus-6-test-corpus-26-train	MSA	نعم لدينا هذا ، سوف نجهزها لك .	اه موجود عنا. راح نجهزلك اياه.	اه موجود عنا. رح نجهزلك اياه.	نعم	اه
1950	corpus-6-test-corpus-26-dev	MSA	هل يمكنكم إبقاء أمتعتي لديكم حتى الساعة الثالثة ؟	ممكن تخليلي شنتاتي للساعة ثلاثة؟	ممكن تخلولي شنتاتي عندك للساعة ثلاثة؟	أمتعتي	شنتاتي
1951	corpus-6-test-corpus-26-train	MSA	ل , ا أريد فقط الزيارة بدون ميعاد .	لا، أنا بس بدي ازوره بدون موعد.	لا، أني بس بدي ازوره بدون موعد.	ميعاد	موعد
1954	corpus-6-test-corpus-26-dev	MSA	هل يمكن أن أحجز سيارة للإيجار من هنا ؟	بقدر احجز سيارة للايجار هون؟	بقدر احجز سيارة للأجار هون؟	إيجار	أجار
1968	corpus-6-test-corpus-26-train	MSA	هل أنت أمريكي ؟	انت أمريكي؟	إنت أمريكي؟	أنت	إنت
1980	corpus-6-test-corpus-26-test	MSA	إلى هذا المكان , لو سمحت .	لهاد المكان، لو سمحت.	لهاظ المكان، لو سمحت.	هذا	هاظ
1985	corpus-6-test-corpus-26-train	MSA	لقد تعطلت سيارتي .	سيارتي خربانة.	خربت سيارتي .	تعطلت	خربت
1988	corpus-6-test-corpus-26-train	MSA	أين مظلل العيون ؟	وين ضل العيون؟	وين الآي شدو؟					مظلل العيون: آي شدو
1993	corpus-6-test-corpus-26-train	MSA	نريد ركناً هادئاً ، إن أمكن .	بدنا زاوية هادية، اذا ممكن.	بدنا زاوية هادية، اذا ممكن.	ركن	زاوية
1997	corpus-6-test-corpus-26-train	MSA	هل هذه السيارة الأجرة متاحة ؟	هاي التكسي فاضية؟	هاي التكسي فاضية؟	متاحة	فاضية
1998	corpus-6-test-corpus-26-train	MSA	هل هذه محطة قطار سريع ؟	هاي محطة اكسبريس؟	هاي محطة اكسبريس؟					قطار سريع :اكسبرس
2001	corpus-6-test-corpus-26-train	MSA	متى ينبغي أن آتي ؟	متى لازم آجي ؟	متى لازم آجي ؟	ينبغي	لازم	آتي	آجي
2003	corpus-6-test-corpus-26-train	MSA	أريد دورقاً صغيراً من الخمر الأبيض .	بدي قنينة صغيرة من النبيذ الأبيض.	بدي دورقة صغيرة من العرق.	دورقاً	دورقة	خمر أبيض	عرق
2005	corpus-6-test-corpus-26-train	MSA	آه . هل يمكنني الحصول على وجبتي فيما بعد ؟ أنا أشعر أنني لست على ما يرام الآن .	ممم. ممكن أخد وجبتي بعدين؟ حاسس حالي مش على بعضي هسا.	ممم. ممكن أخد وجبتي بعدين؟ حاسس حالي مش على بعضي هسا.	فيما بعد	بعدين
2025	corpus-6-test-corpus-26-train	MSA	بالفعل لدي أخبار . أنا سأتزوج .	فعلياً، عندي أخبار. أنا بدي اتزوج.	فعلياً، عندي أخبار. أنا بدي أجوز.	بالفعل	فعلياً	أتزوج	أجوز
2033	corpus-6-test-corpus-26-train	MSA	بنطلون أخر ؟	في بنطلون ثاني؟	بنطلون ثاني؟
2035	corpus-6-test-corpus-26-train	MSA	هل يمكنني الحصول على برنامج ؟	بقدر آخد برنامج؟	بقدر آخذ برنامج؟	أحصل	آخذ	هل يمكنني	بقدر
2052	corpus-6-test-corpus-26-train	MSA	اقتحمت غرفتي الليلة الماضية .	في حدا اقتحم غرفتي مبارح بالليل.	في حدا اقتحم غرفتي مبارح بالليل.	ماضية	مبارح
2055	corpus-6-test-corpus-26-train	MSA	أرني السمكة التي رأيتها اليوم في كتاب الصور ، من فضلك .	ورجيني السمكة اللي شفتها اليوم في البوم الصور، لو سمحت.	ورجيني السمكة اللي شفتها اليوم بألبوم الصور، لو سمحت.	رأيتها	شفتها	أرني	ورجيني	كتاب الصور: ألبوم
2083	corpus-6-test-corpus-26-train	MSA	انظر التعليمات على علبة الطعام الفارغة .	شوف الارشادات اللي على علبة الأكل الفاضية.	شوف التعليمات اللي على علبة الأكل الفاضية.	فارغة	فاضية	انظر	شوف
2086	corpus-6-test-corpus-26-train	MSA	أريد نقوداً ورقية .	بدي مصاري ورقية.	بدي مصاري ورق.	نقود	مصاري	ورقية	ورق
2100	corpus-6-test-corpus-26-test	MSA	خطف محفظتي وجرى بعيداً .	سرق جزداني وهرب بعيد.	سرق جزداني وركظ بعيد.	خطف	سرق	جرى	ركظ
2119	corpus-6-test-corpus-26-train	MSA	أليس لديك دروس تجريبية ؟	ما أخدت دروس تجريبية؟	ما عندك كورسات تجريبية؟	أليس	ما			درس:كورس
2147	corpus-6-test-corpus-26-train	MSA	أين يمكنني أن أشتري طوابع بريد ؟	من وين بقدر أشتري طوابع البريد؟	من وين بقدر أشتري طوابع بريد؟	أين	من وين
2148	corpus-6-test-corpus-26-train	MSA	أنا من بريطانيا العظمى .	أنا من بريطانيا العظمى.	أني من بريطانيا الكبيرة.	العظمى	الكبيرة
2156	corpus-6-test-corpus-26-train	MSA	علي أن أفحص ذلك مع زوجتي .	لازم أشيك على الموضوع مع زوجتي.	لازم أشوف الموضوع مع مرتي.	زوجتي	مرتي	أفحص	أشوف
2161	corpus-6-test-corpus-26-train	MSA	أريد أن أحصل على تعويض لذلك .	أنا بدي اخد تعويض على هاد.	أنا بدي اوخد تعويض عن هاظ.	أحصل	اوخذ
2179	corpus-6-test-corpus-26-train	MSA	يوجد صندوق للهاتف أمام هذا المصرف .	هناك في كشك تليفون مقابل هاد البنك.	في كشك تليفون قدام هاذ البنك.	مصرف	بنك	صندوق	كشك	هاتف:تيلفون
2180	corpus-6-test-corpus-26-train	MSA	سأصل في التاسع من مارس وأغادر في الرابع عشر .	راح أوصل بتسعة مارس وراح أروح بأربعطعش.	راح أوصل بتسعة ثلاث وراح أروّح بأربعطعش.	رابع عشر	أربعطعش	أغادر	أروّح
2205	corpus-6-test-corpus-26-train	MSA	هذا غال قليلاً ، ألا تعتقد ؟	هاد غالي شوي، مش شايف هيك؟	هاذ غالي شوي، مش شايف هيك؟	قليلاً	شوي	تعتقد	شايف
2235	corpus-6-test-corpus-26-train	MSA	هل لديك كعب ؟	عندك السيجارة؟	عندك كعب؟	لديك	عندك
2236	corpus-6-test-corpus-26-train	MSA	أين المحطة النهائية للحافلة ؟	وين اخر محطة للباص؟	وين اخر موقف للباص؟	محطة	موقف
2238	corpus-6-test-corpus-26-train	MSA	هل تريد بالحلويات ؟	بدك حلويات؟	بدك حلويات؟	تريد	بدك
2302	corpus-6-test-corpus-26-train	MSA	هل تتحدث ؟	انت بتحكي؟	إنت بتسولف؟	تتحدث	بتسولف
2306	corpus-6-test-corpus-26-train	MSA	الشيء نفسه لي ، من فضلك .	ومثله الي، لو سمحت.	ونفس الشي إلي ، لو سمحت.	لي	إلي
2318	corpus-6-test-corpus-26-train	MSA	طلبي لم يأت .	طلبي ما وصل.	طلبي ما وصل.	يأت	وصل
2324	corpus-6-test-corpus-26-train	MSA	هناك الكثير من الينابيع الحارة .	في كثير ينابيع سخنة.	في كثير ينابيع حارة.	هناك	في
2329	corpus-6-test-corpus-26-train	MSA	من فضلك غير خمسين آلاف ين إلى دولارات أمريكية .	لو سمحت أصرفلي خمسين ألف ين للدولار الأمريكي.	لو سمحت اصرف الخمسين ألف ين لدولر أمريكي.	غير	اصرف
2338	corpus-6-test-corpus-26-train	MSA	هذا حسن بالنسبة لي . في الواقع أحب أن أدخن .	هيك تمام معي. بصراحة أنا بحب أدخن.	هاذ تمام بالنسبة إلي . بصراحة أني بحب أدخن.	حسن	تمام
2347	corpus-6-test-corpus-26-test	MSA	أين يمكنني أن أشتري زلاجات وأحذية ؟	من وين ممكن اشتري زلاجات و أحذية؟	من وين بقدر اشتري زلاجات و أحذية؟
2353	corpus-6-test-corpus-26-dev	MSA	هل نسيت مشروباتنا ؟	انت نسيت عصيرنا؟	نسيت عصيرنا؟	مشروباتنا	عصيرنا
2368	corpus-6-test-corpus-26-test	MSA	هل يمكن أن ترسلها إلى عنواني في اليابان عن طريق بريد الطرود الدولي وتحصل الثمن من هناك ؟	ممكن تبعثلي اياه على عنواني في اليابان من خلال صفحة الطرود الدولي و تاخذ حقه من خلالهم ؟	ممكن توديها على عنواني باليابان عن طريق صفحة الطرود الدولي و توخذ حقه من هناك ؟	ترسلها	توديها	بريد	صفحة
2381	corpus-6-test-corpus-26-train	MSA	أريد كوباً من الخمر الأحمر .	بدي كاسة خمر أحمر.	بدي كاسة واين إحمر.	أحمر	إحمر	كوب	كاسة	خمر: واين
2389	corpus-6-test-corpus-26-train	MSA	فقط إذا كانت ملكك ، سيدي . هاها ، مزحة صغيرة .	بس اذا كانت الك، أستاذ. ههههههه، هاي مزحة صغيرة.	بس اذا كانت ملكك ، يا سيدي . ههههههه، هاي مزحة صغيرة.	هاها	ههههههه
2401	corpus-6-test-corpus-26-train	MSA	بالتأكيد . كيف يمكننا خدمتك ؟	أكيد. كيف بنقدر نساعدك؟	أكيد. كيف منقدر نخدمك؟	يمكننا	منقدر
2412	corpus-6-test-corpus-26-dev	MSA	لدينا بيرة ، وويسكي ، وبراندي ، وجن ، وفودكا ، وخمر .	عنا بيرة، ويسكي، براندي، جن، فوديكا وخمر.	عنا بيرا، ويسكي، براندي، جن، فوديكا وواين.	فودكا	فوديكا
2425	corpus-6-test-corpus-26-train	MSA	تحقيق شخصية . آه ، هل جواز السفر ينفع ؟	تحقيق شخصية. آه ، ممكن جواز السفر ينفع؟	تحقيق شخصية. آه ، جواز السفر بنفع؟
2428	corpus-6-test-corpus-26-train	MSA	رقم غرفتي هو ثلاثة ستة وعشرين . هل يمكن أن تأخذ الغسيل ؟	رقم غرفتي ثلاثة ستة وعشرين. ممكن تاخد غسيلي؟	رقم غرفتي هو ثلاثة ستة وعشرين. بصير توخذ الغسيل؟	هل يمكن	بصير
2440	corpus-6-test-corpus-26-train	MSA	سأرى ما إذا كان أي منها يناسبني .	راح أشوف اذا أي واحد من هدول بتزبط معي.	راح أشوف اذا في اشي منهن بناسبني.	سوف	راح
2441	corpus-6-test-corpus-26-train	MSA	أريد غلاية .	بدي غلاية .	بدي هيتر .					غلاية:هيتر
2445	corpus-6-test-corpus-26-train	MSA	أحضر لي بعض من الجبن المبشور .	أعطيني شوي من الجبنة المبشورة.	هاتلي شوي من الجبنة المبروشة.	مبشور	مبروش	أحضر	هات
2462	corpus-6-test-corpus-26-train	MSA	هل يمكن أن أحصل على قمصاني نظيفة غداً صباحاً ؟	ممكن يكونو قمصاني مغسولين بكرا الصبح؟	ممكن ألاقي قمصاني نظيفات بكرا الصبح؟	أحصل	ألاقي	غداً	بكرا
2476	corpus-6-test-corpus-26-train	MSA	هل لك أن تطلب منه أن يعاود الاتصال بي ؟	ممكن تخليه يتصل فيي بعدين؟	ممكن تخليه يرجع يتصل علي بعدين؟	يعاود	يرجع	تطلب منه	تخليه
2490	corpus-6-test-corpus-26-train	MSA	لماذا إذاً ؟	طيب ليش؟	ليش لعاد؟	إذاً	لعاد
2492	corpus-6-test-corpus-26-train	MSA	عذراً . هل يوجد محل كتب قريب من هنا ؟	عفواً. في حولينا هون مكتبة بتبيع كتب؟	عفواً . في مكتبة بتبيع كتب قريب من هون ؟	عذراً	عفواً	محل كتب	مكتبة
2496	corpus-6-test-corpus-26-test	MSA	أعتقد أنك ارتكبت خطأً . الغرفة دفع ثمنها مسبقاً . معي إيصال .	أظن انك عملت غلط. الغرفة كانت أجرتها مدفوعة. عندي فاتورة.	بظن إنك غلطت. الغرفة حاسبت عنها قبل. معي وصل.	إيصال	وصل	أعتقد	بظن
2505	corpus-6-test-corpus-26-train	MSA	الحافلة هناك .	الباص هناك .	الباص هناك .	حافلة	باص
2516	corpus-6-test-corpus-26-train	MSA	أريد لفتان من ISO مائة ، فيلم ملون ، ستة وثلاثين لقطة ، من فضلك .	بدي شريطين أيزو مية، فيلم ملون، ستة ثلاثين صورة، لو سمحت.	بدي لفتين أيزو مية، فلم ملون، ستة وثلاثين لقطة ، لو سمحت.	لفتان	لفتين	مائة	مية
2519	corpus-6-test-corpus-26-train	MSA	أود أن أصرف هذا الشيك بسبعين دولاراً .	بدي أصرف هاد الشيك بقيمة سبعين دولار.	بدي أصرف هاذ الشيك بقيمة سبعين دولر.
2521	corpus-6-test-corpus-26-train	MSA	أود أن أشتري طوابع لعشرة بطاقات بريدية إلى اليابان ، من فضلك .	أنا بدي أشتري طوابع لعشر بطاقات بريدية لليابان، لو سمحت.	بدي أشتري طوابع لعشر رسائل لليابان، لو سمحت.	بطاقات بريدية	رسائل
2528	corpus-6-test-corpus-26-train	MSA	هل توجد مصارف بالقرب من المحطة ؟	في بنوك قريبة من المحطة؟	في بنوك قريبة من المحطة؟						مصرف:بنك
2531	corpus-6-test-corpus-26-train	MSA	أخشى أن يكون هناك خطأ في الفاتورة .	أنا خايف يكون في خطأ بالفاتورة.	خايف يكون في غلط بالفاتورة.	أخشى	خايف
2552	corpus-6-test-corpus-26-test	MSA	إنه صحيح هنا .	هيو هون.	هو صحيح هون.	إنه	هو
2557	corpus-6-test-corpus-26-train	MSA	واحد شيزبرجر لكي أذهب ، من فضلك .	واحد برجر بالجبنة عشان أروح، لو سمحت.	واحد تشيز برقر عشان أروح، لو سمحت.	أذهب	أروح
2578	corpus-6-test-corpus-26-test	MSA	لم يعد بإمكانك حقيقةً أن تقوم بعمل تصميم دون كمبيوتر بعد الآن .	ما بتقدر تعمل تصميم من دون كمبيوتر من هون و طالع.	بطلت تقدر تعمل تصميم بدون كمبيوتر من هون و طالع.	لم يعد	بطل	بعد الآن	من هون وطالع
2591	corpus-6-test-corpus-26-train	MSA	أجري .	أركض.	أركض.	أجري	أركض
2601	corpus-6-test-corpus-26-train	MSA	هناك قطع في بلوزتي . أتساءل هل يمكنك أن تخيطيه لي ، من فضلك ؟	في خزق هون في بلوزتي. بدي اسألك اذا بتقدر تخيطلي اياه، لو سمحت؟	في مزع ببلوزتي. بدي اسألك اذا بتقدر تخيطلي اياه، لو سمحت؟	قطع	مزع
2613	corpus-6-test-corpus-26-dev	MSA	كم الأجرة إلى مانشستر ؟	قديش الأجرة لمانشستر؟	قديش الأجرة لمانشستر؟	إلى	ل
2643	corpus-6-test-corpus-26-train	MSA	هل يمكن أن تقرضني سلك إمداد ؟	ممكن تعيرني وصلة كهربا؟	ممكن تعيرني وصلة كهربا؟	تقرضني	تعيرني	سلك إمداد	وصلة
2644	corpus-6-test-corpus-26-train	MSA	أين يمكنني أن أشتري حصيرة للشاطئ ؟	من وين بقدر أشتري حصيرة للبحر؟	من وين بقدر أشتري درج للشط؟	حصيرة	درج	شاطئ	شط
2670	corpus-6-test-corpus-26-test	MSA	إذاَ ، من فضلك أعطني حجزاً جديداً .	بعدين، لو سمحت أعطيني حجز جديد.	لعاد، لو سمحت أعطيني حجز جديد.	أعطني	إنطيني
2676	corpus-6-test-corpus-26-train	MSA	أعطني قطعة لحم الخنزير هذه ، ولكن ليس بسمك تلك .	أعطييني شريحة لحم الخنزير هاي، بس ما تكون سميكة مثل هديك.	أعطييني قطعة لحمة الخنزير هاي، بس ما تكون سميكة مثل هذيك.	أعطني	أعطيني	تلك	هذيك
2678	corpus-6-test-corpus-26-train	MSA	سنأتي في السابعة .	راح نيجي الساعة سبعة.	رح نيجي الساعة سبعة.	نأتي	نيجي	سابعة	سبعة
2687	corpus-6-test-corpus-26-train	MSA	عندما أرى الأسعار بهذا الرخص ، يبدو الأمر سخيفاً أن أشتري أي شيء في اليابان .	لما أشوف الأسعار رخيصة مثل هيك، بحس أنه مسخرة الواحد يجيب أي شي من اليابان.	لما أشوف الأسعار بهالرخص ، بحس أنه مسخرة الواحد يشتري أي شي باليابان.	سخيف	مسخرة
2690	corpus-6-test-corpus-26-train	MSA	سرقت سجلاتي ، أيضاً .	انسرقوا تسجيلاتي، كمان.	انسرقت ملفاتي، كمان.	أيضاً	كمان	سرقت	انسرقت
2695	corpus-6-test-corpus-26-train	MSA	مخروط من الأيس كريم الفانيليا ، من فضلك .	قمع بوزة على فانيلا، لو سمحت.	قمع بوزة على فانيلا، لو سمحت.	مخروط	بوري	أيس كريم	بوزة
2702	corpus-6-test-corpus-26-train	MSA	أوافق . يجب أن تصبح طبيعية جداً .	أنا موافق. لازم يكون كثير طبيعي.	أنا موافق. لازم تصير طبيعة كثير.	تصبح	تصير	جداً	كثير
2704	corpus-6-test-corpus-26-train	MSA	لاحظ الفجوة ، لاحظ الفجوة ، ثم قرب الأبواب ، من فضلك .	انتبه للحفرة، انتبه للحفرة، بعدين قرب الابواب، لو سمحت.	لاحظ الفتحة، لاحظ الفتحة ، بعدين قرب الابواب، لو سمحت.	فجوة	فتحة	ثم	بعدين
2707	corpus-6-test-corpus-26-train	MSA	سأحتاج إلى بطاقة ائتمان .	راح أحتاج لبطاقة البنك.	راح أحتاج الفيزا .					بطاقة ائتمان:فيزا
2708	corpus-6-test-corpus-26-dev	MSA	تفضل الرقم .	تفضل الرقم.	تفظل الرقم.	تفضل	تفظل
2715	corpus-6-test-corpus-26-test	MSA	أخبرني عن منطقة جيدة لهذا النهر ، من فضلك .	احكيلي عن موقع كويس في هاد النهر، لو سمحت.	احكيلي عن مكان كويس لهاظا النهر، لو سمحت.	منطقة	مكان	جيدة	كويس
2726	corpus-6-test-corpus-26-train	MSA	من فضلك أعطني تقريراً عن الحادث .	لو سمحت أعطيني تقرير للحادث.	لو سمحت أعطيني تقرير للحادث.
2729	corpus-6-test-corpus-26-train	MSA	لا ، أشكرك حالياً .	لا، شكراً الك لهسا.	لا، شكراً الك حالياً.
2734	corpus-6-test-corpus-26-train	MSA	حسنا ، ابق على الخط . سيد/ ناكاجيما ، الآنسة/ سايتو يبدو أنها لا ترد على المكالمة . هل تريدني أن أتصل عليها فترة أطول ؟	اوك، خليك معي على الخط. السيد ناكاجيما،الست سايتو شكلها ما بترد على المكالمة. بدك أرن عليها لمدة أطول شوي؟	طيب ، خليك معي على الخط. السيد ناكاجيما ، الست سايتو شكلها ما بترد على المكالمة. بدك أرن عليها لمدة أطول شوي؟	ابق	خليك	أتصل	أرن
2736	corpus-6-test-corpus-26-dev	MSA	ربما ، ولكن ينبغي أن ندرس كلا على حدا .	ممكن، بس لازم ندرس كل واحد لحال.	ممكن، بس لازم ندرس كل واحد لحال.	ربما	ممكن	على حدا	لحال
2747	corpus-6-test-corpus-26-train	MSA	يبدو أنها نادرة جداً .	شكلها نادرة كثير.	شكلها نادرة كثير.	يبدو	شكلها
2748	corpus-6-test-corpus-26-train	MSA	أين بيان أمتعة الرحلة سبعة صفر ثلاثة ؟	وين استلام شناتي الرحلة رقم سبعة صفر ثلاثة؟	وين استلام شناتي الرحلة رقم سبعة صفر ثلاثة؟	بيان	استلام
2760	corpus-6-test-corpus-26-train	MSA	شيء خطأ مع حقيبتك .	شيء غلط مع شنتيتك .	اشي غلط بشنتك .	حقيبتك	شنتك
2765	corpus-6-test-corpus-26-train	MSA	هل هذا سيفسد ؟	راح يكون خراب؟	هاذ رح يخرب؟	يفسد	يخرب
2772	corpus-6-test-corpus-26-train	MSA	لا ، شكراً . من الأفضل أن لا أشرب المزيد .	لا، شكراً. من الاحسن ما أشرب اكثر من هيك.	لا، شكراً. احسنلي ما أشرب اكثر من هيك.	المزيد	اكثر
2808	corpus-6-test-corpus-26-train	MSA	من فضلك أخبرني عن بعض الشوارع المناسبة للتسوق .	لو سمحت احكيلي شوية عن شوارع منيحة للتسوق.	لو سمحت احكيلي عن شوية شوارع مليحة للتسوق.	مناسبة	مليحة
2811	corpus-6-test-corpus-26-dev	MSA	هل هذه الحافلة تذهب إلى فندق هيلتون ؟	هاد الباص بودي لفندق الهيلتون؟	هاذ الباص بروح لفندق الهيلتون؟	يذهب	بروح
2816	corpus-6-test-corpus-26-train	MSA	الآن ، هذه اللوحة خاصة جداً . رسمها تسوروتارو كاتاأوكا . إنه معروف بأنه فنان عالمي .	هسا، هاي اللوحة كثير مميزة. رسمها تسوروتارو كاتاأوكا. وهو مصنف على انه فنان عالمي.	هسا، هاي اللوحة كثير مميزة. رسمها تسوروتارو كاتاأوكا. معروف هاذ فنان عالمي.	خاصة	مميزة
2850	corpus-6-test-corpus-26-train	MSA	لدي تقدير كبير للموسيقى الكلاسيكية .	عندي إحترام كبير للموسيقى الكلاسيكية.	كثير بقدر الموسيقى الكلاسيكية.
2851	corpus-6-test-corpus-26-dev	MSA	هل يمكنني أن أدعوك للعشاء في الخارج وقتاً ما ؟	بقدر اعزمك على العشا برا بأي وقت؟	بقدر اعزمك على العشا برا يوماً ما؟	الخارج	برا	أدعوك	اعزمك
2862	corpus-6-test-corpus-26-train	MSA	حسنا . ما هو اسم شريكك ورقمه ، من فضلك .	تمام. شو اسم شريكك ورقم تلفونه، لو سمحت.	ماشي . شو اسم شريكك ورقمه، لو سمحت.	حسنا	ماشي	اسم	إسم
2871	corpus-6-test-corpus-26-train	MSA	عذراً . دعني أخرج ، من فضلك .	عفوا. مرقني، لو سمحت.	عفوا. خليني أطلع، لو سمحت.	أخرج	أطلع	دعني	خليني
2878	corpus-6-test-corpus-26-train	MSA	هل يمكنك أن تستدعي موظفاً يتحدث اليابانية ؟	ممكن تنادي موظف بحكي باللغة اليابانية؟	ممكن تنادي موظف بحكي بالياباني؟	تستدعي	تنادي
2898	corpus-6-test-corpus-26-train	MSA	نزور أقاربنا كثيراً إلى حد ما .	احنا منزور قرايبنا دائما وأبداً.	إحنا منزور قرايبنا كثير كثير .	أقاربنا	قرايبنا
2939	corpus-6-test-corpus-26-train	MSA	ميكي هاياكاوا . هذه غرفة سبعة صفر اثنين .	ميكي هاياكاوا. هاي غرفة رقم سبعة صفر اثنين.	ميكي هاياكاوا. هاي غرفة رقم سبعة صفر اثنين.
2945	corpus-6-test-corpus-26-train	MSA	علي أن أمكث هنا الليلة ، أليس كذلك ؟ هل يمكنك مساعدتي حجز غرفة بفندق ؟	لازم أضل هون الليلة، بقدر؟ بتقدر تساعدني أحجز غرفة بفندق؟	لازم أظل هون الليلة، مش هيك؟ بتقدر تساعدني أحجز غرفة بفندق؟	أمكث	أظل	كذلك	هيك
2947	corpus-6-test-corpus-26-train	MSA	يجب أن لا تكون طويلة . خمسة عشر دقيقة في الأغلب .	المفروض ما يطول. خمسطعشر دقيقة كحد أقصى.	المفروض ما يطول. خمسطعشر دقيقة غالباً.	في الأغلب	غالباً	يجب	المفروض
2960	corpus-6-test-corpus-26-train	MSA	هل يمكنك أن تخبرني بقيمة هذه المكالمة ؟	بتقدر تحكيلي تكلفة هاي المكالمة؟	بتقدر تحكيلي تكلفة هاي المكالمة؟	قيمة	تكلفة	هذه	هاي
2964	corpus-6-test-corpus-26-train	MSA	حسنا ، هل يمكنك أن تخبرها أنني اتصلت ، من فضلك ؟ سأتصل بها مرة أخرى فيما بعد .	طيب، بتقدر تحكيلها اني اتصلت، لو سمحت؟ راح أتصل فيها مرة تانية بعدين.	طيب، بتقدر تحكيلها اني اتصلت، لو سمحت؟ راح أتصل فيها مرة ثانية بعدين.	حسنا	طيب	أخرى	ثانية
2973	corpus-6-test-corpus-26-train	MSA	هل توجد أية جولة صباحية ؟	في أي جولات صباحية؟	في أي جولات صباحية؟	أية	أي
2982	corpus-6-test-corpus-26-train	MSA	هل تغير عملات أجنبية ؟	انت بتصرف عملات أجنبية؟	إنت بتصرف عملات أجنبية؟	تغير	بتصرف
2983	corpus-6-test-corpus-26-test	MSA	إجمالي ميزانيتنا حوالي خمسين دولاراًً لثلاثة أشخاص .	ميزانيتنا حوالي خمسين دولار مشمولة لثلاث أشخاص.	ميزانيتنا كلها حوالي خمسين دولار لثلاث أشخاص.	إجمالي	كلها
2990	corpus-6-test-corpus-26-train	MSA	أن يمكنني أن أشتري لفة من الفيلم ؟	من وين بقدر أشتري شريط أو فلم تصوير؟	من وين بقدر أشتري شريط أو فلم تصوير؟	لفة	شريط
2995	corpus-6-test-corpus-26-train	MSA	هل لديك بيرة يابانية ؟	عندك بيرة يابانية؟	عندك بيرا يابانية؟	بيرة	بيرا
3001	corpus-6-test-corpus-26-test	MSA	أريد بذلة استحمام مقاس صغير , من فضلك .	بدي بدلة سباحة مقاسها صغير، لو سمحت.	بدي بدلة سباحة مقاسها صغير، لو سمحت.	بذلة	بدلة	استحمام	سباحة
3016	corpus-6-test-corpus-26-train	MSA	أريد تسجيل أمتعتي .	بدي أسجل شنطي.	بدي أسجل شنطي.	أمتعتي	شنطي
3029	corpus-6-test-corpus-26-train	MSA	هذه السيدة كاوازو في غرفة رقم ستة عشر أحدى عشر .	معك الآنسة كاوازو من الغرفة ستطعش حدعش.	هاي الست كاوازو بالغرفة سطعش إحدعش.	سيدة	ست	إحدى عشر	إحدعش
3030	corpus-6-test-corpus-26-train	MSA	مرحباً بك .	العفو.	يا مرحبا فيك.	بك	فيك
3038	corpus-6-test-corpus-26-dev	MSA	لا يوجد أي منها .	ما في منهم.	ما في منهم.	لا	ما
3040	corpus-6-test-corpus-26-train	MSA	أيهما أكثر أهمية للشعب الياباني , عيد رأس السنة أم عيد الكريسماس ؟	مين أهم للناس اليابانيين، ليلة راس السنة والا عيد الكريسماس؟	شو هو الأهم للشعب الياباني ، ليلة راس السنة ولا عيد الكريسماس؟	رأس	راس	ولا	أم
3041	corpus-6-test-corpus-26-test	MSA	رقم مقعدك هو اثنان وثلاثون أ . بعد ذلك سر في خط مستقيم في هذه الطرقة . إنه المقعد المجاور للنافذة .	رقم مقعدك اثنين وثلاتين أ. بعدين، امشي دغري لاخر هاد الممر. المقعد اللي على الشباك.	رقم مقعدك اثنين وثلاتين أ. بعدين، امشي دغري لاخر هاد الممر. المقعد اللي عندالشباك.	سر	امشي	طريق مستقيم	دغري
3073	corpus-6-test-corpus-26-train	MSA	لحظة من فضلك .	بس دقيقة، لو سمحت.	لحظة لو سمحت.	لحضة	لحظة
3109	corpus-6-test-corpus-26-train	MSA	من فضلك أكمل البيانات الناقصة في التقرير .	لو سمحت عبيلي البيانات الناقصة في التقرير.	لو سمحت كمّل البيانات الناقصة في التقرير.	أكمل	كمّل
3111	corpus-6-test-corpus-26-dev	MSA	لا أفهم الإنجليزية الأمريكية ، إنما أتحدث الإنجليزية الراقية .	أنا ما بفهم أمريكي، أنا بحكي بالانجليزي البريطاني.	ما بفهم الإنجليزي الأمريكي، أنا بحكي بالانجليزي الراقي.	إنجليزية	إنجليزي
3120	corpus-6-test-corpus-26-train	MSA	منذ أمس .	من مبارح.	من مبارح.	منذ	من
3129	corpus-6-test-corpus-26-train	MSA	تشمل تأمين ضد التصادم والدين .	بيضمن تأمينا ضد التصادم والدين.	بتشمل تأمين ظد التصادم والدين.	ضد	ظد
3134	corpus-6-test-corpus-26-test	MSA	فقدت بطاقة المطالبة .	ضيعت بطاقة الاستلام تبعي.	ضيعت بطاقة الاستلام تبعي.	فقدت	ضيعت	مطالبة	استلام
3152	corpus-6-test-corpus-26-train	MSA	هل لديكم دبابيس زينة ذات تصميمات رائعة ؟	عندك دبابيس بتصميمات حلوة؟	عندك بروشات شكلها حلو؟	رائع	حلو	تصميم	شكل	دبوس زينة:بروش
3155	corpus-6-test-corpus-26-train	MSA	إنني أتصل من كشك عمومي في ماسي .	أنا بحكي معك من كشك عام في ماسي.	أنا بحكي معك من كشك عام بماسي.	عمومي	عام
3170	corpus-6-test-corpus-26-test	MSA	هذه كبيرة جداً .	هاي كثير كبيرة.	هاي كثير كبيرة.
3176	corpus-6-test-corpus-26-train	MSA	كم أجر الانتظار في الساعة ؟	كم تكلفة الصفة لكل ساعة؟	كم تكلفة الصفة لكل ساعة؟	أجر	تكلفة	الانتظار	الصفة
3179	corpus-6-test-corpus-26-train	MSA	سيداتي سادتي ، لدينا على متن رحلتنا اليوم مضيفين يتحدثون اليابانية يمكن التعرف عليهم من خلال الشارة التي يلبسونه . إذا كنت تعرف أي شخص يريد مساعدة في الترجمة ، من فضلك دعنا نعرف .	السيدات والسادة، في رحلتنا اليوم، عنا حضور بحكوا اللغة اليابانية معرفين من دبوس العلم اللي لابسينه. إذا عرفتوا إنه أي حد منهم بحتاج مساعدة في الترجمة، لو سمحتوا خبرونا.	سيداتي وسادتي،برحلتنا اليوم، عنا مضيفين بحكوا ياباني بتعرفوهم من الباجة اللي لابسينها. إذا بتعرف إنه أي حد بحتاج مساعدة بالترجمة، لو سمحت خلينا نعرف.	شخص	حد	يتحدثون	بحكوا	شارة:باجة
3182	corpus-6-test-corpus-26-train	MSA	هل توجد أي حقبة معينة للفن تفضلها ؟	في أي نقطة معينة في الفن انت بتفضلها؟	في أي فترة معينة بالفن إنت بتفضلها؟	حقبة	فترة	أنت	إنت
3185	corpus-6-test-corpus-26-train	MSA	من فضلك تحقق منها مرة أخرى .	لو سمحت اتأكد منها مرة ثانية.	لو سمحت اتأكد منها مرة ثانية.	تحقق	اتأكد
3195	corpus-6-test-corpus-26-train	MSA	سر في خط مستقيم على طول النهر حوالي نصف ميل . ستصل للمتنزه .	ضلك ماشي دغري على طول النهر حوالي نص ميل. راح تصير في الحديقة.	إمشي دغري على طول النهر حوالي نص ميل. بتصل المنتزه.	متنزه	منتزه	نصف	نص
3201	corpus-6-test-corpus-26-dev	MSA	كلاً ، إنهم متينين جداً .	لا، هدول كثير متينيين.	لا، هظول كثير قويات.	إنهم	هظول	متين	قوي
3207	corpus-6-test-corpus-26-train	MSA	حسناً ، سأرسلها لك إلى لاس فيجاس .	اوك، راح أبعثلك اياهم على لاس فيجاس.	اوك، راح أبعثها إلك على لاس فيجاس.	إلى	على	لك	إلك	حسنا:اوك
3209	corpus-6-test-corpus-26-train	MSA	أبحث عن قميص للجري .	أنا بدور على قميص للركض.	بدور عقميص للركض.	جري	ركض	أبحث	بدور
3220	corpus-6-test-corpus-26-train	MSA	هل تود شرب شيئاً من الحانة ؟	بتحب تشرب أي اشي من البار؟	بتحب تشرب إشي من البار؟	شيئاً	إشي			حانة: بار
3222	corpus-6-test-corpus-26-dev	MSA	هذا الطريق من فضلك . خذ هذا المصعد .	هاد الطريق لو سمحت. خد هاد المصعد.	هاذ الطريق لو سمحت. أخدذ هاذ السلم.	خذ	أخذ
3238	corpus-6-test-corpus-26-train	MSA	من الأفضل أن تستقل قطار الثامنة والنصف .	الأفضل الك تطلع بقطار الساعة ثمنية ونص.	الأفضل إنك تطلع بقطار الساعة ثمنية ونص.	تستقل	تطلع
3267	corpus-6-test-corpus-26-test	MSA	هل يوجد دار للسينما بالقرب من هنا ؟	في هون سينيما قريبة؟	في سينيما قريبة من هون؟	هنا	هون
3269	corpus-6-test-corpus-26-train	MSA	الآن موسم جمع المحار ، لذلك سيكونون في حالة جيدة .	هسا موسم جمع المحار، عشان هيك بيكونو طيبين.	هسا موسم جمع المحار، عشان هيك بيكونو طيبين.	بحالة جيدة	طيب
3279	corpus-6-test-corpus-26-train	MSA	أريد ساعة مستعملة .	بدي ساعة مستعملة.	بدي ساعة مستعملة.	أريد	بدي
3284	corpus-6-test-corpus-26-train	MSA	سأقوم بتسجيل الدخول في تمام الساعة الثامنة مساءاً تقريباً .	راح أنزل بالفندق حوالي الساعة تسعة بالليل.	راح أنزل بالفندق حوالي الساعة ثمنية المسا .	اسجل دخول	أنزل
3285	corpus-6-test-corpus-26-train	MSA	الوقت يتأخر . يجب أن أرحل .	الوقت تأخر. لازم أروح.	الوقت تأخر. لازم أروح.	أرحل	اروح
3289	corpus-6-test-corpus-26-train	MSA	لم أستخدم خدمة الغسيل عندكم . أيمكنك التحقق مرة أخرى ؟	أنا ما استخدمت خدمة الغسيل تبعتكم. بتقدر تتأكدلي من هاد مرة تانية؟	أني ما استخدمت خدمة الغسيل تبعتكم. بتقدر تتأكد مرة ثانية؟	لم	ما	تتحقق	تتأكد
3292	corpus-6-test-corpus-26-train	MSA	أريد شاي من فضلك .	بدي شاي، لو سمحت.	بدي شاي إذا بتسمح.	من فضلك	إذا بتسمح
3295	corpus-6-test-corpus-26-train	MSA	كلاً ، لا يوجد .	لا، ما في.	لا، ما في.	كلا	لا
3304	corpus-6-test-corpus-26-train	MSA	هل هذه هي آخر محطة ؟	هاد آخر موقف؟	هاظا آخر موقف؟	محطة	موقف
3318	corpus-6-test-corpus-26-train	MSA	لنتصل به .	خلينا نرلنه.	خلينا نرلنه.	نتصل	نرن
3323	corpus-6-test-corpus-26-train	MSA	هل هذا المتبل حار ؟	هاد المتبل حار؟	هاظ المتبل حار؟
3334	corpus-6-test-corpus-26-train	MSA	أين يمكنني أن أستقل حافلة لمشاهدة المعالم ؟	من وين ممكن اركب باص لحتى اتفرج ع المعالم؟	من وين ممكن اركب باص لحتى اتفرج ع المعالم؟	أشاهد	أتفرج	أستقل	اركب
3335	corpus-6-test-corpus-26-train	MSA	أجل ، أريد مشاهدة معالم المدينة .	اه، أنا بدي اشوف معالم المدينة.	اه، أنا بدي اشوف معالم المدينة.	أجل	اه	أشاهد	اشوف
3351	corpus-6-test-corpus-26-test	MSA	يوجد الكثير من السائحين بالقرب من المبنى ، ويبدو أنهم تجمعوا لإلقاء نظرة على ما يحدث .	في كتير سياح حوالين البناية، شكلهم متجمعين عشان يشوفوا شو اللي بصير.	في كتير سواح حوالين البناية، شكلهم متجمعين عشان يشوفوا شو اللي بصير.	سائحين	سواح	يلقي نظرة	يشوف
3359	corpus-6-test-corpus-26-train	MSA	شكراً على كرم ضيافتك .	شكراً الك على حسن الضيافة.	شكراً الك على حسن الضيافة.	كرم	حسن
3375	corpus-6-test-corpus-26-train	MSA	الأمانة هي السياسة المثلى .	الأمانة هي أحسن سياسة.	الأمانة هي أحسن سياسة.	مثلى	أحسن
3385	corpus-6-test-corpus-26-train	MSA	هل لك أن توقظني في تمام السادسة من فضلك ؟	بتقدر تصحيني الساعة ستة، لو سمحت؟	بتقدر تصحيني الساعة ستة، لو سمحت؟	توقظني	تصحيني
3392	corpus-6-test-corpus-26-train	MSA	كم السعر لنصف يوم ؟	كم بكلف لمدة نص يوم؟	قديش التكلفة لنص يوم؟	كم	قديش
3397	corpus-6-test-corpus-26-train	MSA	أنا كينجي .	أنا كينجي.	أني كينجي.
3402	corpus-6-test-corpus-26-train	MSA	هل تعرف أي أماكن جيدة لمشاهدتها في شيكاجو ؟	بتعرف أي أماكن حلوة نشوفها في شيكاجو؟	بتعرف أي أماكن حلوة نشوفها بشيكاغو؟	جيدة	حلوة
3404	corpus-6-test-corpus-26-train	MSA	حسناً ، في حالة إصرار كليكما , سأذهب معكما .	طيب، اذا انتو الاثنين مصرين، أنا راح اروح معكم.	طيب، اذا انتو الاثنين مصرين، أني راح اروح معكو.	في حالة	إذا	معكم	معكو
3413	corpus-6-test-corpus-26-dev	MSA	هل لك أن تستبدل هذه بواحدة أخرى من نفس النوع من فضلك ؟	ممكن تبدل هاي بوحدة ثانية من نفس النوع، لو سمحت؟	ممكن تبدل هاي بوحدة ثانية من نفس النوع، لو سمحت؟	تستبدل	تبدل	هل لك	ممكن
3446	corpus-6-test-corpus-26-train	MSA	أريد القيام بحجز للساعة الثالثة والنصف ظهراُ .	بدي أعمل حجز للساعة ثلاثة ونص الظهر.	بدي أعمل حجز للساعة ثلاثة ونص الظهر.	أقوم	أعمل
3489	corpus-6-test-corpus-26-train	MSA	خزينة الودائع , من فضلك .	صندوق الأمان، لو سمحت.	صندوق الأمانات ، لو سمحت.	ودائع	أمانات	خزينة	صندوق
3502	corpus-6-test-corpus-26-train	MSA	من فضلك أحضر نبيذاً مناسباُ .	لو سمحت جيب خمر مناسب.	لو سمحت جيب واين مليح.	مناسب	مليح	أحضر	جيب	نبيذ:واين
3512	corpus-6-test-corpus-26-test	MSA	أريد مكان ما صغير .	بدي أي مكان صغير.	بدي أي مكان صغير.	ما	أي
3522	corpus-6-test-corpus-26-train	MSA	هل مطلوب منى دفع ثمن الغاز ؟	لازم علي أدفع حق الغاز؟	مطلوب مني أدفع حق الغاز؟	ثمن	حق
3557	corpus-6-test-corpus-26-train	MSA	لص . أمسكوا به .	حرامي. امسكوه .	حرامي. امسكوه .	لص	حرامي
3562	corpus-6-test-corpus-26-test	MSA	نحن في انتظار حضور أصدقائنا .	احنا منستني صحابنا يجيو.	احنا منستني صحابنا يجوا.	يحضروا	يجوا	نحن	إحنا
3572	corpus-6-test-corpus-26-train	MSA	من فضلك أعطني بعض النقود الفكة .	لو سمحت أعطيني شوية فراطة.	لو سمحت أعطيني شوية فراطة.	نقود فكة	فراطة	بعض	شوية
3619	corpus-6-test-corpus-26-test	MSA	تموج شعر دائم مشدود من فضلك .	كيرلي قوي، لو سمحت.	كيرلي عطول مشدود، لو سمحت.	دائم	عطول			تموج شعر: كيرلي
3628	corpus-6-test-corpus-26-train	MSA	إنها صغيرة الجسم وذكية .	هي صغيرة الحجم و ذكية.	هي صغيرة الحجم و ذكية.	جسم	حجم
3638	corpus-6-test-corpus-26-test	MSA	ما عرض الأوبرا اليوم ؟	شو عرض الأوبيرا اليوم؟	شو عرض الأوبيرا اليوم؟	أوبرا	أوبيرا
3640	corpus-6-test-corpus-26-train	MSA	مقلي من فضلك .	مقلي، لو سمحت.	مقلي، لو سمحت.
3644	corpus-6-test-corpus-26-train	MSA	غسيلي لم يرجع حتى الآن .	غسيلي ما رجع لحد هسا.	غسيلي ما رجع لحد هسا.	حتى	لحد
3649	corpus-6-test-corpus-26-train	MSA	على فكرة , هل أنت غير مشغول السبت القادم ؟	بالمناسبة، راح تكون فاضي السبت الجاي؟	بالمناسبة، راح تكون فاضي السبت الجاي؟	غير مشغول	فاضي
3667	corpus-6-test-corpus-26-train	MSA	حسناً ، إذن , ربما سننسجم مع بعضنا .	طيب، بعدين، ممكن نرتاح لبعض .	طيب، يعني ، ممكن نرتاح لبعض .	ننسجم	نرتاح	إذن	يعني
3669	corpus-6-test-corpus-26-train	MSA	إنها عاملتني كما لو كنت متسولاُ .	عاملتني كأني شحاد.	عاملتني كإني شحاد.	كما لو كنت	كإني	متسول	شحاد
3683	corpus-6-test-corpus-26-train	MSA	أفهم . هل يمكنك مساعدتي في هذا المشكلة الأخرى أيضاُ ؟	فاهم. ممكن تساعدني بهاي المشكلة الثانية كمان ؟	فاهم. ممكن تساعدني بهاي المشكلة الثانية كمان ؟	أيضاً	كمان	أفهم	فاهم
3685	corpus-6-test-corpus-26-train	MSA	هل يمكنك وضع عدسات نظر في هذا النظارة الشمسية ؟	ممكن تركبلي عدسات طبية على هاي النظارة الشمسية؟	ممكن تركبلي عدسات طبية على هاي النظارة الشمسية؟	تضع	تركب
3698	corpus-6-test-corpus-26-dev	MSA	سآخذ اثنين من هذه .	راح أخد ثنتين من هاي.	راح أوخد ثنتين من هاي.	اثنتان	ثنتين
3705	corpus-6-test-corpus-26-train	MSA	يا لها من كلاب ذكية . من أي فصيلة ؟	يا الله شو هالكلاب ذكية . شو نوعهم؟	يا الله شو إنها كلاب ذكية . من أي فصيلة؟
3721	corpus-6-test-corpus-26-train	MSA	وقعت منى الشوكة . من فضلك أحضر واحدة أخرى .	وقعت مني شوكتي. لو سمحت جبلي وحدة ثانية.	وقعت مني الشوكة. لو سمحت جبلي وحدة ثانية.	أحضر	جيب
3742	corpus-6-test-corpus-26-train	MSA	كان هذا ممتعاً .	هاد كان ممتع.	كان هاذا بسلي.	هذا	هاذا	ممتع	بسلي
3747	corpus-6-test-corpus-26-train	MSA	بالتأكيد . سر في خط مستقيم ثم اتجه يميناُ عند الناصية الثالثة . ستجده على يمينك .	أكيد. امشي دغري ولف يمين من الدخلة الثالثة. راح تلاقيه على يمينك.	أكيد. امشي دغري ولف يمين من الدخلة الثالثة. راح تلاقيه على يمينك.	تجده	تلاقيه	اتجه	لف
3765	corpus-6-test-corpus-26-dev	MSA	هل لديكم فيلم شفاف ملون ؟	عندك شريط للصور الملونة؟	عندك فلم شفاف ملون؟	فيلم	فلم
3780	corpus-6-test-corpus-26-train	MSA	أتعرف كاثي ؟ إنه عيد ميلادها .	بتعرف كاثي؟ هاي حفلة عيد ميلادها.	بتعرف كاثي؟ هاي حفلة عيد ميلادها.
3789	corpus-6-test-corpus-26-train	MSA	هل لديك لوحة موضوع عليها الألوان ؟	عندك لوحة ملونة؟	عندك لوحة ملونة؟
3792	corpus-6-test-corpus-26-dev	MSA	هل يمكنني أن أدفع بشيكات سياحية ؟	بقدر أدفع عن طريق شيكات سياحية؟	بقدر أدفع عن طريق شيكات سياحية؟
3806	corpus-6-test-corpus-26-train	MSA	لكن ، هو , يا رجل كيف أعرف أنه الشيء الحقيقة ؟	بس، هو، يا زلمة كيف بدي أعرف أنه هاد اشي حقيقي؟	بس ، هو، يا زلمة كيف بدي أعرف أنه هاظ الإشي حقيقي؟	رجل	زلمة	لكن	بس
3825	corpus-6-test-corpus-26-train	MSA	هل يمكنني شرائها معفاة من الضرائب ؟	بقدر اشتريه من دون ضريبة؟	بقدر اشتريها معفية من الضرايب؟	ضرائب	ضرايب	معفاة	معفية
3829	corpus-6-test-corpus-26-train	MSA	لا يمكنني وضع الأمتعة تحت المقعد . هل لك أن تحتفظ بها لأجلي من فضلك ؟	أنا ما بقدر أحط شنتي تحت المقعد. ممكن تحتفظلي فيهم، لو سمحت؟	أنا ما بقدر أحط شنطي تحت المقعد. ممكن تخبيلي ياهم لو سمحت؟	تحتفظ	تخبي
3835	corpus-6-test-corpus-26-train	MSA	هل يمكن أن تضع حقيبة السفر هذه في صندوق السيارة .	ممكن لو سمحت تحطلي شنتت السفر في طبون السيارة؟	ممكن لو سمحت تحطلي شنة السفر هاي بالطبون ؟	صندوق السيارة	طبون	تضع	تحط
3847	corpus-6-test-corpus-26-train	MSA	أنا خارج الآن . لذلك سآخذها .	أنا طالع هسا، لهيك راح أستلمه.	أنا طالع هسا، لهيك راح أوخذها.	لذلك	لهيك	خارج	طالع
3856	corpus-6-test-corpus-26-train	MSA	من فضلك أرسل أحداً للطابق العلوي ليأخذ حقائبي الساعة السادسة والنصف .	لو سمحت ابعثلي حدا فوق عشان شناتيي الساعة ستة ونص.	لو سمحت ودي حدا للطابق الفوقاني عشان يوخذ شناتيي الساعة ستة ونص.	أرسل	ودي	علوي	فوقاني
3858	corpus-6-test-corpus-26-dev	MSA	أريد خريطة لسان فرانسيسكو والمنطقة المحيطة .	بدي مخطط سان فرانسيسكو والمنطقة يلي حواليها.	بدي خريطة لسان فرانسيسكو والمنطقة اللي حويلاها.	محيطة	حويلاها
3859	corpus-6-test-corpus-26-train	MSA	ما نوع الخبز لديكم ؟	شو نوع الخبز اللي عندكم؟	شو نوع الخبز اللي عندكو؟	لديكم	عندكو
3860	corpus-6-test-corpus-26-train	MSA	أين المصعد ؟	وين المصعد؟	وين الأصنصير؟	أين	وين			مصعد : اصنصير
3861	corpus-6-test-corpus-26-train	MSA	هل يوجد أحد يستطيع العزف على البيانو ؟	في أي حدا بقدر يعزف على البيانو؟	في أي حدا بعرف يعزف عالبيانو؟	يوجد	في	أحد	حا
3872	corpus-6-test-corpus-26-test	MSA	في أي محطة سأنزل للذهاب إلى مبنى إمباير ستيت ؟	بأي محطة لازم أنزل عشان أروح على عمارة امباير ستيت؟	بأي موقف لازم انزل عشان أروح على عمارة امباير ستيت؟	مبنى	عمارة
3887	corpus-6-test-corpus-26-test	MSA	تبلغ الميزانية أقل من ألف دولار .	الميزانية أقل من ألف دولار.	الميزانية أقل من ألف دولار.
3892	corpus-6-test-corpus-26-train	MSA	شكراً . لكنني لا أعتقد أن عندي وقت للإقامة لمدة ليلتين . هل يمكنك حجز غرفة بسريرين لي في ذلك الفندق ليلة الثاني عشر من مارس فقط ؟	شكراً الك، بس ما بتوقع أنه معي وقت عشان أضل ليلتين. ممكن تحجزلي غرفة مزدوجة في الفندق لليلة اثنعش من مارس بس؟	شكراً ، بس ما بتوقع أنه معي وقت عشان أظل ليلتين. ممكن تحجزلي غرفة مزدوجة في الفندق لليلة اثنعش ثلاث بس؟	مارس	ثلاث	أعتقد	بتوقع
3900	corpus-6-test-corpus-26-dev	MSA	هل يمكنني حجز غرفة بسريرين تطل على المحيط ؟	ممكن أحجز غرفة مزدوجة مطلة على البحر؟	بصير أحجز غرفة بتختين بطل على البحر؟	هل يمكنني	بصير
3920	corpus-6-test-corpus-26-train	MSA	لم نقرر بعد .	لسا ما قررنا لهسا.	بعدنا ما قررنا .	نقرر	قررنا
3928	corpus-6-test-corpus-26-train	MSA	تعثر صديقي والتوي كاحله .	صاحبي وقع وصار عنده التواء بالكاحل.	صاحبي وقع والتوى كاحله.	تعثر	وقع	صديقي	صاحبي
3936	corpus-6-test-corpus-26-train	MSA	سأجرب بعضاً من الشراب المثلج .	بدي أجرب عصير البارد.	بدي أجرب شوي من العصير المثلج.	شراب	عصير
3961	corpus-6-test-corpus-26-train	MSA	هل يوجد مطعم تايلاندي قريب من هنا ؟	في هون مطعم تايلندي قريب؟	في مطعم تايلندي قريب من هون؟	يوجد	في
3972	corpus-6-test-corpus-26-train	MSA	إنها بجور ذلك المبنى المرتفع . لذلك ارجع في نفس الطريق الذي أتيت منه حتى إشارة المرور . ثم اتجه يساراً .	على اليمبن جنب العمارة الطويلة. لهيك ارجع مرة ثانية من نفس الطريق اللي اجيت منه لعند ما تلاقي الاشارة. وبعدها روح يسار.	جنب العمارة الطويلة. لهيك ارجع مرة ثانية من نفس الطريق اللي اجيت منه لعند ما تلاقي الاشارة. وبعدها روح يسار.	اتجه	روح	مرتفع	طويل
3974	corpus-6-test-corpus-26-train	MSA	علي أن ألحق طائرة متجهة للوس أنجليس باكر صباح غد .	لازم ألاقي طيارة على لوس أنجلوس بكرا الصبح بكير.	لازم ألحق طيارة لوس أنجلوس بكرا الصبح بكير.	باكر	بكير	علي أن	لازم
3988	corpus-6-test-corpus-26-train	MSA	إذاً يمكنني بكل ثقة أن أزكي برج مدينة سان فرانسيسكو . فهذا يعطيك فكره عن سان فرانسيسكو .	انا أكيد بنصحك ب برج مدينة سان فراسيسكو. رح تعطيك لمحة عن سان فرانسيسكو.	يعني بنصحك عالأكيد ب برج مدينة سان فراسيسكو. رح يعطيك لمحة عن سان فرانسيسكو.	فكرة	لمحة	أزكي	بنصح
3991	corpus-6-test-corpus-26-train	MSA	أريد الحصول على تأمين .	بدي أعمل تأمين.	بدي تأمين.
3995	corpus-6-test-corpus-26-test	MSA	لنستخدم كيس بارد لتخفيف الألم .	خليني أحط كمادة باردة عشان يخف الوجع.	خلينا نستخدم كمادة باردة عشان يخف الوجع.	كيس	كمادة	ألم	وجع
4013	corpus-6-test-corpus-26-train	MSA	تريد أن تشتري ثوبا .	هي بدها تشتري فستان.	هي بدها تشتري فسطان.	ثوب	فسطان
4016	corpus-6-test-corpus-26-train	MSA	كم أجرة التاكسي حتى هذا الفندق ؟	كم بكلف التكسي لعند الفندق؟	كم أجرة التكسي لعند الفندق؟	حتى	لعند
4017	corpus-6-test-corpus-26-train	MSA	أين الحمام ؟	وين الحمام؟	وين الحمام؟	أين	وين
4034	corpus-6-test-corpus-26-train	MSA	هل يكلفني دخول هذا المبنى أي أموال ؟	بكلف أي اشي عشان أدخل هاي العمارة؟	بدفع أي مصاري إذا فتت على هاي العمارة؟	أموال	مصاري	دخلت	فتت
4036	corpus-6-test-corpus-26-train	MSA	قم بها بطريقتك .	اعملها بطريقتك.	اعملها بطريقتك.	قم	اعملها
4082	corpus-6-test-corpus-26-test	MSA	أنا أبحث عن شيء أنيق .	عم بدور على اشي أنيق.	أني بدور على اشي لايق.	أنيق	لايق	أبحث	بدور
4104	corpus-6-test-corpus-26-train	MSA	النافذة محشورة .	الشباك بمكان ضيق.	الشباك محشور بالزواية.	نافذة	شباك
4109	corpus-6-test-corpus-26-dev	MSA	على أي جانب من ميدان الاتحاد هي ؟	على اي جهة من ميدان الاتحاد بتكون؟	على اي جهة من دوار الاتحاد بتكون؟	ميدان	دوار	جانب	جهة
4119	corpus-6-test-corpus-26-train	MSA	نصف أوقية من شانيل رقم خمسة من فضلك .	نص أوقية من شانيل رقم خمسة، لو سمحت.	نص أوقية من شانيل رقم خمسة، لو سمحت.	نصف	نص
4129	corpus-6-test-corpus-26-train	MSA	ما رأيك في بعض القهوة ؟	شو رأيك بشوية قهوة؟	شو رأيك بكاس قهوة؟
4143	corpus-6-test-corpus-26-train	MSA	هل أنا بحاجة إلى تذكرة ؟	بحتاج تذكرة؟	بحتاج تذكرة؟
4182	corpus-6-test-corpus-26-train	MSA	ما هي تكلفة الخدمة تقريبا ؟	قديش بتكلف الخدمة تقريبا؟	قديش بتكلف الخدمة تقريبا؟
4185	corpus-6-test-corpus-26-train	MSA	كم المدة التي يستغرقها من هنا ؟	قديش بعدها عن هون؟	قديش بوخذ وقت من هون؟	يستغرق	بوخذ	مدة	وقت
4187	corpus-6-test-corpus-26-train	MSA	كريمة وسكر ؟	كريمة وسكر؟	كريمة وسكر؟
4193	corpus-6-test-corpus-26-train	MSA	هل ثمة تخفيضات للأعضاء المشاركين ؟	في أي تخفيضات للناس المشاركين؟	في أي تخفيظات للأعظاء المشاركين؟	ثمة	أي	أعضاء	أعظاء
4219	corpus-6-test-corpus-26-train	MSA	هل هناك قطار فائق السرعة في التاسعة والنصف ؟	في قطار سريع الساعة تسعة ونص؟	في قطار سريع الساعة تسعة ونص؟	فائق السرعة	سريع	تاسعة	تسعة
4221	corpus-6-test-corpus-26-train	MSA	دعني افحص سائل الفرامل والمحرك . يبدو أن محرك سيارتك قد أوشك علي التوقف .	خليني أشيك على زيت البريكات عند الموتور. موتورك شكله تقريباً معطل.	خليني أشيك على زيت البريكات و الماتور. ماتور سيارتك شكله بآخر أنفاسه.	أفحص	أشيك	فرامل	بريكات	محرك السيارة:ماتور
4224	corpus-6-test-corpus-26-train	MSA	لم يكن خطئي .	ما كان غلطي.	ما كان غلطي.	خطأ	غلط
4262	corpus-6-test-corpus-26-train	MSA	لا كهرباء .	ما في كهربا.	ما في كهربا.	كهرباء	كهربا
4263	corpus-6-test-corpus-26-train	MSA	سوف أبلغ الشرطة بذلك .	راح أبلغ عن هاد للشرطة.	راح أبلغ الشرطة بهاظ الإشي.
4269	corpus-6-test-corpus-26-train	MSA	هل سيحاسب كل واحد منا على مشروباته منفردا ؟	راح يكون على كل واحد يدفع عن اللي شربه؟	بده يحاسب كل واحد منا عطلبه لحال؟	منفردا	لحال
4275	corpus-6-test-corpus-26-train	MSA	في أي مكان من ثلاثين حتى خمسين دولارا لليلة .	ايش في مكان من ثلاثين لخمسين دولار لكل ليلة.	بأي مكان من ثلاثين لخمسين دولار لليلة.
4278	corpus-6-test-corpus-26-train	MSA	من فضلك ، اصلح هذه .	لو سمحت زبط هاد.	لو سمحت صلح هاذا.	اصلح	صلح
4284	corpus-6-test-corpus-26-train	MSA	في أيام السنة الجديدة . وفي مناسبات خاصة مثل حفلات الزواج ومراسم منح الجوائز أو في العزاء .	في ايام السنة الجديدة. وفي مناسبات خاصة مثل حفلات الأعراس و توزيع الجوائزأو العزا.	بايام السنة الجديدة .و مناسبات خاصة مثل حفلات الأعراس و توزيع الجوائز أو العزا.	حفلات الزواج	أعراس	منح	توزيع
4285	corpus-6-test-corpus-26-test	MSA	المزيد من المستردة ، من فضلك .	كثرلي خردل، لو سمحت.	كثرلي ماسترد، لو سمحت.	مستردة	ماسترد
4305	corpus-6-test-corpus-26-train	MSA	لماذا لا تعطيها هدية ؟	ليش ما تعطيها هدية؟	ليش ما تعطيها هدية؟	لماذا	ليش
4321	corpus-6-test-corpus-26-test	MSA	أي فيلم توصي به ؟	أي فيلم بتنصحني فيه؟	أي فلم بتنصحني فيه؟	توصي	بتنصحني
4324	corpus-6-test-corpus-26-test	MSA	هاك عشرين دولارا واعطني فكة دولارين من فضلك .	هي عشرين وأعطيني دولارين الباقي، لو سمحت.	هاك عشرين دولر وأعطيني صرافة دولرين ، لو سمحت.	فكة	صرافة
4326	corpus-6-test-corpus-26-train	MSA	لقد انتقدتني ضمنا .	ضربتني من الجنب.	معنى حكيك إنك بتنقدني .	ضمنا	معنى
4335	corpus-6-test-corpus-26-train	MSA	يمكن أن أحضر في الساعة الثانية .	ممكن آجي على الساعة ثنتين.	ممكن آجي على الساعة ثنتين.	الثانية	ثنتين	أحضر	آجي
4341	corpus-6-test-corpus-26-train	MSA	هل هذه هي حقائب الرحلة جال صفر واحد ؟	هي هاي شناتي اللي من رحلة الطيران جيه ايه إل صفر واحد؟	هي هاي شناتي الرحلة صفر واحد؟	حقائب	شناتي
4346	corpus-6-test-corpus-26-train	MSA	هذه هي رحلتي الأولى إلى باريس .	هاي رحلتي الأولى لباريس.	هاي رحلتي الأولى لباريس.
4348	corpus-6-test-corpus-26-train	MSA	هل لك أن تقدر التكلفة قبل أن تبدأ العمل فيها ؟	بتقدر تقدر قديش بكلف قبل ما تبدا شغل فيه؟	ممكن تقدر قديش بكلف قبل ما تبدا شغل فيه؟	تبدأ	تبدا	عمل	شغل
4358	corpus-6-test-corpus-26-train	MSA	تعالى ، من فضلك .	تفضل، لو سمحت.	تعال، لو سمحت.
4364	corpus-6-test-corpus-26-test	MSA	رحلتنا للتخييم يجب أن تكون ممتعة .	رحلة التخييم تبعتنا لازم تكون كثير ممتعة.	رحلة التخييم تبعتنا لازم تكون مرتبة.	ممتعة	مرتبة
4365	corpus-6-test-corpus-26-train	MSA	متي سنستقل القارب ؟	متى بدنا نركب القارب؟	متى بدنا نركب القارب؟	نستقل	نركب
4373	corpus-6-test-corpus-26-train	MSA	ليس لدينا حقيبة لمثل هذه الكمية ولذلك سأضعها في هذه الحقيبة البلاستيكية الكبيرة .	ما عنا شنتة توسع كل هاي الكمية عشان هيك راح أحطها في هاي الشنتة البلاستيك الكبيرة .	ما عنا شنتة توسع كل هاي الكمية عشان هيك راح أحطها بهاي الشنتة البلاستيك الكبيرة .	تتسع	توسع	لذلك	عشان هيك
4374	corpus-6-test-corpus-26-train	MSA	أود لعب التنس .	بدي ألعب تنس.	بدي ألعب تنس.	أود	بدي
4375	corpus-6-test-corpus-26-train	MSA	يوجد عصير أناناس وبرتقال وطماطم .	في عصير أناناس و برتقال و بندورة.	في عصير أناناس و برتقال و بندورة.	طماطم	بندورة
4377	corpus-6-test-corpus-26-train	MSA	الجانب الأيسر من هذه الدور بجوار المصعد .	الجهة اليسار من هاد الطابق قريب من الاصنصير.	الجهة اليسار من هاذ الطابق جنب الاصنصير.	دور	طابق	الأيسر	اليسار
4382	corpus-6-test-corpus-26-test	MSA	ماذا سيعرض في قاعة الحفلات الموسيقية اليوم ؟	شو راح ينعزف بقاعة الحفلات الموسيقية اليوم؟	شو راح ينعزف بقاعة الحفلات الموسيقية اليوم؟
4409	corpus-6-test-corpus-26-train	MSA	ما رأيك في مشاهدة فيلم آخر ؟	شو رأيك نشوف فيلم ثاني؟	شو رأيك نشوف فيلم ثاني؟	آخر	ثاني
4418	corpus-6-test-corpus-26-train	MSA	من فضلك ، بدلي شيك المسافرين إلي نقود .	لو سمحت اصرفلي هاد الشيك السياحي كاش.	لو سمحت اصرفلي هاد الشك السياحي كاش.	بدل	اصرف	شيك	شك	نقود : كاش
4432	corpus-6-test-corpus-26-dev	MSA	من فضلك ، أريد أن أخذ نفس الدورة غدا .	لو سمحت ، بدي آخد نفس الدورة بكرا.	لو سمحت ، بدي آخذ نفس الدورة بكرا.	غدا	بكرا
4450	corpus-6-test-corpus-26-train	MSA	ربما أعطيك إجابة أفضل من تلك بعد عرضين .	أنا ممكن أقدر أعطيك جواب أحسن من هاد بعد ما أشوفه مرتين.	يمكن أعطيك جواب أحسن من هاذ بعد ما أشوفه مرتين.	إجابة	جواب	ربما	يمكن
4451	corpus-6-test-corpus-26-test	MSA	أريد هدية بمناسبة الذكرى السنوية .	بدي هدية لمناسبة الذكرى السنوية.	بدي هدية لمناسبة الذكرى السنوية.	أريد	بدي
4464	corpus-6-test-corpus-26-train	MSA	ما هي المسرحيات الموسيقية المعروضة حاليا ؟	شو في مسرحيات موسيقية معروضة هسا؟	شو في مسرحيات موسيقية معروضة هسا؟	حاليا	هسا
4475	corpus-6-test-corpus-26-train	MSA	هل لديك مرآة ؟	عندك مراية؟	عندك مراية؟	مرآة	مراية
4478	corpus-6-test-corpus-26-dev	MSA	عذرا ، ولكني ضللك طريقي . هل لك أن تساعدني ؟	لو سمحت، أنا ضيعت طريقي. ممكن تساعدني؟	معلش ، بس ضيعت طريقي. ممكن تساعدني؟	ضللت	ضيعت	عذرا	معلش
4479	corpus-6-test-corpus-26-train	MSA	سوف آخذ هذه ، من فضلك .	راح آخد هاد، لو سمحت.	راح آخذ هاظ ، لو سمحت.	سوف	راح
4497	corpus-6-test-corpus-26-train	MSA	لا يمكنك جلب الألعاب النارية إلى كندا .	ما بتقدر تجيب ألعاب نارية على كندا.	ما بتقدر تجيب ألعاب نارية على كندا.	تجلب	تجيب
4501	corpus-6-test-corpus-26-train	MSA	ما أروع زوجتك من طاهية .	قديش مرتك طباخة ممتازة.	قديش مرتك طباخة ممتازة.	طاهية	طباخة	زوجتك	مرتك
4503	corpus-6-test-corpus-26-train	MSA	هل تريد أي مساعدة ؟	بدك أي مساعدة؟	بدك أي مساعدة؟	تريد	بدك
4505	corpus-6-test-corpus-26-train	MSA	هلا حجزت لي تاكسي الساعة السادسة صباح غد , من فضلك ؟	ممكن تعمل حجز لتاكسي الساعة ستة بكرا الصبح، لو سمحت؟	ممكن تحجزلي تكسي الساعة ستة الصبح لبكرا ، لو سمحت؟	هلا	ممكن
4510	corpus-6-test-corpus-26-train	MSA	ماذا تفضل مع طبقك الرئيسي .	شو بتحب مع طبقك الرئيسي؟	شو بتحب مع الطبق الرئيسي؟	تفضل	بتحب
4540	corpus-6-test-corpus-26-test	MSA	هل يوجد بوتيك قريب من هنا ؟	في بوتيك قريب من هون؟	في بوتيك قريب من هون؟
4549	corpus-6-test-corpus-26-train	MSA	هذا المكان مكتظ بالناسب ، أليس كذلك ؟	هاد المكان معبى ناس، مش هيك؟	هاظ المكان معبى ناس، مش هيك؟	مكتظ	معبى
4558	corpus-6-test-corpus-26-train	MSA	عفواً . ستكون جاهزة في غضون خمس دقائق .	آسف. راح تكون جاهزة خلال خمس دقايق.	عفوا. رح تكون جاهزة خلال خمس دقايق.	في غضون	خلال
4588	corpus-6-test-corpus-26-train	MSA	عانيت من ألم في الرقبة أثناء نومي ؟	صارت رقبتي توجعني وأنا نايم.	صارت رقبتي توجعني وأنا نايم.	نائم	نايم
4594	corpus-6-test-corpus-26-train	MSA	نعم ، لا توجد مشكلة . هل من الممكن أن أرى جواز سفرك ؟	طيب، ما في مشكلة. ممكن أشوف جواز سفرك؟	نعم، ما في مشكلة. ممكن أشوف جواز سفرك؟
4615	corpus-6-test-corpus-26-test	MSA	لا امتلك أي نقود .	ما معي مصاري.	ما معي مصاري.	أمتلك	معي
4624	corpus-6-test-corpus-26-train	MSA	متى يتعين علي أن أكون في المحطة ؟	أي وقت لازم أكون بالمحطة؟	أي وقت لازم أكون بالمحطة؟	يتعين علي	لازم
4630	corpus-6-test-corpus-26-train	MSA	هناك مطاعم كثيرة قريبة من هنا .	في كثير مطاعم بالمنطقة.	في كثير مطاعم بالمنطقة.
4635	corpus-6-test-corpus-26-train	MSA	بجوار حجرة الإيداع .	جنب غرفة الامانات.	جنب غرفة الأمانات.	حجرة	غرفة
4640	corpus-6-test-corpus-26-train	MSA	إنه لمن دواعي السرور أن أتحدث معك .	انبسطت بالحكي معك.	إنسريت بالحكي معك.	سررت	إنسريت
4644	corpus-6-test-corpus-26-test	MSA	هل هناك جولة بعد الظهر ؟	في رحلة بعد الظهر؟	في لفة بعد الظهر؟	جولة	لفة
4648	corpus-6-test-corpus-26-test	MSA	إنني مع أصدقائي .	أنا مع اصحابي.	أني مع صحابي.	أصدقائي	صحابي
4653	corpus-6-test-corpus-26-train	MSA	لقد تمتعت بإقامتي . شكراً لك .	انبسطت بقعدتي. شكراً الك.	انبسطت بإقامتي . شكراً الك.	تمتعت	انبسطت
4654	corpus-6-test-corpus-26-train	MSA	الشاطئ أسفل يمينا . ياله من منظر رائع .	الشط تحت على اليمين. شو المنظر بجنن.	الشط تحت على اليمين. شو المنظر بجنن.	رائع	بجنن	أسفل	تحت
4658	corpus-6-test-corpus-26-train	MSA	شكراً لك على الانتظار ، يا أستاذه مكجوير . هاك هو . امض من فضلك .	شكراً لأنك استنيتي، آنسة مكجوير. هيو هون. وقعي لو سمحتي.	شكراً لإنك استنيتي، آنسة مكجوير. هيو هون. وقعي لو سمحتي.	امض	وقع	أستاذة	آنسة
4662	corpus-6-test-corpus-26-train	MSA	هل لديك أي صورة لبطاقة هوية ؟	عندك اي صورة لبطاقة الهوية؟	عندك اي صورة للهوية؟
4671	corpus-6-test-corpus-26-train	MSA	سبعاً ، من فضلك .	سبعة، لو سمحت.	سبعة، لو سمحت.	سبعاً	سبعة
4674	corpus-6-test-corpus-26-train	MSA	أريد أن أرسل هذا إلى المغسلة . متى ستكون جاهزة ؟	بدي أبعث هاد للمغسلة. متى بكون جاهز؟	بدي أودي هاذ للمغسلة. متى بكون جاهز؟	أرسل	أودي
4685	corpus-6-test-corpus-26-train	MSA	لقد خلعت البنطلون .	غيرت البنطلون.	شلحت البنطلون.	خلعت	شلحت
4699	corpus-6-test-corpus-26-train	MSA	نعم . تم نقل أمتعة شخص آخر إلى غرفتي تواً . من فضلك ، هل من الممكن أن تقوم بفحصها ؟	اه، شناتي حدا ثاني وصلت غرفتي هسا.لو سمحت، ممكن تشوفها؟	اه، في شناتي لحدا ثاني وصلت غرفتي هسا.لو سمحت، ممكن تشوفها؟	تواً	هسا	تفحص	تشوف
4714	corpus-6-test-corpus-26-train	MSA	هل من الممكن أن تفصل أكثر ؟	يتقدر تشرح بشكل مفصل ؟	يتقدر توضح أكثر ؟	تفصل	توضح
4729	corpus-6-test-corpus-26-train	MSA	هل استرحت في نومك ؟	ارتحت بالنومة؟	ارتحت بالنومة؟	استرحت	ارتحت
4733	corpus-6-test-corpus-26-train	MSA	هلا ضغطت على زر مصراع النافذة ؟	ممكن تكبس كبسة الشباك؟	ممكن تكبس كبسة الشباك؟	تضغط	تكبس	زر	كبسة
4740	corpus-6-test-corpus-26-train	MSA	مفتاحين من فضلك ؟	مفتاحين، لو سمحت.	مفتاحين لو سمحت.
4742	corpus-6-test-corpus-26-dev	MSA	أريد مصباحاً .	بدي لمبة.	بدي لمبة.	مصباح	لمبة
4744	corpus-6-test-corpus-26-train	MSA	في نهاية الممر .	موجود عند آخر الممر.	بنهاية الممر.	في	ب
4773	corpus-6-test-corpus-26-dev	MSA	أرغب في الحصول على بعض ورق الرسائل .	بدي شوية ورق رسائل.	بدي شوية ورق رسائل.	أرغب	بدي
4788	corpus-6-test-corpus-26-train	MSA	هل سنذهب بالحافلة ؟	راح نروح بالباص؟	راح نروح بالباص؟	نذهب	نروح	حافلة	باص
4790	corpus-6-test-corpus-26-train	MSA	هل قلت إنك ستغادر إلى طوكيو غدا ؟	انت حكيت انك رايح على طوكيو بكرا؟	قلت إنك رايح على طوكيو بكرا؟	تغادر	رايح
4795	corpus-6-test-corpus-26-test	MSA	دعني أنام حتى التاسعة .	خليني نايم للساعة تسعة.	خليني نايم للساعة تسعة.	دعني	خليني	تاسعة	تسعة
4801	corpus-6-test-corpus-26-train	MSA	يجب أن أنتقل إلى عربة مكيفة واحد صفر صفر . هل هذا ممكن ؟	بدي انتقل لعرباية مكيفة واحد صفر صفر. ممكن؟	بدي انتقل لعرباية مكيفة واحد صفر صفر. ممكن؟	عربة	عرباية
4813	corpus-6-test-corpus-26-train	MSA	كيف حال اللعب معك هذه الأيام ؟	كيف اللعب معك هاي الأيام؟	كيف اللعب معك هاي الايام؟	هذه	هاي
4814	corpus-6-test-corpus-26-dev	MSA	أشعر بضيق في الصدر .	حاسس صدري مخنوق.	حاس بخنقة بصدري.	أشعر	حاس	ضيق	خنقة
4826	corpus-6-test-corpus-26-train	MSA	لا توجد مشكلة . إذا حضرت في الخامس من سبتمبر ، فسيكون بإمكانك الاستمتاع بعرض فيلم علمي لأن عندنا يوماً خاصاً مفتوحاً أول يوم جمعة من كل شهر .	ما في مشكلة. اذا اجيت بخمسة سبتمبر، بتقدر تستمتع بعرض فيلم علمي لأنه احنا عنا يوم مميز مفتوح بأول جمعة من كل شهر.	ما في مشكلة. اذا اجيت بخمسة تسعة ، بتقدر تستمتع بالفلم العلمي لأنه احنا عنا يوم مميز مفتوح بأول جمعة من كل شهر.	حضرت	اجيت	سبتمبر	تسعة
4828	corpus-6-test-corpus-26-train	MSA	هل لديكم أية جولة سياحية أخرى ؟	عندك أي رحلات ثانية؟	عندك أي رحلة ثانية؟	جولة	رحلة
4836	corpus-6-test-corpus-26-train	MSA	حسنا . خصم خمسة في المائة . هل يوافقك لك ؟	طيب، خصم خمسة بالمية. بمشي معك؟	ماشي ، خصم خمسة بالمية. بمشي معك؟	يوافقك	بمشي	حسنا	ماشي
4845	corpus-6-test-corpus-26-train	MSA	إنني ذاهب إلى باريس .	أنا رايح على باريس.	أناي رايح على باريس.	ذاهب	رايح
4848	corpus-6-test-corpus-26-train	MSA	إنها ليست أحدث طراز ، أليس كذلك ؟	هاي مش الموديل الأخير، صح؟	هاي مش أحدث موديل ، صح؟	طراز	موديل	أليس كذلك	صح
4857	corpus-6-test-corpus-26-train	MSA	موعده المقرر هو الثامنة والنصف مساءْ بالتوقيت المحلي .	موعده الساعة ثمنية ونص المسا بالتوقيت المحلي.	موعده هو الساعة ثمنية ونص المسا بالتوقيت المحلي.	ثامنة	ثمنية
4889	corpus-6-test-corpus-26-train	MSA	أظهر هذا المبنى معنا , من فضلك .	بين هاد المبنى معنا، لو سمحت.	بين هاظ المبنى معنا، لو سمحت.	أظهر	بين
4894	corpus-6-test-corpus-26-train	MSA	حسناً . أريد سلطانية من الحجم المتوسط ، وكرات الأرز .	طيب. بدي اخد سلطانية حجم وسط و طابة رز.	طيب. بدي سلطانية حجم وسط وكرات الرز.	متوسط	وسط	أرز	رز
4901	corpus-6-test-corpus-26-train	MSA	كيف يبدو هذا ؟	كيف شكله؟	كيف شكله؟	يبدو	شكله
4924	corpus-6-test-corpus-26-train	MSA	أريد أن أرى ذاك الذي في نافذة العرض ، من فضلك .	بدي أشوف هاد الموجود على العرض، لو سمحت.	بدي أشوف هاذ الموجود بالواجهة، لو سمحت.	ذاك	هاذ
4945	corpus-6-test-corpus-26-train	MSA	مستحيل . نحن في إجازة . إنني أرفض الجلوس في غرفة بالفندق ومشاهدة البيسبول في التلفاز . أريد الذهاب لمشاهدة مسرحية .	مستحيل. احنا في اجازة. أنا ما بدي أقعد بغرفة الفندق اشوف البيسبول في التلفزيون. بدي أروح أحضر مسرحية.	مستحيل. احنا بإجازة. أنا ما بدي أقعد بغرفة بالفندق اشوف البيسبول بالتلفزيون. بدي أروح أحظر مسرحية.	أشاهد	أحظر	أجلس	أقعد
4957	corpus-6-test-corpus-26-train	MSA	هل بإمكاني اللمس ؟	بقدر ألمسه؟	بقدر ألمسه؟
4974	corpus-6-test-corpus-26-train	MSA	أيمكنك الحضور إلى هنا لإصلاحه ؟	ممكن تيجي هون عشان اتصلحه؟	ممكن تيجي هون عشان اتصلحه؟	تصلح	اتصلح
4983	corpus-6-test-corpus-26-train	MSA	أريد بعض الألياف الصناعية .	بدي شوية ألياف اصطناعية.	بدي شوية ألياف اصطناعية.
4985	corpus-6-test-corpus-26-train	MSA	اسمي " تارو تاناكا " لدي حجز مسبق .	اسمي " تارو تاناكا " عندي حجز.	اسمي " تارو تاناكا " عندي حجز من قبل.	مسبق	من قبل
4990	corpus-6-test-corpus-26-train	MSA	أريد بعضاً من كريم التنظيف .	بدي شوية كريم منظف.	بدي شوية كريم تنظيف.	بعضاً	شوي
5004	corpus-6-test-corpus-26-train	MSA	أريد رداءا ذات أكمام طويلة .	بدي جاكيت كم طويل.	بدي جاكيت كم طويل.	رداء	جاكيت
5009	corpus-6-test-corpus-26-train	MSA	لقد سُرقت حقيبتي .	أنا انسرقت شنتيتي.	انسرقت شنتتي.	سرقت	انسرقت
5017	corpus-6-test-corpus-26-train	MSA	لقد تقابلنا بالصدفة لعدة مرات ، أليس كذلك ؟	شفنا بعض بالصدفة اكثر من مرة ، مش هيك؟	تقابلنا بالصدفة عدة مرات ، مش هيك؟
5035	corpus-6-test-corpus-26-train	MSA	هل يمكنني أن ألقي نظرةً أخرى على قائمة الطعام ؟	ممكن أشوف قائمة الاكل مرة ثانية؟	ممكن أشوف المنيو مرة ثانية؟	ألقي نظرة	أشوف			قائمة الطعام: منيو
5045	corpus-6-test-corpus-26-train	MSA	لا تزال تبدو عليهم علامات المرض وشحوبة الوجه .	لسا مبين عليهم علامات المرض و وجههم اصفر.	بعده مبين عليهم علامات المرض و وجوهم شاحب.	تبدو	مبين	لا تزال	بعده
5082	corpus-6-test-corpus-26-train	MSA	كم عددها ؟	قديش العدد؟	كم عددها ؟
5083	corpus-6-test-corpus-26-train	MSA	فراولة ، من فضلك .	فراولة، لو سمحت.	فراولة، لو سمحت.
5090	corpus-6-test-corpus-26-dev	MSA	قمة جبل " فوجي " هي اعلي قمة جبلية في اليابان حيث يبلغ ارتفاعها ثلاثة آلاف وسبعمائة وستون مترا .	جبل فوجي هو أعلى قمة باليابان على ارتفاع ثلاثة ألاف وسبعمية وستين متر.	جبل فوجي هو أعلى قمة باليابان على ارتفاع ثلاثة ألاف وسبعمية وستين متر.
5091	corpus-6-test-corpus-26-train	MSA	لا ، ليس بعد ، هناك الكثير نختار فيه .	لا، لسا. في كثيرعشان تختار منه.	لا، بعده ، في كثير عشان تنقي منه	تختار	تنقي
5098	corpus-6-test-corpus-26-dev	MSA	أرغب في كريم مسائي للبشرة .	بدي كريم ليلي للبشرة.	بدي كريم ليلي للبشرة.	مسائي	ليلي
5104	corpus-6-test-corpus-26-test	MSA	إنها بين المخبز ومحل الجزارة .	موجود بين المخبز والملحمة.	موجودة بين المخبز والملحمة.	محل الجزارة	ملحمة
5116	corpus-6-test-corpus-26-train	MSA	هل لك أن تقصّر الأكمام ؟	بتقدر تقصر أكمامه؟	ممكن تقصر الكمام؟	الأكمام	الكمام
5117	corpus-6-test-corpus-26-train	MSA	أخشى أن لا يكون هنا أية دورة لتعليم الجولف .	خايف ما يكون في دورة لتعليم الجولف	خايف ما يكون في دورة لتعليم الجولف	أخشى	خايف
5121	corpus-6-test-corpus-26-train	MSA	هل لك أن تريني الخاتم الثاني من جهة اليسار ؟	ممكن تفرجيني الخاتم الثاني يلي من جهة اليسار؟	ممكن تفرجيني الخاتم الثاني يلي من جهة اليسار؟	تريني	تفرجيني
5124	corpus-6-test-corpus-26-train	MSA	ألا تسأله أن يتصل بي ؟	بتقدر تحكيله يتصل في؟	بتقدر تحكيله يتصل فيّ؟	بي	فيّ
5138	corpus-6-test-corpus-26-train	MSA	لقد حاولت إجراء مكالمة دولية ، هل نجح ذلك معك من قبل ؟	جربت تتصل مكالمة دولية. زبطت معك قبل هيك؟	جربت أعمل مكالمة دولية. زبطت معك قبل هيك؟	نجح	زبط	أجري	أعمل
5148	corpus-6-test-corpus-26-test	MSA	هذا خطأ .	هاد غلط.	هاظ غلط.	هذا	هاظ
5175	corpus-6-test-corpus-26-train	MSA	نعم ، هي ، لأنك تستطيع أن ترى العلم أمام مكتب البريد .	صح، هو هيك. لأنه بتقدر تشوف العلم مقابل مكتب البريد.	صح، هي . لأنه بتقدر تشوف العلم قدام مكتب البريد.	نعم	صح	أمام	قدام
5207	corpus-6-test-corpus-26-test	MSA	بالتأكيد سوف ترسلهم ، أليس كذلك ؟	أكيد راح تبعتهم، صح؟	أكيد راح تبعتثم، صح؟	ترسلهم	تبعثهم
5219	corpus-6-test-corpus-26-train	MSA	أود إجراء مكالمة هاتفية باستخدام بطاقة ائتمان .	بدي أعمل مكالمة عن طريق بطاقة البنك.	بدي أعمل مكالمة عن طريق الفيزا.	باستخدام	عن طريق
5224	corpus-6-test-corpus-26-train	MSA	أريد ما يخصني لكي أرحل .	بدي اغراضي مشان أروح.	بدي اللي بخصني مشان أروح.	لكي	مشان	أرحل	أروح
5245	corpus-6-test-corpus-26-train	MSA	لدي وصولها ، سوف ندفع ثمن شحنها إلى عنوان منزلك .	لما توصل. راح ندفع حق الشحن لعنوان بيتك.	لما توصل. راح ندفع حق الشحن لعنوان بيتك.	منزلك	بيتك	لدى	لما
5246	corpus-6-test-corpus-26-dev	MSA	هذه الأيام ، استخدم الكمبيوتر بشكل دائم في العمل .	هاي الأيام أنا بستخدم الكمبيوتر بشكل يومي بالشغل.	هاي الأيام ، أنا بستخدم الكمبيوتر دايماً بالشغل.	دائماً	دايماً
5250	corpus-6-test-corpus-26-train	MSA	أوه ! موافق ، لقد فهمت ، سوف آتي إلى مكانك .	أووه، طيب. فهمت. راح آجي عندك.	أووه، طيب. فهمت. راح آجي عندك.	موافق	طيب
5259	corpus-6-test-corpus-26-train	MSA	لا ، هذا يكفي .	لا، هيك بكفي.	لا، هاذ بكفي.	يكفي	بكفي
5261	corpus-6-test-corpus-26-train	MSA	هل لي أن آخذ بطانية ووسادة ؟	ممكن آخد حرام و مخدة ؟	ممكن آخذ حرام و مخدة ؟	بطانية	حرام	وسادة	مخدة
5262	corpus-6-test-corpus-26-train	MSA	هل يمكنك أن تحضر هنا قريباً بقدر المستطاع ، من فضلك ؟	ممكن تيجي هون بأسرع وقت، لو سمحت؟	بتقدر تيجي هون بأسرع وقت، لو سمحت؟	يمكنك	بتقدر	تحضر	تيجي
5263	corpus-6-test-corpus-26-train	MSA	قدحاً من القهوة , من فضلك .	فنجان قهوة، لو سمحت.	فنجان قهوة، لو سمحت.	قدح	فنجان
5267	corpus-6-test-corpus-26-test	MSA	ابحث عن كروت لمناظر تعكس طبيعة جزر هاواي .	عم بدور على بطاقات بتعبر عن طبيعة جزر هاواي.	بدور على كروت لمنظر بتبين طبيعة جزر هاواي.	تعكس	بتبين
5272	corpus-6-test-corpus-26-train	MSA	هل لك بأن تضيق منطقة الوسط سنتيمترات ؟	ممكن تضيقلي الخصر كم سانتي؟	ممكن تظيقلي الخصر كم صانتي؟	منطقة الوسط	الخصر	سنتيمتر	صانتي
5289	corpus-6-test-corpus-26-train	MSA	إنني في نفس السن .	أنا بنفس العمر.	أني بنفس العمر.	سن	عمر
5300	corpus-6-test-corpus-26-train	MSA	ألا تحضر لي بعض القهوة ؟	ممكن تجبلي قهوة؟	ممكن تجبلي قهوة؟
5307	corpus-6-test-corpus-26-dev	MSA	ثلاث مائة وخمسون دولارا ؟ إن هذا يفوق ميزانيتي .	ثلاثمية وخمسين دولار؟ هاد أعلى من ميزانيتي.	ثلاثمية وخمسين دولار؟ هاظا أعلى من ميزانيتي.	يفوق	أعلى
5323	corpus-6-test-corpus-26-train	MSA	هل نحتاج إلى طرح هذا للتصويت ؟ إن لم نكن في حاجة إلى هذا ، فإمكاني أن أعتقد حينئذ أننا قد وصلنا إلى نتيجة , سأقوم بإرسالها إلى مجلس إدارتنا صباح غد .	هل احنا محتاجين نحطه للتصويت؟ اذا لأ، بتوقع أنه وصلنا للنتيجة، بدي أبعثها لمجلس ادارتنا بكرا الصبح.	هل احنا محتاجين نحط هاظ للتصويت؟ اذا لأ، بتوقع أنه وصلنا للنتيجة، بدي أبعثها لمجلس ادارتنا بكرا الصبح.	نطرح	نحط
5334	corpus-6-test-corpus-26-train	MSA	هل تعرف ما إذا كان هناك أي فنادق رخيصة الأسعار ؟	بتعرف اذا في أي فنادق رخيصة؟	بتعرف اذا في أي فنادق رخيصة؟
5361	corpus-6-test-corpus-26-train	MSA	صباح الخير . هل استرحت في نومك ؟	صباح الخير. ارتحت بنومتك ؟	صباح الخير. ارتحت بنومتك ؟	استرحت	ارتحت
5364	corpus-6-test-corpus-26-train	MSA	ماذا تنوي أن تفعل عقب الانتهاء من المدرسة . ؟	شو بتخطط تعمل بعد ما تخلص مدرسة؟	شو بتخطط تعمل بعد ما تخلص مدرسة؟
5366	corpus-6-test-corpus-26-train	MSA	سرقت حقيبتي في الشارع .	انسرقت شنتيتي بالشارع.	انسرقت شنتي بالشارع.	حقيبتي	شنتي
5367	corpus-6-test-corpus-26-train	MSA	هل كان لديك أية خدمات أخرى إلى جانب طعام الإفطار هذا الصباح ؟	في عندك أي خدمات ثانية غير فطور الصبح؟	في عندك أي خدمات ثانية غير فطور الصبح؟	إفطار	فطور	إلى جانب	غير
5407	corpus-6-test-corpus-26-train	MSA	من فضلك ، أريد فنجاناً من القهوة البيضاء .	لو سمحت ، بدي قهوة بالحليب.	لو سمحت ، بدي فنجان قهوة بالحليب.	من فضلك	لو سمحت
5410	corpus-6-test-corpus-26-test	MSA	وهو كذلك . هل فندق شيراتون قريب من هناك ؟	طيب. فندق الشيراتون بالمنطقة هون؟	وهو هيك . فندق الشيراتون قريب من هناك؟
5411	corpus-6-test-corpus-26-train	MSA	أتمنى ألا تكون متعبا جدا .	بتمنى تكون مش كثير تعبان.	بتمنى ما تكون كثير تعبان.	منعب	تعبان	ألا	ما
5431	corpus-6-test-corpus-26-train	MSA	أبغي تأجير سيارة من هذا الطراز لمدة يومين .	بدي استأجر سيارة من هاد النوع لمدة يومين.	بدي استأجر سيارة من هاذ الموديل لمدة يومين.	أبغي	بدي			طراز :موديل
5436	corpus-6-test-corpus-26-train	MSA	سآخذ صورة لجاك دانيلز .	راح آخد صورة لجاك دانيلز.	راح آخذ صورة لجاك دانيلز.
5437	corpus-6-test-corpus-26-train	MSA	أريد كيساً من الفشار ، من فضلك .	بدي كيس بوشار، لو سمحت.	بدي كيس بوشار، لو سمحت.	فشار	بوشار
5447	corpus-6-test-corpus-26-train	MSA	سقط مني واحدا من عصى التزلج .	وقعت مني عصاية من عصي التزلج.	وقعت مني عصاية من عصي التزلج.	سقطت	وقعت	عصى	عصي
5455	corpus-6-test-corpus-26-train	MSA	نحن لا نجلب أية هدايا إلى الحفل ، وبدلا من ذلك يحضر الضيوف أموالاً نقدية .	احنا ما مناخد هدايا على الحفلة، بدالهم الضيوف بجيبو مصاري.	إحنا ما منجيب أي هدايا عالحفلة، بدال هيك الضيوف بجيبو مصاري.	حفل	حفلة	بدلاً	بدال
5458	corpus-6-test-corpus-26-train	MSA	أود أن أرسله عن طريق البريد .	حابب أبعثه عن طريق البريد.	حاب أبعثه عن طريق البريد.	أود	حاب
5492	corpus-6-test-corpus-26-train	MSA	وصلت الطائرة متأخرة بسبب الثلج الكثيف .	وصلت الطيارة متأخرة عشان الثلوج القوية.	وصلت الطيارة متأخرة عشان الثلج كان كثيف.	بسبب	عشان
5518	corpus-6-test-corpus-26-train	MSA	الفاتورة من فضلك ؟	الحساب، لو سمحت.	الفاتورة لو سمحت.
5521	corpus-6-test-corpus-26-train	MSA	من فضلك هل يمكنك أن تتلقى رسالة ؟	لو سمحت، ممكن تاخد رسالة؟	لو سمحت بتقدر تستقبل رسالة؟	تتلقى	تستقبل
5540	corpus-6-test-corpus-26-train	MSA	آسف ، لا يمكنني متابعتك . هل من الممكن أن تتحدث ببطء أكثر من فضلك .	عفواً، مش قادر أتبع معك. ممكن تحكي ابطأ شوي، لو سمحت؟	عفواً، مش قادر أتبع معك. ممكن تحكي ابطأ شوي، لو سمحت؟	تتحدث	تحكي
5549	corpus-6-test-corpus-26-dev	MSA	ماذا يمكنني أن أريك ؟	شو ممكن أورجيك؟	شو بقدر أورجيك؟	يمكنني	بقدر	أريك	أورجيك
5559	corpus-6-test-corpus-26-train	MSA	هل يمكنني أن التقط بعض الصور ؟	ممكن اصور شوية صور؟	ممكن اوخذ شوية صور؟	ألتقط	اوخذ
5570	corpus-6-test-corpus-26-train	MSA	من مائة .	من مية.	من مية.	مائة	مية
5584	corpus-6-test-corpus-26-dev	MSA	رقم الرحلة الجوية اتش بي تسعة وثمانين المتجهة إلى طوكيو في الحادي عشر من مارس .	رحلة الطيران رقم إتش بي تسعة و ثمانين رايحة لطوكيو في احدعش مارس.	رقم الرحلة الجوية إتش بي تسعة و ثمانين رايحة لطوكيو في احدعش ثلاث.	متجهة	رايحة
5585	corpus-6-test-corpus-26-train	MSA	هل بإمكاني الحصول على طبق آخر مثل هذا ؟	ممكن آخد صحن ثاني نفس هاد؟	بقدر آخذ صحن ثاني مثل هاذ؟	طبق	صحن
5594	corpus-6-test-corpus-26-dev	MSA	هل لديك واحدة أخرى ؟	عندك واحدة تانية؟	عندك واحدة ثانية؟	لديك	عندك
5596	corpus-6-test-corpus-26-train	MSA	من فضلك ، احضر طعام الإفطار إلى غرفتي في السابعة من صباح الغد .	لو سمحت جبلي فطوري على غرفتي بكرا الساعة سبعة الصبح.	لو سمحت جبلي فطوري على غرفتي بكرا الساعة سبعة الصبح.	احضر	جيب	سابعة	سبعة
5615	corpus-6-test-corpus-26-train	MSA	عامل الصيانة سيصعد في الحال .	عامل الصيانة راح يطلع هسا.	عامل الصيانة راح يطلع مباشرة.	في الحال	مباشرة	يصعد	يطلع
5617	corpus-6-test-corpus-26-dev	MSA	آسف سأعود لاحقاً .	أنا آسف. راح أرجع بعدين.	آسف. راح أرجع بعدين.	أعود	أرجع	لاحقاً	بعدين
5640	corpus-6-test-corpus-26-test	MSA	كيف أستقلها ؟	كيف بقدر آخدها؟	كيف اركبهاا؟	أستقلها	اركبها
5648	corpus-6-test-corpus-26-train	MSA	هل هناك أماكن شاغرة بالنسبة لرحلة الخميس ؟	في أي شواغر برحلة يوم الخميس؟	في أماكن فاظية برحلة يوم الخميس؟	شاغرة	فاظية
5657	corpus-6-test-corpus-26-train	MSA	عفواً . هلا سمحت لي بالمرور ؟	عفواً. بقدر امر؟	عفواً. بتسمحلي أمر؟
5680	corpus-6-test-corpus-26-train	MSA	هل لديك أية نباتات أو فواكه ؟	في عندك أي خضار وفواكه؟	في عندك أي خضار أو فواكه؟	أية	أي
5684	corpus-6-test-corpus-26-train	MSA	من فضلك أخبرني كيف أملأ بطاقة النزول إلى البر ؟	لو سمحت ممكن تحكيلي كيف أعبي بطاقة النزول للبر؟	لو سمحت قلي كيف أعبي بطاقة النزول للبر؟	أخبرني	قلي	أملأ	أعبي
5695	corpus-6-test-corpus-26-train	MSA	أعتقد أن سيارتي تستحق حوالي خمسة آلاف دولارا .	أنا بتوقع سيارتي بتسوى حوالي خمس الآف دولار.	أنا بتوقع سيارتي بتسوى حوالي خمس الآف دولار.	تستحق	بتسوى
5706	corpus-6-test-corpus-26-train	MSA	هل هذا الطعام منخفض السعرات الحرارية ؟	هاد الأكل ما في كثير سعرات حرارية؟	هاذ الأكل قليل الكالوريز؟	طعام	أكل	منخفض	قليل	سعرات حرارية: كالوريز
5717	corpus-6-test-corpus-26-train	MSA	أية حافلة يجب أن آخذ إلى المحطة ؟	أي باص لازم أخد عشان أروح على المحطة؟	أي باص لازم أوخذ عشان أروح على المحطة؟	آخذ	أوخذ	يجب	لازم
5723	corpus-6-test-corpus-26-train	MSA	نعم , إنه هو . ولكن ستضطر إلى الدوران يسارا في إشارة المرور الثالثة وتستمر في ذلك الشارع حتى تصل إلى الطريق رقم ستة وستين .	نعم، هو. بس لازم تروح يسار من عند الاشارة الثالثة وتضلك بنفس الشارع لعند ما توصل طريق ستة وستين.	نعم، هيو. بس رح تظطر ادور يسار من عند الاشارة الثالثة وتظلك بنفس الشارع لعند ما توصل طريق ستة وستين.	تضطر	تظطر	تستمر	تظل
5733	corpus-6-test-corpus-26-dev	MSA	أريد كوبا من الماء لأتناول بعض الدواء , من فضلك .	بدي كاسة مي عشان آخد الدوا، لو سمحت.	بدي كاسة مي عشان اوخذ الدوا، لو سمحت.	كوب	كاسة	ماء	مي
5761	corpus-6-test-corpus-26-train	MSA	أكون ممتنا جدا لو أخذتني إلى الشاطئ .	راح أكون كثير شاكرة لو تاخدني لعند الشط.	راح أكون كثير ممنون لو توخذني لعند الشط.	ممتن	ممنون	أخذتني	توخذني
5772	corpus-6-test-corpus-26-train	MSA	آسف . لقد اتصلت بالرقم الخطأ . هذه وكالة تانكيوشا الصحفية .	أنا آسف. رنيت على الرقم الغلط. معك وكالة تانكيوشا الصحفية.	آسف. رنيت على الرقم الغلط. هاي وكالة تانكيوشا الصحفية.
5779	corpus-6-test-corpus-26-train	MSA	إننا سندفع الحساب ونغادر .	احنا بدنا ندفع الحساب و نطلع.	إحنا رح ندفع الحساب و نطلع.	نغادر	نطلع	إننا	إحنا
5830	corpus-6-test-corpus-26-dev	MSA	ما نوع هذه الموسيقى ؟	شو هاي الموسيقى؟	شو نوع هاي الموسيقى؟	هذه	هاي
5847	corpus-6-test-corpus-26-train	MSA	من فضلك أعط طفلك هذا الدواء الشراب , جرعة واحدة بعد كل وجبة .	لو سمحت أعطي هاد الدواء الشراب لطفلك، جرعة وحدة بعد كل وجبة.	لو سمحت إعطي هاذ الدوا الشراب لابنك، مرة وحدة بعد كل وجبة.	جرعة	مرة	أعط	إعطي
5848	corpus-6-test-corpus-26-train	MSA	هذا الموديل متوفر بمقاسات ثمانية وعشرين , وواحد وثلاثين وخمسة وثلاثين سنتيمترا .	هاد الموديل متوفر بمقاسات ثمانية وعشرين، و واحد و ثلاثين و خمسة و ثلاثين سانتي.	هاظ الموديل متوفر بمقاسات ثمنية وعشرين، و واحد و ثلاثين و خمسة و ثلاثين صانتي.	ثمانية	ثمنية
5875	corpus-6-test-corpus-26-train	MSA	أوه , يبدو كأنه قرعة .	أوه، هاد الصوت مألوف علي.	أوه، شكله قرعة .
5898	corpus-6-test-corpus-26-train	MSA	هل يمكن أن أستعمل هاتفك ؟	ممكن أستخدم تلفونك؟	بصير استعمل تلفونك؟	يمكن	بصير			هاتف: تلفون
5902	corpus-6-test-corpus-26-test	MSA	رائحته جميلة . كم ثمنه ؟	ريحته حلوة. قديش سعره؟	ريحته حلوة. قديش سعره؟	ثمنه	سعره	رائحته	ريحتة
5906	corpus-6-test-corpus-26-train	MSA	أريد أن أعيد التأكيد على رحلتي إلى شيكاغو في السابع عشر .	بدي أرجع اأكد على رحلتي الطيران لشيكاغو في سبعطعش الشهر.	بدي أرجع اأكد على رحلتي الطيران لشيكاغو في سبعطعش الشهر.	أعيد	أرجع	سابع عشر	سبعطعش
5913	corpus-6-test-corpus-26-train	MSA	أكلت كثيرا نوعا ما .	ثقلت شوي بالأكل.	يعني كلت كثير .	نوعا ما	يعني
5914	corpus-6-test-corpus-26-train	MSA	هل يمكن أن أتحدث إلى السيدة براون ؟	ممكن أحكي مع الآنسة براون؟	ممكن أحكي مع الآنسة براون؟	سيدة	آنسة	أتحدث	أحكي
5916	corpus-6-test-corpus-26-train	MSA	هذا البيت يبدو مريحا للمعيشة فيه , أليس كذلك ؟	هاد البيت مبين كتير مريح العيش فيه، مش هيك؟	هاد البيت مبين كثير مريح العيشة فيه، مش هيك؟	معيشة	عيشة
5934	corpus-6-test-corpus-26-dev	MSA	أريد أن أحجز على شركة نورث وست إيرلينز على الرحلة رقم صفر ثمانية ستة في الخامس .	بدي احجز على شركة نورث وست إيرلينز على الرحلة رقم صفر ثمانية ستة في الخامس.	بدي احجز على شركة نورث وست إيرلينز على الرحلة رقم صفر ثمانية ستة بخمسة الشهر.	خامس	خمسة
5940	corpus-6-test-corpus-26-train	MSA	محفظتي , جواز السفر ومتعلقات شخصية أخرى .	محفظتي، جواز السفر وثبوتات شخصية ثانية.	محفظتي، جواز السفر وشغلات شخصية ثانية.	متعلقات	شغلات
5956	corpus-6-test-corpus-26-train	MSA	متى تغلقون ؟	متى بتسكرو؟	متى بتسكرو؟	تغلقون	بتسكروا
5974	corpus-6-test-corpus-26-test	MSA	انتظر دقيقة . ربما أكون قد تركته في غرفة الاستراحة .	استنى دقيقة. ممكن أكون تركته بغرفة الاستراحة.	استنى دقيقة. ممكن أكون تركته بغرفة الاستراحة.	انتظر	استنى	ربما	ممكن
5987	corpus-6-test-corpus-26-train	MSA	هذا بالضبط ما كنت سأقوله .	هاد بالزبط اللي كنت بدي أحكيه.	هاظ بالزبط اللي كنت بدي أحكيه.	بالضبط	بالزبط
5988	corpus-6-test-corpus-26-train	MSA	نعم , أعتقد ذلك .	اه، بتوقع هيك.	اه، بتوقع هيك.	نعم	اه	أاعتقد	بتوقع
5997	corpus-6-test-corpus-26-train	MSA	منزلك كبير . كم عدد الغرف ؟	بيتك كبير. قديش عدد الغرف؟	بيتك كبير. قديش عدد الغرف؟	منزلك	بيتك
6006	corpus-6-test-corpus-26-train	MSA	استمتعنا بالعشاء .	استمتعنا بالعشا.	كيفنا عالعشا.	استمتعنا	كيفنا
6024	corpus-6-test-corpus-26-test	MSA	أفهم ، لكن لا أستطيع أن أقولها .	فاهم، بس مش قادر أحكيه.	فاهم، بس بقدر أقولها.	أفهم	فاهم	لكن	بس
6047	corpus-6-test-corpus-26-train	MSA	أوو ، نعم ، من فضلك . أنا أتمنى أن لا يصابوا بدوار البحر .	ممم، اه، لو سمحت. أنا بس بتمنى ما يصيبهم دوار البحر.	ممم، اه، لو سمحت. أنا بس بتمنى ما يصيبهم دوار البحر.	يصابوا	يصيبهم
6056	corpus-6-test-corpus-26-test	MSA	إلى طوكيو ، من فضلك .	على طوكيو، لو سمحت.	على طوكيو، لو سمحت.	إلى	على
6073	corpus-6-test-corpus-26-train	MSA	ما هو موعد وصولنا المقدر ؟	متى متوقع نوصل؟	شو هو قت وصولنا المتوقع؟	مقدر	متوقع
6086	corpus-6-test-corpus-26-train	MSA	سأغادر باكراً غداً ، لذلك أود أن أدفع الآن .	بدي اطلع بكرا الصبح، عشان هيك حابب أدفع هسا.	بدي اطلع بكرا الصبح، عشان هيك حاب أدفع هسا.	لذلك	عشان
6100	corpus-6-test-corpus-26-test	MSA	نبيذ غير حلو ، من فضلك .	نبيذ غير حلو، لو سمحت.	واين بدون سكر، لو سمحت.	غير حلو	بدون سكر
6109	corpus-6-test-corpus-26-test	MSA	مقعد ممنوع به التدخين ، من فضلك .	مقعد عند غير المدخنين، لو سمحت.	مقعد ممنوع التدخين فيه ، لو سمحت.
6156	corpus-6-test-corpus-26-train	MSA	هو مشغول الآن .	هو مشغول هسا.	هو مشغول هسا.	الآن	هسا
6167	corpus-6-test-corpus-26-train	MSA	هل الأجانب يمكنهم الحصول على الكتب في المكتبة ؟	ممكن الأجانب يستخدموا الكتب بهاي المكتبة؟	بقدروا الأجانب يستخدموا الكتب بالمكتبة؟	يمكنهم	بقدروا
6179	corpus-6-test-corpus-26-train	MSA	هل من الممكن أن أمكث في غرفتي حتى الثانية مساءً ؟	ممكن اضل بغرفتي للساعة ثنتين المسا؟	ممكن أظل بغرفتي للساعة ثنتين المسا؟	أمكث	أظل
6190	corpus-6-test-corpus-26-train	MSA	ها-ها . صباح الخير حان دورك . إنه على ما يرام .	هه-هه. صباح الخير صار دورك. هو كويس.	هههه. صباح الخير صار دورك. هو كويس.	حان	صار	على ما يرام	كويس
6193	corpus-6-test-corpus-26-train	MSA	أود بعضاً من فيلم رقم ايه إس ايه لهذه الكاميرا ، من فضلك .	بدي فيلم رقم ايه إس ايه لهاي الكاميرا، لو سمحت.	بدي فيلم رقم ايه إس ايه لهاي الكميرا، لو سمحت.	كاميرا	كميرا
6205	corpus-6-test-corpus-26-train	MSA	أين رسومات مونيت ؟	وين لوحات مونيت؟	وين رسمات مونيت؟	رسومات	رسمات
6214	corpus-6-test-corpus-26-train	MSA	البيتزا لذيذة . من صنعها ؟	هاي البيتزا زاكية. مين عملها؟	هاي البيتزا زاكية. مين عملها؟	صنعها	عملها	لذيذ	زاكية
6221	corpus-6-test-corpus-26-train	MSA	ما هو طعم هذا الطبق ؟	شوطعم هاد الأكل؟	شوطعم هاذ الأكل؟	أكل	طبق
6227	corpus-6-test-corpus-26-train	MSA	هم أيضاً غاليين .	هدول كمان غاليين.	هذول كمان غاليين.	هم	هذول	أيضاً	كمان
6228	corpus-6-test-corpus-26-train	MSA	متى يغادر القطار التالي إلى بوسطن ؟	متى راح يتحرك القطار الجاي على بوسطن؟	متى راح يتحرك القطار الجاي على بوسطن؟	التالي	الجاي	يغادر	يتحرك
6232	corpus-6-test-corpus-26-dev	MSA	أخطط لتعلم الجولف .	أنا بخطط أتعلم جولف.	بفكر أتعلم جولف.	بخطط	بفكر
6247	corpus-6-test-corpus-26-dev	MSA	من فضلك أعطني مشروباً أخر .	لو سمحت أعطيني أشرب مرة ثانية.	لو سمحت أعطيني عصير ثاني.	آخر	ثاني
6253	corpus-6-test-corpus-26-train	MSA	يا له من راكب ماهر للأمواج .	راكب أمواج شاطر.	راكب أمواج شاطر.	ماهر	شاطر
6272	corpus-6-test-corpus-26-train	MSA	أخشى أن تكون الأكمام قصيرة جدا .	آسف الكمام كثير قصيرة.	خايف تكون الكمام كثير قصيرة.	جدا	كثير
6283	corpus-6-test-corpus-26-train	MSA	هل يمكنك أن تريني كيف أضع الغاز ؟	ممكن تورجيني كيف أحط الغاز؟	ممكن توريني كيف أحط الغاز؟	ترني	توريني	أضع	أحط
6285	corpus-6-test-corpus-26-train	MSA	هل أجرة الفندق تضم الإفطار ؟	دخولية الفندق شاملة الفطور؟	أجار الفندق شاملة الفطور؟	تضم	شاملة	أجرة	أجار
6287	corpus-6-test-corpus-26-train	MSA	هل هذا كل شيء ؟	هاد كل اشي؟	هاظ كل اشي؟	هذا	هاظ
6291	corpus-6-test-corpus-26-train	MSA	إنه في نهاية هذا الطريق .	هو في أخر هاد الطريق.	هو بنهاية هاظا الطريق.	هذا	هاظا
6339	corpus-6-test-corpus-26-train	MSA	من فضلك ابدأ العداد .	لو سمحت شغل العداد.	لو سمحت شغل العداد.	ابدأ	شغل
6363	corpus-6-test-corpus-26-train	MSA	غرفتي أبرد من اللازم .	غرفتي كثير باردة.	غرفتي أبرد من اللازم.
6411	corpus-6-test-corpus-26-train	MSA	سأعود إليك عندما تكون أقل انشغالاً .	راح أرجع عندك بس تكون مش مشغول كثير.	راح أرجعلك بس تكون مش مشغول كثير.	أعود	أرجع
6413	corpus-6-test-corpus-26-dev	MSA	هل لديك واحد أكبر ؟	عندك واحد أكبر؟	عندك واحد أكبر؟
6418	corpus-6-test-corpus-26-train	MSA	أشعر بتحسن .	أنا حاسس حالي أحسن.	حاس بتحسن.	أشعر	حاس
6430	corpus-6-test-corpus-26-dev	MSA	هل أنت ملم بجغرافيا اليابان ؟	انت بتعرف عن جغرافية اليابان؟	إنت ملم بتظاريس اليابان؟	جغرافيا	تظاريس
6436	corpus-6-test-corpus-26-train	MSA	من فضلك أرني أين أنا على هذه الخريطة .	لو سمحت ورجيني وين أنا موجود على هاي الخريطة.	لو سمحت ورجيني وين أنا موجود على هاي الخريطة.
6437	corpus-6-test-corpus-26-train	MSA	مائة بالمائة قطن .	مية بالمية قطن .	مية بالمية قطن .	بالمائة	بالمية
6466	corpus-6-test-corpus-26-train	MSA	أود أن أغير لغرفة تطل على المحيط . هل توجد أي رسوم إضافية ؟	بدي أبدل لغرفة مطلة على البحر. في أي دفع اضافي؟	بدي أبدل لغرفة مطلة على البحر. في أي رسوم ثانية؟	إضافية	ثانية	أغير	أبدل
6472	corpus-6-test-corpus-26-train	MSA	كم ثمن إيجار نصف يوم للوحة ؟	قديش بكلف استأجار سفينة لمدة نص يوم؟	قديش بكلف استئجار سفينة لمدة نص يوم؟	إيجار	اسئجار
6481	corpus-6-test-corpus-26-train	MSA	العاشر من نوفمبر .	عشرة نوفمبر.	عشرة احدعش.	احدعش	نوفمبر
6484	corpus-6-test-corpus-26-dev	MSA	أود شريطاً للآلة الكاتبة .	بدي شريط آلة كاتبة.	بدي شريط للآلة كاتبة.
6492	corpus-6-test-corpus-26-train	MSA	إنها لذيذة جداً .	كثير زاكي.	كثير طيبة.	لذيذة	طيبة
6497	corpus-6-test-corpus-26-train	MSA	متى سنقلع ؟	متى راح نقلع؟	أميت راح نقلع؟
6498	corpus-6-test-corpus-26-train	MSA	كيف عرفت السائق متى تريد أن تنزل ؟	كيف بتخلي السواق يعرف لما بدك تنزل؟	كيف بتخلي السايق يعرف إنك بدك تنزل؟	سائق	سايق
6513	corpus-6-test-corpus-26-train	MSA	أربعة وعشرين دولاراً . هل تريد المزيد ؟	أربعة وعشرين دولار. بدك كمان؟	أربعة وعشرين دولار. بدك كمان؟	المزيد	كمان
6515	corpus-6-test-corpus-26-train	MSA	عملت الحجز في طوكيو منذ شهر .	عملت الحجز في طوكيو قبل شهر.	عملت الحجز بطوكيو من شهر.	منذ	من
6517	corpus-6-test-corpus-26-train	MSA	أشكرك من أعماق قلبي .	بشكرك من كل قلبي.	بشكرك من كل قلبي.					من أعماق قلبي : من كل قلبي
6525	corpus-6-test-corpus-26-train	MSA	هل أنزل هنا لمركز روكفيلر ؟	راح أنزل من هون على مركز روكفيلر؟	أنزل من هون عمركز روكفيلر؟
6539	corpus-6-test-corpus-26-train	MSA	من فضلك قس حجم حذائي .	لو سمحت قيس حجم كندرتي.	لو سمحت قيس حجم كندرتي.	قس	قيس	حذاء	كندرة
6547	corpus-6-test-corpus-26-train	MSA	إنها رائعة .	هاد روعة.	هاي روعة.	رائعة	روعة
6550	corpus-6-test-corpus-26-train	MSA	هل ستحدد موعداً للخروج معي ؟	بدك تحدد موعد لتطلع معي؟	بدك تحدد موعد لتطلع معي؟	تخرج	تطلع
6552	corpus-6-test-corpus-26-train	MSA	من فضلك نظف هذا المعطف .	لو سمحت نظف هاد الكبوت.	لو سمحت نظف هاظا الكبوت.	المعطف	الكبوت
6553	corpus-6-test-corpus-26-train	MSA	أود أن أؤجر قارب بمحرك .	بدي استأجر قارب سريع.	بدي استأجر قارب سريع.	أؤجر	استأجر
6574	corpus-6-test-corpus-26-train	MSA	أين قسم السيدات ؟	وين قسم البنات؟	وين قسم النسوان؟	سيدات	نسوان
6581	corpus-6-test-corpus-26-train	MSA	القهوة غير محسوبة .	القهوة مش مشمولة؟	القهوة مش محسوبة؟	غير	مش
6593	corpus-6-test-corpus-26-train	MSA	في أي مجال كان من قبل ؟	بأي مجال هو كان قبل؟	بأي مجال هو كان قبل؟
6602	corpus-6-test-corpus-26-train	MSA	اللعنة . اللعنة . اللعنة . اللعنة . لقد كبرت معتاداً على وجهها .	يلعن. يلعن. يلعن. يلعن. أنا تعودت كثيرعلى وجهها.	يلعن. يلعن. يلعن. يلعن. أنا تعودت كثيرعلى وجهها.	اللعنة	يلعن
6609	corpus-6-test-corpus-26-train	MSA	هل يجب أن أدفع الرسم الإضافي عندما أدخل مبنى ؟	لازم أدفع رسوم اضافية بس أدخل على مبنى؟	لازم أدفع رسوم ثانية بس أفوت عأي مبنى؟
6613	corpus-6-test-corpus-26-test	MSA	أهلاً ، شريكك على الخط . هيا ، من فضلك .	مرحبا، الطرف الثاني على الخط. تفضل، لو سمحت.	اهلين ، اللي طلبته على الخط. يلا، لو سمحت.	هيا	يلا	اهلاً	أهلين
6625	corpus-6-test-corpus-26-train	MSA	جرحي يؤلمني .	جرحي بنزف.	جرحي بوجعني.	يؤلمني	بوجعني
6635	corpus-6-test-corpus-26-train	MSA	أين المحطة ؟	وين المحطة؟	وين المحطة؟
6657	corpus-6-test-corpus-26-train	MSA	عندي قشعريرة .	عندي قشعريرة.	عندي قشعيرية.	قشعريرة	قشعيرية
6659	corpus-6-test-corpus-26-train	MSA	ثلاثة أيام .	ثلاثة أيام.	ثلاث أيام.
6660	corpus-6-test-corpus-26-dev	MSA	أعبر الجسر من هناك ، وستجد المكتبة على يدك اليسرى .	اقطع الجسر لهناك، وراح تلاقي المكتبة على ايدك الشمال.	اقطع الجسر لهناك، وراح تلاقي المكتبة على ايدك الشمال.	أعبر	اقطع	يسرى	شمال
6692	corpus-6-test-corpus-26-dev	MSA	من فضلك ساعدني أعثر على مرشد يتحدث اليابانية .	لو سمحت ساعدني ألاقي دليل سياحي بحكي ياباني.	لو سمحت ساعدني ألاقي دليل سياحي بحكي ياباني.	أعثر	ألاقي	مرشد	دليل
6699	corpus-6-test-corpus-26-train	MSA	لا أريد واحدة ضخمة .	ما بدي واحدة ضخمة.	ما بدي وحدة دفشة.	ضخم	دفش
6700	corpus-6-test-corpus-26-train	MSA	سيكون هناك تأخير بسيط .	راح يكون في تأخير بسيط.	راح يكون في تأخير بسيط.	هناك	في
6715	corpus-6-test-corpus-26-train	MSA	ما هي الفوارق بين هذه الفنادق ؟	شو الفرق بين هدول الفنادق؟	شو الفرق بين هاي الفنادق؟	فوارق	فرق
6724	corpus-6-test-corpus-26-test	MSA	فاتتني محطتي .	راح على الموقف.	راح علي الموقف.	فاتني	راح علي
6736	corpus-6-test-corpus-26-train	MSA	كان عظيماً . شكراً .	كان روعة. شكراً الك.	كان مرتب . شكراً الك.	عظيم	مرتب
6740	corpus-6-test-corpus-26-dev	MSA	سأكون هناك حوالي السادسة مساءً .	راح أكون هناك حوالي الساعة ستة المسا.	راح أكون هناك حوالي الساعة ستة المسا.	سادسة	ستة
6746	corpus-6-test-corpus-26-train	MSA	هل لديك أي شيء لفترة أطول قليلاً ؟	عندك أي اشي لفترة أطول شوي؟	عندك أي اشي لوقت أطول شوي؟
6766	corpus-6-test-corpus-26-train	MSA	تاريخ الانتهاء تسعة عشر من مارس تسعة وتسعين .	تاريخ انتهاء الصلاحية تسعطعش مارس تسعة وتسعين.	تاريخ انتهاء الصلاحية تسعطعش من شهر ثلاث التسعة وتسعين.	تسعة عشر	تسعطعش
6780	corpus-6-test-corpus-26-test	MSA	كيف كانت ؟	كيف كانت؟	كيف كانت؟
6800	corpus-6-test-corpus-26-train	MSA	هل توجد أية كازينوهات جيدة ؟	في أي كازينوهات حلوة؟	في أي كازينوهات حلوة؟	جيدة	حلوة
6810	corpus-6-test-corpus-26-train	MSA	هذه هي فلوس أقلام الحبر . فاتورة بمائة دولار .	هاي المصاري لأقلام الحبر. فاتورة بمية دولار.	هايذ حق قلام الحبر. فاتورة بمية دولار.	اقلام	قلام
6812	corpus-6-test-corpus-26-train	MSA	أين قسم السيدات ؟	وين قسم البنات؟	وين قسم النسوان؟	نساء	نسوان
6825	corpus-6-test-corpus-26-train	MSA	أين يمكن أن أركب القارب ؟	وين بقدر اركب القارب؟	من وين بقدر اطلع بالقارب؟
6832	corpus-6-test-corpus-26-train	MSA	صديقي مصاب .	صاحبي مصاب.	صاحبي انصاب.	صديفي	صاحبي	مصاب	انصاب
6835	corpus-6-test-corpus-26-train	MSA	تبدو بصحة جيدة .	شكلك منيح.	شكلك منيح.	تبدو	شكلك
6836	corpus-6-test-corpus-26-dev	MSA	هل سيكون هذا المتجر مفتوحاً غداً ؟	راح يكون هاد المحل فاتح بكرا؟	راح يكون هاظ المحل فاتح بكرا؟	مفتوح	فاتح	متجر	محل
6862	corpus-6-test-corpus-26-test	MSA	إنه طول الطريق لنهاية البهو .	على طول في اخر القاعة.	على طول الطرق لآخر اللوبي.	نهاية	آخر			البهو: اللوبي
6864	corpus-6-test-corpus-26-train	MSA	هل يمكنك أن تشذب شاربي ؟	ممكن لو سمحت ترتبلي شواربي؟	ممكن لو سمحت ترتبلي شواربي؟	تشذب	ترتب	شاربي	شواربي
6866	corpus-6-test-corpus-26-dev	MSA	هذا يأتي مع طبق السلطة واختيار بين البطاطس المشوية أو المحمرة .	هاد بيجي معه سلطة واختيار من البطاطا المهروسة أو البطاطا مقلية.	هاذ بيجي معه صحن سلطة ويا بطاطا مشوية يا محمرة.	طبق	صحن	بطاطس	بطاطا
6875	corpus-6-test-corpus-26-dev	MSA	أين يمكنني أن أشتري إبريقاً ؟	من وين بقدر اشتري ابريق؟	من وين بقدر اشتري بريق؟	إبريق	بريق
6914	corpus-6-test-corpus-26-train	MSA	لا يمكن أن أبيع هذه دون روشتة .	ما بقدر أبيع هاد من دون وصفة طبية.	ما بقدر أبيع هاي بدون وصفة طبية.	روشتة	وصفة
6917	corpus-6-test-corpus-26-train	MSA	هل يمكن أن أحجز خمسة مقاعد في الصف نفسه .	ممكن أحجز خمس مقاعد بنفس الصف؟	ممكن أحجز خمس مقاعد بنفس الصف؟
6923	corpus-6-test-corpus-26-test	MSA	هل يمكنك أن تقرضني حبل القطر ، من فضلك ؟	ممكن تعيرني حبل القطر، لو سمحت؟	ممكن تعيرني حبل القطار، لو سمحت؟	تقرضني	تعيرني
6944	corpus-6-test-corpus-26-train	MSA	أي سيارة ذات أداء أفضل ؟	أي سيارة ادائها احسن؟	أي سيارة سواقتها احسن؟	افضل	أحسن
6960	corpus-6-test-corpus-26-train	MSA	لن تأخذ خصماً مهما حاولت .	ما راح تاخد خصم قد ما حاولت .	ما رح توخد خصم قد ما حاولت .	مهما	قد ما
6966	corpus-6-test-corpus-26-train	MSA	هلا فتحت هذه الحقيبة ، من فضلك ؟ ماذا يوجد هنا .	بتقدر تفتح هاي الشنطة، لو سمحت؟ شو لقيت فيها هون؟	بتقدر تفتح هاي الشنطة، لو سمحت؟ شو لقيت فيها هون؟	هلا	بتقدر
6970	corpus-6-test-corpus-26-train	MSA	أريد أن أعمل مكالمة مسافة طويلة إلى فندق هيلتون في بوسطن .	أنا بدي أتصل مكالمة طويلة نوعاً ما على فتدق هيلتون في بوسطن.	بدي أحكي تلفون لمسافة طويلة لعند فندق هيلتون في بوسطن.
6984	corpus-6-test-corpus-26-test	MSA	هل السيدات يقبلن هذا ؟	البنات بتقبلوا هاد؟	الستات بقبلن بهاذ؟	السيدات	الستات
6991	corpus-6-test-corpus-26-train	MSA	كن حذراً ، السقف منخفض .	دير بالك، السقف واطي.	انتبه ، السقف واطي.	كن حذراً	انتبه	منخفض	واطي
6999	corpus-6-test-corpus-26-train	MSA	لا أستطيع رؤية الشاشة جيداً من هنا ، هل يمكنني تبديل المقاعد لبعض الوقت ؟	أنا مش قادر أشوف الشاشة كثير منيح من هون. ممكن أغير مكاني شوي؟	أنا مش قادر أشوف الشاشة مليح من هون. ممكن نبدل المقاعد شوي؟	أستطيع	بقدر
7030	corpus-6-test-corpus-26-train	MSA	لقد قمت بزيارة البحيرات الكبرى لأول مرة .	هاي أول مرة بزور البحيرات الكبرى.	هاي أول مرة بزور البحيرات الكبرى.
7048	corpus-6-test-corpus-26-train	MSA	ثمة شئ خطأ في آلة التهوية هذه .	في اشي معطل بآلة البيع هاي.	في اشي غلط بالمروحة هاذ.	ثمة	في	آلة تهوية	مروحة
7057	corpus-6-test-corpus-26-train	MSA	أحتاج إلى طيب .	بدي دكتور.	بدي دكتور.	طبيب	دكتور	أحتاج	بدي
7070	corpus-6-test-corpus-26-train	MSA	كم المدة التي قضتها هي حتى الآن في المملكة المتحدة ؟	كم عاشت بالمملكة المتحدة؟	قديش المدة اللي عاشتها بإنجلترا؟	قضتها	عاشتها			إتجلترا :المملكة المتحدة
7081	corpus-6-test-corpus-26-train	MSA	من المرجح أن محبا للإبداع الفني مثلك سيستمتع اللوحات الزيتية غير التقليدية وعروض الموسيقى بالشوارع .	كونك من محب للابداع الفني راح تستمتع باللوحات الزيتية والموسيقى المعروضة بالشوارع.	متوقع من محب للابداع الفني مثلك راح ينبسط باللوحات الزيتية والموسيقى وعروض الموسيقى بالشوارع.	مرجح	متوقع	يستمتع	ينبسط
7098	corpus-6-test-corpus-26-train	MSA	كم الوقت ؟	قديش الساعة؟	قديش الساعة؟	كم	قديش
7099	corpus-6-test-corpus-26-dev	MSA	سآخذ هوت دوج وكولا .	راح آخد سندويشة هوت دوغ و ببسي.	رح آخذ سندويشة هوت دوغ وكولا.	سوف	رح
7104	corpus-6-test-corpus-26-dev	MSA	هذا هو مسئول الربط الخارجي .	هاد هو موظف المكالمات الخارجي.	هاظ هو مسؤول الربط الخارجي.
7123	corpus-6-test-corpus-26-train	MSA	يمكنك رؤية مبنى ابيض اللون ، أليس كذلك ؟ إنه أمام ذلك المبنى .	بتقدرتشوف عمارة بيضا، صح؟ هو مقابل هاي العمارة.	بتقدر تشوف عمارة بيضا، صح؟ هو قبال هاي العمارة.	أمام	قبال	بيضاء	بيضا
7130	corpus-6-test-corpus-26-test	MSA	منذ متى ؟	من متى؟	من متى؟
7137	corpus-6-test-corpus-26-test	MSA	ليس لدى أي شئ لكي أعلنه .	ما عندي أي اشي عشان أعلنه.	ما عندي أي اشي عشان أعلنه.	لكي	عشان	ليس	ما
7198	corpus-6-test-corpus-26-dev	MSA	ماذا ؟ هل عليك دفع ضرائب عندما يكون لديك أكثر من ثلاثة زجاجات كحول ؟	شو؟ لازم تدفع ضريبة بس يكون عندك أكثر من ثلاثة قناني كحول؟	شو؟ عليك ضرايب بس يكون عندك أكثر من ثلاث قناني كحول؟	زجاجات	قناني	ضرائب	ضرايب
7206	corpus-6-test-corpus-26-dev	MSA	صديقي مريض جداً . هل تستطيع أن تطلب دكتور ، من فضلك ؟	صاحبي كثير مريض. ممكن تتصل بالدكتور، لو سمحت؟	صاحبي كثير مريض. ممكن تطلب الدكتور، لو سمحت؟	صديقي	صاحبي
7227	corpus-6-test-corpus-26-test	MSA	لا أعرف كثيراً عن النبيذ ؟ ماذا يناسب هذا الطبق ؟	أنا ما بعرف كثير بالخمر. شو بنفع مع هاد الأكل؟	أنا ما بعرف كثير بالواين. شو بنفع مع هاذ الأكل؟	طبق	أكل	يناسب	بنفع
7233	corpus-6-test-corpus-26-dev	MSA	هل تستطيع أن تتصل بي في الصباح الباكر ، من فضلك ؟	ممكن تتصل في الصبح بكير، لو سمحت؟	بتقدر تتصل في الصبح بكير، لو سمحت؟	بي	فيّ
7248	corpus-6-test-corpus-26-dev	MSA	هناك محطة غاز بعد مربعين سكنيين من هنا .	في محطة غازعلى بعد شارعين من هون.	في محطة غاز على بعد حارتين من هون.	مربع سكني	حارة
7253	corpus-6-test-corpus-26-train	MSA	اليابانيون لا يأخذون إجازات طويلة .	الناس اليبانيين ما بياخدو عطل طويلة.	اليبانيين ما بيوخذو عطل طويلة.	إجازات	عطل	يأخذون	بوخذوا
7264	corpus-6-test-corpus-26-train	MSA	اشعر كأن هناك تحديق في . هل من النادر رؤية شخص ياباني ؟	حاسس حالي عم بسرح فيه. لهاي الدرجة قليل تشوف واحد ياباني؟	حاسك بتسرح فيه. لهاي الدرجة قليل تشوف واحد ياباني؟	أحدق	بسرح
7269	corpus-6-test-corpus-26-test	MSA	بالطبع لا . لماذا تقول إذا ؟	طبعاً لأ. ليش بتحكي لعاد؟	طبعاً لأ. ليش بتحكي لعاد؟	بالطبع	طبعاً	لماذا	ليش
7270	corpus-6-test-corpus-26-train	MSA	أي طريق يؤدي إلى مكتب البريد المركزي ؟	اي طريق بودي لمكتب البريد المركزي؟	اي طريق بودي لمكتب البريد المركزي؟	يؤدي	بودي
7274	corpus-6-test-corpus-26-train	MSA	أين محطة أتوبيس جرايهاوند في هذه البلدة ؟	وين محطة الباص السلوقي في هاي المدينة؟	وين مجمع باصات جرايهاوند بهاي المدينة؟	بلدة	مدينة	محطة	مجمع
7281	corpus-6-test-corpus-26-train	MSA	أليست المطاعم اليابانية في كيوتو غالية ، بالرغم من ذلك ؟	صح المطاعم اليابانية في كيوتو غالية؟	مش المطاعم اليابانية في كيوتو غالية؟	أليست	مش
7289	corpus-6-test-corpus-26-train	MSA	اعتقد أن هذا عالي قليلا بالنسبة لي .	بتوقع أنه شوي عالي بالنسبة الي.	بتوقع أنه شوي عالي بالنسبة الي.	قليلا	شوي
7291	corpus-6-test-corpus-26-test	MSA	لدينا غرفة مزدوجة بحمام بخمسة و ثمانين دولار .	عنا غرفة مزوج مع حمام بخمسة وتمنين دولار.	عنا غرفة مزوجة مع حمام بخمسة وثمنين دولار.	مزدوجة	مزوجة
7305	corpus-6-test-corpus-26-train	MSA	أريد سعر الكتاب .	بدي سعر الكتاب.	بدي سعر الكتاب.	أريد	بدي
7314	corpus-6-test-corpus-26-test	MSA	الجو ابرد من المعتاد هذا العام ، لكنه ليس باردا بما يكفى لتساقط الثلج .	الجو ابرد هاي السة عن كل مره, بس مش باردة لدرجة اتلج.	الجو أبرد من المعتاد هاي السنة ، بس مش باردة كفاية لحتى تثلج.	عام	سنة	بما يكفي	كفاية
7321	corpus-6-test-corpus-26-train	MSA	أين يمكنني شراء تذكرة للمترو ؟	من وين بقدر أشتري بطاقة قطار؟	من وين بقدر أشتري تذكرة للمترو؟
7335	corpus-6-test-corpus-26-train	MSA	سآخذ مقاعد درجة رجال أعمال ، أليس كذلك ؟	راح آخد مقعد رجال الأعمال، صح؟	راح آخد مقاعد درجة رجال الأعمال، صح؟	أليس كذلك	صح
7343	corpus-6-test-corpus-26-train	MSA	كم أجرة التاكسي من هذا الفندق إلى المحطة ؟	كم اجار التكسي من الفندق للمحطة؟	كم اجار التكسي من الفندق للمجمع؟	اجرة	أجار
7349	corpus-6-test-corpus-26-train	MSA	هل لي بهذه وهذه ، من فضلك ؟	ممكن آخد هاد وهاد، لو سمحت؟	ممكن آخذ هاي وهاي ، إذا تكرمت؟
7381	corpus-6-test-corpus-26-train	MSA	يقولون أن اليابان دولة غنية جداً .	بحكوا أنه اليابان بلد غني.	بقولوا أنه اليابان بلد غني.	يقولون	بقولوا
7386	corpus-6-test-corpus-26-train	MSA	هل هناك أي غرف خالية في عربة النوم ؟	ضل في أي غرف مجانية بعربايات النوم؟	ظل في أي غرف فاظية بعرباية النوم؟	خالية	فاظية
7391	corpus-6-test-corpus-26-dev	MSA	هل تستطيع خفضها حتى عشرين دولار ، من فضلك ؟	بتقدر تنولها حتى عشرين دولار، لو سمحت؟	بتقدر تنزلها لعشرين دولار، لو سمحت؟	خفضها	تنزلها
7395	corpus-6-test-corpus-26-train	MSA	هذه هديه لصديق .	هاي هدية لصاحبي.	هاي هدية لرفيقي.	صديق	رفيق
7412	corpus-6-test-corpus-26-train	MSA	الثلج يجعل الطريق زلق .	التلج بخلي الطريق يزحلق.	التلج بخلي الطريق يزحلق.	زلق	يزحلق	يجعل	بخلي
7414	corpus-6-test-corpus-26-train	MSA	لا أستطيع أن أجد كاميرتي .	مش ملاقي الكاميرا تبعتي.	ما قدرت الاقي الكميرا تبعتي.	أستطيع	قدرت	أجد	ألاقي
7416	corpus-6-test-corpus-26-test	MSA	سأعد سندوتشين من لحم فخذ الخنزير .	بدي اعمل سندويشتين من لحم الخنزير.	بدي اعمل سندويشتين من لحمة فخدة الخنزير.	فخذ	فخدة	أعد	أعمل
7438	corpus-6-test-corpus-26-train	MSA	هل لديك أي شئ لإعلانه ؟	عندك أي اشي عشان تعلن عنه؟	عندك أي اشي عشان تعلنله؟	أعلن	بعلن
7439	corpus-6-test-corpus-26-train	MSA	هل رأيت معطف أزرق ؟ وضعته على هذا الكرسي .	شفت كبوت أزرق؟ حطيته على هاد الكرسي.	شفت كبوت ازرق؟ حطيته على هاد الكرسي.	وضعت	حطيت	أزرق	إزرق
7470	corpus-6-test-corpus-26-test	MSA	هناك محل لبيع الزهور في الطريق .	في محل ورد بس تقطع الشارع.	في محل ورد بالطريق .
7478	corpus-6-test-corpus-26-train	MSA	أنا من طوكيو .	أنا من طوكيو.	أني من طوكيو.	أنا	أني
7479	corpus-6-test-corpus-26-train	MSA	أريد بعض الغسول لإزالة كريم ريفلون .	بدي غسول مشان اشيل كريم ريفلون.	بدي غسول مشان اشيل كريم ريفلون.	أزيل	أشيل
7485	corpus-6-test-corpus-26-train	MSA	لدي بعض الملابس للمغسلة .	عندي شوية أغراض للغسيل.	عندي شوية وعية للغسيل.	ملابس	وعية
7507	corpus-6-test-corpus-26-dev	MSA	لقد طلبته منذ وقت طويل .	أنا طلبته من زمان.	طلبته من زمان.	وقت طويل	زمان
7533	corpus-6-test-corpus-26-dev	MSA	من فضلك هل لك أن ترسل بواباً إلى غرفتي في السادسة صباحاً ؟	ممكن لو سمحت تبعتلي حمال على غرفتي الساعة ستة الصبح؟	ممكن لو سمحت تبعتلي شغيل على غرفتي الساعة ستة الصبح؟	بواب	شغيل
7549	corpus-6-test-corpus-26-train	MSA	سآخذ شيكولاتة ساخنة .	بدي آخد هوت شوكليت.	بدي آخذ هوت شوكليت.					شيكولاتة ساخنة : هوت شوكليت
7550	corpus-6-test-corpus-26-train	MSA	نستطيع أن نرتب لتنظيف غرفاتكم .	ممكن نرتب معك عشان انظف غرفك.	ممكن نرتب معك عشان تنظيف غرفكم.
7574	corpus-6-test-corpus-26-train	MSA	خاص من فضلك .	خاص، لو سمحت.	خاص من فظلك.
7583	corpus-6-test-corpus-26-train	MSA	كم تكلفة الذهاب إلى فندق سي ؟	قديش بتكلف الرةحة لفندق سي؟	قديش بتكلف الروحة لفندق سي؟	ذهاب	روحة
7612	corpus-6-test-corpus-26-test	MSA	هل أستطيع الحصول على تذكرة متعددة الاستخدام ؟	ممكن أحجز بطاقة متعددة الاستخدام؟	ممكن أوخذ بطاقة ذكية؟	أحصل	أوخذ
7622	corpus-6-test-corpus-26-train	MSA	أود حجز مائدة لفردين في الساعة السابعة , من فضلك .	بدي أحجز طاولة لشخصين الساعة سبعة، لو سمحت.	بدي أحجز طاولة لشخصين الساعة سبعة، لو سمحت.	فردين	شخصين
7626	corpus-6-test-corpus-26-train	MSA	أريد بعض الكريم الليلي .	بدي كريم ليلي.	بدي كريم ليلي.
7627	corpus-6-test-corpus-26-train	MSA	هل لك أن تغلف هذه كالهدية ؟	ممكن تلفلي هاد هدية؟	ممكن تلفلي هاي كهدية؟	تغلف	تلف
7636	corpus-6-test-corpus-26-train	MSA	إنها الثالثة والربع .	الساعة تلاتة وربع.	الساعة ثلاثة وربع.
7650	corpus-6-test-corpus-26-train	MSA	سأخطط لإرسال فواتير حاجياتي اليومية ، لذا من فضلك أخبرني العنوان و اسم الشخص المسئول من فضلك .	راح أخطط عشان أبعت فواتير حاجاتي اليومية، عشان هيك لو سمحت أعطيني عنوان واسم الشخص المسؤول.	رح أبعث فواتير حاجاتي اليومية، عشان هيك لو سمحت أعطيني عنوان واسم الشخص المسؤول.	حاجيات	حاجات
7656	corpus-6-test-corpus-26-test	MSA	إنه من الصعب لنا أن نتحدث الإنجليزية بطلاقة .	صعب علينا نحكي انجليزي بطلاقة.	صعب علينا نحكي انجليزي بطلاقة.	نتحدث	نحكي
7662	corpus-6-test-corpus-26-train	MSA	هل لديك نفس هذا التصميم بكعب أعلى ؟	عندك متل هدول نفس الموديل بس كعب أعلى؟	عندك نفس هاذ الديزاين بس كعب أعلى؟					تصميم : ديزاين
7663	corpus-6-test-corpus-26-train	MSA	أريد جاكيت لطفل في العاشرة من العمر .	بدي جاكيت لولد عمره عشر سنين.	بدي جاكيت لولد عمره عشر سنين.	طفل	ولد
7671	corpus-6-test-corpus-26-train	MSA	خذني إلى طريق أباي , من فضلك .	خدني على شارع آبي، لو سمحت.	وديني على شارع أباي، لو سمحت.	خذني	وديني
7684	corpus-6-test-corpus-26-dev	MSA	شكراً . مرحباً ، شكراً لانتظارك .	شكراً الك. مرحبا، شكراً لأنك استنيت.	شكراً الك. مرحبا، شكراً لأنك استنيت.	مرحباً	مرحبا
7693	corpus-6-test-corpus-26-train	MSA	أنا متأكد أن لدى حجز .	أنا متأكد أنه الي حجز.	أنا متأكد أنه إلي حجز.	لدي	إلي
7708	corpus-6-test-corpus-26-train	MSA	سأرسلها لك ، لذا من فضلك انتظر هنا .	أنا راح أبعته الك، عشان هيك استنى هون لو سمحت.	راح أبعثها الك، عشان هيك استنى هون لو سمحت.	لذا	عشان	انتظر	استنى
7712	corpus-6-test-corpus-26-dev	MSA	نحن هنا لمدة يوم .	احنا هون ليوم.	إحنا هون لمدة يوم.
7721	corpus-6-test-corpus-26-train	MSA	أشعر بصداع خفيف .	عندي صداع خفيف.	حاس بصداع خفيف.	أشعر	حاس
7736	corpus-6-test-corpus-26-train	MSA	لقد استمتعت بالوجبة كثيراً جداً .	كتير استمتعت بالوجبة.	كثير استمتعت بالوجبة.
7756	corpus-6-test-corpus-26-train	MSA	لا ، من فضلك اجلس وانتظر . سأعود بعد قليل .	لا، لو سمحت اقعد واستنى. راح أرجعلك.	لا، لو سمحت اقعد واستنى. راح أرجعلك بعد شوي.	اجلس	اقعد	قليل	شوي
7761	corpus-6-test-corpus-26-test	MSA	هل لي أن أرى السيارة ؟	ممكن أشوف السيارة؟	ممكن أشوف السيارة؟	هل لي	ممكن
7767	corpus-6-test-corpus-26-train	MSA	هل لك أن ترسم لي خريطة , من فضلك ؟	ممكن ترسملي خريطة، لو سمحت؟	ممكن ترسملي خريطة، لو سمحت؟
7789	corpus-6-test-corpus-26-test	MSA	حسناً ، يا سيدي . من فضلك ابق في غرفتك إلى أن يحضر الطبيب .	طيب، أستاذ. لو سمحت خليك بغرفتك لعند ما يجي الدكتور.	طيب، إستاذ. لو سمحت خليك بغرفتك لعند ما يجي الدكتور.	سيدي	إستاذ	ابق	خليك
7811	corpus-6-test-corpus-26-train	MSA	لقد سرقت في شاطئ وايمانالو . من فضلك تعالى فوراً .	حدا سرقني على شط وايمانالو. لو سمحت تعال بسرعة.	انسرقت على شط وايمانالو. لو سمحت تعال هسا.	فوراً	هسا	تعالى	تعال
7812	corpus-6-test-corpus-26-train	MSA	ماذا عن مائة دولار ؟	شو رأيك بمية دولار؟	شو رأيك بمية دولار؟
7814	corpus-6-test-corpus-26-train	MSA	أريد هذا معبئاً .	بدي هاد مليان.	بدي هاظا مليان.	معبئ	مليان
7831	corpus-6-test-corpus-26-train	MSA	أريد أن أقدم طلباً للحصول على إصدار جديد .	بدي أقدم طلب مشان اخد الاصدار الجديد.	بدي أقدم طلب مشان اخد إصدار جديد.
7834	corpus-6-test-corpus-26-train	MSA	لقد دعمت الحكومة تنمية الصناعات .	الحكومة بتدعم تنمية الصناعات.	الحكومة بتدعم الصناعات.
7838	corpus-6-test-corpus-26-train	MSA	أعتقد أن عمره أكثر من خمسين سنة .	بتوقع عمره اكثر من خمسين سنة.	بتوقع عمره اكثر من خمسين سنة.
7858	corpus-6-test-corpus-26-dev	MSA	ما هو الحد الأدنى للعمر لفعل ذلك ؟	ايش أقل عمر ممكن لعمل هاد؟	إيش أقل عمر مسموح يعمل هيك؟	ما	إيش
7860	corpus-6-test-corpus-26-train	MSA	هل لديك أيّ خرائط بسيطة للمدينة ؟	عندي أي خرائط مبسطة للمدينة؟	عندي أي خرايط بسيطة للمدينة؟	خرائط	خرايط
7867	corpus-6-test-corpus-26-test	MSA	إذا كان بالإمكان ، لم أكن لأخلع السنّة .	اذا ممكن، أنا بفضل ما تخلع السن.	اذا ممكن، أنا بفضل ما تقلع السن.	تخلع	تقلع
7871	corpus-6-test-corpus-26-dev	MSA	إنّ الإحصاء كرة واحدة وضربتين .	الإحصاء عبارة عن طابة وحدة وضربتين.	الإحصاء عبارة عن طابة وحدة وضربتين.	كرة	طابة
7883	corpus-6-test-corpus-26-train	MSA	متى سيصل القطار إلى سان دييجو ، من فضلك ؟	أي ساعة راح يوصل القطار على سان دييجو، لو سمحت؟	أميت رح يوصل القطار على سان دييجو، لو سمحت؟
7913	corpus-6-test-corpus-26-train	MSA	آوه إلقاء نظرة على صندوقك .	واو أنا حابب ألقي نظرة على صندوقك.	واو أنا حاب أشوف صندوقك.
7925	corpus-6-test-corpus-26-train	MSA	أريد بعض الشامبو .	بدي شوية شامبو.	بدي نتفة شامبو.		نتفة
7947	corpus-6-test-corpus-26-train	MSA	أنا أقيم في فندق هيلتون .	أنا قاعد بفندق الهلتون.	أنا قاعد بفندق الهلتون.	أقيم	قاعد
7948	corpus-6-test-corpus-26-train	MSA	أشعر بحالة سيئة وغثيان .	أنا حاسس حالي تعبان ومعصب.	حاس بلعية ووظعي زفت.	غثيان	لعية	سيء	زفت
7957	corpus-6-test-corpus-26-train	MSA	لكنّي لدى موعد لرؤيتها في السّاعة الثّانية .	بس أنا عندي موعد عشان أشوفها الساعة تنتين.	بس أنا عندي موعد عشان أشوفها الساعة ثنتين.
7972	corpus-6-test-corpus-26-train	MSA	هل تذهب هذه السيارة إلى إدنبرة ؟	هاي السيارة رايحة على إيدنبيره؟	هاي السيارة رايحة على إيدنبيره؟	هذه	هاي
7976	corpus-6-test-corpus-26-train	MSA	نعم ، رجاءً املأ هذه الاستمارة .	نعم، لو سمحت عبي هاد النموذج.	نعم، يا ريت تعبي هاي الاستمارة.	رجاءً	يا ريت	املأ	تعبي
7983	corpus-6-test-corpus-26-train	MSA	ما هو مقدار الرسوم للوزن الزائد ؟	قديش الدفع على الوزن الزايد؟	قديش الدفع على الوزن الزايد؟	ما مقدار	قديش	زائد	زايد
7991	corpus-6-test-corpus-26-dev	MSA	اسمي كيمورا . أريد إلغاء حجزي الخاص بيوم الجمعة .	اسمي كيمورا. بدي ألغي حجزي ليوم الجمعة.	اسمي كيمورا. بدي ألغي حجزي تاع يوم الجمعة.	الخاص ب	تاع
7996	corpus-6-test-corpus-26-test	MSA	أوه ، آسف . كانت هناك مشاكل ونحن نقوم بحلها ، هل تتفضل بالانتظار لمدة ثلاثين دقيقة ؟	أووه، أنا آسف. في مشكلة واحنا عم منصلحها. ممكن تستنى حوالي تلاتين دقيقة؟	أووه، أنا آسف. كان في مشاكل منحلها. ممكن تستنى لثلاثين دقيقة؟
8039	corpus-6-test-corpus-26-train	MSA	في أي وقت يمكنني مغادرة الفندق ؟	أي ساعة ممكن أعمل خروج من الفندق؟	بأي ساعة ممكن أعمل خروج من الفندق؟
8050	corpus-6-test-corpus-26-train	MSA	فهمت الأمر .	فهمت عليك.	فهمت الموضوع.	أمر	موضوع
8058	corpus-6-test-corpus-26-train	MSA	سوف أطلب شخصاً ما .	راح أحكي مع حد.	رح أحكي مع حدا.	شخص	حدا
8067	corpus-6-test-corpus-26-test	MSA	هل تريد تسوية الفاتورة الآن ؟	راح تدفع الفاتورة هلأ؟	راح تحاسب عالفاتورة هسا؟
8068	corpus-6-test-corpus-26-train	MSA	السيارة جاءت لي من الجانب عند التقاطع .	السيارة اجتلي من جهة التقاطع.	السيارة اجتلي من جهة التقاطع.	جاءت	اجت
8094	corpus-6-test-corpus-26-train	MSA	إنه صندوق موسيقى .	هاد صندوق موسيقى.	هاذ صندوق موسيقى.	إنه	هاذ
8095	corpus-6-test-corpus-26-train	MSA	أين الضاحية ؟	وين الضاحية؟	وين الضاحية؟
8098	corpus-6-test-corpus-26-train	MSA	هل هناك جولة بالحافلة تجوب المدينة ؟	في باص سياحي بالبلد؟	في دورة بالباص نلف بالبلد؟	جولة	دورة	نجوب	نلف
8108	corpus-6-test-corpus-26-train	MSA	في أي وقت نبدأ ؟	على أي ساعة راح نبلش؟	على أي ساعة راح نبلش؟	نبدأ	نبلش
8114	corpus-6-test-corpus-26-train	MSA	حسنا ، يا سيدي . في الحجم المتوسط نعرض عليك فرو السمور من نوع " ميركوري " ، فهل ذلك يوافقك ؟	تمام، سيدي. بنص الحجم ممكن نوفرلك زئبق أسود. هيك منيح؟	تمام، سيدي. مقاس ميديوم منعطيك فرو السمور من ماركة " ميركوري " . بناسبك؟	يوافقك	بناسبك	حسنا	تمام	حجم متوسط: ميديوم
8116	corpus-6-test-corpus-26-train	MSA	لقد تسببتّ في كَدْمة بالعَضَلة .	عندك كدمة بالعضل.	سوتلك كدمة بالعضل.	تسببت	سوت
8141	corpus-6-test-corpus-26-train	MSA	ولكن عليك أن تعدني بركل الكرة ، وليس أنا . موافق ؟	بس بدي توعدني تضرب الكرة، مش أنا. طيب؟	بس بدي توعدني تشوط الطابة، مش أني. طيب؟	تعدني	توعدني	تركل	تشوط
8143	corpus-6-test-corpus-26-train	MSA	إلى أي مسافة يبعد أكثر ؟	كم كيلو ببعد ؟	كم المسافة اللي ظلت ؟	تبقى	ظل
8149	corpus-6-test-corpus-26-train	MSA	هل لي في استعارة بعض البياضات ؟	ممكن أستعير ملابس كتان؟	ممكن أستعير شرارشف؟	بياضات	شراشف
8156	corpus-6-test-corpus-26-train	MSA	من أي نوع من الجلد الصناعي صُنعت حقيبة السفر هذه ؟	شو نوع الجلد المعمول منه الشنطة؟	شو نوع الجلد الاصطناعي المصنوع منه شنطة السفر هاي؟	حقيبة	شنطة
8161	corpus-6-test-corpus-26-train	MSA	لا أعتقد أن هذه السكينة نظيفة . أيمكنك أن تُحضر لي واحدة أخرى ؟	أنا ما بظن إنه هاي السكينة نظيفة. ممكن تجبلي وحدة تانية؟	أنا ما بظن إنه هاي السكينة نظيفة. بتقدر تجبلي وحدة تانية؟	أيمكنك	بتقدر
8164	corpus-6-test-corpus-26-train	MSA	لقد اشتريت هذه من لحظة ، ولكن هلاً بدلت هذه بتلك ؟	أنا اشتريت هاد من دقيقة، بس ممكن اتبدلي اياها بهاد؟	أنا اشتريت هاي من دقيقة، بس ممكن اتبدلي اياها بهاي؟	تلك	هاي	بدلت	اتبدل
8173	corpus-6-test-corpus-26-train	MSA	بصراحة ، لا أتفق مع ذلك .	بصراحة، أنا مش موافق على هاد.	بصراحة، ما بتفق مع هاظ.	ذلك	هاظ
8177	corpus-6-test-corpus-26-train	MSA	هل هذا هو الطريق الصحيح إلى المحطة المركزية ؟	هاد الطريق الصح للمحطة الرئيسية؟	هاد الطريق الصح للمحطة الرئيسية؟	صحيح	صح	مركزية	رئيسية
8183	corpus-6-test-corpus-26-train	MSA	قارب مع مرشد ، من فضلك .	قارب مع حد يسوقه، لو سمحت.	قارب مع مرشد ، لو سمحت.
8193	corpus-6-test-corpus-26-train	MSA	أود أن أطلب بدلة داكنة من أجلي .	بدي أطلب بدلة لونها غامق إلي.	بدي أطلب بدلة لونها غامق عشاني.	من أجلي	عشاني	داكن	غامق
8194	corpus-6-test-corpus-26-train	MSA	هذه المظلة يمكن استخدامها كعصا للسير .	هاي الشمسية راح تكون بدل العصاي.	هاي الشمسية بقدر استخدمها كعصاية.	عصا	عصاية	مظلة	شمسية
8202	corpus-6-test-corpus-26-test	MSA	هل يجب علىّ أن أترك كل أمتعتي في غرفة ترك المعاطف ؟	لازم أترك كل شنطي بغرفة الامانات؟	لازم أترك كل اغراضي بغرفة الامانات؟	أمتعتي	اغراضي
8210	corpus-6-test-corpus-26-train	MSA	من فضلك أرني جواز سفرك .	لو سمحت ورجيني جواز سفرك.	لو سمحت ورجيني جواز سفرك.	أرني	ورجيني
8227	corpus-6-test-corpus-26-train	MSA	هل يوجد مكان يقبل تنظيف الملابس في أيام الآحاد ؟	في أي مكان بقبل طلبات الغسيل أيام الأحد؟	في أي مكان بقبل طلبات الغسيل كل يوم أحد؟	تنظيف	غسيل
8233	corpus-6-test-corpus-26-train	MSA	سندويتشان برجر بالجبن ، من فضلك .	اتنين برجر بالجبنة، لو سمحت.	اثنين برجر بالجبنة، لو سمحت.	جبن	جبنة
8234	corpus-6-test-corpus-26-train	MSA	أية حافلة تذهب إلى ميامي ؟	أي باص بودي على ميامي؟	أي باص بروح على ميامي؟
8236	corpus-6-test-corpus-26-train	MSA	ولكن لا ضرورة لدفع بقشيش .	بس ما في داعي للبقشيش.	بس ما في داعي للبخشيش.	بقشيش	بخشيش
8248	corpus-6-test-corpus-26-train	MSA	بمقدورك أن ترى واحداً عند " كارينجي هول " .	بامكانك تشوف واحد بقاعة كارنيجي.	بامكانك تشوف واحد بقاعة كارنيجي.	بمقدورك	بإمكانك
8250	corpus-6-test-corpus-26-train	MSA	لستُ معتمداً قانونياً .	أنا مش مؤهل.	أنا مش مؤهل.	معتمد	مؤهل
8271	corpus-6-test-corpus-26-train	MSA	ما هو الصنف المميز للمحل ؟	شو هوالصنف الخاص بالمحل؟	شو هو الصنف المميز بالمحل؟
8280	corpus-6-test-corpus-26-train	MSA	أودّ حجز موعد مع طبيب .	أنا بدي موعد عند دكتور.	أنا بدي موعد عند الدكتور.	طبيب	دكنور
8291	corpus-6-test-corpus-26-dev	MSA	تُرى هل ثمة مائدة متاحة بالقرب من النافذة لسبعة أشخاص الليلة .	أنا بسأل اذا في طاولة ممكن أحجزها قريبة من الشباك لسبعة اشخاص المسا.	يا ترى في طاولة فاضية أحجزها قريبة من الشباك لسبع اشخاص المسا.	تُرى	يا ترى
8295	corpus-6-test-corpus-26-train	MSA	أنت لا تمانع في حضوري إلى منزلك ؟	انت ما عندك مشكلة اني اجي على بيتك؟	إنت ما عندك مشكلة اني آجي على بيتك؟	أحضر	آجي
8305	corpus-6-test-corpus-26-train	MSA	يبدو أن ثمة مجالات للتحسينات .	شكله محتاج تحسين.	شكله في مجال للتحسين.	ثمة	في
8316	corpus-6-test-corpus-26-train	MSA	أين مترو الأنفاق ؟	وين البنية التحتية؟	وين المترو؟
8334	corpus-6-test-corpus-26-train	MSA	هل عندكم منه بحجم أصغر ؟	عندك متله بس مقاس أصغر؟	عندكو منه سايز أصغر؟	عندكم	عندكو			حجم : سايز
8338	corpus-6-test-corpus-26-train	MSA	أين يمكنني الحصول على أسبرين ؟	من وين بقدر أجيب أسبيرين؟	من وين بقدر أجيب أسبيرين؟	أحصل	أجيب
8342	corpus-6-test-corpus-26-train	MSA	ذلك الحد الأدنى للسعر .	هيك أقل إشي.	هيك أقل سعر.	أدنى	أقل
8349	corpus-6-test-corpus-26-train	MSA	من فضلك اعطني تصريحاً سارياً لمدة أسبوع .	لو سمحت أعطيني اذن لمدة أسبوع.	لو سمحت أعطيني اذن لمدة أسبوع.	تصريح	إذن
8355	corpus-6-test-corpus-26-train	MSA	هذا زميلي .	هاد زميلي.	هاذ زميلي.
8358	corpus-6-test-corpus-26-train	MSA	أي نوع من البنزين هناك ؟ السوبر ، أم العادي ، أما الخالي من الرصاص ؟	شو نوع البنزين اللي هناك؟ ممتاز، عادي، ومنقى؟	شو نوع البنزين اللي هناك؟ سوبر، عادي، ولا خالي من الرصاص؟	أم	ولا
8368	corpus-6-test-corpus-26-train	MSA	هنا واحد .	هي واحد.	هون واحد.	هنا	هون
8371	corpus-6-test-corpus-26-train	MSA	أنا مقبل على الإصابة بنوبة برد .	حاسس حالي رح أزكم.	حاسس حالي رح أرشح.	نوبة برد	رشحة
8409	corpus-6-test-corpus-26-test	MSA	إنه مغلق في أيام الاثنين ، ولكن أي يوم آخر سيكون لا بأس به . أعتقد أنه يُفتح من التاسعة حتى الخامسة .	بسكر أيام الإثنين، بس الأيام التانية بكون فاتح. بتوقع أنه بفتح من التسعة للخمسة.	بسكر أيام الإثنين، بس أي يوم ثاني بكون فاتح. بظن أنه بفتح من التسعة للخمسة.	يغلق	بسكر
8418	corpus-6-test-corpus-26-train	MSA	إنه سمك ثعبان مشوي مع مرقة خاصة فوق سلطانية من الأرز .	هاد سمك الانقليس مع صلصة خاصة محطوطة فوق صحن الرز.	هاذ سمك الانقليس مع صلصة خاصة محطوطة فوق سلطانية الرز.	سمك الثعبان	انقليس	موضوعة	محطوطة
8435	corpus-6-test-corpus-26-train	MSA	دعونا نحتفل ، هكذا قال وآخذني إلى بار . وقال إنه سيُجري مكالمة هاتفية وغادر ولم يعد أبداً وتحملت أنا وحدي عبء فاتورة ضخمة .	هو حكى "خلينا تحتفل" هيك وأخدني على البار. حكى انه رايح يعمل مكالمة وراح وما رجع إجى أبداً وأنا تورطت بفاتورة كبيرة.	"خلينا تحتفل" هيك قال وأخذني على البار. حكى انه رايح يعمل مكالمة وراح وما رجع إجى أبداً وأنا تورطت بفاتورة كبيرة.	يجري	يعمل	تحملت	تورطت
8454	corpus-6-test-corpus-26-train	MSA	كم تكلّف هي لكل جالون ؟	كم سعر الغلون الواحد؟	كم سعر الغلون الواحد؟
8456	corpus-6-test-corpus-26-train	MSA	كان معي جواز سفري وبطاقتي الائتمانية في جيبي .	كان معي جواز السفر وبطاقة البنك بشنطتي.	كان معي جواز السفر والفيزا بجيبتي.	جيب	جيبة
8485	corpus-6-test-corpus-26-train	MSA	الحجوزات في السابعة ، تحت اسم مانو .	حجوزات الساعة سبعة، بإسم مانو.	حجوزات الساعة سبعة، بإسم مانو.
8495	corpus-6-test-corpus-26-train	MSA	ألا ترغب في فنجان شاي ؟	ما بدك تشرب كاسة شاي؟	ما بدك تشرب كاسة شاي؟	ترغب	بدك	ألا	ما
8497	corpus-6-test-corpus-26-dev	MSA	هل يمكن أن تدلّني أين أجد القنصلية اليابانية ؟	ممكن تحكيلي وين بقدر ألاقي القنصلية اليابانية؟	ممكن تحكيلي وين بقدر ألاقي القنصلية اليابانية؟	أجد	ألاقي
8509	corpus-6-test-corpus-26-train	MSA	هل هناك طبيب للفندق أو واحد على صلة بالفندق .	في دكتور للفندق أو واحد ممكن نتواصل معاه؟	في دكتور للفندق أو واحد ع علاقة بالفندق؟	صلة	علاقة
8516	corpus-6-test-corpus-26-train	MSA	إنه يقوم دائماً بالتسوق في شارع " بوند " .	هو دايماً بتسوق من شارع بوند.	هو دايماً بتسوق من شارع بوند.	دائماً	دايماً
8527	corpus-6-test-corpus-26-train	MSA	جريدة باللغة الإنجليزية ، لطفاً .	جريدة باللغة الإنجليزي، لو سمحت.	جريدة بالانجليزي، لو سمحت.	لطفاً	لو سمحت
8535	corpus-6-test-corpus-26-train	MSA	هل هناك مكان يتم فيه عزف الموسيقي الريفية ؟	ما في أي مكان بشغل أغاني وطنية؟	ما في أي مكان بعزف ألحان ريفية؟	موسيقى	لحن
8539	corpus-6-test-corpus-26-test	MSA	أودّ مراجعة ممتلكاتي الثمينة .	حابة أشيك على اشيائي الغالية.	حاب أشيك على اشيائي الغالية.	مراجعة	أشيك	ثمين	غالي
8543	corpus-6-test-corpus-26-train	MSA	أي منتجات صوفية أخرى ؟	في أشياء صوف تانية؟	في منتجات صوف ثانية؟
8551	corpus-6-test-corpus-26-train	MSA	كم تكلف الملاءة الواحدة ؟	قديش تكلفة العباية الوحدة؟	كم حق العباية الوحدة؟	ملاءة	عباية
8574	corpus-6-test-corpus-26-train	MSA	حسنا ، اضغط تسعة وصفر واحد واحد ، ثم الكود الخاص بالبلد ورقم الهاتف .	طيب، إكبس تسعة وصفر واحد واحد، وبعدين مفتاح البلد ورقم التلفون.	طيب، إكبس تسعة وصفر واحد واحد، وبعدين الكود تبع البلد ورقم التلفون.	اضغط	إكبس	الخاص	تبع	هاتف : تلفون
8577	corpus-6-test-corpus-26-train	MSA	هل يمكن أن أحصل على كوكاكولا دايت ؟	ممكن تعطيني كولا دايت؟	ممكن تعطيني كولا دايت؟
8584	corpus-6-test-corpus-26-train	MSA	هل بإمكاني إجراء طلبية ؟	ممكن أعمل طلبية؟	بقدر اطلب؟
8595	corpus-6-test-corpus-26-train	MSA	استمتعنا بجولة لطيفة بالسيارة . شكراً لك .	انبسطنا بلفة السيارة. شكراً الك.	انبسطنا بلفة لطيفة بالسيارة. شكراً الك.
8604	corpus-6-test-corpus-26-test	MSA	معذرةً . هل لي بأن انتهي من هذا الأمر ؟	عفواً، ممكن نخلص من هاد الموضوع؟	عفواً، ممكن نخلص من هاد الموضوع؟	معذرة	عفواً
8610	corpus-6-test-corpus-26-train	MSA	إجمالي سكان اليابان حوالي مائة وثلاثين مليوناً .	العدد الكلي لسكان اليابان حوالي مية وثلاثين مليون.	العدد الكلي لسكان اليابان حوالي مية وثلاثين مليون.	إجمالي	كلي
8618	corpus-6-test-corpus-26-train	MSA	أود استئجار شمسية .	بدي استأجر مظلة.	بدي استأجر شمسية.
8625	corpus-6-test-corpus-26-train	MSA	أجل ، وأودّ محاسبة المطلوب هاتفياً على قيمة المكالمة .	صح، وأنا بدي احاسب يلي رنيت عليه على حق المكالمة.	صح، وأنا بدي احاسب يلي رنيت عليه على حق المكالمة.	قيمة	حق
8636	corpus-6-test-corpus-26-train	MSA	محفظة بها مائة دولار وبطاقتان ائتمانيتان .	محفظة فيها مية دولار وبطاقتين إئتمان.	محفظة فيها مية دولار وبطاقتين فيزا.
8637	corpus-6-test-corpus-26-train	MSA	الماء أسخن من اللازم .	المي كثير حامية.	المي كثير حامية.	ساخن	حامي
8675	corpus-6-test-corpus-26-train	MSA	أنت هنا .	إنت هون.	إنت هون.
8688	corpus-6-test-corpus-26-dev	MSA	إبريق من القهوة ، لطفاً .	بكرج قهوة، لو سمحت.	بكرج قهوة، لو سمحت.	إبريق	بكرج
8690	corpus-6-test-corpus-26-train	MSA	غير محتمل بدرجة كبيرة .	مش مرغوب بنسبة كبيرة.	بنطاقش بدرجة كبيرة.	محتمل	بنطاق
8696	corpus-6-test-corpus-26-train	MSA	معدتي تؤلمني بعد الوجبات .	معدتي بتوجعني بعد الأكل.	معدتي بتالمني بعد الوجبات.	تؤلمني	بتألمني
8734	corpus-6-test-corpus-26-train	MSA	عظيم ، ذلك مكان لطيف .	وااااو، هاد مكان حلو.	وااااو، هاذ مكان حلو.	عظيم	وااو
8741	corpus-6-test-corpus-26-train	MSA	ربما كان يعاني سّدَّة تنفسية .	ممكن عنده صعوبة بالتنفس.	ممكن عنده صعوبة بالتنفس.	شدة	صعوبة
8749	corpus-6-test-corpus-26-train	MSA	هل قرّرتَ ؟	أخدت قرار؟	قررت؟
8788	corpus-6-test-corpus-26-train	MSA	إذا كنت تودّ ، بإمكاننا الاستراحة هنا .	إذا إنت حابب، ممكن نستريح هون.	إذا إنت حاب، ممكن نستريح هون.
8791	corpus-6-test-corpus-26-test	MSA	أنا فقدت أثر بريد مسجّل .	ضيعت أثر رسالة مسجلة.	ضيعت أثر رسالة مسجلة.	فقدت	ضعيت
8803	corpus-6-test-corpus-26-train	MSA	ليس بمقدورك تغيير وظيفتك بسهولة .	ما بتقدر تغير شغلك ببساطة.	ما بتقدر تغير شغلك ببساطة.	وظيفتك	شغلك	بسهولة	ببساطة
8805	corpus-6-test-corpus-26-train	MSA	ما هي المحطة التالية ؟	شو المحطة الجاي؟	شو هو الموقف الجاي؟	التالي	الجاي	المحطة	الموقف
8811	corpus-6-test-corpus-26-train	MSA	حسنا ، ولكن ليس منطقة المقاعد المكشوفة . فاليوم شديد الحرارة .	طيب ، بس مش على مكان الكراسي المكشوفة. اليوم كثير شوب.	طيب ، بس مش على مكان الكراسي المكشوفة. اليوم كثير شوب.	منطقة	مكان	شديد الحرارة	شوب
8823	corpus-6-test-corpus-26-dev	MSA	اهبط هنا ، وانتقل إلى الحافلة رقم ستة .	إنزل هون، وروح على باص رقم ستة.	إنزل هون، وروح على باص رقم ستة.	اهبط	إنزل	انتقل	روح
8824	corpus-6-test-corpus-26-dev	MSA	علىّ أن ألحق بطائرة العاشرة صباحاً .	لازم ألحق طيارة الساعة عشرة الصبح.	لازم ألحق طيارة الساعة عشرة الصبح.	طائرة	طيارة
8827	corpus-6-test-corpus-26-train	MSA	مازلت أشعر بالرغبة في القيء .	لسا حاسس حالي بدي أستفرغ.	بعدني حاس حالي بدي أراجع.	أتقيأ	أراجع	ما زلت	بعدني
8833	corpus-6-test-corpus-26-train	MSA	لا أريد أي شيء يكون كبير الحجم .	ما بدي أي اشي ضخم.	ما بدي أي اشي ظخم.
8840	corpus-6-test-corpus-26-train	MSA	الحساب ، من فضلك .	الحساب، لو سمحت.	الحساب، لو سمحت.
8844	corpus-6-test-corpus-26-test	MSA	كم يكلف عش الغراب الطازج ؟	كم سعر الفطر الطبيعي؟	كم سعر الفطر الطازا؟	الطازج	طازا	عش الغراب	فطر
8850	corpus-6-test-corpus-26-train	MSA	التكلفة ، من فضلك . هل تقبلون بطاقة فيزا ؟	الفاتورة، لو سمحت. يتقبلو بطاقة فيزا؟	الحساب ، لو سمحت. يتقبلو بطاقة فيزا؟	التكلفة	الحساب
8851	corpus-6-test-corpus-26-train	MSA	اليوم سأذهب لأرى كيف يبدو الحيّ الصين .	اليوم راح أروح أشوف كيف منظر الحيّ الصين.	اليوم راح أروح أشوف كيف منظر الحيّ الصين.	يبدو	منظر
8880	corpus-6-test-corpus-26-train	MSA	اثنان صفر اثنان تسعة ثلاثة تسعة ستة سبعة صفر صفر .	اثنين صفر اثنين تسعة ثلاثة تسعة ستة سبعة صفر صفر.	اثنين صفر اثنين تسعة ثلاثة تسعة ستة سبعة صفر صفر.
8900	corpus-6-test-corpus-26-train	MSA	أرغب في خلع أسناني .	أنا حابب أخلع سني.	أنا حاب أقلع سناني.	أسناني	سناني
8905	corpus-6-test-corpus-26-train	MSA	أرغب في حقيبة مستحضرات تجميل .	بدي شنتة اغراض تجميل.	بدي شنتة مكياج.	مستحضرات تجميل	مكياج
8907	corpus-6-test-corpus-26-dev	MSA	لا أدري كم من النقود يجب علىّ تركه كبقشيش ؟	ما بعرف قديش لازم أترك بغشيش.	ما بعرف قديش لازم أترك بغشيش.	أدري	بعرف
8914	corpus-6-test-corpus-26-train	MSA	أين يمكنني مشاهدة عَرْض " شبح الأوبرا " ؟	وين ممكن أحضر " شبح الأوبيرا"؟	وين ممكن أحضر عرض" شبح الأوبيرا"؟
8915	corpus-6-test-corpus-26-train	MSA	أريد شراء تذكارات لأصدقائي . أيمكن أن تُوصي ببعض منها ؟	بدي أشتري هدايا تذكارية لأصحابي. ممكن تنصحني بإشي؟	بدي أشتري هدايا تذكارية لأصحابي. ممكن تنصحني بإشي؟	توصي	تنصحني
8918	corpus-6-test-corpus-26-train	MSA	بطريقة أبطأ ، من فضلك .	بشكل أبطأ ، لو سمحت.	بشكل أبطأ ، لو سمحت.
8919	corpus-6-test-corpus-26-dev	MSA	ما هو متوسط أسعاركم للفاكس الدولي كل شهر ؟	كم معدل تكلفة الفاكس الدولي كل شهر؟	كم معدل تكلفة الفاكس الدولي كل شهر؟	متوسط	معدل
8947	corpus-6-test-corpus-26-train	MSA	مقلية على الجانبين ، من فضلك .	مقلي من الجهتين، لو سمحت.	مقلي من الجهتين، لو سمحت.	جانبين	جهتين
8966	corpus-6-test-corpus-26-dev	MSA	حسنا ، هذا يبدو واضحاً تماماً . كلاكما ، رجاءً ، أعطياني ما يخصكما من رُخص وشهادات تسجيل . وأنت يا بُني ، يؤسفني أننا مضطرون لأن نجري لك اختباراً لفحص نسبة الكحول .	طيب، هاد شكله واضح كثير، إنتو الثنين لو سمحتوا أعطوني رخصكم وتسجيلكم. وبالنسبة للولد، اسف لازم نعملك فحص نسبة كحول.	طيب، هاد شكله واضح كثير، إنتو الثنين لو سمحتوا أعطوني رخصكو وتسجيلكو. وأنت يا إبني، اسف لازم نعملك فحص نسبة كحول.	نجري	نعمل	أعطياني	أعطوني
9011	corpus-6-test-corpus-26-train	MSA	سيكون جاهزا بعد غد في المساء .	راح يكون جاهز بعد بكرا المسا.	راح يكون جاهز بعد بكرا المسا.
9022	corpus-6-test-corpus-26-train	MSA	هل هذا مصنوع من القطن ؟	هاد مصنوع من القطن؟	هاذ مصنوع من القطن؟
9029	corpus-6-test-corpus-26-dev	MSA	عندي الدواء الخاص بي .	عندي دوا إلي.	عندي الدوا تاعي.	الخاص بي	تاعي
9034	corpus-6-test-corpus-26-train	MSA	ما الذي يمكن أن أراه في هذه الجولة ؟	شو بقدر أشوف بهاي الرحلة؟	شو بقدر أشوف بهاي الرحلة؟	أرى	أشوف
9041	corpus-6-test-corpus-26-train	MSA	نعم , يوجد مشروب على الأقل .	اه، هون في شراب واحد على الأقل.	اه، هون في شراب واحد على الأقل.	مشروب	شراب
9051	corpus-6-test-corpus-26-train	MSA	ما تكلفة هذا في اليوم ؟	قديش تكلفته ليوم واحد؟	قديش تكلفته ليوم واحد؟
9061	corpus-6-test-corpus-26-dev	MSA	هل تتوقف هذه الحافلة بالقرب من الفندق ؟	هاد الباص بوقف قريب من الفندق؟	هاد الباص بوقف قريب من الفندق؟
9073	corpus-6-test-corpus-26-train	MSA	أريد اسطوانة مدمجة .	بدي سي دي.	بدي سي دي.					إسطوانة مدمجة : سي دي
9077	corpus-6-test-corpus-26-train	MSA	توجد رحلات جوية على شركات جال وانا التي تقلع في الساعة العاشرة وخمسة وخمسين دقيقة . ولكن , للأسف كلتا الرحلتين محجوزتان .	في طيارات على شركات جال وانا بغادرو الساعة عشرة وخمسة وخمسين دقيقة. بس، للأسف الطيارتين مفللات.	في طيارات على شركات جال وانا اللي بتغادر الساعة عشرة وخمسة وخمسين دقيقة. بس، للأسف الطيارتين مفللات.	محجوزتان	مفللات
9094	corpus-6-test-corpus-26-train	MSA	تناسبني تماما .	مناسبيتني كثير.	مناسبيتني كثير.	تماماً	كثير
9098	corpus-6-test-corpus-26-train	MSA	هل يمكن أن نحجز طاولة لخمسة أشخاص ؟	ممكن نحجز طاولة لخمس أشخاص؟	ممكن نحجز طاولة لخمس أشخاص؟
9100	corpus-6-test-corpus-26-train	MSA	إنها لا تفهم الإنجليزية مطلقا .	هي ما بتفهم إنجليزي بالمرة.	هي ما بتفهم إنجليزي بالمرة.	مطلقا	بالمرة	لا	ما
9126	corpus-6-test-corpus-26-dev	MSA	من فضلك , اصرف شيكا سياحيا .	لو سمحت اصرفلي شيك سياحي.	لو سمحت اصرفلي شيك سياحي.
9150	corpus-6-test-corpus-26-train	MSA	هل يمكن أن تعتني بها من الساعة التاسعة صباحا حتى الثالثة ؟	ممكن تعتني فيها من الساعة تسعة الصبح لعند الساعة ثلاثة؟	ممكن ادير بالك عليها من الساعة تسعة الصبح للساعة ثلاثة؟	حتى	ل
9160	corpus-6-test-corpus-26-train	MSA	ما تكلفة البريد الجوي إلى اليابان ؟	قديش تكلفة الإيميل الجوي لليابان؟	قديش تكلفة البريد الجوي لليابان؟
9176	corpus-6-test-corpus-26-train	MSA	لقد أُغلق علي الباب . هل يمكن أن تفتح بابي , من فضلك ؟	أنا إنحبست جوا. بتقدر تفتحلي الباب، لو سمحت؟	ييي تسكر علي الباب . بتقدر تفتحلي الباب، لو سمحت؟	أغلق	تسكر
9211	corpus-6-test-corpus-26-train	MSA	ما هي أفضل جولة حتى أرى أشهر الأماكن ؟	شو هي أحسن رحلة عشان أشوف اكثر الأماكن المشهورة؟	شو هي أحسن رحلة عشان أشوف أشهر الأماكن؟	حتى	عشان
9229	corpus-6-test-corpus-26-test	MSA	هل هناك مضيفات يتحدثن اليابانية ؟	في أي مضيفة بتحكي ياباني؟	في أي مضيفات بحكن ياباني؟	يتحدثن	بحكن
9242	corpus-6-test-corpus-26-test	MSA	كم حقيبة يمكن أن أحضرها معي في الطائرة ؟	كم عدد الشنط اللي ممكن آخدها معي على الطيارة؟	كم شنتة بقدر آخذها معي على الطيارة؟
9263	corpus-6-test-corpus-26-train	MSA	لا يا سيدي . هذه الظهيرة محجوزة بالكامل . ومع ذلك يمكن أن تحجز غدا .	لا، يا أستاذ، اليوم بعد الضهر كله محجوز. لكن بتقدر تحجز بكرا .	لا، يا أستاذ، اليوم بعد الظهر كله محجوز. لكن بتقدر تحجز بكرا .	بالكامل	كله	ظهيرة	الظهر
9267	corpus-6-test-corpus-26-train	MSA	سأذهب كي أسأل البواب عن الأجرة المناسبة .	رايحة اسأل البواب عن الأجرة المزبوطة.	رايح اسأل البواب عن الأجرة الصحيحة.	مناسبة	صحيحة
9303	corpus-6-test-corpus-26-train	MSA	أنا حقا آسف .	أنا جد آسفة.	أني جد آسف.	حقا	جد
9308	corpus-6-test-corpus-26-train	MSA	عندنا حفلة مساء الجمعة . لماذا لا تنضم لنا ؟	عنا حفلة يوم الجمعة بالليل. ليش ما تيجي؟	عنا حفلة يوم الجمعة بالليل. ليش ما تيجي معنا؟	تنضم	تيجي
9312	corpus-6-test-corpus-26-train	MSA	حسنا , حجرتك يا آنسة هي رقم تسعة صفر ثمانية . هذا مفتاحك .	طيب، غرفتك يا آنسة هي تسعة صفر ثمانية. هاد مفتاحك.	طيب، غرفتك يا آنسة هي تسعة صفر ثمنية. هاذ مفتاحك.	حجرتك	غرفتك
9316	corpus-6-test-corpus-26-dev	MSA	من المهم جدا أننا نستطيع الوصول إلى المواد الخام التي نحتاجها في المشروع .	اشي كثير مهم إنه قدرنا نوصل لمجموعة المواد الخام اللي راح نحتاجها للمشروع.	اشي كثير مهم إنه قدرنا نوصل لمجموعة المواد الأساسية اللي راح نحتاجها للمشروع.	خام	أساسية
9324	corpus-6-test-corpus-26-train	MSA	معذرة , ضابط ؟	عفواً، إنت ضابط؟	عفواً، ضابط؟
9325	corpus-6-test-corpus-26-train	MSA	هل هذا القطار يتجه مباشرة إلى إدنبره ؟	هاد القطار بروح مباشرة على إدنبره؟	هاد القطار بروح مباشرة على إدنبره؟	يتجه	بروح
9329	corpus-6-test-corpus-26-train	MSA	هل يدخل هذا في حدود المعفي من الضرائب ؟	هاد معفي من الضرائب؟	هاظ معفي من الضرايب؟	ضرائب	ضرايب
9337	corpus-6-test-corpus-26-train	MSA	أخرج متعلقاتي الثمينة , من فضلك .	خد اشيائي الغالية برا، لو سمحت.	طلع اشيائي الغالية برا، لو سمحت.	أخرج	طلع	متعلقاتي	أشيائي
9358	corpus-6-test-corpus-26-train	MSA	كيف يكون الزحام في مثل تلك الجولات ؟	قديش فيه ناس في مثل هاي الرحلات؟	قديش بكون في زحمة في مثل هاي الرحلات؟	زحام	زحمة
9367	corpus-6-test-corpus-26-train	MSA	أود أن أشتري بعض التذكارات . هل يوجد هنا محل مناسب ؟	أنا حابب أشتري شوية هدايا تذكارية. في محل مناسب قريب من هون؟	أني حاب أشتري شوية هدايا تذكارية. في محل مناسب قريب من هون؟
9372	corpus-6-test-corpus-26-train	MSA	إلى متى تظل مفتوحة ؟	لأي ساعة بضل فاتح؟	لأي ساعة بتظل فاتحة؟	مفتوحة	فاتحة
9384	corpus-6-test-corpus-26-train	MSA	إنه في الخارج الآن .	هو مش هون هسا.	هو برا هسا.	خارج	برا
9385	corpus-6-test-corpus-26-train	MSA	مايومي , هل تسمح أن تملأ هذه الورقة بتوقيعك ؟	مايومي، ممكن تعبيي هاي الورقة بتوقيعك؟	مايومي، ممكن تعبيي هاي الورقة بتوقيعك؟
9431	corpus-6-test-corpus-26-train	MSA	إليك إحداها يا سيدي .	هي واحده إلك يا أستاذ.	هي واحده إلك يا أستاذ.	إحداها	وحدة
9432	corpus-6-test-corpus-26-train	MSA	ليس لدي أمتعة للتفتيش .	ما عندي شناتي للتفتيش.	ما عندي شناتي للتفتيش.	أمتعة	شناتي
9446	corpus-6-test-corpus-26-test	MSA	بالتأكيد , كن على راحتك .	أكيد، خد وقتك.	أكيد، كون على طبيعتك	كن	كون
9450	corpus-6-test-corpus-26-train	MSA	أنا هنا في مهمة إعلامية .	أنا هون بشغل إعلامي.	أنا هون بشغل إعلامي.	مهمة	شغل
9463	corpus-6-test-corpus-26-train	MSA	هل لديكم أفلام للصيف ؟	عندكم أفلام للصيف؟	عندكو أفلام للصيف؟	لديكم	عندكو
9481	corpus-6-test-corpus-26-train	MSA	متى يأتي القطار التالي المتجه إلى واشنطن العاصمة ؟	متى بوصل القطار الجاي لواشنطن العاصمة؟	متى بوصل القطار الجاي اللي رايح لواشنطن العاصمة؟	متجه	رايح
9494	corpus-6-test-corpus-26-test	MSA	الملابس الطويلة هي الموضة الآن .	اللوعي الطويلة هي الموضة هسا.	الأواعي الطويلة هي الموظا هسا.	ملابس	أواعي	موضة	موظا
9516	corpus-6-test-corpus-26-train	MSA	سأعود إلى اليابان الاثنين المقبل .	أنا راح أرجع على اليابان الإثنين الجاي.	أنا راح أرجع على اليابان الإثنين الجاي.	المقبل	الجاي	أعود	أرجع
9526	corpus-6-test-corpus-26-train	MSA	هل يمكنني الحصول على خريطة للمترو ؟	ممكن أشوف خريطة القطار؟	ممكن أشوف خريطة للمترو؟
9542	corpus-6-test-corpus-26-train	MSA	هل هو طريق طويل ؟	هاد المشوار بعيد؟	هو الطريق طويل؟
9560	corpus-6-test-corpus-26-train	MSA	هل يمكنك تبديل هذه بواحدة جديدة ؟	ممكن تبدلي هاي بوحدة جديدة؟	ممكن تبدلي هاي بوحدة جديدة؟
9576	corpus-6-test-corpus-26-train	MSA	شخصان .	شخصين.	شخصين.
9579	corpus-6-test-corpus-26-test	MSA	أين يمكنني أن أستعيد أمتعتي ؟	من وين بقدر آخد شنتاتي؟	من وين بقدر آخذ شنتاتي؟	أستعيد	آخذ
9581	corpus-6-test-corpus-26-train	MSA	لا أشعر براحة . هل يمكنني حني مقعدي ؟	حاسس حالي مش تمام. ممكن أمدد الكرسي تبعي؟	مش مرتاح . بقدر أنزل الكرسي تبعي؟	حني	أنزل
9604	corpus-6-test-corpus-26-train	MSA	الساعة الحادية عشر وخمس وأربعون دقيقة في الصباح .	الساعة احدعشوخمس واربعين دقيقة في الصبح.	الساعة احدعشروخمس واربعين دقيقة في الصبح.
9605	corpus-6-test-corpus-26-train	MSA	هلا أرشدتني إلى مطعم مفضل بين الشبان ؟	ممكن تحكيلي مطعم معروف بين الشباب؟	ممكن ادلني على مطعم معروف بين الشباب؟	شبان	شباب	أرشدتني	ادلني
9606	corpus-6-test-corpus-26-train	MSA	كانت سيارته تسير بكامل سرعتها .	سيارته كانت ماشية على اعلى سرعة.	سيارته كانت ماشية على اعلى سرعة.
9611	corpus-6-test-corpus-26-dev	MSA	هل بإمكاني ترك رسالة ؟ إنني أتصل للتأكيد على موعدي مع السيد إيبرت الأربعاء المقبل في الحادية عشرة صباحاً .	ممكن أترك رسالة؟ أنا بتصل عشان اأكد على موعدي مع الأستاذ إيبرت يوم الأربعاء الجاي الساعة احدعش الصبح.	ممكن أترك رسالة؟ أنا بتصل عشان اأكد على موعدي مع الإستاذ إيبرت يوم الأربعاء الجاي الساعة احدعش الصبح.	السيد	الإستاذ
9628	corpus-6-test-corpus-26-dev	MSA	هل يمكنك بطريقة ما أن تصف لي مرضك بالإنجليزية ؟	بتقدر بأي طريقة تشرح عن مرضك بالإنجليزي؟	بتقدر بأي طريقة تشرحلي مرضك بالإنجليزي؟	تصف	تشرح
9634	corpus-6-test-corpus-26-test	MSA	هلا أرسلت تاكسي إلى المدخل الرئيسي لـ ويستمانستر مول ؟	ممكن تبعث تاكسي للبوابة الرئيسة في ويستمانستر مول؟	ممكن تودي تكسي للمدخل الرئيسي بويستمانستر مول؟	ترسل	تودي
9651	corpus-6-test-corpus-26-train	MSA	كم عدد المرات التي سأغير فيها القطارات للوصول إلى هناك ؟	كم مرة غيرت القطار عشان توصل هناك؟	كم قطار رح اركب عشان أوصل هناك؟	أصل	أوصل
9657	corpus-6-test-corpus-26-train	MSA	هل هذا صواب ؟ دعني أتحقق . أوه ، أسف بشدة آنسة تاكاناو . هذا خطأنا . إليك فاتورتك الجديدة . هلا تفضلت بالتوقيع هنا ، من فضلك ؟	هاد صح؟ خليني اتأكد. أووه، أنا جد آسف، انسة تاكاناو. هاد غلطنا. هون فاتورتك الجديدة. ممكن توقعي هون، لو سمحتي؟	هاد صح؟ خليني اتأكد. أووه، أنا جد آسف، انسة تاكاناو. هاد غلطنا. هون فاتورتك الجديدة. ممكن توقعي هون، لو سمحتي؟
9673	corpus-6-test-corpus-26-train	MSA	الباقي خمسة دولارات ، من فضلك .	رجع خمسة دولار، لو سمحت.	الباقي خمس دولرات، لو سمحت.
9683	corpus-6-test-corpus-26-train	MSA	سدادة حوض الاستحمام لا تقفل بالكامل .	سدادة البانيو ما بتسكر على الأخير.	سدادة البانيو ما بتسكر على الأخير.	تقفل	تسكر	بالكامل	علأخير	حوض استحمام :بانيو
9687	corpus-6-test-corpus-26-train	MSA	إنها مجرد هدية تعبيرا عن تقديري .	هاي عبارة عن هدية بتبين تقديري.	هاي مجرد هدية تعبير عن تقديري.
9688	corpus-6-test-corpus-26-train	MSA	هلا ملأت هذا النموذج ؟	ممكن تعبي هاد النموذج؟	ممكن تعبي هاذ النموذج؟
9695	corpus-6-test-corpus-26-test	MSA	ماذا عن هذه النماذج البلاستيكة ؟	شو رأيك بموديلات البلاستك هاي؟	شو رأيك بموديلات البلاستك هاي؟	نماذج	موديلات
9701	corpus-6-test-corpus-26-train	MSA	ما هي الماركات التي توجد لديك ؟	شو الماركات اللي عندك؟	شو الماركات اللي عندك؟
9702	corpus-6-test-corpus-26-train	MSA	الكعب عالي جدا بالنسبة لي .	هاد الكعب كثير عالي بالنسبة إلي.	هاد الكعب كثير عالي بالنسبة إلي.
9710	corpus-6-test-corpus-26-test	MSA	اقفل الباب من الداخل وأنا خارج الغرفة .	سكر الباب من جوا وانا طالع من الغرفة.	سكر الباب من جوا وانا طالع من الغرفة.
9730	corpus-6-test-corpus-26-train	MSA	كم المدة التي قضيتها في باريس ؟	قديش إلك في باريس؟	قديش قعدت بباريس؟	قضيت	قعدت
9732	corpus-6-test-corpus-26-train	MSA	هل يمكنني الحصول على طوابع بريدية لثلاث بطاقات بريدية جوية لليابان ؟	ممكن آخد طوابع بريد لثلث إيميلات بالبريد الجوي على اليابان؟	ممكن أوخذ طوابع بريد لثلث رسايل بالبريد الجوي على اليابان؟	رسائل	رسايل
9746	corpus-6-test-corpus-26-train	MSA	تتهجي جي أوه آر أوه اتش .	بتنلفظ ج-و-ر-و-ه.	بتنلفظ جي أوه آر أوه اتش.	تتهجي	بتنلفظ
9747	corpus-6-test-corpus-26-train	MSA	هل تبغي شراباً ؟	بتحب تشرب إشي؟	بتحب تشرب إشي؟	تبغي	بتحب
9748	corpus-6-test-corpus-26-train	MSA	استلقي هنا .	تمدد هون.	تمدد هون.	استلقي	تمدد
9752	corpus-6-test-corpus-26-train	MSA	اجعلها برقية عاجلة ، من فضلك .	خليها رسالة عاجلة، لو سمحت.	خليها رسالة عاجلة، لو سمحت.	برثية	رسالة
9788	corpus-6-test-corpus-26-train	MSA	طبقاً لتقرير الطقس ، فإن غداً سيشهد سقوط جليد .	بناءً على النشرة الجوية، راح تثلج بكرا.	بناءً على النشرة الجوية، راح تثلج بكرا.	طبقاً	بناءً	تقرير	نشرة
9792	corpus-6-test-corpus-26-train	MSA	أبغي كرة .	بدي طابة.	بدي طابة.	أبغي	بدي
9822	corpus-6-test-corpus-26-train	MSA	بكل تأكيد . سنكون سعداء لفعل هذا .	أكيد. راح نكون مبسوطين نعمل هيك.	أكيد. راح نكون مبسوطين نعمل هيك.	سعداء	مبسوطين
9829	corpus-6-test-corpus-26-train	MSA	هاي ، كتاب كوميدي ماليزي . سأشتري واحداً لآخذه إلى المنزل كقطعة محادثة .	شوي، كتاب ماليزي كوميدي. راح أشتري واحد عشان آخده على البيت مثل كتاب محادثة.	هاي، كتاب ماليزي كوميدي. راح أشتري واحد عشان آخذه على الدار مثل كتاب محادثة.	المنزل	الدار
9862	corpus-6-test-corpus-26-train	MSA	الطريق إلى النجاح هو " جينمياكو " حقاً ؟	الطريق للنجاح ل " جينمياكو"، صح؟	الطريق للنجاح ل " جينمياكو"، صح؟	حقاً	صح
9866	corpus-6-test-corpus-26-dev	MSA	سأصل إلى فندقكم في حوالي الساعة التاسعة مساءاً .	راح أوصل لفندقكم حوالي الساعة تسعة بالليل.	راح أوصل لفندقكم حوالي الساعة تسعة بالليل.	مساء	بالليل
9885	corpus-6-test-corpus-26-train	MSA	يوجد لدى حوالي ألفي وخمسمائة دولار بالين الياباني .	أنا معي حوالي ألفين وخمسميت دولار بالين الياباني.	أنا معي حوالي ألفين وخمسميت دولر بالين الياباني.	لدي	معي
9903	corpus-6-test-corpus-26-train	MSA	نعم ، نحن تفعل . سأريك بعضاً .	اه، إحنا منعمل. راح أورجيك شوي.	اه، إحنا منعمل. راح أورجيك شوي.	بعض	شوي
9906	corpus-6-test-corpus-26-train	MSA	أبغي بعض الأقراص المنومة .	بدي حبوب منومة.	بدي حبوب منوم.	أقراص	حبوب
9910	corpus-6-test-corpus-26-train	MSA	سأكون هنا حتى التاسعة . يحدوني الأمل أن تتمكن من القبض على المجرم في أقرب وقت ممكن .	راح أضل هون لحتى تسعة الشهر. بتمنى إنكم تلاقوا المجرم بأسرع وقت.	راح أظل هون للساعة تسعة. بتمنى إنكم تمسكوا المجرم بأسرع وقت.	تقبض	تمسك
9945	corpus-6-test-corpus-26-train	MSA	إنني على يقين أن المجرم قريب .	أنا متأكد إنه المجرم قريب.	أنا متأكد إنه المجرم قريب.
9948	corpus-6-test-corpus-26-train	MSA	عشرة طوابع من فضلك .	عشر طوابع لو سمحت.	عشر طوابع لو سمحت.
9949	corpus-6-test-corpus-26-train	MSA	أصبت بالتهاب في الحلق .	صار عندي إلتهاب بالحلق.	التهب حلقي .
9955	corpus-6-test-corpus-26-train	MSA	احتاج إلى بعض الهدايا التذكارية من نيويورك .	أنا بدي شوية هدايا تذكارية من نيويورك.	أنا بدي شوية هدايا تذكارية من نيويورك.
9969	corpus-6-test-corpus-26-train	MSA	إنني أسجل لخروجي من الفندق . هلا أرسلت خادماً إلى أعلى ؟	أنا عم بعمل تشيك اوت. ممكن تجيب حمال؟	أني بعمل تشيك اوت. ممكن تودي عامل لفوق؟	خادم	عامل	أعلى	فوق	تسجيل خروج : تشيك اوت
9979	corpus-6-test-corpus-26-train	MSA	توقفت ساعتي .	ساعتي وقفت.	ساعتي وقفت.
9983	corpus-6-test-corpus-26-train	MSA	أوه ، أهي كذلك ؟ كيف تفضلها ؟	أووه، هاد هو؟ كيف حبيته؟	أووه، هي هيك؟ كيف بتحبها؟	تفضلها	بتحبها	كذلك	هيك
10006	corpus-6-test-corpus-26-train	MSA	نحن نفتح في التاسعة صباحاً .	إحنا منفتح الساعة تسعة الصبح.	إحنا منفتح الساعة تسعة الصبح.
10032	corpus-6-test-corpus-26-train	MSA	أريد كتاب تلوين .	بدي كتاب تلوين.	بدي دفتر تلوين.	كتاب	دفتر
10037	corpus-6-test-corpus-26-train	MSA	أظن أنني مصاب بدوار الجو جواً .	بتوقع إنه إجتني دوخة الطيارة.	بتوقع إنه عندي دوخة بسبب الطيارة.	دوار	دوخة
10043	corpus-6-test-corpus-26-train	MSA	هل يجب أن أذهب على بنك ياباني ؟	لازم أروح على بنك ياباني؟	لازم أروح على بنك ياباني؟	أذهب	أروح
10045	corpus-6-test-corpus-26-train	MSA	يجب أن تغير النقود من البنك .	إنت لازم تصرف المصاري من البنك.	إنت لازم تصرف المصاري من البنك.	تغير	تصرف	نقود	مصاري
10065	corpus-6-test-corpus-26-train	MSA	هل لدينا وقت كاف لإنهاء إجراءات المغادرة ؟	ضايل معنا وقت منيح لنسجل خروج؟	معنا وقت كافي لنخلص إجراءات المغادرة؟	كاف	كافي	إنهاء	نخلص
10069	corpus-6-test-corpus-26-train	MSA	زوجك أحد أفضل عملائنا .	زوجك واحد من أهم زباينا.	جوزك واحد من أهم زباينا.	عملاء	زباين	أفضل	أهم
10078	corpus-6-test-corpus-26-train	MSA	هل تعرف طبيب أسنان جيد ؟	بتعرف دكتور أسنان كويس؟	بتعرف دكتور اسنان كويس؟	جيد	كويس
10084	corpus-6-test-corpus-26-train	MSA	أوه ، يجب أن تخطر القنصلية على الفور .	أوه، لازم تبلغ القنصلية هسا.	أوه، لازم تبلغ القنصلية هسا.	تخطر	تبلغ
10091	corpus-6-test-corpus-26-train	MSA	مهزوز ، وليس مضروب .	محرك، مش مخفوق.	محرك، مش مخفوق.	مضروب	مخفوق
10098	corpus-6-test-corpus-26-dev	MSA	هل تود منضدة في المطعم الرئيسي أو في غرفة خاصة يا سيدي ؟	سيدي، بتحب طاولة بالمطعم الرئيسي وإلا بغرفة خاصة؟	سيدي، بتحب طاولة بالمطعم الرئيسي ولا بغرفة خاصة؟	منضدة	طاولة
10102	corpus-6-test-corpus-26-train	MSA	يذهب عدد كبير من الناس إلى الشاطئ خلال الموسم .	أعداد كبيرة من الناس بروحوا على الشط خلال هاد الفصل.	عدد كبير من الناس بروحوا على الشط خلال الموسم.
10107	corpus-6-test-corpus-26-train	MSA	وزني حوالي مائة وخمسين رطلاً .	وزني حوالي مية وخمسين رطل.	وزني حوالي مية وخمسين كيلو.	رطل	كيلو
10111	corpus-6-test-corpus-26-train	MSA	إلى أين يجب علي أن أنقل ؟	من وين بقدر أحول؟	لوين لازم أحول؟	أنقل	أحول
10114	corpus-6-test-corpus-26-train	MSA	أين مكتب الأشياء المفقودة .	وين مكتب الممتلكات المفقودة؟	وين مكتب الأشياء المفقودة؟
10116	corpus-6-test-corpus-26-train	MSA	هل هناك حافلة تذهب مباشرة إلى هناك ؟	في أي باص بروح هناك مباشرة؟	في أي باص بروح هناك مباشرة؟
10125	corpus-6-test-corpus-26-train	MSA	هل أحتاج لعلاج خاص ؟	انا بحاجة علاج خاص؟	انا بحاجة علاج خاص؟
10129	corpus-6-test-corpus-26-train	MSA	هل سأدفع نقداً أم يضاف على الفاتورة ؟	راح ادفع كاش ولا بتزيده عالفاتورة؟	راح ادفع كاش ولا بنزاد عالفاتورة؟	يضاف	بنزاد
10134	corpus-6-test-corpus-26-test	MSA	انتقلنا إلى هذا المنزل منذ عام .	رحلنا لهاد البيت من سنة.	رحلنا لهاظ البيت من سنة.	انتقلنا	رحلنا
10155	corpus-6-test-corpus-26-train	MSA	كم سيستغرق إصدار التأشيرة لي ؟	قديش الفيزا بدها وقت عشان تطلع؟	قديش الفيزا بدها وقت عشان تطلع؟	تصدر	تطلع			تأشيرة : فيزا
10156	corpus-6-test-corpus-26-train	MSA	أين غرف الراحة ؟	وين الحمامات؟	وين الحمامات؟
10160	corpus-6-test-corpus-26-train	MSA	إجمالي المبلغ المطلوب مائتان وثلاثة وأربعون جنيه ، يا سيدتي .	المجموع الكلي بطلع ميتين وتلاتة وأربيعين جنيه، يا مدام.	المبلغ الكلي بطلع ميتين وثلاثة وأربيعين جنيه، يا مدام.	سيدة	مدام	إجمالي	كلي
10164	corpus-6-test-corpus-26-train	MSA	هذه هدية ، هل يمكن أن تلفها لي في ورق لف جميل ؟	هاي هدية. ممكن تلفها بشوية ورق هدايا حلو؟	هاي هدية. ممكن تلفها بورق هدايا حلو؟	جميل	حلو
10182	corpus-6-test-corpus-26-train	MSA	ياله من منظر . إنها مسالك رائعة الجمال .	وجهة نظر حلوة. طرق رائعة الجمال.	ما أحلى المنظر . طرق رائعة الجمال.	مسالك	طرق
10187	corpus-6-test-corpus-26-dev	MSA	لقد أصيب أناس .	في ناس إنصابوا.	في ناس إنصابوا.	أصيب	إنصاب
10191	corpus-6-test-corpus-26-dev	MSA	معذرة . أين المحطة هنا ؟	عفواً، وين في محطة قريبة من هون؟	عفواً، وين المحطة اللي هون؟	التي	اللي
10224	corpus-6-test-corpus-26-train	MSA	نعم ، لدينا حجز لك .	مزبوط، عنا حجز إلك.	مزبوط، عنا حجز إلك.	لدينا	عنا	صحيح	مزبوط
10238	corpus-6-test-corpus-26-train	MSA	معذرة أريد الذهاب إلى فندقي في المدينة بالحافلة . أين يمكن أن أستقل حافلة ؟	عفواً، أنا بدي أروح على الفندق موجود بالمدينة بالباص. من وين بقدر آخد باص؟	عفواً، أنا بدي أروح على الفندق موجود بالمدينة بالباص. من وين بقدر آخذ باص؟	أستقل	آخذ
10243	corpus-6-test-corpus-26-test	MSA	دجاج ، من فضلك .	دجاج، لو سمحت.	جاج، لو سمحت.	دجاج	جاج
10257	corpus-6-test-corpus-26-train	MSA	هذه الغرفة اثنان صفر واحد . أريد أن أطلب إفطار الغد .	هاي الغرفة رقم اتنين صفر واحد. بدي أطلب فطور بكرا.	هاي الغرفة رقم اثنين صفر واحد. بدي أطلب فطور بكرا.	إفطار	فطور
10272	corpus-6-test-corpus-26-test	MSA	ما رأيك في موضوع التحرش الجنسي في مكان العمل ؟	شو رأيك بالتحرشات الجنسية اللي بتصير في مكان الشغل؟	شو رأيك بالتحرشات الجنسية اللي بتصير بمكان الشغل؟	عمل	شغل
10318	corpus-6-test-corpus-26-dev	MSA	عندي شقيقتان .	عندي أختين.	عندي أختين.	شقيقة	أخت
10336	corpus-6-test-corpus-26-dev	MSA	رقم الرحلة اثنان صفر ثمانية ، إلى طوكيو .	رحلة رقم اتنين صفر تمنية، لطوكيو.	رحلة رقم اثنين صفر ثمنية، لطوكيو.	إلى	ل
10354	corpus-6-test-corpus-26-train	MSA	إذن دعنا نبطنها من الداخل .	معنلته خلينا نحشيها من جوا.	معناته خلينا نحشيها من جوا.	داخل	جوا	نبطنها	نحشيها
10366	corpus-6-test-corpus-26-test	MSA	دعنا نجتمع لنبحث الأمر أكثر .	خلينا نلتقي عشان اناقش هاد الموضوع أكتر.	خلينا نلتقي عشان اناقش هاظ الموضوع أكثر.	نجتمع	نلتقي	الأمر	الموضوع
10372	corpus-6-test-corpus-26-train	MSA	كيف تحب أن يصفف شعرك اليوم ؟	كيف بدك أعملك شعرك اليوم؟	كيف بدك يسرحلك شعرك اليوم؟	يصفف	يسرح	تحب	بدك
10403	corpus-6-test-corpus-26-train	MSA	هل يمكن أن تقول لي ذلك بعبارة أخرى ؟	بتقدر تحكيه بمعنى تاني؟	بتقدر تحكيه بجملة غير؟	أخرى	غير	عبارة	جملة
10408	corpus-6-test-corpus-26-train	MSA	سوف استخدم ما يوجد عندكم .	راح أعمله بأي إشي عندك.	رح استخدم اللي موجود عندكو.	ما	اللي	عندكم	عندكو
10411	corpus-6-test-corpus-26-train	MSA	نريد مائدة بالقرب من المسرح .	بدنا طاولة قريبة من المسرح.	بدنا طاولة قريبة من المسرح.		بدنا طاولة قريبة عن المسرح.
10416	corpus-6-test-corpus-26-train	MSA	أنا بحالة جيدة . حسنا , هل أنت ذاهب إلى مكان ما ؟	أنا منيح. طيب، انت رايح مكان؟	أنا مليح. طيب، انت رايح مكان؟		أنا مرتاح. زين, رايح على وين؟
10433	corpus-6-test-corpus-26-train	MSA	إن ارتفاعه ألفان وأربعمائة متر .	إرتفاعه ألفين وأربعمية متر.	إرتفاعه ألفين وأربعمية متر.		إنو ارتفاعه ألفين وأربعمية متر.
10435	corpus-6-test-corpus-26-train	MSA	ادخل . من فضلك ضعها على المائدة هناك .	تفضل. لو سمحت حطه على الطاولة هناك.	تفضل. لو سمحت حطه على الطاولة هناك.		أدخل. لو سمحت حطها على الطاولة هنيك.
10440	corpus-6-test-corpus-26-train	MSA	من فضلك الغي رقم بطاقتي .	لو سمحت إلغي رقم بطاقتي.	لو سمحت إلغي رقم بطاقتي.		من فضلك إلغي رقم البطاقة حقي.
10468	corpus-6-test-corpus-26-train	MSA	آسف لقد نفدت ، لكن سوف تردنا بعد بضعة أيام .	أنا آسف، خلصوا، بس راح يكونوا عنا خلال كم يوم.	أنا آسف، خلصوا، بس راح يكونوا عنا خلال كم يوم.		معذرة, صارت خلصت، بس رح يرجعوها بعد يومين أو تلاتة.
10473	corpus-6-test-corpus-26-test	MSA	هل يمكن أن أخذ بعض القهوة ؟	ممكن أطلب قهوة؟	ممكن قهوة؟		ممكن أخذ شوية قهوة؟
10477	corpus-6-test-corpus-26-train	MSA	ليس لدي موعد ، لكن الأمر عاجل .	ما عندي موعد، بس كتير الموضوع ضروري.	ما عندي موعد، بس كثير الموضوع ضروري.		ما عندي موعد، بس الأمور ضرورية.
10479	corpus-6-test-corpus-26-train	MSA	إنه رديء الصنع .	هاد صناعته بتخزي.	هاظ صناعته بتخزي.		هو مش صنوع منيح.
10480	corpus-6-test-corpus-26-train	MSA	أين المصعد ؟	وينالاصنصير؟	وين الاصنصير؟		وين الأسانسير؟
10497	corpus-6-test-corpus-26-train	MSA	هل لديكم كتيب حول العروض ؟	عندك دفترفيه العروض؟	عندك دفترفيه العروض؟		عندكم كتالوج على العروض؟
10500	corpus-6-test-corpus-26-train	MSA	أين مدخل مترو الأنفاق ؟	وين مدخل القطار؟	وين مدخل القطار؟		وين دخلة المترو؟
10504	corpus-6-test-corpus-26-train	MSA	لقد أضعت تذكرة الطيران الخاصة بي .	ضيعت تذكرة الطيران.	ضيعت تذكرة الطيران.		انا ضايع تذكرة الطيران حقتي.
10559	corpus-6-test-corpus-26-train	MSA	ألا تستطيع البقاء هنا خلال الإجازة ؟	بتقدرش تضلك هون خلال العطلة؟	بتقدرش تضلك هون خلال العطلة؟		ما بتقدر تضل هون خلال العطلة؟
10562	corpus-6-test-corpus-26-train	MSA	أوه ، آسف لأني أزعجتك .	أووه، أنا آسف لأنه أزعجتك.	أنا آسف لأني أزعجتك.		اووه، معذرة الك ازعجتك.
10563	corpus-6-test-corpus-26-dev	MSA	هل يمكن أن تحجزوا في العرض ؟	بتقدر تحجزلي في العرض؟	بتقدر تحجزلي في العرض؟		ممكن تحجزولي بالعرض؟
10565	corpus-6-test-corpus-26-train	MSA	هل توجد غرفة استراحة عامة بالقرب من هنا ؟	في حمام عام قريب من هون؟	في استراحة قريبة من هون		في غرفة استراحة عامة جنبنا هون؟
10590	corpus-6-test-corpus-26-train	MSA	ما هو الإجمالي ؟	شو المجموع؟	شو المجموع؟		شو الإجمالي؟
10593	corpus-6-test-corpus-26-train	MSA	هذا جيد للغاية . والآن الأسئلة ، من فضلك .	هيك كتير كويس، هلأ للاسئلة، لو سمحت.	هيك كتير كويس، هسع الاسئلة، لو سمحت.		هاي زينة كتير. هسا الأسئلة، لو سمحت.
10599	corpus-6-test-corpus-26-train	MSA	هل لديك أية فكة لعداد الانتظار ؟	عندك فراطة عشان عداد الباركينج؟	عندك فراطة عشان عداد الباركينج؟		عندك عملة للبارك ميتر؟
10617	corpus-6-test-corpus-26-test	MSA	أكثر منتجاتنا بيعت عبر السنوات الأربع الماضية هي الآلة الناسخة طراز أ . أكس أربعة خمسة صفر .	أحسن مبيعاتنا خلال آخر أربع سنين آلة التصوير ايه اكس أربعمية وخمسين.	أحسن بيعنا خلال الاربع سنوات الماضية كان كاميرا نوع ايه اكس أربعمية وخمسين.		أغلب اللي بعناه من منتجاتنا على مرّ الأربع سنين اللي فاتت هي الآلة الناسخة، طراز أ . أكس أربعة خمسة صفر.
10645	corpus-6-test-corpus-26-train	MSA	هل انعطف يساراً ؟	أروح على اليسار؟	أروح على اليسار؟		بدي ألف يمين؟
10662	corpus-6-test-corpus-26-test	MSA	هل توجد مضيفات يتحدثن اليابانية ؟	في أي مضيفات بيحكوا ياباني؟	في مضيفات بحكن ياباني ؟		فيه مضيفات بتحكي ياباني؟
10670	corpus-6-test-corpus-26-train	MSA	سعر رائع ، أليس كذلك ؟	سعر حلو، صح؟	سعر حلو، صح؟		سعر حلو، مو هيك؟
10680	corpus-6-test-corpus-26-train	MSA	لابد أن تأخذها تسعة وتسعون مرة في اليوم ، قبل الوجبات .	لازم تاخده تسعة وتسعين مرة في اليوم، قبل الوجبة.	لازم توخذه تسعة وتسعين مرة في اليوم، قبل الاكل.		لازم تاخذها تسعة وتسعين مرة باليوم، قبل الأكل.
10707	corpus-6-test-corpus-26-train	MSA	أحبه فعلاً .	بحبه عنجد.	بحبه عنجد.		بحبه فعلا.
10733	corpus-6-test-corpus-26-train	MSA	أريد حامل ثلاثي .	بدي قاعدة ثلاثية.	بدي قاعدة ثلاثية.		بدي حامل ثلاثي.
10736	corpus-6-test-corpus-26-dev	MSA	أريد سترة رياضية .	بدي جاكيتات رياضة.	بدي جاكيت رياضة.		بدي جاكيت رياضي.
10749	corpus-6-test-corpus-26-dev	MSA	يمكنك أن تمكث في منزلي .	بتقدر تضلك في بيتي.	بتقدر تضل في بيتي.		ممكن تفضل تقعد ببيتي.
10753	corpus-6-test-corpus-26-test	MSA	هل يمكن أن أرجع ظهر مقعدي إلى الخلف ، من فضلك .	ممكن أرجع الكرسي لورا، لو سمحت؟	بقدر أرجع الكرسي لورا، لو سمحت؟		بتقدر تدير ظهر كرسيي لورا، لو سمحت؟
10756	corpus-6-test-corpus-26-train	MSA	عظيم . كنت أبحث عن سيارة أجرة لكن هذا أفضل .	ممتاز. أنا كنت بستنا تاكسي، بس هاد أحسن.	ممتاز. أنا كنت بستنا تاكسي، بس هاظ أحسن.		كتير حلو. كنت قاعد بدور على تاكسي بس هاي احسن.
10760	corpus-6-test-corpus-26-train	MSA	معطف رائع . هل هو صناعة بريطانية ؟	كبوت بجنن. هاد صناعة بريطانية؟	كبوت بجنن. هاظ صناعة بريطانية؟		جاكيت حلو. هاد صنع بريطاني؟
10778	corpus-6-test-corpus-26-train	MSA	أريد الذهاب إلى مركز هارفارد . هل يمكن أن تخبرني عندما نصل إلى هناك ؟	أنا بدي أروح على مركز هارفارد. ممكن تحكيلي لما نصل هناك؟	أنا بدي أروح على مركز هارفارد. ممكن تحكيلي لما نصل هناك؟		بدي اروح على مركز هارفارد. ممكن تقلي لما نوصل هناك؟
10790	corpus-6-test-corpus-26-train	MSA	بالغان وطفلان ، من فضلك .	اتنين كبار واتنين أطفال، لو سمحت.	اثنين كبار واثنين صغار، لو سمحت.		رجالين وضوجين، لو سمحت.
10817	corpus-6-test-corpus-26-train	MSA	ما هو السعر ؟	شو السعر؟	شو السعر؟		شو السعر؟
10824	corpus-6-test-corpus-26-train	MSA	كان فيلم " حرب الكواكب " أكثر الأعمال شعبية عام ألف وتسعمائة وأربعة وثمانون .	حرب النجوم كان الأنجح بالألف وتسعمية وأربعة وتمانين.	فلم حرب النجوم كان اكثر الافلام شعبية سنة ألف وتسعمية وأربعة وثمانين.		كان فيلم "حرب الكواكب" من أشهر الأفلام سنة ألف وتسعمائة وأربعة وثمانون.
10830	corpus-6-test-corpus-26-train	MSA	أين قسم غير المدخنين ؟	وين قسم غير المدخنين؟	وين مكان غير المدخنين؟		وين القسم اللي الناس ما بتتدخن فيه؟
10831	corpus-6-test-corpus-26-train	MSA	حرف " ت " " كما في توم ، نعم ها هي لدي هنا ، تارو .	هاد "تي" متل كلمة توم، اه عندي متلها هون، يا تارو.	هاظ "تي" مثل كلمة توم، اه عندي مثلها هون، يا تارو.		الحرف " ت " "زي في توم، ايوة هاي عندي هون، تارو."
10848	corpus-6-test-corpus-26-test	MSA	أظن أنه بديع المنظر .	بتوقع إنه منظر طبيعي حلو كتير.	اظن انه منظر حلو كثير		بظن انه منظره صاير حلو.
10851	corpus-6-test-corpus-26-test	MSA	أريد بعض التفاح ، من فضلك .	بدي شوية تفاح، لو سمحت.	بدي تفاح ، لو سمحت.		بدي شوية تفاح، لو سمحت.
10869	corpus-6-test-corpus-26-train	MSA	ما فائدة هذا ؟	شو فايدته؟	شو فايدته؟		شو فايدة هاد؟
10882	corpus-6-test-corpus-26-train	MSA	أي بطاقات ائتمانية تقبلون ؟	أي نوع من أنواع البطاقات الائتمانية بتتعاملوا فيه؟	شو نوع البطاقة اللي بتقبلوها ؟		شو نوع الفيزا معكم يلي بتقبلوها؟
10922	corpus-6-test-corpus-26-train	MSA	عندي الكثير من الوقت .	معي وقت منيح.	معي وقت مليح.		عندي وايد وقت.
10930	corpus-6-test-corpus-26-train	MSA	حسنا ، إنه وقت الغداء . هل تحب أن نناقشه على الغداء ؟	طيب، هاد وقت الغدا. بتحب اناقشه أكتر بعد الغدا؟	طيب، هسع وقت الغدا. بتحب نحكي أكتر بعد الغدا؟		ماشي، وقت الاكل صار. بتحب نحكي عنها واحنا ناكل؟
10937	corpus-6-test-corpus-26-dev	MSA	لقد سرق مسجل الفيديو من غرفتي .	تسجيل الفيديو إنسرق من غرفتي.	جهاز الفيديو إنسرق من غرفتي.		سرقو مسجل الفيديو من غرفتي.
10950	corpus-6-test-corpus-26-train	MSA	ألو ، اسمي أودا . عندي حجز الليلة ، لكن سوف أتأخر في القدوم . لهذا من فضلك اتركوا لي الحجز .	مرحبا، إسمي عودة. عندي حجز هاي الليلة، بس راح اتأخر شوي على بين ما أنزل الفندق. عشان هيك لو سمحت خليلي التسجيل.	مرحبا، إسمي عودة. عندي حجز هاي الليلة، بس راح اتأخر شوي على بين ما أنزل الفندق. عشان هيك لو سمحت خلولي الحجز.		مرحبا، اسمي أودا. عندي حجز هالليلة، بس راح يتأخر وصولي. يرجـى خليكو الحجز لي.
10953	corpus-6-test-corpus-26-train	MSA	هل هذا الحذاء متين ؟	هاي الكندرة نوعها منيح؟	هاي الكندرة جامدة؟		هاذ البوط قوي؟
10955	corpus-6-test-corpus-26-test	MSA	من فضلك قل له أنني أنتظر مكالمته .	لو سمحت خبره إني بستنى مكالمته.	لو سمحت خبره إني بستنى مكالمته.		من فضلك قللو أني باستنا زنغته.
10964	corpus-6-test-corpus-26-train	MSA	يقولون إن الأنفلونزا منتشرة هناك .	حكوا إنه الإنفلونزا منتشرة هناك.	حكوا إنه الإنفلونزا منتشرة هناك.		بيقولوا انو الإنفلونزا معمية هنيك.
10973	corpus-6-test-corpus-26-train	MSA	لقد جاء لتوه .	اجى قبل شوي.	اجى قبل شوي.		جا هسا.
10975	corpus-6-test-corpus-26-train	MSA	آسف . الحجز كامل لمساء الغد .	أنا آسف، إحنا ما عنا مجال لبكرا بالليل.	أنا آسف، إحنا ما عنا مجال لبكرا المسا.		معذرة. الحجز متكدس لبكرا الليل.
10976	corpus-6-test-corpus-26-train	MSA	أنا مع بعض الأصدقاء .	أنا مع الاصحاب.	أنا مع صحابي.		أنا مع شوية صحاب.
10985	corpus-6-test-corpus-26-train	MSA	حسبما يقول جورو ، فاللسيد يامادا طفلان .	السيد غورو حكى، يامادا عنده طفلين اتنين.	غورو حكى، يامادا عنده طفلين اثنين.		زي ما بقول جورو، السيد يامادا عنده طفلين.
10994	corpus-6-test-corpus-26-dev	MSA	هل يمكن أن تقول ذلك ثانية ؟	ممكن تحكيه مرة تانية؟	ممكن تقوله اللي قلته مرة ثانية؟		ممكن تعيد هاي ثاني؟
10997	corpus-6-test-corpus-26-train	MSA	أريد أن أعرج على برج لندن .	بدي اطلع على برج لندن.	بدي اطلع على برج لندن.		بدي أروح على برج لندن.
11019	corpus-6-test-corpus-26-train	MSA	من فضلكم . اربطوا الأحزمة .	لو سمحتوا حطوا حزام الأمان.	لو سمحتوا حطوا احزمةالأمان.		من فضلكم، إربطوا الأحزمة.
11027	corpus-6-test-corpus-26-test	MSA	كود المنطقة هو ثلاثة . ورقم الهاتف هو اثنان ثلاثة أربعة ثلاثة أربعة صفر صفر .	كود المنطقة تلاتة. رقم التلفون اتنين تلاتة أربعة تلاتة أربعة صفر صفر.	كود المنطقة ثلاثة . رقم التلفون اثنين ثلاثة أربعة ثلاثة أربعة صفر صفر.		رقم المنطقة ثلاثة. ورقم التلفون اثنين ثلاثة أربعة ثلاثة اربعة صفر صفر.
11030	corpus-6-test-corpus-26-test	MSA	عفواً . هل يوجد أي جسر بالقرب من هنا ؟	عفواً، في جسر قريب من هون؟	عفواً، في اي جسر قريب من هون؟		معذرة، فيه جسر قريب من هون؟
11041	corpus-6-test-corpus-26-dev	MSA	معذرة , أريد استخدام غرفة الراحة .	لو سمحت، أنا بدي أستخدم الحمام.	لو سمحت، أنا بدي أستخدم الحمام.		معليش، بدي أروح على الحمام.
11046	corpus-6-test-corpus-26-train	MSA	إنها مشغولة .	مشغولة هلا.	مشغولة هلا.		هيه مشغولة.
11047	corpus-6-test-corpus-26-test	MSA	ملابسه دائماً موضة قديمة .	ملابسه دايماً ما إلها دخل بالموضة.	ملابسه دايماً موضتها قديمة		هدومه دايما موضة قديمة.
11054	corpus-6-test-corpus-26-train	MSA	هل لديكم طعام بحري ؟	عندكم مأكولات بحرية؟	عندكو اكل بحري ؟		عندكم اكل بحري؟
11057	corpus-6-test-corpus-26-train	MSA	هذا مكلف نوعا ما .	هاد كتير غالي.	هاظ غالي شوي		هاي بتكلف شوي.
11058	corpus-6-test-corpus-26-train	MSA	أود ذلك ، لكنني أخشى ألا أستطيع هذه المرة .	أنا حابب أعمله، بس للأسف مش قادر أعمله بهاد الوقت.	انا حاب بس خايف اني مش راح اقدر هاي المرة .		بدي هيك، بس خايف ما أقدر هالمرة.
11064	corpus-6-test-corpus-26-train	MSA	حسنا ، لا أعلم بعد لكنني سوف أحاول بالتأكيد .	طيب، أنا لهلأ ما بعرف، بس أكيد راح أحاول.	طيب، أنا لهسع ما بعرف، بس أكيد راح أحاول.		ماشي، مش عارف لحد الآن بس رح أحاول أكيد.
11069	corpus-6-test-corpus-26-dev	MSA	الملح من فضلك .	ملح، لو سمحت.	ملح، لو سمحت.		الملح لو سمحت.
11082	corpus-6-test-corpus-26-train	MSA	من فضلك استعمل غرفة القياس هناك .	لو سمحت إستخدم غرفة الغيار هناك.	لو سمحت إستخدم غرفة القياس هناك.		من فضلك استخدم غرفة القياس هنيك.
11100	corpus-6-test-corpus-26-train	MSA	تسعون دولاراً لتذكرة الذهاب . نقداً أم بالبطاقة ؟	تسعين دولار لتذكرة الذهاب. كاش وإلا بطاقة؟	تسعين دولار لتذكرة الذهاب. كاش وإلا بطاقة؟		تسعين دولار على تذكرة الروحة. نقدي أو بالكارت؟
11109	corpus-6-test-corpus-26-dev	MSA	هل يمكن أن تخلي المنضدة لي ، من فضلك .	ممكن تنظفلي الطاولة، لو سمحت؟	ممكن تفظيلي الطاولة لو سمحت؟		ممكن تفرغلي الطاولة، لو سمحت.
11123	corpus-6-test-corpus-26-train	MSA	كيف يربي الآباء اليابانيون أولادهم ؟ هل هم صارمون مع أطفالهم ؟	كيف الأهل اليابانيين بربوا أطفالهم؟ بكونوا حازميين مع أطفالهم؟	كيف الأهل اليابانيين بربوا أطفالهم؟ بكونوا حازميين مع أطفالهم؟		كيف بيربو الآباء اليابانيين ولادهم؟ همة شديدين مع عيالهم؟
11126	corpus-6-test-corpus-26-train	MSA	هل يمكن أن تخبرني عن ساعات العمل ؟	ممكن تحكيلي ساعات الشغل؟	ممكن تحكيلي عن ساعات الشغل؟		ممكن تحكيلي عن ساعات الشغل؟
11131	corpus-6-test-corpus-26-dev	MSA	من فضلك لفها كل على حدة .	لو سمحت لف كل وحدة لحال.	لو سمحت لف كل وحدة لحال.		من فضلك غلفها كل وحدة لحالها .
11161	corpus-6-test-corpus-26-train	MSA	معدتي ثقيلة .	حاسس معدتي تقيلة.	حاس معدتي ثقيلة.		معدتي كبيرة.
11171	corpus-6-test-corpus-26-dev	MSA	يبدو هذا جيدا ، أين يمكن أن ننتظرك ؟	مبين منيح. وين ممكن نستناك؟	كويس. وين نستناك؟		بتبدو هاي زينة، وين بنقدر نستناك؟
11174	corpus-6-test-corpus-26-train	MSA	هل يمكن أن نبدأ اللعب عندما ينتهون ؟	ممكن نبدا نلعب بس يخلصوا؟	ممكن نبدا لعب بس يخلصوا؟		بنقدر نبلش نلعب لما يخلصوا؟
11190	corpus-6-test-corpus-26-train	MSA	تعداد سكان اليابان حوالي مائة وعشرينا مليونا .	عدد سكان اليابان حوالي مية وعشرين مليون.	عدد سكان اليابان حوالي مية وعشرين مليون.		عدد الناس اللي في اليابان حوالي مية وعشرين مليون.
11197	corpus-6-test-corpus-26-train	MSA	املأ البنود الآتية في بطاقة التسجيل .	عبيلي هدول الأشياء على بطاقة التسجيل.	عبيلي هاي الأشياء على بطاقة التسجيل.		املي البنود اللي جاية على كرت التسجيل.
11199	corpus-6-test-corpus-26-train	MSA	هل يمكن أن أستعيد متعلقات ؟	بصير اخد اغراضي؟	بصير اخد اغراضي؟		ممكن أرجع متعلقاتي؟
11240	corpus-6-test-corpus-26-train	MSA	هل لديكم أوشحة حريرية ؟ إنني أبحث عن هدية لزوجتي .	عندك شالات حرير؟ عم بدور على هدية لمرتي.	عنكو شالات حرير؟ بدور على هدية لمرتي.		عندكم وشاح حرير؟ أنا بدور على هدية للزوجة.
11246	corpus-6-test-corpus-26-train	MSA	سوف نحضرها الآن . ما هو رقم غرفتك ؟	راح نجيبه هلأ. كم رقم غرفتك؟	راح نجيبه هسع. قديش رقم غرفتك؟		رح نجيبها هلا . شو رقم غرفتك ؟
11264	corpus-6-test-corpus-26-test	MSA	السيد كوباياشي كان يبحث عنك .	السيد كوباياشي كان بدور عليك.	السيد كوباياشي كان بدور عليك.		الاستاذ كوباياشي كان عم يدور عليك.
11267	corpus-6-test-corpus-26-train	MSA	أريد السفر من شنغهاي إلى هاواي بالباخرة .	أنا بدي أسافر من شنغهاي لهاواي بالسفينة.	أنا بدي أسافر من شنغهاي لهاواي بالسفينة.		بدي أروح من شنغهاي لهاواي عالسفينة.
11278	corpus-6-test-corpus-26-test	MSA	هل يمكن أن ترسل أحدا ؟	ممكن تبعتلي حدا؟	ممكن تبعثلي حدا؟		ممكن تبعت حدا؟
11282	corpus-6-test-corpus-26-train	MSA	هل تستطيع تجهيزه بحلول الخامسة من مساء الغد ؟	بتقدر تجهزلي إياه بكرا الساعة خمسة المسا؟	بتقدر تجهزلي إياه بكرا عند الساعة خمسة المسا؟		بتقدر تجهزو عالخمسة بعد بكرة؟
11302	corpus-6-test-corpus-26-train	MSA	إنها تستغرق عشر دقائق سيراً على الأقدام .	بدها عشر دقايق مشي.	بدها عشر دقايق مشي.		بتخد عشر دقايق اذا مشيت على رجليك.
11316	corpus-6-test-corpus-26-train	MSA	قبل أن ننهي العمل ، هلا أعطيتني بضعة دقائق ؟	قبل ما نخلص الشغل، ممكن تعطيني كم دقيقة؟	قبل ما نخلص الشغل، ممكن تعطيني كم دقيقة؟		قبل ما نخلص الشغل، بتقدر تعطيني شوي دقايق؟
11325	corpus-6-test-corpus-26-dev	MSA	أين يمكن أن أوقف سيارتي ؟	وين بقدر أصف سيارتي؟	وين بقدر أصف سيارتي؟		وين ممكن أقف سيارتي؟
11336	corpus-6-test-corpus-26-dev	MSA	اشعر ببرودة وتؤلمني معدتي جداً .	حاسس حالي مقشعر ومعدتي بتوجعني كتير.	حاس بالبرد ومعدتي بتوجعني كثير .		ماسكني برد ومعدتي عم توجعني كتير.
11342	corpus-6-test-corpus-26-train	MSA	ويسكي وماء ، من فضلك . هل لديكم وجبة خفيفة معه ؟	ويسكي ومي، لو سمحت. وعندك أي وجبة خفيفة؟	ويسكي ومي، لو سمحت. وفي عنك وجبة خفيفة؟		ويسكي ومي، لو سمحت. عندكم سندويشة صغيرة او شيء خفيف معه؟
11343	corpus-6-test-corpus-26-train	MSA	كيف يمكنني أن أطفأ الضوء ؟	كيف بقدر أطفي هاد الضو؟	كيف بقدر أطفي الضو؟		شو الطريقة عشان أطفي الدواية؟
11360	corpus-6-test-corpus-26-train	MSA	هل هو مشغول جدا اليوم ؟	هو كتير مشغول اليوم؟	هو كتير مشغول اليوم؟		هو مشغول كثير اليوم؟
11374	corpus-6-test-corpus-26-train	MSA	أريد بعض الخيط .	بدي شوية خيط.	بدي خيط.		بدي شوية خيط.
11375	corpus-6-test-corpus-26-train	MSA	اعطني شهادة طبية , من فضلك .	أعطيني تفويض طبي، لو سمحت.	أعطيني شهادة طبية، لو سمحت.		عطيني وصفة طبية ، لو سمحت .
11378	corpus-6-test-corpus-26-train	MSA	أود تقصيره ببوصة واحدة من هذه المنطقة .	بدي إياك تعملها أقصر بإنش واحد من هون.	بدي اياك تقصر لي اياه انش واحد من هاي المنطقة .		بدي اقصّره بوسطة وحدة من هادي المنطقة.
11392	corpus-6-test-corpus-26-train	MSA	لا أشعر أنني على ما يرام . من فضلك اعطني بعض الدواء .	حاسس حالي مش على بعضي. لو سمحت أعطيني دوا.	حاسس حالي مش على بعضي. لو سمحت أعطيني دوا.		ما بحس حالي منيح. لو سمحت، اعطيني شوي دوا.
11403	corpus-6-test-corpus-26-train	MSA	هل يمكن أن أختر جريدة يابانية , من فضلك ؟	بدي جريدة باللغة اليابانية، لو سمحت؟	بدي جريدة باللغة اليابانية، لو سمحت؟		ممكن اختار جريدة يابانية، لو سمحت؟
11404	corpus-6-test-corpus-26-train	MSA	حسنا . هل يمكن أن أترك السيارة في أي مكان ؟ ما هي رسوم ركن السيارة ؟	تمام. بقدر أصف السيارة بأي مكان؟ وكم تكلفة الصف؟	تمام. بقدر أصف السيارة بأي مكان؟ و وقديش بتكلف الصفة؟		طيب، بقدر اترك السيارة بأي مكان؟ كم الرسوم على ركن السيارة؟
11412	corpus-6-test-corpus-26-train	MSA	أي حافلة تذهب إلى وسط المدينة ؟	أي باص بودي علىوسط البلد؟	أي باص بودي علىوسط البلد؟		أي باص رايح عالدوار الرئيسي؟
11420	corpus-6-test-corpus-26-train	MSA	هل يوجد أي قطار سريع إلى بوسطن ؟	في اي اكسبريس لبوسطن؟	في اي اكسبريس لبوسطن؟		في أي قطار سريع لبوسطن؟
11435	corpus-6-test-corpus-26-train	MSA	من فضلك كن صديقي بالمراسلة .	ممكن تصير صديقي بالمراسلة.	ممكن تصير صديقي بالمراسلة.		من فضلك, كون صاحبي عالتواصل.
11438	corpus-6-test-corpus-26-dev	MSA	سأقيم مع صديق .	انا رخ اسكن مع صاحبي.	انا رخ اسكن مع صاحبي.		رح اسكن مع صاحبي.
11442	corpus-6-test-corpus-26-train	MSA	أنا متأثر للغاية , لا أستطيع البقاء ساكنا .	انا كثير متأثر, مش قادر اضل ساكت.	انا كثير متأثر, مش قادر اضل ساكت.		أنا متأثر كتير, ما قادر أضل ساكت.
11449	corpus-6-test-corpus-26-train	MSA	هل يمكن أن أنزل عند فندق هيلتون ؟	ممكن أنزل عند فندق الهلتون؟	ممكن أنزل عند فندق الهلتون؟		ممكن أنزل عند فندق هيلتون؟
11450	corpus-6-test-corpus-26-train	MSA	أريدك تنزعه .	بدي إياك تشيله.	بدي إياك تشيله.		بديك تشيله.
11457	corpus-6-test-corpus-26-train	MSA	اتجه يساراً في هذا الشارع ثم انعطف عند أول منعطف يمين .	روح يسار لآخر الشارع وبعدين خد أول يمين.	روح يسار لآخر الشارع وبعدين خد أول يمين.		روح يمين بهالشارع وبعدين اتوجه يمين عند اول منعطف.
11462	corpus-6-test-corpus-26-train	MSA	أريد أن أعرف إذا كان يمكن شحن مجموعة الأطباق هذه إلى طوكيو .	بدي أعرف إذا ممكن أشحن طقم الصحون هاد لطوكيو.	بدي أعرف إذا ممكن أشحن طقم الصحون هاظ لطوكيو.		بدي اعرف اذا بينفع اشحن هالطقم صحون لطوكيو.
11467	corpus-6-test-corpus-26-train	MSA	أود بعضاً من القوة الجسدية .	بدي شوي قوة بالجسد.	بدي شوي قوة جسدية.		بدي شوي قوة بالجسم.
11478	corpus-6-test-corpus-26-train	MSA	ألا يوجد طعام متبل وليس حارا جدا ؟	في أي أكل ما يكون كتير حار ومتبل؟	في أكل مبهر ومش حار كثير؟		ما في أكل متبل ومش حار كتير؟
11479	corpus-6-test-corpus-26-train	MSA	هل هو قريب لنصل إليه سيراً .	قريبة كتير لدرجة نروحها مشي؟	هو قريب لدرجة نصله مشي ؟		هو قريب عشان نوصلو مشي؟
11491	corpus-6-test-corpus-26-dev	MSA	أريد بعض الكريم للأيدي .	بدي شوية كريم للإيدين.	بدي شوية كريم للإيدين.		بدي شوية كريم للإيد.
11493	corpus-6-test-corpus-26-train	MSA	هل يمكن أن تمرر لي الملح ؟	بتقدر تمرقلي الملح؟	بتقدر تمرقلي الملح؟		بتقدر تعطيني الملح؟
11500	corpus-6-test-corpus-26-train	MSA	أريد الذهاب إلى وول ستريت . كيف أصل إلى هناك ؟	بدي أروح على الوول ستريت. كيف أوصل لهناك؟	بدي أروح على الوول ستريت. كيف أصل لهناك؟		بدي اروح على وول ستريت. كيف بممكن وصل هنيك؟
11541	corpus-6-test-corpus-26-train	MSA	الكثير جداً من التمارين يضر بك .	التمارين الزايدة عن اللزوم راح تضرك.	التمارين الزايدة عن اللزوم راح تضرك.		كتير كتير من التمرين بيضر فيك.
11544	corpus-6-test-corpus-26-train	MSA	بما في ذلك الإفطار ، والضريبة ، ورسم الخدمة ، سيكون الحساب خمسة أربعون دولارا للشخص الواحد في الليلة .	بتضمن الفطور، الضريبة، وتكلفة الخدمة، راح يكون خمسة وأربعين دولار لكل شخص بكل ليلة.	بشمل الفطور، والضريبة، و بدل الخدمة، راح يكون الحساب خمسه واربعين دولار للشخص بالليلة الوحدة		بتشمل الفطور، الضرايب، ورسم الخدمة، الحساب رح يكون خمسة وأربعين دولار للواحد في الليلة.
11550	corpus-6-test-corpus-26-train	MSA	هل تستطيع تصليح هذا ؟	بتقدر إتصلح هاد؟	بتقدر إتصلح هاظ؟		ممكن تصلح هاي؟
11574	corpus-6-test-corpus-26-train	MSA	مساء الخير . أهلا .	مسا الخير. أهلاً.	مسا الخير. أهلاً.		مسا الخير. أهلين.
11576	corpus-6-test-corpus-26-train	MSA	لا أستطيع العثور على أمتعتك .	مش عم بلاقي شنطك.	مش قادر الاقي شنطك		ما اقدر اعثر على اغراضك.
11595	corpus-6-test-corpus-26-train	MSA	سر مباشرة ، من فضلك .	ضلك ماشي دغري، لو سمحت.	ضلك ماشي دغري، لو سمحت.		روح ع طول، لو سمحت.
11600	corpus-6-test-corpus-26-train	MSA	هل من المأمون شرب الماء الذي هنا ؟	المي هون صالحة للشرب؟	المي هون صالحة للشرب؟		هل آمن نشرب الماء اللي هون؟
11622	corpus-6-test-corpus-26-train	MSA	أهه ، هيا . دولارين فقط .	اه، يلا. دولارين بس.	اه، يلا. دولارين بس.		اها، يلا. بس دولارين.
11626	corpus-6-test-corpus-26-train	MSA	هلا بدلت هذا الفستان بآخر من مقاس أوسع ؟	ممكن لو سمحت تبدل هاد الفستان لواحد أكبر؟	ممكن لو سمحت تبدل هاظ الفستان بواحد أكبر؟		ممكن تبدِّل هالفستان بواحد أكبر حجم؟
11631	corpus-6-test-corpus-26-train	MSA	حسنا ، هيا نذهب . أستطيع مساعدتك في واجبك المنزلي بعد أن نتناول بعض البيتزا .	طيب، يلا نروح. أنا بقدر أساعدك بحل واجبك بعد ما ناكل شوية بيتزا.	طيب، يلا نروح. أنا بقدر أساعدك بحل واجبك بعد ما نوكل بيتزا.		ماشي ، يلا نروح. بقدر اساعدك بواجبك المدرسي بعد ما نكل بيتزا شوي.
11633	corpus-6-test-corpus-26-train	MSA	نعم ، يا سيد تاناكا هناك رسالتان لك .	مزبوط، استاذ تاناكا. في رسالتين إلك.	مزبوط، استاذ تاناكا. في رسالتين إلك.		أيوة، يا سيد تاناكا، في عندك رسالتين.
11643	corpus-6-test-corpus-26-train	MSA	إنه لا يلائمني .	ما بزبط معي.	ما بزبط معي.		مش مناسبني.
11646	corpus-6-test-corpus-26-train	MSA	الغد يوم آخر .	بكرا يوم جديد.	بكرا يوم جديد.		بكرا يوم تاني.
11663	corpus-6-test-corpus-26-train	MSA	ربما أستطيع مساعدتك . هل تحتاج إلى فيتامين سي ؟	ممكن أقدر أساعدك. بدك فيتامين سي؟	ممكن أساعدك. بدك فيتامين سي؟		ممكن اقدر اساعدك . بتحتاج فيتامين سي؟
11689	corpus-6-test-corpus-26-train	MSA	إن محفظتي نشلت في القطار .	محفظتي إنسرقت مني في الباص.	محفظتي إنسرقت مني في الباص.		وحدة سرق محفظتي في القطر.
11704	corpus-6-test-corpus-26-train	MSA	إنه بعيد جداً . يحسن بك أن تأخذ سيارة أجرة .	هاد كتير بعيد. الأحسن تاخد تاكسي.	هاد كتير بعيد. الأحسن تاخد تاكسي.		هو بعيد كتير. فضل أكيد تاخذ تكسي.
11708	corpus-6-test-corpus-26-train	MSA	أريد مقعداً يطل على الممر ، من فضلك .	بدي كرسي بالممر، لو سمحت.	بدي كرسي على الممر ، لو سمحت.		بدي كرسي يطل عالممر، لو سمحت.
11709	corpus-6-test-corpus-26-train	MSA	أعيش في شقة إيجارها ثمانون ألف ين في الشهر .	أنا عايش بشقة اجارها تمانين ألف ين بالشهر.	أنا عايش بشقة اجارها تمانين ألف ين بالشهر.		بعيش بشقة، الإجارتها ثمانين ألف ين بالشهر.
11714	corpus-6-test-corpus-26-train	MSA	هل لي أن أقاطعكم ؟	ممكن أقاطعك؟	ممكن أقاطعك؟		ممكن أقاطعكم؟
11720	corpus-6-test-corpus-26-dev	MSA	أعرض علىّ مقاساً أكبر .	ورجيني واحد أعرض.	ورجيني قياس ثاني.		عرض عليي مقاس أكبر.
11734	corpus-6-test-corpus-26-train	MSA	معذرة . هل تمانع في أن تبادل المقاعد معي ؟	عفواً، ممكن تبدل الكراسي معي؟	عفواً، ممكن تبدل الكراسي معي؟		معلش، بتمانع تبدل معي مكانك؟
11746	corpus-6-test-corpus-26-train	MSA	نعم ، بالطبع .	اه، أكيد.	اه، أكيد.		أيوا، أكيد.
11751	corpus-6-test-corpus-26-train	MSA	اذهب إلى الناحية وانعطف يساراً عند إشارة المرور .	روح تحت لعند التقاطع ولف شمال من عند الإشارة.	روح تحت لعند الزاوية ولف شمال من عند الإشارة.		روح على السوية ولف شمال عند الاشارة.
11754	corpus-6-test-corpus-26-dev	MSA	هل تفضل ماسكات للشعر أصغر أم أكبر ؟	بتحب ماسكات الشعر الصغيرة وإالا الكبيرة؟	بتحب ماسكات الشعر الصغيرة والا الكبيرة؟		بتحبي القناع للشعر أصغر ولا أكبر؟
11767	corpus-6-test-corpus-26-test	MSA	أريد غرفة مفردة بحمام لقاء ثمانين دولارا ، من فضلك .	بدي غرفة مفردة مع حمام بتمانين دولار، لو سمحت.	بدي غرفة مفردة مع حمام بثمانين دولار، لو سمحت.		بدي غرفة فردية مع حمام بـثمانين دولار, لو سمحت.
11800	corpus-6-test-corpus-26-train	MSA	أريد إيداع مقتنياتي الثمينة في خزينة الفندق .	بدي اأمن على اشيائي الغالية بخزنة الفندق.	بدي احط على اشيائي الغالية بخزنة الفندق.		بدي أودي أغراضي الغالية في صندوق الفندق.
11817	corpus-6-test-corpus-26-dev	MSA	هل لديكم غرفة متاحة الليلة ؟	عندك غرفة متوفرة الليلة؟	عندكو غرفة فاضية الليلة؟		عندكم غرفة فاضية الليلة ؟
11821	corpus-6-test-corpus-26-train	MSA	نعم ، ولكن تأكد أن تذكرتك معك .	اه، بس اتأكد إنه التذكرة موجودة معك.	اه، بس اتأكد إنه التذكرة موجودة معك.		ايوه، بس تأكد إنه تذكرتك معك.
11862	corpus-6-test-corpus-26-train	MSA	لن ينضم للجولة الاختيارية إلا القليل من الناس .	بس ناس محدودين اللي راح يشتركوا بالجولة الإختيارية.	بس ناس قليلين اللي راح يشتركوا بالجولة الإختيارية.		ما رح ينضم للجولة الاختيارية غير شوي من الناس.
11872	corpus-6-test-corpus-26-train	MSA	لا تهتم . على أي حال ، خذني من فضلك إلى مركز الحي الصيني . سأحاول أن أجده بنفسي .	ولا يهمك. على العموم، لو سمحت خدني على مركز تشيناتون. وراح أحاول أكتشفه لحالي.	ولا يهمك. على العموم، لو سمحت خدني على مركز الحي الصيني. وراح أحاول الاقيه لحالي.		ما تشيل هم. يلا، خذني لو سمحت لمركز الحي الصيني. راح احاول ادور الجهة وحدي.
11879	corpus-6-test-corpus-26-train	MSA	تشغل أشخاصاً جدد في أبريل .	الناس الجداد بستأجروا بنيسان.	تشغل ناس جداد بشهر اربعه .		رح توظف ناس جداد في نيسان.
11880	corpus-6-test-corpus-26-train	MSA	أرجو ذلك .	بتمنى.	بتمنى.		بتمنى هيك.
11885	corpus-6-test-corpus-26-train	MSA	اثنان ويسكي مع الماء , من فضلك .	اتنين ويسكي مع مي، لو سمحت.	اتنين ويسكي مع المي، لو سمحت.		تنين ويسكي مع مية, لو سمحت.
11901	corpus-6-test-corpus-26-train	MSA	من الذي يعزف ؟	مين يلي بعزف؟	مين يلي بعزف؟		مين اللي عم يعزف؟
11913	corpus-6-test-corpus-26-dev	MSA	هل يمكن أن تتصلوا بي إن عثرتم على حقيبتي ؟	ممكن تتصل في إذا لقيت شنطتي؟	ممكن تتصلوا بيه إذا لقيتوا شنطتي؟		ممكن تحكوا معي لو لقيتوا شنطتي؟
11916	corpus-6-test-corpus-26-train	MSA	إلى اليسار ، من فضلك .	على الشمال، لو سمحت.	على الشمال، لو سمحت.		على اليسار، لو سمحت.
11932	corpus-6-test-corpus-26-test	MSA	هلا وقفت معي لالتقاط صورة ؟	ممكن توقف معي عشان نتصور؟	ممكن تتصور معي ؟		بتقدر توقف معي شوي عشان نصور صورة؟
11938	corpus-6-test-corpus-26-dev	MSA	لا . هل تحب الإبلاغ عنه ؟	لأ. بتحب تبلغ عنه؟	لأ. بتحب تبلغ عنه؟		لا . بدك تبلغ عنو ؟
11949	corpus-6-test-corpus-26-train	MSA	هذه السن في المقدمة تؤلمني .	هاد السن اللي قدام بوجعني.	هاظ السن اللي قدام بوجعني.		هالسنة في الامام بتوجعني.
11959	corpus-6-test-corpus-26-train	MSA	ما هي أحدث ألعاب الكمبيوتر لفتى سنه خمسة عشر عاما ؟	شو آخر لعبة كمبيوتر نزلت لعمر خمسطعشر سنة؟	شو آخر لعبة كمبيوتر نزلت لولد عمره خمسطعشر سنة؟		شو أحدث ألعاب الكمبيوتر لولد عمرو خمسة عشر سنة؟
11972	corpus-6-test-corpus-26-train	MSA	سنراك في الغد .	بنشوفك بكرا.	بنشوفك بكرا.		رح نشوفك بكرة.
11973	corpus-6-test-corpus-26-test	MSA	هل يوجد مطعم أرخص قريب من هنا ؟	في مطعم أرخص قريب من هون؟	في مطعم أرخص قريب من هون؟		في مطعم رخيص قريب من هون؟
11975	corpus-6-test-corpus-26-train	MSA	لا ، ولكن شكراً لك . إنني أشعر بتحسن .	لأ. بس شكراً إلك. حاسس حالي أحسن.	لأ. بس شكراً إلك. حاسس حالي أحسن.		لا، بس شكرًا هونيك. أنا حاسس انو صرت أحسن.
11976	corpus-6-test-corpus-26-train	MSA	هل لديكم أي خبز ؟	عندكم خبز؟	عندكم خبز؟		عندكم خبز؟
11977	corpus-6-test-corpus-26-train	MSA	ما هو مستوى مهارتك في عزف الكمان ؟	كيف وضعك مع الكمان؟	كيف وضعك مع الكمان؟		شو مستواك بعزف الكمان؟
11990	corpus-6-test-corpus-26-train	MSA	لقد انزلقت قدما صديقي وسقط في الحمام .	صاحبي تزحلق ووقع بالحمام.	صاحبي تزحلق ووقع بالحمام.		قدما صاحبي انزلقوا ووقع بالحمام.
11991	corpus-6-test-corpus-26-train	MSA	أريد مطفأة سجائر .	بدي مكتة؟	بدي مكتة؟		بدي منطفة سجاير.
11997	corpus-6-test-corpus-26-train	MSA	حظرت المسيحية وأغلقت البلاد بالنسبة لبقية العالم .	منعت المسيحية وسكروا المدينة لنهاية العالم.	منعت المسيحية وسكروا البلاد عن باقي العالم .		مسكرت المسيحية وسكرت البلاد عن باقي الدنيا.
12005	corpus-6-test-corpus-26-train	MSA	ما الكمية التي تريدها ؟	قديش بدك؟	قديش بدك؟		شو الكمية اللي بدك ياها؟
12012	corpus-6-test-corpus-26-train	MSA	خلطة جمبري لها ، وكذلك لي .	مشكل جمبري إلها ونفس الشي إلي.	مشكل جمبري إلها ونفس الشي إلي.		خليطة جمبري لهي وكمان لي.
12033	corpus-6-test-corpus-26-train	MSA	هلاّ جعلت توقيعك هنا والحروف الأولى من اسمك هنا .	مكن توقعلي هون و الاحرف الاولى من اسمك هون.	مكن توقعلي هون و الاحرف الاولى من اسمك هون.		هات خلي توقيعك هون وأول حروف اسمك هون.
12035	corpus-6-test-corpus-26-train	MSA	لقد أثلج صدري زيارة مقاركم الرئيسية وكذا ما جرى بيننا من مناقشات مهمة . شكراً جزيلاً على ما أبديتموه من تعاون .	كتير تشرفت بزيارتي لمكاتبك الرئيسية ونقاشاتي المهمة معك. شكراً إلك كتير على معاملتك اللطيفة.	تشرفت كثير بزيارتي مكاتبكو الرئيسية ونقاشاتي المهمة معكم . شكراً الكو كتير على تعاونكو .		فرحت كتير لما زرت مكاتبكم الرئيسية وكمان النقاشات الهمة اللي صارت بيناتنا. كتير شكراً على العون اللي قدمتوه.
12054	corpus-6-test-corpus-26-train	MSA	إن غطيطك مزعج .	شخيرك مزعج.	شخيرك مزعج.		غطيطك معصبني.
12056	corpus-6-test-corpus-26-train	MSA	إن لونها لا يروقني على الإطلاق . هلي يمكنني إرجاعها ؟	لونها مش عاجبني بالمره. ممكن أرجعها؟	لونها مش عاجبني بالمره. ممكن أرجعها؟		لونها مش عاجبني ابداً. ممكن أرجعها؟
12057	corpus-6-test-corpus-26-dev	MSA	اخرج من ذلك الباب ، وانتظر عند المحطة رقم ستة .	ضلك طالع من الباب اللي هناك، واستنى عند الموقف رقم ستة.	ضلك طالع من الباب اللي هناك، واستنى عند الموقف رقم ستة.		طلع من هاي الباب، و انطر عند المحطة رقم ستة.
12060	corpus-6-test-corpus-26-dev	MSA	دجاج محمر ، من فضلك .	جاج مشوي، لو سمحت.	جاج محمر ، لو سمحت.		دجاج مشوي، لو سمحت.
12069	corpus-6-test-corpus-26-train	MSA	هل لي في بعض الفلفل ؟	ممكن فلفل؟	ممكن فلفل؟		ممكن أخذ شوي فلفل؟
12074	corpus-6-test-corpus-26-test	MSA	أجل أريد شيئاً أقرؤه .	اه، حابب اقرأ إشي.	اه، حابب اقرأ إشي.		أيوا بدي إشي أقراه.
12101	corpus-6-test-corpus-26-train	MSA	أنا السيد تكاهاشي بالغرفة رقم خمسة تسعة وأربعين . من فضلك أرسل أربع زجاجات من بيرة بودفايزر .	معك أستاذ تاكاهاشي من الغرفة رقم خمسة تسعة وأربعين. ممكن تبعتلي أربع قناني من بيرة بودويسر، لو سمحت؟	معك أستاذ تاكاهاشي من الغرفة رقم خمسة تسعة وأربعين. ممكن تبعتلي أربع قناني من بيرة بودويسر، لو سمحت؟		أنا الأستاذ تكاهاشي بالأوضة رقم ٥٩ . لو سمحت بدي أربع بطولين من البيرة بودفايزر.
12131	corpus-6-test-corpus-26-train	MSA	هذه سبعون دولار .	هي سبعين دولار.	هاي سبعين دولار.		هاي سبعين دولار.
12140	corpus-6-test-corpus-26-train	MSA	من فضلك اتصل بي في الفندق عندما تجد حقائبي .	لو سمحت إتصل في على الفندق بس تلاقي شنطي.	لو سمحت إتصل في على الفندق بس تلاقي شنطي.		من فضلك، كلمني بالفندق لما تلاقي شنطي.
12150	corpus-6-test-corpus-26-train	MSA	أريد مكالمة لإيقاظي في الثامنة والنصف صباح غد ، من فضلك .	بدي ترن تصحيني بكرا الساعة تمنية ونص الصبح، لو سمحت.	بدي ترن تصحيني بكرا الساعة ثمانية ونص الصبح، لو سمحت.		بدي مكالمة تصحيني الثامنة ونص بالصبح بكرة ، بدي المعروف يا رجاء .
12167	corpus-6-test-corpus-26-train	MSA	أجل ، ولكن هذا كثير جدا ، ولقد شبعت بالفعل .	مزبوط، بس هاد كتير وأنا أصلاً شبعان.	مزبوط، بس هاد كتير، وأنا شبعت ..		أيوة، بس هاي كتير كثير ، وأنا صرت أكلت كفاية.
12172	corpus-6-test-corpus-26-train	MSA	أريد غسيلاً للفم .	بدي غسول للفم.	بدي غسول للفم.		بدي أغسل حلقي.
12173	corpus-6-test-corpus-26-train	MSA	أشعر بوعكة .	حاسس حالي مش على بعضي.	حاسس حالي مش على بعضي.		أنا حاسس حالي مريض.
12182	corpus-6-test-corpus-26-train	MSA	هل تقدمون تخفيضات كبيرة ؟	بتعمل خصومات كبيرة؟	بتعملو خصومات كبيرة؟		بتسووا تنزيلات كبار؟
12193	corpus-6-test-corpus-26-train	MSA	طوكيو صفر ثلاثة أربعة مرات تسعة أربعة خمسة ستة سبعة .	طوكيو صفر تلاتة أربع تسعات أربعة خمسة ستة سبعة.	طوكيو صفر ثلاثة أربع تسعات أربعة خمسة ستة سبعة.		طوكيو صفر تلاتة أربعة مرات تسعة أربعة خمسة ستة سبعة.
12240	corpus-6-test-corpus-26-train	MSA	فضلا ، ساعدني في العثور على حديقة الحيوان .	لو سمحت, ممكن تدلني على حديقة الحيوانات؟	لو سمحت, ممكن تدلني على حديقة الحيوانات؟		من فضلك، ساعدني اعثر على حديقة الحيوانات.
12246	corpus-6-test-corpus-26-train	MSA	هلا أخبرتني كيفية تعديلها من فضلك ؟	ممكن تحكيلي كيف اعدله؟	ممكن تحكيلي كيف اعدلها لو سمحت؟		ممكن تحكيلي كيف اعدلها لو سمحت؟
12247	corpus-6-test-corpus-26-train	MSA	متى بالتقريب ستنتهي جولة الحافلة ؟	متى تقريبا بتخلص جولة الباص؟	متى تقريبا بتخلص جولة الباص؟		إمتى تقريبا رح تخلص دورة الباص؟
12254	corpus-6-test-corpus-26-train	MSA	أرني كيفية استعمال الهاتف .	ورجيني كيف استخدم التلفون.	ورجيني كيف استخدم التلفون.		وَرِّني كيف بدي استخدم التلفون.
12259	corpus-6-test-corpus-26-train	MSA	بالتأكيد . لدينا بعض الماركات الأمريكية الأصلية الجميلة . للكتب .	أكيد. عنا علامات كتب حلوة أمريكية أصلية.	عنا ماركات امريكية اصلية حلوة . للكتب		أكيد. عنا شوية ماركات أمريكية أصلية حلوة. للكتب.
12298	corpus-6-test-corpus-26-train	MSA	أريد عامل تشغيل يتحدث اليابانية من فضلك .	موظف مكالمات بحكي ياباني، لو سمحت.	موظف مكالمات بحكي ياباني، لو سمحت.بدي عامل تشغيل بحكي ياباني لو سمحت .		بدي شغيل بيحكي ياباني لو سمحت.
12331	corpus-6-test-corpus-26-train	MSA	نحن مهتمون بالأزياء .	إحنا منهتم بالموضة.	إحنا منهتم بالموضة.		احنا بنهتم بالأزياء.
12333	corpus-6-test-corpus-26-train	MSA	هل يمكنك أن تجر سيارتي ؟	ممكن تجرللي سيارتي؟	ممكن تجرللي سيارتي؟		ممكن تجرب سيارتي؟
12345	corpus-6-test-corpus-26-train	MSA	أهذه عيادة إف ؟	هاي عيادة اف؟	هاي عيادة اف؟		هاي عيادة إف؟
12364	corpus-6-test-corpus-26-train	MSA	مرحبا يا سيدة ياماجوتشي ؟ فريقك على الخط . قبلت دعوتك . استمر من فضلك .	مرحبا، مدام ياماغوشي؟ الطرف التاني على الخط. مكالمتك زابطة. تفضلي، لو سمحتي.	مرحبا، مدام ياماغوشي؟ الطرف التاني على الخط. مكالمتك زابطة. تفضلي، لو سمحتي. مرحبا مدام ياما جوتشي؟ فريقك على الخط . قبلت دعوتك. كمل لو سمحت .		أهلا وسهلا يا سيدة ياماجوتشي، فريقك عم يكلمك. رديت على دعوتك. استمري، من فضلك.
12391	corpus-6-test-corpus-26-test	MSA	من أين يسعني شراء تذكرة توصيل بالكوبون ؟	من وين بقدر أشتري كوبون تذكرة الصعود؟	من وين بقدر أشتري تذكرة توصيل بالكوبون ؟		من وين بقدر اشتري تذكرة توصيل بالكوبون؟
12396	corpus-6-test-corpus-26-train	MSA	متى نصل إلى لوس أنجلوس ؟	على أي ساعة راح نوصل على لوس أنجيلوس؟	متى بنصل لوس أنجيلوس؟		إمتى بنوصل على لوس أنجلوس؟
12403	corpus-6-test-corpus-26-train	MSA	سر في نفس الاتجاه حوالي خمس دقائق ثم لف لجهة اليسار .	ضلك ماشي دغري حوالي خمس دقايق، وروح يسار.	ضلك ماشي دغري حوالي خمس دقايق، وروح يسار.		امشي بنفس الاتجاه حوالي خمس دقايق و بعدين ارجع على الشمال.
12416	corpus-6-test-corpus-26-train	MSA	إنه في هذا الطريق في اتجاه الشاطئ .	هاد الطريق بودي للبحر.	هو بهاي الطريق جهة الشط .		هوي ع هالشارع طالع على البحر.
12420	corpus-6-test-corpus-26-train	MSA	هذا الشاي العشبي يساعد الجسم على استعادة نشاطه .	شاي الأعشاب هاد بساعدك تستعيد نشاطك.	شاي الأعشاب هاظ بساعدك تستعيد نشاطك.		هاي الشاي العشبي بتساعد الجسم يرجع نشاطه.
12421	corpus-6-test-corpus-26-train	MSA	لم تصنع هذه باليابان ، أليس كذلك ؟	هدول مش صناعة يابانية، صح؟	هاي مش صناعة يابانية، صح؟		ما صنعت هاي باليابان، صح؟
12443	corpus-6-test-corpus-26-train	MSA	حسناً . خذ هذا الاتجاه . من فضلك ، سأوصلك إلى غرفتك .	تمام. من هاد الطريق لو سمحت. راح أورجيك غرفتك.	تمام. من هاظ الاتجاه لو سمحت. راح اوصلك غرفتك.		ماشي، خذ هاي الطريقة. لو سمحت، رح أوصلك لغرفتك.
12479	corpus-6-test-corpus-26-train	MSA	علىّ مغادرة الفندق قبل الظهر .	أنا لازم أطلع من الفندق قبل الظهر.	أنا لازم اترك الفندق قبل الظهر.		لازم اطلع من الفندق قبل الضهر.
12495	corpus-6-test-corpus-26-train	MSA	نريد اثنين هامبورجر واثنين قهوة ، من فضلك ، نريد تناولها خارج المحل .	اتنين همبرجر واتنين قهوة، لو سمحت. بدي أخدهم معي.	اثنين همبرجر واثنين قهوة، لو سمحت. بدي أخدهم معي.		بدنا زوج همبرجر وزوج قهوة، لو سمحت، بدنا ناكلها برة المحل.
12510	corpus-6-test-corpus-26-train	MSA	هل يسعني أن استمر في حمل هاتين الحقيبتين ؟	بقدر اضل شايلة هدول الشنتيتين؟	بقدر اضل شايلة هدول الشنتيتين؟		بتسمحلي آكمل حامل هالشنتتين؟
12527	corpus-6-test-corpus-26-train	MSA	لقد طلبت لحما لا سمكا . هل يمكنك تغيير هذا ؟	طلبت لحمة، مش سمك. ممكن تغيرلي هاد؟	طلبت لحمة، مش سمك. ممكن تغيرلي هاظ؟		طلبت لحم مش سمك. ممكن تغير هاي؟
12546	corpus-6-test-corpus-26-train	MSA	إن طفلي قد أصابه الإعياء الشديد .	هاد الولد تعبان على الأخير.	ابني تعبان كثير .		طفلي صار مرهق كثير.
12551	corpus-6-test-corpus-26-train	MSA	أشعر بالغثيان .	أنا مريض من معدتي.	أنا مريض من معدتي.		بحس حالي بدي أتقيء.
12556	corpus-6-test-corpus-26-train	MSA	هذا الجاكت ليس مقاسي .	هاد الجاكيت مش مقاسي.	هاد الجاكيت مش مقاسي.		هاي الجاكيت مش مقاسي.
12557	corpus-6-test-corpus-26-train	MSA	أريد لقاء السيد ويليم .	أنا بدي أقابل الأستاذ ويليم.	أنا بدي أقابل الأستاذ ويليم.		بدي أشوف الأستاذ ويليم.
12560	corpus-6-test-corpus-26-train	MSA	إن بها تشكيلة من سبعة فيتامينات ومعادن .	فيو مجموعة من سبع فيتامينات ومعادن.	فيها تشكيلة من سبع فيتامينات ومعادن.		فيها مزيج من سبع فيتامينات ومعادن.
12562	corpus-6-test-corpus-26-test	MSA	إن " السنة " متقلقلة .	السن بتخلخل.	السن بتخلخل.		ال"سنة" عم تتقلب.
12589	corpus-6-test-corpus-26-train	MSA	هل سأسترد ما أنفقت عند عودتي إلى اليابان ؟	بقدر أعمل إسترجاع بس أرجع على اليابان؟	بقدر اخذ اللي صرفته بس أرجع على اليابان؟		رح أرجع اللي صرفته لما أرجع على اليابان؟
12599	corpus-6-test-corpus-26-train	MSA	ما هي مكونات هذا الطبق ؟	شو مكونات هاد الصحن؟	شو مكونات هاظ الصحن؟		شو مكونات هالصحن؟
12603	corpus-6-test-corpus-26-train	MSA	في أي الدول صنعت هذه .	بأي مدينة هاد مصنوع؟	بأي دولة هاظ مصنوع؟		بأي بلد سووا هاي؟
12608	corpus-6-test-corpus-26-train	MSA	أيمكنك الانتهاء من ذلك بعد عشر دقائق ؟	بتقدر تعمله خلال عشر دقايق؟	بتقدر تنهيه بعد عشر دقايق؟		بتقدر تخلص هاي بعد عشر دقايق؟
12611	corpus-6-test-corpus-26-dev	MSA	لا أجيد الإنجليزية . هل ثمة من يتحدث اليابانية هنا ؟	أنا مش كتير بالإنجليزي. في حد هون بحكي ياباني؟	أنا مش كتير بالإنجليزي. في حد هون بحكي ياباني؟		أنا مش بعرف أحكي إنجليزي. في حدا بحكي ياباني هون؟
12615	corpus-6-test-corpus-26-train	MSA	من اين يمكنني الحصول على مسكوكة لركوب المترو ؟	من وين أجيب رمز القطار؟	من وين أجيب رمز القطار؟ من وين بقدر اجيب فراطة عشان اركب المترو ؟		من وين ممكن أجيب تذكرة لأركب المترو؟
12638	corpus-6-test-corpus-26-train	MSA	سنبعث لك بالبريد عشرين عينة إضافية .	عشرين عينة إضافية راح نبعتلك إياها بالبريد.	راح نوديلك بالبريد عشرين عينة اضافية .		رح نبعتلك عالبريد عشرين عينة زيادة.
12644	corpus-6-test-corpus-26-train	MSA	لا أعتقد أن ذلك يناسبني فجلدي جاف إلى حد ما .	ما أظن إنه هاد إلي لأنه بشرتي جافة نوعاً ما.	ما أظن إنه هاد إلي لأنه بشرتي جافة نوعاً ما. ما أظن انه هاظ بناسبني لانه بشرتي جافة شوي .		ما بعتقد انه هاد بلبقلي، جلدي ناشف كثير.
12650	corpus-6-test-corpus-26-train	MSA	أيمكنني الحصول على جدول زمني ، من فضلك ؟	ممكن آخد جدول المواعيد، لو سمحت؟	ممكن آخد جدول زمني، لو سمحت؟		ممكن أحصل على جدول الوقت، لو سمحت؟
12658	corpus-6-test-corpus-26-dev	MSA	أجل ، أظن أني سوف أنظر .	اه، أظن راح أستنى.	اه، أظن راح اشوف.		ايوا، بظن إني رح اطلع.
12671	corpus-6-test-corpus-26-train	MSA	تسعة وتسعون دولاراً في الساعة للطفل ؟	تسعة وتسعين دولار بالساعة لكل طفل.	تسعة وتسعين دولار بالساعة للطفل ؟		تسعة وتسعين دولار بالساعة للطفل ؟
12672	corpus-6-test-corpus-26-train	MSA	آسف لقد نفذ هذا الصنف لدينا .	آسف، بعناهم كلهم.	آسف، بعناهم كلهم. آسف هذا الصنف خلص من عنا .		معذرة، هاد النوع خلص عنا.
12677	corpus-6-test-corpus-26-train	MSA	لابد أن تكون هادئة .	لازم يكون هادي.	لازم تكون هادية .		لازم تكوني هادية.
12678	corpus-6-test-corpus-26-dev	MSA	لدي معداتي الخاصة .	عندي عدتي الخاصة.	عندي عدتي الخاصة.		عندي أدواتي الخاصة.
12679	corpus-6-test-corpus-26-train	MSA	أريد مفتاح الغرفة خمسة صفر ثلاثة ، من فضلك .	بدي مفتاح الغرفة، خمسة صفر تلاتة، لو سمحت.	بدي مفتاح الغرفة، خمسة صفر ثلاثة ، لو سمحت.		بدي مفتاح الغرفة خمسة صفر تلاتة، لو سمحت.
12699	corpus-6-test-corpus-26-test	MSA	متى يجري عرض فيلم " رجل المحطة الأخيرة " ؟	بأي وقت عرض ترمينال مان؟	بأي وقت عرض ترمينال مان؟ متى بينعرض فلم " رجل المحطة االخيرة" ؟		إمتى بتيجي عرض فيلم "رجل المحطة الأخيرة"؟
12701	corpus-6-test-corpus-26-train	MSA	أين الحلاق ؟	وين الحلاق؟	وين الحلاق؟		وين الحلاق؟
12708	corpus-6-test-corpus-26-train	MSA	في الساعة السابعة ، من فضلك .	الساعة سبعة، لو سمحت.	الساعة سبعة، لو سمحت.		بالساعة السابعة ، لو سمحت.
12712	corpus-6-test-corpus-26-train	MSA	لقد أتلفت حقيبتي .	شنتة السفر خربت.	خربت شنتتي .		دمرت شنتتي.
12713	corpus-6-test-corpus-26-train	MSA	لمشاهدة المعالم .	سياحة.	سياحة.		لتشوف المناظر.
12732	corpus-6-test-corpus-26-train	MSA	إني من إسبانيا .	أنا من اسبانيا.	أنا من اسبانيا.		أنا من إسبانيا.
12750	corpus-6-test-corpus-26-dev	MSA	إن ثمة خطأ ما في بطاقة المفتاح هذه ، أعطني غيره ، من فضلك .	في إشي غلط ببطاقة المفتاح. ممكن تعطيني وحدة تانية، لو سمحت؟	في إشي غلط ببطاقة المفتاح هاي . اعطيني غيرها، لو سمحت .		فيها غلطة شكلها بالكارت هاي، عطني وحدة ثانية، الله يخليك.
12755	corpus-6-test-corpus-26-dev	MSA	هناك طفح على ذراعي .	عندي طفح حبوب على إيدي.	عندي طفح على إيدي.		في طفح على إدي.
12761	corpus-6-test-corpus-26-train	MSA	أرجو أن تبعث هذا بالبريد الجوي إلى اليابان .	ابعت هاد بالبريد الجوي لليابان، لو سمحت.	ابعت هاظ بالبريد الجوي لليابان، لو سمحت.		بتمنى تبعت هاد بالبريد الجوي لليابان.
12766	corpus-6-test-corpus-26-test	MSA	أين أقرب صيدلية ؟	وين أقرب صيدلية؟	وين أقرب صيدلية؟		وين أقرب صيدلية؟
12770	corpus-6-test-corpus-26-dev	MSA	مزيد من النبيذ ، من فضلك .	كاس خمر تاني، لو سمحت.	كمان نبيذ ، لو سمحت.		زيادة من العنبية، لو سمحت.
12773	corpus-6-test-corpus-26-train	MSA	إن الناس ودودون جداً .	الناس كتير لطيفيين.	الناس كتير لطيفيين.		الناس حابيين كثير.
12776	corpus-6-test-corpus-26-test	MSA	كم عدد المشروبات التي يغطيها السعر ؟	كم شراب بتضمن السعر؟	كم شراب بتضمن السعر؟ قديش عدد المشروبات اللي مغطية بالسعر ؟		قديش الأشربة اللي السعر بيغطيها؟
12777	corpus-6-test-corpus-26-test	MSA	لقد تمكنت من تحقيق ذلك .	إنت اعملتها.	إنت اعملتها. انا قدرت اعملها		قدرت أوصل لهذا الشي.
12782	corpus-6-test-corpus-26-train	MSA	أين بوابة ركوب الطائرة بالنسبة لهذه الرحلة ؟	وين بوابة الصعود لرحلة الطيران هاي؟	وين بوابة الطيارة لهاي الرحلة ؟		وين باب صعود الطيارة لهاي الرحلة؟
12790	corpus-6-test-corpus-26-test	MSA	في حالة إمكان ذلك , احجز منضدة بالقرب من النافذة من فضلك .	اذا صار مجال، ممكن تحجزلي طاولة عند الشباك؟	اذا صار مجال، احجزلي طاولة قريبة من الشباك لو سمحت .		لو في امكانية, احجزلي طاولة عند الشباك لو سمحت.
12805	corpus-6-test-corpus-26-dev	MSA	هل أعلن بالفعل عن وجوب الصعود إلى الطائرة ؟	خلص اعلن عن امر الصعود للطيارة؟	خلص اعلن عن امر الصعود للطيارة؟ اعلنوا عن جد عن انه لازم نطلع بالطيارة ؟		هل فعلا اعلنوا انه لازم نصعد على الطيارة؟
12810	corpus-6-test-corpus-26-train	MSA	إننا على ارتفاع اثني عشر ألف قدم .	إحنا على إرتفاع طنعشر ألف قدم.	إحنا على إرتفاع اثنعشر ألف قدم.		احنا على ارتفاع اتناشر ألف قدم.
12820	corpus-6-test-corpus-26-train	MSA	في البداية نود مشاهدة وول ستريت .	أول إشي، حابيين نشوف الوول ستريت.	أول إشي، حابيين نشوف الوول ستريت.		بالأول، بدنا نتفرج على وول ستريت.
12822	corpus-6-test-corpus-26-train	MSA	أين محطة الحافلة التي تقصد أكسفورد ؟	وين موقف الباص يلي بودي لأوكسفورد؟	وين موقف الباص يلي بودي لأوكسفورد؟		وين محطة الباص اللي بتروح على أكسفورد؟
12823	corpus-6-test-corpus-26-train	MSA	سأنتظر حتى يتاح الجلوس في التراس .	راح أضل أستنى لعند ما يفضى الترس.	راح أضل أستنى حتى اقعد في الترس.		رح أستنا لحتى يصير الجلوس بالتراس ممكن.
12835	corpus-6-test-corpus-26-train	MSA	هل يمكننا أن نلقي نظرة على حافظات جلدية ؟	ممكن نشوف محافظ جلد؟	ممكن نشوف محافظ جلد؟		ممكن نتطلع على محافظ جلد؟
12861	corpus-6-test-corpus-26-dev	MSA	دعنا نشاهد التلفزيون . فيها مباراة بيسبول .	تعال نتفرج على التلفزيون. في عليه مباراة بيسبول.	تعال نتفرج على التلفزيون. فيه مباراة بيسبول.		خلينا نتفرج على التلفزيون. في مباراة بيسبول.
12878	corpus-6-test-corpus-26-train	MSA	هل يمكنك كتابة عنوانك في هذا المكان ؟	ممكن تكتب العنوان تبعك هون؟	ممكن تكتب العنوان تبعك هون؟		تقدر تكتب عنوانك هون؟
12884	corpus-6-test-corpus-26-train	MSA	أخبرني من فضلك أين أقرب صيدلية .	لو سمحت إحكيلي وين أقرب صيدلية موجودة.	لو سمحت إحكيلي وين أقرب صيدلية موجودة.		قولي لي بتكرم أين أقرب صيدلية.
12903	corpus-6-test-corpus-26-train	MSA	إلى فندقي ، من فضلك ، إن عنوان فندقي في هذه الورقة .	لفندقي، لو سمحت. عنوان فندقي بكتوب علورقه هاي.	لفندقي، لو سمحت. عنوان فندقي على الورقة هاي .		للفندق تبعي، لو سمحت، العنوان تبع الفندق ع هالورقة.
12905	corpus-6-test-corpus-26-dev	MSA	كم مقاطعة هناك بالإضافة إلى طوكيو ؟	كم عدد المحافظات اللي جنب طوكيو؟	كم عدد المقاطعات غير طوكيو؟		أديش محافظات في غير طوكيو؟
12917	corpus-6-test-corpus-26-train	MSA	ابقى على الخط وانتظر لحظة من فضلك .	ضلك عالخط واستنى شوي لو سمحت.	ضلك عالخط واستنى شوي لو سمحت.		خليك على الخط و استنى شوي من فضلك.
12936	corpus-6-test-corpus-26-train	MSA	ماذا تعمل في المعتاد بالمنزل بعد تناول العشاء ؟	شو بتعمل عادة بالبيت بعد العشا؟	شو بتعمل عادة بالبيت بعد العشا؟		شو بتعمل بالعادة بالبيت بعد ما تتعشى؟	منزل	بيت	معتاد	عادة
12941	corpus-6-test-corpus-26-train	MSA	بالتأكيد . متى تود أن تلعب جولف ؟	أكيد. متى بتحب تلعب جولف؟	أكيد. متى بتحب تلعب جولف؟		طبعاً. أميت بدك تلعب جولف؟	متى	أميت	بالتأكيد	طبعاً
12945	corpus-6-test-corpus-26-train	MSA	ستكون بالبيت في حوالي الثلاثة .	راح تكون بالبيت حوالي الساعة تلاتة.	راح تكون بالبيت حوالي الساعة تلاتة.		رح تكون بالدار حوالي الثلاثة.	بيت	دار
12952	corpus-6-test-corpus-26-train	MSA	أريد أن اتصل هاتفياً بالسفارة اليابانية .	بدي أتصل بالسفارة اليابانية.	بدي أتصل بالسفارة اليابانية.		بدي أحكي بالتلفون مع السفارة اليابانية.
12968	corpus-6-test-corpus-26-train	MSA	زدني قليلاً .	كمان شوي.	كمان شوي.		زيدني شوي.	زد	زيد
12969	corpus-6-test-corpus-26-train	MSA	من أين تغادر الحافلات لمشاهدة المعالم ؟	من أي مكان بتطلع باصات المعالم السياحية؟	من أي مكان بتطلع باصات المعالم السياحية؟		من وين بتطلع الباصات حتى نشوف المناظر؟	تغادر	بتطلع	حافلات	باصات
12973	corpus-6-test-corpus-26-train	MSA	كم تتقاضى ثمنا لإرسالها لليابان ؟	قديش بتدفع عشان تبعتهم على اليابان؟	قديش بتدفع عشان تبعتهم على اليابان؟		قديش بدك توخذ عشان تبعثها على اليابان؟	تتقاضى	توخذ	ترسلها	تبعثها
12976	corpus-6-test-corpus-26-dev	MSA	ليس لدي أية مضارب أو أحذية .	ما عندي ولا أي مضارب أو بوت.	ما عندي ولا أي مضارب أو بوت.		ما عندي لا مظارب ولا أحذية.	ليس	ما	مضارب	مظارب
13015	corpus-6-test-corpus-26-train	MSA	هل تقبل بالين الياباني ؟	بنفع ين ياباني؟	بنفع ين ياباني؟		بتوخذ بالين ياباني؟	تقبل	توخذ
13022	corpus-6-test-corpus-26-train	MSA	هل لديك سيارة من طراز ستانج ؟	عندك موستانج؟	عندك موستانج؟		عندك سيارة من نوع ستانج؟	طراز	نوع
13027	corpus-6-test-corpus-26-train	MSA	هل سنقفز من هنا ؟	راح إننط من هون؟	راح إننط من هون؟		رح إنط من هون؟	نقفز	إنط
13069	corpus-6-test-corpus-26-train	MSA	يا سيد كاواي لدينا مائدة لك الآن . تفضل من هنا .	أستاذ كاواي، في عنا هلأ طاولة إلك. تعال من هون، لو سمحت.	أستاذ كاواي، في عنا هلأ طاولة إلك. تعال من هون، لو سمحت.		يا أستاذ كاواي، عنا طاولة الك حاليا. تعال من هون.	مائدة	طاولة	الآن	حاليا
13072	corpus-6-test-corpus-26-train	MSA	بالتأكيد ، انزل من على الدرج هناك وسوف تجد بعض الإرشادات فاتبعها من فضلك .	أكيد. إنزل الدرج هناك وراح تشوف شوية اتجاهات. بس إمشي عليهم.	أكيد. إنزل الدرج هناك وراح تشوف شوية اتجاهات. بس إمشي عليهم.		أكيد، إنزل من الدرج هناك وراح تلاقي تعليمات، اتبعهن لو سمحت.	تجد	تلاقي	إرشادات	تعليمات
13075	corpus-6-test-corpus-26-dev	MSA	المكتب الأمامي . هل يمكنني أن أساعدك ؟	المكتب يلي قدام. ممكن أساعدك؟	المكتب يلي قدام. ممكن أساعدك؟		أول مكتب من قدام . شلون بقدر أخدمك؟	أساعدك	أخدمك	كيف	شلون
13076	corpus-6-test-corpus-26-train	MSA	هلا أنزلتني عند فندق هلتون من فضلك ؟	ممكن تنزلني عند فندق الهلتون، لو سمحت؟	ممكن تنزلني عند فندق الهلتون، لو سمحت؟		ممكن تنزلني عند فندق الهيلتون لو سمحت؟	أنزلتني	تنزلني
13077	corpus-6-test-corpus-26-dev	MSA	هل يتحتم عليك كثيراً أن تعمل حتى ساعة متأخرة ؟	دايما بكون عليك تشتغل بالليل؟	دايما بكون عليك تشتغل بالليل؟		بتظطر كثير تشتغل لوقت متأخر؟	يتحتم	تظطر	تعمل	تشتغل
13090	corpus-6-test-corpus-26-dev	MSA	آسف جداً , ليس لدينا المزيد . ماذا عن الصحف الإنجليزية ؟	آسف كتير، بس ما عنا كمان. شو رأيك بالجرايد الإنجليزي؟	آسف كتير، بس ما عنا كمان. شو رأيك بالجرايد الإنجليزي؟		آسف كثير, ما عنا زيادة. شو رايك بالجرايد الإنجليزية؟	رأيك	رايك	المزيد	زيادة
13095	corpus-6-test-corpus-26-train	MSA	مائة غير المدخنين من فضلك .	طاولة لغير-المدخنين. لو سمحت.	طاولة لغير-المدخنين. لو سمحت.		مية غير اللي بدخنوا، لو سمحت.	مائة	مية
13096	corpus-6-test-corpus-26-train	MSA	هلا أخبرتني قبل أن نصل إلى درهام ؟	ممكن تخبرني قبل ما نصل لدورهام؟	ممكن تخبرني قبل ما نصل لدورهام؟		بصير تخبرني قبل ما نوصل لـ درهام؟	نصل	نوصل	هلا	بصير
13113	corpus-6-test-corpus-26-test	MSA	هل هو طازج إلى هذا الحد ؟	هاد طازة؟	هاد طازة؟		هو طازا لهالدرجة	طازج	طازا	إلى هذا الحد	لهالدرجة
13116	corpus-6-test-corpus-26-train	MSA	ليس هذا صحيحاً . أنت دائما تعاملني .	هاد مش صح. إنت دايما بتعالجني.	هاد مش صح. إنت دايما بتعالجني.		هاظ مش صحيح . إنت دايما بتعاملني.	هذا	هاظ	دائما	دايما
13118	corpus-6-test-corpus-26-dev	MSA	هلا أريتني بعض الفساتين ؟	ممكن تفرجيني شوية فساتين؟	ممكن تفرجيني شوية فساتين؟		ممكن توريني شوي من الفساطين؟	فساتين	فساطين	أريتني	توريني
13126	corpus-6-test-corpus-26-train	MSA	تهجى الكلمة من فضلك ؟	إلفظه، لو سمحت.	إلفظه، لو سمحت.		هجي الكلمة لو سمحت؟	تهجى	هجي
13133	corpus-6-test-corpus-26-train	MSA	بدأت الخمر تثملني .	أنا بديت أسكر من الخمر.	أنا بديت أسكر من الخمر.		بلش العرق يسكرني.	بدأ	بلش	تثملني	يسكرني
13134	corpus-6-test-corpus-26-train	MSA	احترس لأن الجو في الجبال شديد التقلب .	دير بالك لأنه الجو بتغير عند الجبال.	دير بالك لأنه الجو بتغير عند الجبال.		انتبه لأنه جو الجبال بيتغير بسرعة.	احترس	انتبه	تقلب	تغير
13159	corpus-6-test-corpus-26-train	MSA	هل يمكن استخدام شيكات سياحية وعملة ين ياباني ؟	بقدر استخدم شيك سياحي وين ياباني؟	بقدر استخدم شيك سياحي وين ياباني؟		بصير تستعمل شيكات سياحية وعملة ين ياباني؟	يمكن	بصير
13162	corpus-6-test-corpus-26-train	MSA	آسف ، لقد تحققت من إدارة الخدمة وإدارة المفقودات ولم أجدها عندهم .	آسف، أنا تأكدت من الاتنين إدارة الغرف و مكتب المفقودات. مش موجود عندهم.	آسف، أنا تأكدت من الاتنين إدارة الغرف و مكتب المفقودات. مش موجود عندهم.		بعتذر، تأكدت من إدارة الخدمة وإدارة المقودات وما لقيتها عندهم.	تحققت	تأكدت	أجدها	لقيتها
13172	corpus-6-test-corpus-26-train	MSA	يصعب العثور على هذا المكان . إنه في طريق ضيق يتفرع من الطريق الرئيسي .	هاد مكان صعب عشان تلاقيه. موجود بشارع صغير تابع للشارع الرئيسي السريع.	هاد مكان صعب عشان تلاقيه. موجود بشارع صغير تابع للشارع الرئيسي السريع.		صعب يلتقى هالمكان. هو بدخلة بتتفرع من الشارع الرئيسي.	عثور	يلتقى
13183	corpus-6-test-corpus-26-train	MSA	لا أعرف شيئاً عن هذا الأمر .	أنا ما بعرف ولا إشي عنه.	أنا ما بعرف ولا إشي عنه.		ما بعرف إشي عن هالشغلة.	أمر	شغلة	شيء	إشي
13184	corpus-6-test-corpus-26-train	MSA	يمكن أن نتحدث حول هذا الموضوع في مقهى .	منقدر نحكي عنه بكوفي شوب.	منقدر نحكي عنه بكوفي شوب.		ممكن نحكي عن هالموضوع بالكافيه.	نتحدث	نحكي
13188	corpus-6-test-corpus-26-train	MSA	فهمت ، في هذه الحالة ليس علىّ أن أدفع أجر التبديلات ، أليس كذلك ؟	فهمت عليك، بهاد الحال أنا ما راح أدفع حق التعديلات، صح؟	فهمت عليك، بهاد الحال أنا ما راح أدفع حق التعديلات، صح؟		فهمت، بهاي الحالة ما عليي أدفع فلوس التبديلات، مش هيك؟	أليس	مش	ليس	ما
13202	corpus-6-test-corpus-26-train	MSA	اعطني عامل التليفون من فضلك .	موظف المكالمات، لو سمحت.	موظف المكالمات، لو سمحت.		إعطيني عامل التلفون لو سمحت .	اعطني	إعطيني
13262	corpus-6-test-corpus-26-train	MSA	هل يمكن أن تنزل السرج ، من فضلك ؟	ممكن تنزلي السرج، لو سمحت؟	ممكن تنزلي السرج، لو سمحت؟		ممكن تنزل السرج، لو سمحت؟
13264	corpus-6-test-corpus-26-dev	MSA	هل يمكن أن أبيت عندكم الليلة ؟	بصير انام عندكم الليلة؟	بصير انام عندكم الليلة؟		بقدر أبات عندكو الليلة؟	أبيت	أبات
13267	corpus-6-test-corpus-26-train	MSA	حسناً . سوف أخذ اثنين فقط . شكراً .	طيب. راح آخد تنتين بس. شكراً إلك.	طيب. راح آخد تنتين بس. شكراً إلك.		ماشي، رح أوخذ بس ثنين. شكراً.	حسناً	ماشي
13268	corpus-6-test-corpus-26-train	MSA	هاهي فاتورتك . الحساب ثلاثة تسعة وسبعين دولار .	هي فاتورتك. بتطلع تلاتمية و سبعة وتسعين دولار.	هي فاتورتك. بتطلع تلاتمية و سبعة وتسعين دولار.		هاي فاتورتك. الحساب ثلاثة تسعة وسبعين دولر.	ها	هاي
13269	corpus-6-test-corpus-26-train	MSA	أنت محظوظ .	إنت محظوظ.	إنت محظوظ.		إنت محظوظ.	أنت	إنت
13287	corpus-6-test-corpus-26-train	MSA	من فضلك اختر لي مائدة ذات منظر ليلي لطيف .	لو سمحت اخترلي طاولة مع إطلالة مسائية حلوة.	لو سمحت اخترلي طاولة مع إطلالة مسائية حلوة.		من فظلك إختارلي طاولة مع منظر حلو بالليل.	اختر	إختار
13290	corpus-6-test-corpus-26-train	MSA	هل هذا مصنوع آليا أم يدويا ؟	هاد شغل- آلة وإالا شغل- يدوي؟	هاد شغل- آلة وإالا شغل- يدوي؟		هاذ صناعة آلية ولا يدوية؟	أم	ولا
13291	corpus-6-test-corpus-26-train	MSA	أود تأجير هذا الطراز من السيارات لمدة أربعة وعشرين ساعة .	بدي استأجر سيارة من هاد النوع لمدة أربعة وعشرين ساعة.	بدي استأجر سيارة من هاد النوع لمدة أربعة وعشرين ساعة.		بدي أستأجر هاذ الموديل من السيارات لمدة أربع وعشرين ساعة.
13306	corpus-6-test-corpus-26-train	MSA	كم كان لطيفاً أن التقي بك .	كتير انبسطت بمعرفتك.	كتير انبسطت بمعرفتك.		كثير كان حلو إني اجتمع فيك.	بك	فيك	كم	كثير
13322	corpus-6-test-corpus-26-train	MSA	إنه ممزق .	هاد ممزوع.	هاد ممزوع.		هو إمزع.	ممزق	إمزع
13333	corpus-6-test-corpus-26-dev	MSA	حسناً ، فلنق نظرة عليك .	طيب هلأ، خليني ألقي نظرة عليك.	طيب هلأ، خليني ألقي نظرة عليك.		طيب ، خلينا نطل عليك .	حسناً	طيب	نلقي نظرة	نطل
13347	corpus-6-test-corpus-26-train	MSA	حسنا ، تصور كيف ستطول فترة عمله لو سأل سؤالاً آخر لكل شخص . هيا بنا ، لنسرع ونحضر حقائبنا . علينا الذهاب إلى الجمارك للإعلان عن أغراضنا بعد ذلك .	طيب، بس إنت فكر كم المدة اللي راح يكول فيها شغله لو سأل سؤال إضافي لكل واحد. يلا تعال، خلينا نسرع وناخد شنطتا. لازم نروح بعدها على تصريح الجمارك.	طيب، بس إنت فكر كم المدة اللي راح يكول فيها شغله لو سأل سؤال إضافي لكل واحد. يلا تعال، خلينا نسرع وناخد شنطتا. لازم نروح بعدها على تصريح الجمارك.		طيب، تخيل كم رح يطول وقت شغله لو سأل كل واحد سؤال ثاني. يلا نروح، خلينا نسرع ونجيب شناتينا. لازم نروح على الجمارك عشان نعلن عن اغراضنا بعد هيك.	هيا	يلا	آخر	ثاني
13396	corpus-6-test-corpus-26-train	MSA	ما هو الوزن ؟	شو وزنه؟	شو وزنه؟		شو الوزن؟	ما	شو
13399	corpus-6-test-corpus-26-train	MSA	هل يوجد بالقرب من هنا مطعم صيني ؟	في مطعم صيني قريب من هون؟	في مطعم صيني قريب من هون؟		في مطعم صيني قريب من هون؟	هنا	هون
13407	corpus-6-test-corpus-26-train	MSA	إن الرصيف رقم خمسة يقع هناك .	رصيف رقم خمسة هناك.	رصيف رقم خمسة هناك.		الرصيف رقم خمسة موجود هناك.	يقع	موجود
13408	corpus-6-test-corpus-26-train	MSA	متى تقام مباراة كرة القدم ؟	متى راح تبدا مباراة كرة القدم؟	متى راح تبدا مباراة كرة القدم؟		متى بتبلش مباراة كرة القدم؟	تقام	بتبلش
13423	corpus-6-test-corpus-26-dev	MSA	إنها معطلة . هل تستطع فحص آلة التصوير هذه ؟	خربانة. ممكن تشيكلي على الكاميرا؟	خربانة. ممكن تشيكلي على الكاميرا؟		هاي معطلة. بتقدر تشيّك على آلة التصوير هاي؟	تستطيع	بتقدر	تفحص	تشيك
13424	corpus-6-test-corpus-26-test	MSA	قهوة مع القشدة والسكر ، من فضلك .	قهوة بالكريمة والسكر، لو سمحت.	قهوة بالكريمة والسكر، لو سمحت.		قهوة مع القشطة والسكر، لو سمحت.	قشدة	قشطة
13436	corpus-6-test-corpus-26-train	MSA	أعتقد أن هناك أخطاءً في الفاتورة .	بتوقع إنه في أغلاط بالفاتورة.	بتوقع إنه في أغلاط بالفاتورة.		بظن انه في أغلاط بالفاتورة.	أخطاء	أغلاط	أعتقد	بظن
13438	corpus-6-test-corpus-26-train	MSA	من فضلك اعطني هذه .	لو سمحت أعطيني هاد.	لو سمحت أعطيني هاد.		لو سمحت اعطيني هاي.	هذه	هاي
13440	corpus-6-test-corpus-26-train	MSA	إنها البوابة السابعة .	بوابة رقم سبعة.	بوابة رقم سبعة.		هاي البوابة السابعة.	إنها	هاي
13444	corpus-6-test-corpus-26-train	MSA	هل أنت اسكتلندي ؟	إنت سكوتلاندي؟	إنت سكوتلاندي؟		إنت سكتلندي ؟
13446	corpus-6-test-corpus-26-train	MSA	ثلاثة اثنان واحد اثنان . انتظر ثانية ، حسنا ؟ أريد أن أرسل لك شيئاً هنا . معذرة .	تلاتة-اتنين-واحد-تنين. استنى ثانية، تمام؟ أنا بدي أبعتلك إشي هون. لو سمحت.	تلاتة-اتنين-واحد-تنين. استنى ثانية، تمام؟ أنا بدي أبعتلك إشي هون. لو سمحت.		ثلاثه اثنين واحد اثنين. استناني شوي , طيب؟ بدي أبعثلك اشي هون. اعذرني.	انتظرني	استناني
13471	corpus-6-test-corpus-26-test	MSA	مائة وخمسة وثلاثون ين للدولار الواحد .	مية وتلاتة وخمسين ين لكل دولار.	مية وتلاتة وخمسين ين لكل دولار.		مية وخمسة وثلثين ين للدولار الواحد.	ثلاثون	ثلثين
13476	corpus-6-test-corpus-26-train	MSA	إن الجونلات القصيرة ومعها الأحذية الطويلة لن تنقضي موضتها .	التنانير القصيرة مع الجزم ولا عمرها بتبطل موضة.	التنانير القصيرة مع الجزم ولا عمرها بتبطل موضة.		مش ممكن تخلص موضة التنانير القصيرة مع الجزم الطويلة.	تنقضي	تخلص	جونلات	تنانير
13477	corpus-6-test-corpus-26-train	MSA	هل أستطيع التحدث مع المدير ؟	ممكن أحكي مع المدير؟	ممكن أحكي مع المدير؟		بقدر أحكي مع المدير؟	أتحدث	أحكي
13480	corpus-6-test-corpus-26-train	MSA	لماذا يختلف السعر عن الموجود في العداد ؟	ليش الاجارمختلف عن العداد؟	ليش الاجارمختلف عن العداد؟		ليش السعر غير عن اللي عالعداد؟	يختلف	غير
13484	corpus-6-test-corpus-26-train	MSA	هل يمكن أن أرى هذا ؟	ممكن أشوف هاد؟	ممكن أشوف هاد؟		ممكن أشوف هاظا؟	أرى	أشوف
13487	corpus-6-test-corpus-26-train	MSA	لعد تعهدت لنفسي بأنني سوف أتعرف عليك عندما أراك .	وعدت حالي إني بس أشوفك، راح أتعرف عليك.	وعدت حالي إني بس أشوفك، راح أتعرف عليك.		وعدت حالي انه رح أعرفك لما بشوفك.	تعهدت	وعدت	نفسي	حالي
13488	corpus-6-test-corpus-26-train	MSA	ما الذي كان يحدث منذ الفترة الأخيرة ؟	شو اللي عم بصير بآخر فترة؟	شو اللي عم بصير بآخر فترة؟		شو اللي كان صاير من زمان؟	يحدث	صاير
13492	corpus-6-test-corpus-26-train	MSA	لا أشعر بحالة جيدة . هل ترشدني إلى طبيب ؟	أنا مش حاسس حالي منيح. ممكن تنصحني بدكتور؟	أنا مش حاسس حالي منيح. ممكن تنصحني بدكتور؟		ما بحس حالي ملبح. ممكن ادلني على دكتور؟	أشعر	بحس	ترشدني	ادلني
13504	corpus-6-test-corpus-26-train	MSA	حفلتك مقامة الآن . تفضل .	الحفهل مبلشة هلا. إتفضل.	الحفهل مبلشة هلا. إتفضل.		حفلتك مبلشة هسا. تفظل.	مقامة	مبلشة
13515	corpus-6-test-corpus-26-train	MSA	هل هناك عرض ترفيهي ليلي ؟	في عرض ترفيهي بالليل؟	في عرض ترفيهي بالليل؟		في عرض ترفيهي بالليل؟
13528	corpus-6-test-corpus-26-dev	MSA	سيفون الحمام لا يعمل .	المرحاض مش عم بسحب المي.	المرحاض مش عم بسحب المي.		سيفون الحمام مش شغال.	لا	مش
13532	corpus-6-test-corpus-26-dev	MSA	كم من الوقت نحتاج للذهاب مشياً من هنا إلى مبنى البلدية ؟	كم بدها وقت من هون لهول سيتي مشي؟	كم بدها وقت من هون لهول سيتي مشي؟		قديش بدنا وقت عشان نمشي من هون لبناية البلدية؟	مبنى	بناية
13547	corpus-6-test-corpus-26-train	MSA	خذ هذا الدواء بعد كل وجبة عندما يزداد الألم .	خد هاد الدوا بعد كل وجبة لما يزيد الوجع.	خد هاد الدوا بعد كل وجبة لما يزيد الوجع.		أخذ هاظا الدوا بعد كل وجبة لما يزيد الوجع.	ألم	وجع	يزداد	يزيد
13550	corpus-6-test-corpus-26-train	MSA	لقد وضعت المال في مظروف خاص مزين يسمى شوجيبوكورو .	حطيت المصاري بظرف مزين زينة خاصة إسمه شوجيبوكورو.	حطيت المصاري بظرف مزين زينة خاصة إسمه شوجيبوكورو.		حطيت المصاري بظرف خاص مزركش اسمه شوجيبوكورو.	مزين	مزركش	مظروف	ظرف
13553	corpus-6-test-corpus-26-train	MSA	لقد أصيب شخص .	في واحد إنجرح.	في واحد إنجرح.		انصاب عنا واحد.	شخص	واحد	أصيب	انصاب
13609	corpus-6-test-corpus-26-test	MSA	أتساءل عما يمكنني أن أحصل عليه منه ؟	بفكر شو ممكن اخد منه؟	بفكر شو ممكن اخد منه؟		بفكر شو بقدر استلم منو؟	اتساءل	بفكر
13624	corpus-6-test-corpus-26-train	MSA	هل لديك خريطة لمترو الأنفاق ؟	عندك خريطة للقطار؟	عندك خريطة للقطار؟		عندك خريطة للمترو؟	لديك	عندك
13629	corpus-6-test-corpus-26-train	MSA	لدي غرفة جاهزة لك في جراند هويتل . هل تستطيع الذهاب إلى هناك ؟	أنا عندي غرفة جاهزة إلك بفندق جراند. بتقدر تروح هناك؟	أنا عندي غرفة جاهزة إلك بفندق جراند. بتقدر تروح هناك؟		عندي غرفة جاهزة إلك بالجراند هوتيل. بتقدر تروح لهناك؟	لك	إلك	تذهب	تروح
13635	corpus-6-test-corpus-26-train	MSA	عندي ألم في عيني اليمنى .	عندي وجع بعيني اليمين.	عندي وجع بعيني اليمين.		عندي وجع بعيني اليمين.	يمنى	يمين
13657	corpus-6-test-corpus-26-train	MSA	لا أحسن الألمانية كثيراً .	أنا مش كتير شاطر بالألماني.	أنا مش كتير شاطر بالألماني.		ما بعرف ألماني كثير.
13660	corpus-6-test-corpus-26-train	MSA	لابد أن نجتمع ثانية بالتأكيد .	إحنا أكيد لازم نلتقي مع بعض مرة تانية.	إحنا أكيد لازم نلتقي مع بعض مرة تانية.		لازم نجتمع مرة ثانية أكيد.	لابد	لازم
13666	corpus-6-test-corpus-26-train	MSA	هلا أخذت هذه السراويل ؟	بصير تاخد هاي البناطليل؟	بصير تاخد هاي البناطليل؟		ممكن توخذ هاي البنطلونات؟	سراويل	بنطلونات	بالتأكيد	أكيد
13682	corpus-6-test-corpus-26-train	MSA	هل يمكنني استعارة مضرب وكرات ؟	ممكن أستعير مضرب تنس وكورة؟	ممكن أستعير مضرب تنس وكورة؟		ممكن أستعير مضرب وطابات؟	كرات	طابات
13685	corpus-6-test-corpus-26-test	MSA	هل يمكن أن تدخل معه فكة صغيرة ؟	ممكن تحط شوية فراطة؟	ممكن تحط شوية فراطة؟		بتقدر ادخل معه شوية فراطة؟	فكة	فراطة
13694	corpus-6-test-corpus-26-train	MSA	هل يمكن أن أخذ نصف إبريق ؟	ممكن آخد نص قنينة؟	ممكن آخد نص قنينة؟		ممكن أوخذ نص بريق؟	نصف	نص	إبريق	بريق
13707	corpus-6-test-corpus-26-train	MSA	تحية . أنا جون .	مرحبا. أنا جان.	مرحبا. أنا جان.		مرحبا. أني جون.
13717	corpus-6-test-corpus-26-train	MSA	ناكاي .	ناكاي.	ناكاي.		ناكاي .
13719	corpus-6-test-corpus-26-train	MSA	هل تمانع إذا التقطت صورة لك ولسيارتك الأجرة ؟	بتمانع إذا أخدت صورة إلك وللتاكسي تبعك؟	بتمانع إذا أخدت صورة إلك وللتاكسي تبعك؟		بتمانع لو أخذت صورة إلك وللتكسي تبعتك؟	التقطت	أخذت
13733	corpus-6-test-corpus-26-train	MSA	لقد اتصلت منذ ثلاثة أيام بخصوص حقيبة ضائعة .	أنا إتصلت عشان شنطة ضايعة قبل تلت أيام.	أنا إتصلت عشان شنطة ضايعة قبل تلت أيام.		اتصلت من ثلاث أيام عشان شنتة ظايعة.	ضائعة	ظايعة	حقيبة	شنتة
13748	corpus-6-test-corpus-26-test	MSA	أريد فندقاً ارخص .	بدي قندق أرخص.	بدي قندق أرخص.		بدي فندق أرخص.	أريد	بدي
13755	corpus-6-test-corpus-26-dev	MSA	أوه ، هناك الكثير مما يجب أن تراه في قرية جرينتش .	أووه، في كتير أشياء لازم تشوفها بقرية جرين وتش.	أووه، في كتير أشياء لازم تشوفها بقرية جرين وتش.		اووه، فيه شغلات كثير لازم تشوفها في قرية جرينتش.	هناك	فيه	يجب	لازم
13769	corpus-6-test-corpus-26-train	MSA	في عمل . لدي صلات عمل هناك .	بشغل. عندي علاقات تجارية هناك.	بشغل. عندي علاقات تجارية هناك.		في شغل. عندي واسطات شغل هناك.	صلات	واسطات	عمل	شغل
13783	corpus-6-test-corpus-26-train	MSA	إنه يلائم بزتك .	بتلبق مع بدلتك.	بتلبق مع بدلتك.		بناسب سترتك .	يلائم	بناسب	بزتك	سترتك
13784	corpus-6-test-corpus-26-train	MSA	هلا راقبت حقيبتي من فضلك ؟	ممكن لو سمحت تخلي عينك على شنطتي؟	ممكن لو سمحت تخلي عينك على شنطتي؟		ممكن تراقبلي شنتي ، لو سمحت؟
13788	corpus-6-test-corpus-26-train	MSA	كيف تحب هذه الفكرة ؟ نحن نقبل بشرطك الذي ينص على فترة بلاغ مسبق قدرها ستة اشهر شريطة أن تمنحنا الحق بالبيع لمدة ستة أشهر بعد إنهاء العقد .	لأي درجة حبيت هاي الفكرة؟ إحنا وافقنا على شرطك تبع الست أشهر، مع ملاحظة إنه تعطينا الحق إنه نبيع لمدة ست شهور من بعد ما يخلص العقد.	لأي درجة حبيت هاي الفكرة؟ إحنا وافقنا على شرطك تبع الست أشهر، مع ملاحظة إنه تعطينا الحق إنه نبيع لمدة ست شهور من بعد ما يخلص العقد.		شو رأيك بهالفكرة؟ احنا قبلنا بشرطك اللي كاتب فيه عن فترة انذار مسبقة قد ما تكون ستة أشهر، بس بس يكون عنا الحق نبيع لمدة ستة أشهر بعد ما نخلص العقد.
13803	corpus-6-test-corpus-26-train	MSA	معذرة . هل تعرف نيويورك جيدا ؟	لو سمحت. بتعرف نيويورك كويس؟	لو سمحت. بتعرف نيويورك كويس؟		معلش . بتعرف نيويورك مليح ؟	معذرة	معلش
13824	corpus-6-test-corpus-26-test	MSA	سوف ننتظر . من فضلك اتصل بنا عندما تكون مستعداً .	راح نستنا. لو سمحت خبرنا بس تكون جاهز.	راح نستنا. لو سمحت خبرنا بس تكون جاهز.		رح نستنى . لو سمحت, إتصل فينا لما تكون جاهز.	مستعد	جاهز	عندما	لما
13827	corpus-6-test-corpus-26-train	MSA	أود زيارة جراح .	بدي أشوف دكتور جراحة.	بدي أشوف دكتور جراحة.		بدي اروح عند دكتور جراحة.	أود	بدي
13828	corpus-6-test-corpus-26-dev	MSA	هل هذه مكونات طبيعية ؟	هدول مكونات طبيعية؟	هدول مكونات طبيعية؟		هاي مكونات طبيعية؟
13831	corpus-6-test-corpus-26-train	MSA	أريد أن أركب في سيارة رياضية .	حابب أسوق سيارة رياضية.	حابب أسوق سيارة رياضية.		بدي أطلع بسيارة سبايدر.
13843	corpus-6-test-corpus-26-train	MSA	كود المنطقة هو صفر ثلاثة . والرقم هو ثلاثة واحد اثنان ثلاثة أربعة خمسة ستة سبعة .	مفتاح المنطقة صفر تلاتة. الرقم تلاتة واحد اتنين تلاتة أربعة خمسة ستة سبعة.	مفتاح المنطقة صفر تلاتة. الرقم تلاتة واحد اتنين تلاتة أربعة خمسة ستة سبعة.		رمز المنطقة هو صفر تلاتة. والرقم هو تلاتة واحد اتنين تلاتة أربعة خمسة ستة سبعة.
13854	corpus-6-test-corpus-26-train	MSA	لقد أصيب ببرد .	عنده زكام.	عنده زكام.		صار عنده رشح.	برد	رشح	أصيب	صار
13856	corpus-6-test-corpus-26-test	MSA	أفضل شيء هو اسطوانة مصغرة .	سوبكومباكت راح يكون أحسن إشي.	سوبكومباكت راح يكون أحسن إشي.		أحسن اشي هو سي دي صغير.	مصغر	صغير	أفضل	أحسن
13862	corpus-6-test-corpus-26-train	MSA	أريد أن أرسل ذلك بطريقة التوصيل العام .	بدي أبعت هاد على التوصيل العام.	بدي أبعت هاد على التوصيل العام.		بدي أبعث هاي عن طريق التوصيل العام.	أرسل	أبعث
13903	corpus-6-test-corpus-26-train	MSA	دعني أحول هذه المكالمة إلى المسئول .	خليني أحول هاي المكالمة للرجال المسؤول.	خليني أحول هاي المكالمة للرجال المسؤول.		خليني أحوّل هاي المكالمة للمسؤول.	دعني	خليني
13913	corpus-6-test-corpus-26-train	MSA	أي مقاس تريد ؟	أي مقاس بدك؟	أي مقاس بدك؟		شو السايز اللي بدك ياه؟
13919	corpus-6-test-corpus-26-train	MSA	أوه يا عزيزي . لم أدرك أنني لازلت لدي هذه الأشياء .	أووه، حبيبي. أنا ما كنت أتصور إنه هدول لسا عندي.	أووه، حبيبي. أنا ما كنت أتصور إنه هدول لسا عندي.		يا حبيبي، ما كنت أدري إنه بعده عندي هاي الأشياء.	أدرك	أدري	عزيزي	حبيبي
13920	corpus-6-test-corpus-26-train	MSA	هل ليدكم صناديق لإرسال الطرود ؟	عندك مجموعة صناديق لبعت الطرود؟	عندك مجموعة صناديق لبعت الطرود؟		عندكم علب لارسال الطرود ؟	صناديق	علب
13921	corpus-6-test-corpus-26-train	MSA	هل ستدفع شركة الطيران رسوم الفندق والوجبات ؟	راح تدفع شركة الطيران رسوم الفندق والوجبات؟	راح تدفع شركة الطيران رسوم الفندق والوجبات؟		رح تدفع شركة الطيران رسوم الفندق والوجبات؟	س	رح
13938	corpus-6-test-corpus-26-train	MSA	هل هذه كلها هي حقائبك ؟	كل هدول شنطك؟	كل هدول شنطك؟		هاي كلها شناتيك؟	هذه	هاي
13942	corpus-6-test-corpus-26-train	MSA	كيف ترغب في إجراء المكالمة ؟	كيف بدك تعمل المكالمة؟	كيف بدك تعمل المكالمة؟		شلون بدك تعمل المكالمة؟	كيف	شلون	إجراء	عمل
13946	corpus-6-test-corpus-26-train	MSA	حسنا ، إنه باهظ الثمن . إنه لم يصنع في اليابان ، أليس كذلك ؟	طيب، هاد غالي. هاد صناعة يابانية، صح؟	طيب، هاد غالي. هاد صناعة يابانية، صح؟		تمام ، هو غالي .اكيد مش صنع اليابان، مش؟	حسنا	تمام	باهظ	غالي
13953	corpus-6-test-corpus-26-train	MSA	هلا مررت لي الملح ، من فضلك ؟	ممكن لو سمحت تمرقلي الملح؟	ممكن لو سمحت تمرقلي الملح؟		ممكن تقربلي الملح، لو سمحت؟	مررت	تقرب
13966	corpus-6-test-corpus-26-train	MSA	أين أقرب مطعم لهذا الفندق ؟	وين أقرب مطعم على هاد الفندق؟	وين أقرب مطعم على هاد الفندق؟		وين أقرب مطعم لهالفندق؟
13993	corpus-6-test-corpus-26-train	MSA	أريد شامبو للشعر العادي .	بدي شامبو للشعر العادي.	بدي شامبو للشعر العادي.		بدي شامبو للشعر العادي.
14008	corpus-6-test-corpus-26-train	MSA	متى تعتقد سيتم إيجادها ؟	متى بتتوقع راح يلاقوه؟	متى بتتوقع راح يلاقوه؟		متى بتظن رح يلاقوها؟	سيتم	رح	إيجادها	يلاقوها
14014	corpus-6-test-corpus-26-train	MSA	أتمنى لك عاما سعيدا جدا .	بتمنالك سنة سعيدة.	بتمنالك سنة سعيدة.		بتمنالك سنة سعيدة كثير.	جدا	كثير	عام	سنة
14018	corpus-6-test-corpus-26-train	MSA	سوف أتناول زجاجة سبرايت كبيرة .	بدي سبرايت حجم كبير.	بدي سبرايت حجم كبير.		رح أشرب قنينة سبرايت كبيرة.	زجاجة	قنينة
14043	corpus-6-test-corpus-26-test	MSA	من فضلك كررها مرة أخرى ببطء أكثر .	لو سمحت إحكيه مرة تانية أبطئ شوي.	لو سمحت إحكيه مرة تانية أبطئ شوي.		من فضلك عيدها مرة ثانية أبطء شوي.	ككرها	عيدها	أخرى	ثانية
14045	corpus-6-test-corpus-26-train	MSA	معذرة . أريد أن أطلب طلب .	لو سمحت. بدي أحط طلبية.	لو سمحت. بدي أحط طلبية.		معلش . بدي أطلب طلب .	معذرة	معلش
14059	corpus-6-test-corpus-26-test	MSA	عندنا جمبري بصلصة النيوبرج ورجل حمل مشوية .	عنا روبيان من نيوبيرغ ورجل خاروف مشوي.	عنا روبيان من نيوبيرغ ورجل خاروف مشوي.		عنا شريمب بصلصة النيوبرغ موزة خروف مشوية.	لحم الرجل	موزة	حمل	خروف
14069	corpus-6-test-corpus-26-train	MSA	أريد غرفة بمنظر جميل .	بدي غرفة مع إطلالة حلوة.	بدي غرفة مع إطلالة حلوة.		بدي غرفة مع إطلالة حلوة.	منظر	إطلالة
14074	corpus-6-test-corpus-26-train	MSA	ثلاثة أقداح من عصير الشمام ، من فضلك .	تلت كاسات عصير بطيخ، لو سمحت.	تلت كاسات عصير بطيخ، لو سمحت.		ثلاث كاسات من عصير الشمام، لو سمحت.	أقداح	كاسات
14086	corpus-6-test-corpus-26-train	MSA	عندي ثلاثة أطفال .	عندي تلت أطفال.	عندي تلت أطفال.		عندي ثلاث ولاد.	أطفال	ولاد
14088	corpus-6-test-corpus-26-train	MSA	سر للأمام إلى آخر هذه القاعة وانعطف يسارا عند الركن . سوف تجدها على يمينك .	ضلك ماشي دغري لأخر هاي القاعة وروح شمال من عندك الزاوية. راح تشوفه على يمينك.	ضلك ماشي دغري لأخر هاي القاعة وروح شمال من عندك الزاوية. راح تشوفه على يمينك.		إمشي لقدام لاخر هالصالة ولف شمال عند الركن. بتلاقيها على يمينك.	قاعة	صالة	سر	إمشي
14089	corpus-6-test-corpus-26-dev	MSA	هل هي جولة يوم كامل ؟	هاي الرحلة يوم كامل؟	هاي الرحلة يوم كامل؟		هي الرحلة ليوم كامل؟	جولة	رحلة
14094	corpus-6-test-corpus-26-train	MSA	كم تبلغ تكلفة تذكرة ذهاب وعودة إلى أوكسفورد ؟	كم بتكلف تذكرة روحة ورجعة على أكسفورد؟	كم بتكلف تذكرة روحة ورجعة على أكسفورد؟		قدايش بتكلف تذكرة روحة رجعة لأوكسفورد؟	ذهاب	روحة	إياب	رجعة
14098	corpus-6-test-corpus-26-train	MSA	اذهب إلى نادي رياضي كل يومين .	أنا بروح على نادي رياضي كل يومين.	أنا بروح على نادي رياضي كل يومين.		روح عالجيم كل يومين.
14099	corpus-6-test-corpus-26-train	MSA	أين يمكنني أن أقيم أثناء الجولة ؟	وين بقدر أضل خلال الرحلة؟	وين بقدر أضل خلال الرحلة؟		وين ممكن أسكن خلال الرحلة؟	أقيم	أسكن	أثناء	خلال
14104	corpus-6-test-corpus-26-train	MSA	ما توقيت إجراءات مغادرة الفندق ؟	متى موعد تسجيل الخروج؟	متى موعد تسجيل الخروج؟		متى منقدر نعمل الاجراءات حتى نطلع من الفندق؟	نغادر	نطلع
14108	corpus-6-test-corpus-26-train	MSA	كم يتقاضى المرشد في اليوم ؟	كم أجرة الدليل لكل يوم؟	كم أجرة الدليل لكل يوم؟		قديش بيوخذ الدليل باليوم؟	مرشد	دليل
14120	corpus-6-test-corpus-26-train	MSA	أين أجد الاسطوانات المدمجة ؟	وين بقدر ألاقي سيديات؟	وين بقدر ألاقي سيديات؟		وين بلاقي السيديات؟	إسطوانات مدمجة	سيديات
14147	corpus-6-test-corpus-26-train	MSA	معذرة . أنا طالب جامعي من اليابان . هل أنتم طلاب في جامعة نيويورك ؟	عفوا. أنا طالب جامعي من اليابان. انتوا طلاب من نيويورك؟	عفوا. أنا طالب جامعي من اليابان. انتوا طلاب من نيويورك؟		معلش، أنا طالب جامعي من اليابان. إنتوا طلاب بجامعة نيو يورك؟	انتم	إنتو
14150	corpus-6-test-corpus-26-train	MSA	هل من الممكن أن تخبرنا كيف تقيم هذه الخطة ؟	ممكن تحكيلنا عن تقييمك لهاي الخطة؟	ممكن تحكيلنا عن تقييمك لهاي الخطة؟		ممكن تحكيلنا كيف بتعمل هاي الخطة ؟	تخبرنا	تحكيلنا	تقيم	تعمل
14167	corpus-6-test-corpus-26-train	MSA	أكي ، هل تعرف محل تسجيلات قريب من هنا ؟	آكي، بتعرف محل تسجيل قريب من هون؟	آكي، بتعرف محل تسجيل قريب من هون؟		أكي، بتعرف محل تسجيلات قريب من هون؟	بالقرب	قريب
14168	corpus-6-test-corpus-26-train	MSA	نقدا أم ببطاقة الائتمان ؟	كاش وإلا شحن؟	كاش وإلا شحن؟		كاش ولا بالفيزا؟	نقد	كاش
14174	corpus-6-test-corpus-26-train	MSA	أعمل في شركة تجارية .	أنا بشتغل بشركة تجارية.	أنا بشتغل بشركة تجارية.		أني بشتغل بشركة تجارية.	أعمل	بشتغل
14175	corpus-6-test-corpus-26-train	MSA	ليس من الأدب أن تسأل الناس كم يتقاضون .	مش من الأدب تسأل الناس عن معاشاتهم.	مش من الأدب تسأل الناس عن معاشاتهم.		مش من الأدب تسأل الناس قديش بوخذوا .	ليس	مش	كم	قديش
14184	corpus-6-test-corpus-26-train	MSA	هل هذه من نوع ليفي خمسة صفر المعتمدة ؟	هدول ليفايس أصلي خمسمية وواحد؟	هدول ليفايس أصلي خمسمية وواحد؟		هاي من نوع ليفي خمسة صفر الأصلية؟	معتمدة	أصلي
14195	corpus-6-test-corpus-26-train	MSA	متى يمكنني أن آخذ حماما ؟	أي ساعة بقدر أتحمم؟	أي ساعة بقدر أتحمم؟		متى بقدر أوخذ دش؟	حمام	دش
14198	corpus-6-test-corpus-26-train	MSA	لا تبدوا أكثر من إحدى وعشرون سنة من العمر .	ما بتبين أكبر من واحد وعشرين سنة.	ما بتبين أكبر من واحد وعشرين سنة.		ما بتبين أكثر من واحد وعشرين سنة عمرها.	تبدو	بتبين
14219	corpus-6-test-corpus-26-train	MSA	أفهم . في الواقع إنه به فيلم عالي السرعة . هل تمانع إذا أخرجته ؟	فهمت. فعلاً، فيها فيلم سريع- كتير. بتمانع إذا أخدتها برا؟	فهمت. فعلاً، فيها فيلم سريع- كتير. بتمانع إذا أخدتها برا؟		فهمت. فعلاً هو فيه فلم سرعته عالية. بتمانع لو طلعته؟	أخرجته	طلعته	في الواقع	فعلاً
14224	corpus-6-test-corpus-26-train	MSA	اشتراها الآن فقط .	إشتراه هلأ.	إشتراه هلأ.		شتراها هسه بس.	فقط	بس	الآن	هسا
14232	corpus-6-test-corpus-26-train	MSA	سوف أحضر واحدة في الحال .	راح أجيب واحد هلأ.	راح أجيب واحد هلأ.		راح أجيب وحدة مباشرة.	أحضر	أجيب	في الحال	مباشرة
14235	corpus-6-test-corpus-26-train	MSA	ثمانية دولارات . وهنا تأتي واحدة حالا .	تمانين دولار. وفي واحد جاي هون هلأ.	تمانين دولار. وفي واحد جاي هون هلأ.		ثمن دولرات. وهون بتيجي وحدة هسا.	واحدة	وحدة	تأتي	تيجي
14242	corpus-6-test-corpus-26-train	MSA	من فضلك أظهرها مع المشتريات في الجمارك في المطار .	لو سمحت طلعه مع الأغراض اللي اشتريتهم لجمارك المطار.	لو سمحت طلعه مع الأغراض اللي اشتريتهم لجمارك المطار.		لو سمحت، طلعها مع الاغراض اللي اشتريتهن بالجمارك بالمطار.	أظهرها	طلعها
14261	corpus-6-test-corpus-26-train	MSA	هل أي من المتاجر الكبيرة به يعمل الآن ؟	أي واحد من المحلات الشاملة عامل تخفيضات هلأ؟	أي واحد من المحلات الشاملة عامل تخفيضات هلأ؟		في أي مول فاتحة هسه؟	يعمل	فاتح
14265	corpus-6-test-corpus-26-train	MSA	يا عامل الاتصال ، وصلني بمحطة الإطفاء .	موظف المكالمات، اعطيني محطة الاطفاء.	موظف المكالمات، اعطيني محطة الاطفاء.		يا اللي بتشتغل بالاتصالات، اشبكني مع الدفاع المدني.	وصلني	اشبكني
14266	corpus-6-test-corpus-26-train	MSA	لقد حصلت على بطارية فارغة .	اشتريت بطارية خربانة.	اشتريت بطارية خربانة.		بطاريتي صارت فاضية.	فارغة	فاضية
14289	corpus-6-test-corpus-26-train	MSA	توقف عند التقاطع القادم .	وقف عند التقاطع التاني.	وقف عند التقاطع التاني.		وقّف عند التقاطع الجاي.	القادم	الجاي	توقف	وقف
14292	corpus-6-test-corpus-26-train	MSA	آه ، ها هي . هل ينبغي على كل شخص أن يملأ استمارة الإقرار الجمركي هذه ؟	اه، هيو. لازم كل شخص يعبي بيان الجمارك هاد؟	اه، هيو. لازم كل شخص يعبي بيان الجمارك هاد؟		آه، هيها . كل واحد لازم يعبي هاي الاستمارة للجمرك؟	يملأ	يعبي
14304	corpus-6-test-corpus-26-train	MSA	ممكن أعرف اسمك من فضلك ؟	ممكن أعرف اسمك؟	ممكن أعرف اسمك؟		ممكن أعرف اسمك لو سمحت؟
14306	corpus-6-test-corpus-26-train	MSA	هل من الممكن إجراء اتصال على أن يتم تحصيل أجرته من الطرف الآخر ؟	بقدر اعمل مكالمة و يكون حسابها على الملتقي؟	بقدر اعمل مكالمة و يكون حسابها على الملتقي؟		ممكن أعمل مكالمة وتوخذوا حقها من الطرف الثاني؟	ثمنها	حقها	الآخر	الثاني
14311	corpus-6-test-corpus-26-train	MSA	مرحبا . كيف حالك ؟	مرحبا. كيف حالك؟	مرحبا. كيف حالك؟		مرحبا . كيف حالك؟
14317	corpus-6-test-corpus-26-train	MSA	أين قسم السفر ؟	وين قسم السفر؟	وين قسم السفر؟		وين قسم السفر؟	أين	وين
14336	corpus-6-test-corpus-26-train	MSA	ما اسم الشخص الذي تود التحدث إليه ؟	شو إسم الشخص اللي بدك تحكي معه؟	شو إسم الشخص اللي بدك تحكي معه؟		شو اسم الشخص اللي بدك تحكي معه؟	الذي	اللي	تتحدث	تحكي
14347	corpus-6-test-corpus-26-test	MSA	أنا آسف ، هو ليس بالداخل الآن .	أنا آسف، هو مش موجود حالياً.	أنا آسف، هو مش موجود حالياً.		أني آسف، هو مش جوا هسا.	بالداخل	جوا
14363	corpus-6-test-corpus-26-train	MSA	أنظر إلى هذا . انظر إلى هذا . سوف تخبرني أن الاختلاف بين هذا الشاب وذلك الشاب هو الحظ ؟ محمد ، يقف بالسيارة في جانب الطريق ، وأنت ؟ لن تمانع في أن أنام معك هنا . أنا متأخر . كان لقاء جميل معك ؟	إتطلع على هاد. إتطلع على هاد. بدك تحكيلي إنه الفرق بين هاد الشب وهاد الشب الحظ؟ محمد، وقف على جنب، ممكن؟ إنت ما بتمانع إذا نزلتك هون. أنا متأخر. صديقي، تشرفت بمعرفتك، اوكيه؟	إتطلع على هاد. إتطلع على هاد. بدك تحكيلي إنه الفرق بين هاد الشب وهاد الشب الحظ؟ محمد، وقف على جنب، ممكن؟ إنت ما بتمانع إذا نزلتك هون. أنا متأخر. صديقي، تشرفت بمعرفتك، اوكيه؟		شوف هاظ. شوف هاظ. راح تحكيلي انو الفرق بين هالشب وهذاك الشب هو الحظ؟ محمد، واقف بالسيارة على زقاق الشارع، وإنت؟ ما راح تعترض اذا قعدت معك هون. انا تأخرت. كان لقاء حلو معك؟	انظر	شوف	شاب	شب
14373	corpus-6-test-corpus-26-dev	MSA	هل غرفتك تطل على المدينة ؟	غرفتك بتطل على المدينة؟	غرفتك بتطل على المدينة؟		بتطل غرفتك على البلد؟	مدينة	بلد
14389	corpus-6-test-corpus-26-train	MSA	أية رسائل لي ؟	في أي رسائل إلي؟	في أي رسائل إلي؟		في أي رسايل إلي؟	رسائل	رسايل
14400	corpus-6-test-corpus-26-test	MSA	لا زالت غالية جدا . هل من الممكن أن آخذها بثلاثة دولارات ؟	لسا كتير غالي. ممكن آخده بتلاتة دولار؟	لسا كتير غالي. ممكن آخده بتلاتة دولار؟		بعدها غالية كثير. ممكن أشتريها بـثلث دولارات؟	لا زالت	بعدها
14402	corpus-6-test-corpus-26-train	MSA	نريد غرفة في الخلف .	بدنا غرفة خلفية.	بدنا غرفة خلفية.		بدنا غرفة من ورا.	خلف	ورا
14403	corpus-6-test-corpus-26-dev	MSA	سوف أتناول كأسا من النبيذ .	راح آخد كاسة خمر.	راح آخد كاسة خمر.		راح أشرب كاس من الواين.	كأس	كاس
14416	corpus-6-test-corpus-26-train	MSA	تبدو جميلا .	شكلك حلو.	شكلك حلو.		بتبين حلو.	جميل	حلو
14426	corpus-6-test-corpus-26-test	MSA	أريد غرفة بسريرين . ما ثمن الغرفة في الليلة ؟	بدي غرفة مزدوجة. كم تكلفة الغرفة لكل ليلة؟	بدي غرفة مزدوجة. كم تكلفة الغرفة لكل ليلة؟		بدي غرفة بتختين. قديش تكلفة الغرفة بالليل؟	سرير	تخت	ثمن	تكلفة
14434	corpus-6-test-corpus-26-train	MSA	إنها تبعد حوالي تسعة وتسعون ميلا .	بتبعد حوالي تسعة وتسعين ميل.	بتبعد حوالي تسعة وتسعين ميل.		هي بتبعد حوالي تسعة وتسعين ميل.	إنها	هي
14441	corpus-6-test-corpus-26-train	MSA	فينس وليندا يريدان أن يبقيا بمفرديهما ، لذا أخشى أنني لا بد أن أبقى هنا هذه الليلة .	فينس وليندا بدهم يضلو لحالهم الليلة، فآسف إني لازم أضل هون الليلة.	فينس وليندا بدهم يضلو لحالهم الليلة، فآسف إني لازم أضل هون الليلة.		فينس وليندا بدهم يظلوا لحالهم، فبخاف انو لازم اظل هون الليلة.	أبقى	أظل	بفرديهما	لحالهم
14444	corpus-6-test-corpus-26-train	MSA	من فضلك احفظ هذه الحقائب في محتجز الجمارك .	لو سمحت خلي هاي الشنط مربوطة.	لو سمحت خلي هاي الشنط مربوطة.		لو سمحت خلي هالشنتات بالجمارك.	احفظ	خلي	حقائب	شنتات
14448	corpus-6-test-corpus-26-train	MSA	اسمي ساتو .	إسمي ساتو.	إسمي ساتو.		إسمي ساتو .
14457	corpus-6-test-corpus-26-train	MSA	أعرف نادي قديم لموسيقى الجاز بوسط البلد .	أنا بعرف نادي جاز قديم بوسط البلد.	أنا بعرف نادي جاز قديم بوسط البلد.		بعرف نادي قديم لموسيقى الجاز بوسط البلد.
14459	corpus-6-test-corpus-26-train	MSA	سأتناول هذه الوجبة .	راح آخد هاي الوجبة الثابتة.	راح آخد هاي الوجبة الثابتة.		رح أوكل هاي الأكلة.	أتناول	أوكل
14462	corpus-6-test-corpus-26-dev	MSA	أود أن أتتناول طبقا مثل هذا .	حابب أجرب نفس طبق الأكل هداك.	حابب أجرب نفس طبق الأكل هداك.		بدي أوكل صحن زي هاظ.	طبق	صحن
14475	corpus-6-test-corpus-26-train	MSA	حينئذ سنأخذها .	وبعدين راح ناخده.	وبعدين راح ناخده.		بهالوقت رح نوخذها.	حينئذ	بهالوقت
14477	corpus-6-test-corpus-26-train	MSA	هل يصعد هذا إلى الدور السادس ؟	هاد بطلع فوق للطابق السادس؟	هاد بطلع فوق للطابق السادس؟		هاذ بطلع للطابق السادس؟	يصعد	بطلع	دور	طابق
14478	corpus-6-test-corpus-26-dev	MSA	جلد التمساح الأمريكي .	جلد التمساح الأمريكي .	جلد التمساح الأمريكي .		جلد التمساح الأمريكي.
14483	corpus-6-test-corpus-26-train	MSA	من فضلك ضعه في كيس الغسيل و اتركه هناك .	لو سمحت حطه بشنتة غسيل وإتركه هناك.	لو سمحت حطه بشنتة غسيل وإتركه هناك.		لو سمحت، حطه بكيس الغسيل و خليه هنيك.	اتركه	خليه	ضعه	حطه
14484	corpus-6-test-corpus-26-train	MSA	أود تحميض هذا الفيلم . متي سيكون جاهزا ؟	بدي احمض هاد الفيلم. متى راح تكون جاهز؟	بدي احمض هاد الفيلم. متى راح تكون جاهز؟		بدي أحمض هالفلم. متى رح يكون جاهز؟	فيلم	فلم
14495	corpus-6-test-corpus-26-dev	MSA	من فضلك لا تعطي هذا المفتاح لأي شخص آخر غيري .	لو سمحت لا تعطي هاد المفتاح لأي حد غير حالك.	لو سمحت لا تعطي هاد المفتاح لأي حد غير حالك.		إذا بتسمح ما تنطي هاذ المفتاح لحدا غيري.	شخص	حدا	تعطي	تنطي
14500	corpus-6-test-corpus-26-test	MSA	و هو كذلك . سأمر عليك و آخذك بالسيارة من الفندق الذي تقيم فيه في الساعة الثامنة .	هو هيك. راح امر آخدك من الفندق الساعة تمنية.	هو هيك. راح امر آخدك من الفندق الساعة تمنية.		و هو هيك . رح أمر عليك و اخذك بالسيارة من الفندق اللي إنت قاعد فيه عالساعة ثمنية.	تقيم	قاعد	ثامنة	ثمنية
14502	corpus-6-test-corpus-26-train	MSA	النافذة جيدة	الشباك منيح.	الشباك منيح.		الشباك كويس	نافذة	شباك
14505	corpus-6-test-corpus-26-train	MSA	اجعل قصة الشعر تتدلى لأسفل , من فضلك .	خلي تسريحتي الباف نازلة، لو سمحت.	خلي تسريحتي الباف نازلة، لو سمحت.		خلي قصة الشعر تنزل لتحت، لو سمحت.	تتدلى	تنزل	اجعل	خلي
14507	corpus-6-test-corpus-26-train	MSA	هل تم إدراج جميع تكاليف النقل ؟	كل مصاريف المواصلات مضمونة من السعر؟	كل مصاريف المواصلات مضمونة من السعر؟		كل تكاليف الشحن انحسبت ؟	إدراج	انحسبت
14509	corpus-6-test-corpus-26-train	MSA	أوبرا ميتروبوليتان .	بيت الأوبيرا المطراني.	بيت الأوبيرا المطراني.		أوبرا المتروبوليتان.
14514	corpus-6-test-corpus-26-train	MSA	أين مكان تأجير السيارات ؟	وين مكتب تأيجرالسيارات؟	وين مكتب تأيجرالسيارات؟		وين مكان تأجير السيارات؟
14519	corpus-6-test-corpus-26-dev	MSA	اشعر بأنني ملئ بالحيوية منذ الليلة الماضية .	أنا مسخن من الليلة الماضية.	أنا مسخن من الليلة الماضية.		حاس إني مليان طاقة من امبارح الليل.	ملئ	مليان	أشعر	حاس
14520	corpus-6-test-corpus-26-train	MSA	هذا لا يناسب ذوقي .	هاد مش زوقي.	هاد مش زوقي.		هاذ مش عزوقي.	ذوقي	زوقي
14530	corpus-6-test-corpus-26-train	MSA	ما أنواع الخضراوات الموجودة لديك ؟	شو عندك خضار؟	شو عندك خضار؟		شو هي الخضرة اللي عندك؟	خضروات	خضرة
14531	corpus-6-test-corpus-26-test	MSA	أريد عمل تمويجا لشعري ليكون طليقا .	بدي كيرلي خفيف، لو سمحت.	بدي كيرلي خفيف، لو سمحت.		بدي أعمل كيرلي لشعري عشان اخليه مفرود.	طليقا	مفرود			تمويج شعر :كيرلي
14534	corpus-6-test-corpus-26-train	MSA	متي سيأتي الطبيب ؟	متى راح يجي الدكتور؟	متى راح يجي الدكتور؟		متى رح يجي الدكتور؟	يأتي	يجي	الطبيب	الدكتور
14537	corpus-6-test-corpus-26-train	MSA	انه اللون الخاطئ .	هاد اللون غلط.	هاد اللون غلط.		هاظا اللون غلط.	خاطئ	غلط
14538	corpus-6-test-corpus-26-train	MSA	لقد انكسرت السنة .	السن إنكسر.	السن إنكسر.		انكسرت السنة.
14542	corpus-6-test-corpus-26-train	MSA	هل هذا المقعد بجوار الممر أم بجوار النافذة ؟	هاد الكرسي بجنب الممر والا اللي بجنب الشباك؟	هاد الكرسي بجنب الممر والا اللي بجنب الشباك؟		هاذ الكرسي جنب الممر ولا جنب الشباك؟	مقعد	كرسي	جوار	جنب
14557	corpus-6-test-corpus-26-train	MSA	أنا في نزهة طويلة سيرا على الأقدام .	أنا رايح مشوار.	أنا رايح مشوار.		أني طالعة برحلة طويلة تمشاية عجري.	سيرا	تمشاي	طويلة	رحلة
14564	corpus-6-test-corpus-26-dev	MSA	هل يمكنك أن توصل أمتعتي إلى الغرفة ؟	بتقدر توصلي شنطي على الغرفة؟	بتقدر توصلي شنطي على الغرفة؟		ممكن توصل اغراضي للغرفة؟	أمتعتي	اغراضي
14573	corpus-6-test-corpus-26-train	MSA	أرني واحدة لإحدى الشابات .	ورجيني واحد لصبية صغيرة.	ورجيني واحد لصبية صغيرة.		وريني وحدة لوحدة من الصبايا.	شابات	صبايا	لإحدى	لوحدة
14590	corpus-6-test-corpus-26-train	MSA	هل يمكنك أن تتحرك بهذا الاتجاه ؟	ممكن تتحرك بهاد الاتجاه؟	ممكن تتحرك بهاد الاتجاه؟		بتقدر تمشي بهالجهة؟	اتجاه	جهة
14593	corpus-6-test-corpus-26-dev	MSA	هل لديك أي شيء يبلغ سعره ثمانون دولارا فقط ؟	عندك أي إشي بحوالي تمانين دولار بالظبط؟	عندك أي إشي بحوالي تمانين دولار بالظبط؟		عندك اشي بسعر ثمانين دولر بس؟	شيء	إشي
14605	corpus-6-test-corpus-26-train	MSA	أنا ظمآن .	أنا عطشان.	أنا عطشان.		أني عطشان.	ظمآن	عطشان
14612	corpus-6-test-corpus-26-train	MSA	بدون حليب , من فضلك .	بدون حليب، لو سمحت.	بدون حليب، لو سمحت.		بدون حليب, لو سمحت.
14683	corpus-6-test-corpus-26-dev	MSA	لدي ثلاث حقائب .	عندي تلت شنط.	عندي تلت شنط.		عندي ثلث شناتي.	لدي	عندي
14685	corpus-6-test-corpus-26-train	MSA	أين البحيرة ؟	وين البحيرة؟	وين البحيرة؟		وين البحيرة؟
14693	corpus-6-test-corpus-26-test	MSA	معذرة , قم بالضغط على مصراعي النافذة الخشبيين , من فضلك .	عفواً. إكبس كبسة التصوير، لو سمحت.	عفواً. إكبس كبسة التصوير، لو سمحت.		عفواً، نزل اباجور الشباك الخشب , لو سمحت.	مصراع	اباجور
14709	corpus-6-test-corpus-26-train	MSA	هل يمكن أن احصل على احدى المجلات أو شيئ من هذا القبيل ؟	ممكن آخد جريدة أو إشي زي هيك؟	ممكن آخد جريدة أو إشي زي هيك؟		ممكن أوخذ وحدة من المجلات أو شي زي هيك؟	قبيل	زي	احصل	أوخذ
14718	corpus-6-test-corpus-26-train	MSA	انها باتجاه الجنوب .	باتجاه الجنوب.	باتجاه الجنوب.		هي باتجاه الجنوب.
14721	corpus-6-test-corpus-26-train	MSA	ما تكلفة المقاعد الخاصة بالشرفة ؟	قديش يتكلفة الكراسي يلي عالبرندة؟	قديش يتكلفة الكراسي يلي عالبرندة؟		قديش بتكلف الكراسي تبعت البرندة؟	شرفة	برندة	الخاصة	تبعت
14734	corpus-6-test-corpus-26-test	MSA	نرغب في حجرة تطل على البحيرة .	بدنا غرفة مطلة على البحيرة.	بدنا غرفة مطلة على البحيرة.		حابين غرفة بتطل على البحيرة.	حجرة	غرفة	نرغب	حابين
14737	corpus-6-test-corpus-26-train	MSA	هل هناك أي صناديق بريد قريبة من هنا ؟	في أي صناديق بريد قريبة من هون؟	في أي صناديق بريد قريبة من هون؟		فيه صناديق بريد قريبة من هون؟	هناك	فيه
14757	corpus-6-test-corpus-26-train	MSA	و هو كذلك . سأوصلك إلى هناك .	هو هيك. راح آخدك هناك.	هو هيك. راح آخدك هناك.		و هو هيك . رح اوصلك لهناك.	كذلك	هيك
14761	corpus-6-test-corpus-26-train	MSA	الجزء المكتوب بالطريقة المائلة يشير إلى التغييرات التي حدثت في التسعينات .	الجزء المكتوب بالخط المايل بيشير للتغيرات اللي صارت بالتسعينات.	الجزء المكتوب بالخط المايل بيشير للتغيرات اللي صارت بالتسعينات.		الجزء اللي مكتوب بالطريقة المايلة بدل على التغييرات اللي صارت بالتسعينات.	مائلة	مايلة	يشير	بدل
14763	corpus-6-test-corpus-26-train	MSA	أنه يبلغ من العمر ثلاثون عاما .	هو عمره تلاتين سنة.	هو عمره تلاتين سنة.		هو عمره ثلاثين سنة.
14777	corpus-6-test-corpus-26-test	MSA	وهو كذلك . هل يمكنك كتابة العنوان مرة أخرى علي هذا الظرف ؟	هو هيك. ممكن تكتب العنوان مرة تانية بهاد الظرف؟	هو هيك. ممكن تكتب العنوان مرة تانية بهاد الظرف؟		و هو هيك. بتقدر تكتب العنوان مرة ثانية على هالظرف؟	يمكنك	بتقدر
14783	corpus-6-test-corpus-26-train	MSA	أود الذهاب إلى محل الهارودز . هل معك خريطة , من فضلك ؟	بدي أروح على هارودز. ممكن ترسملي خريطة، لو سمحت؟	بدي أروح على هارودز. ممكن ترسملي خريطة، لو سمحت؟		بدي اروح على محل الهارودز. معك خريطة, لو سمحت؟	أذهب	أروح
14786	corpus-6-test-corpus-26-train	MSA	ما ذا تفعل في وقت فراغك ؟	شو بتعمل لما يكون عندك وقت فراغ؟	شو بتعمل لما يكون عندك وقت فراغ؟		شو بتعمل بوقت فراغك؟	تفعل	تعمل
14789	corpus-6-test-corpus-26-train	MSA	هل لديك أحجار بطارية لهذه الكاميرا ؟	عندك بطاريات لهاي الكاميرا؟	عندك بطاريات لهاي الكاميرا؟		عندك بطاريات لهاي الكميرا؟	كاميرا	كميرا
14805	corpus-6-test-corpus-26-train	MSA	أود إرسال برقية لاسلكية .	بدي كابل للتصوير عن بعد.	بدي كابل للتصوير عن بعد.		بدي أبعث رسالة لاسلكية.	برقية	رسالة
14807	corpus-6-test-corpus-26-train	MSA	هل أنت الأخير في هذا الصف ؟	إنت الأخير بهاد الصف؟	إنت الأخير بهاد الصف؟		إنت الأخير بهاذ الصف؟
14810	corpus-6-test-corpus-26-train	MSA	أعتقد أن الحجز قد زاد عن العدد .	بتوقع إنه معبى نزلاء.	بتوقع إنه معبى نزلاء.		بظن إنو الحجز طلع زاد عن العدد.	أعتقد	بظن
14813	corpus-6-test-corpus-26-train	MSA	ركلة موفقة . كادت تدرك الهدف .	ضربة موفقة. كانت رح تجيب جول.	ضربة موفقة. كانت رح تجيب جول.		تسديدة موفقة. راحت ما تيجي جول.	ركلة	تسديدة	كادت	راحت
14818	corpus-6-test-corpus-26-train	MSA	هل يمكن أن تخبرني عن الأماكن الشيقة هنا ؟	ممكن تحكيلي الأماكن الحلوة هون؟	ممكن تحكيلي الأماكن الحلوة هون؟		ممكن تحكيلي عن الأماكن الحلوة هون؟	شيق	حلو	تخبرني	تحكيلي
14820	corpus-6-test-corpus-26-train	MSA	هل يوجد أي محل متعدد الأقسام قريب من هنا ؟	في أي محلات شاملة قريبة من هون؟	في أي محلات شاملة قريبة من هون؟		في أي مول قريب من هون؟	هنا	هون
14854	corpus-6-test-corpus-26-dev	MSA	و أنا كذلك .	و انا كمان.	و انا كمان.		وأني هيك .
14862	corpus-6-test-corpus-26-train	MSA	أود اللحاق بالسفر من سان دييجو .	أنا بدي أسافر من سان ديغو.	أنا بدي أسافر من سان ديغو.		بدي ألحق أسافر من سان دييجو.
14863	corpus-6-test-corpus-26-train	MSA	كنت أفكر في الحصول على هذه الدورة في فترة نصف العام المقبلة .	أنا كنت مفكر آخد الدورة الفصل الجاي.	أنا كنت مفكر آخد الدورة الفصل الجاي.		كنت بفكر أوخذ هالكورس بفترة نص السنة الجاية.	المقبلة	الجاية	أحصل	أوخذ
14887	corpus-6-test-corpus-26-train	MSA	النبيذ ليس باردا بشكل كافي . هل نمكنك أن تجعله أكثر برودة ؟	الخمر مش كتير بارد. ممكن تخليه أبرد؟	الخمر مش كتير بارد. ممكن تخليه أبرد؟		الواين مش بارد كفاية. ممكن تبرده اكثر؟	ليس	مش
14901	corpus-6-test-corpus-26-dev	MSA	هل يمكنك أن تغيير لي هذا القرط إلى أخرى يمكن أن تشبك .	ممكن تبدل هاد الحلق لواحد تاني ممكن يشبك؟	ممكن تبدل هاد الحلق لواحد تاني ممكن يشبك؟		بتقدر تغيرلي هالقرط لوحدة تانية يمكن تنشبك.
14903	corpus-6-test-corpus-26-train	MSA	ما هي أكثر الأشياء التي تثير اهتمامك الآن ؟	ايش أكتر إشي مهتم فيه حالياً؟	ايش أكتر إشي مهتم فيه حالياً؟		شو أكثر الأشياء اللي بتلفت انتباهك هسا ؟	تثير	بتلفت	ما	شو
14905	corpus-6-test-corpus-26-train	MSA	أريد إعادة المال . هل يمكن أن أحصل على مالي ؟	بدي ارجع المصاري . ممكن ترجعلي مصاريي ؟	بدي ارجع المصاري . ممكن ترجعلي مصاريي ؟		بدي أرجع المصاري. بقدر أوخذ مصرياتي؟	أعيد	أرجع	مالي	مصرياتي
14926	corpus-6-test-corpus-26-train	MSA	ربما لا يمكنني أن أتناول مثل هذا المشروب في أي مكان آخر .	أنا ممكن ما ألاقي شراب متل هاد بأي مكان تاني.	أنا ممكن ما ألاقي شراب متل هاد بأي مكان تاني.		يمكن ما بقدر أشرب هيك مشروب بأي مكان ثاني.	ربما	يمكن	أتناول	أشرب
14933	corpus-6-test-corpus-26-train	MSA	إذا اشتريت هذا أيضا , فستعمل للمبلغ الذي يعفي من الرسوم .	إذا اشتريت هاد كمان، بتكون وصلت لمبلغ معفي من الرسوم الجمركية.	إذا اشتريت هاد كمان، بتكون وصلت لمبلغ معفي من الرسوم الجمركية.		لو اشتريت هاظ كمان, رح توصل للمبلغ اللي بيعفي من الرسوم.	أيضا	كمان
14952	corpus-6-test-corpus-26-train	MSA	هل يمكنني أن أطلع على شهادة التطعيم الخاصة بك , من فضلك ؟	ممكن أشوف شهادة التطعيم، لو سمحت؟	ممكن أشوف شهادة التطعيم، لو سمحت؟		بقدر أشوف شهادة التطعيم تاعيتك، إذا سمحت؟	أطلع	أشوف	الخاصة بك	تاعيتك
14960	corpus-6-test-corpus-26-train	MSA	هل تسافر كثيرا ؟	بتسافر كتير؟	بتسافر كتير؟		بتسافر كثير؟
14969	corpus-6-test-corpus-26-train	MSA	أنا من الولايات المتحدة .	أنا من أمريكا.	أنا من أمريكا.		أني من أمريكا.
14976	corpus-6-test-corpus-26-train	MSA	معي تذكرة طيران إلى سان فرانسيسكو .	عندي تذكرة طيران على سان فرانسيسكو.	عندي تذكرة طيران على سان فرانسيسكو.		معي تذكرة طيران لـسان فرانسيسكو.
14998	corpus-6-test-corpus-26-train	MSA	لو إن المسافة خمسة عشرة دقيقة فقط من المحطة ، إذن سأمشيها .	إذا المسافة خمسطعشر دقيقة بس من المحطة، راح أمشي.	إذا المسافة خمسطعشر دقيقة بس من المحطة، راح أمشي.		لو المسافة خمسطعشر دقيقة بس من المجمع ، بمشيها لعاد.	إذن	لعاد	خمسة عشر	خمسطعشر
15019	corpus-6-test-corpus-26-train	MSA	أريد فندق أرخص قليلاً .	بدي فندق أرخص شوي.	بدي فندق أرخص شوي.		بدي فندق أرخص شوي.
15020	corpus-6-test-corpus-26-test	MSA	تبدو البونساي كهواية شخص هرم .	زراعة الشجر في العلب شكلها كانت متل هواية لشخص كبير.	زراعة الشجر في العلب شكلها كانت متل هواية لشخص كبير.		شكلها البونساي هواية الختيار.	تبدو	شكلها	هرم	ختيار
15024	corpus-6-test-corpus-26-dev	MSA	لم أقرر بعد . هل لك أن تعطيني وقتاً أكثر ؟	أنا لسا ما قررت لهلأ. ممكن تعطيني شوية وقت أكتر؟	أنا لسا ما قررت لهلأ. ممكن تعطيني شوية وقت أكتر؟		بعدني ما قررت. ممكن تعطيني وقت زيادة؟	لم	ما	أكثر	زيادة
15025	corpus-6-test-corpus-26-train	MSA	مصاب بالصداع .	عندي صداع.	عندي صداع.		عندي صداع.	صداع	عندي
15036	corpus-6-test-corpus-26-dev	MSA	هل تفضلت و احتسيت القهوة معي ؟	تفضل اشرب فنجان قهوة معي؟	تفضل اشرب فنجان قهوة معي؟		تتفضل و تشرب قهوة معي؟	تحتسي	تشرب
15037	corpus-6-test-corpus-26-train	MSA	أريد شهادة طبية وإيصال من أجل التأمين الخاص بي .	بدي تقرير طبي والوصل عشان تأميني.	بدي تقرير طبي والوصل عشان تأميني.		بدي شهادة طبية و وصل عشان التأمين تاعي.	إيصال	وصل	من أجل	عشان
15046	corpus-6-test-corpus-26-test	MSA	آه ، كلا . من فضلك أسرع . إننا متأخرون .	أووه، لأ. لو سمحت اسرع. إحنا متأخرين.	أووه، لأ. لو سمحت اسرع. إحنا متأخرين.		آه، لأ. لو سمحت عجل، إحنا متأخرين.	كلا	لأ	أسرع	عجّل
15051	corpus-6-test-corpus-26-train	MSA	لا أريد إنفاق أكثر من عشرين دولاراً .	ما بدي أصرف أكتر من عشرين دولار.	ما بدي أصرف أكتر من عشرين دولار.		ما بدي أصرف أكثر من عشرين دولار.	أنفق	أصرف
15062	corpus-6-test-corpus-26-train	MSA	لماذا لم تقلع الرحلة ؟ أخبرني عما يجري .	ليش الطيارة ما عم تقلع؟ إحكيلي شو عم بيصير.	ليش الطيارة ما عم تقلع؟ إحكيلي شو عم بيصير.		ليش ما طلعت الرحلة؟ قلي شو بصير.	يجري	بصير	أقلعت	طلعت
15073	corpus-6-test-corpus-26-test	MSA	كم الأجرة ؟ هل لك أن تدون الأجرة على قطعة ورق ؟	قديش الأجرة؟ ممكن تكتبلي الأجرة على ورقة؟	قديش الأجرة؟ ممكن تكتبلي الأجرة على ورقة؟		قديش الأجرة؟ ممكن تكتبها على شقفة ورقة؟	قطعة	شقفة	تدون	تكتب
15083	corpus-6-test-corpus-26-train	MSA	أريد استئجار كرسي مركب .	بدي استأجر كرسي.	بدي استأجر كرسي.		بدي أستأجر كرسي اتمدد عليه.	أسترخي	اتمدد
15087	corpus-6-test-corpus-26-train	MSA	انتظر دقيقة من فضلك .	استنى دقيقة، لو سمحت.	استنى دقيقة، لو سمحت.		استنى دقيقة لو سمحت.	انتظر	استنى
15088	corpus-6-test-corpus-26-test	MSA	هل على السيدات ارتداء فستان سهرة ؟	لازم الصبايا يلبسوا فساتين سهرة؟	لازم الصبايا يلبسوا فساتين سهرة؟		لازم الستات يلبسن فسطان سهرة؟	ارتداء	لبس	سيدات	ستات
15095	corpus-6-test-corpus-26-train	MSA	لا تلمسني .	ما تلمسني.	ما تلمسني.		ما تلمسني.
15109	corpus-6-test-corpus-26-train	MSA	هل معك سجائر ؟	معك دخان؟	معك دخان؟		معك دخان؟	سجائر	دخان
15123	corpus-6-test-corpus-26-train	MSA	يمكننا الذهاب إلى نقطة تيكي إذا لم تكن الريح قوية .	إذا ما كان الهوا كتير قوي، منقدر نروح على تيكي بوينت.	إذا ما كان الهوا كتير قوي، منقدر نروح على تيكي بوينت.		ممكن نروح على تيكي اذا ما كان الهوا قوي.	ريح	هوا	نذهب	نروح
15126	corpus-6-test-corpus-26-train	MSA	رائع .	حلو.	حلو.		بجنن.	رائع	بجنن
15133	corpus-6-test-corpus-26-train	MSA	سأغلق الآن . شكراً على انتباهكم .	راح أسكر هلأ. شكراً إلك على اهتمامك.	راح أسكر هلأ. شكراً إلك على اهتمامك.		رح أسكر هسا. شكراً على انتباهكو.	أغلق	أسكر
15145	corpus-6-test-corpus-26-dev	MSA	هل لديك ألوان أخرى من هذا ؟	عندك الوان تانيه من هاد ؟	عندك الوان تانيه من هاد ؟		عندك ألوان ثانية من هاذ؟	هذا	هاذ
15149	corpus-6-test-corpus-26-train	MSA	من هذا ؟	مين هاد؟	مين هاد؟		مين هاظا؟	من	مين
15157	corpus-6-test-corpus-26-train	MSA	معذرة . هل لك أن تدلني على مكان موقف سيارات الأجرة ؟	عفواً، ممكن تحكيلي وين في موقف تاكسي؟	عفواً، ممكن تحكيلي وين في موقف تاكسي؟		معلش، بتقدر تدلني على موقف سيارات التكسي؟	معذرة	معلش
15170	corpus-6-test-corpus-26-train	MSA	وللشرب ؟ .	وللشرب؟	وللشرب؟		بتشرب إشي ؟ .
15181	corpus-6-test-corpus-26-train	MSA	هاهي .	هيو.	هيو.		هيها .	هاهي	هيها
15201	corpus-6-test-corpus-26-train	MSA	أين يوجد أقرب متجر لأجهزة الكمبيوتر ؟	وين أقرب محل كومبيترات؟	وين أقرب محل كومبيترات؟		وين أقرب محل لأجهزة الكمبيوتر ؟	متجر	محل
15206	corpus-6-test-corpus-26-train	MSA	هه . إنها لا تعمل ، أليس كذلك ؟ يمكنك الانتقال إلى مقعد شاغر إذا كنت تريد ذلك .	مممم. ما بشتغل، صح؟ ممكن تنقل على مقعد فاضي، إذا بتحب.	مممم. ما بشتغل، صح؟ ممكن تنقل على مقعد فاضي، إذا بتحب.		هه. ما بتشتغل، صح ؟ بتقدر تروح عكرسي فاضي اذا بدك .	شاغر	فاضي	تنتقل	تروح
15221	corpus-6-test-corpus-26-train	MSA	إنني أبحث عن هذا .	أنا بدور على هاد.	أنا بدور على هاد.		أني بدور على هاظ.	أبحث	بدور
15240	corpus-6-test-corpus-26-train	MSA	حسناً سيدي . وما الحلو الذي تريد أن تختم به الطعام ؟	تمام أستاذ. وشو بدك حلويات؟	تمام أستاذ. وشو بدك حلويات؟		طيب يا استاذي.. شو الحلو اللي بدك تختم فيه الأكل ؟	الطعام	الأكل	سيدي	استاذي
15246	corpus-6-test-corpus-26-train	MSA	حافلة عادية أم حافلة مجهزة للنوم ؟	باص عادي ولا باص مجهز للنوم؟	باص عادي ولا باص مجهز للنوم؟		باص عادي ولا باص مجهز للنوم ؟	حافلة	باص
15247	corpus-6-test-corpus-26-train	MSA	شيكات سياحية . شكراً . خذ تذكرتك وبطاقة المرور للصعود على متن الطائرة . كن هناك قبل وقت الرحلة بساعة من فضلك .	شيكات سياحية. شكراً إلك. هي تذكرتك وبطاقة الصعود تبعك. كون هناك، لو سمحت، قبل بساعة وحدة من رحلة الطيران.	شيكات سياحية. شكراً إلك. هي تذكرتك وبطاقة الصعود تبعك. كون هناك، لو سمحت، قبل بساعة وحدة من رحلة الطيران.		شيكات سياحية. شكراً. أخذ تذكرتك و الفيزا عشان تطلع على الطيارة. كون هناك قبل الرحلة بساعة لو سمحت.	طائرة	طيارة	خذ	أخذ
15257	corpus-6-test-corpus-26-test	MSA	إنه ألم حاد .	هاد وجع قوي.	هاد وجع قوي.		هو وجع قوي.	حاد	قوي
15259	corpus-6-test-corpus-26-train	MSA	الاسم هو جورو موتوياما . والرقم هو صفر ثلاثة ثلاثة اثنان ستة واحد اثنان أربعة تسعة خمسة .	الإسم غورو موتوياما. والرقم صفر تلاتة تلاتة اتنين ستة واحد اتنين أربعة تسعة خمسة.	الإسم غورو موتوياما. والرقم صفر تلاتة تلاتة اتنين ستة واحد اتنين أربعة تسعة خمسة.		الاسم هو جورو موتوياما . والرقم هو صفر ثلاثة ثلاثة اثنان ستة واحد اثنان أربعة تسعة خمسة .
15262	corpus-6-test-corpus-26-train	MSA	أشعر بمرض شديد .	حاسس حالي كتير مريض.	حاسس حالي كتير مريض.		بحس حالي مريض كثير.	أشعر	بحس	شديد	كثير
15274	corpus-6-test-corpus-26-train	MSA	ما موعد عرض " قصة حب كوسي " ؟	شو أوقات العرض ل "كوسيز لوف"؟	شو أوقات العرض ل "كوسيز لوف"؟		متى وقت عرض "قصة حب كوسي"؟	موعد	وقت
15283	corpus-6-test-corpus-26-train	MSA	حسناً . هل ستحتسي القهوة الآن أم فيما بعد ؟	تمام، بدك تشرب قهوتك هلأ والا بعدين؟	تمام، بدك تشرب قهوتك هلأ والا بعدين؟		ماشي. رح تشرب القهوة هسا ولا بعدين؟	فيما بعد	بعدين	حسناً	ماشي
15292	corpus-6-test-corpus-26-train	MSA	دلني على أكثر نوادي موسيقى الريجاي إثارة في نيويورك .	إحكيلي أسخن نادي ريغي في نيويوك.	إحكيلي أسخن نادي ريغي في نيويوك.		دلني على أحلى اندية موسيقى الريجاي في نيويورك.	نوادي	اندية
15295	corpus-6-test-corpus-26-test	MSA	ما وجه الاختلاف بين منتجك ومنتج منافسيك ؟	شو بختلف منتجكم عن اللي عند منافسينكم؟	شو بختلف منتجكم عن اللي عند منافسينكم؟		شو الفرق بين منتجك ومنتج الناس اللي بتنافسك؟	الاختلاف	الفرق
15296	corpus-6-test-corpus-26-train	MSA	هل من المقبول عدم اتباع أي شخص لتعليمات الأمن ؟	الوضع طبيعي إنه ما حدا عم بيسمع لتعليمات السلامة؟	الوضع طبيعي إنه ما حدا عم بيسمع لتعليمات السلامة؟		بصير حدا ما يتبع تعليمات الأمن؟	مقبول	بصير	شخص	حدا
15319	corpus-6-test-corpus-26-train	MSA	هل الشوارع الخلفية خطر ؟	الشارع الخلفي خطير؟	الشارع الخلفي خطير؟		الشوارع الخلفية خطرة ؟
15320	corpus-6-test-corpus-26-train	MSA	أجل . من فضلك اتخذ الإجراء الضروري .	صح. لو سمحت خد الإجراء الضروري.	صح. لو سمحت خد الإجراء الضروري.		نعم ، اعمل الإشي الضروري.	أجل	نعم	اتخذ	إعمل
15323	corpus-6-test-corpus-26-train	MSA	أجل ، واحدة فقط . متى سأعرف ؟ وكيف سيتم تعويضي ؟	اه، بس واحد. متى راح أعرف؟ كيف راح أتعوض؟	اه، بس واحد. متى راح أعرف؟ كيف راح أتعوض؟		أها، بس وحدة؟ متى رح أعرف؟ وكيف رح يكون التعويض؟	يتم	يكون	أجل	أها
15331	corpus-6-test-corpus-26-dev	MSA	هاهي بطاقة تحقيق الهوية الخاصة بي .	هيها بطاقة الهوية تبعتي.	هيها بطاقة الهوية تبعتي.		هاي الهوية تبعتي.	الخاصة بي	تبعتي
15337	corpus-6-test-corpus-26-train	MSA	نفضل مائدة بجوار النافذة .	بنفضل طاولة جنب الشباك.	بنفضل طاولة جنب الشباك.		بنحب طاولة جنب الشباك.	نفضل	بنحب	بجوار	جنب
15347	corpus-6-test-corpus-26-train	MSA	من فضلك دلني على أرخص وسيلة للذهاب إلى سان فرانسيسكو .	لو سمحت إحكيلي أرخص طريقة للروحة على سان فرانسيسكو.	لو سمحت إحكيلي أرخص طريقة للروحة على سان فرانسيسكو.		من فضلك دلني على أرخص طريقة حتى أروح على سان فرانسيسكو.	وسيلة	طريقة
15362	corpus-6-test-corpus-26-train	MSA	هل تعرف المطعم يا كيويا ؟	بتعرف المطعم، كيويا؟	بتعرف المطعم، كيويا؟		بتعرف المطعم يا كيويا؟
15378	corpus-6-test-corpus-26-train	MSA	اتجاه واحد .	اتجاه واحد.	اتجاه واحد.		اتجاه واحد.
15380	corpus-6-test-corpus-26-train	MSA	سأصبح بديناً في حال ما ظللت جالساً هنا آكل باستمرار .	راح أصير ناصح اذا بظل قاعد هون باكل دايما.	راح أصير ناصح اذا بظل قاعد هون باكل دايما.		رح أصير ناصح لو استمريت قاعد هون آكل دايما.	أصبح	أصير	بدين	ناصح
15400	corpus-6-test-corpus-26-train	MSA	هل يوجد ملهى ليلي جيد به عرض رقصة الفلامنكو ؟	في ملهى ليلي كويس مع عرض فلامنكو؟	في ملهى ليلي كويس مع عرض فلامنكو؟		في نايت كلوب رايق عنده رقصة الفلامنكو؟	جيد	رايق			ملهى ليلي : نايت كلوب
15419	corpus-6-test-corpus-26-train	MSA	جميل الفستان التي ترتدينه .	حلو الفستان اللي لابستيه.	حلو الفستان اللي لابستيه.		حلو الفسطان اللي لابسيته.	ترتديه	لابسيته	فستان	فسطان
15431	corpus-6-test-corpus-26-train	MSA	قدمي تؤلمني .	رجلي بتوجعني.	رجلي بتوجعني.		إجري بتوجعني.	قدمي	إجري
15436	corpus-6-test-corpus-26-train	MSA	أين توجد أقرب مغسلة ؟	وين أقرب مغسلة ؟	وين أقرب مغسلة ؟		وين اقرب مغسلة؟
15443	corpus-6-test-corpus-26-train	MSA	هل لك أن نبدل مقاعدنا من فضلك ؟	ممكن تبدل الكراسي معي، لو سمحت؟	ممكن تبدل الكراسي معي، لو سمحت؟		ممكن نبدل كراسينا لو سمحت؟	مقاعدنا	كراسينا
15447	corpus-6-test-corpus-26-train	MSA	تم الفصل بين مقاعدنا .	كراسينا صاروا مفرقين.	كراسينا صاروا مفرقين.		صار فصل بين كراسينا.	تم	صار
15452	corpus-6-test-corpus-26-train	MSA	في الواقع أريد استصدار صك تأمين على هذا الطرد أيضاً .	الصراحة، بدي اأمن هاد الطرد كمان.	الصراحة، بدي اأمن هاد الطرد كمان.		بالواقع بدي أطلع ورقة تأمين على هالطرد كمان.	أصدر	أطلع	صك	ورقة
15463	corpus-6-test-corpus-26-train	MSA	وصلت الفاتورة لمائة دولار .	الفاتورة وصلت ميت دولار.	الفاتورة وصلت ميت دولار.		وصلت الفاتورة لمية دولار.	مائة	مية
15464	corpus-6-test-corpus-26-test	MSA	تقع منافذ الخروج للطوارئ في مقدمة ووسط ومؤخرة هذه الطائرة .	مخارج الطوارئ موجودة في بداية، بنص، وبآخر هاي الطيارة.	مخارج الطوارئ موجودة في بداية، بنص، وبآخر هاي الطيارة.		الأبواب الطارئة بتكون قدام, وفالنص, وخلف الطيارة هاي.	أبواب	منافذ	مؤخرة	خلف
15470	corpus-6-test-corpus-26-train	MSA	حسناً ، تم إعادة التأكيد على حجزك .	تمام، عدنا تأكيد حجزك.	تمام، عدنا تأكيد حجزك.		ماشي، اتأكدنا من حجزك مرة ثانية.
15476	corpus-6-test-corpus-26-train	MSA	الكعب مرتفع جداً .	الكعب كتير عالي.	الكعب كتير عالي.		الكعب عالي كثير.	جداً	كثير	مرتفع	عالي
15477	corpus-6-test-corpus-26-train	MSA	نريد مائدة في الشرفة .	بدنا طاولة على الترس.	بدنا طاولة على الترس.		بدنا طاولة على البرندة.
15482	corpus-6-test-corpus-26-train	MSA	هذا يعني أن الفيلم ربما يكون غير مناسباً للأطفال تحت سن الخامسة عشر . لذلك فإن الآباء بحاجة إلى الأخذ بعين الاعتبار إذا ما كانوا سيدعون الأطفال يشاهدون الفيلم .	معناه إنه الفيلم ممكن ما يكون مناسب للأطفال تحت عمر خمسطعش. فالأهل لازم يفكروا إذا ممكن يخلوا أطفالهم يحضروا الفيلم.	معناه إنه الفيلم ممكن ما يكون مناسب للأطفال تحت عمر خمسطعش. فالأهل لازم يفكروا إذا ممكن يخلوا أطفالهم يحضروا الفيلم.		هاذ يعني انو الفيلم ممكن يكون مش مناسب للصغار تحت الخمسطعش . اذا الوالدين لازم يوخذوا بعين الاعتبار اذا بدهم يخلو ولادهم يتفرجو عالفيلم .	غير	مش	يدعون	يخلوا
15487	corpus-6-test-corpus-26-train	MSA	كيف تريد النقود ؟ من فضلك املأ هذه الورقة ووقع هنا .	كيف بدك مصاري؟ لو سمحت عبي هاي الورقة ووقع هون.	كيف بدك مصاري؟ لو سمحت عبي هاي الورقة ووقع هون.		شلون بدك المصاري؟ لو سمحت، عبي هالورقة ووقع هون.	املأ	عبي	نقود	مصاري
15509	corpus-6-test-corpus-26-train	MSA	تؤلمني معدتي أحياناً .	أحياناً معدتي بتوجعني.	أحياناً معدتي بتوجعني.		بتوجعني معدتي مرات.	أحياناً	مرات	تؤلمني	بتوجعني
15522	corpus-6-test-corpus-26-train	MSA	هل لديكم أطباق ذات سعرات حرارية منخفضة ؟ فأنا أتبع نظاما غذائياً حالياً .	عندك وجبات فيها سعرات حرارية قليلة؟ أنا عامل رجيم، هلأ.	عندك وجبات فيها سعرات حرارية قليلة؟ أنا عامل رجيم، هلأ.		عندكو وجبات قليلة الكالوريز ؟ أنا ماشية بدايت هالأيام.	أطباق	وجبات	منخفضة	قليلة	نظام غذائي : دايت
15529	corpus-6-test-corpus-26-dev	MSA	لا يوجد رسم ضروري .	ما في داعي للرسوم.	ما في داعي للرسوم.		مش موجود رسم ظروري.	ضروري	ظروري
15539	corpus-6-test-corpus-26-train	MSA	أجل ، معي تذكرتان ل " العمالقة " و " المحتالين " .	اه، عندي بطاقتين للعمالقة والمتهربين.	اه، عندي بطاقتين للعمالقة والمتهربين.		أيوة ، معي تذكرتين لـ "العمالقة" و "المحتالين".	أجل	أيوه
15546	corpus-6-test-corpus-26-train	MSA	نحن من أكبر موردي أجهزة الميكروكومبيوتر .	إحنا واحد من أكبر الموردين للكمبيوترات الصغيرة.	إحنا واحد من أكبر الموردين للكمبيوترات الصغيرة.		إحنا من أكبر موردين لأجهزة الميكرو كمبيوتر .	نحن	إحنا	موردي	موردين
15553	corpus-6-test-corpus-26-train	MSA	شكراً . وأنا أيضاً . إلى اللقاء فيما بعد .	شكرا إلك. و أنا كمان. مع- السلامة لوقت تاني.	شكرا إلك. و أنا كمان. مع- السلامة لوقت تاني.		مشكور. وأنا كمان. بشوفك بعدين.	أيضاً	كمان	ألقاك	بشوفك
15564	corpus-6-test-corpus-26-train	MSA	حجرة مزدوجة بحمام من فضلك .	غرفة مزدوجة بحمام، لو سمحت.	غرفة مزدوجة بحمام، لو سمحت.		غرفة مزوجة مع حمام لو سمحت.	مزدوجة	مزوجة	حجرة	غرفة
15566	corpus-6-test-corpus-26-train	MSA	لقد سقطت من على درجات السلم .	وقعت عن الدرجات.	وقعت عن الدرجات.		وقعت من على درج السلم	سقطت	وقعت
15575	corpus-6-test-corpus-26-train	MSA	ما هو الآيس كريم الذي تزكيه ؟	إيش البوظة اللي بتنصحني فيها؟	إيش البوظة اللي بتنصحني فيها؟		شو الأيس كريم اللي بتنصح فيه؟	تزكي	تنصح
15577	corpus-6-test-corpus-26-dev	MSA	هه . هذه . يبدو اللون جميلاً عليك .	ممم. هاد. اللون شكله حلو عليك.	ممم. هاد. اللون شكله حلو عليك.		هه. هاي. شكل اللون حلو عليك كثير.	يبدو	شكل
15598	corpus-6-test-corpus-26-test	MSA	أين كتب اللغة الأجنبية ؟	وين كتب اللغات الأجنبية؟	وين كتب اللغات الأجنبية؟		وين الكتب الأجنبية؟	أين	وين
15604	corpus-6-test-corpus-26-train	MSA	شريحتين وزجاجة سبرايت .	قطعتين وسبرايت.	قطعتين وسبرايت.		قطعتين وقنينة سبرايت .	شريحتين	قطعتين	زجاجة	قنينة
15607	corpus-6-test-corpus-26-test	MSA	أعطني سجائر .	أعطيني سيجاير.	أعطيني سيجاير.		أعطيني دخان.	أعطني	أعطيني
15610	corpus-6-test-corpus-26-dev	MSA	دخوله البلد مخالف للقانون . آسف . حسناً , إنني أخمن في كيفية العناية بكل شيء .	مش قانوني إنه يدخل على البلد - آسف. طيب، أنا بتوقع كيف بدي ازبط كل شي.	مش قانوني إنه يدخل على البلد - آسف. طيب، أنا بتوقع كيف بدي ازبط كل شي.		فوته على البلد مش قانونية. آسف. ماشي، انا بفكر كيف بدي أهتم بكل اشي.	دخوله	فوته	أخمن	بفكر
15652	corpus-6-test-corpus-26-train	MSA	أجل ، أنا . لقد كانوا يعيشون بجواري في كاليفورنيا لكنهم انتقلوا إلى فلوريدا منذ عامين . ماذا عنك ؟ هل تسافر بمفردك ؟	اه، أنا. عاشوا قريب مني بكلفورنيا بس رحلوا قبل سنتين. شو بالنسبة إلك؟ إنت بتسافر لحالك؟	اه، أنا. عاشوا قريب مني بكلفورنيا بس رحلوا قبل سنتين. شو بالنسبة إلك؟ إنت بتسافر لحالك؟		أيوه، أنا. كانوا عايشين بحدي بكاليفورنيا بس انتقلوا على فلوريدا من سنتين. شو بالنسبة الك؟ بتسافر لحالك؟	بجواري	بحدي	لكن	بس
15664	corpus-6-test-corpus-26-train	MSA	أنا مريض .	أنا مريض.	أنا مريض.		أنا مريض.
15666	corpus-6-test-corpus-26-train	MSA	يبدو طفلي منهكاً بسبب الحمى .	إبني مبين عليه التعب عشان الحرارة.	إبني مبين عليه التعب عشان الحرارة.		على ما يبدو ابني تعبان من الحرارة.	حمى	حرارة	منهك	تعبان
15673	corpus-6-test-corpus-26-train	MSA	بهذا المقاس من فضلك .	بهاد المقاس، لو سمحت.	بهاد المقاس، لو سمحت.		بهالمقاس لو سمحت.
15674	corpus-6-test-corpus-26-train	MSA	تمنح أوسمة الاستحقاق الثقافي للفنانين والعلماء المتميزين في هذا اليوم .	تعطى هاي الاوسمة للبستحقها من الفنانين والعلماء المميزين بهاد اليوم.	تعطى هاي الاوسمة للبستحقها من الفنانين والعلماء المميزين بهاد اليوم.		بعطوا وسام الاستحقاق الثقافي للفنانين والعلماء المتميزين اليوم.	تمنح	بعطوا
15676	corpus-6-test-corpus-26-train	MSA	أنا ياباني .	أنا ياباني.	أنا ياباني.		أني ياباني.
15692	corpus-6-test-corpus-26-train	MSA	هذا ثمنه مرتفع جداً .	هيك كتير غالي.	هيك كتير غالي.		هاذ سعره غالي كتير.	ثمنه	سعره
15699	corpus-6-test-corpus-26-train	MSA	أجل . استقل الحافلة التي تذهب إلى محطة كيوتو .	اه. خد باص بروح على كيوتو.	اه. خد باص بروح على كيوتو.		أها، اركب الباص اللي بيروح على محطة كيوتو.	استقل	اركب
15710	corpus-6-test-corpus-26-train	MSA	هل هذا للأعضاء فقط ؟	هاد بس للأعضاء؟	هاد بس للأعضاء؟		هاظا للأعضاء بس ؟	هذا	هاظا
15735	corpus-6-test-corpus-26-dev	MSA	سعر الغرفة هو ستة آلاف ين في الليلة .	سعر الغرفة ست الآف ين بالليلة.	سعر الغرفة ست الآف ين بالليلة.		سعر الغرفة ست آلاف ين لليلة.
15763	corpus-6-test-corpus-26-train	MSA	هل يمكنني أن أحضر هذا على متن الطائرة ؟	ممكن أجيب هاد جوا الطيارة؟	ممكن أجيب هاد جوا الطيارة؟		بقدر أجيب هاذ معي عالطيارة؟	أحضر	أجيب
15775	corpus-6-test-corpus-26-train	MSA	حسناً . كل ما أريده هو معرفة إذا ما كان المشروع سيحقق ربحاً .	طيب، أنا كل اللي بدي أعرفة إذا الشغل راح يجيبلنا ربح.	طيب، أنا كل اللي بدي أعرفة إذا الشغل راح يجيبلنا ربح.		ماشي. كل اللي بدي اياه هو أعرف إذا كان المشروع رح يجيب ربح.	يحقق	يجيب
15784	corpus-6-test-corpus-26-train	MSA	جميل . هل تريدين إيشارباً يتناسب مع هذا ؟	حلو. بتحب أعطيك شال يمشي مع هاد؟	حلو. بتحب أعطيك شال يمشي مع هاد؟		حلو. بدك شال بلبق مع هاذ؟	يتناسب	بلبق	إيشارب	شال
15788	corpus-6-test-corpus-26-train	MSA	أعد شحن البطارية من فضلك .	عيد شحن البطارية، لو سمحت.	عيد شحن البطارية، لو سمحت.		عيد شحن البطارية من فضلك .	أعد	عيد
15791	corpus-6-test-corpus-26-train	MSA	أنا مستعد للطلب .	أنا جاهز عشان أطلب.	أنا جاهز عشان أطلب.		أنا جاهز للطلب.	مستعد	جاهز
15798	corpus-6-test-corpus-26-dev	MSA	أملاح الحمام العشبي تجعل ملمس بشرتك ناعماً وأملس .	املاح الحمام العشبي بخلي ملمس بشرتك ناعم واملس.	املاح الحمام العشبي بخلي ملمس بشرتك ناعم واملس.		أملاح حمام الأعشاب بتخلي بشرتك ناعمة وملسه .	أملس	ملسة	تجعل	بتخلي
15804	corpus-6-test-corpus-26-train	MSA	اكتب اسم شركة الطيران ورقم الرحلة أيضاً .	اكتب إسم شركة الطيران ورقم الرحلة، كمان.	اكتب إسم شركة الطيران ورقم الرحلة، كمان.		اكتب اسم شركة الطيران ورقم الرحلة برضه.	أيضاً	برضه
15814	corpus-6-test-corpus-26-train	MSA	حقاً . اليوم هو الأحد ، والأحد هو أسوء الأيام .	فعلاً. اليوم الأحد، والأحد اسوأ يوم.	فعلاً. اليوم الأحد، والأحد اسوأ يوم.		فعلاً. اليوم الأحد، والأحد أسوأ الأيام.	حقاً	فعلاً
15896	corpus-6-test-corpus-26-train	MSA	أجل . إنها مشكلة تخلص من الفضلات .	صح، هاي المشكلة بتخلصنا من الزبالة.	صح، هاي المشكلة بتخلصنا من الزبالة.		أيوة. هاي مشكلة كب الزبالة.	فضلات	زبالة	تخلص	كب
15897	corpus-6-test-corpus-26-train	MSA	أريد هذا الطراز لخمسة أماكن مرصعة .	بدي هاد الشكل احطهم بخمس أماكن مرصعة.	بدي هاد الشكل احطهم بخمس أماكن مرصعة.		بدي هاي النوعية لخمس أماكن مرصعة.	طراز	نوعية
15899	corpus-6-test-corpus-26-train	MSA	لدي معظم العائلات مصدرين للدخل .	كتير عائلات عندهم أكتر من دخل.	كتير عائلات عندهم أكتر من دخل.		أغلب العيل عندهم مصدرين للدخل.	عائلات	عيل	معظم	أغلب
15902	corpus-6-test-corpus-26-train	MSA	آه . هذه الفضية نادرة " القمر والجرس " . هل تريد أن تغيرها أكيد ؟	أوه. هاي الفضي تحفة "القمر والجرس". متأكد إنه بدك تبدلها؟	أوه. هاي الفضي تحفة "القمر والجرس". متأكد إنه بدك تبدلها؟		اه . هاي القضية نادرة " القمر والجرس " . بدك تغيرها متأكد ؟	هذه	هاي
15911	corpus-6-test-corpus-26-train	MSA	أمي وأختي قادمتان من اليابان لرؤيتي . سيصلان هنا حوالي السابعة مساءً .	إمي وأختي جايين من اليابان عشان يشوفوني. راح يوصلوا هون حوالي الساعة سبعة المسا.	إمي وأختي جايين من اليابان عشان يشوفوني. راح يوصلوا هون حوالي الساعة سبعة المسا.		أمي وأختي جايات من اليابان عشان يشوفوني. رح يصلن حوالي الساعة سبعة المسا.	قادمتان	جايات	مساء	مسا
15942	corpus-6-test-corpus-26-train	MSA	اللون البني محبب هذا العام .	اللون البني منتشر هاي السنة.	اللون البني منتشر هاي السنة.		اللون البني مرغوب هالسنة.	محبب	مرغوب
15950	corpus-6-test-corpus-26-test	MSA	فكرة صائبة . متى تخطط للمجيء ؟	فكرة حلوة. متى مخطط تيجي؟	فكرة حلوة. متى مخطط تيجي؟		فكرة صحيحة. متى بتنوي تيجي؟	تخطط	تنوي	صائبة	صحيحة
15967	corpus-6-test-corpus-26-train	MSA	حسنا . مقعدان من فضلك .	تمام. مقعدين، لو سمحت.	تمام. مقعدين، لو سمحت.		ماشي. كرسيين لو سمحت.	مقعدان	كرسيين
15989	corpus-6-test-corpus-26-train	MSA	أين السوق ؟	وين الدكانة؟	وين الدكانة؟		وين السوق؟
16007	corpus-6-test-corpus-26-train	MSA	أود قياس بذلة السباق الخاصة بي .	بدي أجرب بدلتي السباق الجديدة.	بدي أجرب بدلتي السباق الجديدة.		بدي اقيس بدلة السباق تبعتي.	بذلة	بدلة
16016	corpus-6-test-corpus-26-train	MSA	ظننت أنكم أيها الشباب تأكلون الكعك المخبوز فقط .	كل بالي انكم يا شباب بتاكلوا بس الكعك المخبوز بس..	كل بالي انكم يا شباب بتاكلوا بس الكعك المخبوز بس..		فكرت إنكو يا شباب بتوكلوا الكعك المخبوز بس.	ظننت	فكرت
16034	corpus-6-test-corpus-26-train	MSA	ما سعر تذكرة درجة أولى إلى إدنبره , من فضلك ؟	كم بتكلف تذكرة درجة أولى على إدنبره ، لو سمحت؟	كم بتكلف تذكرة درجة أولى على إدنبره ، لو سمحت؟		كم سعر تذكرة درجة أولى لإدنبره , إذا تكرمت.
16042	corpus-6-test-corpus-26-train	MSA	يبدو أن النقود التي أعطيتني إياها ناقصة عشر دولارات .	شكله الفلوس اللي أعطيتني إياهم ناقصات عشرة دولار.	شكله الفلوس اللي أعطيتني إياهم ناقصات عشرة دولار.		شكله المصاري اللي إنطيتني اياها ناقصة عشر دولارات.	أعطيتني	إنطيتني
16046	corpus-6-test-corpus-26-train	MSA	لقد اتصلت بالسيد سميث في غرفة رقم اثنان صفر واحد منذ لحظات ، لكن لم يرد أحد . هل لك أن ترى هل لا يزال يقيم هنا ؟	رنيت هلا على الأستاذ سميث بعرفة رقم اتنين صفر واحد، بس ما كان في جواب. ممكن تشوفلي إذا هو لسا قاعد هون؟	رنيت هلا على الأستاذ سميث بعرفة رقم اتنين صفر واحد، بس ما كان في جواب. ممكن تشوفلي إذا هو لسا قاعد هون؟		رنيت عالسيد سميث بالغرفة اللي رقمها 201 قبل شوي ، بس ما حدا رد. بتقدر تشوف اذا بعدو قاعد هون؟	اتصلت	رنيت	لحظات	شوي
16061	corpus-6-test-corpus-26-train	MSA	أريد واحدة حديثة .	بدي واحد حديث.	بدي واحد حديث.		بدي وحدة جديدة.	حديثة	جديدة	واحدة	وحدة
16070	corpus-6-test-corpus-26-train	MSA	أعمل في شركة نشر .	أنا بشتغل بشركة نشر.	أنا بشتغل بشركة نشر.		بشتغل بشركة نشر.	أعمل	بشتغل
16073	corpus-6-test-corpus-26-train	MSA	هل لك أن تتفضل وتملأ هذه ؟	ممكن لو سمحت تعبيلي هاد؟	ممكن لو سمحت تعبيلي هاد؟		بتقدر تتكرم و تعبي هاي؟	تتفضل	تتكرم	تملأ	تعبي
16080	corpus-6-test-corpus-26-test	MSA	ما هذا الشارع ؟	شو هاد الشارع؟	شو هاد الشارع؟		شو هاظ الشارع؟	ما	شو
16082	corpus-6-test-corpus-26-test	MSA	هل لك أن تزن هذا الطرد ؟	ممكن توزنلي الطرد؟	ممكن توزنلي الطرد؟		بتقدر توزن هالطرد؟	تزن	توزن
16089	corpus-6-test-corpus-26-train	MSA	ماذا تسمون هذا بالإنجليزية ؟	شو بتسموا هاد بالإنجليزي؟	شو بتسموا هاد بالإنجليزي؟		شو بتسموه هاذ بالإنجليزي؟	ماذا	شو
16091	corpus-6-test-corpus-26-train	MSA	ظل سائراً عبر هذا الممر , وستجدها على الجانب الأيمن .	ضلك ماشي في هاد الممر، بعدين راح تلاقيه على جهة اليمين.	ضلك ماشي في هاد الممر، بعدين راح تلاقيه على جهة اليمين.		ظل ماشي بالممر هاذ , و رح تلاقيها عالجهة اليمين.	أيمن	يمين	سائر	ماشي
16098	corpus-6-test-corpus-26-train	MSA	أريد التأمين على هذا .	بدي اأمن هاد.	بدي اأمن هاد.		بدي أمّن على هاذ.
16106	corpus-6-test-corpus-26-train	MSA	صباح الخير . هذا مكتب الاستقبال . هل لي أن أساعدك ؟	صباح الخير. هون الإستقبال. بقدر أساعدك؟	صباح الخير. هون الإستقبال. بقدر أساعدك؟		صباح الخير. هاذ مكتب الاستقبال.كيف بقدر أساعدك؟
16127	corpus-6-test-corpus-26-train	MSA	حسناً . تفضل بالدخول .	تمام.تفضل إدخل.	تمام.تفضل إدخل.		ماشي. تعال فوت.	ادخل	فوت
16130	corpus-6-test-corpus-26-test	MSA	أجل , سيدي . آتي هنا للإفطار كل يوم , من الاثنين حتى الجمعة , قبل الذهاب للعمل .	صح، أستاذ. أنا باجي هون عشان الفطور كل يوم، من الإثنين للجمعة، قبا ما أروح على الشغل.	صح، أستاذ. أنا باجي هون عشان الفطور كل يوم، من الإثنين للجمعة، قبا ما أروح على الشغل.		أكيد, يا سيدي. بآجي هون عشان الفطور كل يوم, من الاثنين للجمعة، قبل ما أروح على الشغل.	آتي	بآجي	إفطار	فطور
16140	corpus-6-test-corpus-26-dev	MSA	لا توجد أية مشاكل .	ما في اي مشكلة.	ما في اي مشكلة.		ما في أي مشاكل.	توجد	في	أية	أي
16141	corpus-6-test-corpus-26-train	MSA	من فضلك اتصل لي برقم ثلاثة اثنان ستة اثنان تسعة واحد ثمانية .	لو سمحت اتصلي بتلاتة اتنين ستة تنين تسعة واحد تمنية.	لو سمحت اتصلي بتلاتة اتنين ستة تنين تسعة واحد تمنية.		لو سمحت، رنلي على الرقم ثلاثة اثنين ستة اثنين تسعة واحد ثمانية.	اتصل	رن
16158	corpus-6-test-corpus-26-train	MSA	أجل , يمكننا القيام بخدمتك بداية من السابعة .	اه، بنقدر نخدمك من الساعة سبعة.	اه، بنقدر نخدمك من الساعة سبعة.		اها، منقدر نخدمك من الساعة السابعة.	أجل	اها
16167	corpus-6-test-corpus-26-train	MSA	من فضلك استلق هنا .	لو سمحت تمدد هون.	لو سمحت تمدد هون.		لو سمحت، اتمدد هون.	استلق	اتمدد
16169	corpus-6-test-corpus-26-test	MSA	يالها من خدمة سريعة !	شو هالخدمة السريعة.	شو هالخدمة السريعة.		شو هاي الخدمة السريعة!
16191	corpus-6-test-corpus-26-train	MSA	ربما ستظل ترتفع .	ممكن تظل ترتفع.	ممكن تظل ترتفع.		يمكن تظل تطلع.	ترتفع	تطلع
16217	corpus-6-test-corpus-26-train	MSA	من فضلك اتجه يساراً عند التقاطع التالي .	لو سمحت لف على الشمال من التقاطع الجاي.	لو سمحت لف على الشمال من التقاطع الجاي.		لو سمحت روح عاليسار بالتقاطع الجاي.	التالي	الجاي	اتجه	روح
16219	corpus-6-test-corpus-26-dev	MSA	معذرة . كيف يمكنني الوصول إلى المصرف ؟	عفواً. كيف بقدر أوصل لعند البنك؟	عفواً. كيف بقدر أوصل لعند البنك؟		معلش، كيف بقدر أوصل للبنك؟
16222	corpus-6-test-corpus-26-train	MSA	هل توجد خدمة نقل بالحافلات إلى متحف فورد ؟	في خدمة باص لمعرض الفورد؟	في خدمة باص لمعرض الفورد؟		في خدمة باصات بتروح على متحف فورد؟	تنقل	بتودي
16227	corpus-6-test-corpus-26-train	MSA	أجل . اسمك ورقم غرفتك , من فضلك .	تمام. اسمك ورقم غرفتك، لو سمحت.	تمام. اسمك ورقم غرفتك، لو سمحت.		نعم. اسمك ورقم غرفتك , لو سمحت .	أجل	نعم
16231	corpus-6-test-corpus-26-train	MSA	كم المدة التي يستغرقه لكي يصل لليابان عن طريق البريد الجوي ؟	قديش بده وقت عشان يوصل اليابان عن طريق البريد الجوي؟	قديش بده وقت عشان يوصل اليابان عن طريق البريد الجوي؟		قديش بده وقت لحتى يوصل لليابان عن طريق البريد الجوي؟	يستغرق	بده	مدة	وقت
16238	corpus-6-test-corpus-26-train	MSA	حسناً . أراك الساعة الثانية يوم الأحد .	طيب. بشوفك يوم الأحد الساعة تنتين.	طيب. بشوفك يوم الأحد الساعة تنتين.		تمام . بشوفك الساعة ثنتين يوم الأحد.	حسناً	تمام	أراك	بشوفك
16258	corpus-6-test-corpus-26-train	MSA	أريد أن أمر بنيويورك في طريقي إلى تورونتو .	بديي امر من نيويورك على تورونتو.	بديي امر من نيويورك على تورونتو.		بدي امر على نيويورك بطريقي لتورونتو.
16259	corpus-6-test-corpus-26-train	MSA	لقد كسر الزمام المنزلق . هل لديك مزيد من نفس النوع ؟	سحاب البنطلون إنخلغ. عندك كمان منه نفسه؟	سحاب البنطلون إنخلغ. عندك كمان منه نفسه؟		انكسر السحاب اللي عندي. عندك زيادة من نفس النوع ؟	مزيد	زيادة	زمام	سحاب
16271	corpus-6-test-corpus-26-train	MSA	هذا ضرب من الدناءة .	هاد نوع من الوساخة.	هاد نوع من الوساخة.		هاظا ضرب من الوساخة.	دناءة	وساخة
16279	corpus-6-test-corpus-26-dev	MSA	هل لك أن تعيد تأكيد رحلتي ؟ هاهي تذكرة الطيران .	ممكن ترجع تأكد رحلتي الطيران؟ هي تذكرتي الطيران.	ممكن ترجع تأكد رحلتي الطيران؟ هي تذكرتي الطيران.		ممكن تأكدلي الرحلة مرة تانية؟ هاي تذكرة الطيران.
16291	corpus-6-test-corpus-26-train	MSA	هل لديك هذا باللون الأخضر الداكن ؟	عندك من هاد بللون اخضر غامق؟	عندك من هاد بللون اخضر غامق؟		عندك هاذ باللون الاخضر الغامق؟	داكن	غامق
16292	corpus-6-test-corpus-26-test	MSA	هل لك أن تأخذني إلى كانتربري وتعيدني إلى هنا ؟	ممكن تاخدني على الكانتربيري وترجعني؟	ممكن تاخدني على الكانتربيري وترجعني؟		ممكن توديني على كانتربري وترجعني هون؟	تعيدني	ترجعني	تأخذني	توديني
16311	corpus-6-test-corpus-26-train	MSA	هل لي بشوكة أخرى ؟	ممكن تعطيني شوكة تانية؟	ممكن تعطيني شوكة تانية؟		بدي شوكة ثانية؟
16312	corpus-6-test-corpus-26-train	MSA	شكراً جزيلاً لعطفك .	شكراً كتير على لطفك.	شكراً كتير على لطفك.		مشكور كثير على طيبتك.	عطفك	طيبتك	جزيلاً	كثير
16335	corpus-6-test-corpus-26-train	MSA	آسف ، نحن لا نبيع تذاكر للمسرح .	آسف، إحنا ما منبيع بطاقات للمسرح.	آسف، إحنا ما منبيع بطاقات للمسرح.		متأسفين، ما بنبيع تذاكر للمسرح.	لا	ما
16337	corpus-6-test-corpus-26-train	MSA	أريد أن أرى هذا .	بدي أشوف هاد.	بدي أشوف هاد.		بدي أشوف هاظا.	أرى	أشوف
16339	corpus-6-test-corpus-26-train	MSA	آه ، هذا جميل . ماذا علي أن أصنع ؟	أووه، هاد حلو. شو لازم أعمل؟	أووه، هاد حلو. شو لازم أعمل؟		آه، هاذ حلو. شو لازم اعمل؟	أصنع	أعمل
16344	corpus-6-test-corpus-26-dev	MSA	أريد مد إقامتي هنا ليومين آخرين .	بدي أمدد قعدتي اقامتي لكمان يومين.	بدي أمدد قعدتي اقامتي لكمان يومين.		بدي أمدد إقامتي هون يومين ثانيات.	آخرين	ثانيات	مد	أمدد
16351	corpus-6-test-corpus-26-train	MSA	من فضلك غير مقعدي .	لو سمحت غير مقعدي.	لو سمحت غير مقعدي.		لو سمحت غير مقعدي.
16365	corpus-6-test-corpus-26-train	MSA	لدينا جمبري رائع جداً اليوم .	عنا جمبري كتير زاكي اليوم.	عنا جمبري كتير زاكي اليوم.		عنا جمبري مميز كثير اليوم.	رائع	مميز	لدينا	عنا
16371	corpus-6-test-corpus-26-train	MSA	إلى أي ساعة متأخرة تظل مفتوحة ؟	لأي وقت بضل فاتح؟	لأي وقت بضل فاتح؟		لأي ساعة بتظل مفتوحة؟	إلى	ل
16395	corpus-6-test-corpus-26-train	MSA	للمدخنين أم لا ؟	للمدخنين ولا لا؟	للمدخنين ولا لا؟		للي بيدخنو ولا لأ؟	أم	ولا
16403	corpus-6-test-corpus-26-train	MSA	إنه غالي جدا بالنسبة لي . ألا يمكنك تخفيض السعر قليلاً ؟	كتير غالي بالنسبة إلي. ما بتقدر تنزلي من سعره شوي؟	كتير غالي بالنسبة إلي. ما بتقدر تنزلي من سعره شوي؟		هاذ غالي كثير علي. ما بتقدر تنزل السعر شوي؟	تخفض	تنزل	قليلاً	شوي
16409	corpus-6-test-corpus-26-dev	MSA	أنا جاهز صباح الأربعاء أو بعد ظهر الجمعة .	أنا فاتح الأربعا الصبح أو الجمعة بعد الظهر.	أنا فاتح الأربعا الصبح أو الجمعة بعد الظهر.		أنا جاهز الأربعا الصبح أو بعد الظهر يوم الجمعة.	صباح	صبح	أربعاء	أربعا
16413	corpus-6-test-corpus-26-train	MSA	لم أقم بالحجز .	ما عملت حجز.	ما عملت حجز.		ما عملت حجز.	أقم	عملت
16434	corpus-6-test-corpus-26-train	MSA	لأن الصيف في اليابان عادة ما يكون شديد الحرارة ، ولم يكن لدينا تكييف هواء قديماً .	لأنه الصيف باليابان عادة كتير حر، وما كان عنا مكيفات زمان.	لأنه الصيف باليابان عادة كتير حر، وما كان عنا مكيفات زمان.		لأنه الصيف باليابان عادة بكون حامي كثير، وما كان عندنا مكيف هوا زمان.	هواء	هوا	حار	حامي
16444	corpus-6-test-corpus-26-train	MSA	هل لك أن تستدعي لي سيارة أجرة الساعة الثامنة صباح غد ؟	ممكن تحكيلي مع تاكسي بكرا الصبح الساعة تمنية؟	ممكن تحكيلي مع تاكسي بكرا الصبح الساعة تمنية؟		ممكن تجيبلي تكسي بكرا الساعة ثمنية الصبح؟	غد	بكرا	تستدعي	تجيب
16453	corpus-6-test-corpus-26-train	MSA	إنه مريب .	اشي بخوف.	اشي بخوف.		هاذ مشكوك فيه.	مريب	مشكوك
16465	corpus-6-test-corpus-26-train	MSA	لماذا لا ننتظر الحافلة تحت التندة ؟	ليش ما نستنى الباص تحت المضلة؟	ليش ما نستنى الباص تحت المضلة؟		ليش ما نستنى الباص تحت المظلة ؟	تندة	مظلة
16477	corpus-6-test-corpus-26-train	MSA	تعالى ، كينجي . دعني أريك أرجاء المكتب .	تعال، كنجي. خليني آخدك لفة بالمكتب.	تعال، كنجي. خليني آخدك لفة بالمكتب.		تعال ، كينجي . خليني أوريك حوالين المكتب .	أريك	أوريك	أرجاء	حوالين
16478	corpus-6-test-corpus-26-train	MSA	أجل ، إنها مفتوحة من التاسعة حتى التاسعة .	اه، مفتوح من التسعة للتسعة.	اه، مفتوح من التسعة للتسعة.		أها ، هي فاتحة من الساعة تسعة للساعة تسعة.	مفتوحة	فاتحة	تاسعة	تسعة
16484	corpus-6-test-corpus-26-dev	MSA	لا أستطيع النوم جيداً أثناء الليل .	مش عم بقدر أنام منيح بالليل.	مش عم بقدر أنام منيح بالليل.		ما قدرت أنام مليح بالليل.	جيد	مليح	أستطيع	قدرت
16487	corpus-6-test-corpus-26-train	MSA	كيف أثر الركود على الشركة ؟	كيف أثر الركود على الشركة ؟	كيف أثر الركود على الشركة ؟		شلون أثر الركود عالشركة ؟	كيف	شلون
16495	corpus-6-test-corpus-26-train	MSA	لدي موعد آخر .	عندي إجتماع تاني.	عندي إجتماع تاني.		عندي موعد ثاني.
16516	corpus-6-test-corpus-26-train	MSA	هل لي بخريطة لطرق المدينة ؟	ممكن اخد خريطة لشوارع المدينة؟	ممكن اخد خريطة لشوارع المدينة؟		ممكن خريطة لطرق المدينة؟
16536	corpus-6-test-corpus-26-dev	MSA	هذا بعينه ما كنت أبحث عنه .	أكتر إشي كنت بدور عليه.	أكتر إشي كنت بدور عليه.		هاي بالزبط اللي كنت بدور عليه.	بالزبط	بعينه	أبحث	بدور
16542	corpus-6-test-corpus-26-train	MSA	لا أفهم شرحك .	مش فاهمة شرحك.	مش فاهمة شرحك.		مش فاهم شرحك.	لا	مش
16546	corpus-6-test-corpus-26-train	MSA	كان يجب تدبير وسيلة مواصلات . ذاهبة إلى بوسطن .	كان لازم تدبر مواصلات . رايحه لبوسطن.	كان لازم تدبر مواصلات . رايحه لبوسطن.		لازم ندبر طريقة أو سيارة رايحة على بوسطن.	ذاهبة	رايحة	يجب	لازم
16547	corpus-6-test-corpus-26-train	MSA	أين أفضل مكان لمشاهدة المعالم ؟	وين أحسن مكان للسياحة؟	وين أحسن مكان للسياحة؟		وين أحسن مكان لشوفة المناظر؟	معالم	مناظر	أفضل	أحسن
16576	corpus-6-test-corpus-26-train	MSA	هل هي متينة ؟	ناصحة؟	ناصحة؟		هي قوية؟	متينة	قوية
16577	corpus-6-test-corpus-26-train	MSA	لقد استمتعت كثيرا .	أنا انبسطت كتير.	أنا انبسطت كتير.		كيفت كثير .	استمتعت	كيفت
16581	corpus-6-test-corpus-26-train	MSA	حسنا إذاً ، أريد عصا مضرب أصغر كتلك التي مع جوليا روبرتس .	طيب إذن، بدي يكون مضؤب أصغر زي يلي مع جوليا روبرتس.	طيب إذن، بدي يكون مضؤب أصغر زي يلي مع جوليا روبرتس.		ماشي يعني، بدي عصاة مضرب اصغر مثل اللي مع جوليا روبرتس.	إذاً	يعني	عصا	عصاة
16586	corpus-6-test-corpus-26-train	MSA	هل لك أن تأخذ هذا ، من فضلك ؟	ممكن تاخد هاد، لو سمحت؟	ممكن تاخد هاد، لو سمحت؟		ممكن توخذ هاذ، لو سمحت؟	تأخذ	توخذ
16601	corpus-6-test-corpus-26-train	MSA	الركاب المسافرون على خطوط إيه بي سي الجوية رحلة رقم سبعة صفر ثلاثة المتجهة إلى طوكيو التفضل بالتوجه إلى بوابة رقم عشرين لإنهاء الإجراءات الرسمية .	المسافرين المغادرين على الخطوط الجوية ايه بي سي رحلة الطيران رقم سبعة صفر تلاتة المتجهة لطوكيو لو سمحتوا إتحركوا للبوابة عشرين للإجراءات الحكومية.	المسافرين المغادرين على الخطوط الجوية ايه بي سي رحلة الطيران رقم سبعة صفر تلاتة المتجهة لطوكيو لو سمحتوا إتحركوا للبوابة عشرين للإجراءات الحكومية.		الركاب المسافرين على خطوط إيه بي سي الجوية رحلة رقم سبعة صفر ثلاثة واللي رايحة على طوكيو الرجاء روحوا على البوابة رقم عشرين عشان تخلصوا الأمور الرسمية.	تنهي	تخلص	التفضل	الرجاء
16607	corpus-6-test-corpus-26-train	MSA	أين موقف الحافلات ل بي ؟	وين موقف باصات ل بي؟	وين موقف باصات ل بي؟		وين مجمع الباصات ل بي ؟	موقف	مجمع
16643	corpus-6-test-corpus-26-train	MSA	الدخول فرداً فردا ، ً من فضلكم .	واحد واحد يدخل، لو سمحت.	واحد واحد يدخل، لو سمحت.		الفوته واحد واحد ، من فظلكو.	فرد	واحد	الدخول	الفوته
16653	corpus-6-test-corpus-26-dev	MSA	من أين يمكنني شراء مفارش مائدة ؟	من وين بقدر أشتري مفرش سفره؟	من وين بقدر أشتري مفرش سفره؟		من وين بقدر اشتري مفارش سفرة؟	مائدة	سفرة
16679	corpus-6-test-corpus-26-train	MSA	هل يمكنني استئجار مرشداً يتحدث اللغة اليابانية ؟	بقدر استئجر دليل سياحي بحكي ياباني؟	بقدر استئجر دليل سياحي بحكي ياباني؟		ممكن أستأجر دليل بسولف ياباني؟	يتحدث	بسولف
16696	corpus-6-test-corpus-26-train	MSA	هل تريدني أن ألتقط لك صورة ؟	بتحب آخدلك صوره؟	بتحب آخدلك صوره؟		بدك ياني اوخذلك صورة؟	ألتقط	أوخذ
16709	corpus-6-test-corpus-26-train	MSA	لم يكن لدي هذا الطبق .	ما كان عندي هاد الصحن.	ما كان عندي هاد الصحن.		ما كان عندي هاظا الصحن.	طبق	صحن	يكن	كان
16718	corpus-6-test-corpus-26-train	MSA	لقد قطع إصبعي . هل يوجد مطهر ؟	انجرح اصبعي. في هون مطهر؟	انجرح اصبعي. في هون مطهر؟		انجرح اصبعي. في سبيرتو؟	قطع	انجرح
16723	corpus-6-test-corpus-26-train	MSA	هل يمكنني الحصول على طابع فئة خمسة وتسعين سنتاً ؟	ممكن آخد طوابع بخمسة وتسعين سنت؟	ممكن آخد طوابع بخمسة وتسعين سنت؟		بتقدر تعطيني طابع بتسعة وتسعين سنتا؟	يمكنك	بتقدر
16736	corpus-6-test-corpus-26-train	MSA	سأكون هنا الساعة الثامنة إلى الربع .	راح أكون هون على التمنية إلا ربع.	راح أكون هون على التمنية إلا ربع.		رح أكون هون الساعة ثمانية إلا ربع.
16746	corpus-6-test-corpus-26-train	MSA	أريد عطراً .	بدي عطر.	بدي عطر.		بدي عطر.
16747	corpus-6-test-corpus-26-train	MSA	هل لي بجدول مواعيد ؟	ممكن آخد جدول المواعيد؟	ممكن آخد جدول المواعيد؟		أعطيني جدول المواعيد؟
16751	corpus-6-test-corpus-26-test	MSA	هل ستذهب إلى المدرسة هنا ؟	راح تروح على المدرسة هون؟	راح تروح على المدرسة هون؟		رح تروح عالمدرسة هون؟	تذهب	تروح
16758	corpus-6-test-corpus-26-dev	MSA	كم كان ثمنها ؟	قديش كان حقها؟	قديش كان حقها؟		قديش كان حقها ؟	ثمنها	حقها
16760	corpus-6-test-corpus-26-train	MSA	هل فندق هيلتون بعيد عن هنا ؟	فندق الهلتون بعيد من هون؟	فندق الهلتون بعيد من هون؟		فندق الهيلتون بعيد من هون؟
16769	corpus-6-test-corpus-26-train	MSA	أنا متأكد أنني وضعتها في محفظة الأوراق الخاصة بي .	أنا متأكد إني حطيته بمحفظتي.	أنا متأكد إني حطيته بمحفظتي.		أنا متأكد إني حطيتها بمحفظة الوراق تاعيتي .	الخاصة بي	تاعيتي	وضعتها	حطيتها
16770	corpus-6-test-corpus-26-train	MSA	ارفعوا أيديكم .	إرفعوا إيديكم.	إرفعوا إيديكم.		ارفعوا إيديكو	يد	إيد
16771	corpus-6-test-corpus-26-train	MSA	هل يوجد مطعماً يمكنك أن تزكيه بالقرب من هنا ؟	في مطعم بتقدر تنصحني فيه قريب من هون؟	في مطعم بتقدر تنصحني فيه قريب من هون؟		في مطعم بتنصح فيه قريب من هون؟	يوجد	في
16773	corpus-6-test-corpus-26-train	MSA	أيهما تفضل , داكن أم فاتح ؟	شو بتحب، غامق وإلا فاتح؟	شو بتحب، غامق وإلا فاتح؟		شو بتحب أكثر, غامق أو فاتح؟	تفضل	بتحب	غامق	داكن
16781	corpus-6-test-corpus-26-train	MSA	هل لك أن تخبرني عن مكان تحليق الطائرة الآن ؟	ممكن تحكيلي الطيارة وين رايحه؟	ممكن تحكيلي الطيارة وين رايحه؟		بتقدر تحكيلي وين بطير الطيارة هسا؟	تحلق	بطير
16793	corpus-6-test-corpus-26-train	MSA	تذكرة نزول وركوب طائرة أخرى من فضلك .	بدي تذكرة نزول و ركوب طيارة تانية لو سمحت.	بدي تذكرة نزول و ركوب طيارة تانية لو سمحت.		تذكرة نزول وطلوع طيارة ثانية لو سمحت.	ركوب	طلوع	طائرة	طيارة
16796	corpus-6-test-corpus-26-train	MSA	أين يوجد مكان لطيف لقضاء نزهة ليوم واحد ؟	وين في مكان حلو لرحلة ليوم واحد؟	وين في مكان حلو لرحلة ليوم واحد؟		وين بلاقي مكان لطيف أظل فيه رحلة ليوم واحد؟	نزهة	رحلة
16799	corpus-6-test-corpus-26-train	MSA	أريد حقيبة كيلي حمراء نفس هذا الطراز .	بدي نفس شنطة كيلي الحمرا نفس هاد الموديل.	بدي نفس شنطة كيلي الحمرا نفس هاد الموديل.		بدي شنتة كيلي حمرا مثل هاذ الموديل.	حمراء	حمرا	نفس	مثل
16805	corpus-6-test-corpus-26-train	MSA	هل ستزال تعمل جدول المواعيد ؟	لسا بدك تعمل جدول مواعيد؟	لسا بدك تعمل جدول مواعيد؟		هل رح تظل جدول المواعيد شغّالة؟	تزال	تظل
16810	corpus-6-test-corpus-26-train	MSA	متى يفتح المصرف ؟	متى البنك بفتح؟	متى البنك بفتح؟		أميت بفتح البنك؟	متى	أميت
16811	corpus-6-test-corpus-26-train	MSA	أشعر بالإعياء .	حاسس إني مريض.	حاسس إني مريض.		بحس بالتعب.	إعياء	تعب
16819	corpus-6-test-corpus-26-train	MSA	سأرتبك . هل تمانع في رسم خريطة لي ؟	رح انعجق. بتمانع ترسملي خريطة؟	رح انعجق. بتمانع ترسملي خريطة؟		رح أرتبك. ما عندك مشكلة ترسملي خريطة؟
16822	corpus-6-test-corpus-26-test	MSA	بالخارج .	برا.	برا.		برا.	خارج	برا
16829	corpus-6-test-corpus-26-test	MSA	خذني إلى المستشفى .	خدني على المستشفى.	خدني على المستشفى.		خذني على المستشفى.
16833	corpus-6-test-corpus-26-train	MSA	هل يجب أن آتي إلى المستشفى كل يوم ؟	ضروري آجي على المستشفى كل يوم؟	ضروري آجي على المستشفى كل يوم؟		لازم آجي على المستشفى كل يوم؟
16837	corpus-6-test-corpus-26-train	MSA	معدتي تؤلمني .	بطني بتوجعني.	بطني بتوجعني.		بطني بوجعني.
16839	corpus-6-test-corpus-26-train	MSA	كم أجرة البريد لإرسال هذا الخطاب إلى اليابان ؟	كم رسوم البريد عشان أبعت هاي الرسالة على اليابان؟	كم رسوم البريد عشان أبعت هاي الرسالة على اليابان؟		قديش بده البريد مصاري عشان أرسل هالرسالة لليابان؟	خطاب	رسالة
16842	corpus-6-test-corpus-26-train	MSA	أريد زجاجة من نبيذ شيري الأسباني .	بدي قنينة وسكي اسباني	بدي قنينة وسكي اسباني		بدي قنينة من الشيري الأسباني.
16869	corpus-6-test-corpus-26-train	MSA	هل تريد أن يأتي أحد ليأخذك من المطار ؟	بدك حد يجي ياخدك من المطار؟	بدك حد يجي ياخدك من المطار؟		بدك حدا يجي يوخذك من المطار؟	أحد	حدا	يأتي	يجي
16872	corpus-6-test-corpus-26-dev	MSA	سيبدأ الصعود على متن الطائرة الساعة الرابعة والنصف لذلك من فضلكم كونوا هناك قبل هذا الموعد .	الصعود للطيارة ببدا على الأربعة ونص فلو سمحتوا كونوا هناك قبل إذا هيك.	الصعود للطيارة ببدا على الأربعة ونص فلو سمحتوا كونوا هناك قبل إذا هيك.		رح يبلش الصعود على الطيارة الساعة أربعة ونص . لذالك لو سمحتو كونو هون قبل هذا الوقت.	يبدأ	يبلش
16878	corpus-6-test-corpus-26-train	MSA	من ثلاثين ألف ين .	من ثلاثين ألف ين .	من ثلاثين ألف ين .		من ثلاثين ألف ين.
16879	corpus-6-test-corpus-26-train	MSA	من أين يمكنني شراء بطاقة هاتف ؟	من وين بقدر أشتري بطاقة تلفون؟	من وين بقدر أشتري بطاقة تلفون؟		من وين بقدر اشتري كرت تلفون؟	بطاقة	كرت			هاتف : تلفون
16888	corpus-6-test-corpus-26-train	MSA	هل يمكنني إعادتها في مدينة مختلفة ؟	بقدر أرجعها من مدينة تانية؟	بقدر أرجعها من مدينة تانية؟		بقدر أرجعها بمدينة ثانية؟	مختلفة	ثانية	أعيدها	أرجعها
16889	corpus-6-test-corpus-26-dev	MSA	أخطط للبقاء لمدة اثنا عشر يوماً .	بخطط إني أضل طنعشر يوم.	بخطط إني أضل طنعشر يوم.		بخطط أظل اثنعشر يوم.	أبقى	أظل
16893	corpus-6-test-corpus-26-train	MSA	من فضلك اجعل الجزء العلوي أطول قليلاً .	لو سمحت خلي من فوق أطول شوي.	لو سمحت خلي من فوق أطول شوي.		من فضلك خلي الجزء الفوقاني أطول شوي.	علوي	فوقاني	اجعل	خلي
16896	corpus-6-test-corpus-26-train	MSA	تحتاج لرؤية أخصائي .	لازم تشوف مختص.	لازم تشوف مختص.		بتحتاج تشوف دكتور متخصص.
16899	corpus-6-test-corpus-26-dev	MSA	بضع دقائق أخرى من فضلك .	شوية وقت، لو سمحت.	شوية وقت، لو سمحت.		كم دقيقة كمان اذا سمحت.	أخرى	كمان
16904	corpus-6-test-corpus-26-train	MSA	مسار رقم أربعة عشر .	تسجيل رقم أربعطعش.	تسجيل رقم أربعطعش.		طريق رقم اربعطش.	أربعة عشر	اربعطعش
16911	corpus-6-test-corpus-26-train	MSA	آه ، عندك ؟ بالتأكيد إن لديك تشكيلة كبيرة .	أووه، إنت بتعمله؟ إنت أكيد عندك خيارات كتيرة.	أووه، إنت بتعمله؟ إنت أكيد عندك خيارات كتيرة.		أها، عندك؟ طبعا إنت عندك تشكيلة كبيرة.	بالتأكيد	طبعاً
16928	corpus-6-test-corpus-26-dev	MSA	لا أستطيع أن أجدها في أي مكان .	ما لاقيهم ولا مكان.	ما لاقيهم ولا مكان.		مش قادر ألاقيها بأي مكان.	أجدها	ألاقيها
16936	corpus-6-test-corpus-26-test	MSA	هل لديك أي مقاعد شاغرة للندن ؟	عندك أي مقعد فاضي على لندن؟	عندك أي مقعد فاضي على لندن؟		عندك اي كراسي فاظية لندن؟	شاغرة	فاظية
16952	corpus-6-test-corpus-26-train	MSA	أريد نسخة من تقرير السرقة .	بدي نسخة عن تقرير السرقة.	بدي نسخة عن تقرير السرقة.		بدي نسخة من تقرير السرقة.
16955	corpus-6-test-corpus-26-dev	MSA	إنها على بعد ناصية واحدة في الشارع .	بعد تقاطع واحد في الشارع.	بعد تقاطع واحد في الشارع.		هيه على بُعد ناصية وحدة بالشارع.	في	ب
16960	corpus-6-test-corpus-26-train	MSA	هل لك أن تعطيني إشارة بالضوء عندما تكون فيها ؟	بتقدر تعطيني ضو طول ما إنت هناك؟	بتقدر تعطيني ضو طول ما إنت هناك؟		بتقدر تعطيني إشارة بالضو لما تكون فيها؟	ضوء	ضو	عندما	لما
16962	corpus-6-test-corpus-26-test	MSA	هل هذه السجائر معتدلة ؟	هدول سيجار خفيفة؟	هدول سيجار خفيفة؟		هاي السقاير معتدلة؟	سجائر	سقاير
16964	corpus-6-test-corpus-26-train	MSA	حسنا . مثل هذه فسحب .	تمام. زي هاي بدي.	تمام. زي هاي بدي.		طيب. زي هاي بس.	فحسب	بس	مثل	زي
16967	corpus-6-test-corpus-26-train	MSA	سيأتي القطار السريع التالي بعد ساعة .	القطارالجاي رح يجي خلال ساعة وحدة.	القطارالجاي رح يجي خلال ساعة وحدة.		راح يجي القطار السريع الجاي بعد ساعة.
16976	corpus-6-test-corpus-26-train	MSA	أود أن أجعل أكمام هذا الجاكت الرياضي طويلة .	بدي تطولي كمام جاكيت الرياضة هاد.	بدي تطولي كمام جاكيت الرياضة هاد.		بدي اعمل اكمام هالجاكيت الرياضي طويلة.	أجعل	أعمل
16992	corpus-6-test-corpus-26-train	MSA	لدي حجز . هذا هو رقم تأكيد الحجز .	عندي حجز. هاد رقم تأكيد الحجز.	عندي حجز. هاد رقم تأكيد الحجز.		عندي حجز. هاظ هو رقم تأكيد الحجز.
17027	corpus-6-test-corpus-26-train	MSA	عيد ميلادك اقترب .	عيد ميلادك قرب.	عيد ميلادك قرب.		عيد ميلادك قرب.	اقترب	قرب
17030	corpus-6-test-corpus-26-dev	MSA	توقفت القطارات بسبب الإضراب .	وقفت القطارات عشان الإضراب.	وقفت القطارات عشان الإضراب.		وقفت القطارات عشان الإضراب.	بسبب	عشان
17038	corpus-6-test-corpus-26-train	MSA	هل يمكنك أن تصلح ذلك ؟	بتقدر تصلح هاد؟	بتقدر تصلح هاد؟		بتقدر تصلح هاي؟
17068	corpus-6-test-corpus-26-dev	MSA	كان الشارع مزدحماً بالسيارات .	الشارع كان فيه أزمة سيارات.	الشارع كان فيه أزمة سيارات.		كان الشارع مليان سيارات.	مزدحم	مليان
17079	corpus-6-test-corpus-26-train	MSA	إنه المبنى الثاني على يسار هذا المبني الأبيض .	هو المبنى التاني على شمال المبنى الأبيض.	هو المبنى التاني على شمال المبنى الأبيض.		البناية الثانية على يسار البناية البيضا.	مبنى	بناية	بيضاء	بيضا
17094	corpus-6-test-corpus-26-train	MSA	حجزنا مقعداً ليوم الخامس والعشرين من أكتوبر في الساعة الحادية عشر صباحاً .	إحنا حجزنا مقعد لخمسة وعشرين أكتوبر الساعة احدعش الصبح.	إحنا حجزنا مقعد لخمسة وعشرين أكتوبر الساعة احدعش الصبح.		حجزنا مقعد لخمسة و عشرين من شهر عشرة الساعة احدعش الصبح.	أكتوبر	عشرة
17097	corpus-6-test-corpus-26-train	MSA	لا . قليلاً في الأمام . هناك ، نعم .	لا، أكتر شوي من قدام. هناك، صح.	لا، أكتر شوي من قدام. هناك، صح.		لا. شوي لقدام. هناك، إيوه.	أمام	قدام
17115	corpus-6-test-corpus-26-train	MSA	نعم ، هذا لا يشمل الوجبات .	صح، هاد ما بشمل الوجبات.	صح، هاد ما بشمل الوجبات.		أيوة، هاذ ما بشمل الأكل.	وجبات	أكل
17117	corpus-6-test-corpus-26-train	MSA	أين يمكنني استعادة ثمن هذه التذكرة ؟	من وين بقدر أسترجع هاي التذكرة؟	من وين بقدر أسترجع هاي التذكرة؟		وين بقدر ارجّع حق هالتذكرة؟	استعيد	ارجّع	ثمن	حق
17120	corpus-6-test-corpus-26-train	MSA	لماذا يحدث هذا ؟	ليش هيك صار؟	ليش هيك صار؟		ليش بصير هاذ ؟	يحدث	بصير	لماذا	ليش
17149	corpus-6-test-corpus-26-train	MSA	أريد أن أحصل على استراحة .	بدي آخد استراحة.	بدي آخد استراحة.		بدي أوخذ بريك.	أحصل	أوخذ
17158	corpus-6-test-corpus-26-train	MSA	لقد تعطلت سيارتي . من فضلك احضر لتأخذها .	سيارتي تعطلت، لو سمحت تعال وخدها.	سيارتي تعطلت، لو سمحت تعال وخدها.		سيارتي خربت. تعال خذها لو سمحت.	تعطلت	خربت	احضر	تعال
17163	corpus-6-test-corpus-26-train	MSA	أريد أن يكون شعري خلف رأسي أطول قليلاً .	بدي شعري من ورا أطول شوي.	بدي شعري من ورا أطول شوي.		بدي شعري يكون طويل شوي ورا راسي.	خلف	ورا	رأسي	راسي
17177	corpus-6-test-corpus-26-train	MSA	ما هي الأنواع التي لديكم ؟	شو الاصناف يلي عندكم؟	شو الاصناف يلي عندكم؟		شو الأنواع اللي عندكم؟
17179	corpus-6-test-corpus-26-dev	MSA	أوافق . إنه أحد الأماكن المفضلة لي .	أنا موافق. هاد واحد من الأماكن المفضلة عندي.	أنا موافق. هاد واحد من الأماكن المفضلة عندي.		موافق. هاذ واحد من احلا الاماكن عندي.	مفضلة	أحسن	أوافق	موافق
17180	corpus-6-test-corpus-26-train	MSA	ما هو نوع النموذج الذي تفكر فيه ؟	شو نوع الموديل اللي حاطته ببالك؟	شو نوع الموديل اللي حاطته ببالك؟		شو نوع النموذج اللي بتفكر فيه؟	ما	شو
17204	corpus-6-test-corpus-26-test	MSA	اسمي ميتشكو تاناكا ، ورقم الرحلة إلى طوكيو هو خمسة ، صفر ، واحد .	إسمي ميتشيكو تاناكا، ورحلة الطيران رقمها خمسة صفر واحد لطوكيو.	إسمي ميتشيكو تاناكا، ورحلة الطيران رقمها خمسة صفر واحد لطوكيو.		اسمي ميتشكو تاناكا، ورقم الرحلة لطوكيو هو خمسة، صفر، واحد.
17216	corpus-6-test-corpus-26-train	MSA	من فضلك ، هل رسمت لي خريطة بسيطة من هنا ؟	بتقدر لو سمحت ترسملي خريطة مبسطة من هون؟	بتقدر لو سمحت ترسملي خريطة مبسطة من هون؟		من فضلك، بتقدر ترسملي خريطة سهلة من هون؟	بسيطة	سهلة
17217	corpus-6-test-corpus-26-train	MSA	أين نتقابل ؟	وين راح نلتقي؟	وين راح نلتقي؟		وين بدنا نتلاقى؟	نتقابل	نتلاقى
17222	corpus-6-test-corpus-26-train	MSA	أود تصفيف شعري بالطريقة التي كان عليها من قبل .	بدي شكل شعري يضل زي ما كان.	بدي شكل شعري يضل زي ما كان.		بدي أعمل شعري زي ما كان قبل.	أصفف	أعمل
17229	corpus-6-test-corpus-26-train	MSA	أعطني خمسين ، من فضلك .	اعطيني خمسين، لو سمحت.	اعطيني خمسين، لو سمحت.		اعطيني خمسين ، إذا سمحت.
17272	corpus-6-test-corpus-26-train	MSA	أين يمكنني أن أقوم بإجراءات الدخول للخطوط الجوية اليابانية ؟	وين بقدر أشيك حجزي مع الخطوط الجوية اليابانية؟	وين بقدر أشيك حجزي مع الخطوط الجوية اليابانية؟		وين بقدر أعمل إجراءات الدخول للخطوط الجوية اليابانية ؟	أقوم	أعمل
17280	corpus-6-test-corpus-26-train	MSA	ما هي المحتويات ؟	شو هيه المحتويات؟	شو هيه المحتويات؟		شو المكونات؟	محتويات	مكونات
17295	corpus-6-test-corpus-26-train	MSA	هل هناك أي أماكن في المنطقة تلقي تزكية كثيرة ؟	وين في أماكن بالمنطقة تكون كتير مرتبه؟	وين في أماكن بالمنطقة تكون كتير مرتبه؟		في أماكن بالمنطقة بتجيب تزكية كثيرة؟	تلقى	بتجيب
17311	corpus-6-test-corpus-26-train	MSA	من فضلك أعطني بعض الفكة .	لو سمحت أعطيني شوية فراطة.	لو سمحت أعطيني شوية فراطة.		لو سمحت اعطيني شوية فراطة.	شوي	بعض	فكة	فراطة
17313	corpus-6-test-corpus-26-train	MSA	حسناً . سأتأكد أن حقائبك ستكون هنا .	تمام، أنا راح اتأكد إنه شنطك راح يكونوا هون.	تمام، أنا راح اتأكد إنه شنطك راح يكونوا هون.		طيب . راح أتأكد إنه الشناتي رح تكون هون.	حقائب	شناتي
17315	corpus-6-test-corpus-26-train	MSA	هذا هو طبقنا المميز , سمك موسى المشوي الخاص بدوفر .	هاد اختصاصنا، سمك موسى الدوفر المشوي.	هاد اختصاصنا، سمك موسى الدوفر المشوي.		هاذ طبقنا الخاص, سمك موسى المشوي الخاص بدوفر.	المميز	الخاص
17339	corpus-6-test-corpus-26-train	MSA	سنمكث .	راح نقعد.	راح نقعد.		راح نظل.	نمكث	نظل
17350	corpus-6-test-corpus-26-train	MSA	لقد تعرضت لعملية سلب .	أنا انسرقت.	أنا انسرقت.		انسرقت .	سلب	سرقة
17356	corpus-6-test-corpus-26-train	MSA	حسناً . هل يجب أن أقوم بتركيزها ؟	تمام. لازم أركز عليه؟	تمام. لازم أركز عليه؟		ماشي. لازم أساويها مركزة؟	أقوم	أساويها
17381	corpus-6-test-corpus-26-dev	MSA	سنتقاسم .	راح نتشارك.	راح نتشارك.		رح نتقاسم.
17394	corpus-6-test-corpus-26-train	MSA	لا يوجد لدينا نفس الطراز الآن . سأفحص مخزوننا . انتظر دقيقة من فضلك .	ما عنا هلأ نفس هاد الموديل. راح أشيك المخزن. استنى دقيقة، لو سمحت.	ما عنا هلأ نفس هاد الموديل. راح أشيك المخزن. استنى دقيقة، لو سمحت.		ما عنا نفس النوع حالياً. رح أشوف المخزن عنا. استنى دقيقة إذا سمحت.	أفحص	أشوف	مخزون	مخزن
17398	corpus-6-test-corpus-26-train	MSA	ويسكي اسكتلندي وماء من فضلك .	سكوتش مع مي، لو سمحت.	سكوتش مع مي، لو سمحت.		ويسكي اسكتلاندي ومية لو سمحت.	ماء	مية
17399	corpus-6-test-corpus-26-train	MSA	هذا يبدو رائعاً . ما الثمن ؟	مبين إنه ممتع. قديش حقه؟	مبين إنه ممتع. قديش حقه؟		هاذ مبين بجنن. كم سعره ؟	رائعاً	بجنن	ثمن	سعر
17414	corpus-6-test-corpus-26-train	MSA	خذ هذه التذكرة الطبية إلى الصيدلية . يمكنك الحصول على الدواء من هناك .	خد هاي الوصفة الطبية على الصيدلية. راح تلاقي الدوا هناك.	خد هاي الوصفة الطبية على الصيدلية. راح تلاقي الدوا هناك.		خذ هالوصفة الطبية للصيدلية. بتقدر توخد الدوا من هنيك.	دواء	دوا	تذكرة	وصفة
17438	corpus-6-test-corpus-26-train	MSA	لقد طلبت ذلك .	أنا طلبت هاد.	أنا طلبت هاد.		طلبت هاظ.	ذلك	هاظ
17453	corpus-6-test-corpus-26-train	MSA	نعم , يمكنك أن تتوقف في أي محطة ما بين هنا وشيكاغو .	اه، بتقدر توقف هناك عند أي محطة بين هون وتشيكاغو.	اه، بتقدر توقف هناك عند أي محطة بين هون وتشيكاغو.		أيوة, بتقدر توقف بأي محطة مابين هون وشيكاغو.	تتوقف	توقف
17460	corpus-6-test-corpus-26-train	MSA	من أين يمكنني شراء بعض الهدايا التذكارية ؟	من وين بقدر أشتري هدايا تذكارية؟	من وين بقدر أشتري هدايا تذكارية؟		منين بقدر أشتري شوية هدايا تذكارية ؟	من أين	منين	بعض	شوية
17475	corpus-6-test-corpus-26-train	MSA	إنها غالية الثمن . لا أستطيع شرائها .	هاد كتير غالي. أنا ما بقدر أشتريه.	هاد كتير غالي. أنا ما بقدر أشتريه.		هي غالية كثير . ما بقدر عمشتراها	شرائها	مشتراها
17482	corpus-6-test-corpus-26-train	MSA	هل يمكنني أن أحصل على رقم تليفون إيه بي سي والشركة في شيكاغو من فضلك ؟	بقدر آخد رقم إيه بي سي آند كومباني في شيكاغو، لو سمحت.	بقدر آخد رقم إيه بي سي آند كومباني في شيكاغو، لو سمحت.		بقدر آخذ رقم تليفون إيه بي سي والشركة في شيكاغو لو سمحت؟
17488	corpus-6-test-corpus-26-test	MSA	أين الكاتدرائية ؟	وين الكنيسة؟	وين الكنيسة؟		وين الكنيسة الكبيرة؟
17496	corpus-6-test-corpus-26-train	MSA	كيف تحب أن تأكل البيض ؟	كيف بتحب تاكل البيض؟	كيف بتحب تاكل البيض؟		كيف بتحب توكل البيض؟	تأكل	توكل
17504	corpus-6-test-corpus-26-train	MSA	يوجد بجانب هذا المبني تحديداً .	هيو على اليمين جنب هاي البناية.	هيو على اليمين جنب هاي البناية.		هو جنب هاذ المبنى بالتحديد .	جانب	جنب
17526	corpus-6-test-corpus-26-train	MSA	لا , أعتقد أنهم نسوا أن يحضروا واحدة لنا .	لأ، بتوقع إنهم نسيوا يجيبولنا واحد.	لأ، بتوقع إنهم نسيوا يجيبولنا واحد.		لا, بظنهم نسيوا يجيبولنا وحدة.	نسوا	نسيوا
17537	corpus-6-test-corpus-26-train	MSA	حسناً . لقد تم التأكيد . هل يمكننا أن نأخذ رقم تليفونك في حالة الحاجة إلى الاتصال بك ؟	طيب. تأكدنا. ممكن تعطينا رقم تلفونك، بس في حالة احتجنا إنو نتواصل معك؟	طيب. تأكدنا. ممكن تعطينا رقم تلفونك، بس في حالة احتجنا إنو نتواصل معك؟		ماشي، اتأكدت . بنقدر نوخذ رقمك تلفونك في حال احتجنا نتصل فيك؟	يمكننا	بنقدر	بك	فيك
17548	corpus-6-test-corpus-26-train	MSA	ما هو اسم الرسام ؟	شو إسم الرسام؟	شو إسم الرسام؟		شو اسم الرسام؟	ما	شو
17559	corpus-6-test-corpus-26-train	MSA	هل أجعله يعاود الاتصال بك عندما يعود ؟	أخليه يتصل فيك مرة تانية بس يرجع؟	أخليه يتصل فيك مرة تانية بس يرجع؟		بتحب أخليه يرجع يرنلك بس يرجع؟	عندما	بس	يعاود	يرجع
17593	corpus-6-test-corpus-26-train	MSA	أود أن آخذ هذا .	أنا حابب آخد هاد.	أنا حابب آخد هاد.		بدي آخذ هاظا.	أود	بدي
17606	corpus-6-test-corpus-26-train	MSA	أحب هذه الخدمة بتقديم شامبانيا للتحية بعد الإقلاع . دعني أشرب فى صحتك .	بحب خدمة الترحيب بالشامبانيا بعد ما نطلع. بنخب صحتك.	بحب خدمة الترحيب بالشامبانيا بعد ما نطلع. بنخب صحتك.		بحب هاي خدمة توزيع شامبانيا للترحيب بعد ما نطير. خليني أشرب بصحتك.	تقديم	توزيع	تحية	ترحيب
17609	corpus-6-test-corpus-26-train	MSA	أربعون دولار يومياً ، بالإضافة إلى ثمانية سنت لكل ميل .	أربعين دولار لكل يوم زائد تمنية سنت لكل ميل.	أربعين دولار لكل يوم زائد تمنية سنت لكل ميل.		أربعين دولار كل يوم، مع زيادة ثمنية سنت عكل ميل.	إضافة	زيادة
17615	corpus-6-test-corpus-26-train	MSA	أراهن بخمسة دولارات .	راح أراهن بخمسة دولار.	راح أراهن بخمسة دولار.		براهن بخمس دولارات .
17636	corpus-6-test-corpus-26-train	MSA	هل هذا طلب شخص آخر .	هاد مش طلب حدا تاني غيري؟	هاد مش طلب حدا تاني غيري؟		هاظا طلب واحد ثاني؟	شخص	واحد	هاذ	هاظا
17645	corpus-6-test-corpus-26-train	MSA	هل قلت لي كيف أذهب إلى المتحف ؟	ممكن تحكيلي كيف أوصل للمتحف؟	ممكن تحكيلي كيف أوصل للمتحف؟		قلتلي كيف بروح على المتحف؟
17649	corpus-6-test-corpus-26-train	MSA	آسف جدا ، لكني أود تأجيل الميعاد .	أنا آسف كتير، بس أنا بدي اأجل الإجتماع.	أنا آسف كتير، بس أنا بدي اأجل الإجتماع.		آسف كثير، بس بدي أجل الموعد .	المعياد	الموعد
17652	corpus-6-test-corpus-26-test	MSA	هل رشحت لي رحلة قصيرة ؟	ممكن تنصحني برحلة؟	ممكن تنصحني برحلة؟		هل اخترتلي رحلة قصيرة؟	رشحت	اخترت
17660	corpus-6-test-corpus-26-train	MSA	سيغادر قطارك من الرصيف رقم ثمانية .	قطارك راح يطلع من رصيف تمنية.	قطارك راح يطلع من رصيف تمنية.		رح يطلع قطارك من السكة رقم ثمانية.	يغادر	يطلع	رصيف	سكة
17673	corpus-6-test-corpus-26-train	MSA	أبحث عن شنطة بحزام متحرك .	بدي شنطة بحزام ممكن ينشال.	بدي شنطة بحزام ممكن ينشال.		بدور على شنتة فيها قشاط مش ثابت .	حزام	قشاط
17674	corpus-6-test-corpus-26-train	MSA	أود أن تبقي تحت مائة وثمانين دولار .	حابب إنه يضل أقل من مية وتمانين دولار.	حابب إنه يضل أقل من مية وتمانين دولار.		بدي ياها تظل تحت المية وثمانين دولر.	تبقى	تظل
17739	corpus-6-test-corpus-26-train	MSA	سأسلك بعد أن ألقي نظرة هنا وهناك .	بروح بعد ما ألف بالمنطقة.	بروح بعد ما ألف بالمنطقة.		راح أمشي بعد ما أتفقد هون وهناك.	أسلك	أمشي
17745	corpus-6-test-corpus-26-test	MSA	نعم ، حجز لمدة ستة أيام من فضلك ، بدء من الثالث والعشرين من يوليو .	اه. حجز لست ليالي، لو سمحت. ببدا بتلاتة وعشرين يوليو.	اه. حجز لست ليالي، لو سمحت. ببدا بتلاتة وعشرين يوليو.		ايوه، حجز لست أيام لو سمحت، ببلش من ثلاث وعشرين ستة.	يوليو	ستة	يبدأ	ببلش
17757	corpus-6-test-corpus-26-train	MSA	هل يمكنك أن ترني أشياء أخري ذات تصميمات مختلفة .	ممكن تورجيني أشياء تانية بتصاميم مختلفة؟	ممكن تورجيني أشياء تانية بتصاميم مختلفة؟		ممكن توريني شغلات ثانية بأشكال غير؟	مختلف	غير	تصميمات	أشكال
17765	corpus-6-test-corpus-26-train	MSA	ما نوع العصير الذي تفضله ؟	شو نوع العصير اللي حابب تشربه؟	شو نوع العصير اللي حابب تشربه؟		شو نوع العصير اللي بتحبه ؟	بتفضله	بتحبه
17780	corpus-6-test-corpus-26-train	MSA	هل ستعود لبلادك في الاجازات ؟	بدك تروح على بلدك بالعطله؟	بدك تروح على بلدك بالعطله؟		راح ترجع على بلدك بالعطل؟	إجازات	عطل	تعود	ترجع
17782	corpus-6-test-corpus-26-dev	MSA	أين يمكنني الذهاب لكي أري منظراً رائعاً حقاً ؟	وين بقدر أروح أشوف إطلالة كتير حلوة؟	وين بقدر أروح أشوف إطلالة كتير حلوة؟		وين بقدر اروح عشان اشوف منظر بجنن فعلا؟	لكي	عشان
17786	corpus-6-test-corpus-26-test	MSA	كان هذا مكسوراً بالفعل عندما فتحت الطرد .	هاد كان أصلاً مكسوربس فتحت العلبة.	هاد كان أصلاً مكسوربس فتحت العلبة.		كان هاذ مكسور فعلاً لما فتحت الطرد.	بالفعل	فعلاً
17790	corpus-6-test-corpus-26-test	MSA	التاسع والعشرون من أغسطس .	تسعة وعشرين أغسطس.	تسعة وعشرين أغسطس.		تسعه وعشرين من آب.	أغسطس	آب
17797	corpus-6-test-corpus-26-train	MSA	أود أن أرسل ذلك إلى اليابان بالبريد الجوي .	بدي أبعت هاد بالإيميل الجوي على اليابان.	بدي أبعت هاد بالإيميل الجوي على اليابان.		بدي أودي هاي لليابان بالبريد الجوي.	أرسل	أودي
17798	corpus-6-test-corpus-26-train	MSA	عيد الشكر والعمال ، فهو يوم الشكر لكل الذين ساندوا المجتمع بأعمالهم .	عيد العمال. هو يوم شكر لكل هدول اللي بدعموا المجتمع بشغلهم.	عيد العمال. هو يوم شكر لكل هدول اللي بدعموا المجتمع بشغلهم.		عيد الشكر و العمال، يوم الشكر لكل الناس اللي ساعدوا المجتمع بشغلهم.	ساندوا	ساعدوا
17799	corpus-6-test-corpus-26-train	MSA	هذه الغرفة صغيرة جداً .	هاي الغرفة كثير صغيرة.	هاي الغرفة كثير صغيرة.		هاي الغرفة صغيرة كثير.	جداً	كثير
17803	corpus-6-test-corpus-26-train	MSA	هل يمكنني أن أحصل علي مزيد من الشاي ، من فضلك ؟	ممكن تصبلي كمان شاي، لو سمحت؟	ممكن تصبلي كمان شاي، لو سمحت؟		بقدر آخذ كمان شاي، لو سمحت؟	مزيد	كمان
17805	corpus-6-test-corpus-26-train	MSA	أريد أن أغسل ملابسي في وقت لاحق اليوم .	بدي اغسل اواعيي بعدين.	بدي اغسل اواعيي بعدين.		بدي أغسل وعيتي بوقت ثاني اليوم.	لاحق	ثاني	ملابسي	وعيتي
17808	corpus-6-test-corpus-26-train	MSA	هل يوجد بنك بالقرب من هنا ؟	في بنك قريب من هون؟	في بنك قريب من هون؟		في بنك قريب من هون؟
17811	corpus-6-test-corpus-26-train	MSA	هل من الممكن أن تنظف المنضدة من فضلك ؟	ممكن تنظف الطاولة، لو سمحت؟	ممكن تنظف الطاولة، لو سمحت؟		ممكن تنظف الطاولة، لو سمحت؟	المنضدة	الطاولة
17840	corpus-6-test-corpus-26-train	MSA	سكين ، من فضلك .	سكينة، لو سمحت.	سكينة، لو سمحت.		سكينة، لو سمحت.	سكين	سكينة
17841	corpus-6-test-corpus-26-train	MSA	هذه كلها مطبوعات .	كلهم أشياء مطبوعة.	كلهم أشياء مطبوعة.		هاي كلها مطبوعات.
17842	corpus-6-test-corpus-26-train	MSA	من فضلك ، اكتب رقم الغرفة في الخلف .	لو سمحت إكتب رقم غرفتك ورا.	لو سمحت إكتب رقم غرفتك ورا.		من فضلك ، اكتب رقم الغرفة بقفى الورقة.	خلف	قفى
17847	corpus-6-test-corpus-26-train	MSA	نستخدم الأعواد عندما نأكل .	إحنا منستخدم العيدان الصينية بس ناكل.	إحنا منستخدم العيدان الصينية بس ناكل.		بنستعمل العيدان لما بنوكل.	أعواد	عيدان
17852	corpus-6-test-corpus-26-train	MSA	رحلة الطيران دلتا رقم ثمانية وعشرون والمتجهة إلي نيو أورلينز سوف تتأخر حوالي ساعة .	رحلة طيران دلتا رقمها ثمنية وعشرين لنيو أورليانز رح تتأجل ساعة تقريباً.	رحلة طيران دلتا رقمها ثمنية وعشرين لنيو أورليانز رح تتأجل ساعة تقريباً.		رحلة الطيارة دلتا رقم ثمانية وعشرين اللي رايحة على نيو أورلينز حتى تتأخر حوالي ساعة.	متجهة	رايحة
17854	corpus-6-test-corpus-26-train	MSA	عندما أعود ثانية إلى اليابان ، سأكتب خطاباً . وإذا كان لديك وقت ، من فضلك أرسل لي خطاباً .	لما أرجع على اليابان، راح أكتب رسالة. إذا عندك وقت، لو سمحت إبعتلي رسالة.	لما أرجع على اليابان، راح أكتب رسالة. إذا عندك وقت، لو سمحت إبعتلي رسالة.		لما أرجع مرة ثانية لليابان، رح أكتب رسالة. وإذا كان عندك وقت، تكرم ابعثلي انا رسالة.	من فضلك	تكرم	أعود	أرجع
17855	corpus-6-test-corpus-26-train	MSA	نسيت تذكرة الطيران الخاصة بي في الفندق .	نسيت تذكرة الطيران بالفندق.	نسيت تذكرة الطيران بالفندق.		نسيت تذكرة الطيارة قيتي بالفندق.	الخاصة بي	قيتي
17861	corpus-6-test-corpus-26-train	MSA	غرفة مفردة بدون دش من فضلك .	غرفة مفردة بدون دش، لو سمحت.	غرفة مفردة بدون دش، لو سمحت.		غرفة مفردة بدون دش لو سمحت .
17869	corpus-6-test-corpus-26-train	MSA	أشكرك ثانية لأنك ذكرتني . هل يميل كثير من الناس أن ينسوا توقيع أسمائهم ؟	شكراً إلك مرة تانية ذكرتني. في كتير ناس بنسوا يسجلوا أسمائهم؟	شكراً إلك مرة تانية ذكرتني. في كتير ناس بنسوا يسجلوا أسمائهم؟		بشكرك مرة ثانية عشان ذكرتني. بروح كثير من الناس تنسى توقع ع أسمائهم ولا شو؟	يميل	بروح
17886	corpus-6-test-corpus-26-train	MSA	حسناً . ليس لدينا وقت . هل يمكن أن نكمل هذه المناقشة يوم الخميس في الساعة الواحدة ؟	طيب، معناش وقت. منقدر نكمل هاد النقاش الخميس الساعة وحدة؟	طيب، معناش وقت. منقدر نكمل هاد النقاش الخميس الساعة وحدة؟		طيب . ما عنا وقت . منقدر نكمل هاي المناقشة يوم الخميس الساعة وحدة ؟	لدينا	عنا
17899	corpus-6-test-corpus-26-test	MSA	أود بعض البيجامات .	بدي بيجامات.	بدي بيجامات.		بدي بيجامات.
17919	corpus-6-test-corpus-26-train	MSA	حسناً . سأتصل بك عندما يكونوا جاهزين .	طيب. راح أتصل فيك بس يكونوا جاهزيين.	طيب. راح أتصل فيك بس يكونوا جاهزيين.		ماشي. راح أتصل فيك لما يكونو جاهزين.
17935	corpus-6-test-corpus-26-train	MSA	ماذا عن الغداء ؟	شو بالنسبة للغدا؟	شو بالنسبة للغدا؟		شو عن الغدا؟	غداء	غدا
17947	corpus-6-test-corpus-26-test	MSA	ستقف الليموزين عند البوابة الشمالية أولاً .	الليموزين راح توقف عند البوابة الشمالية بالأول.	الليموزين راح توقف عند البوابة الشمالية بالأول.		الليموزين رح توقف عند البوابة الشمالية أول شي.
17963	corpus-6-test-corpus-26-train	MSA	إلى متي يظل مطعم الفندق متاحا للاستخدام من قبلي ؟	متى آخر وقت بقدر أضل أستخدم فيه مطعم الفندق؟	متى آخر وقت بقدر أضل أستخدم فيه مطعم الفندق؟		لمتى بظل مطعم الفندق مفتوح حتى أقعد فيه؟	متاح	مفتوح
17966	corpus-6-test-corpus-26-dev	MSA	هل هذا قطار مباشر ؟	هاد قطار مستقيم؟	هاد قطار مستقيم؟		هاذ القطار مباشر؟
17977	corpus-6-test-corpus-26-train	MSA	حسنا , الوقت متأخر إلى حد ما . أعتقد أنني يجب على أن أغادر الآن . شكرا جزيلا لك على الأمسية الرائعة .	طيب، عم بتأخر الوقت. بتوقع إنه لازم أطلع هلأ. شكراً إلك كتير على السهرة الحلوة.	طيب، عم بتأخر الوقت. بتوقع إنه لازم أطلع هلأ. شكراً إلك كتير على السهرة الحلوة.		ماشي, الوقت صار متأخر شوي. بظن انو لازم اروّح هسا. كتير شكرا على الليلة الممتعة.	أمسية	ليلة	رائعة	ممتعة
17986	corpus-6-test-corpus-26-train	MSA	هل لي أن أتناول بعض الدواء لآلام في معدتي ؟	بقدر آخد دوا لوجع البطن؟	بقدر آخد دوا لوجع البطن؟		ممكن آخذ شوية دوا للوجع بمعدتي؟	أتناول	آخذ
18003	corpus-6-test-corpus-26-train	MSA	أود أن أتناول فراخ مشوية .	بدي جاج مشوي.	بدي جاج مشوي.		بدي اوكل جاج مشوي.	فراخ	جاج
18018	corpus-6-test-corpus-26-train	MSA	إنه خطئي . ليس خطأك .	غلطي. هاد مش غلطك.	غلطي. هاد مش غلطك.		هاي غلطتي. مش غلطتك.	خطأ	غلطة
18036	corpus-6-test-corpus-26-train	MSA	معذرة , متي ينتهي هذا الفيلم ؟	عفواً، متى بخلص هاد الفيلم؟	عفواً، متى بخلص هاد الفيلم؟		عفواً, متى بخلص هذ الفلم؟	ينتهي	بخلص	معذرة	عفواً
18040	corpus-6-test-corpus-26-train	MSA	هذا , من فضلك .	هاد، لو سمحت.	هاد، لو سمحت.		هاظ ، لو سمحت.	هذا	هاظ
18077	corpus-6-test-corpus-26-train	MSA	لقد سرقت مجوهراتي . أنني بحاجة لتقديم بلاغ .	مجوهراتي إنسرقت. بدي أقدم تقرير.	مجوهراتي إنسرقت. بدي أقدم تقرير.		سرقوا صيغتي . لازم أقدم شكوى.	بلاغ	شكوى	مجوهراتي	صيغتي
18103	corpus-6-test-corpus-26-train	MSA	لحظة فقط , من فضلك . سأوصلك بالسيد جونز .	بس لحظة، لو سمحت. راح أشبكك مع الأستاذ جونز.	بس لحظة، لو سمحت. راح أشبكك مع الأستاذ جونز.		لحظة بس، لو سمحت. راح أشبكك مع الأستاذ جونز.	أوصلك	أشبكك
18110	corpus-6-test-corpus-26-train	MSA	مرحبا . هذه هي الخطوط الجوية المتحدة .	مرحبا. معك شركة طيران يونايتد.	مرحبا. معك شركة طيران يونايتد.		مرحبا . هاي هي الخطوط الجوية المتحدة .
18131	corpus-6-test-corpus-26-test	MSA	أين تعلم السيد جونز اللغة اليابانية ؟	وين تعلم الأستاذ جونز اللغة اليابانية؟	وين تعلم الأستاذ جونز اللغة اليابانية؟		وين السيد جونز تعلّم اللغة اليابانية؟
18138	corpus-6-test-corpus-26-train	MSA	لدي واحدة صغيرة من نفس التصميم .	عندي واحد صغير بنفس التصميم.	عندي واحد صغير بنفس التصميم.		عندي وحدة صغيرة من نفس التصميم.	واحدة	وحدة
18155	corpus-6-test-corpus-26-train	MSA	هل يمكنك ترتيب هذه البناطيل ؟	بتقدر تضيق هاد البنطلون؟	بتقدر تضيق هاد البنطلون؟		ممكن تصفط هالبناطيل؟	ترتب	تصفط
18161	corpus-6-test-corpus-26-train	MSA	مساء الجمعة , في التاسعة .	الجمعة بالليل، الساعة تسعة.	الجمعة بالليل، الساعة تسعة.		مسا الجمعة, عالتسعة.	مساء	مسا	تاسعة	تسعة
18166	corpus-6-test-corpus-26-train	MSA	هل هذه هي البوابة إلي لاس فيجاس ؟	هاي البوابة على لاس فيغاس؟	هاي البوابة على لاس فيغاس؟		هاي البوابة لـ لاس فيجاس؟	إلى	ل
18181	corpus-6-test-corpus-26-train	MSA	هل لديك أتوبيس من المطار ؟	عندك باص من المطار؟	عندك باص من المطار؟		عندك باص من المطار؟	أتوبيس	باص
18189	corpus-6-test-corpus-26-train	MSA	ملعقة أخرى , من فضلك .	معلقة تانية، لو سمحت.	معلقة تانية، لو سمحت.		معلقة ثانية, لو سمحت.	ملعقة	معلقة
18211	corpus-6-test-corpus-26-train	MSA	إنها مالحة قليلا , لكنني أحبها . هل أحضرتها معك طوال الطريق من اليابان ؟	هاد مالح شوي، بس حبيته. جبته معك طول الطريق من اليابان؟	هاد مالح شوي، بس حبيته. جبته معك طول الطريق من اليابان؟		هي شوي مالحة، بس بحبها. جبتها معك من اليابان طول الطريق؟	لكن	بس	أحبها	بحبها
18226	corpus-6-test-corpus-26-train	MSA	قم بدفعها من فضلك , إن كان ذلك ممكنا .	لو سمحت استعجل، إذا ممكن.	لو سمحت استعجل، إذا ممكن.		لو سمحت دزها , إذا بصير	دفع	دز	ممكن	بصير
18254	corpus-6-test-corpus-26-train	MSA	هل من الممكن أن تدفع مبلغ عشرة دولارات للمقدم ؟	ممكن تدفع عشرة دولار هون عشان التأمين؟	ممكن تدفع عشرة دولار هون عشان التأمين؟		بصير تدفع عشرة دولارات للمقدم؟
18264	corpus-6-test-corpus-26-train	MSA	نعم . أيقظني من النوم بعد ثلاثة ساعات , من فضلك .	صح. صحيني بعد تلت ساعات، لو سمحت.	صح. صحيني بعد تلت ساعات، لو سمحت.		أيوة . صحيني من النوم بعد ثلاث ساعات, لو سمحت.	أيقظني	صحيني
18273	corpus-6-test-corpus-26-dev	MSA	أود أن أطلب , من فضلك .	أنا بدي أطلب، لو سمحت.	أنا بدي أطلب، لو سمحت.		بدي أطلب , بعد إذنك.
18274	corpus-6-test-corpus-26-test	MSA	هل يجب على أن أجيب بـ نعم أو بـ لا ؟	لازم أحكي اه وإلا لأ؟	لازم أحكي اه وإلا لأ؟		لازم اجاوب بـ اه أو بـ لأ ؟	أجيب	أجاوب
18282	corpus-6-test-corpus-26-train	MSA	ملعقتين , من فضلك .	معلقتين، لو سمحت.	معلقتين، لو سمحت.		معلقتين , لو سمحت.
18323	corpus-6-test-corpus-26-train	MSA	ما هي المحطة القادمة ؟	شو هي المحطة التانية؟	شو هي المحطة التانية؟		شو هي المحطة الجاية ؟	القادمة	الجاية
18334	corpus-6-test-corpus-26-dev	MSA	السيارة تصدر صاخبا غريبا .	السيارة بتطلع صوت غريب.	السيارة بتطلع صوت غريب.		السيارة بطلع صوت غريب وعالي.	تصدر	بطلع	صاخب	عالي
18336	corpus-6-test-corpus-26-test	MSA	متي يغلق مكتب البريد أبوابه ؟	أي ساعة مكتب البريد بسكر؟	أي ساعة مكتب البريد بسكر؟		متى بيسكر مكتب البريد ؟	يقلق	بسكر	أبوابه	بوابه
18338	corpus-6-test-corpus-26-dev	MSA	لقد دفعت من قبل خمسون دولارا كعربون حينما قمت بتسجيل إجراءات إقامتي بالفندق .	أنا بالأساس دفعت عربون خمسين دولار بس عملت اجرات تسجب دخول الفندق.	أنا بالأساس دفعت عربون خمسين دولار بس عملت اجرات تسجب دخول الفندق.		دفعت قبل هيك خمسين دولار عربون لما سجلت بياناتي بالفندق.
18341	corpus-6-test-corpus-26-train	MSA	هل تناولت دواء لتقلبات المعدة ؟	أخدت دوا لإضطراب المعدة؟	أخدت دوا لإضطراب المعدة؟		أخذت دوا للمعدة؟	تناولت	أخذت
18342	corpus-6-test-corpus-26-train	MSA	هل أحتاج إلى أن أرتدي معطف و رابطة عنق ؟	لازم ألبس كبوت وجرافتة؟	لازم ألبس كبوت وجرافتة؟		بحتاج ألبس كبوت و قرافة؟	معطف	كبوت
18344	corpus-6-test-corpus-26-train	MSA	هل يمكنني أن أحول أموال إلى حساب المدخرات الخاص بي ؟	بقدر أنقل المصاري لحساباتي التوفير؟	بقدر أنقل المصاري لحساباتي التوفير؟		ممكن احول مصاري لحساب التوفير تاعي؟	أموال	مصاري	مدخرات	توفير
18355	corpus-6-test-corpus-26-train	MSA	لقد نسيت أن آخذ حقيبتي اليدوية .	نسيت شنطة اليد تبعتي.	نسيت شنطة اليد تبعتي.		نسيت آخذ شنتة الإيد.	يدوي	إيد
18382	corpus-6-test-corpus-26-train	MSA	أود إعادة التأكيد على حجز الرحلة .	بدي أرجع اأكد رحلتي.	بدي أرجع اأكد رحلتي.		بدي أكد مرة ثانية على حجز الرحلة.
18401	corpus-6-test-corpus-26-train	MSA	ساعتي . لقد كانت ساعة رقمية ماركة حديثة سويسرية الصنع .	ساعتي. كانت رقمية جديدة صناعة سويسرية .	ساعتي. كانت رقمية جديدة صناعة سويسرية .		ساعتي. كانت ساعة ديجيتال من ماركة سويسرية جديدة.
18409	corpus-6-test-corpus-26-test	MSA	لقد اجتزت هذا الاختبار بنجاح كبير .	نجحت بهاد الإمتحان بنتائج ممتازة.	نجحت بهاد الإمتحان بنتائج ممتازة.		عديت الامتحان بنجاح كبير .	اجتزت	عديت	اختبار	امتحان
18412	corpus-6-test-corpus-26-dev	MSA	أريدك أن تصحبني إلى بعض الأماكن الشيقة . أنني سائح , أنت تعرف .	بدي إياك تاخدني على أماكن ممتعة. أنا سائح، إنت بتعرف.	بدي إياك تاخدني على أماكن ممتعة. أنا سائح، إنت بتعرف.		بدي اياك توخذني معك على بعض الأماكن الحلوة. أنا سايح, إنت بتعرف.	تصحبني	توخذني	شيقة	حلوة
18419	corpus-6-test-corpus-26-train	MSA	هل يمكن أن أذهب لمشاهدة المعالم أثناء رسو السفينة في الميناء ؟	بقدر أروح على المعالم السياحية طول ما السفينة لسا بالمينا؟	بقدر أروح على المعالم السياحية طول ما السفينة لسا بالمينا؟		بقدر أروح اشوف المناظر لما السفينة تكون راسية بالمينا؟	ميناء	مينا	أشاهد	أشوف
18437	corpus-6-test-corpus-26-train	MSA	من الأفضل أن تضبط المرآة العاكسة للرؤية الخلفية .	أحسنلك تزبط المراية الخلفية.	أحسنلك تزبط المراية الخلفية.		أحسن شي تزبط المراية الخلفية.	تضبط	تزبط
18440	corpus-6-test-corpus-26-dev	MSA	ستنتظر حوالي عشرة دقائق أو ما يقارب ذلك .	راح يكون في عشر دقايق إنتظار أو إشي زي هيك.	راح يكون في عشر دقايق إنتظار أو إشي زي هيك.		رح تستني حوالي عشر دقايق أو هيك شي.	تنتظر	تستنى
18441	corpus-6-test-corpus-26-train	MSA	هل يمكن أن آخذ الأطباق الخاصة بك ؟	بقدر آخد صحونك؟	بقدر آخد صحونك؟		ممكن آخذ صحونك؟	أطباقك	صحون
18451	corpus-6-test-corpus-26-train	MSA	سأكون سعيدا بذلك . متى ترغب في ذلك ؟	رح اكون كتير مبسوط. متى بتحب؟	رح اكون كتير مبسوط. متى بتحب؟		رح اكون مبسوط لهالشي. متى بدك ياه؟	سعيد	مبسوط
18487	corpus-6-test-corpus-26-train	MSA	أعتقد أنني تركت كاميرتي وغادرت عندما كنت أتناول العشاء هنا الليلة الماضية .	بتوقع إني نسيت كاميرتي وراي لما تعشيت هون الليلة الماضية.	بتوقع إني نسيت كاميرتي وراي لما تعشيت هون الليلة الماضية.		بظن اني تركت كميرتي و روحت لما كنت اكل هون امبارح عالعشا.	عشاء	عشا	كاميرتي	كميرتي
18492	corpus-6-test-corpus-26-train	MSA	اجمعهم عند البوابة .	جمعهم عند البوابة.	جمعهم عند البوابة.		جمعهم عند البوابة.	اجمع	جمع
18502	corpus-6-test-corpus-26-train	MSA	أوه ، لا . لن يكون هذا ضرورياً . أستطيع أن اعتني به . لقد قمت بالفعل بما هو اكثر من كاف .	أووه، لأ. هاد مش ضروري. أنا بقدر أهتم فيه. إنت أصلاً عملت أكتر من اللي لازم ينعمل.	أووه، لأ. هاد مش ضروري. أنا بقدر أهتم فيه. إنت أصلاً عملت أكتر من اللي لازم ينعمل.		أوه ، لا . هاذ مش ضروري . أنا بقدر أدبر بالموضوع. صراحة أنت سويت أكثر من اللازم.	أعتني	أدبر	قمت	سويت
18519	corpus-6-test-corpus-26-train	MSA	إما أن تصلحها أو تستبدلها ، من فضلك .	يا بتصلحه يا بتبدله، لو سمحت.	يا بتصلحه يا بتبدله، لو سمحت.		يا تصلحها يا تبدلها، لو سمحت.	إما	يا	تستبدلها	تبدلها
18521	corpus-6-test-corpus-26-train	MSA	يمكنني القيام بها في وقتا ما الشهر القادم .	أنا بقدر أعمله بوقت تاني الشهر الجاي.	أنا بقدر أعمله بوقت تاني الشهر الجاي.		ممكن اعملها اي وقت بالشهر الجاي.	ما	أي	القادم	الجاي
18527	corpus-6-test-corpus-26-train	MSA	من فضلك تروى .	لو سمحت تمهل.	لو سمحت تمهل.		لو سمحت هدي.	تروى	هدّي
18531	corpus-6-test-corpus-26-train	MSA	كيف يتم مقارنة هذا المنتج الجديد مع المنتجات الموجودة ؟	كيف بتقارن هاد المنتج الجديد بالمنتجات الموجودة؟	كيف بتقارن هاد المنتج الجديد بالمنتجات الموجودة؟		كيف بدنا نقارن هاذ المنتج الجديد مع المنتجات اللي عنا؟
18540	corpus-6-test-corpus-26-train	MSA	موظفو المبيعات في هذا المتجر لطفاء جداً .	موظفين المبيعات بهاد المحل كتير لطيفين.	موظفين المبيعات بهاد المحل كتير لطيفين.		موظفين المبيعات بهاذ المحل لطيفين كثير.	لطفاء	لطيفين	متجر	محل
18552	corpus-6-test-corpus-26-train	MSA	هلا احتفظت بهذا لي ؟	بتقدر تحتفظلي بهاد معك؟	بتقدر تحتفظلي بهاد معك؟		ممكن تظبلي هاد؟	تحتفظ	تظب
18562	corpus-6-test-corpus-26-train	MSA	دقيقة فقط ، من فضلك .	دقيقة، لو سمحت.	دقيقة، لو سمحت.		ديقة بس، لو سمحت.
18569	corpus-6-test-corpus-26-train	MSA	هل لديك بطاقات ادعائك ؟	عندك بطاقات الاستلام تبعك؟	عندك بطاقات الاستلام تبعك؟		عندك انت بطاقات دعوتك؟	إدعاء	دعوة
18572	corpus-6-test-corpus-26-train	MSA	أرغب في تأجير سيارة لمدة أسبوع .	بدي استأجر سيارة لأسبوع.	بدي استأجر سيارة لأسبوع.		حاب أستأجر سيارة لمدة أسبوع.	أرغب	حاب
18580	corpus-6-test-corpus-26-train	MSA	نعم , في بادئ الأمر ، اغسليها على منفصلة .	اه، أول إشي، إغسل كل واحد لحال.	اه، أول إشي، إغسل كل واحد لحال.		أيوة, بالأول, غسليها لحالها.	بادئ	أول	منفصلة	لحالها
18585	corpus-6-test-corpus-26-train	MSA	من فضلك أرني بعض الساعات الرجالي .	لو سمحت ورجيني ساعات رجالية.	لو سمحت ورجيني ساعات رجالية.		بعد إذنك ورجيني بعض الساعات الرجالي.	أرني	ورجيني
18595	corpus-6-test-corpus-26-train	MSA	إنها أربعة عشرة .	هو أربعطعش.	هو أربعطعش.		هاي أربعطعش.	أربعة عشر	أربعطعش
18612	corpus-6-test-corpus-26-dev	MSA	كم تتكلف الليموزين للذهاب إلى وسط المدينة ؟	كم بتكلف الليموزين عشان تروح على مركز المدينة؟	كم بتكلف الليموزين عشان تروح على مركز المدينة؟		قديش تكلف الليموزين عشان نروح عوسط البلد؟	مدينة	بلد
18614	corpus-6-test-corpus-26-train	MSA	منذ هذا الصباح .	من الصبح.	من الصبح.		من الصبح.	منذ	من
18617	corpus-6-test-corpus-26-train	MSA	من الأفضل أن نسرع . انهم يركبون بالفعل .	الأحسن نسرع. هما أصلا طلعوا.	الأحسن نسرع. هما أصلا طلعوا.		أحسن لو نسرع، همه بالفعل ركبو.	أفضل	أحسن
18632	corpus-6-test-corpus-26-test	MSA	أنها مناسبة تماما .	مناسب كتير.	مناسب كتير.		زابطة تماما.	مناسبة	زابطة
18639	corpus-6-test-corpus-26-train	MSA	طلبت دجاجا .	طلبت جاج.	طلبت جاج.		طلبت جاج.	دجاج	جاج
18640	corpus-6-test-corpus-26-train	MSA	لمدة عشرة أيام .	لعشر أيام.	لعشر أيام.		لعشر إيام.	أيام	إيام
18642	corpus-6-test-corpus-26-train	MSA	كم عمر هذا الصبي ؟	كم عمر هاد الولد؟	كم عمر هاد الولد؟		قديش عمر هالولد؟	صبي	ولد
18643	corpus-6-test-corpus-26-train	MSA	كم التكلفة كلها ؟	كم كله مع بعض؟	كم كله مع بعض؟		قديش الكلفة كلها؟	كم	قديش
18646	corpus-6-test-corpus-26-train	MSA	أريد نفس الشيء ، من فضلك .	بدي نفس الاشي، لو سمحت.	بدي نفس الاشي، لو سمحت.		بدي نفس الشي، لو سمحت.	شيء	شي
18685	corpus-6-test-corpus-26-train	MSA	لقد فقدت شيكاتي السياحية .	أنا ضيعت شيكاتي السياحية.	أنا ضيعت شيكاتي السياحية.		ضيعت الشيكات السياحية تبعتي.	فقدت	ضيعت
18687	corpus-6-test-corpus-26-train	MSA	من فضلك أعطني دواء للبرد .	لو سمحت أعطيني دوا رشح.	لو سمحت أعطيني دوا رشح.		من فظلك عطيني دوا للرشح.	برد	رشح
18690	corpus-6-test-corpus-26-train	MSA	من فضلك ضعها في قمع .	لو سمحت حطها بقرطوس.	لو سمحت حطها بقرطوس.		لو سمحت حطها ببوري.	ضعها	حطها	قمع	بوري
18725	corpus-6-test-corpus-26-train	MSA	أراه دائما كل صباح في القطار .	أنا دايما بشوفه كل يوم الصبح بالقطار.	أنا دايما بشوفه كل يوم الصبح بالقطار.		بشوفه دايما كل صبح في القطار.	دائما	دايما	أراه	بشوفه
18727	corpus-6-test-corpus-26-train	MSA	هل تستطيع أن تتناول العشاء معنا هذا المساء ؟	بتقدر تتعشا معنأ اليوم المسا؟	بتقدر تتعشا معنأ اليوم المسا؟		بتقدر تتعشى معنا الليلة؟	المساء	الليلة
18747	corpus-6-test-corpus-26-train	MSA	سأقيم في فندق بي حتى غداً . أكون مسروراً إذا أخبرته أنني هنا .	راح أضل بفندق بي لبكرا. راح أكون مبسوط إذا حكتله إني هون.	راح أضل بفندق بي لبكرا. راح أكون مبسوط إذا حكتله إني هون.		راح أقعد بفندق بي لبكرا. بكون مبسوط لو خبرته إني هون.	أقيم	أقعد	مسرور	مبسوط
18770	corpus-6-test-corpus-26-train	MSA	تأجلت الرحلة الجوية لمدة خمسة وأربعين دقيقة .	تأخرت الرحلة لمدة خمسة وأربعين دقيقة.	تأخرت الرحلة لمدة خمسة وأربعين دقيقة.		الطيارة تأجلت خمسة و أربعين دقيقة.
18771	corpus-6-test-corpus-26-train	MSA	اسمى شينو يامادا .	إسمي شينو يامادا.	إسمي شينو يامادا.		إسمي شينو يامادا.
18784	corpus-6-test-corpus-26-train	MSA	ما هو تخصص هذا المطعم ؟	بشومتخصص هاد المطعم؟	بشومتخصص هاد المطعم؟		بشو متخصص هاذ المطعم
18798	corpus-6-test-corpus-26-test	MSA	لدينا نبيذ أبيض ممتاز .	عنا خمر أبيض ممتاز.	عنا خمر أبيض ممتاز.		عندنا واين ابيض ممتاز .
18830	corpus-6-test-corpus-26-train	MSA	فقط دواء للبرد .	بس دوا رشح.	بس دوا رشح.		بس دوا للفلونزا.	برد	فلونزا
18834	corpus-6-test-corpus-26-dev	MSA	هل تستطيع إنزال أمتعي إلى الردهة غداً صباحاً ؟	بتقدر تجبلي شنطي تحت على اللوبي بكرا الصبح؟	بتقدر تجبلي شنطي تحت على اللوبي بكرا الصبح؟		ممكن تنزل أغراضي على الردهة بكرة الصبح؟
18836	corpus-6-test-corpus-26-train	MSA	أوه ، يبدو أنني افقد شيء ما كل وقت أسافر فيه .	أووه، أنا شكلي لازم أضيع إشي بكل مرة بسافر فيها.	أووه، أنا شكلي لازم أضيع إشي بكل مرة بسافر فيها.		أوه، شكلني بضيع اشي كل مرة بسافر فيها.	وقت	مرة
18845	corpus-6-test-corpus-26-train	MSA	فقدت استخدام الذراع الأيمن .	أنا ما بقدر أستخدام إيدي اليمين.	أنا ما بقدر أستخدام إيدي اليمين.		بطلت أقدر أستخدم إيدي اليمين	ذراع	إيد	فقدت	بطلت
18847	corpus-6-test-corpus-26-train	MSA	هالو ، هل هذه تعود إلى روي ؟	مرحبا،هاي لروي؟	مرحبا،هاي لروي؟		مرحبا، هاي لروي؟	هالو	مرحبا
18848	corpus-6-test-corpus-26-test	MSA	عندئذ ، ستأتي إلى شارع تسوق . إذا سلكت الشارع ستصل إلى المحطة .	بعدين، راح توصل لشارع تسوق. إذا ضليتك ماشي فيه راح توصل للمحطة.	بعدين، راح توصل لشارع تسوق. إذا ضليتك ماشي فيه راح توصل للمحطة.		بالوقت هاظ، رح تيجي على شارع للتسوق. اذا مشيت هالشارع رح توصل عالمحطة.	سلكت	مشيت	عندئذ	بالوقت
18872	corpus-6-test-corpus-26-train	MSA	لا ، ليس هنا . هناك حجرة تدخين قرب مؤخرة هذه الحافلة .	لأ، مش هون. هناك في غرفة تدخين قريبه منم اخر هاي الباص.	لأ، مش هون. هناك في غرفة تدخين قريبه منم اخر هاي الباص.		لا، مش هون. في غرفة تدخين قريبة بآخر هاذ الباص.	مؤخرة	آخر	حجرة	غرفة
18877	corpus-6-test-corpus-26-train	MSA	هل لي بدليل سياحي ؟	ممكن آخد نشرة؟	ممكن آخد نشرة؟		ممكن مرشد سياحي؟	هل لي	ممكن
18879	corpus-6-test-corpus-26-train	MSA	كن هناك بحلول التاسعة ، من فضلك .	كون هناك الساعة تسعة، لو سمحت.	كون هناك الساعة تسعة، لو سمحت.		كون هناك على الساعة تسعة، لو سمحت.	كن	كون
18906	corpus-6-test-corpus-26-train	MSA	نعم ، سيدي . كيف تريدني أن اقطعها ؟	اه، أستاذ. كيف بدك إياني أقطعها؟	اه، أستاذ. كيف بدك إياني أقطعها؟		أيوة ، يا سيدي . كيف بدك إني أقصها؟	أقطعها	أقصها
18912	corpus-6-test-corpus-26-test	MSA	اعتقد أن هناك خطأ في الفاتورة .	بتوقع إنه في خطأ بالفاتورة.	بتوقع إنه في خطأ بالفاتورة.		بظن انو في غلط بالفاتورة.	خطأ	غلط
18917	corpus-6-test-corpus-26-train	MSA	زيت و خل فقط سيكون جيداَ .	بس زيت وخل بكون تمام.	بس زيت وخل بكون تمام.		زيت وخل بس رح يكون مليح.	جييد	مليح
18919	corpus-6-test-corpus-26-train	MSA	لقد فهمت ما أردت أنت بالضبط . هل لي أن اقترح ذلك ؟	أنا أخدت بالزبط اللي إنت بدك إياه. بقدر أقترح هاد؟	أنا أخدت بالزبط اللي إنت بدك إياه. بقدر أقترح هاد؟		فهمت شو بدك بالضبط. ممكن اقترح هيك؟	ذلك	هيك
18938	corpus-6-test-corpus-26-train	MSA	قهوة بالسكر .	قهوة مع سكر.	قهوة مع سكر.		قهوة مع سكر.
18948	corpus-6-test-corpus-26-train	MSA	إنها سبعة عشر ايه . اوه ، انا آسف . لقد أخطأت .	هو سبعطعش ايه. أووه، أنا آسف. غلطت.	هو سبعطعش ايه. أووه، أنا آسف. غلطت.		هي سبعتعشر ايه . اوه ، أني آسف . غلطت	أخطأت	غلطت
18951	corpus-6-test-corpus-26-test	MSA	هل سمعت من قبل عن أسبوع ذهبي في اليابان ؟	عمرك سمعت عن الأسبوع الدهبي باليابان؟	عمرك سمعت عن الأسبوع الدهبي باليابان؟		سمعت قبل هيك عن الاسبوع الذهبي باليابان؟
18957	corpus-6-test-corpus-26-train	MSA	شكراً لك . من فضلك عاود مرة أخرى .	شكراً. لو سمحت إرجع مرة تانية.	شكراً. لو سمحت إرجع مرة تانية.		مشكور. يلا جرب مرة ثانية من فضلك.	هيا	يلا
18963	corpus-6-test-corpus-26-test	MSA	هل هو محجوز بالكامل ؟	لسا الحجوزات مسكرة؟	لسا الحجوزات مسكرة؟		هو محجوز كله؟	بالكامل	كله
18974	corpus-6-test-corpus-26-test	MSA	هل يمكنني تركها في أي مكان من البلاد ؟	بقدر أتركها بأي مكان بالعالم؟	بقدر أتركها بأي مكان بالعالم؟		بقدر أسيبها بأي مكان بالبلد؟	بلاد	بلد	أتركها	أسيبها
18986	corpus-6-test-corpus-26-test	MSA	ما الرقم الذي أطلب منه هنا ؟	على أي رقم لازم أحكي من هون؟	على أي رقم لازم أحكي من هون؟		شو الرقم اللي بطلب منه هون؟
19002	corpus-6-test-corpus-26-train	MSA	كيف يمكنني الذهاب إلى ديزني لاند ؟	كيف أروح على الديزني لاند؟	كيف أروح على الديزني لاند؟		شلون بقدر أروح على ديزني لاند؟
19005	corpus-6-test-corpus-26-train	MSA	أتظن ذلك ؟	بتتوقع هيك؟	بتتوقع هيك؟		بتظن هيك؟
19007	corpus-6-test-corpus-26-train	MSA	معذرة . أين المطعم الرئيسي ؟	عفواً. وين المطعم الرئيسي؟	عفواً. وين المطعم الرئيسي؟		عفواً . وين المطعم الرئيسي؟	أين	وين
19009	corpus-6-test-corpus-26-train	MSA	أريد الاتصال هاتفياً باليابان .	بدي أعمل مكالمة لليابان.	بدي أعمل مكالمة لليابان.		بدي أتصل بالتيلفون على اليابان.
19036	corpus-6-test-corpus-26-test	MSA	رقم مقعدي دي اثنا عشر . أين هو ؟	رقم مقعدي دي طنعش. وينه؟	رقم مقعدي دي طنعش. وينه؟		رقم كرسيي دي اثنعش. وين هو؟	اثنا عشر	اثنعش	مقعد	كرسي
19037	corpus-6-test-corpus-26-dev	MSA	ما هذا من فضلك ؟	شو هاد، لو سمحت؟	شو هاد، لو سمحت؟		شو هاظ لو سمحت؟
19038	corpus-6-test-corpus-26-train	MSA	ما النمط الذي في مخيلتك ؟	شو الشكل اللي حاطه ببالك؟	شو الشكل اللي حاطه ببالك؟		شو النمط اللي بخيالك؟	مخيلة	خيال
19045	corpus-6-test-corpus-26-train	MSA	أجل . سنصل في الثامنة حسب التوقيت المحلي .	صح. راح نوصل الساعة تمنية بالوقت المحلي.	صح. راح نوصل الساعة تمنية بالوقت المحلي.		أها. رح نوصل الساعة ثمنية بالتوقيت المحلي.	نصل	نوصل	ثمانية	ثمنية
19050	corpus-6-test-corpus-26-train	MSA	إن عثرت على شيء ، اتصل بي من فضلك .	إذا لقيت أي إشي، رنلي لو سمحت.	إذا لقيت أي إشي، رنلي لو سمحت.		لو لقيت إشي، رنلي إذا تكرمت.	عثرت	لقيت
19057	corpus-6-test-corpus-26-train	MSA	هل لي في شيء من لحم الخنزير والبيض ؟	ممكن لحم خنزير وبيض؟	ممكن لحم خنزير وبيض؟		ممكن شوية من لحم الخنزير والبيض؟	شيء	شوية
19064	corpus-6-test-corpus-26-train	MSA	شراب الشمام كحلاء ، من فضلك .	عصير بطيخ للتحلاية، لو سمحت.	عصير بطيخ للتحلاية، لو سمحت.		عصير الشمام كحلو ، لو سمحت.	شراب	عصير	حلاء	حلو
19068	corpus-6-test-corpus-26-train	MSA	المياه الساخنة ليست ساخنة بالقدر الكافي .	المي السخنة مش سخنة كتير.	المي السخنة مش سخنة كتير.		المية الحامية مش حامية بشكل كافي.	قدر	شكل	ساخنة	حامية
19085	corpus-6-test-corpus-26-train	MSA	هل يمكنك توضيح كيفية عمل ذلك ؟	ممكن تشرحلي كيف بنعمل هاد؟	ممكن تشرحلي كيف بنعمل هاد؟		ممكن تشرحلي كيف بشتغل هاذ؟	ذلك	هاذ	توضح	تشرح
19094	corpus-6-test-corpus-26-train	MSA	من فضلك سجل عنوان الاتصال بك هنا .	لو سمحت إكتب عنوانك هون.	لو سمحت إكتب عنوانك هون.		من فضلك اكتب عنوانك للتواصل معك هون.	إتصال	تواصل	سجل	اكتب
19100	corpus-6-test-corpus-26-train	MSA	هل يمكنني استخدام إِشارة ضوئية ؟	عادي أستخدم الشارةالضوئية؟	عادي أستخدم الشارةالضوئية؟		ممكن استعمل إشارة ضوئية؟	استخدم	استعمل
19101	corpus-6-test-corpus-26-train	MSA	شكراً . عد إلى غرفتي في نفس الوقت غدا . ستكون الصور جاهزة . قبل ذلك .	شكراً إلك. إرجع على غرفتي بكرا بنفس الوقت. راح أكون جهزت الصور بهداك الوقت.	شكراً إلك. إرجع على غرفتي بكرا بنفس الوقت. راح أكون جهزت الصور بهداك الوقت.		مشكور، ارجع لغرفتي بنفس الوقت بكرة . الصور رح تكون جاهزة . قبل هيك .	عد	ارجع	غد	بكرا
19103	corpus-6-test-corpus-26-train	MSA	آسف فالآن لا يمكنك الطلب سوى من قائمة الطعام الليلية .	آسف حالياً بتقدر تطلب بس من القائمة المسائية.	آسف حالياً بتقدر تطلب بس من القائمة المسائية.		آسف، هسا ما بتقدر تطلب إلا من القائمة الليلية بس.	سوى	إلا
19113	corpus-6-test-corpus-26-train	MSA	برصاص أم بدون رصاص ؟	عادي ولا منقى؟	عادي ولا منقى؟		برصاص ولا بدون رصاص	أم	ولا
19144	corpus-6-test-corpus-26-train	MSA	أشعر بصداع .	عندي صداع.	عندي صداع.		بحس بصداع.	أشعر	بحس
19147	corpus-6-test-corpus-26-test	MSA	هذه هي الغرفة اثنا عشر صفر سبعة .	هاي هيه غرفة طنعش صفر سبعة.	هاي هيه غرفة طنعش صفر سبعة.		هاي هي الغرفة اثنعش صفر سبعة.
19148	corpus-6-test-corpus-26-test	MSA	أريد غرفة أخرى .	بدي غرفة تانية.	بدي غرفة تانية.		بدي غرفة ثانية.	أخرى	ثانية
19156	corpus-6-test-corpus-26-train	MSA	كم مدة صلاحية هذه الفيزا ؟	لمتى هاي الفيزا راح تضل شغالة؟	لمتى هاي الفيزا راح تضل شغالة؟		كم مدة صلاحية هاي الفيزا ؟
19162	corpus-6-test-corpus-26-train	MSA	هل ثمة مستشفى قريب من هنا ؟	في مستشفى قريب من هون؟	في مستشفى قريب من هون؟		في مستشفى قريب من هون؟	ثمة	في
19170	corpus-6-test-corpus-26-train	MSA	أريد بزة .	بدي بدلة.	بدي بدلة.		بدي سترة.	بزة	سترة
19196	corpus-6-test-corpus-26-train	MSA	ألديك مقاس أوسع ؟	عندك قياس أكبر؟	عندك قياس أكبر؟		عندك حجم أوسع ؟	مقاس	حجم
19215	corpus-6-test-corpus-26-test	MSA	هل يمكن أن أقيس مقاس تسعة .	ممكن أقيس مقاس تسعة؟	ممكن أقيس مقاس تسعة؟		ممكن أقيس مقاس تسعة ؟
19217	corpus-6-test-corpus-26-train	MSA	أريد فندقاً آمنا يقدم إفطاراً جيدا ، من فضلك ؟	بدي فندق فيه أمان و بقدم فطور زاكي كتير، لو سمحت.	بدي فندق فيه أمان و بقدم فطور زاكي كتير، لو سمحت.		بدي فندق آمن ، بقدم فطور كويس ، لو سمحت ؟	جيد	كويس
19226	corpus-6-test-corpus-26-train	MSA	أين حديقة الحيوان ؟	وين حديقة الحيوانات؟	وين حديقة الحيوانات؟		وين حديقة الحيوانات؟
19232	corpus-6-test-corpus-26-train	MSA	هل لديك أحجام أكبر ؟	في عندك مقاس أكبر ؟	في عندك مقاس أكبر ؟		عندك أحجام أكبر؟
19250	corpus-6-test-corpus-26-dev	MSA	ثلاثون دولاراً وثمانون سنتا .	تلاتين دولار وتمانين سنت.	تلاتين دولار وتمانين سنت.		ثلاثين دولار وثمانين سنت.
19251	corpus-6-test-corpus-26-train	MSA	يتوقف الأمر على درجة حرارة المكان . ولكن في وسط اليابان , في أوائل أبريل .	بيعتمد على قديش المكان دافي، بس في وسط اليابان، بأول أبريل.	بيعتمد على قديش المكان دافي، بس في وسط اليابان، بأول أبريل.		الأمر بتعتمد على حرارة المكان. بس بوسط اليابان, بأول نيسان.	إبريل	نيسان	يتوقف	بعتمد
19258	corpus-6-test-corpus-26-train	MSA	أريد سندويتش برجر بالجبن ومقليات .	بدي برجر بالجبنة مقالي.	بدي برجر بالجبنة مقالي.		بدي ساندويشة برغر بالجبنة ومقالي.	مقليات	مقالي	جبن	جبنة
19269	corpus-6-test-corpus-26-train	MSA	لقد بالغ آخر قطار في التأخر .	كتير تأخر القطار الأخير.	كتير تأخر القطار الأخير.		اخر قطار تأخر كثير.
19281	corpus-6-test-corpus-26-train	MSA	ليس معي فكة صغيرة .	ما عندي أي فراطة.	ما عندي أي فراطة.		ما معي فراطة.
19294	corpus-6-test-corpus-26-train	MSA	هل أخذت تذكرة الحافلة ؟	أخدت تذكرة الباص؟	أخدت تذكرة الباص؟		اخذت تذكرة الباص؟	حافلة	باص
19306	corpus-6-test-corpus-26-train	MSA	البطاقة الائتمانية ، من فضلك .	الكرديت كارد، لو سمحت.	الكرديت كارد، لو سمحت.		الفيزا , لو سمحت.
19307	corpus-6-test-corpus-26-train	MSA	كنت على رحلة يونيتد إيرلاينز رقم ثمانية اثنان ثمانية .	كنت في رحلة طيران يونايتد تمنية اتنين تمنية.	كنت في رحلة طيران يونايتد تمنية اتنين تمنية.		كنت برحلة يونايتد إيرلاينز الرقم ثمانية اثنين ثمانية.
19317	corpus-6-test-corpus-26-train	MSA	إن حول غرفتي ضجيجا بالغا .	في كتير إزعاج حولين غرفتي.	في كتير إزعاج حولين غرفتي.		في ضجة كبيرة حوال غرفتي	ضجيج	ضجة	بالغ	كبير
19318	corpus-6-test-corpus-26-train	MSA	على الساحل الشرقي ، تجد أيضاً أماكن شهيرة . مثل نيويورك ، واشنطن ، دي دي وبوسطن .	في الساحل الشرقي، برضو بتلاقي أماكن مشهورة، متل نيويورك، واشنطن دي سي وبوسطن.	في الساحل الشرقي، برضو بتلاقي أماكن مشهورة، متل نيويورك، واشنطن دي سي وبوسطن.		على الساحل الشرقي، بتلاقي كمان أمكان معروفة. زي نيويورك, واشنطن, دي دي وبوسطن.	شهيرة	معروفة	مثل	زي
19327	corpus-6-test-corpus-26-train	MSA	هل لديك صحف يابانية ؟	عندك جرايد يابانةي؟	عندك جرايد يابانةي؟		عندك جرايد يابانية؟	صحف	جرايد
19329	corpus-6-test-corpus-26-train	MSA	هذا طيب ، على ما يبدو .	شكله زاكي.	شكله زاكي.		هاذ طيب ، من شكله.
19346	corpus-6-test-corpus-26-train	MSA	هل تمانع في أن أترك حقائبي معك حتى الساعة الواحدة ؟	بمشي الحال إذا تركت شنطي معك للساعة وحدة؟	بمشي الحال إذا تركت شنطي معك للساعة وحدة؟		بتمانع لو أترك شناتيي عندك لحد الساعة وحدة؟	حتى	لحد
19347	corpus-6-test-corpus-26-train	MSA	هل ثمة رحلة في المدينة ؟	في رحلة بالمدينة؟	في رحلة بالمدينة؟		في رحلة بالبلد؟
19360	corpus-6-test-corpus-26-train	MSA	أجل . أخشى أني مضطر لذلك . ما مدى حفظ الأمن في هذه المنطقة ؟	صح. آسف إنا مضطر. لأي مدى الأمن موجود بهاي المنطقة؟	صح. آسف إنا مضطر. لأي مدى الأمن موجود بهاي المنطقة؟		أكيد. خايف أنو مجبور على هيك. قديش الأمان مطمن بالمنطقة هاي؟	أخشى	خايف	مضطر	مجبور
19391	corpus-6-test-corpus-26-train	MSA	أفهم ذلك . أحاول استئجار سيارة سيتروين .	فهمت. أنا بحاول استأجر سيارة ستروين.	فهمت. أنا بحاول استأجر سيارة ستروين.		بفهم هالاشي. بحاول أستأجر سيارة سيتروين.
19401	corpus-6-test-corpus-26-dev	MSA	لدي موهبة فطرية .	عندي موهبة فطرية من يوم ما إنولدت.	عندي موهبة فطرية من يوم ما إنولدت.		عندي موهبة طبيعية.	فطرية	طبيعية
19413	corpus-6-test-corpus-26-train	MSA	هذا رائع . أين الخبز ؟	ممتاز. وين الخبز؟	ممتاز. وين الخبز؟		هاذ ممتاز . وين الخبز؟	رائع	ممتاز
19415	corpus-6-test-corpus-26-train	MSA	ركن المدخنين ، من فضلك . وشباك بجوار النافذة ، من فضلك .	للمدخنين، لو سمحت. وكرسي عند الشباك، لو سمحت.	للمدخنين، لو سمحت. وكرسي عند الشباك، لو سمحت.		ركن الشيشانيين، إذا سمحت. وشباك جمب النافذة، إذا سمحت.
19423	corpus-6-test-corpus-26-train	MSA	كم تتقاضى نظير التفصيل ؟	وشو أجرتك على الخياطة؟	وشو أجرتك على الخياطة؟		قديش بتوخذ بدال التفصيل؟	نظير	بدال	تتقاضى	بتوخذ
19444	corpus-6-test-corpus-26-dev	MSA	أيهما أسرع : سيارة أجرة أم إسعاف ؟	مين أسرع، التاكسي والا سيارة الإسعاف؟	مين أسرع، التاكسي والا سيارة الإسعاف؟		أي وحدة أسرع: تكسي ولا سيارة الإسعاف؟	أيهما	أي وحدة
19460	corpus-6-test-corpus-26-train	MSA	هل لديك ألوان أخرى لهذا التي شيرت ؟	عندك الوان تانيه من هاي البلوزة؟	عندك الوان تانيه من هاي البلوزة؟		عندك الوان ثانية لهاظا التيشيرت؟
19463	corpus-6-test-corpus-26-test	MSA	ينبغي ألا تشاهد التليفزيون طوال الوقت .	مش لازم تحضر تلفزيون طول الوقت.	مش لازم تحضر تلفزيون طول الوقت.		لازم ما تتفرج على التلفزيون طول الوقت.	طوال	طول	نشاهد	نتفرج
19466	corpus-6-test-corpus-26-train	MSA	أجل ، إننا على وشك معالجته ، على وشك معالجته .	اه، إحنا جايين عليه، جايين عليه.	اه، إحنا جايين عليه، جايين عليه.		أه، احنا على وشك نعالجه, على وشك نعالجه.
19467	corpus-6-test-corpus-26-train	MSA	من الأفضل لك أن تدخل مستشفانا .	كان الأحسن إنك تدخل على المستشفى تبعنا.	كان الأحسن إنك تدخل على المستشفى تبعنا.		أحسنلك تدخل مستشفانا.
19469	corpus-6-test-corpus-26-train	MSA	أين يمكنني أن أجد سوبر ماركت ؟	وين بقدر ألاقي سوبر ماركت؟	وين بقدر ألاقي سوبر ماركت؟		وين بقدر الاقي سوبرماركت؟
19475	corpus-6-test-corpus-26-train	MSA	إنه غالي الثمن إلى حد ما . ألا يمكنك منحي خصماً ؟	هاد غالي شوي. بتقدر تعطيني خصم؟	هاد غالي شوي. بتقدر تعطيني خصم؟		هاد كثير غالي. ما فيك تعطيني شوية خصم؟	تمنحني	تعطيني
19479	corpus-6-test-corpus-26-train	MSA	كم محطة قبل التحويل ؟	كم عدد المحطات لعند ما أبدل؟	كم عدد المحطات لعند ما أبدل؟		كم محطة قبل الدوار؟	تحويل	دوار
19490	corpus-6-test-corpus-26-train	MSA	لقد سرق ذلك الرجل كيس نقودي .	هاد الرجال سرق محفظتي.	هاد الرجال سرق محفظتي.		هذاك الزلمة سرق صرة المصاري تاعتي.	رجل	زلمة	نقود	مصاري
19494	corpus-6-test-corpus-26-train	MSA	حبوب عسر الهضم تختلف عن حبوب ألم المعدة ، أليس كذلك ؟	حبوب الهضم وحبوب وجع المعدة مختلفين، صح؟	حبوب الهضم وحبوب وجع المعدة مختلفين، صح؟		حبوب عسر الهضم بتختلف عن حبوب وجع المعدة، مش هيك؟	ألم	وجع
19497	corpus-6-test-corpus-26-test	MSA	أريد أن أرى الميناء .	بدي أشوف المينا.	بدي أشوف المينا.		بدي اشوف المينا.
19500	corpus-6-test-corpus-26-test	MSA	فكرة جميلة .	فكرة حلوة.	فكرة حلوة.		فكرة حلوة.	جميلة	حلوة
19501	corpus-6-test-corpus-26-train	MSA	كم تستغرق مشياً على الأقدام ؟	كم وقت بدها مشي على الرجلين؟	كم وقت بدها مشي على الرجلين؟		قديش بتوخذ وقت مشي عالجرين؟	الأقدام	الجرين	تستغرق	بتوخذ
19505	corpus-6-test-corpus-26-train	MSA	سآخذ عشرين دب لعبة من أكبر حجم .	راح آخد عشرين من الدباديب أكبر حجم.	راح آخد عشرين من الدباديب أكبر حجم.		راح آخذ عشرين دب لعبة من الحجم الكبير.
19507	corpus-6-test-corpus-26-dev	MSA	ما هو رقم الصراف ؟	شو رقم الكاشير؟	شو رقم الكاشير؟		شو رقم الصراف؟
19508	corpus-6-test-corpus-26-train	MSA	الأمر يسير . سأنظر في دليل الهاتف فحسب .	سهل. أنا بس راح ألقي نظرة على دفتر التلفونات.	سهل. أنا بس راح ألقي نظرة على دفتر التلفونات.		الأمور بسيط. رح أشوف بدليل التلفون بس.	يسير	بسيط	أنظر	أشوف
19509	corpus-6-test-corpus-26-dev	MSA	هل لديك غرف أكبر ؟	عندك أي غرف أكبر؟	عندك أي غرف أكبر؟		عندك غرف أكبر؟
19547	corpus-6-test-corpus-26-train	MSA	كم فاتورة الحساب ؟	كم طلعت فاتورتي؟	كم طلعت فاتورتي؟		قديش الفاتورة ؟
19548	corpus-6-test-corpus-26-train	MSA	أود الإقامة بهذه الغرفة ليلة واحدة أخرى .	بدي أضل بهاي الغرفة لكمان ليلة وحدة.	بدي أضل بهاي الغرفة لكمان ليلة وحدة.		بدي أظل بهاي الغرفة ليلة ثانية.
19560	corpus-6-test-corpus-26-train	MSA	معذرة . ولكني أريد تسليم تقرير السرقة .	عفواً، بدي اسلم تقرير السرقة.	عفواً، بدي اسلم تقرير السرقة.		معلش، بس بدي أسلم تقرير السرقة.	معذرة	معلش
19572	corpus-6-test-corpus-26-train	MSA	حسنا ، الأمر يتوقف على وسيلة المواصلات التي تأخذها . هل ستذهب بالحافلة أم الطائرة ؟	طيب، هاد بعتمد على نوع المواصلات اللي رح تاخده. إنت رايح بالباص وإلا بالطيارة؟	طيب، هاد بعتمد على نوع المواصلات اللي رح تاخده. إنت رايح بالباص وإلا بالطيارة؟		ماشي، الأمور بتعتمد على الطريقة اللي بتروح فيها. رايح بالباص ولا الطيارة؟	طائرة	طيارة	وسيلة	طريقة
19578	corpus-6-test-corpus-26-train	MSA	هل تمانع في جلوسي هنا ؟	بتمانع إزا قعدت هون؟	بتمانع إزا قعدت هون؟		بتمانع لو اقعد هون؟	جلس	قعد
19581	corpus-6-test-corpus-26-train	MSA	هل يمكنني أن أرسل أي ميل واحد فقط قيمته دولار .	بقدر أبعت إيميل واحد بس بدولار؟	بقدر أبعت إيميل واحد بس بدولار؟		بقدر أبعث أي ميل واحد تكلفته بس دولر؟	قيمته	تكلفته	دولار	دولر
19589	corpus-6-test-corpus-26-train	MSA	أجل ، من فضلك أرسله إلى الغرفة اثنا عشر أربعة وثلاثون .	اه، لو سمحت إبعته فوق على غرفة طنعش أربعة وتلتين.	اه، لو سمحت إبعته فوق على غرفة طنعش أربعة وتلتين.		أيوه، لو سمحت وديه على الغرفة اثنعش أربعة وثلاثين.	أرسله	وديه
19610	corpus-6-test-corpus-26-dev	MSA	املأ استمارة التسجيل هذه , من فضلك .	عبي نموذج التسجيل هاد، لو سمحت.	عبي نموذج التسجيل هاد، لو سمحت.		عبي هاي الاستمارة, لو سمحت.	املأ	عبي
19617	corpus-6-test-corpus-26-test	MSA	أريد تذكرتين ذهاب وعودة إلى أكسفورد .	بدي تذكرتين روحة رجعة على أكسفورد.	بدي تذكرتين روحة رجعة على أكسفورد.		بدي تذكرتين روحة رجعة على أكسفورد.
19619	corpus-6-test-corpus-26-train	MSA	متى يتعين على الوصول إلى المطار ؟	بأي وقت أنا لازم آجي على المطار؟	بأي وقت أنا لازم آجي على المطار؟		متى لازم أكون بالمطار؟	يتعين	لازم
19620	corpus-6-test-corpus-26-train	MSA	هذه السرعة بطيئة .	هاد بطيئ.	هاد بطيئ.		هاي السرعة بطيئة.
19623	corpus-6-test-corpus-26-train	MSA	أين يمكنني طباعة الفيلم ؟	وين بقدر أحمض فيلم؟	وين بقدر أحمض فيلم؟		وين بقدر أطبع الفلم؟	فيلم	فلم
19643	corpus-6-test-corpus-26-test	MSA	كلا ، من فضلك لا تفعل ذلك هلا ادخرت أسئلتك حتى نهاية حديثي ، لحين طلبها .	لأ، لو سمحت لأ. ممكن تحتفظ باسئلتك لعند ما أخلص كلامي، متى سألت عنهم؟	لأ، لو سمحت لأ. ممكن تحتفظ باسئلتك لعند ما أخلص كلامي، متى سألت عنهم؟		لا، لو سمحت لا تساوي هيك احتفظ بأسئلتك لبعد ما اخلص حكيي، لما اطلبهن منك.	حين	لما	ادخر	احتفظ
19648	corpus-6-test-corpus-26-dev	MSA	أريد مقعداً جيداً .	بدي مقعد منيح.	بدي مقعد منيح.		بدي مقعد زين.
19649	corpus-6-test-corpus-26-train	MSA	آسف الحمام به عطل . أحتاج للمساعدة .	آسف الحمام ما بشتغل. بدي مساعدة.	آسف الحمام ما بشتغل. بدي مساعدة.		آسف، الحمام فيه عطل. بحتاج للمساعدة.	به	فيه
19651	corpus-6-test-corpus-26-test	MSA	ليس به صعوبة أو غموض .	ما فيه ولا إشي صعب ولا إشي غامض.	ما فيه ولا إشي صعب ولا إشي غامض.		ما فيه صعوبة أو غموض.
19654	corpus-6-test-corpus-26-train	MSA	سأذهب بك على مقعدك . من هنا ، من فضلك .	راح أوصلك لمقعدك. من هون ، لو سمحت.	راح أوصلك لمقعدك. من هون ، لو سمحت.		راح اوديك على كرسيك. من هون، لو سمحت.
19656	corpus-6-test-corpus-26-train	MSA	معذرة ، هل يسعني أن أتوجه إليك بسؤال ؟	عفواً، ممكن اسألك سؤال؟	عفواً، ممكن اسألك سؤال؟		معلش، بقدر أوجهلك سؤال؟	أتوجه	أوجه	يسعني	بقدر
19666	corpus-6-test-corpus-26-train	MSA	أعتقد ذلك .	أنا بأمن بهاد.	أنا بأمن بهاد.		بظن هيك .	ذلك	هيك
19675	corpus-6-test-corpus-26-train	MSA	أهلا . فرصة سعيدة .	أهلاً. إنبسطت بمعرفتك.	أهلاً. إنبسطت بمعرفتك.		مرحبا. فرصة طيبة.
19691	corpus-6-test-corpus-26-train	MSA	أريد فحص هذه الحقائب المتجه إلى طوكيو , من فضلك .	بدي أفحص هاي الشنط المتجهه لطوكيو، لو سمحت.	بدي أفحص هاي الشنط المتجهه لطوكيو، لو سمحت.		بدي اتفقد هالشناتي اللي رايحة لطوكيو، لو سمحت.	افحص	اتفقد
19694	corpus-6-test-corpus-26-train	MSA	هل يمكنك أن تريني حجماً أكبر بقليل ؟	ممكن تورجيني واحد أكبر شوي؟	ممكن تورجيني واحد أكبر شوي؟		ممكن توريني سايز اكبر شوي؟	قليل	شوي
19703	corpus-6-test-corpus-26-train	MSA	أظن أن الملابس المصنوعة في اليابان قد جرى تفصيلها على نحو أفضل بالتأكيد .	بتوقع إنه ملابس الصناعة اليابانية من دون شك مخيطة أحسن خياطة.	بتوقع إنه ملابس الصناعة اليابانية من دون شك مخيطة أحسن خياطة.		بتوقع انو الأواعي اللي صنعت في اليابان تفصلت بطريقة أحسن أكيد.	ملابس	أواعي	نحو	طريقة
19715	corpus-6-test-corpus-26-train	MSA	الأجدر بك أن تكف عن ذلك .	الأحسنلك كان تستسلم.	الأحسنلك كان تستسلم.		أحسنلك تبطل هالاشي.	تكف	تبطل	أجدر	أحسن
19716	corpus-6-test-corpus-26-dev	MSA	أعد ذلك , من فضلك .	عيدها مرة تانية لو سمحت.	عيدها مرة تانية لو سمحت.		عيدها، لو سمحت.	أعد	عيد
19722	corpus-6-test-corpus-26-train	MSA	هل يمكنك تسجيل العنوان ورقم الهاتف من أجلي ، من فضلك ؟	ممكن تكتبلي العنوان ورقم التلفون، لو سمحت؟	ممكن تكتبلي العنوان ورقم التلفون، لو سمحت؟		ممكن تسجلي العنوان ورقم التلفون عشاني، لو سمحت؟	من أجلي	عشاني
19726	corpus-6-test-corpus-26-train	MSA	هل بها جهاز تدفئة ؟	هاد مسخن؟	هاد مسخن؟		بيها جهاز تدفئة؟	بها	بيها
19732	corpus-6-test-corpus-26-train	MSA	من أي المطارات سأغادر ؟	أي مطار راح نطلع منه؟	أي مطار راح نطلع منه؟		من أي مطار رح أطلع؟	أغادر	أطلع
19733	corpus-6-test-corpus-26-train	MSA	ألم تتلق الاستمارة بالطائرة ؟	ما استلمت النموذج في الطيارة؟	ما استلمت النموذج في الطيارة؟		ما أخذت الاستمارة بالطيارة؟	تتلق	اخذت
19735	corpus-6-test-corpus-26-train	MSA	أريد مكواة .	بدي مكواية.	بدي مكواية.		بدي مكوى.	مكواة	مكوى
19752	corpus-6-test-corpus-26-dev	MSA	لقد بلغ ثمانية وثلاثين دولاراً إجمالا .	بيطلعوا تمنية وتلاتين دولار كلهم مع بعض.	بيطلعوا تمنية وتلاتين دولار كلهم مع بعض.		صار ثمانية وثلاثين دولر كله.	إجمال	كله
19754	corpus-6-test-corpus-26-train	MSA	شكراً على إدلائك بأفكارك الفريدة معنا .	شكراً على المشاركة بأفكارك المميزة معنا.	شكراً على المشاركة بأفكارك المميزة معنا.		مشكور على ما وضعتلنا ياه من أفكارك الخاصة.
19755	corpus-6-test-corpus-26-train	MSA	إني أتزلك مرتين في الشهر خلال الموسم .	بروح بتزلج مرتين بالشهر خلال الموسم.	بروح بتزلج مرتين بالشهر خلال الموسم.		أنا بنزلك مرتين بالشهر طول الموسم.
19760	corpus-6-test-corpus-26-train	MSA	ولدت في أول أبريل سنة ألف وتسعمائة وخمس وخمسين .	انولدت بواحد إبريل سنة الف وتسعمية وخمسة وخمسين.	انولدت بواحد إبريل سنة الف وتسعمية وخمسة وخمسين.		انولدت بواحد نيسان سنة ألف وتسعمية وخمس وخمسين.	ولدت	انولدت	أول	واحد
19769	corpus-6-test-corpus-26-test	MSA	هل يمكنني أن أستأجر مضارب راكيت ؟	بقدر استأجر مضارب؟	بقدر استأجر مضارب؟		ممكن استأجر مظارب راكيت؟	مضارب	مظارب
19809	corpus-6-test-corpus-26-train	MSA	أهذه هي الحافلة التي توصل إلى وسط المدينة ؟	هاد الباص الصح لوسط البلد؟	هاد الباص الصح لوسط البلد؟		هاظ هو الباص اللي بوصل لوسط البلد؟
19813	corpus-6-test-corpus-26-train	MSA	بكم هذا العطر ؟	كم سعر هاد العطر؟	كم سعر هاد العطر؟		بقديش هاظا العطر؟
19814	corpus-6-test-corpus-26-train	MSA	ما الغرض منها ؟	لشو هاد؟	لشو هاد؟		شو الهدف منها؟	غرض	هدف
19819	corpus-6-test-corpus-26-train	MSA	أين يمكنني أداء الإجراءات الرسمية ؟	وين بقدر أخلص الاجراءات الرسمية؟	وين بقدر أخلص الاجراءات الرسمية؟		وين ممكن أساوي الإجراءات الرسمية؟	أداء	أساوي
19838	corpus-6-test-corpus-26-dev	MSA	خمسون جنيهاً .	خمسين جنيه.	خمسين جنيه.		خمسين قنيه.	جنيه	قنيه
19840	corpus-6-test-corpus-26-test	MSA	أيشمل ذلك الضريبة ؟	بتضمن الضريبة؟	بتضمن الضريبة؟		هاظ بشمل الضريبة؟
19853	corpus-6-test-corpus-26-test	MSA	وما هي المثانة ؟	شو هي المثانة؟	شو هي المثانة؟		وشو هي المثانة ؟
19862	corpus-6-test-corpus-26-train	MSA	من فضلك استدع سيارة إسعاف .	لو سمحت إتصل بسيارة الإسعاف.	لو سمحت إتصل بسيارة الإسعاف.		من فظلك اطلب سيارة إسعاف.	استدعي	اطلب
19864	corpus-6-test-corpus-26-dev	MSA	سأراهن بثلاثة دولارات على هذا .	راح أراهن بتلاتة دولار على هاد.	راح أراهن بتلاتة دولار على هاد.		راح أراهن بثلاث دولرات على هاظا.	سوف	راح
19871	corpus-6-test-corpus-26-train	MSA	كيف تسير الأمور ؟	كيف ماشية الامور؟	كيف ماشية الامور؟		كيف ماشية الأمور؟	تسير	ماشية
19889	corpus-6-test-corpus-26-train	MSA	ليس ثمة طعام لا أحب أكله .	ما في أكل أنا ما بحبه.	ما في أكل أنا ما بحبه.		ما في أكل ما بحب أوكله.	طعام	أكل
19902	corpus-6-test-corpus-26-train	MSA	عيد الدستور أو " كيمبو كينينبي " عطلة قومية في الثالث من مايو للاحتفال بذكرى وضع الدستور الياباني الحالي .	يوم الدستور أو"كينبو كينينبي" بكون عطلة وطنية بتلاتة خمسة عشان يحتفلوا بذكرى تاسيس الدستور الياباني الحالي.	يوم الدستور أو"كينبو كينينبي" بكون عطلة وطنية بتلاتة خمسة عشان يحتفلوا بذكرى تاسيس الدستور الياباني الحالي.		عيد الدستور او "كيمبو كينينبي" هو عطلة وطنية بتاريخ ثلاثة خمسة للإحتفال بذكرى الدستور الياباني الحالي.	قومية	وطنية
19912	corpus-6-test-corpus-26-train	MSA	هل تشمل هذه الرحلة زيارة لبرج سيرز ؟	هاي الرحلة بتتضمن زيارة لبرج سيرز؟	هاي الرحلة بتتضمن زيارة لبرج سيرز؟		بتشمل هاي الرحلة زيارة لبرج سيرز؟
19923	corpus-6-test-corpus-26-train	MSA	هل ثمة محل قريب لبيع الكتب ؟	في محل كتب بالمنطقة هون؟	في محل كتب بالمنطقة هون؟		في مكتبة بتبيع كتب قريبة؟
19928	corpus-6-test-corpus-26-train	MSA	سأحضر المدرسة الصيفية بجامعة هاواي .	راح أحضر المدرسة الصيفية بجامعة هاواي.	راح أحضر المدرسة الصيفية بجامعة هاواي.		رح أداوم بالمدرسة الصيفية بجامعة هاواي.	أحضر	أداوم
19935	corpus-6-test-corpus-26-train	MSA	ما هذا المكان الذي نمر به الآن ؟	وين عم منمر هلأ؟	وين عم منمر هلأ؟		شو هالمكان اللي بنمر فيه هسا؟	الآن	هسا
19945	corpus-6-test-corpus-26-train	MSA	اثنان كبار وطفل عمره ثلاث سنوات .	اتنين كبار وطفل عمره تلت سنوات.	اتنين كبار وطفل عمره تلت سنوات.		اثنين كبار و ولد عمره ثلاث سنين.	سنوات	سنين	طفل	ولد
[truncated: 1 more rows]
