# Supplementary material for: Exploring prompting for dialectical machine translation: a focus on north Jordanian Arabic
Source: PeerJ journal article supplement (doi:10.7717/peerj-cs.3209), 2025-11-12
Supplement: Code.zip [file Madar_Corpus_26.xlsx]

## Sheet: Sheet1
sentID.BTEC	split	MSA	IrbidDial
5	corpus-6-test-corpus-26-train	هناك ، أمام بيانات السائح تماما .	هناك ، قدام بيانات السايح بالزبط .
9	corpus-6-test-corpus-26-train	لم اسمع بهذا العنوان من قبل بالقرب من هنا .	ما سمعت بهاذ المكان قبل هيك بالمنطقة هون .
11	corpus-6-test-corpus-26-train	استمر في السير في هذا الطريق حتى تجد صيدلية .	كمل مشي بهاذ الطرق لعند ما تلاقي صيدلية .
26	corpus-6-test-corpus-26-train	كم تكلفة الإفطار ؟	بقديش الفطور ؟
27	corpus-6-test-corpus-26-train	كيف أستطيع مساعدتك ؟	كيف بقدر اساعدك ؟
30	corpus-6-test-corpus-26-train	اتجه يسارا عند الناصية الثالثة .	روح يسار من عند الدخلة الثالثة .
50	corpus-6-test-corpus-26-train	هل تحب أن تضع قشدة وسكر في قهوتك ؟	بتحب تحط كريمة و سكر مع قهوتك ؟
64	corpus-6-test-corpus-26-train	هل يمكنكم صرف الشيك ذو المائتي دولار الخاص بي ؟	بتقدروا تصرفولي الشيك أبو الميتين دولر تاعي؟
74	corpus-6-test-corpus-26-train	إذا حدث ذلك ، من فضلك أتصل بي .	اذا صار هيك ، لو سمحت رنلي .
86	corpus-6-test-corpus-26-train	أين المقهى ؟	وين الكوفي شوب ؟
87	corpus-6-test-corpus-26-train	أريد جاكيت للأطفال .	بدي جاكيت للصغار .
91	corpus-6-test-corpus-26-train	حسنا . إنها تتكلف خمسة وثمانون دولارا في البريد العادي وثلاثة دولارات في التوصيل الخاص .	طيب. بتكلف خمسة وثمانين دولر بالبريد العادي وثلاث دولرات بالتوصيل الخاص.
120	corpus-6-test-corpus-26-test	كنت سأشتري هذا إن كنت في مكانك ؟	كنت رح اشتريه لو كنت محلك .
129	corpus-6-test-corpus-26-train	هل لديك أحذية حريمي عند أصابع القدم ؟	عندك كنادر ستاتي مفتوحة من عند الأصابع؟
130	corpus-6-test-corpus-26-train	هل ستواجهني أية صعوبات في الجمارك ؟	راح ألاقي أي صعوبة بالتعامل مع الجمارك؟
140	corpus-6-test-corpus-26-train	لا ، هل لي أن أقترح أخذ غرفة ذات سريرين للاستخدام الفردي ؟ فنحن لدينا واحدة .	لا. ممكن أقترح إني أوخذ غرفة بس لاستخدام فردي ؟ عنا وحدة.
143	corpus-6-test-corpus-26-train	أريد تمويج متقارب لشعري ، من فضلك .	بدي أعمل شعري كيرلي ، لو سمحت.
145	corpus-6-test-corpus-26-train	هي تريد بيرة .	هي بدها بيرا .
157	corpus-6-test-corpus-26-train	صباح الخير . كيف حالك .	صباح الخير . شلونك .
158	corpus-6-test-corpus-26-train	أسف أنني بحاجة إلى أن أطلع على أي مستند لتحديد الهوية .	أسف أني بحاجة إني أشوف اثبات هوية.
169	corpus-6-test-corpus-26-train	أي نوع من الملابس ؟	أي نوع من الأواعي ؟
170	corpus-6-test-corpus-26-train	هذا بارد إلى حد ما . هل يمكن أن تقوم بتسخينه ؟	هاظا بارد شوي. ممكن تسخنه؟
173	corpus-6-test-corpus-26-test	أسف ، هذا المكان محجوز بالفعل .	آسف، هاذ المكان محجوز فعلاً.
176	corpus-6-test-corpus-26-train	أنا بحالة جدية ، لكن هل تمانع في الاتصال بصديق ؟	أنا تمام، بس عندك مانع أرن عصاحبي؟
177	corpus-6-test-corpus-26-test	شكراً ، هذا يكفي .	شكراً ، هاظ بكفي.
184	corpus-6-test-corpus-26-train	من هو أفضل صديق لك ؟	مين أحسن صاحب عندك ؟
187	corpus-6-test-corpus-26-train	يوم الصحة الرياضية هو يوم العاشر من أكتوبر وهو إجازة قومية الغرض منها تحسين صحة المواطنين .	يوم الصحة الرياضية بعشرة عشرة بكون عطلة وطنية عملوه عشان يرفعوا مستوى الصحة عند الناس.
192	corpus-6-test-corpus-26-train	هل تريد أن افحص موتور السيارة ؟	بدك ياني أفحص ماتور السيارة؟
206	corpus-6-test-corpus-26-train	هل لك أن تساعدني في الوصول إلى حقيبتي ؟	ممكن تساعدني ألاقي شنتيتي؟
221	corpus-6-test-corpus-26-train	هل ستقوم بعمل الترتيبات مقدماً ؟	بدك تعمل الترتيبات قبل؟
238	corpus-6-test-corpus-26-train	تقدم إلىّ المساعدة ، شكراً لك .	بتساعدني ، شكراً الك.
261	corpus-6-test-corpus-26-train	عندما تصل هناك أسأل شخص آخر ، من فضلك .	لما توصل هناك، اسأل حدا ثاني، لو سمحت.
280	corpus-6-test-corpus-26-train	أريد الامتداد أربع وعشرون ، من فضلك .	حاب أمدد اربعة وعشرين، لو سمحت.
285	corpus-6-test-corpus-26-train	تفضل هذان دولاران . احتفظ بالباقي .	تفظل هي دولرين. خلي الباقي إلك.
315	corpus-6-test-corpus-26-train	واحد هامبرجر وواحد شيز برجر ، من فضلك .	واحد همبرقر وواحد شيز برقر، لو سمحت.
319	corpus-6-test-corpus-26-train	كم تتقاضى لتطبيع صور الفيلم ؟	قديش بتوخذ عشان تطبع صور الفلم؟
320	corpus-6-test-corpus-26-train	كلا منا يريد أن يحاسب على وجبته .	إحنا كل واحد بدو يدفع عن أكلته.
326	corpus-6-test-corpus-26-train	المكان كان على كرسي في البهو .	المكان كان عكرسي باللوبي.
333	corpus-6-test-corpus-26-test	من فضلك غير هذه الينات إلى جنيهات .	لو سمحت اصرفلي هظول من ين لقنيه.
346	corpus-6-test-corpus-26-train	أريد قاموس جيب ، من فضلك .	بدي قاموس بنحط بالجيبة ، لو سمحت.
360	corpus-6-test-corpus-26-train	لشخصين عند الساعة السابعة , الاسم وتاناب .	لشخصين الساعة سبعة. الاسم وتاناب.
368	corpus-6-test-corpus-26-train	ساعتي . كانت ساعة سيكو رقمية .	ساعتي. كانت الكترونية من سيكو.
370	corpus-6-test-corpus-26-train	يسعدنا أن نقدم لك الشراب الذي تريده متبوعاً بالغداء . دليل كامل بالمشروبات التي نقدمها على رحلتنا موجودة في دليل المعلومات الخاص بمجلتنا .	بسعدنا إنه نقدملك العصير اللي بتختاره وبيلحقه الغدا . منوفر قائمة كاملة من الشراب في هاي الرحلة موجودة بقسم المعلومات تاع مجلتنا.
373	corpus-6-test-corpus-26-test	هل تعيش بالقرب من هنا ؟	انت عايش قريب من هون؟
375	corpus-6-test-corpus-26-train	أين محل الهدايا ؟	وين محل الهدايا؟
386	corpus-6-test-corpus-26-test	أنا على الطريق الرئيسي بجانب خليج موروا .	أني عالطريق العام بجنب خليج موروا.
391	corpus-6-test-corpus-26-train	أريد منبه ، من فضلك .	بدي منبه، لو سمحت.
398	corpus-6-test-corpus-26-dev	بالمناسبة ، اسمي هيروش إيجيما .	بالمناسبة، اسمي هيروشي ايجيما.
401	corpus-6-test-corpus-26-dev	هذا القطار يتوقف في لاك فورست , أليس كذلك ؟	هاذ القطار بوقف عند بحيرة الغابة. مش هيك؟
ه	corpus-6-test-corpus-26-train	معظم اليابانيين يأكلون الأخطبوط والحبار .	أغلب اليبانيين بوكلوا الخطبوط والحبار .
416	corpus-6-test-corpus-26-train	هل يمكنني الحصول على تذكرتين درجة ثانية لشيكاغوا , من فضلك ؟	ممكن أحجز تذكرتين لشيكاغو من الدرجة الثانية، لو سمحت؟
419	corpus-6-test-corpus-26-train	لقد ذهبت إلى نيويورك .	أني رحت على نيويورك.
423	corpus-6-test-corpus-26-train	ما هو رقم الرحلة الجوية ؟	شو رقم رحلة الطيران؟
442	corpus-6-test-corpus-26-test	واحد لنيويورك ، من فضلك .	واحد لنيويورك، إذا سمحت.
446	corpus-6-test-corpus-26-train	لعدة أيام قليلة .	لكم يوم بس.
447	corpus-6-test-corpus-26-train	الثاني من على اليسار .	الثاني عالشمال .
471	corpus-6-test-corpus-26-dev	هذا الكارت , حسناً ؟	هاذ الكرت ، طيب؟
488	corpus-6-test-corpus-26-train	هل هذا مكتب الاستقبال ؟ هل يوجد عيادة قريبة ؟	هاظ مكتب الاستقبال؟ في عيادة قريبة من هون؟
493	corpus-6-test-corpus-26-train	هل عشرة دولارات ستكون كافية للذهب بالتاكسي ؟	بكفي عشر دولرات للروحة بالتكسي؟
503	corpus-6-test-corpus-26-train	أنه ذو مذاق غريب .	طعمه غريب.
512	corpus-6-test-corpus-26-train	نعم . انتظر , سوف احضر لك واحدة .	طيب. استنى، راح أجيبلك وحدة.
516	corpus-6-test-corpus-26-train	نصف زجاجة , من فضلك .	نص قنينة ، لو سمحت.
540	corpus-6-test-corpus-26-train	ليس تماماً . فقط شيء ما غير غالي الثمن .	مش هيك. بس إشي مش غالي.
548	corpus-6-test-corpus-26-train	هل تبحث عن شيء ما ؟	إنت بدّور على اشي؟
551	corpus-6-test-corpus-26-train	أربع ليالي .	أربع ليالي.
553	corpus-6-test-corpus-26-train	أريد بعض الجوارب الرجالي .	بدي شوية جرابات رجالي.
565	corpus-6-test-corpus-26-train	هل تستطيع أن تخفض سعرها لوجود بعض البقع بها ؟	بتقدر ترخصها لأنه في عليها شوية بقع؟
571	corpus-6-test-corpus-26-train	ارتطم بي شخص وبعد ذلك اكتشفت أن محفظتي قد سرقت .	في حدا خبط فيّ . وبعدها لاحظت أنه جزداني انسرق.
599	corpus-6-test-corpus-26-train	أنا غير متأكد إذا كنت قد حزمت ملابس كافية لرحلة مدتها ثلاثة أيام .	أنا مش متأكد اذا جهزت وعية بتكفيني لرحلة مدتها ثلاث أيام.
612	corpus-6-test-corpus-26-train	حسناً ، أود أن أجرب النبيذ الأبيض .	طيب، انا بدي أجرب العرق .
631	corpus-6-test-corpus-26-train	إذا سأل أحد عني فأخبره بأني سوف أكون بالمقهى .	اذا حدا سأل عني، قله اني رح أكون بالكوفي شوب.
632	corpus-6-test-corpus-26-train	أنا متأكد أني وضعتها بالجيب الداخلي للمعطف .	أنا متأكد انه حطيتها بالجيبة الداخلية للكبوت.
641	corpus-6-test-corpus-26-test	هل يمكن أن تخبرني باسم ورقم الطرف الذي تريد الاتصال به ؟	ممكن تعطيني اسم ورقم الجهة اللي بدك تتصل فيها؟
643	corpus-6-test-corpus-26-train	هل ستدفع لي شركة الطيران لشراء بعض الاحتياجات الشخصية الأساسية ؟	رح تدفعلي شركة الطيران عشان أشتري شوية أشياء شخصية ضرورية؟
650	corpus-6-test-corpus-26-train	أرغب في غرفة بحمام .	بدي غرفة بحمام.
652	corpus-6-test-corpus-26-dev	لم يخرج من الماكينة شيء .	ما طلع من الماكينة إشي.
667	corpus-6-test-corpus-26-test	كان يفترض أن تسافر على الطائرة رقم ثمانية اثنان صفر التي أقلعت منذ خمس عشرة دقيقة . حسنا . بإمكاني تنظيم رحلة أخرى .	كان المفروض تسافر بالطيارة رقم ثمنية عشرين ، اللي طلعت من خمسطعشر دقيقة. على العموم. أني بقدر أرتبلك رحلة ثانية.
673	corpus-6-test-corpus-26-train	شخص ما فتح الطرد الخاص بي .	في حد فتح الطرد تبعي.
679	corpus-6-test-corpus-26-test	آوه , الأمر بسيط ، هل أنت هنا ، على أية حال .	أووه، شغلة بسيطة. انت هون، على كل حال.
680	corpus-6-test-corpus-26-train	شركة الخطوط الجوية اليابانية ، طائرة رقم واحد اثنان ثلاثة .	شركة الخطوط الجوية اليابانية، رحلة الطيران رقم واحد اثنين ثلاثة.
681	corpus-6-test-corpus-26-train	أرغب في شراء شامبو .	أنا بدي أشتري شامبو.
683	corpus-6-test-corpus-26-train	هل بإمكانك أن تخبرني متى نصل إلى مجمع الخدمات العامة .	بتقدر تحكيلي أميت رح نوصل على مجمع الخدمات العامة .
688	corpus-6-test-corpus-26-train	ـ أين أقرب محل جزارة ؟	وين أقرب لحام؟
703	corpus-6-test-corpus-26-train	نرغب في أن نقيم أربع ليالي بدءاً من أول أغسطس .	إحنا حابين نظل أربع ليالي من واحد ثمنية.
708	corpus-6-test-corpus-26-train	ما اسم هذه الوردة ؟	شو اسم هاي الوردة؟
719	corpus-6-test-corpus-26-train	الخامس عشر من سبتمبر يوم احترام المسنين .	خمسطعش تسعة هو يوم احترام المسنين.
723	corpus-6-test-corpus-26-train	ليس هناك صابون في حجرتي .	فيش صابون بغرفتي .
741	corpus-6-test-corpus-26-dev	عندك أية شيء يمكن أن أتعاطه للطفح الجلدي ؟	عندك أي اشي ممكن آخذه عشان هاذ الطفح الجلدي؟
742	corpus-6-test-corpus-26-train	هل يمكنك أن تغير الصياغة طبقاً لما قلته للتو ؟	بتقدر تغير الصيغة مثل ما قلت هسا؟
761	corpus-6-test-corpus-26-test	كم ستستغرق لكي تطلب ؟	قديش بدك يعني عشان تطلب؟
773	corpus-6-test-corpus-26-train	لا أستطيع أن أفعل ذلك , لكني سوف أضعها في الحقيبة لك .	ما بقدر اعمل هيك , بس رح احطها بالشنتة الك .
777	corpus-6-test-corpus-26-train	كم تستغرق حتى تصبح متاحة .	قديش بدها حتى تصير فاظية .
786	corpus-6-test-corpus-26-train	أين الاستعلامات الرياضية ؟	وين الاستعلامات الرياضة؟
787	corpus-6-test-corpus-26-train	هذا المقاس ، الذي تسميه المقاس العادي ، سوف تجده هنا .	هاذ الحجم ، اللي بتسميه حجم عادي، راح تلاقيه هون .
793	corpus-6-test-corpus-26-test	أين ستنتهي الجولة ، ومتى ؟	وين راح تخلص الرحلة، و أميت؟
848	corpus-6-test-corpus-26-train	من أي مكان يمكنني أن أغير القطار الذي يوصلني إلى إدنبره ؟	منين بقدر أغير القطار اللي بوصلني لادنبرة؟
855	corpus-6-test-corpus-26-train	أود أن أضع ذلك في صندوق ودائع آمن .	أني بدي أحط هاظ بصندوق أمانات يكون آمن.
859	corpus-6-test-corpus-26-train	أين يمكنني تغير نقودي ؟	وين بقدر أصرف مصاريي؟
897	corpus-6-test-corpus-26-train	هل يمكننا ترك أشياءنا ما عدا الأشياء القيمة في الحافلة ؟	بنقدر نخلي اغراضنا هون، ماعيدا الأشياء الغالية، في الباص؟
902	corpus-6-test-corpus-26-train	أتساءل عن هذه الرسوم الزائدة على فاتورتي .	أني مستغرب ليش كل هاي الرسوم الزيادة عفاتورتي.
917	corpus-6-test-corpus-26-train	أنا سوف أدفع خمسون دولاراً .	أناي رح أدفع خمسين دولر.
941	corpus-6-test-corpus-26-train	الآن أعرف . ماذا كان الخطأ . ؟	هسا عرفت . شو اللي كان غلط . ؟
957	corpus-6-test-corpus-26-dev	أكيدا التي تتحدث معك ، أنا عندي حجز مائدة في تمام الساعة السادسة والثلث هذا المساء . ولكني آسفة لأني سأصل متأخرة نصف ساعة .	أكيدا يلي بتحكي. عندي حجز طاولة عالساعة ستة و ثلث المسا. بس آسفة لإني رح أوصل متأخرة نص ساعة.
1003	corpus-6-test-corpus-26-train	كم أوقية من العطر أستطيع الحصول عليه من غير رسوم ؟	كم وقية من العطر بقدر أوخذها بدون رسوم ؟
1007	corpus-6-test-corpus-26-train	فقط سياحة .	بس للسياحة.
1010	corpus-6-test-corpus-26-train	هذا جيد , من فضلك وقع عليهم . كيف تريدها ؟	هاذ تمام، لو سمحت وقعهم. كيف بتحبها تكون؟
1023	corpus-6-test-corpus-26-test	هل لا زال لديكم مقاعد لعرض الليلة ؟	ظل في عندكم محلات لعرض الليلة؟
1036	corpus-6-test-corpus-26-train	أود الحصول على واحدة كبيرة .	أني بدي وحدة كبيرة.
1037	corpus-6-test-corpus-26-dev	لقد نمت و لم أتيقظ حين رن منبه السادسة و النصف .	نمت و ما صحيت ع منبه الساعة ستة ونص.
1038	corpus-6-test-corpus-26-train	أنا مصور حر .	أني مصور حر.
1047	corpus-6-test-corpus-26-train	يستطيع الصرافون أن يغيروا دولاراتك من أجل بقشيش الكازينو . هل نذهب ؟	السمسارين بقدروا يصرفولك الدولرات عشان بخشيش الكازينو. بصير نروح؟
1056	corpus-6-test-corpus-26-dev	لدينا نحو ثلاثون نوعاً من زيوت الاستحمام .	عنا حوالي ثلاثين نوع من زيوت الحمام.
1062	corpus-6-test-corpus-26-train	سوف أحضر لك العرض الأسبوع القادم .	بدي اجهزلك العرض الاسبوع الجاي.
1074	corpus-6-test-corpus-26-train	شكراُ لك . كم تكلفة هذا القفاز ؟	شكراً الك. قديش سعر هاي الكفوف؟
1098	corpus-6-test-corpus-26-train	علىّ أن أذهب ، سأتصل بك لاحقاً .	أني لازم أروح. رح أحكي معك بعدين.
1100	corpus-6-test-corpus-26-train	أريد بعض الحفاضات التى يمكن التخلص منها بعد الاستعمال .	بدي حفاظات للاستعمال مرة وحدة.
1122	corpus-6-test-corpus-26-train	أين نشأت سمكات الفراش هذه ؟	من وين جاية سمكات الفراش هاي؟
1124	corpus-6-test-corpus-26-train	هل لك أن تغيرهم إلى دولارات من فضلك ؟	ممكن تحولي اياهم لدولارات، لو سمحت؟
1139	corpus-6-test-corpus-26-train	نحن محظوظون جداً . لديهم واحدة مقاس أربعة فى متجر ألامونا .	إحنا كثير محظوظين. في عندهم وحدة مقاسها أربعة بمحل ألاموانا.
1146	corpus-6-test-corpus-26-train	هل هناك سيارة ليموزين ؟	في سيارة ليموزين؟
1163	corpus-6-test-corpus-26-dev	هل لى أن أتلقى اتصالاً يوقظنى فى الخامسة و النصف من صباح الغد ؟	ممكن ترنلي مكالمة تصحيني فيها الساعة خمسة ونص بكرا الصبح؟
1165	corpus-6-test-corpus-26-train	أُفضلُ حجرة هادئة .	بفظل غرفة هادية.
1167	corpus-6-test-corpus-26-train	أريد مزيلا لطلاء الأظافر .	بدي أسيتون للمناكير.
1183	corpus-6-test-corpus-26-train	أريد بطارية .	بدي بطارية.
1193	corpus-6-test-corpus-26-test	هل هناك فرقة موسيقية أم دي جي ؟	في فرقة موسيقية ولا ديجيه؟
1194	corpus-6-test-corpus-26-train	هل أستطيع تأجير أداة للتنفس أثناء السباحة ؟	بقدر أستأجر شغلة للتنفس خلال السباحة؟
1199	corpus-6-test-corpus-26-dev	أود حجز غرفة لأربع ليالى ابتداء من الثانى و العشرين من ديسمبر .	أنا بدي أحجز غرفة لمدة أربع ليالي من اثنين وعشرين إثنعش.
1212	corpus-6-test-corpus-26-train	هل هذه الحقيبة مناسبة لكل حالات الطقس ؟	هاي الشنتة بتناسب كل حالات الجو؟
1213	corpus-6-test-corpus-26-train	أريد كعكة محلاة من فضلك .	بدي كوكيز لو سمحت.
1218	corpus-6-test-corpus-26-train	أريد تأجير سلاح آلى لمدة يومين .	بدي استأجر سلاح أوتوماتيك ليومين.
1224	corpus-6-test-corpus-26-train	لم أدرك الرحلة رقم عشرون المتجهة إلى سان فرانسيسكو .	ما لحقت الرحلة رقم عشرين اللي رايحة عسان فرانسيسكو.
1234	corpus-6-test-corpus-26-train	كم سأدفع للوصول إلى المطار ؟	قديش رح أدفع حتى اوصل للمطار؟
1235	corpus-6-test-corpus-26-train	هذا جيد . متى هو ؟	هيك تمام. متى رح يكون؟
1276	corpus-6-test-corpus-26-train	كم عمر ابنتك ؟	قديش عمر بنتك؟
1312	corpus-6-test-corpus-26-train	هل يمكن أن تدلني على بعض الفنادق الرخيصة والنظيفة ؟	بصير ادلني عبعض الفنادق الرخيصة والنظيفة؟
1321	corpus-6-test-corpus-26-train	يمكننا ان نحجز لك غرفة مريحة في قلعة قديمة بالقرب من نادي جولف شهير .	بنقدر نحجزلك غرفة مريحة بقلعة قديمة قريبة من نادي جولف مشهور.
1329	corpus-6-test-corpus-26-train	ارشح ذلك لأنه مائة في المائة مصنوع من مكونات طبيعية .	أني بنصحك بهاذ لأنه مصنوع من مواد طبيعية مية بالمية.
1361	corpus-6-test-corpus-26-dev	هل يتوقف القطار في برايتون ؟	بوقف القطار عند برايتون؟
1369	corpus-6-test-corpus-26-train	هل من الممكن أن تخبرني أين أستطيع أن أحصل على تاكسي ؟	بتقدر تحكيلي من وين بلاقي تكسي؟
1375	corpus-6-test-corpus-26-train	تذكرتين درجة ثانية من فضلك .	تذكرتين من الدرجة الثانية لو سمحت.
1384	corpus-6-test-corpus-26-train	أود أن أرسل فاكس .	بدي أبعث فاكس.
1394	corpus-6-test-corpus-26-train	أريد مكواة سفر .	بدي مكوى للسفر.
1396	corpus-6-test-corpus-26-train	أيمكنني أن أقدم لك أي شيء ؟	بقدر أضيفك أي اشي؟
1404	corpus-6-test-corpus-26-train	أخشى أن أسأل ، لكن ماذا تعني ؟	بخاف اسأل، بس شو قصدك؟
1418	corpus-6-test-corpus-26-train	أريد الشخص الذي يعد وثائق عادية في حجم ورقة الخطاب بدون الحاجة إلى طيهم .	بدي الشخص اللي بعمل الوثائق اللي بحجم الورق العادي بدون ما يظطر يثنيهم.
1433	corpus-6-test-corpus-26-test	نعم ، لكن ليس قويا جدا .	اه ، بس مش قوي كثير.
1434	corpus-6-test-corpus-26-train	أنا شديد الحساسية للقطط .	أني بتحسس كثير من البسس.
1436	corpus-6-test-corpus-26-train	نعم , لا بد أن يكون عندك رخصة قيادة ، ولا بد أن تحصل على رخصة من لجنة التاكسي والليموزين .	اه، لازم يكون عندك رخصة سواقة، ولازم يكون توخذ رخصة من لجنة التكسي و ليموزين.
1462	corpus-6-test-corpus-26-train	استمر يا سيدي .	كمل يا سيدي .
1465	corpus-6-test-corpus-26-test	يبدوا أنني غير قادر على الحصول على الماء الساخن .	شكله مش قادر يجيب ميّة ساخنة.
1474	corpus-6-test-corpus-26-train	أود أن أحجز غرفة لهذه الليلة .	بدي أحجز غرفة لهاي الليلة.
1492	corpus-6-test-corpus-26-train	لا ، إنها لا تشمل الضريبة ومصاريف الخدمة .	لا، هي ما بتشمل الضريبة ومصاريف الخدمة.
1506	corpus-6-test-corpus-26-train	هل تريد أن تذهب للتسوق معي بعد الظهر ؟	بتحب تيجي معي نتسوق بعد الظهر؟
1508	corpus-6-test-corpus-26-test	هيه ، هذا فستان جميل حقا .	مرحبا ، هاذا فعلا فسطان حلو.
1519	corpus-6-test-corpus-26-train	الآن ، مكالمتك ردت . تفضل من فضلك .	حاليا، مكالمتك رجعت. تفضل لو سمحت.
1525	corpus-6-test-corpus-26-train	ما رقم البوابة ؟	شو رقم البوابة؟
1539	corpus-6-test-corpus-26-train	ما التذكار الخاص بهاواي ؟	شو هو التذكار الخاص بهاواي؟
1556	corpus-6-test-corpus-26-train	أيمكنني أن أذهب هناك بمترو الأنفاق ؟	بقدر أروح هناك بالمترو؟
1560	corpus-6-test-corpus-26-train	أريد مجفف .	بدي سشوار.
1562	corpus-6-test-corpus-26-train	هل نذهب إلى أي مكان متحدثين مثل ذلك ؟	راح نظل نحكي هيك وين ما نروح؟
1585	corpus-6-test-corpus-26-train	أنا من النرويج .	أني من النرويج.
1603	corpus-6-test-corpus-26-dev	من ثمانية إلى اثنى عشر من فضلك .	من ثمانية ل اثنعش لو سمحت.
1619	corpus-6-test-corpus-26-train	بالتأكيد . دعني أراها . أظن أن المرجان جرحك .	أكيد. خليني أشوفها . بظن المرجان جرحك.
1620	corpus-6-test-corpus-26-train	لقط للتأكيد ، إعطني رقم المسئول .	بس للاحتياط، أعطيني رقم الشخص المسؤول.
1622	corpus-6-test-corpus-26-train	هل هناك طريق حر ؟	في طريق فرعي؟
1630	corpus-6-test-corpus-26-train	لماذا لم يأت إلى الحفلة أمس ؟	ليش ما اجى على الحفلة امبارح؟
1637	corpus-6-test-corpus-26-train	لقد كان هناك حادث مرور .	كان في حادث سير.
1650	corpus-6-test-corpus-26-train	آسف , لقد اتصلت بالرقم الخطأ .	آسف، أني اتصلت بالرقم الغلط.
1653	corpus-6-test-corpus-26-test	من فضلك ادخل رقم هويتك الشخصية .	لو سمحت دخّل رقم هويتك .
1663	corpus-6-test-corpus-26-dev	لا أستطيع ضبط اللوحة .	مش قادر أزبط الصورة.
1668	corpus-6-test-corpus-26-train	واحد هامبورجر بالجبن و عصير برتقال , من فضلك .	واحد تشيز برقر وعصير بردقان ، لو سمحت.
1670	corpus-6-test-corpus-26-test	هاك جواز سفري .	هاك جواز السفر تاعي.
1682	corpus-6-test-corpus-26-test	لماذا , شكرا جزيلا . هل أستطيع الارتقاء للقمة ؟	ليش، شكراً كثير الك. بقدر اطلع للقمة؟
1702	corpus-6-test-corpus-26-train	هل أستطيع أن الحصول علي تذكرتان للمسرحية الغنائية الجمعة القادمة .	بقدر أوخذ تذكرتين للحفلة الموسيقية الجمعة الجاي؟
1718	corpus-6-test-corpus-26-train	راكب آخر هناك قال انهم يستطيعون أن يبدلوا مقاعدهم معك .	في راكب ثاني هناك قال انه بقدروا يبدلوا الكراسي معك.
1754	corpus-6-test-corpus-26-train	هل أستطيع تمديد إقامتي ؟	بقدر أمدد إقامتي؟
1766	corpus-6-test-corpus-26-train	يا صاح , أتعرف أي مكان يستحق الرؤية قريبا من هنا ؟	أخوي، بتعرف أي مكان محرز الشوفة قريب من هون؟
1768	corpus-6-test-corpus-26-dev	لا , أريد أن استأجر نصف مجموعة من المضارب وزوجا من الأحذية .	لا، بدي استأجر نص مجموعة من المضارب وجوز بواط.
1782	corpus-6-test-corpus-26-train	هل من الممكن أن تخبرني عندما تعثروا علي الحقيبة الضائعة ؟	ممكن تخبرني بس تلاقوا الشنتة الضايعة؟
1788	corpus-6-test-corpus-26-train	ما اسم هذه المحمية ؟	شو اسم هاي المحمية؟
1791	corpus-6-test-corpus-26-train	أصبت بسحجة .	أني انشخطت.
1792	corpus-6-test-corpus-26-dev	أين يوجد مكان جيد به لمشاهدة الأماكن المهمة ؟	وين في مكان كويس حتى نشوف الاماكن المهمة؟
1800	corpus-6-test-corpus-26-train	هل من الممكن أن احصل علي بعض الفاكهة ؟	ممكن تجيبلي شوية فواكة؟
1834	corpus-6-test-corpus-26-train	هل أستطيع تناول غذائي الآن ؟	ممكن أوكل هسا؟
1837	corpus-6-test-corpus-26-train	أريد أن أستبدل تلك الدولارات .	بدي أصرف هاي الدولرات.
1867	corpus-6-test-corpus-26-train	أحتاج إلى تاكسي . أنا في ساوث ماين ، وليبرتي .	بدي تكسي. أني بساوث ماين ، وليبرتي.
1876	corpus-6-test-corpus-26-dev	بالتأكيد ، هل تريد تسريحة متموجة دائما ؟	أكيد، بدك اياه كيرلي دايما؟
1878	corpus-6-test-corpus-26-train	هذه ليست تفاحة ولكنها خوخة .	هاي مش تفاحة هاي خوخة.
1903	corpus-6-test-corpus-26-train	سوف أعطيك روشتة . خذها إلى الصيدلية .	راح أعطيك الوصفة . خظها عالصيدلية.
1927	corpus-6-test-corpus-26-train	نسافر جواً ثلاث مرات في الأسبوع ، أيام الثلاثاء والجمعة والسبت .	بنسافر بالطيارة ثلث مرات بالأسبوع، الثلاثاء، الجمعة والسبت.
1931	corpus-6-test-corpus-26-dev	هذا سعر مرتفع ، أليس كذلك ؟	هاظا سعره غالي، صح؟
1948	corpus-6-test-corpus-26-train	نعم لدينا هذا ، سوف نجهزها لك .	اه موجود عنا. رح نجهزلك اياه.
1950	corpus-6-test-corpus-26-dev	هل يمكنكم إبقاء أمتعتي لديكم حتى الساعة الثالثة ؟	ممكن تخلولي شنتاتي عندك للساعة ثلاثة؟
1951	corpus-6-test-corpus-26-train	ل , ا أريد فقط الزيارة بدون ميعاد .	لا، أني بس بدي ازوره بدون موعد.
1954	corpus-6-test-corpus-26-dev	هل يمكن أن أحجز سيارة للإيجار من هنا ؟	بقدر احجز سيارة للأجار هون؟
1968	corpus-6-test-corpus-26-train	هل أنت أمريكي ؟	إنت أمريكي؟
1980	corpus-6-test-corpus-26-test	إلى هذا المكان , لو سمحت .	لهاظ المكان، لو سمحت.
1985	corpus-6-test-corpus-26-train	لقد تعطلت سيارتي .	خربت سيارتي .
1988	corpus-6-test-corpus-26-train	أين مظلل العيون ؟	وين الآي شدو؟
1993	corpus-6-test-corpus-26-train	نريد ركناً هادئاً ، إن أمكن .	بدنا زاوية هادية، اذا ممكن.
1997	corpus-6-test-corpus-26-train	هل هذه السيارة الأجرة متاحة ؟	هاي التكسي فاضية؟
1998	corpus-6-test-corpus-26-train	هل هذه محطة قطار سريع ؟	هاي محطة اكسبريس؟
2001	corpus-6-test-corpus-26-train	متى ينبغي أن آتي ؟	متى لازم آجي ؟
2003	corpus-6-test-corpus-26-train	أريد دورقاً صغيراً من الخمر الأبيض .	بدي دورقة صغيرة من العرق.
2005	corpus-6-test-corpus-26-train	آه . هل يمكنني الحصول على وجبتي فيما بعد ؟ أنا أشعر أنني لست على ما يرام الآن .	ممم. ممكن أخد وجبتي بعدين؟ حاسس حالي مش على بعضي هسا.
2025	corpus-6-test-corpus-26-train	بالفعل لدي أخبار . أنا سأتزوج .	فعلياً، عندي أخبار. أنا بدي أجوز.
2033	corpus-6-test-corpus-26-train	بنطلون أخر ؟	بنطلون ثاني؟
2035	corpus-6-test-corpus-26-train	هل يمكنني الحصول على برنامج ؟	بقدر آخذ برنامج؟
2052	corpus-6-test-corpus-26-train	اقتحمت غرفتي الليلة الماضية .	في حدا اقتحم غرفتي مبارح بالليل.
2055	corpus-6-test-corpus-26-train	أرني السمكة التي رأيتها اليوم في كتاب الصور ، من فضلك .	ورجيني السمكة اللي شفتها اليوم بألبوم الصور، لو سمحت.
2083	corpus-6-test-corpus-26-train	انظر التعليمات على علبة الطعام الفارغة .	شوف التعليمات اللي على علبة الأكل الفاضية.
2086	corpus-6-test-corpus-26-train	أريد نقوداً ورقية .	بدي مصاري ورق.
2100	corpus-6-test-corpus-26-test	خطف محفظتي وجرى بعيداً .	سرق جزداني وركظ بعيد.
2119	corpus-6-test-corpus-26-train	أليس لديك دروس تجريبية ؟	ما عندك كورسات تجريبية؟
2147	corpus-6-test-corpus-26-train	أين يمكنني أن أشتري طوابع بريد ؟	من وين بقدر أشتري طوابع بريد؟
2148	corpus-6-test-corpus-26-train	أنا من بريطانيا العظمى .	أني من بريطانيا الكبيرة.
2156	corpus-6-test-corpus-26-train	علي أن أفحص ذلك مع زوجتي .	لازم أشوف الموضوع مع مرتي.
2161	corpus-6-test-corpus-26-train	أريد أن أحصل على تعويض لذلك .	أنا بدي اوخد تعويض عن هاظ.
2179	corpus-6-test-corpus-26-train	يوجد صندوق للهاتف أمام هذا المصرف .	في كشك تليفون قدام هاذ البنك.
2180	corpus-6-test-corpus-26-train	سأصل في التاسع من مارس وأغادر في الرابع عشر .	راح أوصل بتسعة ثلاث وراح أروّح بأربعطعش.
2205	corpus-6-test-corpus-26-train	هذا غال قليلاً ، ألا تعتقد ؟	هاذ غالي شوي، مش شايف هيك؟
2235	corpus-6-test-corpus-26-train	هل لديك كعب ؟	عندك كعب؟
2236	corpus-6-test-corpus-26-train	أين المحطة النهائية للحافلة ؟	وين اخر موقف للباص؟
2238	corpus-6-test-corpus-26-train	هل تريد بالحلويات ؟	بدك حلويات؟
2302	corpus-6-test-corpus-26-train	هل تتحدث ؟	إنت بتسولف؟
2306	corpus-6-test-corpus-26-train	الشيء نفسه لي ، من فضلك .	ونفس الشي إلي ، لو سمحت.
2318	corpus-6-test-corpus-26-train	طلبي لم يأت .	طلبي ما وصل.
2324	corpus-6-test-corpus-26-train	هناك الكثير من الينابيع الحارة .	في كثير ينابيع حارة.
2329	corpus-6-test-corpus-26-train	من فضلك غير خمسين آلاف ين إلى دولارات أمريكية .	لو سمحت اصرف الخمسين ألف ين لدولر أمريكي.
2338	corpus-6-test-corpus-26-train	هذا حسن بالنسبة لي . في الواقع أحب أن أدخن .	هاذ تمام بالنسبة إلي . بصراحة أني بحب أدخن.
2347	corpus-6-test-corpus-26-test	أين يمكنني أن أشتري زلاجات وأحذية ؟	من وين بقدر اشتري زلاجات و أحذية؟
2353	corpus-6-test-corpus-26-dev	هل نسيت مشروباتنا ؟	نسيت عصيرنا؟
2368	corpus-6-test-corpus-26-test	هل يمكن أن ترسلها إلى عنواني في اليابان عن طريق بريد الطرود الدولي وتحصل الثمن من هناك ؟	ممكن توديها على عنواني باليابان عن طريق صفحة الطرود الدولي و توخذ حقه من هناك ؟
2381	corpus-6-test-corpus-26-train	أريد كوباً من الخمر الأحمر .	بدي كاسة واين إحمر.
2389	corpus-6-test-corpus-26-train	فقط إذا كانت ملكك ، سيدي . هاها ، مزحة صغيرة .	بس اذا كانت ملكك ، يا سيدي . ههههههه، هاي مزحة صغيرة.
2401	corpus-6-test-corpus-26-train	بالتأكيد . كيف يمكننا خدمتك ؟	أكيد. كيف منقدر نخدمك؟
2412	corpus-6-test-corpus-26-dev	لدينا بيرة ، وويسكي ، وبراندي ، وجن ، وفودكا ، وخمر .	عنا بيرا، ويسكي، براندي، جن، فوديكا وواين.
2425	corpus-6-test-corpus-26-train	تحقيق شخصية . آه ، هل جواز السفر ينفع ؟	تحقيق شخصية. آه ، جواز السفر بنفع؟
2428	corpus-6-test-corpus-26-train	رقم غرفتي هو ثلاثة ستة وعشرين . هل يمكن أن تأخذ الغسيل ؟	رقم غرفتي هو ثلاثة ستة وعشرين. بصير توخذ الغسيل؟
2440	corpus-6-test-corpus-26-train	سأرى ما إذا كان أي منها يناسبني .	راح أشوف اذا في اشي منهن بناسبني.
2441	corpus-6-test-corpus-26-train	أريد غلاية .	بدي هيتر .
2445	corpus-6-test-corpus-26-train	أحضر لي بعض من الجبن المبشور .	هاتلي شوي من الجبنة المبروشة.
2462	corpus-6-test-corpus-26-train	هل يمكن أن أحصل على قمصاني نظيفة غداً صباحاً ؟	ممكن ألاقي قمصاني نظيفات بكرا الصبح؟
2476	corpus-6-test-corpus-26-train	هل لك أن تطلب منه أن يعاود الاتصال بي ؟	ممكن تخليه يرجع يتصل علي بعدين؟
2490	corpus-6-test-corpus-26-train	لماذا إذاً ؟	ليش لعاد؟
2492	corpus-6-test-corpus-26-train	عذراً . هل يوجد محل كتب قريب من هنا ؟	عفواً . في مكتبة بتبيع كتب قريب من هون ؟
2496	corpus-6-test-corpus-26-test	أعتقد أنك ارتكبت خطأً . الغرفة دفع ثمنها مسبقاً . معي إيصال .	بظن إنك غلطت. الغرفة حاسبت عنها قبل. معي وصل.
2505	corpus-6-test-corpus-26-train	الحافلة هناك .	الباص هناك .
2516	corpus-6-test-corpus-26-train	أريد لفتان من ISO مائة ، فيلم ملون ، ستة وثلاثين لقطة ، من فضلك .	بدي لفتين أيزو مية، فلم ملون، ستة وثلاثين لقطة ، لو سمحت.
2519	corpus-6-test-corpus-26-train	أود أن أصرف هذا الشيك بسبعين دولاراً .	بدي أصرف هاذ الشيك بقيمة سبعين دولر.
2521	corpus-6-test-corpus-26-train	أود أن أشتري طوابع لعشرة بطاقات بريدية إلى اليابان ، من فضلك .	بدي أشتري طوابع لعشر رسائل لليابان، لو سمحت.
2528	corpus-6-test-corpus-26-train	هل توجد مصارف بالقرب من المحطة ؟	في بنوك قريبة من المحطة؟
2531	corpus-6-test-corpus-26-train	أخشى أن يكون هناك خطأ في الفاتورة .	خايف يكون في غلط بالفاتورة.
2552	corpus-6-test-corpus-26-test	إنه صحيح هنا .	هو صحيح هون.
2557	corpus-6-test-corpus-26-train	واحد شيزبرجر لكي أذهب ، من فضلك .	واحد تشيز برقر عشان أروح، لو سمحت.
2578	corpus-6-test-corpus-26-test	لم يعد بإمكانك حقيقةً أن تقوم بعمل تصميم دون كمبيوتر بعد الآن .	بطلت تقدر تعمل تصميم بدون كمبيوتر من هون و طالع.
2591	corpus-6-test-corpus-26-train	أجري .	أركض.
2601	corpus-6-test-corpus-26-train	هناك قطع في بلوزتي . أتساءل هل يمكنك أن تخيطيه لي ، من فضلك ؟	في مزع ببلوزتي. بدي اسألك اذا بتقدر تخيطلي اياه، لو سمحت؟
2613	corpus-6-test-corpus-26-dev	كم الأجرة إلى مانشستر ؟	قديش الأجرة لمانشستر؟
2643	corpus-6-test-corpus-26-train	هل يمكن أن تقرضني سلك إمداد ؟	ممكن تعيرني وصلة كهربا؟
2644	corpus-6-test-corpus-26-train	أين يمكنني أن أشتري حصيرة للشاطئ ؟	من وين بقدر أشتري درج للشط؟
2670	corpus-6-test-corpus-26-test	إذاَ ، من فضلك أعطني حجزاً جديداً .	لعاد، لو سمحت أعطيني حجز جديد.
2676	corpus-6-test-corpus-26-train	أعطني قطعة لحم الخنزير هذه ، ولكن ليس بسمك تلك .	أعطييني قطعة لحمة الخنزير هاي، بس ما تكون سميكة مثل هذيك.
2678	corpus-6-test-corpus-26-train	سنأتي في السابعة .	رح نيجي الساعة سبعة.
2687	corpus-6-test-corpus-26-train	عندما أرى الأسعار بهذا الرخص ، يبدو الأمر سخيفاً أن أشتري أي شيء في اليابان .	لما أشوف الأسعار بهالرخص ، بحس أنه مسخرة الواحد يشتري أي شي باليابان.
2690	corpus-6-test-corpus-26-train	سرقت سجلاتي ، أيضاً .	انسرقت ملفاتي، كمان.
2695	corpus-6-test-corpus-26-train	مخروط من الأيس كريم الفانيليا ، من فضلك .	قمع بوزة على فانيلا، لو سمحت.
2702	corpus-6-test-corpus-26-train	أوافق . يجب أن تصبح طبيعية جداً .	أنا موافق. لازم تصير طبيعة كثير.
2704	corpus-6-test-corpus-26-train	لاحظ الفجوة ، لاحظ الفجوة ، ثم قرب الأبواب ، من فضلك .	لاحظ الفتحة، لاحظ الفتحة ، بعدين قرب الابواب، لو سمحت.
2707	corpus-6-test-corpus-26-train	سأحتاج إلى بطاقة ائتمان .	راح أحتاج الفيزا .
2708	corpus-6-test-corpus-26-dev	تفضل الرقم .	تفظل الرقم.
2715	corpus-6-test-corpus-26-test	أخبرني عن منطقة جيدة لهذا النهر ، من فضلك .	احكيلي عن مكان كويس لهاظا النهر، لو سمحت.
2726	corpus-6-test-corpus-26-train	من فضلك أعطني تقريراً عن الحادث .	لو سمحت أعطيني تقرير للحادث.
2729	corpus-6-test-corpus-26-train	لا ، أشكرك حالياً .	لا، شكراً الك حالياً.
2734	corpus-6-test-corpus-26-train	حسنا ، ابق على الخط . سيد/ ناكاجيما ، الآنسة/ سايتو يبدو أنها لا ترد على المكالمة . هل تريدني أن أتصل عليها فترة أطول ؟	طيب ، خليك معي على الخط. السيد ناكاجيما ، الست سايتو شكلها ما بترد على المكالمة. بدك أرن عليها لمدة أطول شوي؟
2736	corpus-6-test-corpus-26-dev	ربما ، ولكن ينبغي أن ندرس كلا على حدا .	ممكن، بس لازم ندرس كل واحد لحال.
2747	corpus-6-test-corpus-26-train	يبدو أنها نادرة جداً .	شكلها نادرة كثير.
2748	corpus-6-test-corpus-26-train	أين بيان أمتعة الرحلة سبعة صفر ثلاثة ؟	وين استلام شناتي الرحلة رقم سبعة صفر ثلاثة؟
2760	corpus-6-test-corpus-26-train	شيء خطأ مع حقيبتك .	اشي غلط بشنتك .
2765	corpus-6-test-corpus-26-train	هل هذا سيفسد ؟	هاذ رح يخرب؟
2772	corpus-6-test-corpus-26-train	لا ، شكراً . من الأفضل أن لا أشرب المزيد .	لا، شكراً. احسنلي ما أشرب اكثر من هيك.
2808	corpus-6-test-corpus-26-train	من فضلك أخبرني عن بعض الشوارع المناسبة للتسوق .	لو سمحت احكيلي عن شوية شوارع مليحة للتسوق.
2811	corpus-6-test-corpus-26-dev	هل هذه الحافلة تذهب إلى فندق هيلتون ؟	هاذ الباص بروح لفندق الهيلتون؟
2816	corpus-6-test-corpus-26-train	الآن ، هذه اللوحة خاصة جداً . رسمها تسوروتارو كاتاأوكا . إنه معروف بأنه فنان عالمي .	هسا، هاي اللوحة كثير مميزة. رسمها تسوروتارو كاتاأوكا. معروف هاذ فنان عالمي.
2850	corpus-6-test-corpus-26-train	لدي تقدير كبير للموسيقى الكلاسيكية .	كثير بقدر الموسيقى الكلاسيكية.
2851	corpus-6-test-corpus-26-dev	هل يمكنني أن أدعوك للعشاء في الخارج وقتاً ما ؟	بقدر اعزمك على العشا برا يوماً ما؟
2862	corpus-6-test-corpus-26-train	حسنا . ما هو اسم شريكك ورقمه ، من فضلك .	ماشي . شو اسم شريكك ورقمه، لو سمحت.
2871	corpus-6-test-corpus-26-train	عذراً . دعني أخرج ، من فضلك .	عفوا. خليني أطلع، لو سمحت.
2878	corpus-6-test-corpus-26-train	هل يمكنك أن تستدعي موظفاً يتحدث اليابانية ؟	ممكن تنادي موظف بحكي بالياباني؟
2898	corpus-6-test-corpus-26-train	نزور أقاربنا كثيراً إلى حد ما .	إحنا منزور قرايبنا كثير كثير .
2939	corpus-6-test-corpus-26-train	ميكي هاياكاوا . هذه غرفة سبعة صفر اثنين .	ميكي هاياكاوا. هاي غرفة رقم سبعة صفر اثنين.
2945	corpus-6-test-corpus-26-train	علي أن أمكث هنا الليلة ، أليس كذلك ؟ هل يمكنك مساعدتي حجز غرفة بفندق ؟	لازم أظل هون الليلة، مش هيك؟ بتقدر تساعدني أحجز غرفة بفندق؟
2947	corpus-6-test-corpus-26-train	يجب أن لا تكون طويلة . خمسة عشر دقيقة في الأغلب .	المفروض ما يطول. خمسطعشر دقيقة غالباً.
2960	corpus-6-test-corpus-26-train	هل يمكنك أن تخبرني بقيمة هذه المكالمة ؟	بتقدر تحكيلي تكلفة هاي المكالمة؟
2964	corpus-6-test-corpus-26-train	حسنا ، هل يمكنك أن تخبرها أنني اتصلت ، من فضلك ؟ سأتصل بها مرة أخرى فيما بعد .	طيب، بتقدر تحكيلها اني اتصلت، لو سمحت؟ راح أتصل فيها مرة ثانية بعدين.
2973	corpus-6-test-corpus-26-train	هل توجد أية جولة صباحية ؟	في أي جولات صباحية؟
2982	corpus-6-test-corpus-26-train	هل تغير عملات أجنبية ؟	إنت بتصرف عملات أجنبية؟
2983	corpus-6-test-corpus-26-test	إجمالي ميزانيتنا حوالي خمسين دولاراًً لثلاثة أشخاص .	ميزانيتنا كلها حوالي خمسين دولار لثلاث أشخاص.
2990	corpus-6-test-corpus-26-train	أن يمكنني أن أشتري لفة من الفيلم ؟	من وين بقدر أشتري شريط أو فلم تصوير؟
2995	corpus-6-test-corpus-26-train	هل لديك بيرة يابانية ؟	عندك بيرا يابانية؟
3001	corpus-6-test-corpus-26-test	أريد بذلة استحمام مقاس صغير , من فضلك .	بدي بدلة سباحة مقاسها صغير، لو سمحت.
3016	corpus-6-test-corpus-26-train	أريد تسجيل أمتعتي .	بدي أسجل شنطي.
3029	corpus-6-test-corpus-26-train	هذه السيدة كاوازو في غرفة رقم ستة عشر أحدى عشر .	هاي الست كاوازو بالغرفة سطعش إحدعش.
3030	corpus-6-test-corpus-26-train	مرحباً بك .	يا مرحبا فيك.
3038	corpus-6-test-corpus-26-dev	لا يوجد أي منها .	ما في منهم.
3040	corpus-6-test-corpus-26-train	أيهما أكثر أهمية للشعب الياباني , عيد رأس السنة أم عيد الكريسماس ؟	شو هو الأهم للشعب الياباني ، ليلة راس السنة ولا عيد الكريسماس؟
3041	corpus-6-test-corpus-26-test	رقم مقعدك هو اثنان وثلاثون أ . بعد ذلك سر في خط مستقيم في هذه الطرقة . إنه المقعد المجاور للنافذة .	رقم مقعدك اثنين وثلاتين أ. بعدين، امشي دغري لاخر هاد الممر. المقعد اللي عندالشباك.
3073	corpus-6-test-corpus-26-train	لحظة من فضلك .	لحظة لو سمحت.
3109	corpus-6-test-corpus-26-train	من فضلك أكمل البيانات الناقصة في التقرير .	لو سمحت كمّل البيانات الناقصة في التقرير.
3111	corpus-6-test-corpus-26-dev	لا أفهم الإنجليزية الأمريكية ، إنما أتحدث الإنجليزية الراقية .	ما بفهم الإنجليزي الأمريكي، أنا بحكي بالانجليزي الراقي.
3120	corpus-6-test-corpus-26-train	منذ أمس .	من مبارح.
3129	corpus-6-test-corpus-26-train	تشمل تأمين ضد التصادم والدين .	بتشمل تأمين ظد التصادم والدين.
3134	corpus-6-test-corpus-26-test	فقدت بطاقة المطالبة .	ضيعت بطاقة الاستلام تبعي.
3152	corpus-6-test-corpus-26-train	هل لديكم دبابيس زينة ذات تصميمات رائعة ؟	عندك بروشات شكلها حلو؟
3155	corpus-6-test-corpus-26-train	إنني أتصل من كشك عمومي في ماسي .	أنا بحكي معك من كشك عام بماسي.
3170	corpus-6-test-corpus-26-test	هذه كبيرة جداً .	هاي كثير كبيرة.
3176	corpus-6-test-corpus-26-train	كم أجر الانتظار في الساعة ؟	كم تكلفة الصفة لكل ساعة؟
3179	corpus-6-test-corpus-26-train	سيداتي سادتي ، لدينا على متن رحلتنا اليوم مضيفين يتحدثون اليابانية يمكن التعرف عليهم من خلال الشارة التي يلبسونه . إذا كنت تعرف أي شخص يريد مساعدة في الترجمة ، من فضلك دعنا نعرف .	سيداتي وسادتي،برحلتنا اليوم، عنا مضيفين بحكوا ياباني بتعرفوهم من الباجة اللي لابسينها. إذا بتعرف إنه أي حد بحتاج مساعدة بالترجمة، لو سمحت خلينا نعرف.
3182	corpus-6-test-corpus-26-train	هل توجد أي حقبة معينة للفن تفضلها ؟	في أي فترة معينة بالفن إنت بتفضلها؟
3185	corpus-6-test-corpus-26-train	من فضلك تحقق منها مرة أخرى .	لو سمحت اتأكد منها مرة ثانية.
3195	corpus-6-test-corpus-26-train	سر في خط مستقيم على طول النهر حوالي نصف ميل . ستصل للمتنزه .	إمشي دغري على طول النهر حوالي نص ميل. بتصل المنتزه.
3201	corpus-6-test-corpus-26-dev	كلاً ، إنهم متينين جداً .	لا، هظول كثير قويات.
3207	corpus-6-test-corpus-26-train	حسناً ، سأرسلها لك إلى لاس فيجاس .	اوك، راح أبعثها إلك على لاس فيجاس.
3209	corpus-6-test-corpus-26-train	أبحث عن قميص للجري .	بدور عقميص للركض.
3220	corpus-6-test-corpus-26-train	هل تود شرب شيئاً من الحانة ؟	بتحب تشرب إشي من البار؟
3222	corpus-6-test-corpus-26-dev	هذا الطريق من فضلك . خذ هذا المصعد .	هاذ الطريق لو سمحت. أخدذ هاذ السلم.
3238	corpus-6-test-corpus-26-train	من الأفضل أن تستقل قطار الثامنة والنصف .	الأفضل إنك تطلع بقطار الساعة ثمنية ونص.
3267	corpus-6-test-corpus-26-test	هل يوجد دار للسينما بالقرب من هنا ؟	في سينيما قريبة من هون؟
3269	corpus-6-test-corpus-26-train	الآن موسم جمع المحار ، لذلك سيكونون في حالة جيدة .	هسا موسم جمع المحار، عشان هيك بيكونو طيبين.
3279	corpus-6-test-corpus-26-train	أريد ساعة مستعملة .	بدي ساعة مستعملة.
3284	corpus-6-test-corpus-26-train	سأقوم بتسجيل الدخول في تمام الساعة الثامنة مساءاً تقريباً .	راح أنزل بالفندق حوالي الساعة ثمنية المسا .
3285	corpus-6-test-corpus-26-train	الوقت يتأخر . يجب أن أرحل .	الوقت تأخر. لازم أروح.
3289	corpus-6-test-corpus-26-train	لم أستخدم خدمة الغسيل عندكم . أيمكنك التحقق مرة أخرى ؟	أني ما استخدمت خدمة الغسيل تبعتكم. بتقدر تتأكد مرة ثانية؟
3292	corpus-6-test-corpus-26-train	أريد شاي من فضلك .	بدي شاي إذا بتسمح.
3295	corpus-6-test-corpus-26-train	كلاً ، لا يوجد .	لا، ما في.
3304	corpus-6-test-corpus-26-train	هل هذه هي آخر محطة ؟	هاظا آخر موقف؟
3318	corpus-6-test-corpus-26-train	لنتصل به .	خلينا نرلنه.
3323	corpus-6-test-corpus-26-train	هل هذا المتبل حار ؟	هاظ المتبل حار؟
3334	corpus-6-test-corpus-26-train	أين يمكنني أن أستقل حافلة لمشاهدة المعالم ؟	من وين ممكن اركب باص لحتى اتفرج ع المعالم؟
3335	corpus-6-test-corpus-26-train	أجل ، أريد مشاهدة معالم المدينة .	اه، أنا بدي اشوف معالم المدينة.
3351	corpus-6-test-corpus-26-test	يوجد الكثير من السائحين بالقرب من المبنى ، ويبدو أنهم تجمعوا لإلقاء نظرة على ما يحدث .	في كتير سواح حوالين البناية، شكلهم متجمعين عشان يشوفوا شو اللي بصير.
3359	corpus-6-test-corpus-26-train	شكراً على كرم ضيافتك .	شكراً الك على حسن الضيافة.
3375	corpus-6-test-corpus-26-train	الأمانة هي السياسة المثلى .	الأمانة هي أحسن سياسة.
3385	corpus-6-test-corpus-26-train	هل لك أن توقظني في تمام السادسة من فضلك ؟	بتقدر تصحيني الساعة ستة، لو سمحت؟
3392	corpus-6-test-corpus-26-train	كم السعر لنصف يوم ؟	قديش التكلفة لنص يوم؟
3397	corpus-6-test-corpus-26-train	أنا كينجي .	أني كينجي.
3402	corpus-6-test-corpus-26-train	هل تعرف أي أماكن جيدة لمشاهدتها في شيكاجو ؟	بتعرف أي أماكن حلوة نشوفها بشيكاغو؟
3404	corpus-6-test-corpus-26-train	حسناً ، في حالة إصرار كليكما , سأذهب معكما .	طيب، اذا انتو الاثنين مصرين، أني راح اروح معكو.
3413	corpus-6-test-corpus-26-dev	هل لك أن تستبدل هذه بواحدة أخرى من نفس النوع من فضلك ؟	ممكن تبدل هاي بوحدة ثانية من نفس النوع، لو سمحت؟
3446	corpus-6-test-corpus-26-train	أريد القيام بحجز للساعة الثالثة والنصف ظهراُ .	بدي أعمل حجز للساعة ثلاثة ونص الظهر.
3489	corpus-6-test-corpus-26-train	خزينة الودائع , من فضلك .	صندوق الأمانات ، لو سمحت.
3502	corpus-6-test-corpus-26-train	من فضلك أحضر نبيذاً مناسباُ .	لو سمحت جيب واين مليح.
3512	corpus-6-test-corpus-26-test	أريد مكان ما صغير .	بدي أي مكان صغير.
3522	corpus-6-test-corpus-26-train	هل مطلوب منى دفع ثمن الغاز ؟	مطلوب مني أدفع حق الغاز؟
3557	corpus-6-test-corpus-26-train	لص . أمسكوا به .	حرامي. امسكوه .
3562	corpus-6-test-corpus-26-test	نحن في انتظار حضور أصدقائنا .	احنا منستني صحابنا يجوا.
3572	corpus-6-test-corpus-26-train	من فضلك أعطني بعض النقود الفكة .	لو سمحت أعطيني شوية فراطة.
3619	corpus-6-test-corpus-26-test	تموج شعر دائم مشدود من فضلك .	كيرلي عطول مشدود، لو سمحت.
3628	corpus-6-test-corpus-26-train	إنها صغيرة الجسم وذكية .	هي صغيرة الحجم و ذكية.
3638	corpus-6-test-corpus-26-test	ما عرض الأوبرا اليوم ؟	شو عرض الأوبيرا اليوم؟
3640	corpus-6-test-corpus-26-train	مقلي من فضلك .	مقلي، لو سمحت.
3644	corpus-6-test-corpus-26-train	غسيلي لم يرجع حتى الآن .	غسيلي ما رجع لحد هسا.
3649	corpus-6-test-corpus-26-train	على فكرة , هل أنت غير مشغول السبت القادم ؟	بالمناسبة، راح تكون فاضي السبت الجاي؟
3667	corpus-6-test-corpus-26-train	حسناً ، إذن , ربما سننسجم مع بعضنا .	طيب، يعني ، ممكن نرتاح لبعض .
3669	corpus-6-test-corpus-26-train	إنها عاملتني كما لو كنت متسولاُ .	عاملتني كإني شحاد.
3683	corpus-6-test-corpus-26-train	أفهم . هل يمكنك مساعدتي في هذا المشكلة الأخرى أيضاُ ؟	فاهم. ممكن تساعدني بهاي المشكلة الثانية كمان ؟
3685	corpus-6-test-corpus-26-train	هل يمكنك وضع عدسات نظر في هذا النظارة الشمسية ؟	ممكن تركبلي عدسات طبية على هاي النظارة الشمسية؟
3698	corpus-6-test-corpus-26-dev	سآخذ اثنين من هذه .	راح أوخد ثنتين من هاي.
3705	corpus-6-test-corpus-26-train	يا لها من كلاب ذكية . من أي فصيلة ؟	يا الله شو إنها كلاب ذكية . من أي فصيلة؟
3721	corpus-6-test-corpus-26-train	وقعت منى الشوكة . من فضلك أحضر واحدة أخرى .	وقعت مني الشوكة. لو سمحت جبلي وحدة ثانية.
3742	corpus-6-test-corpus-26-train	كان هذا ممتعاً .	كان هاذا بسلي.
3747	corpus-6-test-corpus-26-train	بالتأكيد . سر في خط مستقيم ثم اتجه يميناُ عند الناصية الثالثة . ستجده على يمينك .	أكيد. امشي دغري ولف يمين من الدخلة الثالثة. راح تلاقيه على يمينك.
3765	corpus-6-test-corpus-26-dev	هل لديكم فيلم شفاف ملون ؟	عندك فلم شفاف ملون؟
3780	corpus-6-test-corpus-26-train	أتعرف كاثي ؟ إنه عيد ميلادها .	بتعرف كاثي؟ هاي حفلة عيد ميلادها.
3789	corpus-6-test-corpus-26-train	هل لديك لوحة موضوع عليها الألوان ؟	عندك لوحة ملونة؟
3792	corpus-6-test-corpus-26-dev	هل يمكنني أن أدفع بشيكات سياحية ؟	بقدر أدفع عن طريق شيكات سياحية؟
3806	corpus-6-test-corpus-26-train	لكن ، هو , يا رجل كيف أعرف أنه الشيء الحقيقة ؟	بس ، هو، يا زلمة كيف بدي أعرف أنه هاظ الإشي حقيقي؟
3825	corpus-6-test-corpus-26-train	هل يمكنني شرائها معفاة من الضرائب ؟	بقدر اشتريها معفية من الضرايب؟
3829	corpus-6-test-corpus-26-train	لا يمكنني وضع الأمتعة تحت المقعد . هل لك أن تحتفظ بها لأجلي من فضلك ؟	أنا ما بقدر أحط شنطي تحت المقعد. ممكن تخبيلي ياهم لو سمحت؟
3835	corpus-6-test-corpus-26-train	هل يمكن أن تضع حقيبة السفر هذه في صندوق السيارة .	ممكن لو سمحت تحطلي شنة السفر هاي بالطبون ؟
3847	corpus-6-test-corpus-26-train	أنا خارج الآن . لذلك سآخذها .	أنا طالع هسا، لهيك راح أوخذها.
3856	corpus-6-test-corpus-26-train	من فضلك أرسل أحداً للطابق العلوي ليأخذ حقائبي الساعة السادسة والنصف .	لو سمحت ودي حدا للطابق الفوقاني عشان يوخذ شناتيي الساعة ستة ونص.
3858	corpus-6-test-corpus-26-dev	أريد خريطة لسان فرانسيسكو والمنطقة المحيطة .	بدي خريطة لسان فرانسيسكو والمنطقة اللي حويلاها.
3859	corpus-6-test-corpus-26-train	ما نوع الخبز لديكم ؟	شو نوع الخبز اللي عندكو؟
3860	corpus-6-test-corpus-26-train	أين المصعد ؟	وين الأصنصير؟
3861	corpus-6-test-corpus-26-train	هل يوجد أحد يستطيع العزف على البيانو ؟	في أي حدا بعرف يعزف عالبيانو؟
3872	corpus-6-test-corpus-26-test	في أي محطة سأنزل للذهاب إلى مبنى إمباير ستيت ؟	بأي موقف لازم انزل عشان أروح على عمارة امباير ستيت؟
3887	corpus-6-test-corpus-26-test	تبلغ الميزانية أقل من ألف دولار .	الميزانية أقل من ألف دولار.
3892	corpus-6-test-corpus-26-train	شكراً . لكنني لا أعتقد أن عندي وقت للإقامة لمدة ليلتين . هل يمكنك حجز غرفة بسريرين لي في ذلك الفندق ليلة الثاني عشر من مارس فقط ؟	شكراً ، بس ما بتوقع أنه معي وقت عشان أظل ليلتين. ممكن تحجزلي غرفة مزدوجة في الفندق لليلة اثنعش ثلاث بس؟
3900	corpus-6-test-corpus-26-dev	هل يمكنني حجز غرفة بسريرين تطل على المحيط ؟	بصير أحجز غرفة بتختين بطل على البحر؟
3920	corpus-6-test-corpus-26-train	لم نقرر بعد .	بعدنا ما قررنا .
3928	corpus-6-test-corpus-26-train	تعثر صديقي والتوي كاحله .	صاحبي وقع والتوى كاحله.
3936	corpus-6-test-corpus-26-train	سأجرب بعضاً من الشراب المثلج .	بدي أجرب شوي من العصير المثلج.
3961	corpus-6-test-corpus-26-train	هل يوجد مطعم تايلاندي قريب من هنا ؟	في مطعم تايلندي قريب من هون؟
3972	corpus-6-test-corpus-26-train	إنها بجور ذلك المبنى المرتفع . لذلك ارجع في نفس الطريق الذي أتيت منه حتى إشارة المرور . ثم اتجه يساراً .	جنب العمارة الطويلة. لهيك ارجع مرة ثانية من نفس الطريق اللي اجيت منه لعند ما تلاقي الاشارة. وبعدها روح يسار.
3974	corpus-6-test-corpus-26-train	علي أن ألحق طائرة متجهة للوس أنجليس باكر صباح غد .	لازم ألحق طيارة لوس أنجلوس بكرا الصبح بكير.
3988	corpus-6-test-corpus-26-train	إذاً يمكنني بكل ثقة أن أزكي برج مدينة سان فرانسيسكو . فهذا يعطيك فكره عن سان فرانسيسكو .	يعني بنصحك عالأكيد ب برج مدينة سان فراسيسكو. رح يعطيك لمحة عن سان فرانسيسكو.
3991	corpus-6-test-corpus-26-train	أريد الحصول على تأمين .	بدي تأمين.
3995	corpus-6-test-corpus-26-test	لنستخدم كيس بارد لتخفيف الألم .	خلينا نستخدم كمادة باردة عشان يخف الوجع.
4013	corpus-6-test-corpus-26-train	تريد أن تشتري ثوبا .	هي بدها تشتري فسطان.
4016	corpus-6-test-corpus-26-train	كم أجرة التاكسي حتى هذا الفندق ؟	كم أجرة التكسي لعند الفندق؟
4017	corpus-6-test-corpus-26-train	أين الحمام ؟	وين الحمام؟
4034	corpus-6-test-corpus-26-train	هل يكلفني دخول هذا المبنى أي أموال ؟	بدفع أي مصاري إذا فتت على هاي العمارة؟
4036	corpus-6-test-corpus-26-train	قم بها بطريقتك .	اعملها بطريقتك.
4082	corpus-6-test-corpus-26-test	أنا أبحث عن شيء أنيق .	أني بدور على اشي لايق.
4104	corpus-6-test-corpus-26-train	النافذة محشورة .	الشباك محشور بالزواية.
4109	corpus-6-test-corpus-26-dev	على أي جانب من ميدان الاتحاد هي ؟	على اي جهة من دوار الاتحاد بتكون؟
4119	corpus-6-test-corpus-26-train	نصف أوقية من شانيل رقم خمسة من فضلك .	نص أوقية من شانيل رقم خمسة، لو سمحت.
4129	corpus-6-test-corpus-26-train	ما رأيك في بعض القهوة ؟	شو رأيك بكاس قهوة؟
4143	corpus-6-test-corpus-26-train	هل أنا بحاجة إلى تذكرة ؟	بحتاج تذكرة؟
4182	corpus-6-test-corpus-26-train	ما هي تكلفة الخدمة تقريبا ؟	قديش بتكلف الخدمة تقريبا؟
4185	corpus-6-test-corpus-26-train	كم المدة التي يستغرقها من هنا ؟	قديش بوخذ وقت من هون؟
4187	corpus-6-test-corpus-26-train	كريمة وسكر ؟	كريمة وسكر؟
4193	corpus-6-test-corpus-26-train	هل ثمة تخفيضات للأعضاء المشاركين ؟	في أي تخفيظات للأعظاء المشاركين؟
4219	corpus-6-test-corpus-26-train	هل هناك قطار فائق السرعة في التاسعة والنصف ؟	في قطار سريع الساعة تسعة ونص؟
4221	corpus-6-test-corpus-26-train	دعني افحص سائل الفرامل والمحرك . يبدو أن محرك سيارتك قد أوشك علي التوقف .	خليني أشيك على زيت البريكات و الماتور. ماتور سيارتك شكله بآخر أنفاسه.
4224	corpus-6-test-corpus-26-train	لم يكن خطئي .	ما كان غلطي.
4262	corpus-6-test-corpus-26-train	لا كهرباء .	ما في كهربا.
4263	corpus-6-test-corpus-26-train	سوف أبلغ الشرطة بذلك .	راح أبلغ الشرطة بهاظ الإشي.
4269	corpus-6-test-corpus-26-train	هل سيحاسب كل واحد منا على مشروباته منفردا ؟	بده يحاسب كل واحد منا عطلبه لحال؟
4275	corpus-6-test-corpus-26-train	في أي مكان من ثلاثين حتى خمسين دولارا لليلة .	بأي مكان من ثلاثين لخمسين دولار لليلة.
4278	corpus-6-test-corpus-26-train	من فضلك ، اصلح هذه .	لو سمحت صلح هاذا.
4284	corpus-6-test-corpus-26-train	في أيام السنة الجديدة . وفي مناسبات خاصة مثل حفلات الزواج ومراسم منح الجوائز أو في العزاء .	بايام السنة الجديدة .و مناسبات خاصة مثل حفلات الأعراس و توزيع الجوائز أو العزا.
4285	corpus-6-test-corpus-26-test	المزيد من المستردة ، من فضلك .	كثرلي ماسترد، لو سمحت.
4305	corpus-6-test-corpus-26-train	لماذا لا تعطيها هدية ؟	ليش ما تعطيها هدية؟
4321	corpus-6-test-corpus-26-test	أي فيلم توصي به ؟	أي فلم بتنصحني فيه؟
4324	corpus-6-test-corpus-26-test	هاك عشرين دولارا واعطني فكة دولارين من فضلك .	هاك عشرين دولر وأعطيني صرافة دولرين ، لو سمحت.
4326	corpus-6-test-corpus-26-train	لقد انتقدتني ضمنا .	معنى حكيك إنك بتنقدني .
4335	corpus-6-test-corpus-26-train	يمكن أن أحضر في الساعة الثانية .	ممكن آجي على الساعة ثنتين.
4341	corpus-6-test-corpus-26-train	هل هذه هي حقائب الرحلة جال صفر واحد ؟	هي هاي شناتي الرحلة صفر واحد؟
4346	corpus-6-test-corpus-26-train	هذه هي رحلتي الأولى إلى باريس .	هاي رحلتي الأولى لباريس.
4348	corpus-6-test-corpus-26-train	هل لك أن تقدر التكلفة قبل أن تبدأ العمل فيها ؟	ممكن تقدر قديش بكلف قبل ما تبدا شغل فيه؟
4358	corpus-6-test-corpus-26-train	تعالى ، من فضلك .	تعال، لو سمحت.
4364	corpus-6-test-corpus-26-test	رحلتنا للتخييم يجب أن تكون ممتعة .	رحلة التخييم تبعتنا لازم تكون مرتبة.
4365	corpus-6-test-corpus-26-train	متي سنستقل القارب ؟	متى بدنا نركب القارب؟
4373	corpus-6-test-corpus-26-train	ليس لدينا حقيبة لمثل هذه الكمية ولذلك سأضعها في هذه الحقيبة البلاستيكية الكبيرة .	ما عنا شنتة توسع كل هاي الكمية عشان هيك راح أحطها بهاي الشنتة البلاستيك الكبيرة .
4374	corpus-6-test-corpus-26-train	أود لعب التنس .	بدي ألعب تنس.
4375	corpus-6-test-corpus-26-train	يوجد عصير أناناس وبرتقال وطماطم .	في عصير أناناس و برتقال و بندورة.
4377	corpus-6-test-corpus-26-train	الجانب الأيسر من هذه الدور بجوار المصعد .	الجهة اليسار من هاذ الطابق جنب الاصنصير.
4382	corpus-6-test-corpus-26-test	ماذا سيعرض في قاعة الحفلات الموسيقية اليوم ؟	شو راح ينعزف بقاعة الحفلات الموسيقية اليوم؟
4409	corpus-6-test-corpus-26-train	ما رأيك في مشاهدة فيلم آخر ؟	شو رأيك نشوف فيلم ثاني؟
4418	corpus-6-test-corpus-26-train	من فضلك ، بدلي شيك المسافرين إلي نقود .	لو سمحت اصرفلي هاد الشك السياحي كاش.
4432	corpus-6-test-corpus-26-dev	من فضلك ، أريد أن أخذ نفس الدورة غدا .	لو سمحت ، بدي آخذ نفس الدورة بكرا.
4450	corpus-6-test-corpus-26-train	ربما أعطيك إجابة أفضل من تلك بعد عرضين .	يمكن أعطيك جواب أحسن من هاذ بعد ما أشوفه مرتين.
4451	corpus-6-test-corpus-26-test	أريد هدية بمناسبة الذكرى السنوية .	بدي هدية لمناسبة الذكرى السنوية.
4464	corpus-6-test-corpus-26-train	ما هي المسرحيات الموسيقية المعروضة حاليا ؟	شو في مسرحيات موسيقية معروضة هسا؟
4475	corpus-6-test-corpus-26-train	هل لديك مرآة ؟	عندك مراية؟
4478	corpus-6-test-corpus-26-dev	عذرا ، ولكني ضللك طريقي . هل لك أن تساعدني ؟	معلش ، بس ضيعت طريقي. ممكن تساعدني؟
4479	corpus-6-test-corpus-26-train	سوف آخذ هذه ، من فضلك .	راح آخذ هاظ ، لو سمحت.
4497	corpus-6-test-corpus-26-train	لا يمكنك جلب الألعاب النارية إلى كندا .	ما بتقدر تجيب ألعاب نارية على كندا.
4501	corpus-6-test-corpus-26-train	ما أروع زوجتك من طاهية .	قديش مرتك طباخة ممتازة.
4503	corpus-6-test-corpus-26-train	هل تريد أي مساعدة ؟	بدك أي مساعدة؟
4505	corpus-6-test-corpus-26-train	هلا حجزت لي تاكسي الساعة السادسة صباح غد , من فضلك ؟	ممكن تحجزلي تكسي الساعة ستة الصبح لبكرا ، لو سمحت؟
4510	corpus-6-test-corpus-26-train	ماذا تفضل مع طبقك الرئيسي .	شو بتحب مع الطبق الرئيسي؟
4540	corpus-6-test-corpus-26-test	هل يوجد بوتيك قريب من هنا ؟	في بوتيك قريب من هون؟
4549	corpus-6-test-corpus-26-train	هذا المكان مكتظ بالناسب ، أليس كذلك ؟	هاظ المكان معبى ناس، مش هيك؟
4558	corpus-6-test-corpus-26-train	عفواً . ستكون جاهزة في غضون خمس دقائق .	عفوا. رح تكون جاهزة خلال خمس دقايق.
4588	corpus-6-test-corpus-26-train	عانيت من ألم في الرقبة أثناء نومي ؟	صارت رقبتي توجعني وأنا نايم.
4594	corpus-6-test-corpus-26-train	نعم ، لا توجد مشكلة . هل من الممكن أن أرى جواز سفرك ؟	نعم، ما في مشكلة. ممكن أشوف جواز سفرك؟
4615	corpus-6-test-corpus-26-test	لا امتلك أي نقود .	ما معي مصاري.
4624	corpus-6-test-corpus-26-train	متى يتعين علي أن أكون في المحطة ؟	أي وقت لازم أكون بالمحطة؟
4630	corpus-6-test-corpus-26-train	هناك مطاعم كثيرة قريبة من هنا .	في كثير مطاعم بالمنطقة.
4635	corpus-6-test-corpus-26-train	بجوار حجرة الإيداع .	جنب غرفة الأمانات.
4640	corpus-6-test-corpus-26-train	إنه لمن دواعي السرور أن أتحدث معك .	إنسريت بالحكي معك.
4644	corpus-6-test-corpus-26-test	هل هناك جولة بعد الظهر ؟	في لفة بعد الظهر؟
4648	corpus-6-test-corpus-26-test	إنني مع أصدقائي .	أني مع صحابي.
4653	corpus-6-test-corpus-26-train	لقد تمتعت بإقامتي . شكراً لك .	انبسطت بإقامتي . شكراً الك.
4654	corpus-6-test-corpus-26-train	الشاطئ أسفل يمينا . ياله من منظر رائع .	الشط تحت على اليمين. شو المنظر بجنن.
4658	corpus-6-test-corpus-26-train	شكراً لك على الانتظار ، يا أستاذه مكجوير . هاك هو . امض من فضلك .	شكراً لإنك استنيتي، آنسة مكجوير. هيو هون. وقعي لو سمحتي.
4662	corpus-6-test-corpus-26-train	هل لديك أي صورة لبطاقة هوية ؟	عندك اي صورة للهوية؟
4671	corpus-6-test-corpus-26-train	سبعاً ، من فضلك .	سبعة، لو سمحت.
4674	corpus-6-test-corpus-26-train	أريد أن أرسل هذا إلى المغسلة . متى ستكون جاهزة ؟	بدي أودي هاذ للمغسلة. متى بكون جاهز؟
4685	corpus-6-test-corpus-26-train	لقد خلعت البنطلون .	شلحت البنطلون.
4699	corpus-6-test-corpus-26-train	نعم . تم نقل أمتعة شخص آخر إلى غرفتي تواً . من فضلك ، هل من الممكن أن تقوم بفحصها ؟	اه، في شناتي لحدا ثاني وصلت غرفتي هسا.لو سمحت، ممكن تشوفها؟
4714	corpus-6-test-corpus-26-train	هل من الممكن أن تفصل أكثر ؟	يتقدر توضح أكثر ؟
4729	corpus-6-test-corpus-26-train	هل استرحت في نومك ؟	ارتحت بالنومة؟
4733	corpus-6-test-corpus-26-train	هلا ضغطت على زر مصراع النافذة ؟	ممكن تكبس كبسة الشباك؟
4740	corpus-6-test-corpus-26-train	مفتاحين من فضلك ؟	مفتاحين لو سمحت.
4742	corpus-6-test-corpus-26-dev	أريد مصباحاً .	بدي لمبة.
4744	corpus-6-test-corpus-26-train	في نهاية الممر .	بنهاية الممر.
4773	corpus-6-test-corpus-26-dev	أرغب في الحصول على بعض ورق الرسائل .	بدي شوية ورق رسائل.
4788	corpus-6-test-corpus-26-train	هل سنذهب بالحافلة ؟	راح نروح بالباص؟
4790	corpus-6-test-corpus-26-train	هل قلت إنك ستغادر إلى طوكيو غدا ؟	قلت إنك رايح على طوكيو بكرا؟
4795	corpus-6-test-corpus-26-test	دعني أنام حتى التاسعة .	خليني نايم للساعة تسعة.
4801	corpus-6-test-corpus-26-train	يجب أن أنتقل إلى عربة مكيفة واحد صفر صفر . هل هذا ممكن ؟	بدي انتقل لعرباية مكيفة واحد صفر صفر. ممكن؟
4813	corpus-6-test-corpus-26-train	كيف حال اللعب معك هذه الأيام ؟	كيف اللعب معك هاي الايام؟
4814	corpus-6-test-corpus-26-dev	أشعر بضيق في الصدر .	حاس بخنقة بصدري.
4826	corpus-6-test-corpus-26-train	لا توجد مشكلة . إذا حضرت في الخامس من سبتمبر ، فسيكون بإمكانك الاستمتاع بعرض فيلم علمي لأن عندنا يوماً خاصاً مفتوحاً أول يوم جمعة من كل شهر .	ما في مشكلة. اذا اجيت بخمسة تسعة ، بتقدر تستمتع بالفلم العلمي لأنه احنا عنا يوم مميز مفتوح بأول جمعة من كل شهر.
4828	corpus-6-test-corpus-26-train	هل لديكم أية جولة سياحية أخرى ؟	عندك أي رحلة ثانية؟
4836	corpus-6-test-corpus-26-train	حسنا . خصم خمسة في المائة . هل يوافقك لك ؟	ماشي ، خصم خمسة بالمية. بمشي معك؟
4845	corpus-6-test-corpus-26-train	إنني ذاهب إلى باريس .	أناي رايح على باريس.
4848	corpus-6-test-corpus-26-train	إنها ليست أحدث طراز ، أليس كذلك ؟	هاي مش أحدث موديل ، صح؟
4857	corpus-6-test-corpus-26-train	موعده المقرر هو الثامنة والنصف مساءْ بالتوقيت المحلي .	موعده هو الساعة ثمنية ونص المسا بالتوقيت المحلي.
4889	corpus-6-test-corpus-26-train	أظهر هذا المبنى معنا , من فضلك .	بين هاظ المبنى معنا، لو سمحت.
4894	corpus-6-test-corpus-26-train	حسناً . أريد سلطانية من الحجم المتوسط ، وكرات الأرز .	طيب. بدي سلطانية حجم وسط وكرات الرز.
4901	corpus-6-test-corpus-26-train	كيف يبدو هذا ؟	كيف شكله؟
4924	corpus-6-test-corpus-26-train	أريد أن أرى ذاك الذي في نافذة العرض ، من فضلك .	بدي أشوف هاذ الموجود بالواجهة، لو سمحت.
4945	corpus-6-test-corpus-26-train	مستحيل . نحن في إجازة . إنني أرفض الجلوس في غرفة بالفندق ومشاهدة البيسبول في التلفاز . أريد الذهاب لمشاهدة مسرحية .	مستحيل. احنا بإجازة. أنا ما بدي أقعد بغرفة بالفندق اشوف البيسبول بالتلفزيون. بدي أروح أحظر مسرحية.
4957	corpus-6-test-corpus-26-train	هل بإمكاني اللمس ؟	بقدر ألمسه؟
4974	corpus-6-test-corpus-26-train	أيمكنك الحضور إلى هنا لإصلاحه ؟	ممكن تيجي هون عشان اتصلحه؟
4983	corpus-6-test-corpus-26-train	أريد بعض الألياف الصناعية .	بدي شوية ألياف اصطناعية.
4985	corpus-6-test-corpus-26-train	اسمي " تارو تاناكا " لدي حجز مسبق .	اسمي " تارو تاناكا " عندي حجز من قبل.
4990	corpus-6-test-corpus-26-train	أريد بعضاً من كريم التنظيف .	بدي شوية كريم تنظيف.
5004	corpus-6-test-corpus-26-train	أريد رداءا ذات أكمام طويلة .	بدي جاكيت كم طويل.
5009	corpus-6-test-corpus-26-train	لقد سُرقت حقيبتي .	انسرقت شنتتي.
5017	corpus-6-test-corpus-26-train	لقد تقابلنا بالصدفة لعدة مرات ، أليس كذلك ؟	تقابلنا بالصدفة عدة مرات ، مش هيك؟
5035	corpus-6-test-corpus-26-train	هل يمكنني أن ألقي نظرةً أخرى على قائمة الطعام ؟	ممكن أشوف المنيو مرة ثانية؟
5045	corpus-6-test-corpus-26-train	لا تزال تبدو عليهم علامات المرض وشحوبة الوجه .	بعده مبين عليهم علامات المرض و وجوهم شاحب.
5082	corpus-6-test-corpus-26-train	كم عددها ؟	كم عددها ؟
5083	corpus-6-test-corpus-26-train	فراولة ، من فضلك .	فراولة، لو سمحت.
5090	corpus-6-test-corpus-26-dev	قمة جبل " فوجي " هي اعلي قمة جبلية في اليابان حيث يبلغ ارتفاعها ثلاثة آلاف وسبعمائة وستون مترا .	جبل فوجي هو أعلى قمة باليابان على ارتفاع ثلاثة ألاف وسبعمية وستين متر.
5091	corpus-6-test-corpus-26-train	لا ، ليس بعد ، هناك الكثير نختار فيه .	لا، بعده ، في كثير عشان تنقي منه
5098	corpus-6-test-corpus-26-dev	أرغب في كريم مسائي للبشرة .	بدي كريم ليلي للبشرة.
5104	corpus-6-test-corpus-26-test	إنها بين المخبز ومحل الجزارة .	موجودة بين المخبز والملحمة.
5116	corpus-6-test-corpus-26-train	هل لك أن تقصّر الأكمام ؟	ممكن تقصر الكمام؟
5117	corpus-6-test-corpus-26-train	أخشى أن لا يكون هنا أية دورة لتعليم الجولف .	خايف ما يكون في دورة لتعليم الجولف
5121	corpus-6-test-corpus-26-train	هل لك أن تريني الخاتم الثاني من جهة اليسار ؟	ممكن تفرجيني الخاتم الثاني يلي من جهة اليسار؟
5124	corpus-6-test-corpus-26-train	ألا تسأله أن يتصل بي ؟	بتقدر تحكيله يتصل فيّ؟
5138	corpus-6-test-corpus-26-train	لقد حاولت إجراء مكالمة دولية ، هل نجح ذلك معك من قبل ؟	جربت أعمل مكالمة دولية. زبطت معك قبل هيك؟
5148	corpus-6-test-corpus-26-test	هذا خطأ .	هاظ غلط.
5175	corpus-6-test-corpus-26-train	نعم ، هي ، لأنك تستطيع أن ترى العلم أمام مكتب البريد .	صح، هي . لأنه بتقدر تشوف العلم قدام مكتب البريد.
5207	corpus-6-test-corpus-26-test	بالتأكيد سوف ترسلهم ، أليس كذلك ؟	أكيد راح تبعتثم، صح؟
5219	corpus-6-test-corpus-26-train	أود إجراء مكالمة هاتفية باستخدام بطاقة ائتمان .	بدي أعمل مكالمة عن طريق الفيزا.
5224	corpus-6-test-corpus-26-train	أريد ما يخصني لكي أرحل .	بدي اللي بخصني مشان أروح.
5245	corpus-6-test-corpus-26-train	لدي وصولها ، سوف ندفع ثمن شحنها إلى عنوان منزلك .	لما توصل. راح ندفع حق الشحن لعنوان بيتك.
5246	corpus-6-test-corpus-26-dev	هذه الأيام ، استخدم الكمبيوتر بشكل دائم في العمل .	هاي الأيام ، أنا بستخدم الكمبيوتر دايماً بالشغل.
5250	corpus-6-test-corpus-26-train	أوه ! موافق ، لقد فهمت ، سوف آتي إلى مكانك .	أووه، طيب. فهمت. راح آجي عندك.
5259	corpus-6-test-corpus-26-train	لا ، هذا يكفي .	لا، هاذ بكفي.
5261	corpus-6-test-corpus-26-train	هل لي أن آخذ بطانية ووسادة ؟	ممكن آخذ حرام و مخدة ؟
5262	corpus-6-test-corpus-26-train	هل يمكنك أن تحضر هنا قريباً بقدر المستطاع ، من فضلك ؟	بتقدر تيجي هون بأسرع وقت، لو سمحت؟
5263	corpus-6-test-corpus-26-train	قدحاً من القهوة , من فضلك .	فنجان قهوة، لو سمحت.
5267	corpus-6-test-corpus-26-test	ابحث عن كروت لمناظر تعكس طبيعة جزر هاواي .	بدور على كروت لمنظر بتبين طبيعة جزر هاواي.
5272	corpus-6-test-corpus-26-train	هل لك بأن تضيق منطقة الوسط سنتيمترات ؟	ممكن تظيقلي الخصر كم صانتي؟
5289	corpus-6-test-corpus-26-train	إنني في نفس السن .	أني بنفس العمر.
5300	corpus-6-test-corpus-26-train	ألا تحضر لي بعض القهوة ؟	ممكن تجبلي قهوة؟
5307	corpus-6-test-corpus-26-dev	ثلاث مائة وخمسون دولارا ؟ إن هذا يفوق ميزانيتي .	ثلاثمية وخمسين دولار؟ هاظا أعلى من ميزانيتي.
5323	corpus-6-test-corpus-26-train	هل نحتاج إلى طرح هذا للتصويت ؟ إن لم نكن في حاجة إلى هذا ، فإمكاني أن أعتقد حينئذ أننا قد وصلنا إلى نتيجة , سأقوم بإرسالها إلى مجلس إدارتنا صباح غد .	هل احنا محتاجين نحط هاظ للتصويت؟ اذا لأ، بتوقع أنه وصلنا للنتيجة، بدي أبعثها لمجلس ادارتنا بكرا الصبح.
5334	corpus-6-test-corpus-26-train	هل تعرف ما إذا كان هناك أي فنادق رخيصة الأسعار ؟	بتعرف اذا في أي فنادق رخيصة؟
5361	corpus-6-test-corpus-26-train	صباح الخير . هل استرحت في نومك ؟	صباح الخير. ارتحت بنومتك ؟
5364	corpus-6-test-corpus-26-train	ماذا تنوي أن تفعل عقب الانتهاء من المدرسة . ؟	شو بتخطط تعمل بعد ما تخلص مدرسة؟
5366	corpus-6-test-corpus-26-train	سرقت حقيبتي في الشارع .	انسرقت شنتي بالشارع.
5367	corpus-6-test-corpus-26-train	هل كان لديك أية خدمات أخرى إلى جانب طعام الإفطار هذا الصباح ؟	في عندك أي خدمات ثانية غير فطور الصبح؟
5407	corpus-6-test-corpus-26-train	من فضلك ، أريد فنجاناً من القهوة البيضاء .	لو سمحت ، بدي فنجان قهوة بالحليب.
5410	corpus-6-test-corpus-26-test	وهو كذلك . هل فندق شيراتون قريب من هناك ؟	وهو هيك . فندق الشيراتون قريب من هناك؟
5411	corpus-6-test-corpus-26-train	أتمنى ألا تكون متعبا جدا .	بتمنى ما تكون كثير تعبان.
5431	corpus-6-test-corpus-26-train	أبغي تأجير سيارة من هذا الطراز لمدة يومين .	بدي استأجر سيارة من هاذ الموديل لمدة يومين.
5436	corpus-6-test-corpus-26-train	سآخذ صورة لجاك دانيلز .	راح آخذ صورة لجاك دانيلز.
5437	corpus-6-test-corpus-26-train	أريد كيساً من الفشار ، من فضلك .	بدي كيس بوشار، لو سمحت.
5447	corpus-6-test-corpus-26-train	سقط مني واحدا من عصى التزلج .	وقعت مني عصاية من عصي التزلج.
5455	corpus-6-test-corpus-26-train	نحن لا نجلب أية هدايا إلى الحفل ، وبدلا من ذلك يحضر الضيوف أموالاً نقدية .	إحنا ما منجيب أي هدايا عالحفلة، بدال هيك الضيوف بجيبو مصاري.
5458	corpus-6-test-corpus-26-train	أود أن أرسله عن طريق البريد .	حاب أبعثه عن طريق البريد.
5492	corpus-6-test-corpus-26-train	وصلت الطائرة متأخرة بسبب الثلج الكثيف .	وصلت الطيارة متأخرة عشان الثلج كان كثيف.
5518	corpus-6-test-corpus-26-train	الفاتورة من فضلك ؟	الفاتورة لو سمحت.
5521	corpus-6-test-corpus-26-train	من فضلك هل يمكنك أن تتلقى رسالة ؟	لو سمحت بتقدر تستقبل رسالة؟
5540	corpus-6-test-corpus-26-train	آسف ، لا يمكنني متابعتك . هل من الممكن أن تتحدث ببطء أكثر من فضلك .	عفواً، مش قادر أتبع معك. ممكن تحكي ابطأ شوي، لو سمحت؟
5549	corpus-6-test-corpus-26-dev	ماذا يمكنني أن أريك ؟	شو بقدر أورجيك؟
5559	corpus-6-test-corpus-26-train	هل يمكنني أن التقط بعض الصور ؟	ممكن اوخذ شوية صور؟
5570	corpus-6-test-corpus-26-train	من مائة .	من مية.
5584	corpus-6-test-corpus-26-dev	رقم الرحلة الجوية اتش بي تسعة وثمانين المتجهة إلى طوكيو في الحادي عشر من مارس .	رقم الرحلة الجوية إتش بي تسعة و ثمانين رايحة لطوكيو في احدعش ثلاث.
5585	corpus-6-test-corpus-26-train	هل بإمكاني الحصول على طبق آخر مثل هذا ؟	بقدر آخذ صحن ثاني مثل هاذ؟
5594	corpus-6-test-corpus-26-dev	هل لديك واحدة أخرى ؟	عندك واحدة ثانية؟
5596	corpus-6-test-corpus-26-train	من فضلك ، احضر طعام الإفطار إلى غرفتي في السابعة من صباح الغد .	لو سمحت جبلي فطوري على غرفتي بكرا الساعة سبعة الصبح.
5615	corpus-6-test-corpus-26-train	عامل الصيانة سيصعد في الحال .	عامل الصيانة راح يطلع مباشرة.
5617	corpus-6-test-corpus-26-dev	آسف سأعود لاحقاً .	آسف. راح أرجع بعدين.
5640	corpus-6-test-corpus-26-test	كيف أستقلها ؟	كيف اركبهاا؟
5648	corpus-6-test-corpus-26-train	هل هناك أماكن شاغرة بالنسبة لرحلة الخميس ؟	في أماكن فاظية برحلة يوم الخميس؟
5657	corpus-6-test-corpus-26-train	عفواً . هلا سمحت لي بالمرور ؟	عفواً. بتسمحلي أمر؟
5680	corpus-6-test-corpus-26-train	هل لديك أية نباتات أو فواكه ؟	في عندك أي خضار أو فواكه؟
5684	corpus-6-test-corpus-26-train	من فضلك أخبرني كيف أملأ بطاقة النزول إلى البر ؟	لو سمحت قلي كيف أعبي بطاقة النزول للبر؟
5695	corpus-6-test-corpus-26-train	أعتقد أن سيارتي تستحق حوالي خمسة آلاف دولارا .	أنا بتوقع سيارتي بتسوى حوالي خمس الآف دولار.
5706	corpus-6-test-corpus-26-train	هل هذا الطعام منخفض السعرات الحرارية ؟	هاذ الأكل قليل الكالوريز؟
5717	corpus-6-test-corpus-26-train	أية حافلة يجب أن آخذ إلى المحطة ؟	أي باص لازم أوخذ عشان أروح على المحطة؟
5723	corpus-6-test-corpus-26-train	نعم , إنه هو . ولكن ستضطر إلى الدوران يسارا في إشارة المرور الثالثة وتستمر في ذلك الشارع حتى تصل إلى الطريق رقم ستة وستين .	نعم، هيو. بس رح تظطر ادور يسار من عند الاشارة الثالثة وتظلك بنفس الشارع لعند ما توصل طريق ستة وستين.
5733	corpus-6-test-corpus-26-dev	أريد كوبا من الماء لأتناول بعض الدواء , من فضلك .	بدي كاسة مي عشان اوخذ الدوا، لو سمحت.
5761	corpus-6-test-corpus-26-train	أكون ممتنا جدا لو أخذتني إلى الشاطئ .	راح أكون كثير ممنون لو توخذني لعند الشط.
5772	corpus-6-test-corpus-26-train	آسف . لقد اتصلت بالرقم الخطأ . هذه وكالة تانكيوشا الصحفية .	آسف. رنيت على الرقم الغلط. هاي وكالة تانكيوشا الصحفية.
5779	corpus-6-test-corpus-26-train	إننا سندفع الحساب ونغادر .	إحنا رح ندفع الحساب و نطلع.
5830	corpus-6-test-corpus-26-dev	ما نوع هذه الموسيقى ؟	شو نوع هاي الموسيقى؟
5847	corpus-6-test-corpus-26-train	من فضلك أعط طفلك هذا الدواء الشراب , جرعة واحدة بعد كل وجبة .	لو سمحت إعطي هاذ الدوا الشراب لابنك، مرة وحدة بعد كل وجبة.
5848	corpus-6-test-corpus-26-train	هذا الموديل متوفر بمقاسات ثمانية وعشرين , وواحد وثلاثين وخمسة وثلاثين سنتيمترا .	هاظ الموديل متوفر بمقاسات ثمنية وعشرين، و واحد و ثلاثين و خمسة و ثلاثين صانتي.
5875	corpus-6-test-corpus-26-train	أوه , يبدو كأنه قرعة .	أوه، شكله قرعة .
5898	corpus-6-test-corpus-26-train	هل يمكن أن أستعمل هاتفك ؟	بصير استعمل تلفونك؟
5902	corpus-6-test-corpus-26-test	رائحته جميلة . كم ثمنه ؟	ريحته حلوة. قديش سعره؟
5906	corpus-6-test-corpus-26-train	أريد أن أعيد التأكيد على رحلتي إلى شيكاغو في السابع عشر .	بدي أرجع اأكد على رحلتي الطيران لشيكاغو في سبعطعش الشهر.
5913	corpus-6-test-corpus-26-train	أكلت كثيرا نوعا ما .	يعني كلت كثير .
5914	corpus-6-test-corpus-26-train	هل يمكن أن أتحدث إلى السيدة براون ؟	ممكن أحكي مع الآنسة براون؟
5916	corpus-6-test-corpus-26-train	هذا البيت يبدو مريحا للمعيشة فيه , أليس كذلك ؟	هاد البيت مبين كثير مريح العيشة فيه، مش هيك؟
5934	corpus-6-test-corpus-26-dev	أريد أن أحجز على شركة نورث وست إيرلينز على الرحلة رقم صفر ثمانية ستة في الخامس .	بدي احجز على شركة نورث وست إيرلينز على الرحلة رقم صفر ثمانية ستة بخمسة الشهر.
5940	corpus-6-test-corpus-26-train	محفظتي , جواز السفر ومتعلقات شخصية أخرى .	محفظتي، جواز السفر وشغلات شخصية ثانية.
5956	corpus-6-test-corpus-26-train	متى تغلقون ؟	متى بتسكرو؟
5974	corpus-6-test-corpus-26-test	انتظر دقيقة . ربما أكون قد تركته في غرفة الاستراحة .	استنى دقيقة. ممكن أكون تركته بغرفة الاستراحة.
5987	corpus-6-test-corpus-26-train	هذا بالضبط ما كنت سأقوله .	هاظ بالزبط اللي كنت بدي أحكيه.
5988	corpus-6-test-corpus-26-train	نعم , أعتقد ذلك .	اه، بتوقع هيك.
5997	corpus-6-test-corpus-26-train	منزلك كبير . كم عدد الغرف ؟	بيتك كبير. قديش عدد الغرف؟
6006	corpus-6-test-corpus-26-train	استمتعنا بالعشاء .	كيفنا عالعشا.
6024	corpus-6-test-corpus-26-test	أفهم ، لكن لا أستطيع أن أقولها .	فاهم، بس بقدر أقولها.
6047	corpus-6-test-corpus-26-train	أوو ، نعم ، من فضلك . أنا أتمنى أن لا يصابوا بدوار البحر .	ممم، اه، لو سمحت. أنا بس بتمنى ما يصيبهم دوار البحر.
6056	corpus-6-test-corpus-26-test	إلى طوكيو ، من فضلك .	على طوكيو، لو سمحت.
6073	corpus-6-test-corpus-26-train	ما هو موعد وصولنا المقدر ؟	شو هو قت وصولنا المتوقع؟
6086	corpus-6-test-corpus-26-train	سأغادر باكراً غداً ، لذلك أود أن أدفع الآن .	بدي اطلع بكرا الصبح، عشان هيك حاب أدفع هسا.
6100	corpus-6-test-corpus-26-test	نبيذ غير حلو ، من فضلك .	واين بدون سكر، لو سمحت.
6109	corpus-6-test-corpus-26-test	مقعد ممنوع به التدخين ، من فضلك .	مقعد ممنوع التدخين فيه ، لو سمحت.
6156	corpus-6-test-corpus-26-train	هو مشغول الآن .	هو مشغول هسا.
6167	corpus-6-test-corpus-26-train	هل الأجانب يمكنهم الحصول على الكتب في المكتبة ؟	بقدروا الأجانب يستخدموا الكتب بالمكتبة؟
6179	corpus-6-test-corpus-26-train	هل من الممكن أن أمكث في غرفتي حتى الثانية مساءً ؟	ممكن أظل بغرفتي للساعة ثنتين المسا؟
6190	corpus-6-test-corpus-26-train	ها-ها . صباح الخير حان دورك . إنه على ما يرام .	هههه. صباح الخير صار دورك. هو كويس.
6193	corpus-6-test-corpus-26-train	أود بعضاً من فيلم رقم ايه إس ايه لهذه الكاميرا ، من فضلك .	بدي فيلم رقم ايه إس ايه لهاي الكميرا، لو سمحت.
6205	corpus-6-test-corpus-26-train	أين رسومات مونيت ؟	وين رسمات مونيت؟
6214	corpus-6-test-corpus-26-train	البيتزا لذيذة . من صنعها ؟	هاي البيتزا زاكية. مين عملها؟
6221	corpus-6-test-corpus-26-train	ما هو طعم هذا الطبق ؟	شوطعم هاذ الأكل؟
6227	corpus-6-test-corpus-26-train	هم أيضاً غاليين .	هذول كمان غاليين.
6228	corpus-6-test-corpus-26-train	متى يغادر القطار التالي إلى بوسطن ؟	متى راح يتحرك القطار الجاي على بوسطن؟
6232	corpus-6-test-corpus-26-dev	أخطط لتعلم الجولف .	بفكر أتعلم جولف.
6247	corpus-6-test-corpus-26-dev	من فضلك أعطني مشروباً أخر .	لو سمحت أعطيني عصير ثاني.
6253	corpus-6-test-corpus-26-train	يا له من راكب ماهر للأمواج .	راكب أمواج شاطر.
6272	corpus-6-test-corpus-26-train	أخشى أن تكون الأكمام قصيرة جدا .	خايف تكون الكمام كثير قصيرة.
6283	corpus-6-test-corpus-26-train	هل يمكنك أن تريني كيف أضع الغاز ؟	ممكن توريني كيف أحط الغاز؟
6285	corpus-6-test-corpus-26-train	هل أجرة الفندق تضم الإفطار ؟	أجار الفندق شاملة الفطور؟
6287	corpus-6-test-corpus-26-train	هل هذا كل شيء ؟	هاظ كل اشي؟
6291	corpus-6-test-corpus-26-train	إنه في نهاية هذا الطريق .	هو بنهاية هاظا الطريق.
6339	corpus-6-test-corpus-26-train	من فضلك ابدأ العداد .	لو سمحت شغل العداد.
6363	corpus-6-test-corpus-26-train	غرفتي أبرد من اللازم .	غرفتي أبرد من اللازم.
6411	corpus-6-test-corpus-26-train	سأعود إليك عندما تكون أقل انشغالاً .	راح أرجعلك بس تكون مش مشغول كثير.
6413	corpus-6-test-corpus-26-dev	هل لديك واحد أكبر ؟	عندك واحد أكبر؟
6418	corpus-6-test-corpus-26-train	أشعر بتحسن .	حاس بتحسن.
6430	corpus-6-test-corpus-26-dev	هل أنت ملم بجغرافيا اليابان ؟	إنت ملم بتظاريس اليابان؟
6436	corpus-6-test-corpus-26-train	من فضلك أرني أين أنا على هذه الخريطة .	لو سمحت ورجيني وين أنا موجود على هاي الخريطة.
6437	corpus-6-test-corpus-26-train	مائة بالمائة قطن .	مية بالمية قطن .
6466	corpus-6-test-corpus-26-train	أود أن أغير لغرفة تطل على المحيط . هل توجد أي رسوم إضافية ؟	بدي أبدل لغرفة مطلة على البحر. في أي رسوم ثانية؟
6472	corpus-6-test-corpus-26-train	كم ثمن إيجار نصف يوم للوحة ؟	قديش بكلف استئجار سفينة لمدة نص يوم؟
6481	corpus-6-test-corpus-26-train	العاشر من نوفمبر .	عشرة احدعش.
6484	corpus-6-test-corpus-26-dev	أود شريطاً للآلة الكاتبة .	بدي شريط للآلة كاتبة.
6492	corpus-6-test-corpus-26-train	إنها لذيذة جداً .	كثير طيبة.
6497	corpus-6-test-corpus-26-train	متى سنقلع ؟	أميت راح نقلع؟
6498	corpus-6-test-corpus-26-train	كيف عرفت السائق متى تريد أن تنزل ؟	كيف بتخلي السايق يعرف إنك بدك تنزل؟
6513	corpus-6-test-corpus-26-train	أربعة وعشرين دولاراً . هل تريد المزيد ؟	أربعة وعشرين دولار. بدك كمان؟
6515	corpus-6-test-corpus-26-train	عملت الحجز في طوكيو منذ شهر .	عملت الحجز بطوكيو من شهر.
6517	corpus-6-test-corpus-26-train	أشكرك من أعماق قلبي .	بشكرك من كل قلبي.
6525	corpus-6-test-corpus-26-train	هل أنزل هنا لمركز روكفيلر ؟	أنزل من هون عمركز روكفيلر؟
6539	corpus-6-test-corpus-26-train	من فضلك قس حجم حذائي .	لو سمحت قيس حجم كندرتي.
6547	corpus-6-test-corpus-26-train	إنها رائعة .	هاي روعة.
6550	corpus-6-test-corpus-26-train	هل ستحدد موعداً للخروج معي ؟	بدك تحدد موعد لتطلع معي؟
6552	corpus-6-test-corpus-26-train	من فضلك نظف هذا المعطف .	لو سمحت نظف هاظا الكبوت.
6553	corpus-6-test-corpus-26-train	أود أن أؤجر قارب بمحرك .	بدي استأجر قارب سريع.
6574	corpus-6-test-corpus-26-train	أين قسم السيدات ؟	وين قسم النسوان؟
6581	corpus-6-test-corpus-26-train	القهوة غير محسوبة .	القهوة مش محسوبة؟
6593	corpus-6-test-corpus-26-train	في أي مجال كان من قبل ؟	بأي مجال هو كان قبل؟
6602	corpus-6-test-corpus-26-train	اللعنة . اللعنة . اللعنة . اللعنة . لقد كبرت معتاداً على وجهها .	يلعن. يلعن. يلعن. يلعن. أنا تعودت كثيرعلى وجهها.
6609	corpus-6-test-corpus-26-train	هل يجب أن أدفع الرسم الإضافي عندما أدخل مبنى ؟	لازم أدفع رسوم ثانية بس أفوت عأي مبنى؟
6613	corpus-6-test-corpus-26-test	أهلاً ، شريكك على الخط . هيا ، من فضلك .	اهلين ، اللي طلبته على الخط. يلا، لو سمحت.
6625	corpus-6-test-corpus-26-train	جرحي يؤلمني .	جرحي بوجعني.
6635	corpus-6-test-corpus-26-train	أين المحطة ؟	وين المحطة؟
6657	corpus-6-test-corpus-26-train	عندي قشعريرة .	عندي قشعيرية.
6659	corpus-6-test-corpus-26-train	ثلاثة أيام .	ثلاث أيام.
6660	corpus-6-test-corpus-26-dev	أعبر الجسر من هناك ، وستجد المكتبة على يدك اليسرى .	اقطع الجسر لهناك، وراح تلاقي المكتبة على ايدك الشمال.
6692	corpus-6-test-corpus-26-dev	من فضلك ساعدني أعثر على مرشد يتحدث اليابانية .	لو سمحت ساعدني ألاقي دليل سياحي بحكي ياباني.
6699	corpus-6-test-corpus-26-train	لا أريد واحدة ضخمة .	ما بدي وحدة دفشة.
6700	corpus-6-test-corpus-26-train	سيكون هناك تأخير بسيط .	راح يكون في تأخير بسيط.
6715	corpus-6-test-corpus-26-train	ما هي الفوارق بين هذه الفنادق ؟	شو الفرق بين هاي الفنادق؟
6724	corpus-6-test-corpus-26-test	فاتتني محطتي .	راح علي الموقف.
6736	corpus-6-test-corpus-26-train	كان عظيماً . شكراً .	كان مرتب . شكراً الك.
6740	corpus-6-test-corpus-26-dev	سأكون هناك حوالي السادسة مساءً .	راح أكون هناك حوالي الساعة ستة المسا.
6746	corpus-6-test-corpus-26-train	هل لديك أي شيء لفترة أطول قليلاً ؟	عندك أي اشي لوقت أطول شوي؟
6766	corpus-6-test-corpus-26-train	تاريخ الانتهاء تسعة عشر من مارس تسعة وتسعين .	تاريخ انتهاء الصلاحية تسعطعش من شهر ثلاث التسعة وتسعين.
6780	corpus-6-test-corpus-26-test	كيف كانت ؟	كيف كانت؟
6800	corpus-6-test-corpus-26-train	هل توجد أية كازينوهات جيدة ؟	في أي كازينوهات حلوة؟
6810	corpus-6-test-corpus-26-train	هذه هي فلوس أقلام الحبر . فاتورة بمائة دولار .	هايذ حق قلام الحبر. فاتورة بمية دولار.
6812	corpus-6-test-corpus-26-train	أين قسم السيدات ؟	وين قسم النسوان؟
6825	corpus-6-test-corpus-26-train	أين يمكن أن أركب القارب ؟	من وين بقدر اطلع بالقارب؟
6832	corpus-6-test-corpus-26-train	صديقي مصاب .	صاحبي انصاب.
6835	corpus-6-test-corpus-26-train	تبدو بصحة جيدة .	شكلك منيح.
6836	corpus-6-test-corpus-26-dev	هل سيكون هذا المتجر مفتوحاً غداً ؟	راح يكون هاظ المحل فاتح بكرا؟
6862	corpus-6-test-corpus-26-test	إنه طول الطريق لنهاية البهو .	على طول الطرق لآخر اللوبي.
6864	corpus-6-test-corpus-26-train	هل يمكنك أن تشذب شاربي ؟	ممكن لو سمحت ترتبلي شواربي؟
6866	corpus-6-test-corpus-26-dev	هذا يأتي مع طبق السلطة واختيار بين البطاطس المشوية أو المحمرة .	هاذ بيجي معه صحن سلطة ويا بطاطا مشوية يا محمرة.
6875	corpus-6-test-corpus-26-dev	أين يمكنني أن أشتري إبريقاً ؟	من وين بقدر اشتري بريق؟
6914	corpus-6-test-corpus-26-train	لا يمكن أن أبيع هذه دون روشتة .	ما بقدر أبيع هاي بدون وصفة طبية.
6917	corpus-6-test-corpus-26-train	هل يمكن أن أحجز خمسة مقاعد في الصف نفسه .	ممكن أحجز خمس مقاعد بنفس الصف؟
6923	corpus-6-test-corpus-26-test	هل يمكنك أن تقرضني حبل القطر ، من فضلك ؟	ممكن تعيرني حبل القطار، لو سمحت؟
6944	corpus-6-test-corpus-26-train	أي سيارة ذات أداء أفضل ؟	أي سيارة سواقتها احسن؟
6960	corpus-6-test-corpus-26-train	لن تأخذ خصماً مهما حاولت .	ما رح توخد خصم قد ما حاولت .
6966	corpus-6-test-corpus-26-train	هلا فتحت هذه الحقيبة ، من فضلك ؟ ماذا يوجد هنا .	بتقدر تفتح هاي الشنطة، لو سمحت؟ شو لقيت فيها هون؟
6970	corpus-6-test-corpus-26-train	أريد أن أعمل مكالمة مسافة طويلة إلى فندق هيلتون في بوسطن .	بدي أحكي تلفون لمسافة طويلة لعند فندق هيلتون في بوسطن.
6984	corpus-6-test-corpus-26-test	هل السيدات يقبلن هذا ؟	الستات بقبلن بهاذ؟
6991	corpus-6-test-corpus-26-train	كن حذراً ، السقف منخفض .	انتبه ، السقف واطي.
6999	corpus-6-test-corpus-26-train	لا أستطيع رؤية الشاشة جيداً من هنا ، هل يمكنني تبديل المقاعد لبعض الوقت ؟	أنا مش قادر أشوف الشاشة مليح من هون. ممكن نبدل المقاعد شوي؟
7030	corpus-6-test-corpus-26-train	لقد قمت بزيارة البحيرات الكبرى لأول مرة .	هاي أول مرة بزور البحيرات الكبرى.
7048	corpus-6-test-corpus-26-train	ثمة شئ خطأ في آلة التهوية هذه .	في اشي غلط بالمروحة هاذ.
7057	corpus-6-test-corpus-26-train	أحتاج إلى طيب .	بدي دكتور.
7070	corpus-6-test-corpus-26-train	كم المدة التي قضتها هي حتى الآن في المملكة المتحدة ؟	قديش المدة اللي عاشتها بإنجلترا؟
7081	corpus-6-test-corpus-26-train	من المرجح أن محبا للإبداع الفني مثلك سيستمتع اللوحات الزيتية غير التقليدية وعروض الموسيقى بالشوارع .	متوقع من محب للابداع الفني مثلك راح ينبسط باللوحات الزيتية والموسيقى وعروض الموسيقى بالشوارع.
7098	corpus-6-test-corpus-26-train	كم الوقت ؟	قديش الساعة؟
7099	corpus-6-test-corpus-26-dev	سآخذ هوت دوج وكولا .	رح آخذ سندويشة هوت دوغ وكولا.
7104	corpus-6-test-corpus-26-dev	هذا هو مسئول الربط الخارجي .	هاظ هو مسؤول الربط الخارجي.
7123	corpus-6-test-corpus-26-train	يمكنك رؤية مبنى ابيض اللون ، أليس كذلك ؟ إنه أمام ذلك المبنى .	بتقدر تشوف عمارة بيضا، صح؟ هو قبال هاي العمارة.
7130	corpus-6-test-corpus-26-test	منذ متى ؟	من متى؟
7137	corpus-6-test-corpus-26-test	ليس لدى أي شئ لكي أعلنه .	ما عندي أي اشي عشان أعلنه.
7198	corpus-6-test-corpus-26-dev	ماذا ؟ هل عليك دفع ضرائب عندما يكون لديك أكثر من ثلاثة زجاجات كحول ؟	شو؟ عليك ضرايب بس يكون عندك أكثر من ثلاث قناني كحول؟
7206	corpus-6-test-corpus-26-dev	صديقي مريض جداً . هل تستطيع أن تطلب دكتور ، من فضلك ؟	صاحبي كثير مريض. ممكن تطلب الدكتور، لو سمحت؟
7227	corpus-6-test-corpus-26-test	لا أعرف كثيراً عن النبيذ ؟ ماذا يناسب هذا الطبق ؟	أنا ما بعرف كثير بالواين. شو بنفع مع هاذ الأكل؟
7233	corpus-6-test-corpus-26-dev	هل تستطيع أن تتصل بي في الصباح الباكر ، من فضلك ؟	بتقدر تتصل في الصبح بكير، لو سمحت؟
7248	corpus-6-test-corpus-26-dev	هناك محطة غاز بعد مربعين سكنيين من هنا .	في محطة غاز على بعد حارتين من هون.
7253	corpus-6-test-corpus-26-train	اليابانيون لا يأخذون إجازات طويلة .	اليبانيين ما بيوخذو عطل طويلة.
7264	corpus-6-test-corpus-26-train	اشعر كأن هناك تحديق في . هل من النادر رؤية شخص ياباني ؟	حاسك بتسرح فيه. لهاي الدرجة قليل تشوف واحد ياباني؟
7269	corpus-6-test-corpus-26-test	بالطبع لا . لماذا تقول إذا ؟	طبعاً لأ. ليش بتحكي لعاد؟
7270	corpus-6-test-corpus-26-train	أي طريق يؤدي إلى مكتب البريد المركزي ؟	اي طريق بودي لمكتب البريد المركزي؟
7274	corpus-6-test-corpus-26-train	أين محطة أتوبيس جرايهاوند في هذه البلدة ؟	وين مجمع باصات جرايهاوند بهاي المدينة؟
7281	corpus-6-test-corpus-26-train	أليست المطاعم اليابانية في كيوتو غالية ، بالرغم من ذلك ؟	مش المطاعم اليابانية في كيوتو غالية؟
7289	corpus-6-test-corpus-26-train	اعتقد أن هذا عالي قليلا بالنسبة لي .	بتوقع أنه شوي عالي بالنسبة الي.
7291	corpus-6-test-corpus-26-test	لدينا غرفة مزدوجة بحمام بخمسة و ثمانين دولار .	عنا غرفة مزوجة مع حمام بخمسة وثمنين دولار.
7305	corpus-6-test-corpus-26-train	أريد سعر الكتاب .	بدي سعر الكتاب.
7314	corpus-6-test-corpus-26-test	الجو ابرد من المعتاد هذا العام ، لكنه ليس باردا بما يكفى لتساقط الثلج .	الجو أبرد من المعتاد هاي السنة ، بس مش باردة كفاية لحتى تثلج.
7321	corpus-6-test-corpus-26-train	أين يمكنني شراء تذكرة للمترو ؟	من وين بقدر أشتري تذكرة للمترو؟
7335	corpus-6-test-corpus-26-train	سآخذ مقاعد درجة رجال أعمال ، أليس كذلك ؟	راح آخد مقاعد درجة رجال الأعمال، صح؟
7343	corpus-6-test-corpus-26-train	كم أجرة التاكسي من هذا الفندق إلى المحطة ؟	كم اجار التكسي من الفندق للمجمع؟
7349	corpus-6-test-corpus-26-train	هل لي بهذه وهذه ، من فضلك ؟	ممكن آخذ هاي وهاي ، إذا تكرمت؟
7381	corpus-6-test-corpus-26-train	يقولون أن اليابان دولة غنية جداً .	بقولوا أنه اليابان بلد غني.
7386	corpus-6-test-corpus-26-train	هل هناك أي غرف خالية في عربة النوم ؟	ظل في أي غرف فاظية بعرباية النوم؟
7391	corpus-6-test-corpus-26-dev	هل تستطيع خفضها حتى عشرين دولار ، من فضلك ؟	بتقدر تنزلها لعشرين دولار، لو سمحت؟
7395	corpus-6-test-corpus-26-train	هذه هديه لصديق .	هاي هدية لرفيقي.
7412	corpus-6-test-corpus-26-train	الثلج يجعل الطريق زلق .	التلج بخلي الطريق يزحلق.
7414	corpus-6-test-corpus-26-train	لا أستطيع أن أجد كاميرتي .	ما قدرت الاقي الكميرا تبعتي.
7416	corpus-6-test-corpus-26-test	سأعد سندوتشين من لحم فخذ الخنزير .	بدي اعمل سندويشتين من لحمة فخدة الخنزير.
7438	corpus-6-test-corpus-26-train	هل لديك أي شئ لإعلانه ؟	عندك أي اشي عشان تعلنله؟
7439	corpus-6-test-corpus-26-train	هل رأيت معطف أزرق ؟ وضعته على هذا الكرسي .	شفت كبوت ازرق؟ حطيته على هاد الكرسي.
7470	corpus-6-test-corpus-26-test	هناك محل لبيع الزهور في الطريق .	في محل ورد بالطريق .
7478	corpus-6-test-corpus-26-train	أنا من طوكيو .	أني من طوكيو.
7479	corpus-6-test-corpus-26-train	أريد بعض الغسول لإزالة كريم ريفلون .	بدي غسول مشان اشيل كريم ريفلون.
7485	corpus-6-test-corpus-26-train	لدي بعض الملابس للمغسلة .	عندي شوية وعية للغسيل.
7507	corpus-6-test-corpus-26-dev	لقد طلبته منذ وقت طويل .	طلبته من زمان.
7533	corpus-6-test-corpus-26-dev	من فضلك هل لك أن ترسل بواباً إلى غرفتي في السادسة صباحاً ؟	ممكن لو سمحت تبعتلي شغيل على غرفتي الساعة ستة الصبح؟
7549	corpus-6-test-corpus-26-train	سآخذ شيكولاتة ساخنة .	بدي آخذ هوت شوكليت.
7550	corpus-6-test-corpus-26-train	نستطيع أن نرتب لتنظيف غرفاتكم .	ممكن نرتب معك عشان تنظيف غرفكم.
7574	corpus-6-test-corpus-26-train	خاص من فضلك .	خاص من فظلك.
7583	corpus-6-test-corpus-26-train	كم تكلفة الذهاب إلى فندق سي ؟	قديش بتكلف الروحة لفندق سي؟
7612	corpus-6-test-corpus-26-test	هل أستطيع الحصول على تذكرة متعددة الاستخدام ؟	ممكن أوخذ بطاقة ذكية؟
7622	corpus-6-test-corpus-26-train	أود حجز مائدة لفردين في الساعة السابعة , من فضلك .	بدي أحجز طاولة لشخصين الساعة سبعة، لو سمحت.
7626	corpus-6-test-corpus-26-train	أريد بعض الكريم الليلي .	بدي كريم ليلي.
7627	corpus-6-test-corpus-26-train	هل لك أن تغلف هذه كالهدية ؟	ممكن تلفلي هاي كهدية؟
7636	corpus-6-test-corpus-26-train	إنها الثالثة والربع .	الساعة ثلاثة وربع.
7650	corpus-6-test-corpus-26-train	سأخطط لإرسال فواتير حاجياتي اليومية ، لذا من فضلك أخبرني العنوان و اسم الشخص المسئول من فضلك .	رح أبعث فواتير حاجاتي اليومية، عشان هيك لو سمحت أعطيني عنوان واسم الشخص المسؤول.
7656	corpus-6-test-corpus-26-test	إنه من الصعب لنا أن نتحدث الإنجليزية بطلاقة .	صعب علينا نحكي انجليزي بطلاقة.
7662	corpus-6-test-corpus-26-train	هل لديك نفس هذا التصميم بكعب أعلى ؟	عندك نفس هاذ الديزاين بس كعب أعلى؟
7663	corpus-6-test-corpus-26-train	أريد جاكيت لطفل في العاشرة من العمر .	بدي جاكيت لولد عمره عشر سنين.
7671	corpus-6-test-corpus-26-train	خذني إلى طريق أباي , من فضلك .	وديني على شارع أباي، لو سمحت.
7684	corpus-6-test-corpus-26-dev	شكراً . مرحباً ، شكراً لانتظارك .	شكراً الك. مرحبا، شكراً لأنك استنيت.
7693	corpus-6-test-corpus-26-train	أنا متأكد أن لدى حجز .	أنا متأكد أنه إلي حجز.
7708	corpus-6-test-corpus-26-train	سأرسلها لك ، لذا من فضلك انتظر هنا .	راح أبعثها الك، عشان هيك استنى هون لو سمحت.
7712	corpus-6-test-corpus-26-dev	نحن هنا لمدة يوم .	إحنا هون لمدة يوم.
7721	corpus-6-test-corpus-26-train	أشعر بصداع خفيف .	حاس بصداع خفيف.
7736	corpus-6-test-corpus-26-train	لقد استمتعت بالوجبة كثيراً جداً .	كثير استمتعت بالوجبة.
7756	corpus-6-test-corpus-26-train	لا ، من فضلك اجلس وانتظر . سأعود بعد قليل .	لا، لو سمحت اقعد واستنى. راح أرجعلك بعد شوي.
7761	corpus-6-test-corpus-26-test	هل لي أن أرى السيارة ؟	ممكن أشوف السيارة؟
7767	corpus-6-test-corpus-26-train	هل لك أن ترسم لي خريطة , من فضلك ؟	ممكن ترسملي خريطة، لو سمحت؟
7789	corpus-6-test-corpus-26-test	حسناً ، يا سيدي . من فضلك ابق في غرفتك إلى أن يحضر الطبيب .	طيب، إستاذ. لو سمحت خليك بغرفتك لعند ما يجي الدكتور.
7811	corpus-6-test-corpus-26-train	لقد سرقت في شاطئ وايمانالو . من فضلك تعالى فوراً .	انسرقت على شط وايمانالو. لو سمحت تعال هسا.
7812	corpus-6-test-corpus-26-train	ماذا عن مائة دولار ؟	شو رأيك بمية دولار؟
7814	corpus-6-test-corpus-26-train	أريد هذا معبئاً .	بدي هاظا مليان.
7831	corpus-6-test-corpus-26-train	أريد أن أقدم طلباً للحصول على إصدار جديد .	بدي أقدم طلب مشان اخد إصدار جديد.
7834	corpus-6-test-corpus-26-train	لقد دعمت الحكومة تنمية الصناعات .	الحكومة بتدعم الصناعات.
7838	corpus-6-test-corpus-26-train	أعتقد أن عمره أكثر من خمسين سنة .	بتوقع عمره اكثر من خمسين سنة.
7858	corpus-6-test-corpus-26-dev	ما هو الحد الأدنى للعمر لفعل ذلك ؟	إيش أقل عمر مسموح يعمل هيك؟
7860	corpus-6-test-corpus-26-train	هل لديك أيّ خرائط بسيطة للمدينة ؟	عندي أي خرايط بسيطة للمدينة؟
7867	corpus-6-test-corpus-26-test	إذا كان بالإمكان ، لم أكن لأخلع السنّة .	اذا ممكن، أنا بفضل ما تقلع السن.
7871	corpus-6-test-corpus-26-dev	إنّ الإحصاء كرة واحدة وضربتين .	الإحصاء عبارة عن طابة وحدة وضربتين.
7883	corpus-6-test-corpus-26-train	متى سيصل القطار إلى سان دييجو ، من فضلك ؟	أميت رح يوصل القطار على سان دييجو، لو سمحت؟
7913	corpus-6-test-corpus-26-train	آوه إلقاء نظرة على صندوقك .	واو أنا حاب أشوف صندوقك.
7925	corpus-6-test-corpus-26-train	أريد بعض الشامبو .	بدي نتفة شامبو.
7947	corpus-6-test-corpus-26-train	أنا أقيم في فندق هيلتون .	أنا قاعد بفندق الهلتون.
7948	corpus-6-test-corpus-26-train	أشعر بحالة سيئة وغثيان .	حاس بلعية ووظعي زفت.
7957	corpus-6-test-corpus-26-train	لكنّي لدى موعد لرؤيتها في السّاعة الثّانية .	بس أنا عندي موعد عشان أشوفها الساعة ثنتين.
7972	corpus-6-test-corpus-26-train	هل تذهب هذه السيارة إلى إدنبرة ؟	هاي السيارة رايحة على إيدنبيره؟
7976	corpus-6-test-corpus-26-train	نعم ، رجاءً املأ هذه الاستمارة .	نعم، يا ريت تعبي هاي الاستمارة.
7983	corpus-6-test-corpus-26-train	ما هو مقدار الرسوم للوزن الزائد ؟	قديش الدفع على الوزن الزايد؟
7991	corpus-6-test-corpus-26-dev	اسمي كيمورا . أريد إلغاء حجزي الخاص بيوم الجمعة .	اسمي كيمورا. بدي ألغي حجزي تاع يوم الجمعة.
7996	corpus-6-test-corpus-26-test	أوه ، آسف . كانت هناك مشاكل ونحن نقوم بحلها ، هل تتفضل بالانتظار لمدة ثلاثين دقيقة ؟	أووه، أنا آسف. كان في مشاكل منحلها. ممكن تستنى لثلاثين دقيقة؟
8039	corpus-6-test-corpus-26-train	في أي وقت يمكنني مغادرة الفندق ؟	بأي ساعة ممكن أعمل خروج من الفندق؟
8050	corpus-6-test-corpus-26-train	فهمت الأمر .	فهمت الموضوع.
8058	corpus-6-test-corpus-26-train	سوف أطلب شخصاً ما .	رح أحكي مع حدا.
8067	corpus-6-test-corpus-26-test	هل تريد تسوية الفاتورة الآن ؟	راح تحاسب عالفاتورة هسا؟
8068	corpus-6-test-corpus-26-train	السيارة جاءت لي من الجانب عند التقاطع .	السيارة اجتلي من جهة التقاطع.
8094	corpus-6-test-corpus-26-train	إنه صندوق موسيقى .	هاذ صندوق موسيقى.
8095	corpus-6-test-corpus-26-train	أين الضاحية ؟	وين الضاحية؟
8098	corpus-6-test-corpus-26-train	هل هناك جولة بالحافلة تجوب المدينة ؟	في دورة بالباص نلف بالبلد؟
8108	corpus-6-test-corpus-26-train	في أي وقت نبدأ ؟	على أي ساعة راح نبلش؟
8114	corpus-6-test-corpus-26-train	حسنا ، يا سيدي . في الحجم المتوسط نعرض عليك فرو السمور من نوع " ميركوري " ، فهل ذلك يوافقك ؟	تمام، سيدي. مقاس ميديوم منعطيك فرو السمور من ماركة " ميركوري " . بناسبك؟
8116	corpus-6-test-corpus-26-train	لقد تسببتّ في كَدْمة بالعَضَلة .	سوتلك كدمة بالعضل.
8141	corpus-6-test-corpus-26-train	ولكن عليك أن تعدني بركل الكرة ، وليس أنا . موافق ؟	بس بدي توعدني تشوط الطابة، مش أني. طيب؟
8143	corpus-6-test-corpus-26-train	إلى أي مسافة يبعد أكثر ؟	كم المسافة اللي ظلت ؟
8149	corpus-6-test-corpus-26-train	هل لي في استعارة بعض البياضات ؟	ممكن أستعير شرارشف؟
8156	corpus-6-test-corpus-26-train	من أي نوع من الجلد الصناعي صُنعت حقيبة السفر هذه ؟	شو نوع الجلد الاصطناعي المصنوع منه شنطة السفر هاي؟
8161	corpus-6-test-corpus-26-train	لا أعتقد أن هذه السكينة نظيفة . أيمكنك أن تُحضر لي واحدة أخرى ؟	أنا ما بظن إنه هاي السكينة نظيفة. بتقدر تجبلي وحدة تانية؟
8164	corpus-6-test-corpus-26-train	لقد اشتريت هذه من لحظة ، ولكن هلاً بدلت هذه بتلك ؟	أنا اشتريت هاي من دقيقة، بس ممكن اتبدلي اياها بهاي؟
8173	corpus-6-test-corpus-26-train	بصراحة ، لا أتفق مع ذلك .	بصراحة، ما بتفق مع هاظ.
8177	corpus-6-test-corpus-26-train	هل هذا هو الطريق الصحيح إلى المحطة المركزية ؟	هاد الطريق الصح للمحطة الرئيسية؟
8183	corpus-6-test-corpus-26-train	قارب مع مرشد ، من فضلك .	قارب مع مرشد ، لو سمحت.
8193	corpus-6-test-corpus-26-train	أود أن أطلب بدلة داكنة من أجلي .	بدي أطلب بدلة لونها غامق عشاني.
8194	corpus-6-test-corpus-26-train	هذه المظلة يمكن استخدامها كعصا للسير .	هاي الشمسية بقدر استخدمها كعصاية.
8202	corpus-6-test-corpus-26-test	هل يجب علىّ أن أترك كل أمتعتي في غرفة ترك المعاطف ؟	لازم أترك كل اغراضي بغرفة الامانات؟
8210	corpus-6-test-corpus-26-train	من فضلك أرني جواز سفرك .	لو سمحت ورجيني جواز سفرك.
8227	corpus-6-test-corpus-26-train	هل يوجد مكان يقبل تنظيف الملابس في أيام الآحاد ؟	في أي مكان بقبل طلبات الغسيل كل يوم أحد؟
8233	corpus-6-test-corpus-26-train	سندويتشان برجر بالجبن ، من فضلك .	اثنين برجر بالجبنة، لو سمحت.
8234	corpus-6-test-corpus-26-train	أية حافلة تذهب إلى ميامي ؟	أي باص بروح على ميامي؟
8236	corpus-6-test-corpus-26-train	ولكن لا ضرورة لدفع بقشيش .	بس ما في داعي للبخشيش.
8248	corpus-6-test-corpus-26-train	بمقدورك أن ترى واحداً عند " كارينجي هول " .	بامكانك تشوف واحد بقاعة كارنيجي.
8250	corpus-6-test-corpus-26-train	لستُ معتمداً قانونياً .	أنا مش مؤهل.
8271	corpus-6-test-corpus-26-train	ما هو الصنف المميز للمحل ؟	شو هو الصنف المميز بالمحل؟
8280	corpus-6-test-corpus-26-train	أودّ حجز موعد مع طبيب .	أنا بدي موعد عند الدكتور.
8291	corpus-6-test-corpus-26-dev	تُرى هل ثمة مائدة متاحة بالقرب من النافذة لسبعة أشخاص الليلة .	يا ترى في طاولة فاضية أحجزها قريبة من الشباك لسبع اشخاص المسا.
8295	corpus-6-test-corpus-26-train	أنت لا تمانع في حضوري إلى منزلك ؟	إنت ما عندك مشكلة اني آجي على بيتك؟
8305	corpus-6-test-corpus-26-train	يبدو أن ثمة مجالات للتحسينات .	شكله في مجال للتحسين.
8316	corpus-6-test-corpus-26-train	أين مترو الأنفاق ؟	وين المترو؟
8334	corpus-6-test-corpus-26-train	هل عندكم منه بحجم أصغر ؟	عندكو منه سايز أصغر؟
8338	corpus-6-test-corpus-26-train	أين يمكنني الحصول على أسبرين ؟	من وين بقدر أجيب أسبيرين؟
8342	corpus-6-test-corpus-26-train	ذلك الحد الأدنى للسعر .	هيك أقل سعر.
8349	corpus-6-test-corpus-26-train	من فضلك اعطني تصريحاً سارياً لمدة أسبوع .	لو سمحت أعطيني اذن لمدة أسبوع.
8355	corpus-6-test-corpus-26-train	هذا زميلي .	هاذ زميلي.
8358	corpus-6-test-corpus-26-train	أي نوع من البنزين هناك ؟ السوبر ، أم العادي ، أما الخالي من الرصاص ؟	شو نوع البنزين اللي هناك؟ سوبر، عادي، ولا خالي من الرصاص؟
8368	corpus-6-test-corpus-26-train	هنا واحد .	هون واحد.
8371	corpus-6-test-corpus-26-train	أنا مقبل على الإصابة بنوبة برد .	حاسس حالي رح أرشح.
8409	corpus-6-test-corpus-26-test	إنه مغلق في أيام الاثنين ، ولكن أي يوم آخر سيكون لا بأس به . أعتقد أنه يُفتح من التاسعة حتى الخامسة .	بسكر أيام الإثنين، بس أي يوم ثاني بكون فاتح. بظن أنه بفتح من التسعة للخمسة.
8418	corpus-6-test-corpus-26-train	إنه سمك ثعبان مشوي مع مرقة خاصة فوق سلطانية من الأرز .	هاذ سمك الانقليس مع صلصة خاصة محطوطة فوق سلطانية الرز.
8435	corpus-6-test-corpus-26-train	دعونا نحتفل ، هكذا قال وآخذني إلى بار . وقال إنه سيُجري مكالمة هاتفية وغادر ولم يعد أبداً وتحملت أنا وحدي عبء فاتورة ضخمة .	"خلينا تحتفل" هيك قال وأخذني على البار. حكى انه رايح يعمل مكالمة وراح وما رجع إجى أبداً وأنا تورطت بفاتورة كبيرة.
8454	corpus-6-test-corpus-26-train	كم تكلّف هي لكل جالون ؟	كم سعر الغلون الواحد؟
8456	corpus-6-test-corpus-26-train	كان معي جواز سفري وبطاقتي الائتمانية في جيبي .	كان معي جواز السفر والفيزا بجيبتي.
8485	corpus-6-test-corpus-26-train	الحجوزات في السابعة ، تحت اسم مانو .	حجوزات الساعة سبعة، بإسم مانو.
8495	corpus-6-test-corpus-26-train	ألا ترغب في فنجان شاي ؟	ما بدك تشرب كاسة شاي؟
8497	corpus-6-test-corpus-26-dev	هل يمكن أن تدلّني أين أجد القنصلية اليابانية ؟	ممكن تحكيلي وين بقدر ألاقي القنصلية اليابانية؟
8509	corpus-6-test-corpus-26-train	هل هناك طبيب للفندق أو واحد على صلة بالفندق .	في دكتور للفندق أو واحد ع علاقة بالفندق؟
8516	corpus-6-test-corpus-26-train	إنه يقوم دائماً بالتسوق في شارع " بوند " .	هو دايماً بتسوق من شارع بوند.
8527	corpus-6-test-corpus-26-train	جريدة باللغة الإنجليزية ، لطفاً .	جريدة بالانجليزي، لو سمحت.
8535	corpus-6-test-corpus-26-train	هل هناك مكان يتم فيه عزف الموسيقي الريفية ؟	ما في أي مكان بعزف ألحان ريفية؟
8539	corpus-6-test-corpus-26-test	أودّ مراجعة ممتلكاتي الثمينة .	حاب أشيك على اشيائي الغالية.
8543	corpus-6-test-corpus-26-train	أي منتجات صوفية أخرى ؟	في منتجات صوف ثانية؟
8551	corpus-6-test-corpus-26-train	كم تكلف الملاءة الواحدة ؟	كم حق العباية الوحدة؟
8574	corpus-6-test-corpus-26-train	حسنا ، اضغط تسعة وصفر واحد واحد ، ثم الكود الخاص بالبلد ورقم الهاتف .	طيب، إكبس تسعة وصفر واحد واحد، وبعدين الكود تبع البلد ورقم التلفون.
8577	corpus-6-test-corpus-26-train	هل يمكن أن أحصل على كوكاكولا دايت ؟	ممكن تعطيني كولا دايت؟
8584	corpus-6-test-corpus-26-train	هل بإمكاني إجراء طلبية ؟	بقدر اطلب؟
8595	corpus-6-test-corpus-26-train	استمتعنا بجولة لطيفة بالسيارة . شكراً لك .	انبسطنا بلفة لطيفة بالسيارة. شكراً الك.
8604	corpus-6-test-corpus-26-test	معذرةً . هل لي بأن انتهي من هذا الأمر ؟	عفواً، ممكن نخلص من هاد الموضوع؟
8610	corpus-6-test-corpus-26-train	إجمالي سكان اليابان حوالي مائة وثلاثين مليوناً .	العدد الكلي لسكان اليابان حوالي مية وثلاثين مليون.
8618	corpus-6-test-corpus-26-train	أود استئجار شمسية .	بدي استأجر شمسية.
8625	corpus-6-test-corpus-26-train	أجل ، وأودّ محاسبة المطلوب هاتفياً على قيمة المكالمة .	صح، وأنا بدي احاسب يلي رنيت عليه على حق المكالمة.
8636	corpus-6-test-corpus-26-train	محفظة بها مائة دولار وبطاقتان ائتمانيتان .	محفظة فيها مية دولار وبطاقتين فيزا.
8637	corpus-6-test-corpus-26-train	الماء أسخن من اللازم .	المي كثير حامية.
8675	corpus-6-test-corpus-26-train	أنت هنا .	إنت هون.
8688	corpus-6-test-corpus-26-dev	إبريق من القهوة ، لطفاً .	بكرج قهوة، لو سمحت.
8690	corpus-6-test-corpus-26-train	غير محتمل بدرجة كبيرة .	بنطاقش بدرجة كبيرة.
8696	corpus-6-test-corpus-26-train	معدتي تؤلمني بعد الوجبات .	معدتي بتالمني بعد الوجبات.
8734	corpus-6-test-corpus-26-train	عظيم ، ذلك مكان لطيف .	وااااو، هاذ مكان حلو.
8741	corpus-6-test-corpus-26-train	ربما كان يعاني سّدَّة تنفسية .	ممكن عنده صعوبة بالتنفس.
8749	corpus-6-test-corpus-26-train	هل قرّرتَ ؟	قررت؟
8788	corpus-6-test-corpus-26-train	إذا كنت تودّ ، بإمكاننا الاستراحة هنا .	إذا إنت حاب، ممكن نستريح هون.
8791	corpus-6-test-corpus-26-test	أنا فقدت أثر بريد مسجّل .	ضيعت أثر رسالة مسجلة.
8803	corpus-6-test-corpus-26-train	ليس بمقدورك تغيير وظيفتك بسهولة .	ما بتقدر تغير شغلك ببساطة.
8805	corpus-6-test-corpus-26-train	ما هي المحطة التالية ؟	شو هو الموقف الجاي؟
8811	corpus-6-test-corpus-26-train	حسنا ، ولكن ليس منطقة المقاعد المكشوفة . فاليوم شديد الحرارة .	طيب ، بس مش على مكان الكراسي المكشوفة. اليوم كثير شوب.
8823	corpus-6-test-corpus-26-dev	اهبط هنا ، وانتقل إلى الحافلة رقم ستة .	إنزل هون، وروح على باص رقم ستة.
8824	corpus-6-test-corpus-26-dev	علىّ أن ألحق بطائرة العاشرة صباحاً .	لازم ألحق طيارة الساعة عشرة الصبح.
8827	corpus-6-test-corpus-26-train	مازلت أشعر بالرغبة في القيء .	بعدني حاس حالي بدي أراجع.
8833	corpus-6-test-corpus-26-train	لا أريد أي شيء يكون كبير الحجم .	ما بدي أي اشي ظخم.
8840	corpus-6-test-corpus-26-train	الحساب ، من فضلك .	الحساب، لو سمحت.
8844	corpus-6-test-corpus-26-test	كم يكلف عش الغراب الطازج ؟	كم سعر الفطر الطازا؟
8850	corpus-6-test-corpus-26-train	التكلفة ، من فضلك . هل تقبلون بطاقة فيزا ؟	الحساب ، لو سمحت. يتقبلو بطاقة فيزا؟
8851	corpus-6-test-corpus-26-train	اليوم سأذهب لأرى كيف يبدو الحيّ الصين .	اليوم راح أروح أشوف كيف منظر الحيّ الصين.
8880	corpus-6-test-corpus-26-train	اثنان صفر اثنان تسعة ثلاثة تسعة ستة سبعة صفر صفر .	اثنين صفر اثنين تسعة ثلاثة تسعة ستة سبعة صفر صفر.
8900	corpus-6-test-corpus-26-train	أرغب في خلع أسناني .	أنا حاب أقلع سناني.
8905	corpus-6-test-corpus-26-train	أرغب في حقيبة مستحضرات تجميل .	بدي شنتة مكياج.
8907	corpus-6-test-corpus-26-dev	لا أدري كم من النقود يجب علىّ تركه كبقشيش ؟	ما بعرف قديش لازم أترك بغشيش.
8914	corpus-6-test-corpus-26-train	أين يمكنني مشاهدة عَرْض " شبح الأوبرا " ؟	وين ممكن أحضر عرض" شبح الأوبيرا"؟
8915	corpus-6-test-corpus-26-train	أريد شراء تذكارات لأصدقائي . أيمكن أن تُوصي ببعض منها ؟	بدي أشتري هدايا تذكارية لأصحابي. ممكن تنصحني بإشي؟
8918	corpus-6-test-corpus-26-train	بطريقة أبطأ ، من فضلك .	بشكل أبطأ ، لو سمحت.
8919	corpus-6-test-corpus-26-dev	ما هو متوسط أسعاركم للفاكس الدولي كل شهر ؟	كم معدل تكلفة الفاكس الدولي كل شهر؟
8947	corpus-6-test-corpus-26-train	مقلية على الجانبين ، من فضلك .	مقلي من الجهتين، لو سمحت.
8966	corpus-6-test-corpus-26-dev	حسنا ، هذا يبدو واضحاً تماماً . كلاكما ، رجاءً ، أعطياني ما يخصكما من رُخص وشهادات تسجيل . وأنت يا بُني ، يؤسفني أننا مضطرون لأن نجري لك اختباراً لفحص نسبة الكحول .	طيب، هاد شكله واضح كثير، إنتو الثنين لو سمحتوا أعطوني رخصكو وتسجيلكو. وأنت يا إبني، اسف لازم نعملك فحص نسبة كحول.
9011	corpus-6-test-corpus-26-train	سيكون جاهزا بعد غد في المساء .	راح يكون جاهز بعد بكرا المسا.
9022	corpus-6-test-corpus-26-train	هل هذا مصنوع من القطن ؟	هاذ مصنوع من القطن؟
9029	corpus-6-test-corpus-26-dev	عندي الدواء الخاص بي .	عندي الدوا تاعي.
9034	corpus-6-test-corpus-26-train	ما الذي يمكن أن أراه في هذه الجولة ؟	شو بقدر أشوف بهاي الرحلة؟
9041	corpus-6-test-corpus-26-train	نعم , يوجد مشروب على الأقل .	اه، هون في شراب واحد على الأقل.
9051	corpus-6-test-corpus-26-train	ما تكلفة هذا في اليوم ؟	قديش تكلفته ليوم واحد؟
9061	corpus-6-test-corpus-26-dev	هل تتوقف هذه الحافلة بالقرب من الفندق ؟	هاد الباص بوقف قريب من الفندق؟
9073	corpus-6-test-corpus-26-train	أريد اسطوانة مدمجة .	بدي سي دي.
9077	corpus-6-test-corpus-26-train	توجد رحلات جوية على شركات جال وانا التي تقلع في الساعة العاشرة وخمسة وخمسين دقيقة . ولكن , للأسف كلتا الرحلتين محجوزتان .	في طيارات على شركات جال وانا اللي بتغادر الساعة عشرة وخمسة وخمسين دقيقة. بس، للأسف الطيارتين مفللات.
9094	corpus-6-test-corpus-26-train	تناسبني تماما .	مناسبيتني كثير.
9098	corpus-6-test-corpus-26-train	هل يمكن أن نحجز طاولة لخمسة أشخاص ؟	ممكن نحجز طاولة لخمس أشخاص؟
9100	corpus-6-test-corpus-26-train	إنها لا تفهم الإنجليزية مطلقا .	هي ما بتفهم إنجليزي بالمرة.
9126	corpus-6-test-corpus-26-dev	من فضلك , اصرف شيكا سياحيا .	لو سمحت اصرفلي شيك سياحي.
9150	corpus-6-test-corpus-26-train	هل يمكن أن تعتني بها من الساعة التاسعة صباحا حتى الثالثة ؟	ممكن ادير بالك عليها من الساعة تسعة الصبح للساعة ثلاثة؟
9160	corpus-6-test-corpus-26-train	ما تكلفة البريد الجوي إلى اليابان ؟	قديش تكلفة البريد الجوي لليابان؟
9176	corpus-6-test-corpus-26-train	لقد أُغلق علي الباب . هل يمكن أن تفتح بابي , من فضلك ؟	ييي تسكر علي الباب . بتقدر تفتحلي الباب، لو سمحت؟
9211	corpus-6-test-corpus-26-train	ما هي أفضل جولة حتى أرى أشهر الأماكن ؟	شو هي أحسن رحلة عشان أشوف أشهر الأماكن؟
9229	corpus-6-test-corpus-26-test	هل هناك مضيفات يتحدثن اليابانية ؟	في أي مضيفات بحكن ياباني؟
9242	corpus-6-test-corpus-26-test	كم حقيبة يمكن أن أحضرها معي في الطائرة ؟	كم شنتة بقدر آخذها معي على الطيارة؟
9263	corpus-6-test-corpus-26-train	لا يا سيدي . هذه الظهيرة محجوزة بالكامل . ومع ذلك يمكن أن تحجز غدا .	لا، يا أستاذ، اليوم بعد الظهر كله محجوز. لكن بتقدر تحجز بكرا .
9267	corpus-6-test-corpus-26-train	سأذهب كي أسأل البواب عن الأجرة المناسبة .	رايح اسأل البواب عن الأجرة الصحيحة.
9303	corpus-6-test-corpus-26-train	أنا حقا آسف .	أني جد آسف.
9308	corpus-6-test-corpus-26-train	عندنا حفلة مساء الجمعة . لماذا لا تنضم لنا ؟	عنا حفلة يوم الجمعة بالليل. ليش ما تيجي معنا؟
9312	corpus-6-test-corpus-26-train	حسنا , حجرتك يا آنسة هي رقم تسعة صفر ثمانية . هذا مفتاحك .	طيب، غرفتك يا آنسة هي تسعة صفر ثمنية. هاذ مفتاحك.
9316	corpus-6-test-corpus-26-dev	من المهم جدا أننا نستطيع الوصول إلى المواد الخام التي نحتاجها في المشروع .	اشي كثير مهم إنه قدرنا نوصل لمجموعة المواد الأساسية اللي راح نحتاجها للمشروع.
9324	corpus-6-test-corpus-26-train	معذرة , ضابط ؟	عفواً، ضابط؟
9325	corpus-6-test-corpus-26-train	هل هذا القطار يتجه مباشرة إلى إدنبره ؟	هاد القطار بروح مباشرة على إدنبره؟
9329	corpus-6-test-corpus-26-train	هل يدخل هذا في حدود المعفي من الضرائب ؟	هاظ معفي من الضرايب؟
9337	corpus-6-test-corpus-26-train	أخرج متعلقاتي الثمينة , من فضلك .	طلع اشيائي الغالية برا، لو سمحت.
9358	corpus-6-test-corpus-26-train	كيف يكون الزحام في مثل تلك الجولات ؟	قديش بكون في زحمة في مثل هاي الرحلات؟
9367	corpus-6-test-corpus-26-train	أود أن أشتري بعض التذكارات . هل يوجد هنا محل مناسب ؟	أني حاب أشتري شوية هدايا تذكارية. في محل مناسب قريب من هون؟
9372	corpus-6-test-corpus-26-train	إلى متى تظل مفتوحة ؟	لأي ساعة بتظل فاتحة؟
9384	corpus-6-test-corpus-26-train	إنه في الخارج الآن .	هو برا هسا.
9385	corpus-6-test-corpus-26-train	مايومي , هل تسمح أن تملأ هذه الورقة بتوقيعك ؟	مايومي، ممكن تعبيي هاي الورقة بتوقيعك؟
9431	corpus-6-test-corpus-26-train	إليك إحداها يا سيدي .	هي واحده إلك يا أستاذ.
9432	corpus-6-test-corpus-26-train	ليس لدي أمتعة للتفتيش .	ما عندي شناتي للتفتيش.
9446	corpus-6-test-corpus-26-test	بالتأكيد , كن على راحتك .	أكيد، كون على طبيعتك
9450	corpus-6-test-corpus-26-train	أنا هنا في مهمة إعلامية .	أنا هون بشغل إعلامي.
9463	corpus-6-test-corpus-26-train	هل لديكم أفلام للصيف ؟	عندكو أفلام للصيف؟
9481	corpus-6-test-corpus-26-train	متى يأتي القطار التالي المتجه إلى واشنطن العاصمة ؟	متى بوصل القطار الجاي اللي رايح لواشنطن العاصمة؟
9494	corpus-6-test-corpus-26-test	الملابس الطويلة هي الموضة الآن .	الأواعي الطويلة هي الموظا هسا.
9516	corpus-6-test-corpus-26-train	سأعود إلى اليابان الاثنين المقبل .	أنا راح أرجع على اليابان الإثنين الجاي.
9526	corpus-6-test-corpus-26-train	هل يمكنني الحصول على خريطة للمترو ؟	ممكن أشوف خريطة للمترو؟
9542	corpus-6-test-corpus-26-train	هل هو طريق طويل ؟	هو الطريق طويل؟
9560	corpus-6-test-corpus-26-train	هل يمكنك تبديل هذه بواحدة جديدة ؟	ممكن تبدلي هاي بوحدة جديدة؟
9576	corpus-6-test-corpus-26-train	شخصان .	شخصين.
9579	corpus-6-test-corpus-26-test	أين يمكنني أن أستعيد أمتعتي ؟	من وين بقدر آخذ شنتاتي؟
9581	corpus-6-test-corpus-26-train	لا أشعر براحة . هل يمكنني حني مقعدي ؟	مش مرتاح . بقدر أنزل الكرسي تبعي؟
9604	corpus-6-test-corpus-26-train	الساعة الحادية عشر وخمس وأربعون دقيقة في الصباح .	الساعة احدعشروخمس واربعين دقيقة في الصبح.
9605	corpus-6-test-corpus-26-train	هلا أرشدتني إلى مطعم مفضل بين الشبان ؟	ممكن ادلني على مطعم معروف بين الشباب؟
9606	corpus-6-test-corpus-26-train	كانت سيارته تسير بكامل سرعتها .	سيارته كانت ماشية على اعلى سرعة.
9611	corpus-6-test-corpus-26-dev	هل بإمكاني ترك رسالة ؟ إنني أتصل للتأكيد على موعدي مع السيد إيبرت الأربعاء المقبل في الحادية عشرة صباحاً .	ممكن أترك رسالة؟ أنا بتصل عشان اأكد على موعدي مع الإستاذ إيبرت يوم الأربعاء الجاي الساعة احدعش الصبح.
9628	corpus-6-test-corpus-26-dev	هل يمكنك بطريقة ما أن تصف لي مرضك بالإنجليزية ؟	بتقدر بأي طريقة تشرحلي مرضك بالإنجليزي؟
9634	corpus-6-test-corpus-26-test	هلا أرسلت تاكسي إلى المدخل الرئيسي لـ ويستمانستر مول ؟	ممكن تودي تكسي للمدخل الرئيسي بويستمانستر مول؟
9651	corpus-6-test-corpus-26-train	كم عدد المرات التي سأغير فيها القطارات للوصول إلى هناك ؟	كم قطار رح اركب عشان أوصل هناك؟
9657	corpus-6-test-corpus-26-train	هل هذا صواب ؟ دعني أتحقق . أوه ، أسف بشدة آنسة تاكاناو . هذا خطأنا . إليك فاتورتك الجديدة . هلا تفضلت بالتوقيع هنا ، من فضلك ؟	هاد صح؟ خليني اتأكد. أووه، أنا جد آسف، انسة تاكاناو. هاد غلطنا. هون فاتورتك الجديدة. ممكن توقعي هون، لو سمحتي؟
9673	corpus-6-test-corpus-26-train	الباقي خمسة دولارات ، من فضلك .	الباقي خمس دولرات، لو سمحت.
9683	corpus-6-test-corpus-26-train	سدادة حوض الاستحمام لا تقفل بالكامل .	سدادة البانيو ما بتسكر على الأخير.
9687	corpus-6-test-corpus-26-train	إنها مجرد هدية تعبيرا عن تقديري .	هاي مجرد هدية تعبير عن تقديري.
9688	corpus-6-test-corpus-26-train	هلا ملأت هذا النموذج ؟	ممكن تعبي هاذ النموذج؟
9695	corpus-6-test-corpus-26-test	ماذا عن هذه النماذج البلاستيكة ؟	شو رأيك بموديلات البلاستك هاي؟
9701	corpus-6-test-corpus-26-train	ما هي الماركات التي توجد لديك ؟	شو الماركات اللي عندك؟
9702	corpus-6-test-corpus-26-train	الكعب عالي جدا بالنسبة لي .	هاد الكعب كثير عالي بالنسبة إلي.
9710	corpus-6-test-corpus-26-test	اقفل الباب من الداخل وأنا خارج الغرفة .	سكر الباب من جوا وانا طالع من الغرفة.
9730	corpus-6-test-corpus-26-train	كم المدة التي قضيتها في باريس ؟	قديش قعدت بباريس؟
9732	corpus-6-test-corpus-26-train	هل يمكنني الحصول على طوابع بريدية لثلاث بطاقات بريدية جوية لليابان ؟	ممكن أوخذ طوابع بريد لثلث رسايل بالبريد الجوي على اليابان؟
9746	corpus-6-test-corpus-26-train	تتهجي جي أوه آر أوه اتش .	بتنلفظ جي أوه آر أوه اتش.
9747	corpus-6-test-corpus-26-train	هل تبغي شراباً ؟	بتحب تشرب إشي؟
9748	corpus-6-test-corpus-26-train	استلقي هنا .	تمدد هون.
9752	corpus-6-test-corpus-26-train	اجعلها برقية عاجلة ، من فضلك .	خليها رسالة عاجلة، لو سمحت.
9788	corpus-6-test-corpus-26-train	طبقاً لتقرير الطقس ، فإن غداً سيشهد سقوط جليد .	بناءً على النشرة الجوية، راح تثلج بكرا.
9792	corpus-6-test-corpus-26-train	أبغي كرة .	بدي طابة.
9822	corpus-6-test-corpus-26-train	بكل تأكيد . سنكون سعداء لفعل هذا .	أكيد. راح نكون مبسوطين نعمل هيك.
9829	corpus-6-test-corpus-26-train	هاي ، كتاب كوميدي ماليزي . سأشتري واحداً لآخذه إلى المنزل كقطعة محادثة .	هاي، كتاب ماليزي كوميدي. راح أشتري واحد عشان آخذه على الدار مثل كتاب محادثة.
9862	corpus-6-test-corpus-26-train	الطريق إلى النجاح هو " جينمياكو " حقاً ؟	الطريق للنجاح ل " جينمياكو"، صح؟
9866	corpus-6-test-corpus-26-dev	سأصل إلى فندقكم في حوالي الساعة التاسعة مساءاً .	راح أوصل لفندقكم حوالي الساعة تسعة بالليل.
9885	corpus-6-test-corpus-26-train	يوجد لدى حوالي ألفي وخمسمائة دولار بالين الياباني .	أنا معي حوالي ألفين وخمسميت دولر بالين الياباني.
9903	corpus-6-test-corpus-26-train	نعم ، نحن تفعل . سأريك بعضاً .	اه، إحنا منعمل. راح أورجيك شوي.
9906	corpus-6-test-corpus-26-train	أبغي بعض الأقراص المنومة .	بدي حبوب منوم.
9910	corpus-6-test-corpus-26-train	سأكون هنا حتى التاسعة . يحدوني الأمل أن تتمكن من القبض على المجرم في أقرب وقت ممكن .	راح أظل هون للساعة تسعة. بتمنى إنكم تمسكوا المجرم بأسرع وقت.
9945	corpus-6-test-corpus-26-train	إنني على يقين أن المجرم قريب .	أنا متأكد إنه المجرم قريب.
9948	corpus-6-test-corpus-26-train	عشرة طوابع من فضلك .	عشر طوابع لو سمحت.
9949	corpus-6-test-corpus-26-train	أصبت بالتهاب في الحلق .	التهب حلقي .
9955	corpus-6-test-corpus-26-train	احتاج إلى بعض الهدايا التذكارية من نيويورك .	أنا بدي شوية هدايا تذكارية من نيويورك.
9969	corpus-6-test-corpus-26-train	إنني أسجل لخروجي من الفندق . هلا أرسلت خادماً إلى أعلى ؟	أني بعمل تشيك اوت. ممكن تودي عامل لفوق؟
9979	corpus-6-test-corpus-26-train	توقفت ساعتي .	ساعتي وقفت.
9983	corpus-6-test-corpus-26-train	أوه ، أهي كذلك ؟ كيف تفضلها ؟	أووه، هي هيك؟ كيف بتحبها؟
10006	corpus-6-test-corpus-26-train	نحن نفتح في التاسعة صباحاً .	إحنا منفتح الساعة تسعة الصبح.
10032	corpus-6-test-corpus-26-train	أريد كتاب تلوين .	بدي دفتر تلوين.
10037	corpus-6-test-corpus-26-train	أظن أنني مصاب بدوار الجو جواً .	بتوقع إنه عندي دوخة بسبب الطيارة.
10043	corpus-6-test-corpus-26-train	هل يجب أن أذهب على بنك ياباني ؟	لازم أروح على بنك ياباني؟
10045	corpus-6-test-corpus-26-train	يجب أن تغير النقود من البنك .	إنت لازم تصرف المصاري من البنك.
10065	corpus-6-test-corpus-26-train	هل لدينا وقت كاف لإنهاء إجراءات المغادرة ؟	معنا وقت كافي لنخلص إجراءات المغادرة؟
10069	corpus-6-test-corpus-26-train	زوجك أحد أفضل عملائنا .	جوزك واحد من أهم زباينا.
10078	corpus-6-test-corpus-26-train	هل تعرف طبيب أسنان جيد ؟	بتعرف دكتور اسنان كويس؟
10084	corpus-6-test-corpus-26-train	أوه ، يجب أن تخطر القنصلية على الفور .	أوه، لازم تبلغ القنصلية هسا.
10091	corpus-6-test-corpus-26-train	مهزوز ، وليس مضروب .	محرك، مش مخفوق.
10098	corpus-6-test-corpus-26-dev	هل تود منضدة في المطعم الرئيسي أو في غرفة خاصة يا سيدي ؟	سيدي، بتحب طاولة بالمطعم الرئيسي ولا بغرفة خاصة؟
10102	corpus-6-test-corpus-26-train	يذهب عدد كبير من الناس إلى الشاطئ خلال الموسم .	عدد كبير من الناس بروحوا على الشط خلال الموسم.
10107	corpus-6-test-corpus-26-train	وزني حوالي مائة وخمسين رطلاً .	وزني حوالي مية وخمسين كيلو.
10111	corpus-6-test-corpus-26-train	إلى أين يجب علي أن أنقل ؟	لوين لازم أحول؟
10114	corpus-6-test-corpus-26-train	أين مكتب الأشياء المفقودة .	وين مكتب الأشياء المفقودة؟
10116	corpus-6-test-corpus-26-train	هل هناك حافلة تذهب مباشرة إلى هناك ؟	في أي باص بروح هناك مباشرة؟
10125	corpus-6-test-corpus-26-train	هل أحتاج لعلاج خاص ؟	انا بحاجة علاج خاص؟
10129	corpus-6-test-corpus-26-train	هل سأدفع نقداً أم يضاف على الفاتورة ؟	راح ادفع كاش ولا بنزاد عالفاتورة؟
10134	corpus-6-test-corpus-26-test	انتقلنا إلى هذا المنزل منذ عام .	رحلنا لهاظ البيت من سنة.
10155	corpus-6-test-corpus-26-train	كم سيستغرق إصدار التأشيرة لي ؟	قديش الفيزا بدها وقت عشان تطلع؟
10156	corpus-6-test-corpus-26-train	أين غرف الراحة ؟	وين الحمامات؟
10160	corpus-6-test-corpus-26-train	إجمالي المبلغ المطلوب مائتان وثلاثة وأربعون جنيه ، يا سيدتي .	المبلغ الكلي بطلع ميتين وثلاثة وأربيعين جنيه، يا مدام.
10164	corpus-6-test-corpus-26-train	هذه هدية ، هل يمكن أن تلفها لي في ورق لف جميل ؟	هاي هدية. ممكن تلفها بورق هدايا حلو؟
10182	corpus-6-test-corpus-26-train	ياله من منظر . إنها مسالك رائعة الجمال .	ما أحلى المنظر . طرق رائعة الجمال.
10187	corpus-6-test-corpus-26-dev	لقد أصيب أناس .	في ناس إنصابوا.
10191	corpus-6-test-corpus-26-dev	معذرة . أين المحطة هنا ؟	عفواً، وين المحطة اللي هون؟
10224	corpus-6-test-corpus-26-train	نعم ، لدينا حجز لك .	مزبوط، عنا حجز إلك.
10238	corpus-6-test-corpus-26-train	معذرة أريد الذهاب إلى فندقي في المدينة بالحافلة . أين يمكن أن أستقل حافلة ؟	عفواً، أنا بدي أروح على الفندق موجود بالمدينة بالباص. من وين بقدر آخذ باص؟
10243	corpus-6-test-corpus-26-test	دجاج ، من فضلك .	جاج، لو سمحت.
10257	corpus-6-test-corpus-26-train	هذه الغرفة اثنان صفر واحد . أريد أن أطلب إفطار الغد .	هاي الغرفة رقم اثنين صفر واحد. بدي أطلب فطور بكرا.
10272	corpus-6-test-corpus-26-test	ما رأيك في موضوع التحرش الجنسي في مكان العمل ؟	شو رأيك بالتحرشات الجنسية اللي بتصير بمكان الشغل؟
10318	corpus-6-test-corpus-26-dev	عندي شقيقتان .	عندي أختين.
10336	corpus-6-test-corpus-26-dev	رقم الرحلة اثنان صفر ثمانية ، إلى طوكيو .	رحلة رقم اثنين صفر ثمنية، لطوكيو.
10354	corpus-6-test-corpus-26-train	إذن دعنا نبطنها من الداخل .	معناته خلينا نحشيها من جوا.
10366	corpus-6-test-corpus-26-test	دعنا نجتمع لنبحث الأمر أكثر .	خلينا نلتقي عشان اناقش هاظ الموضوع أكثر.
10372	corpus-6-test-corpus-26-train	كيف تحب أن يصفف شعرك اليوم ؟	كيف بدك يسرحلك شعرك اليوم؟
10403	corpus-6-test-corpus-26-train	هل يمكن أن تقول لي ذلك بعبارة أخرى ؟	بتقدر تحكيه بجملة غير؟
10408	corpus-6-test-corpus-26-train	سوف استخدم ما يوجد عندكم .	رح استخدم اللي موجود عندكو.
10411	corpus-6-test-corpus-26-train	نريد مائدة بالقرب من المسرح .	بدنا طاولة قريبة عن المسرح.
10416	corpus-6-test-corpus-26-train	أنا بحالة جيدة . حسنا , هل أنت ذاهب إلى مكان ما ؟	أنا مرتاح. زين, رايح على وين؟
10433	corpus-6-test-corpus-26-train	إن ارتفاعه ألفان وأربعمائة متر .	إنو ارتفاعه ألفين وأربعمية متر.
10435	corpus-6-test-corpus-26-train	ادخل . من فضلك ضعها على المائدة هناك .	أدخل. لو سمحت حطها على الطاولة هنيك.
10440	corpus-6-test-corpus-26-train	من فضلك الغي رقم بطاقتي .	من فضلك إلغي رقم البطاقة حقي.
10468	corpus-6-test-corpus-26-train	آسف لقد نفدت ، لكن سوف تردنا بعد بضعة أيام .	معذرة, صارت خلصت، بس رح يرجعوها بعد يومين أو تلاتة.
10473	corpus-6-test-corpus-26-test	هل يمكن أن أخذ بعض القهوة ؟	ممكن أخذ شوية قهوة؟
10477	corpus-6-test-corpus-26-train	ليس لدي موعد ، لكن الأمر عاجل .	ما عندي موعد، بس الأمور ضرورية.
10479	corpus-6-test-corpus-26-train	إنه رديء الصنع .	هو مش صنوع منيح.
10480	corpus-6-test-corpus-26-train	أين المصعد ؟	وين الأسانسير؟
10497	corpus-6-test-corpus-26-train	هل لديكم كتيب حول العروض ؟	عندكم كتالوج على العروض؟
10500	corpus-6-test-corpus-26-train	أين مدخل مترو الأنفاق ؟	وين دخلة المترو؟
10504	corpus-6-test-corpus-26-train	لقد أضعت تذكرة الطيران الخاصة بي .	انا ضايع تذكرة الطيران حقتي.
10559	corpus-6-test-corpus-26-train	ألا تستطيع البقاء هنا خلال الإجازة ؟	ما بتقدر تضل هون خلال العطلة؟
10562	corpus-6-test-corpus-26-train	أوه ، آسف لأني أزعجتك .	اووه، معذرة الك ازعجتك.
10563	corpus-6-test-corpus-26-dev	هل يمكن أن تحجزوا في العرض ؟	ممكن تحجزولي بالعرض؟
10565	corpus-6-test-corpus-26-train	هل توجد غرفة استراحة عامة بالقرب من هنا ؟	في غرفة استراحة عامة جنبنا هون؟
10590	corpus-6-test-corpus-26-train	ما هو الإجمالي ؟	شو الإجمالي؟
10593	corpus-6-test-corpus-26-train	هذا جيد للغاية . والآن الأسئلة ، من فضلك .	هاي زينة كتير. هسا الأسئلة، لو سمحت.
10599	corpus-6-test-corpus-26-train	هل لديك أية فكة لعداد الانتظار ؟	عندك عملة للبارك ميتر؟
10617	corpus-6-test-corpus-26-test	أكثر منتجاتنا بيعت عبر السنوات الأربع الماضية هي الآلة الناسخة طراز أ . أكس أربعة خمسة صفر .	أغلب اللي بعناه من منتجاتنا على مرّ الأربع سنين اللي فاتت هي الآلة الناسخة، طراز أ . أكس أربعة خمسة صفر.
10645	corpus-6-test-corpus-26-train	هل انعطف يساراً ؟	بدي ألف يمين؟
10662	corpus-6-test-corpus-26-test	هل توجد مضيفات يتحدثن اليابانية ؟	فيه مضيفات بتحكي ياباني؟
10670	corpus-6-test-corpus-26-train	سعر رائع ، أليس كذلك ؟	سعر حلو، مو هيك؟
10680	corpus-6-test-corpus-26-train	لابد أن تأخذها تسعة وتسعون مرة في اليوم ، قبل الوجبات .	لازم تاخذها تسعة وتسعين مرة باليوم، قبل الأكل.
10707	corpus-6-test-corpus-26-train	أحبه فعلاً .	بحبه فعلا.
10733	corpus-6-test-corpus-26-train	أريد حامل ثلاثي .	بدي حامل ثلاثي.
10736	corpus-6-test-corpus-26-dev	أريد سترة رياضية .	بدي جاكيت رياضي.
10749	corpus-6-test-corpus-26-dev	يمكنك أن تمكث في منزلي .	ممكن تفضل تقعد ببيتي.
10753	corpus-6-test-corpus-26-test	هل يمكن أن أرجع ظهر مقعدي إلى الخلف ، من فضلك .	بتقدر تدير ظهر كرسيي لورا، لو سمحت؟
10756	corpus-6-test-corpus-26-train	عظيم . كنت أبحث عن سيارة أجرة لكن هذا أفضل .	كتير حلو. كنت قاعد بدور على تاكسي بس هاي احسن.
10760	corpus-6-test-corpus-26-train	معطف رائع . هل هو صناعة بريطانية ؟	جاكيت حلو. هاد صنع بريطاني؟
10778	corpus-6-test-corpus-26-train	أريد الذهاب إلى مركز هارفارد . هل يمكن أن تخبرني عندما نصل إلى هناك ؟	بدي اروح على مركز هارفارد. ممكن تقلي لما نوصل هناك؟
10790	corpus-6-test-corpus-26-train	بالغان وطفلان ، من فضلك .	رجالين وضوجين، لو سمحت.
10817	corpus-6-test-corpus-26-train	ما هو السعر ؟	شو السعر؟
10824	corpus-6-test-corpus-26-train	كان فيلم " حرب الكواكب " أكثر الأعمال شعبية عام ألف وتسعمائة وأربعة وثمانون .	كان فيلم "حرب الكواكب" من أشهر الأفلام سنة ألف وتسعمائة وأربعة وثمانون.
10830	corpus-6-test-corpus-26-train	أين قسم غير المدخنين ؟	وين القسم اللي الناس ما بتتدخن فيه؟
10831	corpus-6-test-corpus-26-train	حرف " ت " " كما في توم ، نعم ها هي لدي هنا ، تارو .	الحرف " ت " "زي في توم، ايوة هاي عندي هون، تارو."
10848	corpus-6-test-corpus-26-test	أظن أنه بديع المنظر .	بظن انه منظره صاير حلو.
10851	corpus-6-test-corpus-26-test	أريد بعض التفاح ، من فضلك .	بدي شوية تفاح، لو سمحت.
10869	corpus-6-test-corpus-26-train	ما فائدة هذا ؟	شو فايدة هاد؟
10882	corpus-6-test-corpus-26-train	أي بطاقات ائتمانية تقبلون ؟	شو نوع الفيزا معكم يلي بتقبلوها؟
10922	corpus-6-test-corpus-26-train	عندي الكثير من الوقت .	عندي وايد وقت.
10930	corpus-6-test-corpus-26-train	حسنا ، إنه وقت الغداء . هل تحب أن نناقشه على الغداء ؟	ماشي، وقت الاكل صار. بتحب نحكي عنها واحنا ناكل؟
10937	corpus-6-test-corpus-26-dev	لقد سرق مسجل الفيديو من غرفتي .	سرقو مسجل الفيديو من غرفتي.
10950	corpus-6-test-corpus-26-train	ألو ، اسمي أودا . عندي حجز الليلة ، لكن سوف أتأخر في القدوم . لهذا من فضلك اتركوا لي الحجز .	مرحبا، اسمي أودا. عندي حجز هالليلة، بس راح يتأخر وصولي. يرجـى خليكو الحجز لي.
10953	corpus-6-test-corpus-26-train	هل هذا الحذاء متين ؟	هاذ البوط قوي؟
10955	corpus-6-test-corpus-26-test	من فضلك قل له أنني أنتظر مكالمته .	من فضلك قللو أني باستنا زنغته.
10964	corpus-6-test-corpus-26-train	يقولون إن الأنفلونزا منتشرة هناك .	بيقولوا انو الإنفلونزا معمية هنيك.
10973	corpus-6-test-corpus-26-train	لقد جاء لتوه .	جا هسا.
10975	corpus-6-test-corpus-26-train	آسف . الحجز كامل لمساء الغد .	معذرة. الحجز متكدس لبكرا الليل.
10976	corpus-6-test-corpus-26-train	أنا مع بعض الأصدقاء .	أنا مع شوية صحاب.
10985	corpus-6-test-corpus-26-train	حسبما يقول جورو ، فاللسيد يامادا طفلان .	زي ما بقول جورو، السيد يامادا عنده طفلين.
10994	corpus-6-test-corpus-26-dev	هل يمكن أن تقول ذلك ثانية ؟	ممكن تعيد هاي ثاني؟
10997	corpus-6-test-corpus-26-train	أريد أن أعرج على برج لندن .	بدي أروح على برج لندن.
11019	corpus-6-test-corpus-26-train	من فضلكم . اربطوا الأحزمة .	من فضلكم، إربطوا الأحزمة.
11027	corpus-6-test-corpus-26-test	كود المنطقة هو ثلاثة . ورقم الهاتف هو اثنان ثلاثة أربعة ثلاثة أربعة صفر صفر .	رقم المنطقة ثلاثة. ورقم التلفون اثنين ثلاثة أربعة ثلاثة اربعة صفر صفر.
11030	corpus-6-test-corpus-26-test	عفواً . هل يوجد أي جسر بالقرب من هنا ؟	معذرة، فيه جسر قريب من هون؟
11041	corpus-6-test-corpus-26-dev	معذرة , أريد استخدام غرفة الراحة .	معليش، بدي أروح على الحمام.
11046	corpus-6-test-corpus-26-train	إنها مشغولة .	هيه مشغولة.
11047	corpus-6-test-corpus-26-test	ملابسه دائماً موضة قديمة .	هدومه دايما موضة قديمة.
11054	corpus-6-test-corpus-26-train	هل لديكم طعام بحري ؟	عندكم اكل بحري؟
11057	corpus-6-test-corpus-26-train	هذا مكلف نوعا ما .	هاي بتكلف شوي.
11058	corpus-6-test-corpus-26-train	أود ذلك ، لكنني أخشى ألا أستطيع هذه المرة .	بدي هيك، بس خايف ما أقدر هالمرة.
11064	corpus-6-test-corpus-26-train	حسنا ، لا أعلم بعد لكنني سوف أحاول بالتأكيد .	ماشي، مش عارف لحد الآن بس رح أحاول أكيد.
11069	corpus-6-test-corpus-26-dev	الملح من فضلك .	الملح لو سمحت.
11082	corpus-6-test-corpus-26-train	من فضلك استعمل غرفة القياس هناك .	من فضلك استخدم غرفة القياس هنيك.
11100	corpus-6-test-corpus-26-train	تسعون دولاراً لتذكرة الذهاب . نقداً أم بالبطاقة ؟	تسعين دولار على تذكرة الروحة. نقدي أو بالكارت؟
11109	corpus-6-test-corpus-26-dev	هل يمكن أن تخلي المنضدة لي ، من فضلك .	ممكن تفرغلي الطاولة، لو سمحت.
11123	corpus-6-test-corpus-26-train	كيف يربي الآباء اليابانيون أولادهم ؟ هل هم صارمون مع أطفالهم ؟	كيف بيربو الآباء اليابانيين ولادهم؟ همة شديدين مع عيالهم؟
11126	corpus-6-test-corpus-26-train	هل يمكن أن تخبرني عن ساعات العمل ؟	ممكن تحكيلي عن ساعات الشغل؟
11131	corpus-6-test-corpus-26-dev	من فضلك لفها كل على حدة .	من فضلك غلفها كل وحدة لحالها .
11161	corpus-6-test-corpus-26-train	معدتي ثقيلة .	معدتي كبيرة.
11171	corpus-6-test-corpus-26-dev	يبدو هذا جيدا ، أين يمكن أن ننتظرك ؟	بتبدو هاي زينة، وين بنقدر نستناك؟
11174	corpus-6-test-corpus-26-train	هل يمكن أن نبدأ اللعب عندما ينتهون ؟	بنقدر نبلش نلعب لما يخلصوا؟
11190	corpus-6-test-corpus-26-train	تعداد سكان اليابان حوالي مائة وعشرينا مليونا .	عدد الناس اللي في اليابان حوالي مية وعشرين مليون.
11197	corpus-6-test-corpus-26-train	املأ البنود الآتية في بطاقة التسجيل .	املي البنود اللي جاية على كرت التسجيل.
11199	corpus-6-test-corpus-26-train	هل يمكن أن أستعيد متعلقات ؟	ممكن أرجع متعلقاتي؟
11240	corpus-6-test-corpus-26-train	هل لديكم أوشحة حريرية ؟ إنني أبحث عن هدية لزوجتي .	عندكم وشاح حرير؟ أنا بدور على هدية للزوجة.
11246	corpus-6-test-corpus-26-train	سوف نحضرها الآن . ما هو رقم غرفتك ؟	رح نجيبها هلا . شو رقم غرفتك ؟
11264	corpus-6-test-corpus-26-test	السيد كوباياشي كان يبحث عنك .	الاستاذ كوباياشي كان عم يدور عليك.
11267	corpus-6-test-corpus-26-train	أريد السفر من شنغهاي إلى هاواي بالباخرة .	بدي أروح من شنغهاي لهاواي عالسفينة.
11278	corpus-6-test-corpus-26-test	هل يمكن أن ترسل أحدا ؟	ممكن تبعت حدا؟
11282	corpus-6-test-corpus-26-train	هل تستطيع تجهيزه بحلول الخامسة من مساء الغد ؟	بتقدر تجهزو عالخمسة بعد بكرة؟
11302	corpus-6-test-corpus-26-train	إنها تستغرق عشر دقائق سيراً على الأقدام .	بتخد عشر دقايق اذا مشيت على رجليك.
11316	corpus-6-test-corpus-26-train	قبل أن ننهي العمل ، هلا أعطيتني بضعة دقائق ؟	قبل ما نخلص الشغل، بتقدر تعطيني شوي دقايق؟
11325	corpus-6-test-corpus-26-dev	أين يمكن أن أوقف سيارتي ؟	وين ممكن أقف سيارتي؟
11336	corpus-6-test-corpus-26-dev	اشعر ببرودة وتؤلمني معدتي جداً .	ماسكني برد ومعدتي عم توجعني كتير.
11342	corpus-6-test-corpus-26-train	ويسكي وماء ، من فضلك . هل لديكم وجبة خفيفة معه ؟	ويسكي ومي، لو سمحت. عندكم سندويشة صغيرة او شيء خفيف معه؟
11343	corpus-6-test-corpus-26-train	كيف يمكنني أن أطفأ الضوء ؟	شو الطريقة عشان أطفي الدواية؟
11360	corpus-6-test-corpus-26-train	هل هو مشغول جدا اليوم ؟	هو مشغول كثير اليوم؟
11374	corpus-6-test-corpus-26-train	أريد بعض الخيط .	بدي شوية خيط.
11375	corpus-6-test-corpus-26-train	اعطني شهادة طبية , من فضلك .	عطيني وصفة طبية ، لو سمحت .
11378	corpus-6-test-corpus-26-train	أود تقصيره ببوصة واحدة من هذه المنطقة .	بدي اقصّره بوسطة وحدة من هادي المنطقة.
11392	corpus-6-test-corpus-26-train	لا أشعر أنني على ما يرام . من فضلك اعطني بعض الدواء .	ما بحس حالي منيح. لو سمحت، اعطيني شوي دوا.
11403	corpus-6-test-corpus-26-train	هل يمكن أن أختر جريدة يابانية , من فضلك ؟	ممكن اختار جريدة يابانية، لو سمحت؟
11404	corpus-6-test-corpus-26-train	حسنا . هل يمكن أن أترك السيارة في أي مكان ؟ ما هي رسوم ركن السيارة ؟	طيب، بقدر اترك السيارة بأي مكان؟ كم الرسوم على ركن السيارة؟
11412	corpus-6-test-corpus-26-train	أي حافلة تذهب إلى وسط المدينة ؟	أي باص رايح عالدوار الرئيسي؟
11420	corpus-6-test-corpus-26-train	هل يوجد أي قطار سريع إلى بوسطن ؟	في أي قطار سريع لبوسطن؟
11435	corpus-6-test-corpus-26-train	من فضلك كن صديقي بالمراسلة .	من فضلك, كون صاحبي عالتواصل.
11438	corpus-6-test-corpus-26-dev	سأقيم مع صديق .	رح اسكن مع صاحبي.
11442	corpus-6-test-corpus-26-train	أنا متأثر للغاية , لا أستطيع البقاء ساكنا .	أنا متأثر كتير, ما قادر أضل ساكت.
11449	corpus-6-test-corpus-26-train	هل يمكن أن أنزل عند فندق هيلتون ؟	ممكن أنزل عند فندق هيلتون؟
11450	corpus-6-test-corpus-26-train	أريدك تنزعه .	بديك تشيله.
11457	corpus-6-test-corpus-26-train	اتجه يساراً في هذا الشارع ثم انعطف عند أول منعطف يمين .	روح يمين بهالشارع وبعدين اتوجه يمين عند اول منعطف.
11462	corpus-6-test-corpus-26-train	أريد أن أعرف إذا كان يمكن شحن مجموعة الأطباق هذه إلى طوكيو .	بدي اعرف اذا بينفع اشحن هالطقم صحون لطوكيو.
11467	corpus-6-test-corpus-26-train	أود بعضاً من القوة الجسدية .	بدي شوي قوة بالجسم.
11478	corpus-6-test-corpus-26-train	ألا يوجد طعام متبل وليس حارا جدا ؟	ما في أكل متبل ومش حار كتير؟
11479	corpus-6-test-corpus-26-train	هل هو قريب لنصل إليه سيراً .	هو قريب عشان نوصلو مشي؟
11491	corpus-6-test-corpus-26-dev	أريد بعض الكريم للأيدي .	بدي شوية كريم للإيد.
11493	corpus-6-test-corpus-26-train	هل يمكن أن تمرر لي الملح ؟	بتقدر تعطيني الملح؟
11500	corpus-6-test-corpus-26-train	أريد الذهاب إلى وول ستريت . كيف أصل إلى هناك ؟	بدي اروح على وول ستريت. كيف بممكن وصل هنيك؟
11541	corpus-6-test-corpus-26-train	الكثير جداً من التمارين يضر بك .	كتير كتير من التمرين بيضر فيك.
11544	corpus-6-test-corpus-26-train	بما في ذلك الإفطار ، والضريبة ، ورسم الخدمة ، سيكون الحساب خمسة أربعون دولارا للشخص الواحد في الليلة .	بتشمل الفطور، الضرايب، ورسم الخدمة، الحساب رح يكون خمسة وأربعين دولار للواحد في الليلة.
11550	corpus-6-test-corpus-26-train	هل تستطيع تصليح هذا ؟	ممكن تصلح هاي؟
11574	corpus-6-test-corpus-26-train	مساء الخير . أهلا .	مسا الخير. أهلين.
11576	corpus-6-test-corpus-26-train	لا أستطيع العثور على أمتعتك .	ما اقدر اعثر على اغراضك.
11595	corpus-6-test-corpus-26-train	سر مباشرة ، من فضلك .	روح ع طول، لو سمحت.
11600	corpus-6-test-corpus-26-train	هل من المأمون شرب الماء الذي هنا ؟	هل آمن نشرب الماء اللي هون؟
11622	corpus-6-test-corpus-26-train	أهه ، هيا . دولارين فقط .	اها، يلا. بس دولارين.
11626	corpus-6-test-corpus-26-train	هلا بدلت هذا الفستان بآخر من مقاس أوسع ؟	ممكن تبدِّل هالفستان بواحد أكبر حجم؟
11631	corpus-6-test-corpus-26-train	حسنا ، هيا نذهب . أستطيع مساعدتك في واجبك المنزلي بعد أن نتناول بعض البيتزا .	ماشي ، يلا نروح. بقدر اساعدك بواجبك المدرسي بعد ما نكل بيتزا شوي.
11633	corpus-6-test-corpus-26-train	نعم ، يا سيد تاناكا هناك رسالتان لك .	أيوة، يا سيد تاناكا، في عندك رسالتين.
11643	corpus-6-test-corpus-26-train	إنه لا يلائمني .	مش مناسبني.
11646	corpus-6-test-corpus-26-train	الغد يوم آخر .	بكرا يوم تاني.
11663	corpus-6-test-corpus-26-train	ربما أستطيع مساعدتك . هل تحتاج إلى فيتامين سي ؟	ممكن اقدر اساعدك . بتحتاج فيتامين سي؟
11689	corpus-6-test-corpus-26-train	إن محفظتي نشلت في القطار .	وحدة سرق محفظتي في القطر.
11704	corpus-6-test-corpus-26-train	إنه بعيد جداً . يحسن بك أن تأخذ سيارة أجرة .	هو بعيد كتير. فضل أكيد تاخذ تكسي.
11708	corpus-6-test-corpus-26-train	أريد مقعداً يطل على الممر ، من فضلك .	بدي كرسي يطل عالممر، لو سمحت.
11709	corpus-6-test-corpus-26-train	أعيش في شقة إيجارها ثمانون ألف ين في الشهر .	بعيش بشقة، الإجارتها ثمانين ألف ين بالشهر.
11714	corpus-6-test-corpus-26-train	هل لي أن أقاطعكم ؟	ممكن أقاطعكم؟
11720	corpus-6-test-corpus-26-dev	أعرض علىّ مقاساً أكبر .	عرض عليي مقاس أكبر.
11734	corpus-6-test-corpus-26-train	معذرة . هل تمانع في أن تبادل المقاعد معي ؟	معلش، بتمانع تبدل معي مكانك؟
11746	corpus-6-test-corpus-26-train	نعم ، بالطبع .	أيوا، أكيد.
11751	corpus-6-test-corpus-26-train	اذهب إلى الناحية وانعطف يساراً عند إشارة المرور .	روح على السوية ولف شمال عند الاشارة.
11754	corpus-6-test-corpus-26-dev	هل تفضل ماسكات للشعر أصغر أم أكبر ؟	بتحبي القناع للشعر أصغر ولا أكبر؟
11767	corpus-6-test-corpus-26-test	أريد غرفة مفردة بحمام لقاء ثمانين دولارا ، من فضلك .	بدي غرفة فردية مع حمام بـثمانين دولار, لو سمحت.
11800	corpus-6-test-corpus-26-train	أريد إيداع مقتنياتي الثمينة في خزينة الفندق .	بدي أودي أغراضي الغالية في صندوق الفندق.
11817	corpus-6-test-corpus-26-dev	هل لديكم غرفة متاحة الليلة ؟	عندكم غرفة فاضية الليلة ؟
11821	corpus-6-test-corpus-26-train	نعم ، ولكن تأكد أن تذكرتك معك .	ايوه، بس تأكد إنه تذكرتك معك.
11862	corpus-6-test-corpus-26-train	لن ينضم للجولة الاختيارية إلا القليل من الناس .	ما رح ينضم للجولة الاختيارية غير شوي من الناس.
11872	corpus-6-test-corpus-26-train	لا تهتم . على أي حال ، خذني من فضلك إلى مركز الحي الصيني . سأحاول أن أجده بنفسي .	ما تشيل هم. يلا، خذني لو سمحت لمركز الحي الصيني. راح احاول ادور الجهة وحدي.
11879	corpus-6-test-corpus-26-train	تشغل أشخاصاً جدد في أبريل .	رح توظف ناس جداد في نيسان.
11880	corpus-6-test-corpus-26-train	أرجو ذلك .	بتمنى هيك.
11885	corpus-6-test-corpus-26-train	اثنان ويسكي مع الماء , من فضلك .	تنين ويسكي مع مية, لو سمحت.
11901	corpus-6-test-corpus-26-train	من الذي يعزف ؟	مين اللي عم يعزف؟
11913	corpus-6-test-corpus-26-dev	هل يمكن أن تتصلوا بي إن عثرتم على حقيبتي ؟	ممكن تحكوا معي لو لقيتوا شنطتي؟
11916	corpus-6-test-corpus-26-train	إلى اليسار ، من فضلك .	على اليسار، لو سمحت.
11932	corpus-6-test-corpus-26-test	هلا وقفت معي لالتقاط صورة ؟	بتقدر توقف معي شوي عشان نصور صورة؟
11938	corpus-6-test-corpus-26-dev	لا . هل تحب الإبلاغ عنه ؟	لا . بدك تبلغ عنو ؟
11949	corpus-6-test-corpus-26-train	هذه السن في المقدمة تؤلمني .	هالسنة في الامام بتوجعني.
11959	corpus-6-test-corpus-26-train	ما هي أحدث ألعاب الكمبيوتر لفتى سنه خمسة عشر عاما ؟	شو أحدث ألعاب الكمبيوتر لولد عمرو خمسة عشر سنة؟
11972	corpus-6-test-corpus-26-train	سنراك في الغد .	رح نشوفك بكرة.
11973	corpus-6-test-corpus-26-test	هل يوجد مطعم أرخص قريب من هنا ؟	في مطعم رخيص قريب من هون؟
11975	corpus-6-test-corpus-26-train	لا ، ولكن شكراً لك . إنني أشعر بتحسن .	لا، بس شكرًا هونيك. أنا حاسس انو صرت أحسن.
11976	corpus-6-test-corpus-26-train	هل لديكم أي خبز ؟	عندكم خبز؟
11977	corpus-6-test-corpus-26-train	ما هو مستوى مهارتك في عزف الكمان ؟	شو مستواك بعزف الكمان؟
11990	corpus-6-test-corpus-26-train	لقد انزلقت قدما صديقي وسقط في الحمام .	قدما صاحبي انزلقوا ووقع بالحمام.
11991	corpus-6-test-corpus-26-train	أريد مطفأة سجائر .	بدي منطفة سجاير.
11997	corpus-6-test-corpus-26-train	حظرت المسيحية وأغلقت البلاد بالنسبة لبقية العالم .	مسكرت المسيحية وسكرت البلاد عن باقي الدنيا.
12005	corpus-6-test-corpus-26-train	ما الكمية التي تريدها ؟	شو الكمية اللي بدك ياها؟
12012	corpus-6-test-corpus-26-train	خلطة جمبري لها ، وكذلك لي .	خليطة جمبري لهي وكمان لي.
12033	corpus-6-test-corpus-26-train	هلاّ جعلت توقيعك هنا والحروف الأولى من اسمك هنا .	هات خلي توقيعك هون وأول حروف اسمك هون.
12035	corpus-6-test-corpus-26-train	لقد أثلج صدري زيارة مقاركم الرئيسية وكذا ما جرى بيننا من مناقشات مهمة . شكراً جزيلاً على ما أبديتموه من تعاون .	فرحت كتير لما زرت مكاتبكم الرئيسية وكمان النقاشات الهمة اللي صارت بيناتنا. كتير شكراً على العون اللي قدمتوه.
12054	corpus-6-test-corpus-26-train	إن غطيطك مزعج .	غطيطك معصبني.
12056	corpus-6-test-corpus-26-train	إن لونها لا يروقني على الإطلاق . هلي يمكنني إرجاعها ؟	لونها مش عاجبني ابداً. ممكن أرجعها؟
12057	corpus-6-test-corpus-26-dev	اخرج من ذلك الباب ، وانتظر عند المحطة رقم ستة .	طلع من هاي الباب، و انطر عند المحطة رقم ستة.
12060	corpus-6-test-corpus-26-dev	دجاج محمر ، من فضلك .	دجاج مشوي، لو سمحت.
12069	corpus-6-test-corpus-26-train	هل لي في بعض الفلفل ؟	ممكن أخذ شوي فلفل؟
12074	corpus-6-test-corpus-26-test	أجل أريد شيئاً أقرؤه .	أيوا بدي إشي أقراه.
12101	corpus-6-test-corpus-26-train	أنا السيد تكاهاشي بالغرفة رقم خمسة تسعة وأربعين . من فضلك أرسل أربع زجاجات من بيرة بودفايزر .	أنا الأستاذ تكاهاشي بالأوضة رقم ٥٩ . لو سمحت بدي أربع بطولين من البيرة بودفايزر.
12131	corpus-6-test-corpus-26-train	هذه سبعون دولار .	هاي سبعين دولار.
12140	corpus-6-test-corpus-26-train	من فضلك اتصل بي في الفندق عندما تجد حقائبي .	من فضلك، كلمني بالفندق لما تلاقي شنطي.
12150	corpus-6-test-corpus-26-train	أريد مكالمة لإيقاظي في الثامنة والنصف صباح غد ، من فضلك .	بدي مكالمة تصحيني الثامنة ونص بالصبح بكرة ، بدي المعروف يا رجاء .
12167	corpus-6-test-corpus-26-train	أجل ، ولكن هذا كثير جدا ، ولقد شبعت بالفعل .	أيوة، بس هاي كتير كثير ، وأنا صرت أكلت كفاية.
12172	corpus-6-test-corpus-26-train	أريد غسيلاً للفم .	بدي أغسل حلقي.
12173	corpus-6-test-corpus-26-train	أشعر بوعكة .	أنا حاسس حالي مريض.
12182	corpus-6-test-corpus-26-train	هل تقدمون تخفيضات كبيرة ؟	بتسووا تنزيلات كبار؟
12193	corpus-6-test-corpus-26-train	طوكيو صفر ثلاثة أربعة مرات تسعة أربعة خمسة ستة سبعة .	طوكيو صفر تلاتة أربعة مرات تسعة أربعة خمسة ستة سبعة.
12240	corpus-6-test-corpus-26-train	فضلا ، ساعدني في العثور على حديقة الحيوان .	من فضلك، ساعدني اعثر على حديقة الحيوانات.
12246	corpus-6-test-corpus-26-train	هلا أخبرتني كيفية تعديلها من فضلك ؟	ممكن تحكيلي كيف اعدلها لو سمحت؟
12247	corpus-6-test-corpus-26-train	متى بالتقريب ستنتهي جولة الحافلة ؟	إمتى تقريبا رح تخلص دورة الباص؟
12254	corpus-6-test-corpus-26-train	أرني كيفية استعمال الهاتف .	وَرِّني كيف بدي استخدم التلفون.
12259	corpus-6-test-corpus-26-train	بالتأكيد . لدينا بعض الماركات الأمريكية الأصلية الجميلة . للكتب .	أكيد. عنا شوية ماركات أمريكية أصلية حلوة. للكتب.
12298	corpus-6-test-corpus-26-train	أريد عامل تشغيل يتحدث اليابانية من فضلك .	بدي شغيل بيحكي ياباني لو سمحت.
12331	corpus-6-test-corpus-26-train	نحن مهتمون بالأزياء .	احنا بنهتم بالأزياء.
12333	corpus-6-test-corpus-26-train	هل يمكنك أن تجر سيارتي ؟	ممكن تجرب سيارتي؟
12345	corpus-6-test-corpus-26-train	أهذه عيادة إف ؟	هاي عيادة إف؟
12364	corpus-6-test-corpus-26-train	مرحبا يا سيدة ياماجوتشي ؟ فريقك على الخط . قبلت دعوتك . استمر من فضلك .	أهلا وسهلا يا سيدة ياماجوتشي، فريقك عم يكلمك. رديت على دعوتك. استمري، من فضلك.
12391	corpus-6-test-corpus-26-test	من أين يسعني شراء تذكرة توصيل بالكوبون ؟	من وين بقدر اشتري تذكرة توصيل بالكوبون؟
12396	corpus-6-test-corpus-26-train	متى نصل إلى لوس أنجلوس ؟	إمتى بنوصل على لوس أنجلوس؟
12403	corpus-6-test-corpus-26-train	سر في نفس الاتجاه حوالي خمس دقائق ثم لف لجهة اليسار .	امشي بنفس الاتجاه حوالي خمس دقايق و بعدين ارجع على الشمال.
12416	corpus-6-test-corpus-26-train	إنه في هذا الطريق في اتجاه الشاطئ .	هوي ع هالشارع طالع على البحر.
12420	corpus-6-test-corpus-26-train	هذا الشاي العشبي يساعد الجسم على استعادة نشاطه .	هاي الشاي العشبي بتساعد الجسم يرجع نشاطه.
12421	corpus-6-test-corpus-26-train	لم تصنع هذه باليابان ، أليس كذلك ؟	ما صنعت هاي باليابان، صح؟
12443	corpus-6-test-corpus-26-train	حسناً . خذ هذا الاتجاه . من فضلك ، سأوصلك إلى غرفتك .	ماشي، خذ هاي الطريقة. لو سمحت، رح أوصلك لغرفتك.
12479	corpus-6-test-corpus-26-train	علىّ مغادرة الفندق قبل الظهر .	لازم اطلع من الفندق قبل الضهر.
12495	corpus-6-test-corpus-26-train	نريد اثنين هامبورجر واثنين قهوة ، من فضلك ، نريد تناولها خارج المحل .	بدنا زوج همبرجر وزوج قهوة، لو سمحت، بدنا ناكلها برة المحل.
12510	corpus-6-test-corpus-26-train	هل يسعني أن استمر في حمل هاتين الحقيبتين ؟	بتسمحلي آكمل حامل هالشنتتين؟
12527	corpus-6-test-corpus-26-train	لقد طلبت لحما لا سمكا . هل يمكنك تغيير هذا ؟	طلبت لحم مش سمك. ممكن تغير هاي؟
12546	corpus-6-test-corpus-26-train	إن طفلي قد أصابه الإعياء الشديد .	طفلي صار مرهق كثير.
12551	corpus-6-test-corpus-26-train	أشعر بالغثيان .	بحس حالي بدي أتقيء.
12556	corpus-6-test-corpus-26-train	هذا الجاكت ليس مقاسي .	هاي الجاكيت مش مقاسي.
12557	corpus-6-test-corpus-26-train	أريد لقاء السيد ويليم .	بدي أشوف الأستاذ ويليم.
12560	corpus-6-test-corpus-26-train	إن بها تشكيلة من سبعة فيتامينات ومعادن .	فيها مزيج من سبع فيتامينات ومعادن.
12562	corpus-6-test-corpus-26-test	إن " السنة " متقلقلة .	ال"سنة" عم تتقلب.
12589	corpus-6-test-corpus-26-train	هل سأسترد ما أنفقت عند عودتي إلى اليابان ؟	رح أرجع اللي صرفته لما أرجع على اليابان؟
12599	corpus-6-test-corpus-26-train	ما هي مكونات هذا الطبق ؟	شو مكونات هالصحن؟
12603	corpus-6-test-corpus-26-train	في أي الدول صنعت هذه .	بأي بلد سووا هاي؟
12608	corpus-6-test-corpus-26-train	أيمكنك الانتهاء من ذلك بعد عشر دقائق ؟	بتقدر تخلص هاي بعد عشر دقايق؟
12611	corpus-6-test-corpus-26-dev	لا أجيد الإنجليزية . هل ثمة من يتحدث اليابانية هنا ؟	أنا مش بعرف أحكي إنجليزي. في حدا بحكي ياباني هون؟
12615	corpus-6-test-corpus-26-train	من اين يمكنني الحصول على مسكوكة لركوب المترو ؟	من وين ممكن أجيب تذكرة لأركب المترو؟
12638	corpus-6-test-corpus-26-train	سنبعث لك بالبريد عشرين عينة إضافية .	رح نبعتلك عالبريد عشرين عينة زيادة.
12644	corpus-6-test-corpus-26-train	لا أعتقد أن ذلك يناسبني فجلدي جاف إلى حد ما .	ما بعتقد انه هاد بلبقلي، جلدي ناشف كثير.
12650	corpus-6-test-corpus-26-train	أيمكنني الحصول على جدول زمني ، من فضلك ؟	ممكن أحصل على جدول الوقت، لو سمحت؟
12658	corpus-6-test-corpus-26-dev	أجل ، أظن أني سوف أنظر .	ايوا، بظن إني رح اطلع.
12671	corpus-6-test-corpus-26-train	تسعة وتسعون دولاراً في الساعة للطفل ؟	تسعة وتسعين دولار بالساعة للطفل ؟
12672	corpus-6-test-corpus-26-train	آسف لقد نفذ هذا الصنف لدينا .	معذرة، هاد النوع خلص عنا.
12677	corpus-6-test-corpus-26-train	لابد أن تكون هادئة .	لازم تكوني هادية.
12678	corpus-6-test-corpus-26-dev	لدي معداتي الخاصة .	عندي أدواتي الخاصة.
12679	corpus-6-test-corpus-26-train	أريد مفتاح الغرفة خمسة صفر ثلاثة ، من فضلك .	بدي مفتاح الغرفة خمسة صفر تلاتة، لو سمحت.
12699	corpus-6-test-corpus-26-test	متى يجري عرض فيلم " رجل المحطة الأخيرة " ؟	إمتى بتيجي عرض فيلم "رجل المحطة الأخيرة"؟
12701	corpus-6-test-corpus-26-train	أين الحلاق ؟	وين الحلاق؟
12708	corpus-6-test-corpus-26-train	في الساعة السابعة ، من فضلك .	بالساعة السابعة ، لو سمحت.
12712	corpus-6-test-corpus-26-train	لقد أتلفت حقيبتي .	دمرت شنتتي.
12713	corpus-6-test-corpus-26-train	لمشاهدة المعالم .	لتشوف المناظر.
12732	corpus-6-test-corpus-26-train	إني من إسبانيا .	أنا من إسبانيا.
12750	corpus-6-test-corpus-26-dev	إن ثمة خطأ ما في بطاقة المفتاح هذه ، أعطني غيره ، من فضلك .	فيها غلطة شكلها بالكارت هاي، عطني وحدة ثانية، الله يخليك.
12755	corpus-6-test-corpus-26-dev	هناك طفح على ذراعي .	في طفح على إدي.
12761	corpus-6-test-corpus-26-train	أرجو أن تبعث هذا بالبريد الجوي إلى اليابان .	بتمنى تبعت هاد بالبريد الجوي لليابان.
12766	corpus-6-test-corpus-26-test	أين أقرب صيدلية ؟	وين أقرب صيدلية؟
12770	corpus-6-test-corpus-26-dev	مزيد من النبيذ ، من فضلك .	زيادة من العنبية، لو سمحت.
12773	corpus-6-test-corpus-26-train	إن الناس ودودون جداً .	الناس حابيين كثير.
12776	corpus-6-test-corpus-26-test	كم عدد المشروبات التي يغطيها السعر ؟	قديش الأشربة اللي السعر بيغطيها؟
12777	corpus-6-test-corpus-26-test	لقد تمكنت من تحقيق ذلك .	قدرت أوصل لهذا الشي.
12782	corpus-6-test-corpus-26-train	أين بوابة ركوب الطائرة بالنسبة لهذه الرحلة ؟	وين باب صعود الطيارة لهاي الرحلة؟
12790	corpus-6-test-corpus-26-test	في حالة إمكان ذلك , احجز منضدة بالقرب من النافذة من فضلك .	لو في امكانية, احجزلي طاولة عند الشباك لو سمحت.
12805	corpus-6-test-corpus-26-dev	هل أعلن بالفعل عن وجوب الصعود إلى الطائرة ؟	هل فعلا اعلنوا انه لازم نصعد على الطيارة؟
12810	corpus-6-test-corpus-26-train	إننا على ارتفاع اثني عشر ألف قدم .	احنا على ارتفاع اتناشر ألف قدم.
12820	corpus-6-test-corpus-26-train	في البداية نود مشاهدة وول ستريت .	بالأول، بدنا نتفرج على وول ستريت.
12822	corpus-6-test-corpus-26-train	أين محطة الحافلة التي تقصد أكسفورد ؟	وين محطة الباص اللي بتروح على أكسفورد؟
12823	corpus-6-test-corpus-26-train	سأنتظر حتى يتاح الجلوس في التراس .	رح أستنا لحتى يصير الجلوس بالتراس ممكن.
12835	corpus-6-test-corpus-26-train	هل يمكننا أن نلقي نظرة على حافظات جلدية ؟	ممكن نتطلع على محافظ جلد؟
12861	corpus-6-test-corpus-26-dev	دعنا نشاهد التلفزيون . فيها مباراة بيسبول .	خلينا نتفرج على التلفزيون. في مباراة بيسبول.
12878	corpus-6-test-corpus-26-train	هل يمكنك كتابة عنوانك في هذا المكان ؟	تقدر تكتب عنوانك هون؟
12884	corpus-6-test-corpus-26-train	أخبرني من فضلك أين أقرب صيدلية .	قولي لي بتكرم أين أقرب صيدلية.
12903	corpus-6-test-corpus-26-train	إلى فندقي ، من فضلك ، إن عنوان فندقي في هذه الورقة .	للفندق تبعي، لو سمحت، العنوان تبع الفندق ع هالورقة.
12905	corpus-6-test-corpus-26-dev	كم مقاطعة هناك بالإضافة إلى طوكيو ؟	أديش محافظات في غير طوكيو؟
12917	corpus-6-test-corpus-26-train	ابقى على الخط وانتظر لحظة من فضلك .	خليك على الخط و استنى شوي من فضلك.
12936	corpus-6-test-corpus-26-train	ماذا تعمل في المعتاد بالمنزل بعد تناول العشاء ؟	شو بتعمل بالعادة بالبيت بعد ما تتعشى؟
12941	corpus-6-test-corpus-26-train	بالتأكيد . متى تود أن تلعب جولف ؟	طبعاً. أميت بدك تلعب جولف؟
12945	corpus-6-test-corpus-26-train	ستكون بالبيت في حوالي الثلاثة .	رح تكون بالدار حوالي الثلاثة.
12952	corpus-6-test-corpus-26-train	أريد أن اتصل هاتفياً بالسفارة اليابانية .	بدي أحكي بالتلفون مع السفارة اليابانية.
12968	corpus-6-test-corpus-26-train	زدني قليلاً .	زيدني شوي.
12969	corpus-6-test-corpus-26-train	من أين تغادر الحافلات لمشاهدة المعالم ؟	من وين بتطلع الباصات حتى نشوف المناظر؟
12973	corpus-6-test-corpus-26-train	كم تتقاضى ثمنا لإرسالها لليابان ؟	قديش بدك توخذ عشان تبعثها على اليابان؟
12976	corpus-6-test-corpus-26-dev	ليس لدي أية مضارب أو أحذية .	ما عندي لا مظارب ولا أحذية.
13015	corpus-6-test-corpus-26-train	هل تقبل بالين الياباني ؟	بتوخذ بالين ياباني؟
13022	corpus-6-test-corpus-26-train	هل لديك سيارة من طراز ستانج ؟	عندك سيارة من نوع ستانج؟
13027	corpus-6-test-corpus-26-train	هل سنقفز من هنا ؟	رح إنط من هون؟
13069	corpus-6-test-corpus-26-train	يا سيد كاواي لدينا مائدة لك الآن . تفضل من هنا .	يا أستاذ كاواي، عنا طاولة الك حاليا. تعال من هون.
13072	corpus-6-test-corpus-26-train	بالتأكيد ، انزل من على الدرج هناك وسوف تجد بعض الإرشادات فاتبعها من فضلك .	أكيد، إنزل من الدرج هناك وراح تلاقي تعليمات، اتبعهن لو سمحت.
13075	corpus-6-test-corpus-26-dev	المكتب الأمامي . هل يمكنني أن أساعدك ؟	أول مكتب من قدام . شلون بقدر أخدمك؟
13076	corpus-6-test-corpus-26-train	هلا أنزلتني عند فندق هلتون من فضلك ؟	ممكن تنزلني عند فندق الهيلتون لو سمحت؟
13077	corpus-6-test-corpus-26-dev	هل يتحتم عليك كثيراً أن تعمل حتى ساعة متأخرة ؟	بتظطر كثير تشتغل لوقت متأخر؟
13090	corpus-6-test-corpus-26-dev	آسف جداً , ليس لدينا المزيد . ماذا عن الصحف الإنجليزية ؟	آسف كثير, ما عنا زيادة. شو رايك بالجرايد الإنجليزية؟
13095	corpus-6-test-corpus-26-train	مائة غير المدخنين من فضلك .	مية غير اللي بدخنوا، لو سمحت.
13096	corpus-6-test-corpus-26-train	هلا أخبرتني قبل أن نصل إلى درهام ؟	بصير تخبرني قبل ما نوصل لـ درهام؟
13113	corpus-6-test-corpus-26-test	هل هو طازج إلى هذا الحد ؟	هو طازا لهالدرجة
13116	corpus-6-test-corpus-26-train	ليس هذا صحيحاً . أنت دائما تعاملني .	هاظ مش صحيح . إنت دايما بتعاملني.
13118	corpus-6-test-corpus-26-dev	هلا أريتني بعض الفساتين ؟	ممكن توريني شوي من الفساطين؟
13126	corpus-6-test-corpus-26-train	تهجى الكلمة من فضلك ؟	هجي الكلمة لو سمحت؟
13133	corpus-6-test-corpus-26-train	بدأت الخمر تثملني .	بلش العرق يسكرني.
13134	corpus-6-test-corpus-26-train	احترس لأن الجو في الجبال شديد التقلب .	انتبه لأنه جو الجبال بيتغير بسرعة.
13159	corpus-6-test-corpus-26-train	هل يمكن استخدام شيكات سياحية وعملة ين ياباني ؟	بصير تستعمل شيكات سياحية وعملة ين ياباني؟
13162	corpus-6-test-corpus-26-train	آسف ، لقد تحققت من إدارة الخدمة وإدارة المفقودات ولم أجدها عندهم .	بعتذر، تأكدت من إدارة الخدمة وإدارة المقودات وما لقيتها عندهم.
13172	corpus-6-test-corpus-26-train	يصعب العثور على هذا المكان . إنه في طريق ضيق يتفرع من الطريق الرئيسي .	صعب يلتقى هالمكان. هو بدخلة بتتفرع من الشارع الرئيسي.
13183	corpus-6-test-corpus-26-train	لا أعرف شيئاً عن هذا الأمر .	ما بعرف إشي عن هالشغلة.
13184	corpus-6-test-corpus-26-train	يمكن أن نتحدث حول هذا الموضوع في مقهى .	ممكن نحكي عن هالموضوع بالكافيه.
13188	corpus-6-test-corpus-26-train	فهمت ، في هذه الحالة ليس علىّ أن أدفع أجر التبديلات ، أليس كذلك ؟	فهمت، بهاي الحالة ما عليي أدفع فلوس التبديلات، مش هيك؟
13202	corpus-6-test-corpus-26-train	اعطني عامل التليفون من فضلك .	إعطيني عامل التلفون لو سمحت .
13262	corpus-6-test-corpus-26-train	هل يمكن أن تنزل السرج ، من فضلك ؟	ممكن تنزل السرج، لو سمحت؟
13264	corpus-6-test-corpus-26-dev	هل يمكن أن أبيت عندكم الليلة ؟	بقدر أبات عندكو الليلة؟
13267	corpus-6-test-corpus-26-train	حسناً . سوف أخذ اثنين فقط . شكراً .	ماشي، رح أوخذ بس ثنين. شكراً.
13268	corpus-6-test-corpus-26-train	هاهي فاتورتك . الحساب ثلاثة تسعة وسبعين دولار .	هاي فاتورتك. الحساب ثلاثة تسعة وسبعين دولر.
13269	corpus-6-test-corpus-26-train	أنت محظوظ .	إنت محظوظ.
13287	corpus-6-test-corpus-26-train	من فضلك اختر لي مائدة ذات منظر ليلي لطيف .	من فظلك إختارلي طاولة مع منظر حلو بالليل.
13290	corpus-6-test-corpus-26-train	هل هذا مصنوع آليا أم يدويا ؟	هاذ صناعة آلية ولا يدوية؟
13291	corpus-6-test-corpus-26-train	أود تأجير هذا الطراز من السيارات لمدة أربعة وعشرين ساعة .	بدي أستأجر هاذ الموديل من السيارات لمدة أربع وعشرين ساعة.
13306	corpus-6-test-corpus-26-train	كم كان لطيفاً أن التقي بك .	كثير كان حلو إني اجتمع فيك.
13322	corpus-6-test-corpus-26-train	إنه ممزق .	هو إمزع.
13333	corpus-6-test-corpus-26-dev	حسناً ، فلنق نظرة عليك .	طيب ، خلينا نطل عليك .
13347	corpus-6-test-corpus-26-train	حسنا ، تصور كيف ستطول فترة عمله لو سأل سؤالاً آخر لكل شخص . هيا بنا ، لنسرع ونحضر حقائبنا . علينا الذهاب إلى الجمارك للإعلان عن أغراضنا بعد ذلك .	طيب، تخيل كم رح يطول وقت شغله لو سأل كل واحد سؤال ثاني. يلا نروح، خلينا نسرع ونجيب شناتينا. لازم نروح على الجمارك عشان نعلن عن اغراضنا بعد هيك.
13396	corpus-6-test-corpus-26-train	ما هو الوزن ؟	شو الوزن؟
13399	corpus-6-test-corpus-26-train	هل يوجد بالقرب من هنا مطعم صيني ؟	في مطعم صيني قريب من هون؟
13407	corpus-6-test-corpus-26-train	إن الرصيف رقم خمسة يقع هناك .	الرصيف رقم خمسة موجود هناك.
13408	corpus-6-test-corpus-26-train	متى تقام مباراة كرة القدم ؟	متى بتبلش مباراة كرة القدم؟
13423	corpus-6-test-corpus-26-dev	إنها معطلة . هل تستطع فحص آلة التصوير هذه ؟	هاي معطلة. بتقدر تشيّك على آلة التصوير هاي؟
13424	corpus-6-test-corpus-26-test	قهوة مع القشدة والسكر ، من فضلك .	قهوة مع القشطة والسكر، لو سمحت.
13436	corpus-6-test-corpus-26-train	أعتقد أن هناك أخطاءً في الفاتورة .	بظن انه في أغلاط بالفاتورة.
13438	corpus-6-test-corpus-26-train	من فضلك اعطني هذه .	لو سمحت اعطيني هاي.
13440	corpus-6-test-corpus-26-train	إنها البوابة السابعة .	هاي البوابة السابعة.
13444	corpus-6-test-corpus-26-train	هل أنت اسكتلندي ؟	إنت سكتلندي ؟
13446	corpus-6-test-corpus-26-train	ثلاثة اثنان واحد اثنان . انتظر ثانية ، حسنا ؟ أريد أن أرسل لك شيئاً هنا . معذرة .	ثلاثه اثنين واحد اثنين. استناني شوي , طيب؟ بدي أبعثلك اشي هون. اعذرني.
13471	corpus-6-test-corpus-26-test	مائة وخمسة وثلاثون ين للدولار الواحد .	مية وخمسة وثلثين ين للدولار الواحد.
13476	corpus-6-test-corpus-26-train	إن الجونلات القصيرة ومعها الأحذية الطويلة لن تنقضي موضتها .	مش ممكن تخلص موضة التنانير القصيرة مع الجزم الطويلة.
13477	corpus-6-test-corpus-26-train	هل أستطيع التحدث مع المدير ؟	بقدر أحكي مع المدير؟
13480	corpus-6-test-corpus-26-train	لماذا يختلف السعر عن الموجود في العداد ؟	ليش السعر غير عن اللي عالعداد؟
13484	corpus-6-test-corpus-26-train	هل يمكن أن أرى هذا ؟	ممكن أشوف هاظا؟
13487	corpus-6-test-corpus-26-train	لعد تعهدت لنفسي بأنني سوف أتعرف عليك عندما أراك .	وعدت حالي انه رح أعرفك لما بشوفك.
13488	corpus-6-test-corpus-26-train	ما الذي كان يحدث منذ الفترة الأخيرة ؟	شو اللي كان صاير من زمان؟
13492	corpus-6-test-corpus-26-train	لا أشعر بحالة جيدة . هل ترشدني إلى طبيب ؟	ما بحس حالي ملبح. ممكن ادلني على دكتور؟
13504	corpus-6-test-corpus-26-train	حفلتك مقامة الآن . تفضل .	حفلتك مبلشة هسا. تفظل.
13515	corpus-6-test-corpus-26-train	هل هناك عرض ترفيهي ليلي ؟	في عرض ترفيهي بالليل؟
13528	corpus-6-test-corpus-26-dev	سيفون الحمام لا يعمل .	سيفون الحمام مش شغال.
13532	corpus-6-test-corpus-26-dev	كم من الوقت نحتاج للذهاب مشياً من هنا إلى مبنى البلدية ؟	قديش بدنا وقت عشان نمشي من هون لبناية البلدية؟
13547	corpus-6-test-corpus-26-train	خذ هذا الدواء بعد كل وجبة عندما يزداد الألم .	أخذ هاظا الدوا بعد كل وجبة لما يزيد الوجع.
13550	corpus-6-test-corpus-26-train	لقد وضعت المال في مظروف خاص مزين يسمى شوجيبوكورو .	حطيت المصاري بظرف خاص مزركش اسمه شوجيبوكورو.
13553	corpus-6-test-corpus-26-train	لقد أصيب شخص .	انصاب عنا واحد.
13609	corpus-6-test-corpus-26-test	أتساءل عما يمكنني أن أحصل عليه منه ؟	بفكر شو بقدر استلم منو؟
13624	corpus-6-test-corpus-26-train	هل لديك خريطة لمترو الأنفاق ؟	عندك خريطة للمترو؟
13629	corpus-6-test-corpus-26-train	لدي غرفة جاهزة لك في جراند هويتل . هل تستطيع الذهاب إلى هناك ؟	عندي غرفة جاهزة إلك بالجراند هوتيل. بتقدر تروح لهناك؟
13635	corpus-6-test-corpus-26-train	عندي ألم في عيني اليمنى .	عندي وجع بعيني اليمين.
13657	corpus-6-test-corpus-26-train	لا أحسن الألمانية كثيراً .	ما بعرف ألماني كثير.
13660	corpus-6-test-corpus-26-train	لابد أن نجتمع ثانية بالتأكيد .	لازم نجتمع مرة ثانية أكيد.
13666	corpus-6-test-corpus-26-train	هلا أخذت هذه السراويل ؟	ممكن توخذ هاي البنطلونات؟
13682	corpus-6-test-corpus-26-train	هل يمكنني استعارة مضرب وكرات ؟	ممكن أستعير مضرب وطابات؟
13685	corpus-6-test-corpus-26-test	هل يمكن أن تدخل معه فكة صغيرة ؟	بتقدر ادخل معه شوية فراطة؟
13694	corpus-6-test-corpus-26-train	هل يمكن أن أخذ نصف إبريق ؟	ممكن أوخذ نص بريق؟
13707	corpus-6-test-corpus-26-train	تحية . أنا جون .	مرحبا. أني جون.
13717	corpus-6-test-corpus-26-train	ناكاي .	ناكاي .
13719	corpus-6-test-corpus-26-train	هل تمانع إذا التقطت صورة لك ولسيارتك الأجرة ؟	بتمانع لو أخذت صورة إلك وللتكسي تبعتك؟
13733	corpus-6-test-corpus-26-train	لقد اتصلت منذ ثلاثة أيام بخصوص حقيبة ضائعة .	اتصلت من ثلاث أيام عشان شنتة ظايعة.
13748	corpus-6-test-corpus-26-test	أريد فندقاً ارخص .	بدي فندق أرخص.
13755	corpus-6-test-corpus-26-dev	أوه ، هناك الكثير مما يجب أن تراه في قرية جرينتش .	اووه، فيه شغلات كثير لازم تشوفها في قرية جرينتش.
13769	corpus-6-test-corpus-26-train	في عمل . لدي صلات عمل هناك .	في شغل. عندي واسطات شغل هناك.
13783	corpus-6-test-corpus-26-train	إنه يلائم بزتك .	بناسب سترتك .
13784	corpus-6-test-corpus-26-train	هلا راقبت حقيبتي من فضلك ؟	ممكن تراقبلي شنتي ، لو سمحت؟
13788	corpus-6-test-corpus-26-train	كيف تحب هذه الفكرة ؟ نحن نقبل بشرطك الذي ينص على فترة بلاغ مسبق قدرها ستة اشهر شريطة أن تمنحنا الحق بالبيع لمدة ستة أشهر بعد إنهاء العقد .	شو رأيك بهالفكرة؟ احنا قبلنا بشرطك اللي كاتب فيه عن فترة انذار مسبقة قد ما تكون ستة أشهر، بس بس يكون عنا الحق نبيع لمدة ستة أشهر بعد ما نخلص العقد.
13803	corpus-6-test-corpus-26-train	معذرة . هل تعرف نيويورك جيدا ؟	معلش . بتعرف نيويورك مليح ؟
13824	corpus-6-test-corpus-26-test	سوف ننتظر . من فضلك اتصل بنا عندما تكون مستعداً .	رح نستنى . لو سمحت, إتصل فينا لما تكون جاهز.
13827	corpus-6-test-corpus-26-train	أود زيارة جراح .	بدي اروح عند دكتور جراحة.
13828	corpus-6-test-corpus-26-dev	هل هذه مكونات طبيعية ؟	هاي مكونات طبيعية؟
13831	corpus-6-test-corpus-26-train	أريد أن أركب في سيارة رياضية .	بدي أطلع بسيارة سبايدر.
13843	corpus-6-test-corpus-26-train	كود المنطقة هو صفر ثلاثة . والرقم هو ثلاثة واحد اثنان ثلاثة أربعة خمسة ستة سبعة .	رمز المنطقة هو صفر تلاتة. والرقم هو تلاتة واحد اتنين تلاتة أربعة خمسة ستة سبعة.
13854	corpus-6-test-corpus-26-train	لقد أصيب ببرد .	صار عنده رشح.
13856	corpus-6-test-corpus-26-test	أفضل شيء هو اسطوانة مصغرة .	أحسن اشي هو سي دي صغير.
13862	corpus-6-test-corpus-26-train	أريد أن أرسل ذلك بطريقة التوصيل العام .	بدي أبعث هاي عن طريق التوصيل العام.
13903	corpus-6-test-corpus-26-train	دعني أحول هذه المكالمة إلى المسئول .	خليني أحوّل هاي المكالمة للمسؤول.
13913	corpus-6-test-corpus-26-train	أي مقاس تريد ؟	شو السايز اللي بدك ياه؟
13919	corpus-6-test-corpus-26-train	أوه يا عزيزي . لم أدرك أنني لازلت لدي هذه الأشياء .	يا حبيبي، ما كنت أدري إنه بعده عندي هاي الأشياء.
13920	corpus-6-test-corpus-26-train	هل ليدكم صناديق لإرسال الطرود ؟	عندكم علب لارسال الطرود ؟
13921	corpus-6-test-corpus-26-train	هل ستدفع شركة الطيران رسوم الفندق والوجبات ؟	رح تدفع شركة الطيران رسوم الفندق والوجبات؟
13938	corpus-6-test-corpus-26-train	هل هذه كلها هي حقائبك ؟	هاي كلها شناتيك؟
13942	corpus-6-test-corpus-26-train	كيف ترغب في إجراء المكالمة ؟	شلون بدك تعمل المكالمة؟
13946	corpus-6-test-corpus-26-train	حسنا ، إنه باهظ الثمن . إنه لم يصنع في اليابان ، أليس كذلك ؟	تمام ، هو غالي .اكيد مش صنع اليابان، مش؟
13953	corpus-6-test-corpus-26-train	هلا مررت لي الملح ، من فضلك ؟	ممكن تقربلي الملح، لو سمحت؟
13966	corpus-6-test-corpus-26-train	أين أقرب مطعم لهذا الفندق ؟	وين أقرب مطعم لهالفندق؟
13993	corpus-6-test-corpus-26-train	أريد شامبو للشعر العادي .	بدي شامبو للشعر العادي.
14008	corpus-6-test-corpus-26-train	متى تعتقد سيتم إيجادها ؟	متى بتظن رح يلاقوها؟
14014	corpus-6-test-corpus-26-train	أتمنى لك عاما سعيدا جدا .	بتمنالك سنة سعيدة كثير.
14018	corpus-6-test-corpus-26-train	سوف أتناول زجاجة سبرايت كبيرة .	رح أشرب قنينة سبرايت كبيرة.
14043	corpus-6-test-corpus-26-test	من فضلك كررها مرة أخرى ببطء أكثر .	من فضلك عيدها مرة ثانية أبطء شوي.
14045	corpus-6-test-corpus-26-train	معذرة . أريد أن أطلب طلب .	معلش . بدي أطلب طلب .
14059	corpus-6-test-corpus-26-test	عندنا جمبري بصلصة النيوبرج ورجل حمل مشوية .	عنا شريمب بصلصة النيوبرغ موزة خروف مشوية.
14069	corpus-6-test-corpus-26-train	أريد غرفة بمنظر جميل .	بدي غرفة مع إطلالة حلوة.
14074	corpus-6-test-corpus-26-train	ثلاثة أقداح من عصير الشمام ، من فضلك .	ثلاث كاسات من عصير الشمام، لو سمحت.
14086	corpus-6-test-corpus-26-train	عندي ثلاثة أطفال .	عندي ثلاث ولاد.
14088	corpus-6-test-corpus-26-train	سر للأمام إلى آخر هذه القاعة وانعطف يسارا عند الركن . سوف تجدها على يمينك .	إمشي لقدام لاخر هالصالة ولف شمال عند الركن. بتلاقيها على يمينك.
14089	corpus-6-test-corpus-26-dev	هل هي جولة يوم كامل ؟	هي الرحلة ليوم كامل؟
14094	corpus-6-test-corpus-26-train	كم تبلغ تكلفة تذكرة ذهاب وعودة إلى أوكسفورد ؟	قدايش بتكلف تذكرة روحة رجعة لأوكسفورد؟
14098	corpus-6-test-corpus-26-train	اذهب إلى نادي رياضي كل يومين .	روح عالجيم كل يومين.
14099	corpus-6-test-corpus-26-train	أين يمكنني أن أقيم أثناء الجولة ؟	وين ممكن أسكن خلال الرحلة؟
14104	corpus-6-test-corpus-26-train	ما توقيت إجراءات مغادرة الفندق ؟	متى منقدر نعمل الاجراءات حتى نطلع من الفندق؟
14108	corpus-6-test-corpus-26-train	كم يتقاضى المرشد في اليوم ؟	قديش بيوخذ الدليل باليوم؟
14120	corpus-6-test-corpus-26-train	أين أجد الاسطوانات المدمجة ؟	وين بلاقي السيديات؟
14147	corpus-6-test-corpus-26-train	معذرة . أنا طالب جامعي من اليابان . هل أنتم طلاب في جامعة نيويورك ؟	معلش، أنا طالب جامعي من اليابان. إنتوا طلاب بجامعة نيو يورك؟
14150	corpus-6-test-corpus-26-train	هل من الممكن أن تخبرنا كيف تقيم هذه الخطة ؟	ممكن تحكيلنا كيف بتعمل هاي الخطة ؟
14167	corpus-6-test-corpus-26-train	أكي ، هل تعرف محل تسجيلات قريب من هنا ؟	أكي، بتعرف محل تسجيلات قريب من هون؟
14168	corpus-6-test-corpus-26-train	نقدا أم ببطاقة الائتمان ؟	كاش ولا بالفيزا؟
14174	corpus-6-test-corpus-26-train	أعمل في شركة تجارية .	أني بشتغل بشركة تجارية.
14175	corpus-6-test-corpus-26-train	ليس من الأدب أن تسأل الناس كم يتقاضون .	مش من الأدب تسأل الناس قديش بوخذوا .
14184	corpus-6-test-corpus-26-train	هل هذه من نوع ليفي خمسة صفر المعتمدة ؟	هاي من نوع ليفي خمسة صفر الأصلية؟
14195	corpus-6-test-corpus-26-train	متى يمكنني أن آخذ حماما ؟	متى بقدر أوخذ دش؟
14198	corpus-6-test-corpus-26-train	لا تبدوا أكثر من إحدى وعشرون سنة من العمر .	ما بتبين أكثر من واحد وعشرين سنة عمرها.
14219	corpus-6-test-corpus-26-train	أفهم . في الواقع إنه به فيلم عالي السرعة . هل تمانع إذا أخرجته ؟	فهمت. فعلاً هو فيه فلم سرعته عالية. بتمانع لو طلعته؟
14224	corpus-6-test-corpus-26-train	اشتراها الآن فقط .	شتراها هسه بس.
14232	corpus-6-test-corpus-26-train	سوف أحضر واحدة في الحال .	راح أجيب وحدة مباشرة.
14235	corpus-6-test-corpus-26-train	ثمانية دولارات . وهنا تأتي واحدة حالا .	ثمن دولرات. وهون بتيجي وحدة هسا.
14242	corpus-6-test-corpus-26-train	من فضلك أظهرها مع المشتريات في الجمارك في المطار .	لو سمحت، طلعها مع الاغراض اللي اشتريتهن بالجمارك بالمطار.
14261	corpus-6-test-corpus-26-train	هل أي من المتاجر الكبيرة به يعمل الآن ؟	في أي مول فاتحة هسه؟
14265	corpus-6-test-corpus-26-train	يا عامل الاتصال ، وصلني بمحطة الإطفاء .	يا اللي بتشتغل بالاتصالات، اشبكني مع الدفاع المدني.
14266	corpus-6-test-corpus-26-train	لقد حصلت على بطارية فارغة .	بطاريتي صارت فاضية.
14289	corpus-6-test-corpus-26-train	توقف عند التقاطع القادم .	وقّف عند التقاطع الجاي.
14292	corpus-6-test-corpus-26-train	آه ، ها هي . هل ينبغي على كل شخص أن يملأ استمارة الإقرار الجمركي هذه ؟	آه، هيها . كل واحد لازم يعبي هاي الاستمارة للجمرك؟
14304	corpus-6-test-corpus-26-train	ممكن أعرف اسمك من فضلك ؟	ممكن أعرف اسمك لو سمحت؟
14306	corpus-6-test-corpus-26-train	هل من الممكن إجراء اتصال على أن يتم تحصيل أجرته من الطرف الآخر ؟	ممكن أعمل مكالمة وتوخذوا حقها من الطرف الثاني؟
14311	corpus-6-test-corpus-26-train	مرحبا . كيف حالك ؟	مرحبا . كيف حالك؟
14317	corpus-6-test-corpus-26-train	أين قسم السفر ؟	وين قسم السفر؟
14336	corpus-6-test-corpus-26-train	ما اسم الشخص الذي تود التحدث إليه ؟	شو اسم الشخص اللي بدك تحكي معه؟
14347	corpus-6-test-corpus-26-test	أنا آسف ، هو ليس بالداخل الآن .	أني آسف، هو مش جوا هسا.
14363	corpus-6-test-corpus-26-train	أنظر إلى هذا . انظر إلى هذا . سوف تخبرني أن الاختلاف بين هذا الشاب وذلك الشاب هو الحظ ؟ محمد ، يقف بالسيارة في جانب الطريق ، وأنت ؟ لن تمانع في أن أنام معك هنا . أنا متأخر . كان لقاء جميل معك ؟	شوف هاظ. شوف هاظ. راح تحكيلي انو الفرق بين هالشب وهذاك الشب هو الحظ؟ محمد، واقف بالسيارة على زقاق الشارع، وإنت؟ ما راح تعترض اذا قعدت معك هون. انا تأخرت. كان لقاء حلو معك؟
14373	corpus-6-test-corpus-26-dev	هل غرفتك تطل على المدينة ؟	بتطل غرفتك على البلد؟
14389	corpus-6-test-corpus-26-train	أية رسائل لي ؟	في أي رسايل إلي؟
14400	corpus-6-test-corpus-26-test	لا زالت غالية جدا . هل من الممكن أن آخذها بثلاثة دولارات ؟	بعدها غالية كثير. ممكن أشتريها بـثلث دولارات؟
14402	corpus-6-test-corpus-26-train	نريد غرفة في الخلف .	بدنا غرفة من ورا.
14403	corpus-6-test-corpus-26-dev	سوف أتناول كأسا من النبيذ .	راح أشرب كاس من الواين.
14416	corpus-6-test-corpus-26-train	تبدو جميلا .	بتبين حلو.
14426	corpus-6-test-corpus-26-test	أريد غرفة بسريرين . ما ثمن الغرفة في الليلة ؟	بدي غرفة بتختين. قديش تكلفة الغرفة بالليل؟
14434	corpus-6-test-corpus-26-train	إنها تبعد حوالي تسعة وتسعون ميلا .	هي بتبعد حوالي تسعة وتسعين ميل.
14441	corpus-6-test-corpus-26-train	فينس وليندا يريدان أن يبقيا بمفرديهما ، لذا أخشى أنني لا بد أن أبقى هنا هذه الليلة .	فينس وليندا بدهم يظلوا لحالهم، فبخاف انو لازم اظل هون الليلة.
14444	corpus-6-test-corpus-26-train	من فضلك احفظ هذه الحقائب في محتجز الجمارك .	لو سمحت خلي هالشنتات بالجمارك.
14448	corpus-6-test-corpus-26-train	اسمي ساتو .	إسمي ساتو .
14457	corpus-6-test-corpus-26-train	أعرف نادي قديم لموسيقى الجاز بوسط البلد .	بعرف نادي قديم لموسيقى الجاز بوسط البلد.
14459	corpus-6-test-corpus-26-train	سأتناول هذه الوجبة .	رح أوكل هاي الأكلة.
14462	corpus-6-test-corpus-26-dev	أود أن أتتناول طبقا مثل هذا .	بدي أوكل صحن زي هاظ.
14475	corpus-6-test-corpus-26-train	حينئذ سنأخذها .	بهالوقت رح نوخذها.
14477	corpus-6-test-corpus-26-train	هل يصعد هذا إلى الدور السادس ؟	هاذ بطلع للطابق السادس؟
14478	corpus-6-test-corpus-26-dev	جلد التمساح الأمريكي .	جلد التمساح الأمريكي.
14483	corpus-6-test-corpus-26-train	من فضلك ضعه في كيس الغسيل و اتركه هناك .	لو سمحت، حطه بكيس الغسيل و خليه هنيك.
14484	corpus-6-test-corpus-26-train	أود تحميض هذا الفيلم . متي سيكون جاهزا ؟	بدي أحمض هالفلم. متى رح يكون جاهز؟
14495	corpus-6-test-corpus-26-dev	من فضلك لا تعطي هذا المفتاح لأي شخص آخر غيري .	إذا بتسمح ما تنطي هاذ المفتاح لحدا غيري.
14500	corpus-6-test-corpus-26-test	و هو كذلك . سأمر عليك و آخذك بالسيارة من الفندق الذي تقيم فيه في الساعة الثامنة .	و هو هيك . رح أمر عليك و اخذك بالسيارة من الفندق اللي إنت قاعد فيه عالساعة ثمنية.
14502	corpus-6-test-corpus-26-train	النافذة جيدة	الشباك كويس
14505	corpus-6-test-corpus-26-train	اجعل قصة الشعر تتدلى لأسفل , من فضلك .	خلي قصة الشعر تنزل لتحت، لو سمحت.
14507	corpus-6-test-corpus-26-train	هل تم إدراج جميع تكاليف النقل ؟	كل تكاليف الشحن انحسبت ؟
14509	corpus-6-test-corpus-26-train	أوبرا ميتروبوليتان .	أوبرا المتروبوليتان.
14514	corpus-6-test-corpus-26-train	أين مكان تأجير السيارات ؟	وين مكان تأجير السيارات؟
14519	corpus-6-test-corpus-26-dev	اشعر بأنني ملئ بالحيوية منذ الليلة الماضية .	حاس إني مليان طاقة من امبارح الليل.
14520	corpus-6-test-corpus-26-train	هذا لا يناسب ذوقي .	هاذ مش عزوقي.
14530	corpus-6-test-corpus-26-train	ما أنواع الخضراوات الموجودة لديك ؟	شو هي الخضرة اللي عندك؟
14531	corpus-6-test-corpus-26-test	أريد عمل تمويجا لشعري ليكون طليقا .	بدي أعمل كيرلي لشعري عشان اخليه مفرود.
14534	corpus-6-test-corpus-26-train	متي سيأتي الطبيب ؟	متى رح يجي الدكتور؟
14537	corpus-6-test-corpus-26-train	انه اللون الخاطئ .	هاظا اللون غلط.
14538	corpus-6-test-corpus-26-train	لقد انكسرت السنة .	انكسرت السنة.
14542	corpus-6-test-corpus-26-train	هل هذا المقعد بجوار الممر أم بجوار النافذة ؟	هاذ الكرسي جنب الممر ولا جنب الشباك؟
14557	corpus-6-test-corpus-26-train	أنا في نزهة طويلة سيرا على الأقدام .	أني طالعة برحلة طويلة تمشاية عجري.
14564	corpus-6-test-corpus-26-dev	هل يمكنك أن توصل أمتعتي إلى الغرفة ؟	ممكن توصل اغراضي للغرفة؟
14573	corpus-6-test-corpus-26-train	أرني واحدة لإحدى الشابات .	وريني وحدة لوحدة من الصبايا.
14590	corpus-6-test-corpus-26-train	هل يمكنك أن تتحرك بهذا الاتجاه ؟	بتقدر تمشي بهالجهة؟
14593	corpus-6-test-corpus-26-dev	هل لديك أي شيء يبلغ سعره ثمانون دولارا فقط ؟	عندك اشي بسعر ثمانين دولر بس؟
14605	corpus-6-test-corpus-26-train	أنا ظمآن .	أني عطشان.
14612	corpus-6-test-corpus-26-train	بدون حليب , من فضلك .	بدون حليب, لو سمحت.
14683	corpus-6-test-corpus-26-dev	لدي ثلاث حقائب .	عندي ثلث شناتي.
14685	corpus-6-test-corpus-26-train	أين البحيرة ؟	وين البحيرة؟
14693	corpus-6-test-corpus-26-test	معذرة , قم بالضغط على مصراعي النافذة الخشبيين , من فضلك .	عفواً، نزل اباجور الشباك الخشب , لو سمحت.
14709	corpus-6-test-corpus-26-train	هل يمكن أن احصل على احدى المجلات أو شيئ من هذا القبيل ؟	ممكن أوخذ وحدة من المجلات أو شي زي هيك؟
14718	corpus-6-test-corpus-26-train	انها باتجاه الجنوب .	هي باتجاه الجنوب.
14721	corpus-6-test-corpus-26-train	ما تكلفة المقاعد الخاصة بالشرفة ؟	قديش بتكلف الكراسي تبعت البرندة؟
14734	corpus-6-test-corpus-26-test	نرغب في حجرة تطل على البحيرة .	حابين غرفة بتطل على البحيرة.
14737	corpus-6-test-corpus-26-train	هل هناك أي صناديق بريد قريبة من هنا ؟	فيه صناديق بريد قريبة من هون؟
14757	corpus-6-test-corpus-26-train	و هو كذلك . سأوصلك إلى هناك .	و هو هيك . رح اوصلك لهناك.
14761	corpus-6-test-corpus-26-train	الجزء المكتوب بالطريقة المائلة يشير إلى التغييرات التي حدثت في التسعينات .	الجزء اللي مكتوب بالطريقة المايلة بدل على التغييرات اللي صارت بالتسعينات.
14763	corpus-6-test-corpus-26-train	أنه يبلغ من العمر ثلاثون عاما .	هو عمره ثلاثين سنة.
14777	corpus-6-test-corpus-26-test	وهو كذلك . هل يمكنك كتابة العنوان مرة أخرى علي هذا الظرف ؟	و هو هيك. بتقدر تكتب العنوان مرة ثانية على هالظرف؟
14783	corpus-6-test-corpus-26-train	أود الذهاب إلى محل الهارودز . هل معك خريطة , من فضلك ؟	بدي اروح على محل الهارودز. معك خريطة, لو سمحت؟
14786	corpus-6-test-corpus-26-train	ما ذا تفعل في وقت فراغك ؟	شو بتعمل بوقت فراغك؟
14789	corpus-6-test-corpus-26-train	هل لديك أحجار بطارية لهذه الكاميرا ؟	عندك بطاريات لهاي الكميرا؟
14805	corpus-6-test-corpus-26-train	أود إرسال برقية لاسلكية .	بدي أبعث رسالة لاسلكية.
14807	corpus-6-test-corpus-26-train	هل أنت الأخير في هذا الصف ؟	إنت الأخير بهاذ الصف؟
14810	corpus-6-test-corpus-26-train	أعتقد أن الحجز قد زاد عن العدد .	بظن إنو الحجز طلع زاد عن العدد.
14813	corpus-6-test-corpus-26-train	ركلة موفقة . كادت تدرك الهدف .	تسديدة موفقة. راحت ما تيجي جول.
14818	corpus-6-test-corpus-26-train	هل يمكن أن تخبرني عن الأماكن الشيقة هنا ؟	ممكن تحكيلي عن الأماكن الحلوة هون؟
14820	corpus-6-test-corpus-26-train	هل يوجد أي محل متعدد الأقسام قريب من هنا ؟	في أي مول قريب من هون؟
14854	corpus-6-test-corpus-26-dev	و أنا كذلك .	وأني هيك .
14862	corpus-6-test-corpus-26-train	أود اللحاق بالسفر من سان دييجو .	بدي ألحق أسافر من سان دييجو.
14863	corpus-6-test-corpus-26-train	كنت أفكر في الحصول على هذه الدورة في فترة نصف العام المقبلة .	كنت بفكر أوخذ هالكورس بفترة نص السنة الجاية.
14887	corpus-6-test-corpus-26-train	النبيذ ليس باردا بشكل كافي . هل نمكنك أن تجعله أكثر برودة ؟	الواين مش بارد كفاية. ممكن تبرده اكثر؟
14901	corpus-6-test-corpus-26-dev	هل يمكنك أن تغيير لي هذا القرط إلى أخرى يمكن أن تشبك .	بتقدر تغيرلي هالقرط لوحدة تانية يمكن تنشبك.
14903	corpus-6-test-corpus-26-train	ما هي أكثر الأشياء التي تثير اهتمامك الآن ؟	شو أكثر الأشياء اللي بتلفت انتباهك هسا ؟
14905	corpus-6-test-corpus-26-train	أريد إعادة المال . هل يمكن أن أحصل على مالي ؟	بدي أرجع المصاري. بقدر أوخذ مصرياتي؟
14926	corpus-6-test-corpus-26-train	ربما لا يمكنني أن أتناول مثل هذا المشروب في أي مكان آخر .	يمكن ما بقدر أشرب هيك مشروب بأي مكان ثاني.
14933	corpus-6-test-corpus-26-train	إذا اشتريت هذا أيضا , فستعمل للمبلغ الذي يعفي من الرسوم .	لو اشتريت هاظ كمان, رح توصل للمبلغ اللي بيعفي من الرسوم.
14952	corpus-6-test-corpus-26-train	هل يمكنني أن أطلع على شهادة التطعيم الخاصة بك , من فضلك ؟	بقدر أشوف شهادة التطعيم تاعيتك، إذا سمحت؟
14960	corpus-6-test-corpus-26-train	هل تسافر كثيرا ؟	بتسافر كثير؟
14969	corpus-6-test-corpus-26-train	أنا من الولايات المتحدة .	أني من أمريكا.
14976	corpus-6-test-corpus-26-train	معي تذكرة طيران إلى سان فرانسيسكو .	معي تذكرة طيران لـسان فرانسيسكو.
14998	corpus-6-test-corpus-26-train	لو إن المسافة خمسة عشرة دقيقة فقط من المحطة ، إذن سأمشيها .	لو المسافة خمسطعشر دقيقة بس من المجمع ، بمشيها لعاد.
15019	corpus-6-test-corpus-26-train	أريد فندق أرخص قليلاً .	بدي فندق أرخص شوي.
15020	corpus-6-test-corpus-26-test	تبدو البونساي كهواية شخص هرم .	شكلها البونساي هواية الختيار.
15024	corpus-6-test-corpus-26-dev	لم أقرر بعد . هل لك أن تعطيني وقتاً أكثر ؟	بعدني ما قررت. ممكن تعطيني وقت زيادة؟
15025	corpus-6-test-corpus-26-train	مصاب بالصداع .	عندي صداع.
15036	corpus-6-test-corpus-26-dev	هل تفضلت و احتسيت القهوة معي ؟	تتفضل و تشرب قهوة معي؟
15037	corpus-6-test-corpus-26-train	أريد شهادة طبية وإيصال من أجل التأمين الخاص بي .	بدي شهادة طبية و وصل عشان التأمين تاعي.
15046	corpus-6-test-corpus-26-test	آه ، كلا . من فضلك أسرع . إننا متأخرون .	آه، لأ. لو سمحت عجل، إحنا متأخرين.
15051	corpus-6-test-corpus-26-train	لا أريد إنفاق أكثر من عشرين دولاراً .	ما بدي أصرف أكثر من عشرين دولار.
15062	corpus-6-test-corpus-26-train	لماذا لم تقلع الرحلة ؟ أخبرني عما يجري .	ليش ما طلعت الرحلة؟ قلي شو بصير.
15073	corpus-6-test-corpus-26-test	كم الأجرة ؟ هل لك أن تدون الأجرة على قطعة ورق ؟	قديش الأجرة؟ ممكن تكتبها على شقفة ورقة؟
15083	corpus-6-test-corpus-26-train	أريد استئجار كرسي مركب .	بدي أستأجر كرسي اتمدد عليه.
15087	corpus-6-test-corpus-26-train	انتظر دقيقة من فضلك .	استنى دقيقة لو سمحت.
15088	corpus-6-test-corpus-26-test	هل على السيدات ارتداء فستان سهرة ؟	لازم الستات يلبسن فسطان سهرة؟
15095	corpus-6-test-corpus-26-train	لا تلمسني .	ما تلمسني.
15109	corpus-6-test-corpus-26-train	هل معك سجائر ؟	معك دخان؟
15123	corpus-6-test-corpus-26-train	يمكننا الذهاب إلى نقطة تيكي إذا لم تكن الريح قوية .	ممكن نروح على تيكي اذا ما كان الهوا قوي.
15126	corpus-6-test-corpus-26-train	رائع .	بجنن.
15133	corpus-6-test-corpus-26-train	سأغلق الآن . شكراً على انتباهكم .	رح أسكر هسا. شكراً على انتباهكو.
15145	corpus-6-test-corpus-26-dev	هل لديك ألوان أخرى من هذا ؟	عندك ألوان ثانية من هاذ؟
15149	corpus-6-test-corpus-26-train	من هذا ؟	مين هاظا؟
15157	corpus-6-test-corpus-26-train	معذرة . هل لك أن تدلني على مكان موقف سيارات الأجرة ؟	معلش، بتقدر تدلني على موقف سيارات التكسي؟
15170	corpus-6-test-corpus-26-train	وللشرب ؟ .	بتشرب إشي ؟ .
15181	corpus-6-test-corpus-26-train	هاهي .	هيها .
15201	corpus-6-test-corpus-26-train	أين يوجد أقرب متجر لأجهزة الكمبيوتر ؟	وين أقرب محل لأجهزة الكمبيوتر ؟
15206	corpus-6-test-corpus-26-train	هه . إنها لا تعمل ، أليس كذلك ؟ يمكنك الانتقال إلى مقعد شاغر إذا كنت تريد ذلك .	هه. ما بتشتغل، صح ؟ بتقدر تروح عكرسي فاضي اذا بدك .
15221	corpus-6-test-corpus-26-train	إنني أبحث عن هذا .	أني بدور على هاظ.
15240	corpus-6-test-corpus-26-train	حسناً سيدي . وما الحلو الذي تريد أن تختم به الطعام ؟	طيب يا استاذي.. شو الحلو اللي بدك تختم فيه الأكل ؟
15246	corpus-6-test-corpus-26-train	حافلة عادية أم حافلة مجهزة للنوم ؟	باص عادي ولا باص مجهز للنوم ؟
15247	corpus-6-test-corpus-26-train	شيكات سياحية . شكراً . خذ تذكرتك وبطاقة المرور للصعود على متن الطائرة . كن هناك قبل وقت الرحلة بساعة من فضلك .	شيكات سياحية. شكراً. أخذ تذكرتك و الفيزا عشان تطلع على الطيارة. كون هناك قبل الرحلة بساعة لو سمحت.
15257	corpus-6-test-corpus-26-test	إنه ألم حاد .	هو وجع قوي.
15259	corpus-6-test-corpus-26-train	الاسم هو جورو موتوياما . والرقم هو صفر ثلاثة ثلاثة اثنان ستة واحد اثنان أربعة تسعة خمسة .	الاسم هو جورو موتوياما . والرقم هو صفر ثلاثة ثلاثة اثنان ستة واحد اثنان أربعة تسعة خمسة .
15262	corpus-6-test-corpus-26-train	أشعر بمرض شديد .	بحس حالي مريض كثير.
15274	corpus-6-test-corpus-26-train	ما موعد عرض " قصة حب كوسي " ؟	متى وقت عرض "قصة حب كوسي"؟
15283	corpus-6-test-corpus-26-train	حسناً . هل ستحتسي القهوة الآن أم فيما بعد ؟	ماشي. رح تشرب القهوة هسا ولا بعدين؟
15292	corpus-6-test-corpus-26-train	دلني على أكثر نوادي موسيقى الريجاي إثارة في نيويورك .	دلني على أحلى اندية موسيقى الريجاي في نيويورك.
15295	corpus-6-test-corpus-26-test	ما وجه الاختلاف بين منتجك ومنتج منافسيك ؟	شو الفرق بين منتجك ومنتج الناس اللي بتنافسك؟
15296	corpus-6-test-corpus-26-train	هل من المقبول عدم اتباع أي شخص لتعليمات الأمن ؟	بصير حدا ما يتبع تعليمات الأمن؟
15319	corpus-6-test-corpus-26-train	هل الشوارع الخلفية خطر ؟	الشوارع الخلفية خطرة ؟
15320	corpus-6-test-corpus-26-train	أجل . من فضلك اتخذ الإجراء الضروري .	نعم ، اعمل الإشي الضروري.
15323	corpus-6-test-corpus-26-train	أجل ، واحدة فقط . متى سأعرف ؟ وكيف سيتم تعويضي ؟	أها، بس وحدة؟ متى رح أعرف؟ وكيف رح يكون التعويض؟
15331	corpus-6-test-corpus-26-dev	هاهي بطاقة تحقيق الهوية الخاصة بي .	هاي الهوية تبعتي.
15337	corpus-6-test-corpus-26-train	نفضل مائدة بجوار النافذة .	بنحب طاولة جنب الشباك.
15347	corpus-6-test-corpus-26-train	من فضلك دلني على أرخص وسيلة للذهاب إلى سان فرانسيسكو .	من فضلك دلني على أرخص طريقة حتى أروح على سان فرانسيسكو.
15362	corpus-6-test-corpus-26-train	هل تعرف المطعم يا كيويا ؟	بتعرف المطعم يا كيويا؟
15378	corpus-6-test-corpus-26-train	اتجاه واحد .	اتجاه واحد.
15380	corpus-6-test-corpus-26-train	سأصبح بديناً في حال ما ظللت جالساً هنا آكل باستمرار .	رح أصير ناصح لو استمريت قاعد هون آكل دايما.
15400	corpus-6-test-corpus-26-train	هل يوجد ملهى ليلي جيد به عرض رقصة الفلامنكو ؟	في نايت كلوب رايق عنده رقصة الفلامنكو؟
15419	corpus-6-test-corpus-26-train	جميل الفستان التي ترتدينه .	حلو الفسطان اللي لابسيته.
15431	corpus-6-test-corpus-26-train	قدمي تؤلمني .	إجري بتوجعني.
15436	corpus-6-test-corpus-26-train	أين توجد أقرب مغسلة ؟	وين اقرب مغسلة؟
15443	corpus-6-test-corpus-26-train	هل لك أن نبدل مقاعدنا من فضلك ؟	ممكن نبدل كراسينا لو سمحت؟
15447	corpus-6-test-corpus-26-train	تم الفصل بين مقاعدنا .	صار فصل بين كراسينا.
15452	corpus-6-test-corpus-26-train	في الواقع أريد استصدار صك تأمين على هذا الطرد أيضاً .	بالواقع بدي أطلع ورقة تأمين على هالطرد كمان.
15463	corpus-6-test-corpus-26-train	وصلت الفاتورة لمائة دولار .	وصلت الفاتورة لمية دولار.
15464	corpus-6-test-corpus-26-test	تقع منافذ الخروج للطوارئ في مقدمة ووسط ومؤخرة هذه الطائرة .	الأبواب الطارئة بتكون قدام, وفالنص, وخلف الطيارة هاي.
15470	corpus-6-test-corpus-26-train	حسناً ، تم إعادة التأكيد على حجزك .	ماشي، اتأكدنا من حجزك مرة ثانية.
15476	corpus-6-test-corpus-26-train	الكعب مرتفع جداً .	الكعب عالي كثير.
15477	corpus-6-test-corpus-26-train	نريد مائدة في الشرفة .	بدنا طاولة على البرندة.
15482	corpus-6-test-corpus-26-train	هذا يعني أن الفيلم ربما يكون غير مناسباً للأطفال تحت سن الخامسة عشر . لذلك فإن الآباء بحاجة إلى الأخذ بعين الاعتبار إذا ما كانوا سيدعون الأطفال يشاهدون الفيلم .	هاذ يعني انو الفيلم ممكن يكون مش مناسب للصغار تحت الخمسطعش . اذا الوالدين لازم يوخذوا بعين الاعتبار اذا بدهم يخلو ولادهم يتفرجو عالفيلم .
15487	corpus-6-test-corpus-26-train	كيف تريد النقود ؟ من فضلك املأ هذه الورقة ووقع هنا .	شلون بدك المصاري؟ لو سمحت، عبي هالورقة ووقع هون.
15509	corpus-6-test-corpus-26-train	تؤلمني معدتي أحياناً .	بتوجعني معدتي مرات.
15522	corpus-6-test-corpus-26-train	هل لديكم أطباق ذات سعرات حرارية منخفضة ؟ فأنا أتبع نظاما غذائياً حالياً .	عندكو وجبات قليلة الكالوريز ؟ أنا ماشية بدايت هالأيام.
15529	corpus-6-test-corpus-26-dev	لا يوجد رسم ضروري .	مش موجود رسم ظروري.
15539	corpus-6-test-corpus-26-train	أجل ، معي تذكرتان ل " العمالقة " و " المحتالين " .	أيوة ، معي تذكرتين لـ "العمالقة" و "المحتالين".
15546	corpus-6-test-corpus-26-train	نحن من أكبر موردي أجهزة الميكروكومبيوتر .	إحنا من أكبر موردين لأجهزة الميكرو كمبيوتر .
15553	corpus-6-test-corpus-26-train	شكراً . وأنا أيضاً . إلى اللقاء فيما بعد .	مشكور. وأنا كمان. بشوفك بعدين.
15564	corpus-6-test-corpus-26-train	حجرة مزدوجة بحمام من فضلك .	غرفة مزوجة مع حمام لو سمحت.
15566	corpus-6-test-corpus-26-train	لقد سقطت من على درجات السلم .	وقعت من على درج السلم
15575	corpus-6-test-corpus-26-train	ما هو الآيس كريم الذي تزكيه ؟	شو الأيس كريم اللي بتنصح فيه؟
15577	corpus-6-test-corpus-26-dev	هه . هذه . يبدو اللون جميلاً عليك .	هه. هاي. شكل اللون حلو عليك كثير.
15598	corpus-6-test-corpus-26-test	أين كتب اللغة الأجنبية ؟	وين الكتب الأجنبية؟
15604	corpus-6-test-corpus-26-train	شريحتين وزجاجة سبرايت .	قطعتين وقنينة سبرايت .
15607	corpus-6-test-corpus-26-test	أعطني سجائر .	أعطيني دخان.
15610	corpus-6-test-corpus-26-dev	دخوله البلد مخالف للقانون . آسف . حسناً , إنني أخمن في كيفية العناية بكل شيء .	فوته على البلد مش قانونية. آسف. ماشي، انا بفكر كيف بدي أهتم بكل اشي.
15652	corpus-6-test-corpus-26-train	أجل ، أنا . لقد كانوا يعيشون بجواري في كاليفورنيا لكنهم انتقلوا إلى فلوريدا منذ عامين . ماذا عنك ؟ هل تسافر بمفردك ؟	أيوه، أنا. كانوا عايشين بحدي بكاليفورنيا بس انتقلوا على فلوريدا من سنتين. شو بالنسبة الك؟ بتسافر لحالك؟
15664	corpus-6-test-corpus-26-train	أنا مريض .	أنا مريض.
15666	corpus-6-test-corpus-26-train	يبدو طفلي منهكاً بسبب الحمى .	على ما يبدو ابني تعبان من الحرارة.
15673	corpus-6-test-corpus-26-train	بهذا المقاس من فضلك .	بهالمقاس لو سمحت.
15674	corpus-6-test-corpus-26-train	تمنح أوسمة الاستحقاق الثقافي للفنانين والعلماء المتميزين في هذا اليوم .	بعطوا وسام الاستحقاق الثقافي للفنانين والعلماء المتميزين اليوم.
15676	corpus-6-test-corpus-26-train	أنا ياباني .	أني ياباني.
15692	corpus-6-test-corpus-26-train	هذا ثمنه مرتفع جداً .	هاذ سعره غالي كتير.
15699	corpus-6-test-corpus-26-train	أجل . استقل الحافلة التي تذهب إلى محطة كيوتو .	أها، اركب الباص اللي بيروح على محطة كيوتو.
15710	corpus-6-test-corpus-26-train	هل هذا للأعضاء فقط ؟	هاظا للأعضاء بس ؟
15735	corpus-6-test-corpus-26-dev	سعر الغرفة هو ستة آلاف ين في الليلة .	سعر الغرفة ست آلاف ين لليلة.
15763	corpus-6-test-corpus-26-train	هل يمكنني أن أحضر هذا على متن الطائرة ؟	بقدر أجيب هاذ معي عالطيارة؟
15775	corpus-6-test-corpus-26-train	حسناً . كل ما أريده هو معرفة إذا ما كان المشروع سيحقق ربحاً .	ماشي. كل اللي بدي اياه هو أعرف إذا كان المشروع رح يجيب ربح.
15784	corpus-6-test-corpus-26-train	جميل . هل تريدين إيشارباً يتناسب مع هذا ؟	حلو. بدك شال بلبق مع هاذ؟
15788	corpus-6-test-corpus-26-train	أعد شحن البطارية من فضلك .	عيد شحن البطارية من فضلك .
15791	corpus-6-test-corpus-26-train	أنا مستعد للطلب .	أنا جاهز للطلب.
15798	corpus-6-test-corpus-26-dev	أملاح الحمام العشبي تجعل ملمس بشرتك ناعماً وأملس .	أملاح حمام الأعشاب بتخلي بشرتك ناعمة وملسه .
15804	corpus-6-test-corpus-26-train	اكتب اسم شركة الطيران ورقم الرحلة أيضاً .	اكتب اسم شركة الطيران ورقم الرحلة برضه.
15814	corpus-6-test-corpus-26-train	حقاً . اليوم هو الأحد ، والأحد هو أسوء الأيام .	فعلاً. اليوم الأحد، والأحد أسوأ الأيام.
15896	corpus-6-test-corpus-26-train	أجل . إنها مشكلة تخلص من الفضلات .	أيوة. هاي مشكلة كب الزبالة.
15897	corpus-6-test-corpus-26-train	أريد هذا الطراز لخمسة أماكن مرصعة .	بدي هاي النوعية لخمس أماكن مرصعة.
15899	corpus-6-test-corpus-26-train	لدي معظم العائلات مصدرين للدخل .	أغلب العيل عندهم مصدرين للدخل.
15902	corpus-6-test-corpus-26-train	آه . هذه الفضية نادرة " القمر والجرس " . هل تريد أن تغيرها أكيد ؟	اه . هاي القضية نادرة " القمر والجرس " . بدك تغيرها متأكد ؟
15911	corpus-6-test-corpus-26-train	أمي وأختي قادمتان من اليابان لرؤيتي . سيصلان هنا حوالي السابعة مساءً .	أمي وأختي جايات من اليابان عشان يشوفوني. رح يصلن حوالي الساعة سبعة المسا.
15942	corpus-6-test-corpus-26-train	اللون البني محبب هذا العام .	اللون البني مرغوب هالسنة.
15950	corpus-6-test-corpus-26-test	فكرة صائبة . متى تخطط للمجيء ؟	فكرة صحيحة. متى بتنوي تيجي؟
15967	corpus-6-test-corpus-26-train	حسنا . مقعدان من فضلك .	ماشي. كرسيين لو سمحت.
15989	corpus-6-test-corpus-26-train	أين السوق ؟	وين السوق؟
16007	corpus-6-test-corpus-26-train	أود قياس بذلة السباق الخاصة بي .	بدي اقيس بدلة السباق تبعتي.
16016	corpus-6-test-corpus-26-train	ظننت أنكم أيها الشباب تأكلون الكعك المخبوز فقط .	فكرت إنكو يا شباب بتوكلوا الكعك المخبوز بس.
16034	corpus-6-test-corpus-26-train	ما سعر تذكرة درجة أولى إلى إدنبره , من فضلك ؟	كم سعر تذكرة درجة أولى لإدنبره , إذا تكرمت.
16042	corpus-6-test-corpus-26-train	يبدو أن النقود التي أعطيتني إياها ناقصة عشر دولارات .	شكله المصاري اللي إنطيتني اياها ناقصة عشر دولارات.
16046	corpus-6-test-corpus-26-train	لقد اتصلت بالسيد سميث في غرفة رقم اثنان صفر واحد منذ لحظات ، لكن لم يرد أحد . هل لك أن ترى هل لا يزال يقيم هنا ؟	رنيت عالسيد سميث بالغرفة اللي رقمها 201 قبل شوي ، بس ما حدا رد. بتقدر تشوف اذا بعدو قاعد هون؟
16061	corpus-6-test-corpus-26-train	أريد واحدة حديثة .	بدي وحدة جديدة.
16070	corpus-6-test-corpus-26-train	أعمل في شركة نشر .	بشتغل بشركة نشر.
16073	corpus-6-test-corpus-26-train	هل لك أن تتفضل وتملأ هذه ؟	بتقدر تتكرم و تعبي هاي؟
16080	corpus-6-test-corpus-26-test	ما هذا الشارع ؟	شو هاظ الشارع؟
16082	corpus-6-test-corpus-26-test	هل لك أن تزن هذا الطرد ؟	بتقدر توزن هالطرد؟
16089	corpus-6-test-corpus-26-train	ماذا تسمون هذا بالإنجليزية ؟	شو بتسموه هاذ بالإنجليزي؟
16091	corpus-6-test-corpus-26-train	ظل سائراً عبر هذا الممر , وستجدها على الجانب الأيمن .	ظل ماشي بالممر هاذ , و رح تلاقيها عالجهة اليمين.
16098	corpus-6-test-corpus-26-train	أريد التأمين على هذا .	بدي أمّن على هاذ.
16106	corpus-6-test-corpus-26-train	صباح الخير . هذا مكتب الاستقبال . هل لي أن أساعدك ؟	صباح الخير. هاذ مكتب الاستقبال.كيف بقدر أساعدك؟
16127	corpus-6-test-corpus-26-train	حسناً . تفضل بالدخول .	ماشي. تعال فوت.
16130	corpus-6-test-corpus-26-test	أجل , سيدي . آتي هنا للإفطار كل يوم , من الاثنين حتى الجمعة , قبل الذهاب للعمل .	أكيد, يا سيدي. بآجي هون عشان الفطور كل يوم, من الاثنين للجمعة، قبل ما أروح على الشغل.
16140	corpus-6-test-corpus-26-dev	لا توجد أية مشاكل .	ما في أي مشاكل.
16141	corpus-6-test-corpus-26-train	من فضلك اتصل لي برقم ثلاثة اثنان ستة اثنان تسعة واحد ثمانية .	لو سمحت، رنلي على الرقم ثلاثة اثنين ستة اثنين تسعة واحد ثمانية.
16158	corpus-6-test-corpus-26-train	أجل , يمكننا القيام بخدمتك بداية من السابعة .	اها، منقدر نخدمك من الساعة السابعة.
16167	corpus-6-test-corpus-26-train	من فضلك استلق هنا .	لو سمحت، اتمدد هون.
16169	corpus-6-test-corpus-26-test	يالها من خدمة سريعة !	شو هاي الخدمة السريعة!
16191	corpus-6-test-corpus-26-train	ربما ستظل ترتفع .	يمكن تظل تطلع.
16217	corpus-6-test-corpus-26-train	من فضلك اتجه يساراً عند التقاطع التالي .	لو سمحت روح عاليسار بالتقاطع الجاي.
16219	corpus-6-test-corpus-26-dev	معذرة . كيف يمكنني الوصول إلى المصرف ؟	معلش، كيف بقدر أوصل للبنك؟
16222	corpus-6-test-corpus-26-train	هل توجد خدمة نقل بالحافلات إلى متحف فورد ؟	في خدمة باصات بتروح على متحف فورد؟
16227	corpus-6-test-corpus-26-train	أجل . اسمك ورقم غرفتك , من فضلك .	نعم. اسمك ورقم غرفتك , لو سمحت .
16231	corpus-6-test-corpus-26-train	كم المدة التي يستغرقه لكي يصل لليابان عن طريق البريد الجوي ؟	قديش بده وقت لحتى يوصل لليابان عن طريق البريد الجوي؟
16238	corpus-6-test-corpus-26-train	حسناً . أراك الساعة الثانية يوم الأحد .	تمام . بشوفك الساعة ثنتين يوم الأحد.
16258	corpus-6-test-corpus-26-train	أريد أن أمر بنيويورك في طريقي إلى تورونتو .	بدي امر على نيويورك بطريقي لتورونتو.
16259	corpus-6-test-corpus-26-train	لقد كسر الزمام المنزلق . هل لديك مزيد من نفس النوع ؟	انكسر السحاب اللي عندي. عندك زيادة من نفس النوع ؟
16271	corpus-6-test-corpus-26-train	هذا ضرب من الدناءة .	هاظا ضرب من الوساخة.
16279	corpus-6-test-corpus-26-dev	هل لك أن تعيد تأكيد رحلتي ؟ هاهي تذكرة الطيران .	ممكن تأكدلي الرحلة مرة تانية؟ هاي تذكرة الطيران.
16291	corpus-6-test-corpus-26-train	هل لديك هذا باللون الأخضر الداكن ؟	عندك هاذ باللون الاخضر الغامق؟
16292	corpus-6-test-corpus-26-test	هل لك أن تأخذني إلى كانتربري وتعيدني إلى هنا ؟	ممكن توديني على كانتربري وترجعني هون؟
16311	corpus-6-test-corpus-26-train	هل لي بشوكة أخرى ؟	بدي شوكة ثانية؟
16312	corpus-6-test-corpus-26-train	شكراً جزيلاً لعطفك .	مشكور كثير على طيبتك.
16335	corpus-6-test-corpus-26-train	آسف ، نحن لا نبيع تذاكر للمسرح .	متأسفين، ما بنبيع تذاكر للمسرح.
16337	corpus-6-test-corpus-26-train	أريد أن أرى هذا .	بدي أشوف هاظا.
16339	corpus-6-test-corpus-26-train	آه ، هذا جميل . ماذا علي أن أصنع ؟	آه، هاذ حلو. شو لازم اعمل؟
16344	corpus-6-test-corpus-26-dev	أريد مد إقامتي هنا ليومين آخرين .	بدي أمدد إقامتي هون يومين ثانيات.
16351	corpus-6-test-corpus-26-train	من فضلك غير مقعدي .	لو سمحت غير مقعدي.
16365	corpus-6-test-corpus-26-train	لدينا جمبري رائع جداً اليوم .	عنا جمبري مميز كثير اليوم.
16371	corpus-6-test-corpus-26-train	إلى أي ساعة متأخرة تظل مفتوحة ؟	لأي ساعة بتظل مفتوحة؟
16395	corpus-6-test-corpus-26-train	للمدخنين أم لا ؟	للي بيدخنو ولا لأ؟
16403	corpus-6-test-corpus-26-train	إنه غالي جدا بالنسبة لي . ألا يمكنك تخفيض السعر قليلاً ؟	هاذ غالي كثير علي. ما بتقدر تنزل السعر شوي؟
16409	corpus-6-test-corpus-26-dev	أنا جاهز صباح الأربعاء أو بعد ظهر الجمعة .	أنا جاهز الأربعا الصبح أو بعد الظهر يوم الجمعة.
16413	corpus-6-test-corpus-26-train	لم أقم بالحجز .	ما عملت حجز.
16434	corpus-6-test-corpus-26-train	لأن الصيف في اليابان عادة ما يكون شديد الحرارة ، ولم يكن لدينا تكييف هواء قديماً .	لأنه الصيف باليابان عادة بكون حامي كثير، وما كان عندنا مكيف هوا زمان.
16444	corpus-6-test-corpus-26-train	هل لك أن تستدعي لي سيارة أجرة الساعة الثامنة صباح غد ؟	ممكن تجيبلي تكسي بكرا الساعة ثمنية الصبح؟
16453	corpus-6-test-corpus-26-train	إنه مريب .	هاذ مشكوك فيه.
16465	corpus-6-test-corpus-26-train	لماذا لا ننتظر الحافلة تحت التندة ؟	ليش ما نستنى الباص تحت المظلة ؟
16477	corpus-6-test-corpus-26-train	تعالى ، كينجي . دعني أريك أرجاء المكتب .	تعال ، كينجي . خليني أوريك حوالين المكتب .
16478	corpus-6-test-corpus-26-train	أجل ، إنها مفتوحة من التاسعة حتى التاسعة .	أها ، هي فاتحة من الساعة تسعة للساعة تسعة.
16484	corpus-6-test-corpus-26-dev	لا أستطيع النوم جيداً أثناء الليل .	ما قدرت أنام مليح بالليل.
16487	corpus-6-test-corpus-26-train	كيف أثر الركود على الشركة ؟	شلون أثر الركود عالشركة ؟
16495	corpus-6-test-corpus-26-train	لدي موعد آخر .	عندي موعد ثاني.
16516	corpus-6-test-corpus-26-train	هل لي بخريطة لطرق المدينة ؟	ممكن خريطة لطرق المدينة؟
16536	corpus-6-test-corpus-26-dev	هذا بعينه ما كنت أبحث عنه .	هاي بالزبط اللي كنت بدور عليه.
16542	corpus-6-test-corpus-26-train	لا أفهم شرحك .	مش فاهم شرحك.
16546	corpus-6-test-corpus-26-train	كان يجب تدبير وسيلة مواصلات . ذاهبة إلى بوسطن .	لازم ندبر طريقة أو سيارة رايحة على بوسطن.
16547	corpus-6-test-corpus-26-train	أين أفضل مكان لمشاهدة المعالم ؟	وين أحسن مكان لشوفة المناظر؟
16576	corpus-6-test-corpus-26-train	هل هي متينة ؟	هي قوية؟
16577	corpus-6-test-corpus-26-train	لقد استمتعت كثيرا .	كيفت كثير .
16581	corpus-6-test-corpus-26-train	حسنا إذاً ، أريد عصا مضرب أصغر كتلك التي مع جوليا روبرتس .	ماشي يعني، بدي عصاة مضرب اصغر مثل اللي مع جوليا روبرتس.
16586	corpus-6-test-corpus-26-train	هل لك أن تأخذ هذا ، من فضلك ؟	ممكن توخذ هاذ، لو سمحت؟
16601	corpus-6-test-corpus-26-train	الركاب المسافرون على خطوط إيه بي سي الجوية رحلة رقم سبعة صفر ثلاثة المتجهة إلى طوكيو التفضل بالتوجه إلى بوابة رقم عشرين لإنهاء الإجراءات الرسمية .	الركاب المسافرين على خطوط إيه بي سي الجوية رحلة رقم سبعة صفر ثلاثة واللي رايحة على طوكيو الرجاء روحوا على البوابة رقم عشرين عشان تخلصوا الأمور الرسمية.
16607	corpus-6-test-corpus-26-train	أين موقف الحافلات ل بي ؟	وين مجمع الباصات ل بي ؟
16643	corpus-6-test-corpus-26-train	الدخول فرداً فردا ، ً من فضلكم .	الفوته واحد واحد ، من فظلكو.
16653	corpus-6-test-corpus-26-dev	من أين يمكنني شراء مفارش مائدة ؟	من وين بقدر اشتري مفارش سفرة؟
16679	corpus-6-test-corpus-26-train	هل يمكنني استئجار مرشداً يتحدث اللغة اليابانية ؟	ممكن أستأجر دليل بسولف ياباني؟
16696	corpus-6-test-corpus-26-train	هل تريدني أن ألتقط لك صورة ؟	بدك ياني اوخذلك صورة؟
16709	corpus-6-test-corpus-26-train	لم يكن لدي هذا الطبق .	ما كان عندي هاظا الصحن.
16718	corpus-6-test-corpus-26-train	لقد قطع إصبعي . هل يوجد مطهر ؟	انجرح اصبعي. في سبيرتو؟
16723	corpus-6-test-corpus-26-train	هل يمكنني الحصول على طابع فئة خمسة وتسعين سنتاً ؟	بتقدر تعطيني طابع بتسعة وتسعين سنتا؟
16736	corpus-6-test-corpus-26-train	سأكون هنا الساعة الثامنة إلى الربع .	رح أكون هون الساعة ثمانية إلا ربع.
16746	corpus-6-test-corpus-26-train	أريد عطراً .	بدي عطر.
16747	corpus-6-test-corpus-26-train	هل لي بجدول مواعيد ؟	أعطيني جدول المواعيد؟
16751	corpus-6-test-corpus-26-test	هل ستذهب إلى المدرسة هنا ؟	رح تروح عالمدرسة هون؟
16758	corpus-6-test-corpus-26-dev	كم كان ثمنها ؟	قديش كان حقها ؟
16760	corpus-6-test-corpus-26-train	هل فندق هيلتون بعيد عن هنا ؟	فندق الهيلتون بعيد من هون؟
16769	corpus-6-test-corpus-26-train	أنا متأكد أنني وضعتها في محفظة الأوراق الخاصة بي .	أنا متأكد إني حطيتها بمحفظة الوراق تاعيتي .
16770	corpus-6-test-corpus-26-train	ارفعوا أيديكم .	ارفعوا إيديكو
16771	corpus-6-test-corpus-26-train	هل يوجد مطعماً يمكنك أن تزكيه بالقرب من هنا ؟	في مطعم بتنصح فيه قريب من هون؟
16773	corpus-6-test-corpus-26-train	أيهما تفضل , داكن أم فاتح ؟	شو بتحب أكثر, غامق أو فاتح؟
16781	corpus-6-test-corpus-26-train	هل لك أن تخبرني عن مكان تحليق الطائرة الآن ؟	بتقدر تحكيلي وين بطير الطيارة هسا؟
16793	corpus-6-test-corpus-26-train	تذكرة نزول وركوب طائرة أخرى من فضلك .	تذكرة نزول وطلوع طيارة ثانية لو سمحت.
16796	corpus-6-test-corpus-26-train	أين يوجد مكان لطيف لقضاء نزهة ليوم واحد ؟	وين بلاقي مكان لطيف أظل فيه رحلة ليوم واحد؟
16799	corpus-6-test-corpus-26-train	أريد حقيبة كيلي حمراء نفس هذا الطراز .	بدي شنتة كيلي حمرا مثل هاذ الموديل.
16805	corpus-6-test-corpus-26-train	هل ستزال تعمل جدول المواعيد ؟	هل رح تظل جدول المواعيد شغّالة؟
16810	corpus-6-test-corpus-26-train	متى يفتح المصرف ؟	أميت بفتح البنك؟
16811	corpus-6-test-corpus-26-train	أشعر بالإعياء .	بحس بالتعب.
16819	corpus-6-test-corpus-26-train	سأرتبك . هل تمانع في رسم خريطة لي ؟	رح أرتبك. ما عندك مشكلة ترسملي خريطة؟
16822	corpus-6-test-corpus-26-test	بالخارج .	برا.
16829	corpus-6-test-corpus-26-test	خذني إلى المستشفى .	خذني على المستشفى.
16833	corpus-6-test-corpus-26-train	هل يجب أن آتي إلى المستشفى كل يوم ؟	لازم آجي على المستشفى كل يوم؟
16837	corpus-6-test-corpus-26-train	معدتي تؤلمني .	بطني بوجعني.
16839	corpus-6-test-corpus-26-train	كم أجرة البريد لإرسال هذا الخطاب إلى اليابان ؟	قديش بده البريد مصاري عشان أرسل هالرسالة لليابان؟
16842	corpus-6-test-corpus-26-train	أريد زجاجة من نبيذ شيري الأسباني .	بدي قنينة من الشيري الأسباني.
16869	corpus-6-test-corpus-26-train	هل تريد أن يأتي أحد ليأخذك من المطار ؟	بدك حدا يجي يوخذك من المطار؟
16872	corpus-6-test-corpus-26-dev	سيبدأ الصعود على متن الطائرة الساعة الرابعة والنصف لذلك من فضلكم كونوا هناك قبل هذا الموعد .	رح يبلش الصعود على الطيارة الساعة أربعة ونص . لذالك لو سمحتو كونو هون قبل هذا الوقت.
16878	corpus-6-test-corpus-26-train	من ثلاثين ألف ين .	من ثلاثين ألف ين.
16879	corpus-6-test-corpus-26-train	من أين يمكنني شراء بطاقة هاتف ؟	من وين بقدر اشتري كرت تلفون؟
16888	corpus-6-test-corpus-26-train	هل يمكنني إعادتها في مدينة مختلفة ؟	بقدر أرجعها بمدينة ثانية؟
16889	corpus-6-test-corpus-26-dev	أخطط للبقاء لمدة اثنا عشر يوماً .	بخطط أظل اثنعشر يوم.
16893	corpus-6-test-corpus-26-train	من فضلك اجعل الجزء العلوي أطول قليلاً .	من فضلك خلي الجزء الفوقاني أطول شوي.
16896	corpus-6-test-corpus-26-train	تحتاج لرؤية أخصائي .	بتحتاج تشوف دكتور متخصص.
16899	corpus-6-test-corpus-26-dev	بضع دقائق أخرى من فضلك .	كم دقيقة كمان اذا سمحت.
16904	corpus-6-test-corpus-26-train	مسار رقم أربعة عشر .	طريق رقم اربعطش.
16911	corpus-6-test-corpus-26-train	آه ، عندك ؟ بالتأكيد إن لديك تشكيلة كبيرة .	أها، عندك؟ طبعا إنت عندك تشكيلة كبيرة.
16928	corpus-6-test-corpus-26-dev	لا أستطيع أن أجدها في أي مكان .	مش قادر ألاقيها بأي مكان.
16936	corpus-6-test-corpus-26-test	هل لديك أي مقاعد شاغرة للندن ؟	عندك اي كراسي فاظية لندن؟
16952	corpus-6-test-corpus-26-train	أريد نسخة من تقرير السرقة .	بدي نسخة من تقرير السرقة.
16955	corpus-6-test-corpus-26-dev	إنها على بعد ناصية واحدة في الشارع .	هيه على بُعد ناصية وحدة بالشارع.
16960	corpus-6-test-corpus-26-train	هل لك أن تعطيني إشارة بالضوء عندما تكون فيها ؟	بتقدر تعطيني إشارة بالضو لما تكون فيها؟
16962	corpus-6-test-corpus-26-test	هل هذه السجائر معتدلة ؟	هاي السقاير معتدلة؟
16964	corpus-6-test-corpus-26-train	حسنا . مثل هذه فسحب .	طيب. زي هاي بس.
16967	corpus-6-test-corpus-26-train	سيأتي القطار السريع التالي بعد ساعة .	راح يجي القطار السريع الجاي بعد ساعة.
16976	corpus-6-test-corpus-26-train	أود أن أجعل أكمام هذا الجاكت الرياضي طويلة .	بدي اعمل اكمام هالجاكيت الرياضي طويلة.
16992	corpus-6-test-corpus-26-train	لدي حجز . هذا هو رقم تأكيد الحجز .	عندي حجز. هاظ هو رقم تأكيد الحجز.
17027	corpus-6-test-corpus-26-train	عيد ميلادك اقترب .	عيد ميلادك قرب.
17030	corpus-6-test-corpus-26-dev	توقفت القطارات بسبب الإضراب .	وقفت القطارات عشان الإضراب.
17038	corpus-6-test-corpus-26-train	هل يمكنك أن تصلح ذلك ؟	بتقدر تصلح هاي؟
17068	corpus-6-test-corpus-26-dev	كان الشارع مزدحماً بالسيارات .	كان الشارع مليان سيارات.
17079	corpus-6-test-corpus-26-train	إنه المبنى الثاني على يسار هذا المبني الأبيض .	البناية الثانية على يسار البناية البيضا.
17094	corpus-6-test-corpus-26-train	حجزنا مقعداً ليوم الخامس والعشرين من أكتوبر في الساعة الحادية عشر صباحاً .	حجزنا مقعد لخمسة و عشرين من شهر عشرة الساعة احدعش الصبح.
17097	corpus-6-test-corpus-26-train	لا . قليلاً في الأمام . هناك ، نعم .	لا. شوي لقدام. هناك، إيوه.
17115	corpus-6-test-corpus-26-train	نعم ، هذا لا يشمل الوجبات .	أيوة، هاذ ما بشمل الأكل.
17117	corpus-6-test-corpus-26-train	أين يمكنني استعادة ثمن هذه التذكرة ؟	وين بقدر ارجّع حق هالتذكرة؟
17120	corpus-6-test-corpus-26-train	لماذا يحدث هذا ؟	ليش بصير هاذ ؟
17149	corpus-6-test-corpus-26-train	أريد أن أحصل على استراحة .	بدي أوخذ بريك.
17158	corpus-6-test-corpus-26-train	لقد تعطلت سيارتي . من فضلك احضر لتأخذها .	سيارتي خربت. تعال خذها لو سمحت.
17163	corpus-6-test-corpus-26-train	أريد أن يكون شعري خلف رأسي أطول قليلاً .	بدي شعري يكون طويل شوي ورا راسي.
17177	corpus-6-test-corpus-26-train	ما هي الأنواع التي لديكم ؟	شو الأنواع اللي عندكم؟
17179	corpus-6-test-corpus-26-dev	أوافق . إنه أحد الأماكن المفضلة لي .	موافق. هاذ واحد من احلا الاماكن عندي.
17180	corpus-6-test-corpus-26-train	ما هو نوع النموذج الذي تفكر فيه ؟	شو نوع النموذج اللي بتفكر فيه؟
17204	corpus-6-test-corpus-26-test	اسمي ميتشكو تاناكا ، ورقم الرحلة إلى طوكيو هو خمسة ، صفر ، واحد .	اسمي ميتشكو تاناكا، ورقم الرحلة لطوكيو هو خمسة، صفر، واحد.
17216	corpus-6-test-corpus-26-train	من فضلك ، هل رسمت لي خريطة بسيطة من هنا ؟	من فضلك، بتقدر ترسملي خريطة سهلة من هون؟
17217	corpus-6-test-corpus-26-train	أين نتقابل ؟	وين بدنا نتلاقى؟
17222	corpus-6-test-corpus-26-train	أود تصفيف شعري بالطريقة التي كان عليها من قبل .	بدي أعمل شعري زي ما كان قبل.
17229	corpus-6-test-corpus-26-train	أعطني خمسين ، من فضلك .	اعطيني خمسين ، إذا سمحت.
17272	corpus-6-test-corpus-26-train	أين يمكنني أن أقوم بإجراءات الدخول للخطوط الجوية اليابانية ؟	وين بقدر أعمل إجراءات الدخول للخطوط الجوية اليابانية ؟
17280	corpus-6-test-corpus-26-train	ما هي المحتويات ؟	شو المكونات؟
17295	corpus-6-test-corpus-26-train	هل هناك أي أماكن في المنطقة تلقي تزكية كثيرة ؟	في أماكن بالمنطقة بتجيب تزكية كثيرة؟
17311	corpus-6-test-corpus-26-train	من فضلك أعطني بعض الفكة .	لو سمحت اعطيني شوية فراطة.
17313	corpus-6-test-corpus-26-train	حسناً . سأتأكد أن حقائبك ستكون هنا .	طيب . راح أتأكد إنه الشناتي رح تكون هون.
17315	corpus-6-test-corpus-26-train	هذا هو طبقنا المميز , سمك موسى المشوي الخاص بدوفر .	هاذ طبقنا الخاص, سمك موسى المشوي الخاص بدوفر.
17339	corpus-6-test-corpus-26-train	سنمكث .	راح نظل.
17350	corpus-6-test-corpus-26-train	لقد تعرضت لعملية سلب .	انسرقت .
17356	corpus-6-test-corpus-26-train	حسناً . هل يجب أن أقوم بتركيزها ؟	ماشي. لازم أساويها مركزة؟
17381	corpus-6-test-corpus-26-dev	سنتقاسم .	رح نتقاسم.
17394	corpus-6-test-corpus-26-train	لا يوجد لدينا نفس الطراز الآن . سأفحص مخزوننا . انتظر دقيقة من فضلك .	ما عنا نفس النوع حالياً. رح أشوف المخزن عنا. استنى دقيقة إذا سمحت.
17398	corpus-6-test-corpus-26-train	ويسكي اسكتلندي وماء من فضلك .	ويسكي اسكتلاندي ومية لو سمحت.
17399	corpus-6-test-corpus-26-train	هذا يبدو رائعاً . ما الثمن ؟	هاذ مبين بجنن. كم سعره ؟
17414	corpus-6-test-corpus-26-train	خذ هذه التذكرة الطبية إلى الصيدلية . يمكنك الحصول على الدواء من هناك .	خذ هالوصفة الطبية للصيدلية. بتقدر توخد الدوا من هنيك.
17438	corpus-6-test-corpus-26-train	لقد طلبت ذلك .	طلبت هاظ.
17453	corpus-6-test-corpus-26-train	نعم , يمكنك أن تتوقف في أي محطة ما بين هنا وشيكاغو .	أيوة, بتقدر توقف بأي محطة مابين هون وشيكاغو.
17460	corpus-6-test-corpus-26-train	من أين يمكنني شراء بعض الهدايا التذكارية ؟	منين بقدر أشتري شوية هدايا تذكارية ؟
17475	corpus-6-test-corpus-26-train	إنها غالية الثمن . لا أستطيع شرائها .	هي غالية كثير . ما بقدر عمشتراها
17482	corpus-6-test-corpus-26-train	هل يمكنني أن أحصل على رقم تليفون إيه بي سي والشركة في شيكاغو من فضلك ؟	بقدر آخذ رقم تليفون إيه بي سي والشركة في شيكاغو لو سمحت؟
17488	corpus-6-test-corpus-26-test	أين الكاتدرائية ؟	وين الكنيسة الكبيرة؟
17496	corpus-6-test-corpus-26-train	كيف تحب أن تأكل البيض ؟	كيف بتحب توكل البيض؟
17504	corpus-6-test-corpus-26-train	يوجد بجانب هذا المبني تحديداً .	هو جنب هاذ المبنى بالتحديد .
17526	corpus-6-test-corpus-26-train	لا , أعتقد أنهم نسوا أن يحضروا واحدة لنا .	لا, بظنهم نسيوا يجيبولنا وحدة.
17537	corpus-6-test-corpus-26-train	حسناً . لقد تم التأكيد . هل يمكننا أن نأخذ رقم تليفونك في حالة الحاجة إلى الاتصال بك ؟	ماشي، اتأكدت . بنقدر نوخذ رقمك تلفونك في حال احتجنا نتصل فيك؟
17548	corpus-6-test-corpus-26-train	ما هو اسم الرسام ؟	شو اسم الرسام؟
17559	corpus-6-test-corpus-26-train	هل أجعله يعاود الاتصال بك عندما يعود ؟	بتحب أخليه يرجع يرنلك بس يرجع؟
17593	corpus-6-test-corpus-26-train	أود أن آخذ هذا .	بدي آخذ هاظا.
17606	corpus-6-test-corpus-26-train	أحب هذه الخدمة بتقديم شامبانيا للتحية بعد الإقلاع . دعني أشرب فى صحتك .	بحب هاي خدمة توزيع شامبانيا للترحيب بعد ما نطير. خليني أشرب بصحتك.
17609	corpus-6-test-corpus-26-train	أربعون دولار يومياً ، بالإضافة إلى ثمانية سنت لكل ميل .	أربعين دولار كل يوم، مع زيادة ثمنية سنت عكل ميل.
17615	corpus-6-test-corpus-26-train	أراهن بخمسة دولارات .	براهن بخمس دولارات .
17636	corpus-6-test-corpus-26-train	هل هذا طلب شخص آخر .	هاظا طلب واحد ثاني؟
17645	corpus-6-test-corpus-26-train	هل قلت لي كيف أذهب إلى المتحف ؟	قلتلي كيف بروح على المتحف؟
17649	corpus-6-test-corpus-26-train	آسف جدا ، لكني أود تأجيل الميعاد .	آسف كثير، بس بدي أجل الموعد .
17652	corpus-6-test-corpus-26-test	هل رشحت لي رحلة قصيرة ؟	هل اخترتلي رحلة قصيرة؟
17660	corpus-6-test-corpus-26-train	سيغادر قطارك من الرصيف رقم ثمانية .	رح يطلع قطارك من السكة رقم ثمانية.
17673	corpus-6-test-corpus-26-train	أبحث عن شنطة بحزام متحرك .	بدور على شنتة فيها قشاط مش ثابت .
17674	corpus-6-test-corpus-26-train	أود أن تبقي تحت مائة وثمانين دولار .	بدي ياها تظل تحت المية وثمانين دولر.
17739	corpus-6-test-corpus-26-train	سأسلك بعد أن ألقي نظرة هنا وهناك .	راح أمشي بعد ما أتفقد هون وهناك.
17745	corpus-6-test-corpus-26-test	نعم ، حجز لمدة ستة أيام من فضلك ، بدء من الثالث والعشرين من يوليو .	ايوه، حجز لست أيام لو سمحت، ببلش من ثلاث وعشرين ستة.
17757	corpus-6-test-corpus-26-train	هل يمكنك أن ترني أشياء أخري ذات تصميمات مختلفة .	ممكن توريني شغلات ثانية بأشكال غير؟
17765	corpus-6-test-corpus-26-train	ما نوع العصير الذي تفضله ؟	شو نوع العصير اللي بتحبه ؟
17780	corpus-6-test-corpus-26-train	هل ستعود لبلادك في الاجازات ؟	راح ترجع على بلدك بالعطل؟
17782	corpus-6-test-corpus-26-dev	أين يمكنني الذهاب لكي أري منظراً رائعاً حقاً ؟	وين بقدر اروح عشان اشوف منظر بجنن فعلا؟
17786	corpus-6-test-corpus-26-test	كان هذا مكسوراً بالفعل عندما فتحت الطرد .	كان هاذ مكسور فعلاً لما فتحت الطرد.
17790	corpus-6-test-corpus-26-test	التاسع والعشرون من أغسطس .	تسعه وعشرين من آب.
17797	corpus-6-test-corpus-26-train	أود أن أرسل ذلك إلى اليابان بالبريد الجوي .	بدي أودي هاي لليابان بالبريد الجوي.
17798	corpus-6-test-corpus-26-train	عيد الشكر والعمال ، فهو يوم الشكر لكل الذين ساندوا المجتمع بأعمالهم .	عيد الشكر و العمال، يوم الشكر لكل الناس اللي ساعدوا المجتمع بشغلهم.
17799	corpus-6-test-corpus-26-train	هذه الغرفة صغيرة جداً .	هاي الغرفة صغيرة كثير.
17803	corpus-6-test-corpus-26-train	هل يمكنني أن أحصل علي مزيد من الشاي ، من فضلك ؟	بقدر آخذ كمان شاي، لو سمحت؟
17805	corpus-6-test-corpus-26-train	أريد أن أغسل ملابسي في وقت لاحق اليوم .	بدي أغسل وعيتي بوقت ثاني اليوم.
17808	corpus-6-test-corpus-26-train	هل يوجد بنك بالقرب من هنا ؟	في بنك قريب من هون؟
17811	corpus-6-test-corpus-26-train	هل من الممكن أن تنظف المنضدة من فضلك ؟	ممكن تنظف الطاولة، لو سمحت؟
17840	corpus-6-test-corpus-26-train	سكين ، من فضلك .	سكينة، لو سمحت.
17841	corpus-6-test-corpus-26-train	هذه كلها مطبوعات .	هاي كلها مطبوعات.
17842	corpus-6-test-corpus-26-train	من فضلك ، اكتب رقم الغرفة في الخلف .	من فضلك ، اكتب رقم الغرفة بقفى الورقة.
17847	corpus-6-test-corpus-26-train	نستخدم الأعواد عندما نأكل .	بنستعمل العيدان لما بنوكل.
17852	corpus-6-test-corpus-26-train	رحلة الطيران دلتا رقم ثمانية وعشرون والمتجهة إلي نيو أورلينز سوف تتأخر حوالي ساعة .	رحلة الطيارة دلتا رقم ثمانية وعشرين اللي رايحة على نيو أورلينز حتى تتأخر حوالي ساعة.
17854	corpus-6-test-corpus-26-train	عندما أعود ثانية إلى اليابان ، سأكتب خطاباً . وإذا كان لديك وقت ، من فضلك أرسل لي خطاباً .	لما أرجع مرة ثانية لليابان، رح أكتب رسالة. وإذا كان عندك وقت، تكرم ابعثلي انا رسالة.
17855	corpus-6-test-corpus-26-train	نسيت تذكرة الطيران الخاصة بي في الفندق .	نسيت تذكرة الطيارة قيتي بالفندق.
17861	corpus-6-test-corpus-26-train	غرفة مفردة بدون دش من فضلك .	غرفة مفردة بدون دش لو سمحت .
17869	corpus-6-test-corpus-26-train	أشكرك ثانية لأنك ذكرتني . هل يميل كثير من الناس أن ينسوا توقيع أسمائهم ؟	بشكرك مرة ثانية عشان ذكرتني. بروح كثير من الناس تنسى توقع ع أسمائهم ولا شو؟
17886	corpus-6-test-corpus-26-train	حسناً . ليس لدينا وقت . هل يمكن أن نكمل هذه المناقشة يوم الخميس في الساعة الواحدة ؟	طيب . ما عنا وقت . منقدر نكمل هاي المناقشة يوم الخميس الساعة وحدة ؟
17899	corpus-6-test-corpus-26-test	أود بعض البيجامات .	بدي بيجامات.
17919	corpus-6-test-corpus-26-train	حسناً . سأتصل بك عندما يكونوا جاهزين .	ماشي. راح أتصل فيك لما يكونو جاهزين.
17935	corpus-6-test-corpus-26-train	ماذا عن الغداء ؟	شو عن الغدا؟
17947	corpus-6-test-corpus-26-test	ستقف الليموزين عند البوابة الشمالية أولاً .	الليموزين رح توقف عند البوابة الشمالية أول شي.
17963	corpus-6-test-corpus-26-train	إلى متي يظل مطعم الفندق متاحا للاستخدام من قبلي ؟	لمتى بظل مطعم الفندق مفتوح حتى أقعد فيه؟
17966	corpus-6-test-corpus-26-dev	هل هذا قطار مباشر ؟	هاذ القطار مباشر؟
17977	corpus-6-test-corpus-26-train	حسنا , الوقت متأخر إلى حد ما . أعتقد أنني يجب على أن أغادر الآن . شكرا جزيلا لك على الأمسية الرائعة .	ماشي, الوقت صار متأخر شوي. بظن انو لازم اروّح هسا. كتير شكرا على الليلة الممتعة.
17986	corpus-6-test-corpus-26-train	هل لي أن أتناول بعض الدواء لآلام في معدتي ؟	ممكن آخذ شوية دوا للوجع بمعدتي؟
18003	corpus-6-test-corpus-26-train	أود أن أتناول فراخ مشوية .	بدي اوكل جاج مشوي.
18018	corpus-6-test-corpus-26-train	إنه خطئي . ليس خطأك .	هاي غلطتي. مش غلطتك.
18036	corpus-6-test-corpus-26-train	معذرة , متي ينتهي هذا الفيلم ؟	عفواً, متى بخلص هذ الفلم؟
18040	corpus-6-test-corpus-26-train	هذا , من فضلك .	هاظ ، لو سمحت.
18077	corpus-6-test-corpus-26-train	لقد سرقت مجوهراتي . أنني بحاجة لتقديم بلاغ .	سرقوا صيغتي . لازم أقدم شكوى.
18103	corpus-6-test-corpus-26-train	لحظة فقط , من فضلك . سأوصلك بالسيد جونز .	لحظة بس، لو سمحت. راح أشبكك مع الأستاذ جونز.
18110	corpus-6-test-corpus-26-train	مرحبا . هذه هي الخطوط الجوية المتحدة .	مرحبا . هاي هي الخطوط الجوية المتحدة .
18131	corpus-6-test-corpus-26-test	أين تعلم السيد جونز اللغة اليابانية ؟	وين السيد جونز تعلّم اللغة اليابانية؟
18138	corpus-6-test-corpus-26-train	لدي واحدة صغيرة من نفس التصميم .	عندي وحدة صغيرة من نفس التصميم.
18155	corpus-6-test-corpus-26-train	هل يمكنك ترتيب هذه البناطيل ؟	ممكن تصفط هالبناطيل؟
18161	corpus-6-test-corpus-26-train	مساء الجمعة , في التاسعة .	مسا الجمعة, عالتسعة.
18166	corpus-6-test-corpus-26-train	هل هذه هي البوابة إلي لاس فيجاس ؟	هاي البوابة لـ لاس فيجاس؟
18181	corpus-6-test-corpus-26-train	هل لديك أتوبيس من المطار ؟	عندك باص من المطار؟
18189	corpus-6-test-corpus-26-train	ملعقة أخرى , من فضلك .	معلقة ثانية, لو سمحت.
18211	corpus-6-test-corpus-26-train	إنها مالحة قليلا , لكنني أحبها . هل أحضرتها معك طوال الطريق من اليابان ؟	هي شوي مالحة، بس بحبها. جبتها معك من اليابان طول الطريق؟
18226	corpus-6-test-corpus-26-train	قم بدفعها من فضلك , إن كان ذلك ممكنا .	لو سمحت دزها , إذا بصير
18254	corpus-6-test-corpus-26-train	هل من الممكن أن تدفع مبلغ عشرة دولارات للمقدم ؟	بصير تدفع عشرة دولارات للمقدم؟
18264	corpus-6-test-corpus-26-train	نعم . أيقظني من النوم بعد ثلاثة ساعات , من فضلك .	أيوة . صحيني من النوم بعد ثلاث ساعات, لو سمحت.
18273	corpus-6-test-corpus-26-dev	أود أن أطلب , من فضلك .	بدي أطلب , بعد إذنك.
18274	corpus-6-test-corpus-26-test	هل يجب على أن أجيب بـ نعم أو بـ لا ؟	لازم اجاوب بـ اه أو بـ لأ ؟
18282	corpus-6-test-corpus-26-train	ملعقتين , من فضلك .	معلقتين , لو سمحت.
18323	corpus-6-test-corpus-26-train	ما هي المحطة القادمة ؟	شو هي المحطة الجاية ؟
18334	corpus-6-test-corpus-26-dev	السيارة تصدر صاخبا غريبا .	السيارة بطلع صوت غريب وعالي.
18336	corpus-6-test-corpus-26-test	متي يغلق مكتب البريد أبوابه ؟	متى بيسكر مكتب البريد ؟
18338	corpus-6-test-corpus-26-dev	لقد دفعت من قبل خمسون دولارا كعربون حينما قمت بتسجيل إجراءات إقامتي بالفندق .	دفعت قبل هيك خمسين دولار عربون لما سجلت بياناتي بالفندق.
18341	corpus-6-test-corpus-26-train	هل تناولت دواء لتقلبات المعدة ؟	أخذت دوا للمعدة؟
18342	corpus-6-test-corpus-26-train	هل أحتاج إلى أن أرتدي معطف و رابطة عنق ؟	بحتاج ألبس كبوت و قرافة؟
18344	corpus-6-test-corpus-26-train	هل يمكنني أن أحول أموال إلى حساب المدخرات الخاص بي ؟	ممكن احول مصاري لحساب التوفير تاعي؟
18355	corpus-6-test-corpus-26-train	لقد نسيت أن آخذ حقيبتي اليدوية .	نسيت آخذ شنتة الإيد.
18382	corpus-6-test-corpus-26-train	أود إعادة التأكيد على حجز الرحلة .	بدي أكد مرة ثانية على حجز الرحلة.
18401	corpus-6-test-corpus-26-train	ساعتي . لقد كانت ساعة رقمية ماركة حديثة سويسرية الصنع .	ساعتي. كانت ساعة ديجيتال من ماركة سويسرية جديدة.
18409	corpus-6-test-corpus-26-test	لقد اجتزت هذا الاختبار بنجاح كبير .	عديت الامتحان بنجاح كبير .
18412	corpus-6-test-corpus-26-dev	أريدك أن تصحبني إلى بعض الأماكن الشيقة . أنني سائح , أنت تعرف .	بدي اياك توخذني معك على بعض الأماكن الحلوة. أنا سايح, إنت بتعرف.
18419	corpus-6-test-corpus-26-train	هل يمكن أن أذهب لمشاهدة المعالم أثناء رسو السفينة في الميناء ؟	بقدر أروح اشوف المناظر لما السفينة تكون راسية بالمينا؟
18437	corpus-6-test-corpus-26-train	من الأفضل أن تضبط المرآة العاكسة للرؤية الخلفية .	أحسن شي تزبط المراية الخلفية.
18440	corpus-6-test-corpus-26-dev	ستنتظر حوالي عشرة دقائق أو ما يقارب ذلك .	رح تستني حوالي عشر دقايق أو هيك شي.
18441	corpus-6-test-corpus-26-train	هل يمكن أن آخذ الأطباق الخاصة بك ؟	ممكن آخذ صحونك؟
18451	corpus-6-test-corpus-26-train	سأكون سعيدا بذلك . متى ترغب في ذلك ؟	رح اكون مبسوط لهالشي. متى بدك ياه؟
18487	corpus-6-test-corpus-26-train	أعتقد أنني تركت كاميرتي وغادرت عندما كنت أتناول العشاء هنا الليلة الماضية .	بظن اني تركت كميرتي و روحت لما كنت اكل هون امبارح عالعشا.
18492	corpus-6-test-corpus-26-train	اجمعهم عند البوابة .	جمعهم عند البوابة.
18502	corpus-6-test-corpus-26-train	أوه ، لا . لن يكون هذا ضرورياً . أستطيع أن اعتني به . لقد قمت بالفعل بما هو اكثر من كاف .	أوه ، لا . هاذ مش ضروري . أنا بقدر أدبر بالموضوع. صراحة أنت سويت أكثر من اللازم.
18519	corpus-6-test-corpus-26-train	إما أن تصلحها أو تستبدلها ، من فضلك .	يا تصلحها يا تبدلها، لو سمحت.
18521	corpus-6-test-corpus-26-train	يمكنني القيام بها في وقتا ما الشهر القادم .	ممكن اعملها اي وقت بالشهر الجاي.
18527	corpus-6-test-corpus-26-train	من فضلك تروى .	لو سمحت هدي.
18531	corpus-6-test-corpus-26-train	كيف يتم مقارنة هذا المنتج الجديد مع المنتجات الموجودة ؟	كيف بدنا نقارن هاذ المنتج الجديد مع المنتجات اللي عنا؟
18540	corpus-6-test-corpus-26-train	موظفو المبيعات في هذا المتجر لطفاء جداً .	موظفين المبيعات بهاذ المحل لطيفين كثير.
18552	corpus-6-test-corpus-26-train	هلا احتفظت بهذا لي ؟	ممكن تظبلي هاد؟
18562	corpus-6-test-corpus-26-train	دقيقة فقط ، من فضلك .	ديقة بس، لو سمحت.
18569	corpus-6-test-corpus-26-train	هل لديك بطاقات ادعائك ؟	عندك انت بطاقات دعوتك؟
18572	corpus-6-test-corpus-26-train	أرغب في تأجير سيارة لمدة أسبوع .	حاب أستأجر سيارة لمدة أسبوع.
18580	corpus-6-test-corpus-26-train	نعم , في بادئ الأمر ، اغسليها على منفصلة .	أيوة, بالأول, غسليها لحالها.
18585	corpus-6-test-corpus-26-train	من فضلك أرني بعض الساعات الرجالي .	بعد إذنك ورجيني بعض الساعات الرجالي.
18595	corpus-6-test-corpus-26-train	إنها أربعة عشرة .	هاي أربعطعش.
18612	corpus-6-test-corpus-26-dev	كم تتكلف الليموزين للذهاب إلى وسط المدينة ؟	قديش تكلف الليموزين عشان نروح عوسط البلد؟
18614	corpus-6-test-corpus-26-train	منذ هذا الصباح .	من الصبح.
18617	corpus-6-test-corpus-26-train	من الأفضل أن نسرع . انهم يركبون بالفعل .	أحسن لو نسرع، همه بالفعل ركبو.
18632	corpus-6-test-corpus-26-test	أنها مناسبة تماما .	زابطة تماما.
18639	corpus-6-test-corpus-26-train	طلبت دجاجا .	طلبت جاج.
18640	corpus-6-test-corpus-26-train	لمدة عشرة أيام .	لعشر إيام.
18642	corpus-6-test-corpus-26-train	كم عمر هذا الصبي ؟	قديش عمر هالولد؟
18643	corpus-6-test-corpus-26-train	كم التكلفة كلها ؟	قديش الكلفة كلها؟
18646	corpus-6-test-corpus-26-train	أريد نفس الشيء ، من فضلك .	بدي نفس الشي، لو سمحت.
18685	corpus-6-test-corpus-26-train	لقد فقدت شيكاتي السياحية .	ضيعت الشيكات السياحية تبعتي.
18687	corpus-6-test-corpus-26-train	من فضلك أعطني دواء للبرد .	من فظلك عطيني دوا للرشح.
18690	corpus-6-test-corpus-26-train	من فضلك ضعها في قمع .	لو سمحت حطها ببوري.
18725	corpus-6-test-corpus-26-train	أراه دائما كل صباح في القطار .	بشوفه دايما كل صبح في القطار.
18727	corpus-6-test-corpus-26-train	هل تستطيع أن تتناول العشاء معنا هذا المساء ؟	بتقدر تتعشى معنا الليلة؟
18747	corpus-6-test-corpus-26-train	سأقيم في فندق بي حتى غداً . أكون مسروراً إذا أخبرته أنني هنا .	راح أقعد بفندق بي لبكرا. بكون مبسوط لو خبرته إني هون.
18770	corpus-6-test-corpus-26-train	تأجلت الرحلة الجوية لمدة خمسة وأربعين دقيقة .	الطيارة تأجلت خمسة و أربعين دقيقة.
18771	corpus-6-test-corpus-26-train	اسمى شينو يامادا .	إسمي شينو يامادا.
18784	corpus-6-test-corpus-26-train	ما هو تخصص هذا المطعم ؟	بشو متخصص هاذ المطعم
18798	corpus-6-test-corpus-26-test	لدينا نبيذ أبيض ممتاز .	عندنا واين ابيض ممتاز .
18830	corpus-6-test-corpus-26-train	فقط دواء للبرد .	بس دوا للفلونزا.
18834	corpus-6-test-corpus-26-dev	هل تستطيع إنزال أمتعي إلى الردهة غداً صباحاً ؟	ممكن تنزل أغراضي على الردهة بكرة الصبح؟
18836	corpus-6-test-corpus-26-train	أوه ، يبدو أنني افقد شيء ما كل وقت أسافر فيه .	أوه، شكلني بضيع اشي كل مرة بسافر فيها.
18845	corpus-6-test-corpus-26-train	فقدت استخدام الذراع الأيمن .	بطلت أقدر أستخدم إيدي اليمين
18847	corpus-6-test-corpus-26-train	هالو ، هل هذه تعود إلى روي ؟	مرحبا، هاي لروي؟
18848	corpus-6-test-corpus-26-test	عندئذ ، ستأتي إلى شارع تسوق . إذا سلكت الشارع ستصل إلى المحطة .	بالوقت هاظ، رح تيجي على شارع للتسوق. اذا مشيت هالشارع رح توصل عالمحطة.
18872	corpus-6-test-corpus-26-train	لا ، ليس هنا . هناك حجرة تدخين قرب مؤخرة هذه الحافلة .	لا، مش هون. في غرفة تدخين قريبة بآخر هاذ الباص.
18877	corpus-6-test-corpus-26-train	هل لي بدليل سياحي ؟	ممكن مرشد سياحي؟
18879	corpus-6-test-corpus-26-train	كن هناك بحلول التاسعة ، من فضلك .	كون هناك على الساعة تسعة، لو سمحت.
18906	corpus-6-test-corpus-26-train	نعم ، سيدي . كيف تريدني أن اقطعها ؟	أيوة ، يا سيدي . كيف بدك إني أقصها؟
18912	corpus-6-test-corpus-26-test	اعتقد أن هناك خطأ في الفاتورة .	بظن انو في غلط بالفاتورة.
18917	corpus-6-test-corpus-26-train	زيت و خل فقط سيكون جيداَ .	زيت وخل بس رح يكون مليح.
18919	corpus-6-test-corpus-26-train	لقد فهمت ما أردت أنت بالضبط . هل لي أن اقترح ذلك ؟	فهمت شو بدك بالضبط. ممكن اقترح هيك؟
18938	corpus-6-test-corpus-26-train	قهوة بالسكر .	قهوة مع سكر.
18948	corpus-6-test-corpus-26-train	إنها سبعة عشر ايه . اوه ، انا آسف . لقد أخطأت .	هي سبعتعشر ايه . اوه ، أني آسف . غلطت
18951	corpus-6-test-corpus-26-test	هل سمعت من قبل عن أسبوع ذهبي في اليابان ؟	سمعت قبل هيك عن الاسبوع الذهبي باليابان؟
18957	corpus-6-test-corpus-26-train	شكراً لك . من فضلك عاود مرة أخرى .	مشكور. يلا جرب مرة ثانية من فضلك.
18963	corpus-6-test-corpus-26-test	هل هو محجوز بالكامل ؟	هو محجوز كله؟
18974	corpus-6-test-corpus-26-test	هل يمكنني تركها في أي مكان من البلاد ؟	بقدر أسيبها بأي مكان بالبلد؟
18986	corpus-6-test-corpus-26-test	ما الرقم الذي أطلب منه هنا ؟	شو الرقم اللي بطلب منه هون؟
19002	corpus-6-test-corpus-26-train	كيف يمكنني الذهاب إلى ديزني لاند ؟	شلون بقدر أروح على ديزني لاند؟
19005	corpus-6-test-corpus-26-train	أتظن ذلك ؟	بتظن هيك؟
19007	corpus-6-test-corpus-26-train	معذرة . أين المطعم الرئيسي ؟	عفواً . وين المطعم الرئيسي؟
19009	corpus-6-test-corpus-26-train	أريد الاتصال هاتفياً باليابان .	بدي أتصل بالتيلفون على اليابان.
19036	corpus-6-test-corpus-26-test	رقم مقعدي دي اثنا عشر . أين هو ؟	رقم كرسيي دي اثنعش. وين هو؟
19037	corpus-6-test-corpus-26-dev	ما هذا من فضلك ؟	شو هاظ لو سمحت؟
19038	corpus-6-test-corpus-26-train	ما النمط الذي في مخيلتك ؟	شو النمط اللي بخيالك؟
19045	corpus-6-test-corpus-26-train	أجل . سنصل في الثامنة حسب التوقيت المحلي .	أها. رح نوصل الساعة ثمنية بالتوقيت المحلي.
19050	corpus-6-test-corpus-26-train	إن عثرت على شيء ، اتصل بي من فضلك .	لو لقيت إشي، رنلي إذا تكرمت.
19057	corpus-6-test-corpus-26-train	هل لي في شيء من لحم الخنزير والبيض ؟	ممكن شوية من لحم الخنزير والبيض؟
19064	corpus-6-test-corpus-26-train	شراب الشمام كحلاء ، من فضلك .	عصير الشمام كحلو ، لو سمحت.
19068	corpus-6-test-corpus-26-train	المياه الساخنة ليست ساخنة بالقدر الكافي .	المية الحامية مش حامية بشكل كافي.
19085	corpus-6-test-corpus-26-train	هل يمكنك توضيح كيفية عمل ذلك ؟	ممكن تشرحلي كيف بشتغل هاذ؟
19094	corpus-6-test-corpus-26-train	من فضلك سجل عنوان الاتصال بك هنا .	من فضلك اكتب عنوانك للتواصل معك هون.
19100	corpus-6-test-corpus-26-train	هل يمكنني استخدام إِشارة ضوئية ؟	ممكن استعمل إشارة ضوئية؟
19101	corpus-6-test-corpus-26-train	شكراً . عد إلى غرفتي في نفس الوقت غدا . ستكون الصور جاهزة . قبل ذلك .	مشكور، ارجع لغرفتي بنفس الوقت بكرة . الصور رح تكون جاهزة . قبل هيك .
19103	corpus-6-test-corpus-26-train	آسف فالآن لا يمكنك الطلب سوى من قائمة الطعام الليلية .	آسف، هسا ما بتقدر تطلب إلا من القائمة الليلية بس.
19113	corpus-6-test-corpus-26-train	برصاص أم بدون رصاص ؟	برصاص ولا بدون رصاص
19144	corpus-6-test-corpus-26-train	أشعر بصداع .	بحس بصداع.
19147	corpus-6-test-corpus-26-test	هذه هي الغرفة اثنا عشر صفر سبعة .	هاي هي الغرفة اثنعش صفر سبعة.
19148	corpus-6-test-corpus-26-test	أريد غرفة أخرى .	بدي غرفة ثانية.
19156	corpus-6-test-corpus-26-train	كم مدة صلاحية هذه الفيزا ؟	كم مدة صلاحية هاي الفيزا ؟
19162	corpus-6-test-corpus-26-train	هل ثمة مستشفى قريب من هنا ؟	في مستشفى قريب من هون؟
19170	corpus-6-test-corpus-26-train	أريد بزة .	بدي سترة.
19196	corpus-6-test-corpus-26-train	ألديك مقاس أوسع ؟	عندك حجم أوسع ؟
19215	corpus-6-test-corpus-26-test	هل يمكن أن أقيس مقاس تسعة .	ممكن أقيس مقاس تسعة ؟
19217	corpus-6-test-corpus-26-train	أريد فندقاً آمنا يقدم إفطاراً جيدا ، من فضلك ؟	بدي فندق آمن ، بقدم فطور كويس ، لو سمحت ؟
19226	corpus-6-test-corpus-26-train	أين حديقة الحيوان ؟	وين حديقة الحيوانات؟
19232	corpus-6-test-corpus-26-train	هل لديك أحجام أكبر ؟	عندك أحجام أكبر؟
19250	corpus-6-test-corpus-26-dev	ثلاثون دولاراً وثمانون سنتا .	ثلاثين دولار وثمانين سنت.
19251	corpus-6-test-corpus-26-train	يتوقف الأمر على درجة حرارة المكان . ولكن في وسط اليابان , في أوائل أبريل .	الأمر بتعتمد على حرارة المكان. بس بوسط اليابان, بأول نيسان.
19258	corpus-6-test-corpus-26-train	أريد سندويتش برجر بالجبن ومقليات .	بدي ساندويشة برغر بالجبنة ومقالي.
19269	corpus-6-test-corpus-26-train	لقد بالغ آخر قطار في التأخر .	اخر قطار تأخر كثير.
19281	corpus-6-test-corpus-26-train	ليس معي فكة صغيرة .	ما معي فراطة.
19294	corpus-6-test-corpus-26-train	هل أخذت تذكرة الحافلة ؟	اخذت تذكرة الباص؟
19306	corpus-6-test-corpus-26-train	البطاقة الائتمانية ، من فضلك .	الفيزا , لو سمحت.
19307	corpus-6-test-corpus-26-train	كنت على رحلة يونيتد إيرلاينز رقم ثمانية اثنان ثمانية .	كنت برحلة يونايتد إيرلاينز الرقم ثمانية اثنين ثمانية.
19317	corpus-6-test-corpus-26-train	إن حول غرفتي ضجيجا بالغا .	في ضجة كبيرة حوال غرفتي
19318	corpus-6-test-corpus-26-train	على الساحل الشرقي ، تجد أيضاً أماكن شهيرة . مثل نيويورك ، واشنطن ، دي دي وبوسطن .	على الساحل الشرقي، بتلاقي كمان أمكان معروفة. زي نيويورك, واشنطن, دي دي وبوسطن.
19327	corpus-6-test-corpus-26-train	هل لديك صحف يابانية ؟	عندك جرايد يابانية؟
19329	corpus-6-test-corpus-26-train	هذا طيب ، على ما يبدو .	هاذ طيب ، من شكله.
19346	corpus-6-test-corpus-26-train	هل تمانع في أن أترك حقائبي معك حتى الساعة الواحدة ؟	بتمانع لو أترك شناتيي عندك لحد الساعة وحدة؟
19347	corpus-6-test-corpus-26-train	هل ثمة رحلة في المدينة ؟	في رحلة بالبلد؟
19360	corpus-6-test-corpus-26-train	أجل . أخشى أني مضطر لذلك . ما مدى حفظ الأمن في هذه المنطقة ؟	أكيد. خايف أنو مجبور على هيك. قديش الأمان مطمن بالمنطقة هاي؟
19391	corpus-6-test-corpus-26-train	أفهم ذلك . أحاول استئجار سيارة سيتروين .	بفهم هالاشي. بحاول أستأجر سيارة سيتروين.
19401	corpus-6-test-corpus-26-dev	لدي موهبة فطرية .	عندي موهبة طبيعية.
19413	corpus-6-test-corpus-26-train	هذا رائع . أين الخبز ؟	هاذ ممتاز . وين الخبز؟
19415	corpus-6-test-corpus-26-train	ركن المدخنين ، من فضلك . وشباك بجوار النافذة ، من فضلك .	ركن الشيشانيين، إذا سمحت. وشباك جمب النافذة، إذا سمحت.
19423	corpus-6-test-corpus-26-train	كم تتقاضى نظير التفصيل ؟	قديش بتوخذ بدال التفصيل؟
19444	corpus-6-test-corpus-26-dev	أيهما أسرع : سيارة أجرة أم إسعاف ؟	أي وحدة أسرع: تكسي ولا سيارة الإسعاف؟
19460	corpus-6-test-corpus-26-train	هل لديك ألوان أخرى لهذا التي شيرت ؟	عندك الوان ثانية لهاظا التيشيرت؟
19463	corpus-6-test-corpus-26-test	ينبغي ألا تشاهد التليفزيون طوال الوقت .	لازم ما تتفرج على التلفزيون طول الوقت.
19466	corpus-6-test-corpus-26-train	أجل ، إننا على وشك معالجته ، على وشك معالجته .	أه، احنا على وشك نعالجه, على وشك نعالجه.
19467	corpus-6-test-corpus-26-train	من الأفضل لك أن تدخل مستشفانا .	أحسنلك تدخل مستشفانا.
19469	corpus-6-test-corpus-26-train	أين يمكنني أن أجد سوبر ماركت ؟	وين بقدر الاقي سوبرماركت؟
19475	corpus-6-test-corpus-26-train	إنه غالي الثمن إلى حد ما . ألا يمكنك منحي خصماً ؟	هاد كثير غالي. ما فيك تعطيني شوية خصم؟
19479	corpus-6-test-corpus-26-train	كم محطة قبل التحويل ؟	كم محطة قبل الدوار؟
19490	corpus-6-test-corpus-26-train	لقد سرق ذلك الرجل كيس نقودي .	هذاك الزلمة سرق صرة المصاري تاعتي.
19494	corpus-6-test-corpus-26-train	حبوب عسر الهضم تختلف عن حبوب ألم المعدة ، أليس كذلك ؟	حبوب عسر الهضم بتختلف عن حبوب وجع المعدة، مش هيك؟
19497	corpus-6-test-corpus-26-test	أريد أن أرى الميناء .	بدي اشوف المينا.
19500	corpus-6-test-corpus-26-test	فكرة جميلة .	فكرة حلوة.
19501	corpus-6-test-corpus-26-train	كم تستغرق مشياً على الأقدام ؟	قديش بتوخذ وقت مشي عالجرين؟
19505	corpus-6-test-corpus-26-train	سآخذ عشرين دب لعبة من أكبر حجم .	راح آخذ عشرين دب لعبة من الحجم الكبير.
19507	corpus-6-test-corpus-26-dev	ما هو رقم الصراف ؟	شو رقم الصراف؟
19508	corpus-6-test-corpus-26-train	الأمر يسير . سأنظر في دليل الهاتف فحسب .	الأمور بسيط. رح أشوف بدليل التلفون بس.
19509	corpus-6-test-corpus-26-dev	هل لديك غرف أكبر ؟	عندك غرف أكبر؟
19547	corpus-6-test-corpus-26-train	كم فاتورة الحساب ؟	قديش الفاتورة ؟
19548	corpus-6-test-corpus-26-train	أود الإقامة بهذه الغرفة ليلة واحدة أخرى .	بدي أظل بهاي الغرفة ليلة ثانية.
19560	corpus-6-test-corpus-26-train	معذرة . ولكني أريد تسليم تقرير السرقة .	معلش، بس بدي أسلم تقرير السرقة.
19572	corpus-6-test-corpus-26-train	حسنا ، الأمر يتوقف على وسيلة المواصلات التي تأخذها . هل ستذهب بالحافلة أم الطائرة ؟	ماشي، الأمور بتعتمد على الطريقة اللي بتروح فيها. رايح بالباص ولا الطيارة؟
19578	corpus-6-test-corpus-26-train	هل تمانع في جلوسي هنا ؟	بتمانع لو اقعد هون؟
19581	corpus-6-test-corpus-26-train	هل يمكنني أن أرسل أي ميل واحد فقط قيمته دولار .	بقدر أبعث أي ميل واحد تكلفته بس دولر؟
19589	corpus-6-test-corpus-26-train	أجل ، من فضلك أرسله إلى الغرفة اثنا عشر أربعة وثلاثون .	أيوه، لو سمحت وديه على الغرفة اثنعش أربعة وثلاثين.
19610	corpus-6-test-corpus-26-dev	املأ استمارة التسجيل هذه , من فضلك .	عبي هاي الاستمارة, لو سمحت.
19617	corpus-6-test-corpus-26-test	أريد تذكرتين ذهاب وعودة إلى أكسفورد .	بدي تذكرتين روحة رجعة على أكسفورد.
19619	corpus-6-test-corpus-26-train	متى يتعين على الوصول إلى المطار ؟	متى لازم أكون بالمطار؟
19620	corpus-6-test-corpus-26-train	هذه السرعة بطيئة .	هاي السرعة بطيئة.
19623	corpus-6-test-corpus-26-train	أين يمكنني طباعة الفيلم ؟	وين بقدر أطبع الفلم؟
19643	corpus-6-test-corpus-26-test	كلا ، من فضلك لا تفعل ذلك هلا ادخرت أسئلتك حتى نهاية حديثي ، لحين طلبها .	لا، لو سمحت لا تساوي هيك احتفظ بأسئلتك لبعد ما اخلص حكيي، لما اطلبهن منك.
19648	corpus-6-test-corpus-26-dev	أريد مقعداً جيداً .	بدي مقعد زين.
19649	corpus-6-test-corpus-26-train	آسف الحمام به عطل . أحتاج للمساعدة .	آسف، الحمام فيه عطل. بحتاج للمساعدة.
19651	corpus-6-test-corpus-26-test	ليس به صعوبة أو غموض .	ما فيه صعوبة أو غموض.
19654	corpus-6-test-corpus-26-train	سأذهب بك على مقعدك . من هنا ، من فضلك .	راح اوديك على كرسيك. من هون، لو سمحت.
19656	corpus-6-test-corpus-26-train	معذرة ، هل يسعني أن أتوجه إليك بسؤال ؟	معلش، بقدر أوجهلك سؤال؟
19666	corpus-6-test-corpus-26-train	أعتقد ذلك .	بظن هيك .
19675	corpus-6-test-corpus-26-train	أهلا . فرصة سعيدة .	مرحبا. فرصة طيبة.
19691	corpus-6-test-corpus-26-train	أريد فحص هذه الحقائب المتجه إلى طوكيو , من فضلك .	بدي اتفقد هالشناتي اللي رايحة لطوكيو، لو سمحت.
19694	corpus-6-test-corpus-26-train	هل يمكنك أن تريني حجماً أكبر بقليل ؟	ممكن توريني سايز اكبر شوي؟
19703	corpus-6-test-corpus-26-train	أظن أن الملابس المصنوعة في اليابان قد جرى تفصيلها على نحو أفضل بالتأكيد .	بتوقع انو الأواعي اللي صنعت في اليابان تفصلت بطريقة أحسن أكيد.
19715	corpus-6-test-corpus-26-train	الأجدر بك أن تكف عن ذلك .	أحسنلك تبطل هالاشي.
19716	corpus-6-test-corpus-26-dev	أعد ذلك , من فضلك .	عيدها، لو سمحت.
19722	corpus-6-test-corpus-26-train	هل يمكنك تسجيل العنوان ورقم الهاتف من أجلي ، من فضلك ؟	ممكن تسجلي العنوان ورقم التلفون عشاني، لو سمحت؟
19726	corpus-6-test-corpus-26-train	هل بها جهاز تدفئة ؟	بيها جهاز تدفئة؟
19732	corpus-6-test-corpus-26-train	من أي المطارات سأغادر ؟	من أي مطار رح أطلع؟
19733	corpus-6-test-corpus-26-train	ألم تتلق الاستمارة بالطائرة ؟	ما أخذت الاستمارة بالطيارة؟
19735	corpus-6-test-corpus-26-train	أريد مكواة .	بدي مكوى.
19752	corpus-6-test-corpus-26-dev	لقد بلغ ثمانية وثلاثين دولاراً إجمالا .	صار ثمانية وثلاثين دولر كله.
19754	corpus-6-test-corpus-26-train	شكراً على إدلائك بأفكارك الفريدة معنا .	مشكور على ما وضعتلنا ياه من أفكارك الخاصة.
19755	corpus-6-test-corpus-26-train	إني أتزلك مرتين في الشهر خلال الموسم .	أنا بنزلك مرتين بالشهر طول الموسم.
19760	corpus-6-test-corpus-26-train	ولدت في أول أبريل سنة ألف وتسعمائة وخمس وخمسين .	انولدت بواحد نيسان سنة ألف وتسعمية وخمس وخمسين.
19769	corpus-6-test-corpus-26-test	هل يمكنني أن أستأجر مضارب راكيت ؟	ممكن استأجر مظارب راكيت؟
19809	corpus-6-test-corpus-26-train	أهذه هي الحافلة التي توصل إلى وسط المدينة ؟	هاظ هو الباص اللي بوصل لوسط البلد؟
19813	corpus-6-test-corpus-26-train	بكم هذا العطر ؟	بقديش هاظا العطر؟
19814	corpus-6-test-corpus-26-train	ما الغرض منها ؟	شو الهدف منها؟
19819	corpus-6-test-corpus-26-train	أين يمكنني أداء الإجراءات الرسمية ؟	وين ممكن أساوي الإجراءات الرسمية؟
19838	corpus-6-test-corpus-26-dev	خمسون جنيهاً .	خمسين قنيه.
19840	corpus-6-test-corpus-26-test	أيشمل ذلك الضريبة ؟	هاظ بشمل الضريبة؟
19853	corpus-6-test-corpus-26-test	وما هي المثانة ؟	وشو هي المثانة ؟
19862	corpus-6-test-corpus-26-train	من فضلك استدع سيارة إسعاف .	من فظلك اطلب سيارة إسعاف.
19864	corpus-6-test-corpus-26-dev	سأراهن بثلاثة دولارات على هذا .	راح أراهن بثلاث دولرات على هاظا.
19871	corpus-6-test-corpus-26-train	كيف تسير الأمور ؟	كيف ماشية الأمور؟
19889	corpus-6-test-corpus-26-train	ليس ثمة طعام لا أحب أكله .	ما في أكل ما بحب أوكله.
19902	corpus-6-test-corpus-26-train	عيد الدستور أو " كيمبو كينينبي " عطلة قومية في الثالث من مايو للاحتفال بذكرى وضع الدستور الياباني الحالي .	عيد الدستور او "كيمبو كينينبي" هو عطلة وطنية بتاريخ ثلاثة خمسة للإحتفال بذكرى الدستور الياباني الحالي.
19912	corpus-6-test-corpus-26-train	هل تشمل هذه الرحلة زيارة لبرج سيرز ؟	بتشمل هاي الرحلة زيارة لبرج سيرز؟
19923	corpus-6-test-corpus-26-train	هل ثمة محل قريب لبيع الكتب ؟	في مكتبة بتبيع كتب قريبة؟
19928	corpus-6-test-corpus-26-train	سأحضر المدرسة الصيفية بجامعة هاواي .	رح أداوم بالمدرسة الصيفية بجامعة هاواي.
19935	corpus-6-test-corpus-26-train	ما هذا المكان الذي نمر به الآن ؟	شو هالمكان اللي بنمر فيه هسا؟
19945	corpus-6-test-corpus-26-train	اثنان كبار وطفل عمره ثلاث سنوات .	اثنين كبار و ولد عمره ثلاث سنين.
[truncated: 1 more rows]
