# Supplementary material for: Exploring prompting for dialectical machine translation: a focus on north Jordanian Arabic
Source: PeerJ journal article supplement (doi:10.7717/peerj-cs.3209), 2025-11-12
Supplement: Code.zip [file Madar_Corpus_26_dev.xlsx]

## Sheet: Sheet1
sentID.BTEC	split	MSA	IrbidDial	GPT	Translator	word 1	meaning 1	word 2	meaning 2	Foreign words	Has idioms	lang
18798	corpus-6-test-corpus-26-test	لدينا نبيذ أبيض ممتاز .	عندنا واين ابيض ممتاز .	عندنا نبيذ أبيض رائع.	Aram							MSA
3522	corpus-6-test-corpus-26-train	هل مطلوب منى دفع ثمن الغاز ؟	مطلوب مني أدفع حق الغاز؟	بدهم مني أدفع سعر الغاز؟	Aram	ثمن	حق
13748	corpus-6-test-corpus-26-test	أريد فندقاً ارخص .	بدي فندق أرخص.	بدي فندق أرخص.	Aram	أريد	بدي					MSA
9367	corpus-6-test-corpus-26-train	أود أن أشتري بعض التذكارات . هل يوجد هنا محل مناسب ؟	أني حاب أشتري شوية هدايا تذكارية. في محل مناسب قريب من هون؟	بدي أشتري شوية تذكارات. في محل مناسب هون؟	Aram
13306	corpus-6-test-corpus-26-train	كم كان لطيفاً أن التقي بك .	كثير كان حلو إني اجتمع فيك.	كثير كان حلو القاك.	Aram	بك	فيك	كم	كثير			MSA
13134	corpus-6-test-corpus-26-train	احترس لأن الجو في الجبال شديد التقلب .	انتبه لأنه جو الجبال بيتغير بسرعة.	حذاري لأنه جو الجبال بيتغير بسرعة.	Aram	احترس	انتبه	تقلب	تغير			MSA
9710	corpus-6-test-corpus-26-test	اقفل الباب من الداخل وأنا خارج الغرفة .	سكر الباب من جوا وانا طالع من الغرفة.	سكر الباب من جوا وأنا برا الاوضة.	Aram
17399	corpus-6-test-corpus-26-train	هذا يبدو رائعاً . ما الثمن ؟	هاذ مبين بجنن. كم سعره ؟	هاي بتبدو حلوة. بكم سعرها؟	Aram	رائعاً	بجنن	ثمن	سعر			MSA
553	corpus-6-test-corpus-26-train	أريد بعض الجوارب الرجالي .	بدي شوية جرابات رجالي.	بدي شوية جوارب رجالي.	Aram	جوارب	جرابات
13657	corpus-6-test-corpus-26-train	لا أحسن الألمانية كثيراً .	ما بعرف ألماني كثير.	ما بعرف ألماني كتير.	Aram							MSA
471	corpus-6-test-corpus-26-dev	هذا الكارت , حسناً ؟	هاذ الكرت ، طيب؟	هاي الكارتة, صح؟	Aram	كارت	كرت
13347	corpus-6-test-corpus-26-train	حسنا ، تصور كيف ستطول فترة عمله لو سأل سؤالاً آخر لكل شخص . هيا بنا ، لنسرع ونحضر حقائبنا . علينا الذهاب إلى الجمارك للإعلان عن أغراضنا بعد ذلك .	طيب، تخيل كم رح يطول وقت شغله لو سأل كل واحد سؤال ثاني. يلا نروح، خلينا نسرع ونجيب شناتينا. لازم نروح على الجمارك عشان نعلن عن اغراضنا بعد هيك.	زين، تخيل كم رح يطول وقت شغله لو سأل كل واحد سؤال ثاني. يلا نروح، خلينا نسرع ونجيب حقايبنا. لازم نروح على الجمارك عشان نعلن عن أغراضنا بعد هيك.	Aram	هيا	يلا	آخر	ثاني			MSA
11600	corpus-6-test-corpus-26-train	هل من المأمون شرب الماء الذي هنا ؟	هل آمن نشرب الماء اللي هون؟	هل آمن نشرب الماء اللي هون؟	Aram							MSA
5913	corpus-6-test-corpus-26-train	أكلت كثيرا نوعا ما .	يعني كلت كثير .	اكلت كتير شوي.	Aram	نوعا ما	يعني
3789	corpus-6-test-corpus-26-train	هل لديك لوحة موضوع عليها الألوان ؟	عندك لوحة ملونة؟	عندك لوحة ملونة ؟	Aram
2736	corpus-6-test-corpus-26-dev	ربما ، ولكن ينبغي أن ندرس كلا على حدا .	ممكن، بس لازم ندرس كل واحد لحال.	يمكن، بس لازم ندرس كل واحد لحال.	Aram	ربما	ممكن	على حدا	لحال
7693	corpus-6-test-corpus-26-train	أنا متأكد أن لدى حجز .	أنا متأكد أنه إلي حجز.	أنا متأكد انو عندي حجز.	Aram	لدي	إلي
1213	corpus-6-test-corpus-26-train	أريد كعكة محلاة من فضلك .	بدي كوكيز لو سمحت.	بدي كيكة محلاة لو سمحت.	Aram					كعكة محلاة:كوكيز
16643	corpus-6-test-corpus-26-train	الدخول فرداً فردا ، ً من فضلكم .	الفوته واحد واحد ، من فظلكو.	ادخلوا واحد ورا الثاني ، من فضلكو.	Aram	فرد	واحد	الدخول	الفوته			MSA
18687	corpus-6-test-corpus-26-train	من فضلك أعطني دواء للبرد .	من فظلك عطيني دوا للرشح.	من فضلك عطيني دوا للزكام.	Aram	برد	رشح					MSA
6866	corpus-6-test-corpus-26-dev	هذا يأتي مع طبق السلطة واختيار بين البطاطس المشوية أو المحمرة .	هاذ بيجي معه صحن سلطة ويا بطاطا مشوية يا محمرة.	هاي بتجي مع صحن سلطة وبتختار بين البطاطا المشوية أو المحمصة.	Aram	طبق	صحن	بطاطس	بطاطا
16793	corpus-6-test-corpus-26-train	تذكرة نزول وركوب طائرة أخرى من فضلك .	تذكرة نزول وطلوع طيارة ثانية لو سمحت.	تذكرة نزول وركوب طيارة ثانية لو سمحت.	Aram	ركوب	طلوع	طائرة	طيارة			MSA
19769	corpus-6-test-corpus-26-test	هل يمكنني أن أستأجر مضارب راكيت ؟	ممكن استأجر مظارب راكيت؟	ممكن أجار مضرب راكيت؟	Aram	مضارب	مظارب					MSA
11282	corpus-6-test-corpus-26-train	هل تستطيع تجهيزه بحلول الخامسة من مساء الغد ؟	بتقدر تجهزو عالخمسة بعد بكرة؟	بتقدر تجهزو عالخمسة بعد بكرة؟	Aram							MSA
19346	corpus-6-test-corpus-26-train	هل تمانع في أن أترك حقائبي معك حتى الساعة الواحدة ؟	بتمانع لو أترك شناتيي عندك لحد الساعة وحدة؟	بتمانع لو سيبت حقايبي عندك لحد الساعة الواحدة؟	Aram	حتى	لحد					MSA
902	corpus-6-test-corpus-26-train	أتساءل عن هذه الرسوم الزائدة على فاتورتي .	أني مستغرب ليش كل هاي الرسوم الزيادة عفاتورتي.	بتسأل عن هالأجور الزايدة على الفاتورة تبعتي.	Aram	أتساءل	مستغرب	زائدة	زيادة
12240	corpus-6-test-corpus-26-train	فضلا ، ساعدني في العثور على حديقة الحيوان .	من فضلك، ساعدني اعثر على حديقة الحيوانات.	من فضلك، ساعدني اعثر على حديقة الحيوانات.	Aram							MSA
10037	corpus-6-test-corpus-26-train	أظن أنني مصاب بدوار الجو جواً .	بتوقع إنه عندي دوخة بسبب الطيارة.	بظن انه انا مصاب بدوخة من الطيارة.	Aram	دوار	دوخة
8164	corpus-6-test-corpus-26-train	لقد اشتريت هذه من لحظة ، ولكن هلاً بدلت هذه بتلك ؟	أنا اشتريت هاي من دقيقة، بس ممكن اتبدلي اياها بهاي؟	شريت هاي من وقت، بس أرجوك بدلها بتلك؟	Aram	تلك	هاي	بدلت	اتبدل
221	corpus-6-test-corpus-26-train	هل ستقوم بعمل الترتيبات مقدماً ؟	بدك تعمل الترتيبات قبل؟	راح تعمل الترتيبات من قبل؟	Aram	تقوم	تعمل	مقدماً	قبل
6466	corpus-6-test-corpus-26-train	أود أن أغير لغرفة تطل على المحيط . هل توجد أي رسوم إضافية ؟	بدي أبدل لغرفة مطلة على البحر. في أي رسوم ثانية؟	بدي أغير الغرفة لوحدة بتطل على البحر. في أي تكاليف زيادة؟	Aram	إضافية	ثانية	أغير	أبدل
9752	corpus-6-test-corpus-26-train	اجعلها برقية عاجلة ، من فضلك .	خليها رسالة عاجلة، لو سمحت.	سويها تلغراف طارئ، لو سمحت.	Aram	برثية	رسالة
5723	corpus-6-test-corpus-26-train	نعم , إنه هو . ولكن ستضطر إلى الدوران يسارا في إشارة المرور الثالثة وتستمر في ذلك الشارع حتى تصل إلى الطريق رقم ستة وستين .	نعم، هيو. بس رح تظطر ادور يسار من عند الاشارة الثالثة وتظلك بنفس الشارع لعند ما توصل طريق ستة وستين.	أيوة، هو هو. بس لازم تمشي يمين وقت ما توصل عند الإشارة الثالثة، وتضل تمشي بنفس الشارع لحتى توصل على الشارع رقم ٦٦.	Aram	تضطر	تظطر	تستمر	تظل
9384	corpus-6-test-corpus-26-train	إنه في الخارج الآن .	هو برا هسا.	هو برة حاليا.	Aram	خارج	برا
11264	corpus-6-test-corpus-26-test	السيد كوباياشي كان يبحث عنك .	الاستاذ كوباياشي كان عم يدور عليك.	الاستاذ كوباياشي كان عم يدور عليك.	Aram							MSA
4501	corpus-6-test-corpus-26-train	ما أروع زوجتك من طاهية .	قديش مرتك طباخة ممتازة.	إش قد ما زوجتك طباخة ممتازة.	Aram	طاهية	طباخة	زوجتك	مرتك
16271	corpus-6-test-corpus-26-train	هذا ضرب من الدناءة .	هاظا ضرب من الوساخة.	هاي نوع من الوساخة.	Aram	دناءة	وساخة					MSA
13322	corpus-6-test-corpus-26-train	إنه ممزق .	هو إمزع.	هو مخرب.	Aram	ممزق	إمزع					MSA
11240	corpus-6-test-corpus-26-train	هل لديكم أوشحة حريرية ؟ إنني أبحث عن هدية لزوجتي .	عندكم وشاح حرير؟ أنا بدور على هدية للزوجة.	عندكم وشاح حرير؟ أنا بدور على هدية للزوجة.	Aram							MSA
2557	corpus-6-test-corpus-26-train	واحد شيزبرجر لكي أذهب ، من فضلك .	واحد تشيز برقر عشان أروح، لو سمحت.	شيزبرجر واحد تاخذه معك، لو سمحت.	Aram	أذهب	أروح
1193	corpus-6-test-corpus-26-test	هل هناك فرقة موسيقية أم دي جي ؟	في فرقة موسيقية ولا ديجيه؟	في فرقة موسيقية هون ولا دي جي؟	Aram	دي جي	ديجيه
19413	corpus-6-test-corpus-26-train	هذا رائع . أين الخبز ؟	هاذ ممتاز . وين الخبز؟	هاي عظيمة . وين الخبز؟	Aram	رائع	ممتاز					MSA
2528	corpus-6-test-corpus-26-train	هل توجد مصارف بالقرب من المحطة ؟	في بنوك قريبة من المحطة؟	فيه بنوك جنب المحطة؟	Aram						مصرف:بنك
5914	corpus-6-test-corpus-26-train	هل يمكن أن أتحدث إلى السيدة براون ؟	ممكن أحكي مع الآنسة براون؟	ممكن أحكي مع السيدة براون؟	Aram	سيدة	آنسة	أتحدث	أحكي
15804	corpus-6-test-corpus-26-train	اكتب اسم شركة الطيران ورقم الرحلة أيضاً .	اكتب اسم شركة الطيران ورقم الرحلة برضه.	اكتب اسم شركة الطيران ورقم الرحلة كمان.	Aram	أيضاً	برضه					MSA
8456	corpus-6-test-corpus-26-train	كان معي جواز سفري وبطاقتي الائتمانية في جيبي .	كان معي جواز السفر والفيزا بجيبتي.	كان معي جوازي وكارت الأتمان بجيبي.	Aram	جيب	جيبة
5045	corpus-6-test-corpus-26-train	لا تزال تبدو عليهم علامات المرض وشحوبة الوجه .	بعده مبين عليهم علامات المرض و وجوهم شاحب.	هني لسات عليهم علامات المرض وبلاشت وجوهم.	Aram	تبدو	مبين	لا تزال	بعده
9160	corpus-6-test-corpus-26-train	ما تكلفة البريد الجوي إلى اليابان ؟	قديش تكلفة البريد الجوي لليابان؟	كم سعر البريد الجوي لليابان؟	Aram
631	corpus-6-test-corpus-26-train	إذا سأل أحد عني فأخبره بأني سوف أكون بالمقهى .	اذا حدا سأل عني، قله اني رح أكون بالكوفي شوب.	اذا حدا سأل عني خبرو اني رح كون بالكافيه.	Aram	أخبره	قله			مقهى: كوفي شوب
16259	corpus-6-test-corpus-26-train	لقد كسر الزمام المنزلق . هل لديك مزيد من نفس النوع ؟	انكسر السحاب اللي عندي. عندك زيادة من نفس النوع ؟	كسر الرحال اللي عندي. عندك زيادة من النوع هاد؟	Aram	مزيد	زيادة	زمام	سحاب			MSA
15464	corpus-6-test-corpus-26-test	تقع منافذ الخروج للطوارئ في مقدمة ووسط ومؤخرة هذه الطائرة .	الأبواب الطارئة بتكون قدام, وفالنص, وخلف الطيارة هاي.	الأبواب الطارئة بتكون قدام, وفالنص, وخلف الطيارة هاي.	Aram	أبواب	منافذ	مؤخرة	خلف			MSA
2505	corpus-6-test-corpus-26-train	الحافلة هناك .	الباص هناك .	الباص هنيك.	Aram	حافلة	باص
14737	corpus-6-test-corpus-26-train	هل هناك أي صناديق بريد قريبة من هنا ؟	فيه صناديق بريد قريبة من هون؟	فيه صناديق بريد قريبة من هون؟	Aram	هناك	فيه					MSA
2100	corpus-6-test-corpus-26-test	خطف محفظتي وجرى بعيداً .	سرق جزداني وركظ بعيد.	شل حقيبتي وهرب لبعيد.	Aram	خطف	سرق	جرى	ركظ
9431	corpus-6-test-corpus-26-train	إليك إحداها يا سيدي .	هي واحده إلك يا أستاذ.	هاي وحدة منهم لعيونك يا معلم.	Aram	إحداها	وحدة
17526	corpus-6-test-corpus-26-train	لا , أعتقد أنهم نسوا أن يحضروا واحدة لنا .	لا, بظنهم نسيوا يجيبولنا وحدة.	لا, بظنهم ناسيين يجيبولنا وحدة.	Aram	نسوا	نسيوا					MSA
12878	corpus-6-test-corpus-26-train	هل يمكنك كتابة عنوانك في هذا المكان ؟	تقدر تكتب عنوانك هون؟	تقدر تكتب عنوانك هون؟	Aram							MSA
16976	corpus-6-test-corpus-26-train	أود أن أجعل أكمام هذا الجاكت الرياضي طويلة .	بدي اعمل اكمام هالجاكيت الرياضي طويلة.	بدي اعمل اكمام هالجاكيت الرياضي طويلة.	Aram	أجعل	أعمل					MSA
12254	corpus-6-test-corpus-26-train	أرني كيفية استعمال الهاتف .	وَرِّني كيف بدي استخدم التلفون.	وَرِّني كيف بدي استخدم التلفون.	Aram							MSA
3644	corpus-6-test-corpus-26-train	غسيلي لم يرجع حتى الآن .	غسيلي ما رجع لحد هسا.	ما رجعش غسيلي لهسا.	Aram	حتى	لحد
14952	corpus-6-test-corpus-26-train	هل يمكنني أن أطلع على شهادة التطعيم الخاصة بك , من فضلك ؟	بقدر أشوف شهادة التطعيم تاعيتك، إذا سمحت؟	ممكن أشوف شهادة التطعيم اللي عندك، من فضلك؟	Aram	أطلع	أشوف	الخاصة بك	تاعيتك			MSA
6923	corpus-6-test-corpus-26-test	هل يمكنك أن تقرضني حبل القطر ، من فضلك ؟	ممكن تعيرني حبل القطار، لو سمحت؟	ممكن تقرضني حبل الشحن، لو سمحت؟	Aram	تقرضني	تعيرني
16371	corpus-6-test-corpus-26-train	إلى أي ساعة متأخرة تظل مفتوحة ؟	لأي ساعة بتظل مفتوحة؟	لأي ساعة بتضل مفتوحة؟	Aram	إلى	ل					MSA
11343	corpus-6-test-corpus-26-train	كيف يمكنني أن أطفأ الضوء ؟	شو الطريقة عشان أطفي الدواية؟	شو الطريقة عشان أطفي الدواية؟	Aram							MSA
19840	corpus-6-test-corpus-26-test	أيشمل ذلك الضريبة ؟	هاظ بشمل الضريبة؟	هاي بتشمل الضريبة؟	Aram							MSA
18640	corpus-6-test-corpus-26-train	لمدة عشرة أيام .	لعشر إيام.	لعشرة أيام.	Aram	أيام	إيام					MSA
10191	corpus-6-test-corpus-26-dev	معذرة . أين المحطة هنا ؟	عفواً، وين المحطة اللي هون؟	معلش، وين المحطة هون؟	Aram	التي	اللي
15292	corpus-6-test-corpus-26-train	دلني على أكثر نوادي موسيقى الريجاي إثارة في نيويورك .	دلني على أحلى اندية موسيقى الريجاي في نيويورك.	دلني على أحلى نوادي موسيقى الريجاي في نيويورك.	Aram	نوادي	اندية					MSA
1056	corpus-6-test-corpus-26-dev	لدينا نحو ثلاثون نوعاً من زيوت الاستحمام .	عنا حوالي ثلاثين نوع من زيوت الحمام.	عنا حوالي تلاتين نوع من زيوت الاستحمام.	Aram	لدينا	عنا	استحمام	حمام
15073	corpus-6-test-corpus-26-test	كم الأجرة ؟ هل لك أن تدون الأجرة على قطعة ورق ؟	قديش الأجرة؟ ممكن تكتبها على شقفة ورقة؟	أديش الأجرة؟ ممكن تكتبلي الأجرة على قصة ورق؟	Aram	قطعة	شقفة	تدون	تكتب			MSA
14763	corpus-6-test-corpus-26-train	أنه يبلغ من العمر ثلاثون عاما .	هو عمره ثلاثين سنة.	هو عمرو تلاتين سنة.	Aram							MSA
3859	corpus-6-test-corpus-26-train	ما نوع الخبز لديكم ؟	شو نوع الخبز اللي عندكو؟	شو نوع الخبز عندكم؟	Aram	لديكم	عندكو
14304	corpus-6-test-corpus-26-train	ممكن أعرف اسمك من فضلك ؟	ممكن أعرف اسمك لو سمحت؟	ممكن أعرف اسمك لو سمحت؟	Aram							MSA
10997	corpus-6-test-corpus-26-train	أريد أن أعرج على برج لندن .	بدي أروح على برج لندن.	بدي أروح على برج لندن.	Aram							MSA
7811	corpus-6-test-corpus-26-train	لقد سرقت في شاطئ وايمانالو . من فضلك تعالى فوراً .	انسرقت على شط وايمانالو. لو سمحت تعال هسا.	سرقوني في شاطئ وايمانالو. لازم تيجي على طول.	Aram	فوراً	هسا	تعالى	تعال
3220	corpus-6-test-corpus-26-train	هل تود شرب شيئاً من الحانة ؟	بتحب تشرب إشي من البار؟	بدك تشرب اشي من البار؟	Aram	شيئاً	إشي			حانة: بار
16403	corpus-6-test-corpus-26-train	إنه غالي جدا بالنسبة لي . ألا يمكنك تخفيض السعر قليلاً ؟	هاذ غالي كثير علي. ما بتقدر تنزل السعر شوي؟	هاد غالي كثير علي. ما فيك تقلل السعر شوي؟	Aram	تخفض	تنزل	قليلاً	شوي			MSA
8141	corpus-6-test-corpus-26-train	ولكن عليك أن تعدني بركل الكرة ، وليس أنا . موافق ؟	بس بدي توعدني تشوط الطابة، مش أني. طيب؟	بس لازم تعدني انك انت رح تركل الكرة، مش انا. موافق؟	Aram	تعدني	توعدني	تركل	تشوط
3705	corpus-6-test-corpus-26-train	يا لها من كلاب ذكية . من أي فصيلة ؟	يا الله شو إنها كلاب ذكية . من أي فصيلة؟	شو هالكلاب الذكية. من أي نوع هي؟	Aram
18401	corpus-6-test-corpus-26-train	ساعتي . لقد كانت ساعة رقمية ماركة حديثة سويسرية الصنع .	ساعتي. كانت ساعة ديجيتال من ماركة سويسرية جديدة.	ساعتي. كانت ساعة رقمية من ماركة سويسرية جديدة.	Aram					رقمية : ديجيتال		MSA
612	corpus-6-test-corpus-26-train	حسناً ، أود أن أجرب النبيذ الأبيض .	طيب، انا بدي أجرب العرق .	ماشي، بدي جرب الخمرة البيضا.	Aram	نبيذ	عرق
8823	corpus-6-test-corpus-26-dev	اهبط هنا ، وانتقل إلى الحافلة رقم ستة .	إنزل هون، وروح على باص رقم ستة.	إنزل هون، وتحول للباص رقم ستة.	Aram	اهبط	إنزل	انتقل	روح
15037	corpus-6-test-corpus-26-train	أريد شهادة طبية وإيصال من أجل التأمين الخاص بي .	بدي شهادة طبية و وصل عشان التأمين تاعي.	بدي شهادة طبية وإيصال عشان التأمين تاعي.	Aram	إيصال	وصل	من أجل	عشان			MSA
15673	corpus-6-test-corpus-26-train	بهذا المقاس من فضلك .	بهالمقاس لو سمحت.	بهالمقاس لو سمحت.	Aram							MSA
16955	corpus-6-test-corpus-26-dev	إنها على بعد ناصية واحدة في الشارع .	هيه على بُعد ناصية وحدة بالشارع.	هيه على بُعد دور واحد بالشارع.	Aram	في	ب					MSA
14960	corpus-6-test-corpus-26-train	هل تسافر كثيرا ؟	بتسافر كثير؟	بتسافر كثير؟	Aram							MSA
18155	corpus-6-test-corpus-26-train	هل يمكنك ترتيب هذه البناطيل ؟	ممكن تصفط هالبناطيل؟	ممكن ترتبلي هالبناطيل؟	Aram	ترتب	تصفط					MSA
4742	corpus-6-test-corpus-26-dev	أريد مصباحاً .	بدي لمبة.	بدي كشاف.	Aram	مصباح	لمبة
2808	corpus-6-test-corpus-26-train	من فضلك أخبرني عن بعض الشوارع المناسبة للتسوق .	لو سمحت احكيلي عن شوية شوارع مليحة للتسوق.	من فضلك قللي عن شوارع ممتازة للتسوق.	Aram	مناسبة	مليحة
16653	corpus-6-test-corpus-26-dev	من أين يمكنني شراء مفارش مائدة ؟	من وين بقدر اشتري مفارش سفرة؟	من وين بقدر اشتري مناديل سفرة؟	Aram	مائدة	سفرة					MSA
15674	corpus-6-test-corpus-26-train	تمنح أوسمة الاستحقاق الثقافي للفنانين والعلماء المتميزين في هذا اليوم .	بعطوا وسام الاستحقاق الثقافي للفنانين والعلماء المتميزين اليوم.	بيعطوا وسام الاستحقاق الثقافي للفنانين والعلماء الكويسين اليوم.	Aram	تمنح	بعطوا					MSA
17394	corpus-6-test-corpus-26-train	لا يوجد لدينا نفس الطراز الآن . سأفحص مخزوننا . انتظر دقيقة من فضلك .	ما عنا نفس النوع حالياً. رح أشوف المخزن عنا. استنى دقيقة إذا سمحت.	ما عنا نفس الطراز حالياً. رح اتفحص المخزون عنا. استنالي دقيقة خاي.	Aram	أفحص	أشوف	مخزون	مخزن			MSA
2083	corpus-6-test-corpus-26-train	انظر التعليمات على علبة الطعام الفارغة .	شوف التعليمات اللي على علبة الأكل الفاضية.	شوف التعليمات على علبة الأكل الفاضية.	Aram	فارغة	فاضية	انظر	شوف
2983	corpus-6-test-corpus-26-test	إجمالي ميزانيتنا حوالي خمسين دولاراًً لثلاثة أشخاص .	ميزانيتنا كلها حوالي خمسين دولار لثلاث أشخاص.	إجمالي المصاري اللي معنا حوالي خمسين دولار لتلاتة أشخاص.	Aram	إجمالي	كلها
19009	corpus-6-test-corpus-26-train	أريد الاتصال هاتفياً باليابان .	بدي أتصل بالتيلفون على اليابان.	بدي أتصل بالتيلفون على اليابان.	Aram					هاتف : تلفون		MSA
18531	corpus-6-test-corpus-26-train	كيف يتم مقارنة هذا المنتج الجديد مع المنتجات الموجودة ؟	كيف بدنا نقارن هاذ المنتج الجديد مع المنتجات اللي عنا؟	كيف بنقدر نقارن هاد المنتج الجديد مع المنتجات اللي عنا؟	Aram							MSA
6635	corpus-6-test-corpus-26-train	أين المحطة ؟	وين المحطة؟	وين المحطة؟	Aram
12776	corpus-6-test-corpus-26-test	كم عدد المشروبات التي يغطيها السعر ؟	قديش الأشربة اللي السعر بيغطيها؟	قديش الأشربة اللي السعر بيغطيها؟	Aram							MSA
15206	corpus-6-test-corpus-26-train	هه . إنها لا تعمل ، أليس كذلك ؟ يمكنك الانتقال إلى مقعد شاغر إذا كنت تريد ذلك .	هه. ما بتشتغل، صح ؟ بتقدر تروح عكرسي فاضي اذا بدك .	هه. ما بتشتغل، صح ؟ بتقدر تروح على كرسي فاضي اذا بدك ياه.	Aram	شاغر	فاضي	تنتقل	تروح			MSA
19460	corpus-6-test-corpus-26-train	هل لديك ألوان أخرى لهذا التي شيرت ؟	عندك الوان ثانية لهاظا التيشيرت؟	عندك الوان تانية لهاد التي شيرت؟	Aram							MSA
9516	corpus-6-test-corpus-26-train	سأعود إلى اليابان الاثنين المقبل .	أنا راح أرجع على اليابان الإثنين الجاي.	رح أرجع على اليابان الإثنين الجاي.	Aram	المقبل	الجاي	أعود	أرجع
10318	corpus-6-test-corpus-26-dev	عندي شقيقتان .	عندي أختين.	عندي تنتين بنات.	Aram	شقيقة	أخت
4341	corpus-6-test-corpus-26-train	هل هذه هي حقائب الرحلة جال صفر واحد ؟	هي هاي شناتي الرحلة صفر واحد؟	هاي هي شناتي السفر للرحلة رقم صفر واحد ؟	Aram	حقائب	شناتي
14094	corpus-6-test-corpus-26-train	كم تبلغ تكلفة تذكرة ذهاب وعودة إلى أوكسفورد ؟	قدايش بتكلف تذكرة روحة رجعة لأوكسفورد؟	أدايش بتكلف تذكرة رايح جاي لأوكسفورد؟	Aram	ذهاب	روحة	إياب	رجعة			MSA
2440	corpus-6-test-corpus-26-train	سأرى ما إذا كان أي منها يناسبني .	راح أشوف اذا في اشي منهن بناسبني.	رح شوف اذا في واحد منهن يناسبني.	Aram	سوف	راح
9041	corpus-6-test-corpus-26-train	نعم , يوجد مشروب على الأقل .	اه، هون في شراب واحد على الأقل.	أيوه، في مشروب عالأقل.	Aram	مشروب	شراب
6339	corpus-6-test-corpus-26-train	من فضلك ابدأ العداد .	لو سمحت شغل العداد.	من فضلك اشغل العداد.	Aram	ابدأ	شغل
2591	corpus-6-test-corpus-26-train	أجري .	أركض.	سير.	Aram	أجري	أركض
6228	corpus-6-test-corpus-26-train	متى يغادر القطار التالي إلى بوسطن ؟	متى راح يتحرك القطار الجاي على بوسطن؟	ايمتى بيفلت القطار الجاي على بوسطن؟	Aram	التالي	الجاي	يغادر	يتحرك
5411	corpus-6-test-corpus-26-train	أتمنى ألا تكون متعبا جدا .	بتمنى ما تكون كثير تعبان.	بتمنى ما تكون كتير تعبان.	Aram	منعب	تعبان	ألا	ما
7972	corpus-6-test-corpus-26-train	هل تذهب هذه السيارة إلى إدنبرة ؟	هاي السيارة رايحة على إيدنبيره؟	هاي السيارة بتروح على إدنبرة؟	Aram	هذه	هاي
14483	corpus-6-test-corpus-26-train	من فضلك ضعه في كيس الغسيل و اتركه هناك .	لو سمحت، حطه بكيس الغسيل و خليه هنيك.	لو سمحت، حطه بكيس الغسيل و خليه هنيك.	Aram	اتركه	خليه	ضعه	حطه			MSA
10882	corpus-6-test-corpus-26-train	أي بطاقات ائتمانية تقبلون ؟	شو نوع الفيزا معكم يلي بتقبلوها؟	شو نوع الفيزا معكم يلي بتقبلوها؟	Aram							MSA
18003	corpus-6-test-corpus-26-train	أود أن أتناول فراخ مشوية .	بدي اوكل جاج مشوي.	بدي آكل دجاج مشوي.	Aram	فراخ	جاج					MSA
7834	corpus-6-test-corpus-26-train	لقد دعمت الحكومة تنمية الصناعات .	الحكومة بتدعم الصناعات.	الحكومة ساندت تطور الصناعات.	Aram
3858	corpus-6-test-corpus-26-dev	أريد خريطة لسان فرانسيسكو والمنطقة المحيطة .	بدي خريطة لسان فرانسيسكو والمنطقة اللي حويلاها.	بدي خريطة لسان فرانسيسكو والمنطقة اللي حواليها.	Aram	محيطة	حويلاها
11450	corpus-6-test-corpus-26-train	أريدك تنزعه .	بديك تشيله.	بديك تشيله.	Aram							MSA
10102	corpus-6-test-corpus-26-train	يذهب عدد كبير من الناس إلى الشاطئ خلال الموسم .	عدد كبير من الناس بروحوا على الشط خلال الموسم.	بيروح كتار من الناس على البحر موسم الصيف.	Aram
3512	corpus-6-test-corpus-26-test	أريد مكان ما صغير .	بدي أي مكان صغير.	بدي مكان صغير شوي.	Aram	ما	أي
16231	corpus-6-test-corpus-26-train	كم المدة التي يستغرقه لكي يصل لليابان عن طريق البريد الجوي ؟	قديش بده وقت لحتى يوصل لليابان عن طريق البريد الجوي؟	أديش بده يوخد وقت لحتى يوصل لليابان عن طريق البريد الجوي؟	Aram	يستغرق	بده	مدة	وقت			MSA
18441	corpus-6-test-corpus-26-train	هل يمكن أن آخذ الأطباق الخاصة بك ؟	ممكن آخذ صحونك؟	ممكن أخذ صحونك؟	Aram	أطباقك	صحون					MSA
10830	corpus-6-test-corpus-26-train	أين قسم غير المدخنين ؟	وين القسم اللي الناس ما بتتدخن فيه؟	وين القسم اللي الناس ما بتتدخن فيه؟	Aram							MSA
11478	corpus-6-test-corpus-26-train	ألا يوجد طعام متبل وليس حارا جدا ؟	ما في أكل متبل ومش حار كتير؟	ما في أكل متبل ومش حار كتير؟	Aram							MSA
4894	corpus-6-test-corpus-26-train	حسناً . أريد سلطانية من الحجم المتوسط ، وكرات الأرز .	طيب. بدي سلطانية حجم وسط وكرات الرز.	ماشي. بدي صحن سلطة حجمه متوسط، وكور الأرز.	Aram	متوسط	وسط	أرز	رز
3961	corpus-6-test-corpus-26-train	هل يوجد مطعم تايلاندي قريب من هنا ؟	في مطعم تايلندي قريب من هون؟	في مطعم تايلاندي قريب من هون؟	Aram	يوجد	في
15575	corpus-6-test-corpus-26-train	ما هو الآيس كريم الذي تزكيه ؟	شو الأيس كريم اللي بتنصح فيه؟	شو الأيس كريم اللي بتنصح فيه؟	Aram	تزكي	تنصح					MSA
4644	corpus-6-test-corpus-26-test	هل هناك جولة بعد الظهر ؟	في لفة بعد الظهر؟	فيه دورة بعد الظهر؟	Aram	جولة	لفة
9100	corpus-6-test-corpus-26-train	إنها لا تفهم الإنجليزية مطلقا .	هي ما بتفهم إنجليزي بالمرة.	هي ما بتفهم الإنجليزي أبدا.	Aram	مطلقا	بالمرة	لا	ما
12420	corpus-6-test-corpus-26-train	هذا الشاي العشبي يساعد الجسم على استعادة نشاطه .	هاي الشاي العشبي بتساعد الجسم يرجع نشاطه.	هاي الشاي العشبي بتساعد الجسم يرجع نشاطه.	Aram							MSA
3685	corpus-6-test-corpus-26-train	هل يمكنك وضع عدسات نظر في هذا النظارة الشمسية ؟	ممكن تركبلي عدسات طبية على هاي النظارة الشمسية؟	ممكن تحط عدسات نظر في هالنضارة الشمسية؟	Aram	تضع	تركب
19085	corpus-6-test-corpus-26-train	هل يمكنك توضيح كيفية عمل ذلك ؟	ممكن تشرحلي كيف بشتغل هاذ؟	ممكن تشرحلي كيف بتعمل هيك؟	Aram	ذلك	هاذ	توضح	تشرح			MSA
18919	corpus-6-test-corpus-26-train	لقد فهمت ما أردت أنت بالضبط . هل لي أن اقترح ذلك ؟	فهمت شو بدك بالضبط. ممكن اقترح هيك؟	فهمت شو بدك بالضبط. ممكن اقترح هيك؟	Aram	ذلك	هيك					MSA
7671	corpus-6-test-corpus-26-train	خذني إلى طريق أباي , من فضلك .	وديني على شارع أباي، لو سمحت.	وديني على طريق بابا, لو سمحت.	Aram	خذني	وديني
5262	corpus-6-test-corpus-26-train	هل يمكنك أن تحضر هنا قريباً بقدر المستطاع ، من فضلك ؟	بتقدر تيجي هون بأسرع وقت، لو سمحت؟	ممكن تيجي هون قريب كثر ما تقدر، لو سمحت؟	Aram	يمكنك	بتقدر	تحضر	تيجي
8234	corpus-6-test-corpus-26-train	أية حافلة تذهب إلى ميامي ؟	أي باص بروح على ميامي؟	أي باص رايح على ميامي؟	Aram
12708	corpus-6-test-corpus-26-train	في الساعة السابعة ، من فضلك .	بالساعة السابعة ، لو سمحت.	بالساعة السابعة ، لو سمحت.	Aram							MSA
19754	corpus-6-test-corpus-26-train	شكراً على إدلائك بأفكارك الفريدة معنا .	مشكور على ما وضعتلنا ياه من أفكارك الخاصة.	مشكور على ما وضعتلنا ياه من أفكارك الخاصة.	Aram							MSA
19196	corpus-6-test-corpus-26-train	ألديك مقاس أوسع ؟	عندك حجم أوسع ؟	عندك مقاس أكبر ؟	Aram	مقاس	حجم					MSA
17030	corpus-6-test-corpus-26-dev	توقفت القطارات بسبب الإضراب .	وقفت القطارات عشان الإضراب.	وقفت القطارات عشان الإضراب.	Aram	بسبب	عشان					MSA
15564	corpus-6-test-corpus-26-train	حجرة مزدوجة بحمام من فضلك .	غرفة مزوجة مع حمام لو سمحت.	غرفة ثنائية مع حمام لو سمحت.	Aram	مزدوجة	مزوجة	حجرة	غرفة			MSA
13515	corpus-6-test-corpus-26-train	هل هناك عرض ترفيهي ليلي ؟	في عرض ترفيهي بالليل؟	في عرض تسلية بالليل؟	Aram							MSA
3041	corpus-6-test-corpus-26-test	رقم مقعدك هو اثنان وثلاثون أ . بعد ذلك سر في خط مستقيم في هذه الطرقة . إنه المقعد المجاور للنافذة .	رقم مقعدك اثنين وثلاتين أ. بعدين، امشي دغري لاخر هاد الممر. المقعد اللي عندالشباك.	رقم مقعدك هو اتنين وتلاتين أ. بعدها امشي دوغري بهالطريق. هاي الكرسي جنب الشباك.	Aram	سر	امشي	طريق مستقيم	دغري
16799	corpus-6-test-corpus-26-train	أريد حقيبة كيلي حمراء نفس هذا الطراز .	بدي شنتة كيلي حمرا مثل هاذ الموديل.	بدي شنطة كيلي حمرا مثل هاي الموديل.	Aram	حمراء	حمرا	نفس	مثل	طراز : موديل		MSA
8844	corpus-6-test-corpus-26-test	كم يكلف عش الغراب الطازج ؟	كم سعر الفطر الطازا؟	أديش بكلف عش الغراب الطري؟	Aram	الطازج	طازا	عش الغراب	فطر
15791	corpus-6-test-corpus-26-train	أنا مستعد للطلب .	أنا جاهز للطلب.	أنا جاهز للطلب.	Aram	مستعد	جاهز					MSA
5263	corpus-6-test-corpus-26-train	قدحاً من القهوة , من فضلك .	فنجان قهوة، لو سمحت.	كوب قهوة, لو سمحت.	Aram	قدح	فنجان
6660	corpus-6-test-corpus-26-dev	أعبر الجسر من هناك ، وستجد المكتبة على يدك اليسرى .	اقطع الجسر لهناك، وراح تلاقي المكتبة على ايدك الشمال.	عبور الجسر من هونيك، ورح تلاقي المكتبة على اليسار.	Aram	أعبر	اقطع	يسرى	شمال
13027	corpus-6-test-corpus-26-train	هل سنقفز من هنا ؟	رح إنط من هون؟	رح نقز من هون؟	Aram	نقفز	إنط					MSA
2381	corpus-6-test-corpus-26-train	أريد كوباً من الخمر الأحمر .	بدي كاسة واين إحمر.	بدي كاس من النبيذ الأحمر.	Aram	أحمر	إحمر	كوب	كاسة	خمر: واين
1163	corpus-6-test-corpus-26-dev	هل لى أن أتلقى اتصالاً يوقظنى فى الخامسة و النصف من صباح الغد ؟	ممكن ترنلي مكالمة تصحيني فيها الساعة خمسة ونص بكرا الصبح؟	ممكن أستلم مكالمة تصحيني الساعة خمسة ونص بكرة الصبح؟	Aram	غد	بكرا	صباح	الصبح
16992	corpus-6-test-corpus-26-train	لدي حجز . هذا هو رقم تأكيد الحجز .	عندي حجز. هاظ هو رقم تأكيد الحجز.	عندي حجز. هاي هيه رقم تأكيد الحجز.	Aram							MSA
9862	corpus-6-test-corpus-26-train	الطريق إلى النجاح هو " جينمياكو " حقاً ؟	الطريق للنجاح ل " جينمياكو"، صح؟	طريق النجاح هو "جينمياكو" بالفعل؟	Aram	حقاً	صح
6285	corpus-6-test-corpus-26-train	هل أجرة الفندق تضم الإفطار ؟	أجار الفندق شاملة الفطور؟	بتشمل أجرة الفندق الفطور ؟	Aram	تضم	شاملة	أجرة	أجار
12193	corpus-6-test-corpus-26-train	طوكيو صفر ثلاثة أربعة مرات تسعة أربعة خمسة ستة سبعة .	طوكيو صفر تلاتة أربعة مرات تسعة أربعة خمسة ستة سبعة.	طوكيو صفر تلاتة أربعة مرات تسعة أربعة خمسة ستة سبعة.	Aram							MSA
3073	corpus-6-test-corpus-26-train	لحظة من فضلك .	لحظة لو سمحت.	لحظة تكرم.	Aram	لحضة	لحظة
1321	corpus-6-test-corpus-26-train	يمكننا ان نحجز لك غرفة مريحة في قلعة قديمة بالقرب من نادي جولف شهير .	بنقدر نحجزلك غرفة مريحة بقلعة قديمة قريبة من نادي جولف مشهور.	ممكن نحجزلك غرفة مريحة بقلعة قديمة قريبة على نادي غولف مشهور.	Aram	شهير	مشهور
5540	corpus-6-test-corpus-26-train	آسف ، لا يمكنني متابعتك . هل من الممكن أن تتحدث ببطء أكثر من فضلك .	عفواً، مش قادر أتبع معك. ممكن تحكي ابطأ شوي، لو سمحت؟	معذرة، ما أقدر أفهمك. بتقدر تحكي ببطء أكتر ممشكور؟	Aram	تتحدث	تحكي
16833	corpus-6-test-corpus-26-train	هل يجب أن آتي إلى المستشفى كل يوم ؟	لازم آجي على المستشفى كل يوم؟	بدي أيجي على المستشفى كل يوم؟	Aram							MSA
5906	corpus-6-test-corpus-26-train	أريد أن أعيد التأكيد على رحلتي إلى شيكاغو في السابع عشر .	بدي أرجع اأكد على رحلتي الطيران لشيكاغو في سبعطعش الشهر.	بدي أعيد التأكيد على رحلتي لـ شيكاغو يوم السابع عشر.	Aram	أعيد	أرجع	سابع عشر	سبعطعش
16576	corpus-6-test-corpus-26-train	هل هي متينة ؟	هي قوية؟	هي قوية؟	Aram	متينة	قوية					MSA
6835	corpus-6-test-corpus-26-train	تبدو بصحة جيدة .	شكلك منيح.	بتبين بحالة زينة.	Aram	تبدو	شكلك
8551	corpus-6-test-corpus-26-train	كم تكلف الملاءة الواحدة ؟	كم حق العباية الوحدة؟	أديش بتكلف الملاية الوحدة؟	Aram	ملاءة	عباية
1038	corpus-6-test-corpus-26-train	أنا مصور حر .	أني مصور حر.	أنا مصور حرّ.	Aram
12054	corpus-6-test-corpus-26-train	إن غطيطك مزعج .	غطيطك معصبني.	غطيطك معصبني.	Aram							MSA
19643	corpus-6-test-corpus-26-test	كلا ، من فضلك لا تفعل ذلك هلا ادخرت أسئلتك حتى نهاية حديثي ، لحين طلبها .	لا، لو سمحت لا تساوي هيك احتفظ بأسئلتك لبعد ما اخلص حكيي، لما اطلبهن منك.	لا، عاد لا تعملها، احتفظ بأسئلتك لبعد ما اخلص كلامي، لما اطلبهن منك.	Aram	حين	لما	ادخر	احتفظ			MSA
14854	corpus-6-test-corpus-26-dev	و أنا كذلك .	وأني هيك .	وأنا هيك كمان.	Aram							MSA
17381	corpus-6-test-corpus-26-dev	سنتقاسم .	رح نتقاسم.	رح نتقاسم.	Aram							MSA
12835	corpus-6-test-corpus-26-train	هل يمكننا أن نلقي نظرة على حافظات جلدية ؟	ممكن نتطلع على محافظ جلد؟	ممكن نتطلع على محافظ جلد؟	Aram							MSA
2086	corpus-6-test-corpus-26-train	أريد نقوداً ورقية .	بدي مصاري ورق.	بدي فلوس نقدية.	Aram	نقود	مصاري	ورقية	ورق
17803	corpus-6-test-corpus-26-train	هل يمكنني أن أحصل علي مزيد من الشاي ، من فضلك ؟	بقدر آخذ كمان شاي، لو سمحت؟	بتقدر تعطيني كمان شاي، لو سمحت؟	Aram	مزيد	كمان					MSA
11626	corpus-6-test-corpus-26-train	هلا بدلت هذا الفستان بآخر من مقاس أوسع ؟	ممكن تبدِّل هالفستان بواحد أكبر حجم؟	ممكن تبدِّل هالفستان بواحد أكبر حجم؟	Aram							MSA
6944	corpus-6-test-corpus-26-train	أي سيارة ذات أداء أفضل ؟	أي سيارة سواقتها احسن؟	أي سيارة بتعمل أحسن ؟	Aram	افضل	أحسن
19572	corpus-6-test-corpus-26-train	حسنا ، الأمر يتوقف على وسيلة المواصلات التي تأخذها . هل ستذهب بالحافلة أم الطائرة ؟	ماشي، الأمور بتعتمد على الطريقة اللي بتروح فيها. رايح بالباص ولا الطيارة؟	ماشي، الأمور بتعتمد على الطريقة اللي بتروح فيها. رايح تطير بالباص ولا الطيارة؟	Aram	طائرة	طيارة	وسيلة	طريقة			MSA
18572	corpus-6-test-corpus-26-train	أرغب في تأجير سيارة لمدة أسبوع .	حاب أستأجر سيارة لمدة أسبوع.	بدي أستأجر سيارة لمدة أسبوع.	Aram	أرغب	حاب					MSA
4185	corpus-6-test-corpus-26-train	كم المدة التي يستغرقها من هنا ؟	قديش بوخذ وقت من هون؟	ادايش بتاخده من هون؟	Aram	يستغرق	بوخذ	مدة	وقت
13660	corpus-6-test-corpus-26-train	لابد أن نجتمع ثانية بالتأكيد .	لازم نجتمع مرة ثانية أكيد.	لازم نتقابل تاني على بالزبط.	Aram	لابد	لازم					MSA
8095	corpus-6-test-corpus-26-train	أين الضاحية ؟	وين الضاحية؟	وين الحي؟	Aram
13854	corpus-6-test-corpus-26-train	لقد أصيب ببرد .	صار عنده رشح.	صار عنده برد.	Aram	برد	رشح	أصيب	صار			MSA
8966	corpus-6-test-corpus-26-dev	حسنا ، هذا يبدو واضحاً تماماً . كلاكما ، رجاءً ، أعطياني ما يخصكما من رُخص وشهادات تسجيل . وأنت يا بُني ، يؤسفني أننا مضطرون لأن نجري لك اختباراً لفحص نسبة الكحول .	طيب، هاد شكله واضح كثير، إنتو الثنين لو سمحتوا أعطوني رخصكو وتسجيلكو. وأنت يا إبني، اسف لازم نعملك فحص نسبة كحول.	ماشي، هذا بيبان جليل. كل واحد منكم، بدي منكم تعطوني الأوراق والشهادات اللي عندكم. وانت يا بني، بيزعجني اذا ضروري نعملك فحص لنسبة الكحول.	Aram	نجري	نعمل	أعطياني	أعطوني
16723	corpus-6-test-corpus-26-train	هل يمكنني الحصول على طابع فئة خمسة وتسعين سنتاً ؟	بتقدر تعطيني طابع بتسعة وتسعين سنتا؟	بتقدر تعطيني طابع تسعة وتسعين سنتا؟	Aram	يمكنك	بتقدر					MSA
13184	corpus-6-test-corpus-26-train	يمكن أن نتحدث حول هذا الموضوع في مقهى .	ممكن نحكي عن هالموضوع بالكافيه.	ممكن نحكي عن هالموضوع بالكافيه.	Aram	نتحدث	نحكي			مقهى: كافيه		MSA
8114	corpus-6-test-corpus-26-train	حسنا ، يا سيدي . في الحجم المتوسط نعرض عليك فرو السمور من نوع " ميركوري " ، فهل ذلك يوافقك ؟	تمام، سيدي. مقاس ميديوم منعطيك فرو السمور من ماركة " ميركوري " . بناسبك؟	تمام، يا استاذي. بالحجم الوسط عنا لك فرو السنور من نوع "ميركوري". بيعجبك هيك؟	Aram	يوافقك	بناسبك	حسنا	تمام	حجم متوسط: ميديوم
18382	corpus-6-test-corpus-26-train	أود إعادة التأكيد على حجز الرحلة .	بدي أكد مرة ثانية على حجز الرحلة.	بدي أكد مرة تانية على حجز الرحلة.	Aram							MSA
12510	corpus-6-test-corpus-26-train	هل يسعني أن استمر في حمل هاتين الحقيبتين ؟	بتسمحلي آكمل حامل هالشنتتين؟	بتسمحلي آكمل حامل هالشنتتين؟	Aram							MSA
8280	corpus-6-test-corpus-26-train	أودّ حجز موعد مع طبيب .	أنا بدي موعد عند الدكتور.	بدي احجز موعد مع دكتور.	Aram	طبيب	دكنور
7321	corpus-6-test-corpus-26-train	أين يمكنني شراء تذكرة للمترو ؟	من وين بقدر أشتري تذكرة للمترو؟	وين بقدر اشتري تذكرة المترو؟	Aram
19864	corpus-6-test-corpus-26-dev	سأراهن بثلاثة دولارات على هذا .	راح أراهن بثلاث دولرات على هاظا.	راح أراهن بتلاتة دولارات على هاد.	Aram	سوف	راح					MSA
16769	corpus-6-test-corpus-26-train	أنا متأكد أنني وضعتها في محفظة الأوراق الخاصة بي .	أنا متأكد إني حطيتها بمحفظة الوراق تاعيتي .	أنا متأكد إني حطيتها بمحفظتي للأوراق.	Aram	الخاصة بي	تاعيتي	وضعتها	حطيتها			MSA
12396	corpus-6-test-corpus-26-train	متى نصل إلى لوس أنجلوس ؟	إمتى بنوصل على لوس أنجلوس؟	إمتى بنوصل على لوس أنجلوس؟	Aram							MSA
12713	corpus-6-test-corpus-26-train	لمشاهدة المعالم .	لتشوف المناظر.	لتشوف المناظر.	Aram							MSA
6156	corpus-6-test-corpus-26-train	هو مشغول الآن .	هو مشغول هسا.	هسا هو مشغول.	Aram	الآن	هسا
2708	corpus-6-test-corpus-26-dev	تفضل الرقم .	تفظل الرقم.	خذ الرقم.	Aram	تفضل	تفظل
14198	corpus-6-test-corpus-26-train	لا تبدوا أكثر من إحدى وعشرون سنة من العمر .	ما بتبين أكثر من واحد وعشرين سنة عمرها.	ما بتبين أكتر من واحد وعشرين سنة عمر.	Aram	تبدو	بتبين					MSA
2353	corpus-6-test-corpus-26-dev	هل نسيت مشروباتنا ؟	نسيت عصيرنا؟	هل نسيتش عصايرنا؟	Aram	مشروباتنا	عصيرنا
408	corpus-6-test-corpus-26-train	معظم اليابانيين يأكلون الأخطبوط والحبار .	أغلب اليبانيين بوكلوا الخطبوط والحبار .	أغلب اليابانيين بياكلوا الأخطبوط والكالمار.	Aram	معظم	أغلب	يأكلون	بوكلوا
4635	corpus-6-test-corpus-26-train	بجوار حجرة الإيداع .	جنب غرفة الأمانات.	جنب غرفة الأمانة.	Aram	حجرة	غرفة
11462	corpus-6-test-corpus-26-train	أريد أن أعرف إذا كان يمكن شحن مجموعة الأطباق هذه إلى طوكيو .	بدي اعرف اذا بينفع اشحن هالطقم صحون لطوكيو.	بدي اعرف اذا بينفع اشحن هالطقم صحون لطوكيو.	Aram							MSA
8805	corpus-6-test-corpus-26-train	ما هي المحطة التالية ؟	شو هو الموقف الجاي؟	شو المحطة الجاية؟	Aram	التالي	الجاي	المحطة	الموقف
7104	corpus-6-test-corpus-26-dev	هذا هو مسئول الربط الخارجي .	هاظ هو مسؤول الربط الخارجي.	هاي هو مسؤول الاتصال الخارجي.	Aram
15610	corpus-6-test-corpus-26-dev	دخوله البلد مخالف للقانون . آسف . حسناً , إنني أخمن في كيفية العناية بكل شيء .	فوته على البلد مش قانونية. آسف. ماشي، انا بفكر كيف بدي أهتم بكل اشي.	عم يدخلو على البلد مش قانوني. آسف. ماشي، انا بتوقع كيف بدي أهتم بكل اشي.	Aram	دخوله	فوته	أخمن	بفكر			MSA
18917	corpus-6-test-corpus-26-train	زيت و خل فقط سيكون جيداَ .	زيت وخل بس رح يكون مليح.	زيت وخل بس رح يكون منيح.	Aram	جييد	مليح					MSA
5250	corpus-6-test-corpus-26-train	أوه ! موافق ، لقد فهمت ، سوف آتي إلى مكانك .	أووه، طيب. فهمت. راح آجي عندك.	أها! طيب ، فهمت ، رح جي عندك.	Aram	موافق	طيب
1702	corpus-6-test-corpus-26-train	هل أستطيع أن الحصول علي تذكرتان للمسرحية الغنائية الجمعة القادمة .	بقدر أوخذ تذكرتين للحفلة الموسيقية الجمعة الجاي؟	ممكن أحصل على تذكرتين للمسرحية الغنائية يوم الجمعة الجاي؟	Aram	مسرحية	حفلة
7412	corpus-6-test-corpus-26-train	الثلج يجعل الطريق زلق .	التلج بخلي الطريق يزحلق.	التلج بيخلي الشارع زلق.	Aram	زلق	يزحلق	يجعل	بخلي
4219	corpus-6-test-corpus-26-train	هل هناك قطار فائق السرعة في التاسعة والنصف ؟	في قطار سريع الساعة تسعة ونص؟	في قطار سريع كتير الساعة تسعة ونص؟	Aram	فائق السرعة	سريع	تاسعة	تسعة
2425	corpus-6-test-corpus-26-train	تحقيق شخصية . آه ، هل جواز السفر ينفع ؟	تحقيق شخصية. آه ، جواز السفر بنفع؟	بدي تعريف شخصية. آه, الباسبور بينفع؟	Aram
14933	corpus-6-test-corpus-26-train	إذا اشتريت هذا أيضا , فستعمل للمبلغ الذي يعفي من الرسوم .	لو اشتريت هاظ كمان, رح توصل للمبلغ اللي بيعفي من الرسوم.	لو اشتريت هاد كمان, رح يتحسب للمبلغ اللي بيعفي من الرسوم.	Aram	أيضا	كمان					MSA
13769	corpus-6-test-corpus-26-train	في عمل . لدي صلات عمل هناك .	في شغل. عندي واسطات شغل هناك.	بالشغل. عندي واسطات شغل هناك.	Aram	صلات	واسطات	عمل	شغل			MSA
11058	corpus-6-test-corpus-26-train	أود ذلك ، لكنني أخشى ألا أستطيع هذه المرة .	بدي هيك، بس خايف ما أقدر هالمرة.	بدي هيك، بس خايف ما أقدر هالمرة.	Aram							MSA
176	corpus-6-test-corpus-26-train	أنا بحالة جدية ، لكن هل تمانع في الاتصال بصديق ؟	أنا تمام، بس عندك مانع أرن عصاحبي؟	أنا في وضع صعب، بس ما تحتج لو أتصل بصاحبي؟	Aram	أتصل	أرن	بحالة جيدة	تمام
17799	corpus-6-test-corpus-26-train	هذه الغرفة صغيرة جداً .	هاي الغرفة صغيرة كثير.	هاي الغرفة صغيرة كتير.	Aram	جداً	كثير					MSA
548	corpus-6-test-corpus-26-train	هل تبحث عن شيء ما ؟	إنت بدّور على اشي؟	بتدور على اشي؟	Aram	تبحث	بدّور
2898	corpus-6-test-corpus-26-train	نزور أقاربنا كثيراً إلى حد ما .	إحنا منزور قرايبنا كثير كثير .	بنزور أهلنا كثير لحد ما.	Aram	أقاربنا	قرايبنا
1903	corpus-6-test-corpus-26-train	سوف أعطيك روشتة . خذها إلى الصيدلية .	راح أعطيك الوصفة . خظها عالصيدلية.	راح أديك وصفة. خذها للصيدلي.	Aram	خذها	خظها	روشيتة	الوصفة
7248	corpus-6-test-corpus-26-dev	هناك محطة غاز بعد مربعين سكنيين من هنا .	في محطة غاز على بعد حارتين من هون.	في محطة بتزيد بعد مربعين من هون.	Aram	مربع سكني	حارة
18341	corpus-6-test-corpus-26-train	هل تناولت دواء لتقلبات المعدة ؟	أخذت دوا للمعدة؟	طوّلت دوا للمعدة؟	Aram	تناولت	أخذت					MSA
11800	corpus-6-test-corpus-26-train	أريد إيداع مقتنياتي الثمينة في خزينة الفندق .	بدي أودي أغراضي الغالية في صندوق الفندق.	بدي أودي أغراضي الغالية في صندوق الفندق.	Aram							MSA
3557	corpus-6-test-corpus-26-train	لص . أمسكوا به .	حرامي. امسكوه .	حرامي . صيدوله .	Aram	لص	حرامي
4224	corpus-6-test-corpus-26-train	لم يكن خطئي .	ما كان غلطي.	ما كان غلطتي.	Aram	خطأ	غلط
12884	corpus-6-test-corpus-26-train	أخبرني من فضلك أين أقرب صيدلية .	قولي لي بتكرم أين أقرب صيدلية.	قولي لي بتكرم أين أقرب صيدلية.	Aram							MSA
9657	corpus-6-test-corpus-26-train	هل هذا صواب ؟ دعني أتحقق . أوه ، أسف بشدة آنسة تاكاناو . هذا خطأنا . إليك فاتورتك الجديدة . هلا تفضلت بالتوقيع هنا ، من فضلك ؟	هاد صح؟ خليني اتأكد. أووه، أنا جد آسف، انسة تاكاناو. هاد غلطنا. هون فاتورتك الجديدة. ممكن توقعي هون، لو سمحتي؟	مزبوط هاد؟ خليني أتأكد. هاي, معذرة كثير آنسة تاكاناو. هاد غلط منّا. هاي الفاتورة الجديدة. ممكن توقعي هون يرجى؟	Aram
1980	corpus-6-test-corpus-26-test	إلى هذا المكان , لو سمحت .	لهاظ المكان، لو سمحت.	لهالمكان, لو سمحت.	Aram	هذا	هاظ
5848	corpus-6-test-corpus-26-train	هذا الموديل متوفر بمقاسات ثمانية وعشرين , وواحد وثلاثين وخمسة وثلاثين سنتيمترا .	هاظ الموديل متوفر بمقاسات ثمنية وعشرين، و واحد و ثلاثين و خمسة و ثلاثين صانتي.	هالموديل متوفر بمقاسات ثمانية وعشرين, وواحد وثلاثين, وخمسة وثلاثين سنتمتر.	Aram	ثمانية	ثمنية
11751	corpus-6-test-corpus-26-train	اذهب إلى الناحية وانعطف يساراً عند إشارة المرور .	روح على السوية ولف شمال عند الاشارة.	روح على السوية ولف شمال عند الاشارة.	Aram							MSA
18338	corpus-6-test-corpus-26-dev	لقد دفعت من قبل خمسون دولارا كعربون حينما قمت بتسجيل إجراءات إقامتي بالفندق .	دفعت قبل هيك خمسين دولار عربون لما سجلت بياناتي بالفندق.	دفعت قبل هيك خمسين دولار عربون لما سجلت بياناتي بالفندق.	Aram							MSA
19467	corpus-6-test-corpus-26-train	من الأفضل لك أن تدخل مستشفانا .	أحسنلك تدخل مستشفانا.	أحسنلك تدخل مشفانا.	Aram							MSA
4364	corpus-6-test-corpus-26-test	رحلتنا للتخييم يجب أن تكون ممتعة .	رحلة التخييم تبعتنا لازم تكون مرتبة.	رحلتنا للتخيم لازم تكون ممتعة.	Aram	ممتعة	مرتبة
917	corpus-6-test-corpus-26-train	أنا سوف أدفع خمسون دولاراً .	أناي رح أدفع خمسين دولر.	أنا رح أدفع خمسين دولار.	Aram	أنا	أني	دولر	دولار
16746	corpus-6-test-corpus-26-train	أريد عطراً .	بدي عطر.	بدي عطر.	Aram							MSA
3972	corpus-6-test-corpus-26-train	إنها بجور ذلك المبنى المرتفع . لذلك ارجع في نفس الطريق الذي أتيت منه حتى إشارة المرور . ثم اتجه يساراً .	جنب العمارة الطويلة. لهيك ارجع مرة ثانية من نفس الطريق اللي اجيت منه لعند ما تلاقي الاشارة. وبعدها روح يسار.	هيه جنب هذاك البناية العالية. فلهيك ارجع على نفس الطريق اللي جيت منه لحدا الإشارة. وبعدين روح على اليسار.	Aram	اتجه	روح	مرتفع	طويل
19490	corpus-6-test-corpus-26-train	لقد سرق ذلك الرجل كيس نقودي .	هذاك الزلمة سرق صرة المصاري تاعتي.	هذاك الزلمة سرق جيبتي يا زلمة.	Aram	رجل	زلمة	نقود	مصاري			MSA
2205	corpus-6-test-corpus-26-train	هذا غال قليلاً ، ألا تعتقد ؟	هاذ غالي شوي، مش شايف هيك؟	هاد غالي شوي، مش تعتقد؟	Aram	قليلاً	شوي	تعتقد	شايف
16839	corpus-6-test-corpus-26-train	كم أجرة البريد لإرسال هذا الخطاب إلى اليابان ؟	قديش بده البريد مصاري عشان أرسل هالرسالة لليابان؟	أديش بدها البريد عشان أرسل هالرسالة لليابان؟	Aram	خطاب	رسالة					MSA
15149	corpus-6-test-corpus-26-train	من هذا ؟	مين هاظا؟	مين هاد؟	Aram	من	مين					MSA
17947	corpus-6-test-corpus-26-test	ستقف الليموزين عند البوابة الشمالية أولاً .	الليموزين رح توقف عند البوابة الشمالية أول شي.	الليموزين رح توقف عند البوابة الشمالية أول شي.	Aram							MSA
3392	corpus-6-test-corpus-26-train	كم السعر لنصف يوم ؟	قديش التكلفة لنص يوم؟	أديش الأجرة لنص يوم؟	Aram	كم	قديش
10736	corpus-6-test-corpus-26-dev	أريد سترة رياضية .	بدي جاكيت رياضي.	بدي جاكيت رياضي.	Aram							MSA
9150	corpus-6-test-corpus-26-train	هل يمكن أن تعتني بها من الساعة التاسعة صباحا حتى الثالثة ؟	ممكن ادير بالك عليها من الساعة تسعة الصبح للساعة ثلاثة؟	ممكن تعتني فيها من الساعة التاسعة الصبح لغاية الثالثة؟	Aram	حتى	ل
13919	corpus-6-test-corpus-26-train	أوه يا عزيزي . لم أدرك أنني لازلت لدي هذه الأشياء .	يا حبيبي، ما كنت أدري إنه بعده عندي هاي الأشياء.	يا حبيبي، ما كنت أدري إنه لساتني عندي هاي الأشياء.	Aram	أدرك	أدري	عزيزي	حبيبي			MSA
5518	corpus-6-test-corpus-26-train	الفاتورة من فضلك ؟	الفاتورة لو سمحت.	الحساب, لو سمحت؟	Aram
7663	corpus-6-test-corpus-26-train	أريد جاكيت لطفل في العاشرة من العمر .	بدي جاكيت لولد عمره عشر سنين.	بدي جاكيت لصغير عمرو عشر سنين.	Aram	طفل	ولد
15539	corpus-6-test-corpus-26-train	أجل ، معي تذكرتان ل " العمالقة " و " المحتالين " .	أيوة ، معي تذكرتين لـ "العمالقة" و "المحتالين".	أيوة ، عندي تذكرتين لـ "العمالقة" و "المحتالين".	Aram	أجل	أيوه					MSA
5361	corpus-6-test-corpus-26-train	صباح الخير . هل استرحت في نومك ؟	صباح الخير. ارتحت بنومتك ؟	صباح النشاط. نمت كويس؟	Aram	استرحت	ارتحت
9372	corpus-6-test-corpus-26-train	إلى متى تظل مفتوحة ؟	لأي ساعة بتظل فاتحة؟	لإمتى رح تضل مفتوحة ؟	Aram	مفتوحة	فاتحة
14292	corpus-6-test-corpus-26-train	آه ، ها هي . هل ينبغي على كل شخص أن يملأ استمارة الإقرار الجمركي هذه ؟	آه، هيها . كل واحد لازم يعبي هاي الاستمارة للجمرك؟	يا زلمة، هيها هون. كل واحد لازم يعبي هالاستمارة للجمرك؟	Aram	يملأ	يعبي					MSA
1100	corpus-6-test-corpus-26-train	أريد بعض الحفاضات التى يمكن التخلص منها بعد الاستعمال .	بدي حفاظات للاستعمال مرة وحدة.	بدي شوية حفاضات اللي بتقدر ترميها بعد ما تستعملها.	Aram	حفاضات	حفاظات
8516	corpus-6-test-corpus-26-train	إنه يقوم دائماً بالتسوق في شارع " بوند " .	هو دايماً بتسوق من شارع بوند.	هو دايما بيتسوق في شارع "بوند".	Aram	دائماً	دايماً
19479	corpus-6-test-corpus-26-train	كم محطة قبل التحويل ؟	كم محطة قبل الدوار؟	أديش محطة قبل المنعطف؟	Aram	تحويل	دوار					MSA
8291	corpus-6-test-corpus-26-dev	تُرى هل ثمة مائدة متاحة بالقرب من النافذة لسبعة أشخاص الليلة .	يا ترى في طاولة فاضية أحجزها قريبة من الشباك لسبع اشخاص المسا.	شوف، فيه سفرة فاضية قرب الشباك لسبعة أشخاص الليلة؟	Aram	تُرى	يا ترى
13488	corpus-6-test-corpus-26-train	ما الذي كان يحدث منذ الفترة الأخيرة ؟	شو اللي كان صاير من زمان؟	شو اللي كان صاير من زمان؟	Aram	يحدث	صاير					MSA
10440	corpus-6-test-corpus-26-train	من فضلك الغي رقم بطاقتي .	من فضلك إلغي رقم البطاقة حقي.	من فضلك إلغي رقم البطاقة حقي.	Aram							MSA
3040	corpus-6-test-corpus-26-train	أيهما أكثر أهمية للشعب الياباني , عيد رأس السنة أم عيد الكريسماس ؟	شو هو الأهم للشعب الياباني ، ليلة راس السنة ولا عيد الكريسماس؟	أيوا أهم عند اليابانيين, رأس السنة ولا عيد الكريسماس؟	Aram	رأس	راس	ولا	أم
11438	corpus-6-test-corpus-26-dev	سأقيم مع صديق .	رح اسكن مع صاحبي.	رح اسكن مع صاحبي.	Aram							MSA
4744	corpus-6-test-corpus-26-train	في نهاية الممر .	بنهاية الممر.	بآخر الحارة.	Aram	في	ب
14502	corpus-6-test-corpus-26-train	النافذة جيدة	الشباك كويس	الشباك منيح	Aram	نافذة	شباك					MSA
11190	corpus-6-test-corpus-26-train	تعداد سكان اليابان حوالي مائة وعشرينا مليونا .	عدد الناس اللي في اليابان حوالي مية وعشرين مليون.	عدد الناس اللي في اليابان حوالي مية وعشرين مليون.	Aram							MSA
5706	corpus-6-test-corpus-26-train	هل هذا الطعام منخفض السعرات الحرارية ؟	هاذ الأكل قليل الكالوريز؟	هاد الأكل قليل السعرات الحرارية؟	Aram	طعام	أكل	منخفض	قليل	سعرات حرارية: كالوريز
6287	corpus-6-test-corpus-26-train	هل هذا كل شيء ؟	هاظ كل اشي؟	هاي كل اشي؟	Aram	هذا	هاظ
19103	corpus-6-test-corpus-26-train	آسف فالآن لا يمكنك الطلب سوى من قائمة الطعام الليلية .	آسف، هسا ما بتقدر تطلب إلا من القائمة الليلية بس.	معذرة، هلا ولا يمكنك تطلب إلا من القائمة الليلية بس.	Aram	سوى	إلا					MSA
13090	corpus-6-test-corpus-26-dev	آسف جداً , ليس لدينا المزيد . ماذا عن الصحف الإنجليزية ؟	آسف كثير, ما عنا زيادة. شو رايك بالجرايد الإنجليزية؟	آسف كثير, ما عنا اكتر. شو عن الجرايد الإنجليزية؟	Aram	رأيك	رايك	المزيد	زيادة			MSA
679	corpus-6-test-corpus-26-test	آوه , الأمر بسيط ، هل أنت هنا ، على أية حال .	أووه، شغلة بسيطة. انت هون، على كل حال.	أها, الشغلة سهلة, انت هون؟ على كل حال.	Aram	أمر	شغلة	أي	كل
19251	corpus-6-test-corpus-26-train	يتوقف الأمر على درجة حرارة المكان . ولكن في وسط اليابان , في أوائل أبريل .	الأمر بتعتمد على حرارة المكان. بس بوسط اليابان, بأول نيسان.	الأمور بتعتمد على حرارة المكان. بس بوسط اليابان, بأول نيسان.	Aram	إبريل	نيسان	يتوقف	بعتمد			MSA
280	corpus-6-test-corpus-26-train	أريد الامتداد أربع وعشرون ، من فضلك .	حاب أمدد اربعة وعشرين، لو سمحت.	بدي التمديد اربعة وعشرين، لو سمحت.	Aram	أريد	حاب
15487	corpus-6-test-corpus-26-train	كيف تريد النقود ؟ من فضلك املأ هذه الورقة ووقع هنا .	شلون بدك المصاري؟ لو سمحت، عبي هالورقة ووقع هون.	شو بدك الفلوس؟ لو سمحت، املي هالورقة ووقع هون.	Aram	املأ	عبي	نقود	مصاري			MSA
10790	corpus-6-test-corpus-26-train	بالغان وطفلان ، من فضلك .	رجالين وضوجين، لو سمحت.	رجالين وضوجين، لو سمحت.	Aram							MSA
15763	corpus-6-test-corpus-26-train	هل يمكنني أن أحضر هذا على متن الطائرة ؟	بقدر أجيب هاذ معي عالطيارة؟	بقدر أجيب هاي معي عالطيارة؟	Aram	أحضر	أجيب					MSA
3502	corpus-6-test-corpus-26-train	من فضلك أحضر نبيذاً مناسباُ .	لو سمحت جيب واين مليح.	من فضلك جيب لي نبيذ مناسب.	Aram	مناسب	مليح	أحضر	جيب	نبيذ:واين
1620	corpus-6-test-corpus-26-train	لقط للتأكيد ، إعطني رقم المسئول .	بس للاحتياط، أعطيني رقم الشخص المسؤول.	لقط بدي تأكيد، اعطيني رقم الي مسؤول.	Aram	إعطني	أعطيني	فقط	بس
2003	corpus-6-test-corpus-26-train	أريد دورقاً صغيراً من الخمر الأبيض .	بدي دورقة صغيرة من العرق.	بدي طشة صغيرة من العرق الأبيض.	Aram	دورقاً	دورقة	خمر أبيض	عرق
10994	corpus-6-test-corpus-26-dev	هل يمكن أن تقول ذلك ثانية ؟	ممكن تعيد هاي ثاني؟	ممكن تعيد هاي ثاني؟	Aram							MSA
14059	corpus-6-test-corpus-26-test	عندنا جمبري بصلصة النيوبرج ورجل حمل مشوية .	عنا شريمب بصلصة النيوبرغ موزة خروف مشوية.	عنا قريدس بصلصة النيوبرغ ورجل خروف مشوي.	Aram	لحم الرجل	موزة	حمل	خروف	شريمب : جمبري		MSA
19675	corpus-6-test-corpus-26-train	أهلا . فرصة سعيدة .	مرحبا. فرصة طيبة.	مرحبا. فرصة طيبة.	Aram							MSA
4901	corpus-6-test-corpus-26-train	كيف يبدو هذا ؟	كيف شكله؟	شو رأيك بهاد؟	Aram	يبدو	شكله
16409	corpus-6-test-corpus-26-dev	أنا جاهز صباح الأربعاء أو بعد ظهر الجمعة .	أنا جاهز الأربعا الصبح أو بعد الظهر يوم الجمعة.	أنا مستعد صباح الأربعاء أو بعد الضهر يوم الجمعة.	Aram	صباح	صبح	أربعاء	أربعا			MSA
19666	corpus-6-test-corpus-26-train	أعتقد ذلك .	بظن هيك .	بظن هيك .	Aram	ذلك	هيك					MSA
19651	corpus-6-test-corpus-26-test	ليس به صعوبة أو غموض .	ما فيه صعوبة أو غموض.	ما فيه صعوبة أو غموض.	Aram							MSA
6227	corpus-6-test-corpus-26-train	هم أيضاً غاليين .	هذول كمان غاليين.	همه كمان غاليين.	Aram	هم	هذول	أيضاً	كمان
4358	corpus-6-test-corpus-26-train	تعالى ، من فضلك .	تعال، لو سمحت.	تعال، لو سمحت.	Aram
15095	corpus-6-test-corpus-26-train	لا تلمسني .	ما تلمسني.	ما تلمسني.	Aram							MSA
2179	corpus-6-test-corpus-26-train	يوجد صندوق للهاتف أمام هذا المصرف .	في كشك تليفون قدام هاذ البنك.	فيه تيليفون بوكس قدام هالبنك.	Aram	مصرف	بنك	صندوق	كشك	هاتف:تيلفون
19444	corpus-6-test-corpus-26-dev	أيهما أسرع : سيارة أجرة أم إسعاف ؟	أي وحدة أسرع: تكسي ولا سيارة الإسعاف؟	أي وحدة أسرع: تكسي ولا سيارة الإسعاف؟	Aram	أيهما	أي وحدة					MSA
14862	corpus-6-test-corpus-26-train	أود اللحاق بالسفر من سان دييجو .	بدي ألحق أسافر من سان دييجو.	بدي ألحق السفر من سان دييجو.	Aram							MSA
6481	corpus-6-test-corpus-26-train	العاشر من نوفمبر .	عشرة احدعش.	العاشر من نوفمبر.	Aram	احدعش	نوفمبر
14175	corpus-6-test-corpus-26-train	ليس من الأدب أن تسأل الناس كم يتقاضون .	مش من الأدب تسأل الناس قديش بوخذوا .	مش من الأدب تسأل الناس اديش بياخذوا.	Aram	ليس	مش	كم	قديش			MSA
13440	corpus-6-test-corpus-26-train	إنها البوابة السابعة .	هاي البوابة السابعة.	هاي البوابة السابعة.	Aram	إنها	هاي					MSA
503	corpus-6-test-corpus-26-train	أنه ذو مذاق غريب .	طعمه غريب.	هو طعمه غريب.	Aram	مذاقه	طعمه
2990	corpus-6-test-corpus-26-train	أن يمكنني أن أشتري لفة من الفيلم ؟	من وين بقدر أشتري شريط أو فلم تصوير؟	ممكن أشتري رولة فلم؟	Aram	لفة	شريط
17163	corpus-6-test-corpus-26-train	أريد أن يكون شعري خلف رأسي أطول قليلاً .	بدي شعري يكون طويل شوي ورا راسي.	بدي شعري يكون طويل شوي ورا راسي.	Aram	خلف	ورا	رأسي	راسي			MSA
643	corpus-6-test-corpus-26-train	هل ستدفع لي شركة الطيران لشراء بعض الاحتياجات الشخصية الأساسية ؟	رح تدفعلي شركة الطيران عشان أشتري شوية أشياء شخصية ضرورية؟	رح تعطيني شركة الطيران فلوس عشان أشتري بعض الحاجات الأساسية الخاصة في؟	Aram	أساسية	ضرورية	احتياجات	أشياء
1619	corpus-6-test-corpus-26-train	بالتأكيد . دعني أراها . أظن أن المرجان جرحك .	أكيد. خليني أشوفها . بظن المرجان جرحك.	أكيد . خليني شوفها . بعتقد إنو المرجان جرحك.	Aram	دعني	خليني	أراها	أشوفها
13159	corpus-6-test-corpus-26-train	هل يمكن استخدام شيكات سياحية وعملة ين ياباني ؟	بصير تستعمل شيكات سياحية وعملة ين ياباني؟	بتقدر تستعمل شيكات سياحية وعملة ين ياباني؟	Aram	يمكن	بصير					MSA
16127	corpus-6-test-corpus-26-train	حسناً . تفضل بالدخول .	ماشي. تعال فوت.	ماشي. تعال ادخل.	Aram	ادخل	فوت					MSA
14537	corpus-6-test-corpus-26-train	انه اللون الخاطئ .	هاظا اللون غلط.	هاي اللون غلط.	Aram	خاطئ	غلط					MSA
16292	corpus-6-test-corpus-26-test	هل لك أن تأخذني إلى كانتربري وتعيدني إلى هنا ؟	ممكن توديني على كانتربري وترجعني هون؟	ممكن تاخذني على كانتربري وترجعني هون؟	Aram	تعيدني	ترجعني	تأخذني	توديني			MSA
5987	corpus-6-test-corpus-26-train	هذا بالضبط ما كنت سأقوله .	هاظ بالزبط اللي كنت بدي أحكيه.	هاي بالظبط اللي كنت راح أحكيها.	Aram	بالضبط	بالزبط
3176	corpus-6-test-corpus-26-train	كم أجر الانتظار في الساعة ؟	كم تكلفة الصفة لكل ساعة؟	أديش أجر الانتظار بالساعة؟	Aram	أجر	تكلفة	الانتظار	الصفة
386	corpus-6-test-corpus-26-test	أنا على الطريق الرئيسي بجانب خليج موروا .	أني عالطريق العام بجنب خليج موروا.	أنا على الشارع الكبير جنب خليج موروا.	Aram	رئيسي	عام	أنا	أني
17272	corpus-6-test-corpus-26-train	أين يمكنني أن أقوم بإجراءات الدخول للخطوط الجوية اليابانية ؟	وين بقدر أعمل إجراءات الدخول للخطوط الجوية اليابانية ؟	وين بقدر أعمل إجراءات الدخول للطيارة اليابانية؟	Aram	أقوم	أعمل					MSA
18521	corpus-6-test-corpus-26-train	يمكنني القيام بها في وقتا ما الشهر القادم .	ممكن اعملها اي وقت بالشهر الجاي.	ممكن اعملها اي وقت بالشهر الجاي.	Aram	ما	أي	القادم	الجاي			MSA
4326	corpus-6-test-corpus-26-train	لقد انتقدتني ضمنا .	معنى حكيك إنك بتنقدني .	انت زمطتني على السكات.	Aram	ضمنا	معنى
5898	corpus-6-test-corpus-26-train	هل يمكن أن أستعمل هاتفك ؟	بصير استعمل تلفونك؟	ممكن استخدم تلفونك؟	Aram	يمكن	بصير			هاتف: تلفون
667	corpus-6-test-corpus-26-test	كان يفترض أن تسافر على الطائرة رقم ثمانية اثنان صفر التي أقلعت منذ خمس عشرة دقيقة . حسنا . بإمكاني تنظيم رحلة أخرى .	كان المفروض تسافر بالطيارة رقم ثمنية عشرين ، اللي طلعت من خمسطعشر دقيقة. على العموم. أني بقدر أرتبلك رحلة ثانية.	كان لازم تكوني مسافرة على الطيارة رقم ثمانيه اتنين صفر اللي طارت من فترة خمس عشرة دقيقة. طيب. بقدر أنظملك رحلة تانية.	Aram	طائرة	طيارة	أنظم	أرتب
19306	corpus-6-test-corpus-26-train	البطاقة الائتمانية ، من فضلك .	الفيزا , لو سمحت.	الكريدت كارد, لو سمحت.	Aram					بطاقة ائتمانية : فيزا		MSA
14459	corpus-6-test-corpus-26-train	سأتناول هذه الوجبة .	رح أوكل هاي الأكلة.	رح آكل هاي الأكلة.	Aram	أتناول	أوكل					MSA
8068	corpus-6-test-corpus-26-train	السيارة جاءت لي من الجانب عند التقاطع .	السيارة اجتلي من جهة التقاطع.	جتني العربية من الجنب عند الإشارة.	Aram	جاءت	اجت
19318	corpus-6-test-corpus-26-train	على الساحل الشرقي ، تجد أيضاً أماكن شهيرة . مثل نيويورك ، واشنطن ، دي دي وبوسطن .	على الساحل الشرقي، بتلاقي كمان أمكان معروفة. زي نيويورك, واشنطن, دي دي وبوسطن.	على الساحل الشرقي، بتلاقي ايضا مكان معروفة. زي نيويورك, واشنطن, دي دي وبوسطن.	Aram	شهيرة	معروفة	مثل	زي			MSA
12150	corpus-6-test-corpus-26-train	أريد مكالمة لإيقاظي في الثامنة والنصف صباح غد ، من فضلك .	بدي مكالمة تصحيني الثامنة ونص بالصبح بكرة ، بدي المعروف يا رجاء .	بدي مكالمة تصحيني الثامنة ونص بالصبح بكرة ، بدي المعروف يا رجاء .	Aram							MSA
13609	corpus-6-test-corpus-26-test	أتساءل عما يمكنني أن أحصل عليه منه ؟	بفكر شو بقدر استلم منو؟	بفكر شو بقدر استلم منو؟	Aram	اتساءل	بفكر					MSA
9702	corpus-6-test-corpus-26-train	الكعب عالي جدا بالنسبة لي .	هاد الكعب كثير عالي بالنسبة إلي.	الكعب طويل كثير بالنسبة الي.	Aram
238	corpus-6-test-corpus-26-train	تقدم إلىّ المساعدة ، شكراً لك .	بتساعدني ، شكراً الك.	ساعدني، مشكور سلفاً.	Aram
11374	corpus-6-test-corpus-26-train	أريد بعض الخيط .	بدي شوية خيط.	بدي شوية خيط.	Aram							MSA
16335	corpus-6-test-corpus-26-train	آسف ، نحن لا نبيع تذاكر للمسرح .	متأسفين، ما بنبيع تذاكر للمسرح.	متأسفين، ما بنبيع تذاكر للمسرح.	Aram	لا	ما					MSA
12761	corpus-6-test-corpus-26-train	أرجو أن تبعث هذا بالبريد الجوي إلى اليابان .	بتمنى تبعت هاد بالبريد الجوي لليابان.	بتمنى تبعت هاد بالبريد الجوي لليابان.	Aram							MSA
10107	corpus-6-test-corpus-26-train	وزني حوالي مائة وخمسين رطلاً .	وزني حوالي مية وخمسين كيلو.	وزني حوالي مية وخمسين باأرطل.	Aram	رطل	كيلو
11302	corpus-6-test-corpus-26-train	إنها تستغرق عشر دقائق سيراً على الأقدام .	بتخد عشر دقايق اذا مشيت على رجليك.	بتخد عشر دقايق اذا مشيت على رجليك.	Aram							MSA
5116	corpus-6-test-corpus-26-train	هل لك أن تقصّر الأكمام ؟	ممكن تقصر الكمام؟	بتقدر تقصر الكمام؟	Aram	الأكمام	الكمام
15607	corpus-6-test-corpus-26-test	أعطني سجائر .	أعطيني دخان.	عطيني سجاير.	Aram	أعطني	أعطيني					MSA
15798	corpus-6-test-corpus-26-dev	أملاح الحمام العشبي تجعل ملمس بشرتك ناعماً وأملس .	أملاح حمام الأعشاب بتخلي بشرتك ناعمة وملسه .	احمامات الأعشاب بتخلي بشرتك ناعمة وملسه .	Aram	أملس	ملسة	تجعل	بتخلي			MSA
18323	corpus-6-test-corpus-26-train	ما هي المحطة القادمة ؟	شو هي المحطة الجاية ؟	شو هي المحطة الجاية ؟	Aram	القادمة	الجاية					MSA
15902	corpus-6-test-corpus-26-train	آه . هذه الفضية نادرة " القمر والجرس " . هل تريد أن تغيرها أكيد ؟	اه . هاي القضية نادرة " القمر والجرس " . بدك تغيرها متأكد ؟	اه . هاي القرايدة نادرة " القمر والجرس " . بدك تغيرها متأكد ؟	Aram	هذه	هاي					MSA
375	corpus-6-test-corpus-26-train	أين محل الهدايا ؟	وين محل الهدايا؟	وين محل الهدايا؟	Aram
16904	corpus-6-test-corpus-26-train	مسار رقم أربعة عشر .	طريق رقم اربعطش.	طريق رقم اربعطاش.	Aram	أربعة عشر	اربعطعش					MSA
1653	corpus-6-test-corpus-26-test	من فضلك ادخل رقم هويتك الشخصية .	لو سمحت دخّل رقم هويتك .	من فضلك ادخل رقم الهوية تبعك.	Aram	ادخل	دخّل
3030	corpus-6-test-corpus-26-train	مرحباً بك .	يا مرحبا فيك.	أهلاً وسهلاً فيك.	Aram	بك	فيك
10243	corpus-6-test-corpus-26-test	دجاج ، من فضلك .	جاج، لو سمحت.	دياي، لو سمحت.	Aram	دجاج	جاج
5549	corpus-6-test-corpus-26-dev	ماذا يمكنني أن أريك ؟	شو بقدر أورجيك؟	شو ممكن أوريك؟	Aram	يمكنني	بقدر	أريك	أورجيك
19360	corpus-6-test-corpus-26-train	أجل . أخشى أني مضطر لذلك . ما مدى حفظ الأمن في هذه المنطقة ؟	أكيد. خايف أنو مجبور على هيك. قديش الأمان مطمن بالمنطقة هاي؟	أكيد. خايف أنو مجبر على هيك. قدايش الأمان مطمن بالمنطقة هاي؟	Aram	أخشى	خايف	مضطر	مجبور			MSA
6205	corpus-6-test-corpus-26-train	أين رسومات مونيت ؟	وين رسمات مونيت؟	وين رسومات مونيه؟	Aram	رسومات	رسمات
16344	corpus-6-test-corpus-26-dev	أريد مد إقامتي هنا ليومين آخرين .	بدي أمدد إقامتي هون يومين ثانيات.	بدي أطول هون بالإقامة يومين زيادة.	Aram	آخرين	ثانيات	مد	أمدد			MSA
7814	corpus-6-test-corpus-26-train	أريد هذا معبئاً .	بدي هاظا مليان.	بدي هاد مليان.	Aram	معبئ	مليان
4377	corpus-6-test-corpus-26-train	الجانب الأيسر من هذه الدور بجوار المصعد .	الجهة اليسار من هاذ الطابق جنب الاصنصير.	الجهة اليسارية من هاي الطابق جنب الأسانسير.	Aram	دور	طابق	الأيسر	اليسار
5902	corpus-6-test-corpus-26-test	رائحته جميلة . كم ثمنه ؟	ريحته حلوة. قديش سعره؟	ريحته حلوة. بكم سعرو ؟	Aram	ثمنه	سعره	رائحته	ريحتة
15331	corpus-6-test-corpus-26-dev	هاهي بطاقة تحقيق الهوية الخاصة بي .	هاي الهوية تبعتي.	هاي الهوية الخاصة فيني.	Aram	الخاصة بي	تبعتي					MSA
5259	corpus-6-test-corpus-26-train	لا ، هذا يكفي .	لا، هاذ بكفي.	لا، هاي تكفي.	Aram	يكفي	بكفي
3375	corpus-6-test-corpus-26-train	الأمانة هي السياسة المثلى .	الأمانة هي أحسن سياسة.	الأمانة هي السياية المثلي .	Aram	مثلى	أحسن
17475	corpus-6-test-corpus-26-train	إنها غالية الثمن . لا أستطيع شرائها .	هي غالية كثير . ما بقدر عمشتراها	هي غالية كتير. مش قادر اشتريها.	Aram	شرائها	مشتراها					MSA
3698	corpus-6-test-corpus-26-dev	سآخذ اثنين من هذه .	راح أوخد ثنتين من هاي.	رح آخد اتنين من هاي.	Aram	اثنتان	ثنتين
1867	corpus-6-test-corpus-26-train	أحتاج إلى تاكسي . أنا في ساوث ماين ، وليبرتي .	بدي تكسي. أني بساوث ماين ، وليبرتي.	بدي تاكسي. انا بساوث ماين، وليبرتي.	Aram	أحتاج	بدي
11576	corpus-6-test-corpus-26-train	لا أستطيع العثور على أمتعتك .	ما اقدر اعثر على اغراضك.	ما اقدر اعثر على اغراضك.	Aram							MSA
17673	corpus-6-test-corpus-26-train	أبحث عن شنطة بحزام متحرك .	بدور على شنتة فيها قشاط مش ثابت .	بدور على شنطة فيها حزام بيتحرك.	Aram	حزام	قشاط					MSA
14507	corpus-6-test-corpus-26-train	هل تم إدراج جميع تكاليف النقل ؟	كل تكاليف الشحن انحسبت ؟	هل كل تكاليف الشحن انحسبت ؟	Aram	إدراج	انحسبت					MSA
3001	corpus-6-test-corpus-26-test	أريد بذلة استحمام مقاس صغير , من فضلك .	بدي بدلة سباحة مقاسها صغير، لو سمحت.	بدي بدلة سباحة حجم صغير، لو سمحت.	Aram	بذلة	بدلة	استحمام	سباحة
19162	corpus-6-test-corpus-26-train	هل ثمة مستشفى قريب من هنا ؟	في مستشفى قريب من هون؟	في مستوصف قريب من هون؟	Aram	ثمة	في					MSA
8539	corpus-6-test-corpus-26-test	أودّ مراجعة ممتلكاتي الثمينة .	حاب أشيك على اشيائي الغالية.	بدي أراجع ممتلكاتي الغالية.	Aram	مراجعة	أشيك	ثمين	غالي
5410	corpus-6-test-corpus-26-test	وهو كذلك . هل فندق شيراتون قريب من هناك ؟	وهو هيك . فندق الشيراتون قريب من هناك؟	هيك هو. بيت الشيراتون بعيد من هون؟	Aram
16191	corpus-6-test-corpus-26-train	ربما ستظل ترتفع .	يمكن تظل تطلع.	يمكن تضل اتصعد.	Aram	ترتفع	تطلع					MSA
3489	corpus-6-test-corpus-26-train	خزينة الودائع , من فضلك .	صندوق الأمانات ، لو سمحت.	صندوق الودايع, لو سمحت.	Aram	ودائع	أمانات	خزينة	صندوق
19463	corpus-6-test-corpus-26-test	ينبغي ألا تشاهد التليفزيون طوال الوقت .	لازم ما تتفرج على التلفزيون طول الوقت.	لازم ما تتفرج على التلفزيون طول الوقت.	Aram	طوال	طول	نشاهد	نتفرج			MSA
15274	corpus-6-test-corpus-26-train	ما موعد عرض " قصة حب كوسي " ؟	متى وقت عرض "قصة حب كوسي"؟	إمتى وقت مسلسل "قصة حب كوسي"؟	Aram	موعد	وقت					MSA
10125	corpus-6-test-corpus-26-train	هل أحتاج لعلاج خاص ؟	انا بحاجة علاج خاص؟	بدي علاج خاص؟	Aram
1754	corpus-6-test-corpus-26-train	هل أستطيع تمديد إقامتي ؟	بقدر أمدد إقامتي؟	ممكن أطول إقامتي؟	Aram
4790	corpus-6-test-corpus-26-train	هل قلت إنك ستغادر إلى طوكيو غدا ؟	قلت إنك رايح على طوكيو بكرا؟	قلت إنك رايح على طوكيو بكرة؟	Aram	تغادر	رايح
14448	corpus-6-test-corpus-26-train	اسمي ساتو .	إسمي ساتو .	إسمي ساتو .	Aram							MSA
16279	corpus-6-test-corpus-26-dev	هل لك أن تعيد تأكيد رحلتي ؟ هاهي تذكرة الطيران .	ممكن تأكدلي الرحلة مرة تانية؟ هاي تذكرة الطيران.	ممكن تأكدلي الرحلة مرة تانية؟ هاي تذكرة الطيران.	Aram							MSA
1183	corpus-6-test-corpus-26-train	أريد بطارية .	بدي بطارية.	بدي بطارية.	Aram	أريد	بدي
6086	corpus-6-test-corpus-26-train	سأغادر باكراً غداً ، لذلك أود أن أدفع الآن .	بدي اطلع بكرا الصبح، عشان هيك حاب أدفع هسا.	بدي أطلع بكير بكرة، فبدي أدفع هسا.	Aram	لذلك	عشان
18103	corpus-6-test-corpus-26-train	لحظة فقط , من فضلك . سأوصلك بالسيد جونز .	لحظة بس، لو سمحت. راح أشبكك مع الأستاذ جونز.	لحظة بس، لو سمحت. راح اربطك مع الأستاذ جونز.	Aram	أوصلك	أشبكك					MSA
17593	corpus-6-test-corpus-26-train	أود أن آخذ هذا .	بدي آخذ هاظا.	بدي أخد هاد.	Aram	أود	بدي					MSA
14167	corpus-6-test-corpus-26-train	أكي ، هل تعرف محل تسجيلات قريب من هنا ؟	أكي، بتعرف محل تسجيلات قريب من هون؟	أهلين، بتعرف محل اسطوانات بالقرب من هون؟	Aram	بالقرب	قريب					MSA
12331	corpus-6-test-corpus-26-train	نحن مهتمون بالأزياء .	احنا بنهتم بالأزياء.	احنا بنهتم بالأزياء.	Aram							MSA
4813	corpus-6-test-corpus-26-train	كيف حال اللعب معك هذه الأيام ؟	كيف اللعب معك هاي الايام؟	كيف وضع اللعب معك هالأيام ؟	Aram	هذه	هاي
3285	corpus-6-test-corpus-26-train	الوقت يتأخر . يجب أن أرحل .	الوقت تأخر. لازم أروح.	الوقت بيتأخر. لازم اطلع.	Aram	أرحل	اروح
8143	corpus-6-test-corpus-26-train	إلى أي مسافة يبعد أكثر ؟	كم المسافة اللي ظلت ؟	كم بعيد أكثر؟	Aram	تبقى	ظل
1954	corpus-6-test-corpus-26-dev	هل يمكن أن أحجز سيارة للإيجار من هنا ؟	بقدر احجز سيارة للأجار هون؟	ممكن أحجز سيارة للكراء من هون؟	Aram	إيجار	أجار
6517	corpus-6-test-corpus-26-train	أشكرك من أعماق قلبي .	بشكرك من كل قلبي.	بشكرك من كل قلبي.	Aram					من أعماق قلبي : من كل قلبي
4674	corpus-6-test-corpus-26-train	أريد أن أرسل هذا إلى المغسلة . متى ستكون جاهزة ؟	بدي أودي هاذ للمغسلة. متى بكون جاهز؟	بدي ابعت هاي عالغسالة. إمتى رح تكون جاهزة؟	Aram	أرسل	أودي
17180	corpus-6-test-corpus-26-train	ما هو نوع النموذج الذي تفكر فيه ؟	شو نوع النموذج اللي بتفكر فيه؟	شو نوع النموذج اللي عم تفكر فيه؟	Aram	ما	شو					MSA
3207	corpus-6-test-corpus-26-train	حسناً ، سأرسلها لك إلى لاس فيجاس .	اوك، راح أبعثها إلك على لاس فيجاس.	ماشي، رح ابعتها الك على لاس فيجاس.	Aram	إلى	على	لك	إلك	حسنا:اوك
12479	corpus-6-test-corpus-26-train	علىّ مغادرة الفندق قبل الظهر .	لازم اطلع من الفندق قبل الضهر.	لازم اطلع من الفندق قبل الضهر.	Aram							MSA
2695	corpus-6-test-corpus-26-train	مخروط من الأيس كريم الفانيليا ، من فضلك .	قمع بوزة على فانيلا، لو سمحت.	كراسي من الأيس كريم الفانيليا ، من فضلك .	Aram	مخروط	بوري	أيس كريم	بوزة
15553	corpus-6-test-corpus-26-train	شكراً . وأنا أيضاً . إلى اللقاء فيما بعد .	مشكور. وأنا كمان. بشوفك بعدين.	مشكور. وأنا كمان. للقائنا إشي بعدين.	Aram	أيضاً	كمان	ألقاك	بشوفك			MSA
18211	corpus-6-test-corpus-26-train	إنها مالحة قليلا , لكنني أحبها . هل أحضرتها معك طوال الطريق من اليابان ؟	هي شوي مالحة، بس بحبها. جبتها معك من اليابان طول الطريق؟	هي شوي مالحة، بس بحبها. أجبتها معك من اليابان طول الطريق؟	Aram	لكن	بس	أحبها	بحبها			MSA
571	corpus-6-test-corpus-26-train	ارتطم بي شخص وبعد ذلك اكتشفت أن محفظتي قد سرقت .	في حدا خبط فيّ . وبعدها لاحظت أنه جزداني انسرق.	نط عليي واحد وبعدها لاقيت محفظتي انسرقت.	Aram	ارتطم	خبط	محفظتي	جزداني
17482	corpus-6-test-corpus-26-train	هل يمكنني أن أحصل على رقم تليفون إيه بي سي والشركة في شيكاغو من فضلك ؟	بقدر آخذ رقم تليفون إيه بي سي والشركة في شيكاغو لو سمحت؟	ممكن أحصل على رقم تليفون إيه بي سي والشركة في شيكاغو، لو سمحت؟	Aram							MSA
16106	corpus-6-test-corpus-26-train	صباح الخير . هذا مكتب الاستقبال . هل لي أن أساعدك ؟	صباح الخير. هاذ مكتب الاستقبال.كيف بقدر أساعدك؟	صباح النور. هاي مكتب الاستقبال. في ايش ممكن أساعدك؟	Aram							MSA
15775	corpus-6-test-corpus-26-train	حسناً . كل ما أريده هو معرفة إذا ما كان المشروع سيحقق ربحاً .	ماشي. كل اللي بدي اياه هو أعرف إذا كان المشروع رح يجيب ربح.	ماشي. كل اللي بدي اياه هو أعرف إذا كان المشروع رح يجيب ربح.	Aram	يحقق	يجيب					MSA
4773	corpus-6-test-corpus-26-dev	أرغب في الحصول على بعض ورق الرسائل .	بدي شوية ورق رسائل.	بدي أجيب شوية ورق رسائل.	Aram	أرغب	بدي
17739	corpus-6-test-corpus-26-train	سأسلك بعد أن ألقي نظرة هنا وهناك .	راح أمشي بعد ما أتفقد هون وهناك.	راح أمشي بعد ما ألقي نظرة هون وهون.	Aram	أسلك	أمشي					MSA
19258	corpus-6-test-corpus-26-train	أريد سندويتش برجر بالجبن ومقليات .	بدي ساندويشة برغر بالجبنة ومقالي.	بدي ساندويشة برغر بالجبن وبطاطا مقلية.	Aram	مقليات	مقالي	جبن	جبنة			MSA
14593	corpus-6-test-corpus-26-dev	هل لديك أي شيء يبلغ سعره ثمانون دولارا فقط ؟	عندك اشي بسعر ثمانين دولر بس؟	عندك اشي بسعر ثمانين دولار بس؟	Aram	شيء	إشي					MSA
14810	corpus-6-test-corpus-26-train	أعتقد أن الحجز قد زاد عن العدد .	بظن إنو الحجز طلع زاد عن العدد.	بظن إنو الحجز طلع أكتر من العدد.	Aram	أعتقد	بظن					MSA
9126	corpus-6-test-corpus-26-dev	من فضلك , اصرف شيكا سياحيا .	لو سمحت اصرفلي شيك سياحي.	من فضلك، اصرف شيك سياحي.	Aram
4284	corpus-6-test-corpus-26-train	في أيام السنة الجديدة . وفي مناسبات خاصة مثل حفلات الزواج ومراسم منح الجوائز أو في العزاء .	بايام السنة الجديدة .و مناسبات خاصة مثل حفلات الأعراس و توزيع الجوائز أو العزا.	بأيام السنة الجديدة . وبالفرص الخاصة زي حفلات العرس وحفلات توزيع الجوايز او بالعزا.	Aram	حفلات الزواج	أعراس	منح	توزيع
16837	corpus-6-test-corpus-26-train	معدتي تؤلمني .	بطني بوجعني.	بطني بتوجعني.	Aram							MSA
14734	corpus-6-test-corpus-26-test	نرغب في حجرة تطل على البحيرة .	حابين غرفة بتطل على البحيرة.	بدينا غرفة بتطل على البحيرة.	Aram	حجرة	غرفة	نرغب	حابين			MSA
7871	corpus-6-test-corpus-26-dev	إنّ الإحصاء كرة واحدة وضربتين .	الإحصاء عبارة عن طابة وحدة وضربتين.	الإحصاء هو ضربتين في كرة وحدة.	Aram	كرة	طابة
5148	corpus-6-test-corpus-26-test	هذا خطأ .	هاظ غلط.	هاي غلطة.	Aram	هذا	هاظ
14531	corpus-6-test-corpus-26-test	أريد عمل تمويجا لشعري ليكون طليقا .	بدي أعمل كيرلي لشعري عشان اخليه مفرود.	بدي أعمل كيرلي لشعري عشان يصير لين.	Aram	طليقا	مفرود				تمويج شعر :كيرلي	MSA
6247	corpus-6-test-corpus-26-dev	من فضلك أعطني مشروباً أخر .	لو سمحت أعطيني عصير ثاني.	من فضلك ضلّي عطيني شراب تاني.	Aram	آخر	ثاني
15452	corpus-6-test-corpus-26-train	في الواقع أريد استصدار صك تأمين على هذا الطرد أيضاً .	بالواقع بدي أطلع ورقة تأمين على هالطرد كمان.	فعلاً بدي أصدر ورقة تأمين على هالطرد كمان.	Aram	أصدر	أطلع	صك	ورقة			MSA
17919	corpus-6-test-corpus-26-train	حسناً . سأتصل بك عندما يكونوا جاهزين .	ماشي. راح أتصل فيك لما يكونو جاهزين.	ماشي. راح أتصل فيك لما يكونو جاهزين.	Aram							MSA
16760	corpus-6-test-corpus-26-train	هل فندق هيلتون بعيد عن هنا ؟	فندق الهيلتون بعيد من هون؟	هل فندق الهيلتون بعيد من هون؟	Aram							MSA
4510	corpus-6-test-corpus-26-train	ماذا تفضل مع طبقك الرئيسي .	شو بتحب مع الطبق الرئيسي؟	شو بتحب تاخذ مع صحنك الأساسي؟	Aram	تفضل	بتحب
7533	corpus-6-test-corpus-26-dev	من فضلك هل لك أن ترسل بواباً إلى غرفتي في السادسة صباحاً ؟	ممكن لو سمحت تبعتلي شغيل على غرفتي الساعة ستة الصبح؟	من فضلك بتقدر تبعتلي حارس لعندي بالغرفة الساعة ستة الصبح؟	Aram	بواب	شغيل
5300	corpus-6-test-corpus-26-train	ألا تحضر لي بعض القهوة ؟	ممكن تجبلي قهوة؟	ما بتجيبلي شوية قهوة؟	Aram
10043	corpus-6-test-corpus-26-train	هل يجب أن أذهب على بنك ياباني ؟	لازم أروح على بنك ياباني؟	بدي أروح على بنك ياباني؟	Aram	أذهب	أروح
13268	corpus-6-test-corpus-26-train	هاهي فاتورتك . الحساب ثلاثة تسعة وسبعين دولار .	هاي فاتورتك. الحساب ثلاثة تسعة وسبعين دولر.	هاي فاتورتك. الحساب تسعة وسبعين دولار.	Aram	ها	هاي					MSA
17496	corpus-6-test-corpus-26-train	كيف تحب أن تأكل البيض ؟	كيف بتحب توكل البيض؟	كيف بتحب تاكل البيض؟	Aram	تأكل	توكل					MSA
2670	corpus-6-test-corpus-26-test	إذاَ ، من فضلك أعطني حجزاً جديداً .	لعاد، لو سمحت أعطيني حجز جديد.	يا زلمة، تكرم اعطيني حجز جديد.	Aram	أعطني	إنطيني
5307	corpus-6-test-corpus-26-dev	ثلاث مائة وخمسون دولارا ؟ إن هذا يفوق ميزانيتي .	ثلاثمية وخمسين دولار؟ هاظا أعلى من ميزانيتي.	تلات مية وخمسين دولار؟ هاي فوق ميزانيتي.	Aram	يفوق	أعلى
10069	corpus-6-test-corpus-26-train	زوجك أحد أفضل عملائنا .	جوزك واحد من أهم زباينا.	زوجك واحد من أحسن زباينا.	Aram	عملاء	زباين	أفضل	أهم
2441	corpus-6-test-corpus-26-train	أريد غلاية .	بدي هيتر .	بدي غلاية.	Aram					غلاية:هيتر
8371	corpus-6-test-corpus-26-train	أنا مقبل على الإصابة بنوبة برد .	حاسس حالي رح أرشح.	أنا بالطريق باصاب بكحة.	Aram	نوبة برد	رشحة
7099	corpus-6-test-corpus-26-dev	سآخذ هوت دوج وكولا .	رح آخذ سندويشة هوت دوغ وكولا.	رح أخد هوت دوج وكولا.	Aram	سوف	رح
4275	corpus-6-test-corpus-26-train	في أي مكان من ثلاثين حتى خمسين دولارا لليلة .	بأي مكان من ثلاثين لخمسين دولار لليلة.	بأي مكان من تلتين بدُك تا خمسين دولار للليلة.	Aram
11316	corpus-6-test-corpus-26-train	قبل أن ننهي العمل ، هلا أعطيتني بضعة دقائق ؟	قبل ما نخلص الشغل، بتقدر تعطيني شوي دقايق؟	قبل ما نخلص الشغل، بتقدر تعطيني شوي دقايق؟	Aram							MSA
19945	corpus-6-test-corpus-26-train	اثنان كبار وطفل عمره ثلاث سنوات .	اثنين كبار و ولد عمره ثلاث سنين.	تنين كبار وصغير عمرو ثلاث سنين.	Aram	سنوات	سنين	طفل	ولد			MSA
3683	corpus-6-test-corpus-26-train	أفهم . هل يمكنك مساعدتي في هذا المشكلة الأخرى أيضاُ ؟	فاهم. ممكن تساعدني بهاي المشكلة الثانية كمان ؟	افهم. مو زابطة تساعدني على هالمشكلة الثانية كمان؟	Aram	أيضاً	كمان	أفهم	فاهم
10662	corpus-6-test-corpus-26-test	هل توجد مضيفات يتحدثن اليابانية ؟	فيه مضيفات بتحكي ياباني؟	فيه مضيفات بتحكي ياباني؟	Aram							MSA
12822	corpus-6-test-corpus-26-train	أين محطة الحافلة التي تقصد أكسفورد ؟	وين محطة الباص اللي بتروح على أكسفورد؟	وين محطة الباص اللي بتروح على أكسفورد؟	Aram							MSA
5940	corpus-6-test-corpus-26-train	محفظتي , جواز السفر ومتعلقات شخصية أخرى .	محفظتي، جواز السفر وشغلات شخصية ثانية.	محفظتي, جواز السفر وأغراضي الشخصية الثانية.	Aram	متعلقات	شغلات
7622	corpus-6-test-corpus-26-train	أود حجز مائدة لفردين في الساعة السابعة , من فضلك .	بدي أحجز طاولة لشخصين الساعة سبعة، لو سمحت.	بدي أحجز طاولة لشخصين الساعة السابعة, لو سمحت.	Aram	فردين	شخصين
17782	corpus-6-test-corpus-26-dev	أين يمكنني الذهاب لكي أري منظراً رائعاً حقاً ؟	وين بقدر اروح عشان اشوف منظر بجنن فعلا؟	وين بقدر اروح عشان اشوف منظر بجنن فعلا؟	Aram	لكي	عشان					MSA
9746	corpus-6-test-corpus-26-train	تتهجي جي أوه آر أوه اتش .	بتنلفظ جي أوه آر أوه اتش.	بتتهجي جي أوه آر أوه اتش.	Aram	تتهجي	بتنلفظ
632	corpus-6-test-corpus-26-train	أنا متأكد أني وضعتها بالجيب الداخلي للمعطف .	أنا متأكد انه حطيتها بالجيبة الداخلية للكبوت.	أنا متأكد إني حطيتها بالجيب الداخلي للمعطف.	Aram	وضعتها	حطيتها	معطف	كبوت
14416	corpus-6-test-corpus-26-train	تبدو جميلا .	بتبين حلو.	بتبين حلوة.	Aram	جميل	حلو					MSA
2643	corpus-6-test-corpus-26-train	هل يمكن أن تقرضني سلك إمداد ؟	ممكن تعيرني وصلة كهربا؟	ممكن توديني سلك شحن؟	Aram	تقرضني	تعيرني	سلك إمداد	وصلة
419	corpus-6-test-corpus-26-train	لقد ذهبت إلى نيويورك .	أني رحت على نيويورك.	روحت على نيويورك.	Aram	ذهبت	رحت
1988	corpus-6-test-corpus-26-train	أين مظلل العيون ؟	وين الآي شدو؟	وين الكحل؟	Aram					مظلل العيون: آي شدو
17986	corpus-6-test-corpus-26-train	هل لي أن أتناول بعض الدواء لآلام في معدتي ؟	ممكن آخذ شوية دوا للوجع بمعدتي؟	ممكن أخذ شوية دوا للألم بمعدتي؟	Aram	أتناول	آخذ					MSA
6625	corpus-6-test-corpus-26-train	جرحي يؤلمني .	جرحي بوجعني.	جروحي بتوجعني.	Aram	يؤلمني	بوجعني
3289	corpus-6-test-corpus-26-train	لم أستخدم خدمة الغسيل عندكم . أيمكنك التحقق مرة أخرى ؟	أني ما استخدمت خدمة الغسيل تبعتكم. بتقدر تتأكد مرة ثانية؟	ما استعملت خدمة الغسيل عندكو. ممكن تتأكد مرة ثانية؟	Aram	لم	ما	تتحقق	تتأكد
14008	corpus-6-test-corpus-26-train	متى تعتقد سيتم إيجادها ؟	متى بتظن رح يلاقوها؟	إمتى بتظن رح يلاقوها؟	Aram	سيتم	رح	إيجادها	يلاقوها			MSA
5997	corpus-6-test-corpus-26-train	منزلك كبير . كم عدد الغرف ؟	بيتك كبير. قديش عدد الغرف؟	بيتك كبير. كم الغرف اللي عندك؟	Aram	منزلك	بيتك
14265	corpus-6-test-corpus-26-train	يا عامل الاتصال ، وصلني بمحطة الإطفاء .	يا اللي بتشتغل بالاتصالات، اشبكني مع الدفاع المدني.	يا اللي بتشتغل بالاتصالات، وصلني على محطة الدفاع المدني.	Aram	وصلني	اشبكني					MSA
18166	corpus-6-test-corpus-26-train	هل هذه هي البوابة إلي لاس فيجاس ؟	هاي البوابة لـ لاس فيجاس؟	هاي هي البوابة لـ لاس فيجاس؟	Aram	إلى	ل					MSA
13528	corpus-6-test-corpus-26-dev	سيفون الحمام لا يعمل .	سيفون الحمام مش شغال.	سايفون الحمام مش شغال.	Aram	لا	مش					MSA
11500	corpus-6-test-corpus-26-train	أريد الذهاب إلى وول ستريت . كيف أصل إلى هناك ؟	بدي اروح على وول ستريت. كيف بممكن وصل هنيك؟	بدي اروح على وول ستريت. كيف بممكن وصل هنيك؟	Aram							MSA
10473	corpus-6-test-corpus-26-test	هل يمكن أن أخذ بعض القهوة ؟	ممكن أخذ شوية قهوة؟	ممكن أخذ شوية قهوة؟	Aram							MSA
13682	corpus-6-test-corpus-26-train	هل يمكنني استعارة مضرب وكرات ؟	ممكن أستعير مضرب وطابات؟	ممكن أستعير مضرب وكور؟	Aram	كرات	طابات					MSA
4324	corpus-6-test-corpus-26-test	هاك عشرين دولارا واعطني فكة دولارين من فضلك .	هاك عشرين دولر وأعطيني صرافة دولرين ، لو سمحت.	خذ عشرين دولار ورجعلي فكة دولارين لو سمحت.	Aram	فكة	صرافة
15692	corpus-6-test-corpus-26-train	هذا ثمنه مرتفع جداً .	هاذ سعره غالي كتير.	هاد سعرو عالي كتير.	Aram	ثمنه	سعره					MSA
13396	corpus-6-test-corpus-26-train	ما هو الوزن ؟	شو الوزن؟	شو الوزن؟	Aram	ما	شو					MSA
5974	corpus-6-test-corpus-26-test	انتظر دقيقة . ربما أكون قد تركته في غرفة الاستراحة .	استنى دقيقة. ممكن أكون تركته بغرفة الاستراحة.	ستني دقيقة. يمكن اني خليته بغرفة الجلسة.	Aram	انتظر	استنى	ربما	ممكن
19620	corpus-6-test-corpus-26-train	هذه السرعة بطيئة .	هاي السرعة بطيئة.	هاي السرعة بطيئة.	Aram							MSA
19735	corpus-6-test-corpus-26-train	أريد مكواة .	بدي مكوى.	بدي مكواة.	Aram	مكواة	مكوى					MSA
11734	corpus-6-test-corpus-26-train	معذرة . هل تمانع في أن تبادل المقاعد معي ؟	معلش، بتمانع تبدل معي مكانك؟	معلش، بتمانع تبدل معي مكانك؟	Aram							MSA
10182	corpus-6-test-corpus-26-train	ياله من منظر . إنها مسالك رائعة الجمال .	ما أحلى المنظر . طرق رائعة الجمال.	شو هالمنظر. هاي الطرق روعة بالجمال.	Aram	مسالك	طرق
3995	corpus-6-test-corpus-26-test	لنستخدم كيس بارد لتخفيف الألم .	خلينا نستخدم كمادة باردة عشان يخف الوجع.	بدنا نستعمل كيس بارد عشان نخفف الألم.	Aram	كيس	كمادة	ألم	وجع
15283	corpus-6-test-corpus-26-train	حسناً . هل ستحتسي القهوة الآن أم فيما بعد ؟	ماشي. رح تشرب القهوة هسا ولا بعدين؟	ماشي. رح تشرب القهوة هسا ولا بعدين؟	Aram	فيما بعد	بعدين	حسناً	ماشي			MSA
4374	corpus-6-test-corpus-26-train	أود لعب التنس .	بدي ألعب تنس.	بدي ألعب التنس.	Aram	أود	بدي
1950	corpus-6-test-corpus-26-dev	هل يمكنكم إبقاء أمتعتي لديكم حتى الساعة الثالثة ؟	ممكن تخلولي شنتاتي عندك للساعة ثلاثة؟	بتقدروا تخلوا شنطتي معكم للساعة الثلاثة ؟	Aram	أمتعتي	شنتاتي
14542	corpus-6-test-corpus-26-train	هل هذا المقعد بجوار الممر أم بجوار النافذة ؟	هاذ الكرسي جنب الممر ولا جنب الشباك؟	هاد الكرسي جنب الدرج ولا جنب الشباك؟	Aram	مقعد	كرسي	جوار	جنب			MSA
6253	corpus-6-test-corpus-26-train	يا له من راكب ماهر للأمواج .	راكب أمواج شاطر.	شو هاد راكب الأمواج ماهر!	Aram	ماهر	شاطر
15123	corpus-6-test-corpus-26-train	يمكننا الذهاب إلى نقطة تيكي إذا لم تكن الريح قوية .	ممكن نروح على تيكي اذا ما كان الهوا قوي.	ممكن نروح على نقطة تيكي اذا ما كان الهوا قوي.	Aram	ريح	هوا	نذهب	نروح			MSA
5779	corpus-6-test-corpus-26-train	إننا سندفع الحساب ونغادر .	إحنا رح ندفع الحساب و نطلع.	رح ندفع الحساب ونطلع.	Aram	نغادر	نطلع	إننا	إحنا
10187	corpus-6-test-corpus-26-dev	لقد أصيب أناس .	في ناس إنصابوا.	صار فيها ناس.	Aram	أصيب	إنصاب
14534	corpus-6-test-corpus-26-train	متي سيأتي الطبيب ؟	متى رح يجي الدكتور؟	إمتى رح يجي الدكتور؟	Aram	يأتي	يجي	الطبيب	الدكتور			MSA
7274	corpus-6-test-corpus-26-train	أين محطة أتوبيس جرايهاوند في هذه البلدة ؟	وين مجمع باصات جرايهاوند بهاي المدينة؟	وين محطة باصات الغرايهاوند بالبلد هاي؟	Aram	بلدة	مدينة	محطة	مجمع
13022	corpus-6-test-corpus-26-train	هل لديك سيارة من طراز ستانج ؟	عندك سيارة من نوع ستانج؟	عندك سيارة من نوع ستانج؟	Aram	طراز	نوع					MSA
1394	corpus-6-test-corpus-26-train	أريد مكواة سفر .	بدي مكوى للسفر.	بدي مكواة سفر.	Aram	مكواة	مكوى
13966	corpus-6-test-corpus-26-train	أين أقرب مطعم لهذا الفندق ؟	وين أقرب مطعم لهالفندق؟	وين أقرب مطعم لهالفندق؟	Aram							MSA
11	corpus-6-test-corpus-26-train	استمر في السير في هذا الطريق حتى تجد صيدلية .	كمل مشي بهاذ الطرق لعند ما تلاقي صيدلية .	كمل امشي بهالطريق لحتى تلاقي صيدليه.	Aram	استمر	كمل	سير	مشي
12699	corpus-6-test-corpus-26-test	متى يجري عرض فيلم " رجل المحطة الأخيرة " ؟	إمتى بتيجي عرض فيلم "رجل المحطة الأخيرة"؟	إمتى بتيجي عرض فيلم "رجل المحطة الأخيرة"؟	Aram							MSA
18879	corpus-6-test-corpus-26-train	كن هناك بحلول التاسعة ، من فضلك .	كون هناك على الساعة تسعة، لو سمحت.	كون هنيك على الساعة تسعة، لو سمحت.	Aram	كن	كون					MSA
16395	corpus-6-test-corpus-26-train	للمدخنين أم لا ؟	للي بيدخنو ولا لأ؟	للي بيدخنو، ولا لأ؟	Aram	أم	ولا					MSA
3335	corpus-6-test-corpus-26-train	أجل ، أريد مشاهدة معالم المدينة .	اه، أنا بدي اشوف معالم المدينة.	أيوه، بدي أشوف معالم المدينة.	Aram	أجل	اه	أشاهد	اشوف
17808	corpus-6-test-corpus-26-train	هل يوجد بنك بالقرب من هنا ؟	في بنك قريب من هون؟	في بنك قريب من هون؟	Aram							MSA
15482	corpus-6-test-corpus-26-train	هذا يعني أن الفيلم ربما يكون غير مناسباً للأطفال تحت سن الخامسة عشر . لذلك فإن الآباء بحاجة إلى الأخذ بعين الاعتبار إذا ما كانوا سيدعون الأطفال يشاهدون الفيلم .	هاذ يعني انو الفيلم ممكن يكون مش مناسب للصغار تحت الخمسطعش . اذا الوالدين لازم يوخذوا بعين الاعتبار اذا بدهم يخلو ولادهم يتفرجو عالفيلم .	هاي يعني انو الفيلم ممكن يكون مش مناسب للعيال تحت الخمسة عشر . اذا الوالدين لازم يعتبرو اذا بدهم يخلو العيال يتفرجو عالفيلم .	Aram	غير	مش	يدعون	يخلوا			MSA
4795	corpus-6-test-corpus-26-test	دعني أنام حتى التاسعة .	خليني نايم للساعة تسعة.	خليني انام للتاسعة.	Aram	دعني	خليني	تاسعة	تسعة
2690	corpus-6-test-corpus-26-train	سرقت سجلاتي ، أيضاً .	انسرقت ملفاتي، كمان.	سرقوا سجلاتي، كمان.	Aram	أيضاً	كمان	سرقت	انسرقت
3806	corpus-6-test-corpus-26-train	لكن ، هو , يا رجل كيف أعرف أنه الشيء الحقيقة ؟	بس ، هو، يا زلمة كيف بدي أعرف أنه هاظ الإشي حقيقي؟	بس ، هو ، يا زلمة شلون بعرف إنو هاد الشي الصجي ؟	Aram	رجل	زلمة	لكن	بس
7656	corpus-6-test-corpus-26-test	إنه من الصعب لنا أن نتحدث الإنجليزية بطلاقة .	صعب علينا نحكي انجليزي بطلاقة.	صعب علينا نحكي انجليزي بطلاقة.	Aram	نتحدث	نحكي
10559	corpus-6-test-corpus-26-train	ألا تستطيع البقاء هنا خلال الإجازة ؟	ما بتقدر تضل هون خلال العطلة؟	ما بتقدر تضل هون خلال العطلة؟	Aram							MSA
4382	corpus-6-test-corpus-26-test	ماذا سيعرض في قاعة الحفلات الموسيقية اليوم ؟	شو راح ينعزف بقاعة الحفلات الموسيقية اليوم؟	شو رح يعرض بقاعة الحفلات الموسيقية اليوم ؟	Aram
2715	corpus-6-test-corpus-26-test	أخبرني عن منطقة جيدة لهذا النهر ، من فضلك .	احكيلي عن مكان كويس لهاظا النهر، لو سمحت.	قولي لي عن منطقة زينة لهالنهر ، لو سمحت .	Aram	منطقة	مكان	جيدة	كويس
1837	corpus-6-test-corpus-26-train	أريد أن أستبدل تلك الدولارات .	بدي أصرف هاي الدولرات.	بدي أغير هالدولارات.	Aram	أستبدل	أصرف	تلك	هاي
9730	corpus-6-test-corpus-26-train	كم المدة التي قضيتها في باريس ؟	قديش قعدت بباريس؟	أديش الوقت اللي قضيته بباريس؟	Aram	قضيت	قعدت
2490	corpus-6-test-corpus-26-train	لماذا إذاً ؟	ليش لعاد؟	ليش هيك ؟	Aram	إذاً	لعاد
9673	corpus-6-test-corpus-26-train	الباقي خمسة دولارات ، من فضلك .	الباقي خمس دولرات، لو سمحت.	الباقي خمسة دولارات، لو سمحت.	Aram
4464	corpus-6-test-corpus-26-train	ما هي المسرحيات الموسيقية المعروضة حاليا ؟	شو في مسرحيات موسيقية معروضة هسا؟	شو هي المسرحيات الموسيقية إلي عم تعرض حاليا ؟	Aram	حاليا	هسا
6047	corpus-6-test-corpus-26-train	أوو ، نعم ، من فضلك . أنا أتمنى أن لا يصابوا بدوار البحر .	ممم، اه، لو سمحت. أنا بس بتمنى ما يصيبهم دوار البحر.	اوو، ايه، لو سمحت. أنا بتمنى انهم ما يصيروا دغدغانين.	Aram	يصابوا	يصيبهم
8358	corpus-6-test-corpus-26-train	أي نوع من البنزين هناك ؟ السوبر ، أم العادي ، أما الخالي من الرصاص ؟	شو نوع البنزين اللي هناك؟ سوبر، عادي، ولا خالي من الرصاص؟	شو أنواع البنزين اللي عندكم؟ سوبر، ولا عادي، ولا بلا رصاص؟	Aram	أم	ولا
13133	corpus-6-test-corpus-26-train	بدأت الخمر تثملني .	بلش العرق يسكرني.	بلش العرق يسكرني.	Aram	بدأ	بلش	تثملني	يسكرني			MSA
16842	corpus-6-test-corpus-26-train	أريد زجاجة من نبيذ شيري الأسباني .	بدي قنينة من الشيري الأسباني.	بدي زجاجة من الشيري الأسباني.	Aram							MSA
4814	corpus-6-test-corpus-26-dev	أشعر بضيق في الصدر .	حاس بخنقة بصدري.	بحس بضغط بصدري.	Aram	أشعر	حاس	ضيق	خنقة
6960	corpus-6-test-corpus-26-train	لن تأخذ خصماً مهما حاولت .	ما رح توخد خصم قد ما حاولت .	ما رح تاخد خصم، مهما حاولت.	Aram	مهما	قد ما
4221	corpus-6-test-corpus-26-train	دعني افحص سائل الفرامل والمحرك . يبدو أن محرك سيارتك قد أوشك علي التوقف .	خليني أشيك على زيت البريكات و الماتور. ماتور سيارتك شكله بآخر أنفاسه.	خليني بفحص سائل الفرامل والموتور. على ما يبدو الموتور تاعت سيارتك قاعد بقرب يوقف.	Aram	أفحص	أشيك	فرامل	بريكات	محرك السيارة:ماتور
2729	corpus-6-test-corpus-26-train	لا ، أشكرك حالياً .	لا، شكراً الك حالياً.	لا ، شكرًا الي الحين.	Aram
14926	corpus-6-test-corpus-26-train	ربما لا يمكنني أن أتناول مثل هذا المشروب في أي مكان آخر .	يمكن ما بقدر أشرب هيك مشروب بأي مكان ثاني.	ممكن ما أقدر أشرب هيك مشروب بأي مكان تاني.	Aram	ربما	يمكن	أتناول	أشرب			MSA
18502	corpus-6-test-corpus-26-train	أوه ، لا . لن يكون هذا ضرورياً . أستطيع أن اعتني به . لقد قمت بالفعل بما هو اكثر من كاف .	أوه ، لا . هاذ مش ضروري . أنا بقدر أدبر بالموضوع. صراحة أنت سويت أكثر من اللازم.	أها ، لاء . ما في داعي لهيك. أنا قادر أعتني بالموضوع. صراحة أنت سويت أكثر من اللي بده.	Aram	أعتني	أدبر	قمت	سويت			MSA
14777	corpus-6-test-corpus-26-test	وهو كذلك . هل يمكنك كتابة العنوان مرة أخرى علي هذا الظرف ؟	و هو هيك. بتقدر تكتب العنوان مرة ثانية على هالظرف؟	هو كمان هيك. ممكن تكتب العنوان مرة تانية على هالظرف؟	Aram	يمكنك	بتقدر					MSA
2521	corpus-6-test-corpus-26-train	أود أن أشتري طوابع لعشرة بطاقات بريدية إلى اليابان ، من فضلك .	بدي أشتري طوابع لعشر رسائل لليابان، لو سمحت.	بدي اشتري أطوابع لعشر بطاقات بريدية على اليابان، لو سمحت.	Aram	بطاقات بريدية	رسائل
4193	corpus-6-test-corpus-26-train	هل ثمة تخفيضات للأعضاء المشاركين ؟	في أي تخفيظات للأعظاء المشاركين؟	فيه خصومات للأعضاء المشاركين؟	Aram	ثمة	أي	أعضاء	أعظاء
14219	corpus-6-test-corpus-26-train	أفهم . في الواقع إنه به فيلم عالي السرعة . هل تمانع إذا أخرجته ؟	فهمت. فعلاً هو فيه فلم سرعته عالية. بتمانع لو طلعته؟	فهمت. بالفعل, هو فيلم بتكون سرعته عالية. ما بتمانع لو طلعته؟	Aram	أخرجته	طلعته	في الواقع	فعلاً			MSA
13480	corpus-6-test-corpus-26-train	لماذا يختلف السعر عن الموجود في العداد ؟	ليش السعر غير عن اللي عالعداد؟	ليش السعر غير اللي عالعداد؟	Aram	يختلف	غير					MSA
7349	corpus-6-test-corpus-26-train	هل لي بهذه وهذه ، من فضلك ؟	ممكن آخذ هاي وهاي ، إذا تكرمت؟	ممكن هاي وهاي، إذا بتسمح؟	Aram
3120	corpus-6-test-corpus-26-train	منذ أمس .	من مبارح.	من إمبارح.	Aram	منذ	من
9611	corpus-6-test-corpus-26-dev	هل بإمكاني ترك رسالة ؟ إنني أتصل للتأكيد على موعدي مع السيد إيبرت الأربعاء المقبل في الحادية عشرة صباحاً .	ممكن أترك رسالة؟ أنا بتصل عشان اأكد على موعدي مع الإستاذ إيبرت يوم الأربعاء الجاي الساعة احدعش الصبح.	بقدر اترك رسالة؟ انا كنت بدق عشان اتأكد من موعدي مع الاستاذ إيبرت يوم الأربعاء الجاي الساعة ١١ الصبح.	Aram	السيد	الإستاذ
3856	corpus-6-test-corpus-26-train	من فضلك أرسل أحداً للطابق العلوي ليأخذ حقائبي الساعة السادسة والنصف .	لو سمحت ودي حدا للطابق الفوقاني عشان يوخذ شناتيي الساعة ستة ونص.	من فضلك ابعت حد على الدور الفوق ياخذ شناطي الساعة ستة ونص.	Aram	أرسل	ودي	علوي	فوقاني
15788	corpus-6-test-corpus-26-train	أعد شحن البطارية من فضلك .	عيد شحن البطارية من فضلك .	حمل البطارية من فضلك يا زلمة.	Aram	أعد	عيد					MSA
4321	corpus-6-test-corpus-26-test	أي فيلم توصي به ؟	أي فلم بتنصحني فيه؟	شو الفيلم اللي بتنصح فيه؟	Aram	توصي	بتنصحني
18938	corpus-6-test-corpus-26-train	قهوة بالسكر .	قهوة مع سكر.	قهوة مع سكر.	Aram							MSA
5272	corpus-6-test-corpus-26-train	هل لك بأن تضيق منطقة الوسط سنتيمترات ؟	ممكن تظيقلي الخصر كم صانتي؟	ممكن تصغر منطقة الوسط سنتمترات؟	Aram	منطقة الوسط	الخصر	سنتيمتر	صانتي
7761	corpus-6-test-corpus-26-test	هل لي أن أرى السيارة ؟	ممكن أشوف السيارة؟	ممكن اشوف السيارة؟	Aram	هل لي	ممكن
7883	corpus-6-test-corpus-26-train	متى سيصل القطار إلى سان دييجو ، من فضلك ؟	أميت رح يوصل القطار على سان دييجو، لو سمحت؟	إيمتى رح يوصل القطار على سان دييجو، لو سمحت؟	Aram
13953	corpus-6-test-corpus-26-train	هلا مررت لي الملح ، من فضلك ؟	ممكن تقربلي الملح، لو سمحت؟	ممكن تعديلي الملح، لو سمحت؟	Aram	مررت	تقرب					MSA
4129	corpus-6-test-corpus-26-train	ما رأيك في بعض القهوة ؟	شو رأيك بكاس قهوة؟	شو رأيك فينا نشرب قهوة؟	Aram
16312	corpus-6-test-corpus-26-train	شكراً جزيلاً لعطفك .	مشكور كثير على طيبتك.	مشكور كتير على طيبتك.	Aram	عطفك	طيبتك	جزيلاً	كثير			MSA
7123	corpus-6-test-corpus-26-train	يمكنك رؤية مبنى ابيض اللون ، أليس كذلك ؟ إنه أمام ذلك المبنى .	بتقدر تشوف عمارة بيضا، صح؟ هو قبال هاي العمارة.	قادر تشوف العمارة البيضاء، مو كدة؟ هي قدام هذيك العمارة.	Aram	أمام	قبال	بيضاء	بيضا
17488	corpus-6-test-corpus-26-test	أين الكاتدرائية ؟	وين الكنيسة الكبيرة؟	وين الكنيسة الكبيرة؟	Aram							MSA
5447	corpus-6-test-corpus-26-train	سقط مني واحدا من عصى التزلج .	وقعت مني عصاية من عصي التزلج.	وقع مني واحد من عصيات التزلج.	Aram	سقطت	وقعت	عصى	عصي
9701	corpus-6-test-corpus-26-train	ما هي الماركات التي توجد لديك ؟	شو الماركات اللي عندك؟	شو هي الأسماء اللي عندك ؟	Aram
14242	corpus-6-test-corpus-26-train	من فضلك أظهرها مع المشتريات في الجمارك في المطار .	لو سمحت، طلعها مع الاغراض اللي اشتريتهن بالجمارك بالمطار.	لو سمحت، اورجيها مع الشرا بالجمارك بالمطار.	Aram	أظهرها	طلعها					MSA
16258	corpus-6-test-corpus-26-train	أريد أن أمر بنيويورك في طريقي إلى تورونتو .	بدي امر على نيويورك بطريقي لتورونتو.	بدي امر على نيويورك بالطريق حق تورونتو.	Aram							MSA
19494	corpus-6-test-corpus-26-train	حبوب عسر الهضم تختلف عن حبوب ألم المعدة ، أليس كذلك ؟	حبوب عسر الهضم بتختلف عن حبوب وجع المعدة، مش هيك؟	حبوب الهضم بتختلف عن حبوب المعدة، مش هيك؟	Aram	ألم	وجع					MSA
15025	corpus-6-test-corpus-26-train	مصاب بالصداع .	عندي صداع.	عندي صداع.	Aram	صداع	عندي					MSA
1800	corpus-6-test-corpus-26-train	هل من الممكن أن احصل علي بعض الفاكهة ؟	ممكن تجيبلي شوية فواكة؟	ممكن أجيب شوية فواكه؟	Aram	فاكهة	فواكه	بعض	شوية
19497	corpus-6-test-corpus-26-test	أريد أن أرى الميناء .	بدي اشوف المينا.	بدي اشوف المينا.	Aram							MSA
12005	corpus-6-test-corpus-26-train	ما الكمية التي تريدها ؟	شو الكمية اللي بدك ياها؟	شو الكمية اللي بدك ياها؟	Aram							MSA
1668	corpus-6-test-corpus-26-train	واحد هامبورجر بالجبن و عصير برتقال , من فضلك .	واحد تشيز برقر وعصير بردقان ، لو سمحت.	همبرجر وحدة مع جبنة و عصير برتقال, لو سمحت.	Aram	برتقال	بردقان			هامبورجر بالجبن: تشيز برقر
2947	corpus-6-test-corpus-26-train	يجب أن لا تكون طويلة . خمسة عشر دقيقة في الأغلب .	المفروض ما يطول. خمسطعشر دقيقة غالباً.	لازم ما تكون طويلة. خمستاشر دقيقة بالكثير.	Aram	في الأغلب	غالباً	يجب	المفروض
5596	corpus-6-test-corpus-26-train	من فضلك ، احضر طعام الإفطار إلى غرفتي في السابعة من صباح الغد .	لو سمحت جبلي فطوري على غرفتي بكرا الساعة سبعة الصبح.	من فضلك، جيبلي الفطور على غرفتي الساعة سبعة بكرة الصبح.	Aram	احضر	جيب	سابعة	سبعة
14786	corpus-6-test-corpus-26-train	ما ذا تفعل في وقت فراغك ؟	شو بتعمل بوقت فراغك؟	شو بتعمل بوقت فراغك؟	Aram	تفعل	تعمل					MSA
18951	corpus-6-test-corpus-26-test	هل سمعت من قبل عن أسبوع ذهبي في اليابان ؟	سمعت قبل هيك عن الاسبوع الذهبي باليابان؟	شفت قبل هيك عن اسبوع الذهبي باليابان؟	Aram							MSA
16718	corpus-6-test-corpus-26-train	لقد قطع إصبعي . هل يوجد مطهر ؟	انجرح اصبعي. في سبيرتو؟	قطعت اصبعي. في مطهر؟	Aram	قطع	انجرح			مطهر : سبيرتو		MSA
8734	corpus-6-test-corpus-26-train	عظيم ، ذلك مكان لطيف .	وااااو، هاذ مكان حلو.	ممتاز، هاي المكان حلوة.	Aram	عظيم	وااو
2726	corpus-6-test-corpus-26-train	من فضلك أعطني تقريراً عن الحادث .	لو سمحت أعطيني تقرير للحادث.	لو سمحت أعطني تقرير عن الحادثة.	Aram
15604	corpus-6-test-corpus-26-train	شريحتين وزجاجة سبرايت .	قطعتين وقنينة سبرايت .	تكعيتين و زجاجة سفن اب.	Aram	شريحتين	قطعتين	زجاجة	قنينة			MSA
10817	corpus-6-test-corpus-26-train	ما هو السعر ؟	شو السعر؟	شو السعر؟	Aram							MSA
17548	corpus-6-test-corpus-26-train	ما هو اسم الرسام ؟	شو اسم الرسام؟	شو اسم الرسام؟	Aram	ما	شو					MSA
3747	corpus-6-test-corpus-26-train	بالتأكيد . سر في خط مستقيم ثم اتجه يميناُ عند الناصية الثالثة . ستجده على يمينك .	أكيد. امشي دغري ولف يمين من الدخلة الثالثة. راح تلاقيه على يمينك.	أكيد. رووح دوغري، بعدين شوف يمينك عند الشارع التالت. رح تلاقيه على يمينك.	Aram	تجده	تلاقيه	اتجه	لف
16811	corpus-6-test-corpus-26-train	أشعر بالإعياء .	بحس بالتعب.	بحس حالي تعبان.	Aram	إعياء	تعب					MSA
7414	corpus-6-test-corpus-26-train	لا أستطيع أن أجد كاميرتي .	ما قدرت الاقي الكميرا تبعتي.	مش قادر لاقي كاميرتي.	Aram	أستطيع	قدرت	أجد	ألاقي
7574	corpus-6-test-corpus-26-train	خاص من فضلك .	خاص من فظلك.	مطلوب من فضلك .	Aram
8050	corpus-6-test-corpus-26-train	فهمت الأمر .	فهمت الموضوع.	فهمت الحكي.	Aram	أمر	موضوع
5138	corpus-6-test-corpus-26-train	لقد حاولت إجراء مكالمة دولية ، هل نجح ذلك معك من قبل ؟	جربت أعمل مكالمة دولية. زبطت معك قبل هيك؟	جرّبت أعمل مكالمة دولية، بتزبط معك هالحكي من قبل؟	Aram	نجح	زبط	أجري	أعمل
3295	corpus-6-test-corpus-26-train	كلاً ، لا يوجد .	لا، ما في.	لا ، ما في .	Aram	كلا	لا
8675	corpus-6-test-corpus-26-train	أنت هنا .	إنت هون.	إنت هون.	Aram
12945	corpus-6-test-corpus-26-train	ستكون بالبيت في حوالي الثلاثة .	رح تكون بالدار حوالي الثلاثة.	رح تكون بالبيت حوالي الثلاثة.	Aram	بيت	دار					MSA
10985	corpus-6-test-corpus-26-train	حسبما يقول جورو ، فاللسيد يامادا طفلان .	زي ما بقول جورو، السيد يامادا عنده طفلين.	زي ما بقول جورو، السيد يامادا عنده طفلين.	Aram							MSA
19347	corpus-6-test-corpus-26-train	هل ثمة رحلة في المدينة ؟	في رحلة بالبلد؟	في رحلة بالبلد؟	Aram							MSA
140	corpus-6-test-corpus-26-train	لا ، هل لي أن أقترح أخذ غرفة ذات سريرين للاستخدام الفردي ؟ فنحن لدينا واحدة .	لا. ممكن أقترح إني أوخذ غرفة بس لاستخدام فردي ؟ عنا وحدة.	لا، بدي اقترح ناخذ غرفة فيها سريرين لنستخدمها فردي؟ عنا وحدة هيك.	Aram	لدينا	عنا	سريرين	تختين
7281	corpus-6-test-corpus-26-train	أليست المطاعم اليابانية في كيوتو غالية ، بالرغم من ذلك ؟	مش المطاعم اليابانية في كيوتو غالية؟	مش المطاعم اليابانية في كيوتو غالية، مع هيك؟	Aram	أليست	مش
9324	corpus-6-test-corpus-26-train	معذرة , ضابط ؟	عفواً، ضابط؟	معلش, ضابط؟	Aram
19755	corpus-6-test-corpus-26-train	إني أتزلك مرتين في الشهر خلال الموسم .	أنا بنزلك مرتين بالشهر طول الموسم.	أنا بنزلك مرتين بالشهر طول الموسم.	Aram							MSA
15899	corpus-6-test-corpus-26-train	لدي معظم العائلات مصدرين للدخل .	أغلب العيل عندهم مصدرين للدخل.	عند أغلب العيل كزبتين مصاري.	Aram	عائلات	عيل	معظم	أغلب			MSA
9337	corpus-6-test-corpus-26-train	أخرج متعلقاتي الثمينة , من فضلك .	طلع اشيائي الغالية برا، لو سمحت.	طلعلي أغراضي الغالية يا رجاء.	Aram	أخرج	طلع	متعلقاتي	أشيائي
4648	corpus-6-test-corpus-26-test	إنني مع أصدقائي .	أني مع صحابي.	أنا مع ربعي.	Aram	أصدقائي	صحابي
19752	corpus-6-test-corpus-26-dev	لقد بلغ ثمانية وثلاثين دولاراً إجمالا .	صار ثمانية وثلاثين دولر كله.	صار ثمانية وثلاثين دولار بالاجمال.	Aram	إجمال	كله					MSA
1993	corpus-6-test-corpus-26-train	نريد ركناً هادئاً ، إن أمكن .	بدنا زاوية هادية، اذا ممكن.	بدنا نجلس بمكان هادي، اذا بينفع.	Aram	ركن	زاوية
12589	corpus-6-test-corpus-26-train	هل سأسترد ما أنفقت عند عودتي إلى اليابان ؟	رح أرجع اللي صرفته لما أرجع على اليابان؟	رح أرجع اللي صرفته لما أرجع على اليابان؟	Aram							MSA
11019	corpus-6-test-corpus-26-train	من فضلكم . اربطوا الأحزمة .	من فضلكم، إربطوا الأحزمة.	من فضلكم، إربطوا الأحزمة.	Aram							MSA
11720	corpus-6-test-corpus-26-dev	أعرض علىّ مقاساً أكبر .	عرض عليي مقاس أكبر.	عرض عليي مقاس أكبر.	Aram							MSA
14168	corpus-6-test-corpus-26-train	نقدا أم ببطاقة الائتمان ؟	كاش ولا بالفيزا؟	بكاش ولا بالفيزا؟	Aram	نقد	كاش			بطاقة ائتمان : فيزا		MSA
10403	corpus-6-test-corpus-26-train	هل يمكن أن تقول لي ذلك بعبارة أخرى ؟	بتقدر تحكيه بجملة غير؟	ممكن تقلي هاي الحكي بطريقة ثانية؟	Aram	أخرى	غير	عبارة	جملة
7479	corpus-6-test-corpus-26-train	أريد بعض الغسول لإزالة كريم ريفلون .	بدي غسول مشان اشيل كريم ريفلون.	بدي شوية صابون باش اشيل كريمة ريفلون.	Aram	أزيل	أشيل
17840	corpus-6-test-corpus-26-train	سكين ، من فضلك .	سكينة، لو سمحت.	سكينة، لو سمحت.	Aram	سكين	سكينة					MSA
19232	corpus-6-test-corpus-26-train	هل لديك أحجام أكبر ؟	عندك أحجام أكبر؟	عندك أحجام أكبر؟	Aram							MSA
18412	corpus-6-test-corpus-26-dev	أريدك أن تصحبني إلى بعض الأماكن الشيقة . أنني سائح , أنت تعرف .	بدي اياك توخذني معك على بعض الأماكن الحلوة. أنا سايح, إنت بتعرف.	بدي اياك تروح معي على بعض الأماكن الحلوة. أنا سائح, انت عارف.	Aram	تصحبني	توخذني	شيقة	حلوة			MSA
5680	corpus-6-test-corpus-26-train	هل لديك أية نباتات أو فواكه ؟	في عندك أي خضار أو فواكه؟	عندك أي نباتات أو فواكه؟	Aram	أية	أي
373	corpus-6-test-corpus-26-test	هل تعيش بالقرب من هنا ؟	انت عايش قريب من هون؟	هل انت ساكن جنب هون؟	Aram	تعيش	عايش
2734	corpus-6-test-corpus-26-train	حسنا ، ابق على الخط . سيد/ ناكاجيما ، الآنسة/ سايتو يبدو أنها لا ترد على المكالمة . هل تريدني أن أتصل عليها فترة أطول ؟	طيب ، خليك معي على الخط. السيد ناكاجيما ، الست سايتو شكلها ما بترد على المكالمة. بدك أرن عليها لمدة أطول شوي؟	اوكي, اضل ع الخط. ابو ناكاجيما, بنت السايتو مبينة ما هية رادة الاتصال. بدك اناديلها شوي زيادة؟	Aram	ابق	خليك	أتصل	أرن
11404	corpus-6-test-corpus-26-train	حسنا . هل يمكن أن أترك السيارة في أي مكان ؟ ما هي رسوم ركن السيارة ؟	طيب، بقدر اترك السيارة بأي مكان؟ كم الرسوم على ركن السيارة؟	طيب، بقدر اترك السيارة بأي مكان؟ كم الرسوم على ركن السيارة؟	Aram							MSA
941	corpus-6-test-corpus-26-train	الآن أعرف . ماذا كان الخطأ . ؟	هسا عرفت . شو اللي كان غلط . ؟	هسا بعرف. شو كان الغلط؟	Aram	الآن	هسا	خطأ	غلط
12770	corpus-6-test-corpus-26-dev	مزيد من النبيذ ، من فضلك .	زيادة من العنبية، لو سمحت.	زيادة من العنبية، لو سمحت.	Aram							MSA
17295	corpus-6-test-corpus-26-train	هل هناك أي أماكن في المنطقة تلقي تزكية كثيرة ؟	في أماكن بالمنطقة بتجيب تزكية كثيرة؟	في أماكن بالمنطقة بتجيب تزكية كثير؟	Aram	تلقى	بتجيب					MSA
18527	corpus-6-test-corpus-26-train	من فضلك تروى .	لو سمحت هدي.	الرجاء تروي.	Aram	تروى	هدّي					MSA
1036	corpus-6-test-corpus-26-train	أود الحصول على واحدة كبيرة .	أني بدي وحدة كبيرة.	بدي وحدة كبيرة.	Aram	واحدة	وحدة
16339	corpus-6-test-corpus-26-train	آه ، هذا جميل . ماذا علي أن أصنع ؟	آه، هاذ حلو. شو لازم اعمل؟	آه، هادي حلوة. شو لازم اعمل؟	Aram	أصنع	أعمل					MSA
4945	corpus-6-test-corpus-26-train	مستحيل . نحن في إجازة . إنني أرفض الجلوس في غرفة بالفندق ومشاهدة البيسبول في التلفاز . أريد الذهاب لمشاهدة مسرحية .	مستحيل. احنا بإجازة. أنا ما بدي أقعد بغرفة بالفندق اشوف البيسبول بالتلفزيون. بدي أروح أحظر مسرحية.	ما باليد حيلة. احنا على اجازة. انا مش راضي اقعد بالغرفة بالفندق واحضر البيسبول عالتلفزيون. بدي أروح احضر مسرحية.	Aram	أشاهد	أحظر	أجلس	أقعد
19760	corpus-6-test-corpus-26-train	ولدت في أول أبريل سنة ألف وتسعمائة وخمس وخمسين .	انولدت بواحد نيسان سنة ألف وتسعمية وخمس وخمسين.	ولدت بأول نيسان سنة ألف وتسعماي وخمس وخمسين.	Aram	ولدت	انولدت	أول	واحد			MSA
9061	corpus-6-test-corpus-26-dev	هل تتوقف هذه الحافلة بالقرب من الفندق ؟	هاد الباص بوقف قريب من الفندق؟	بتوقف هاي الباصة عند الفندق؟	Aram
7812	corpus-6-test-corpus-26-train	ماذا عن مائة دولار ؟	شو رأيك بمية دولار؟	شو عن مية دولار؟	Aram
6291	corpus-6-test-corpus-26-train	إنه في نهاية هذا الطريق .	هو بنهاية هاظا الطريق.	هوه بآخر هالشارع.	Aram	هذا	هاظا
11467	corpus-6-test-corpus-26-train	أود بعضاً من القوة الجسدية .	بدي شوي قوة بالجسم.	بدي شوي قوة بالجسم.	Aram							MSA
19469	corpus-6-test-corpus-26-train	أين يمكنني أن أجد سوبر ماركت ؟	وين بقدر الاقي سوبرماركت؟	وين بقدر الاقي سوبرماركت؟	Aram							MSA
8295	corpus-6-test-corpus-26-train	أنت لا تمانع في حضوري إلى منزلك ؟	إنت ما عندك مشكلة اني آجي على بيتك؟	ما عندك مشكلة ازورك على بيتك؟	Aram	أحضر	آجي
10831	corpus-6-test-corpus-26-train	حرف " ت " " كما في توم ، نعم ها هي لدي هنا ، تارو .	الحرف " ت " "زي في توم، ايوة هاي عندي هون، تارو."	الحرف " ت " "زي في توم، ايوة هاي عندي هون، تارو."	Aram							MSA
641	corpus-6-test-corpus-26-test	هل يمكن أن تخبرني باسم ورقم الطرف الذي تريد الاتصال به ؟	ممكن تعطيني اسم ورقم الجهة اللي بدك تتصل فيها؟	بتقدري تقوليلي شو اسم ورقم الشخص اللي بدك تحكي معه؟	Aram	طرف	جهة	تريد	بدك
13267	corpus-6-test-corpus-26-train	حسناً . سوف أخذ اثنين فقط . شكراً .	ماشي، رح أوخذ بس ثنين. شكراً.	زين، رح آخذ بس تنين. مرسي.	Aram	حسناً	ماشي					MSA
13126	corpus-6-test-corpus-26-train	تهجى الكلمة من فضلك ؟	هجي الكلمة لو سمحت؟	هجي الكلمة لو سمحت؟	Aram	تهجى	هجي					MSA
13755	corpus-6-test-corpus-26-dev	أوه ، هناك الكثير مما يجب أن تراه في قرية جرينتش .	اووه، فيه شغلات كثير لازم تشوفها في قرية جرينتش.	اووه، فيه شغلات كثير لازم تشوفها في القرية جرينتش.	Aram	هناك	فيه	يجب	لازم			MSA
14805	corpus-6-test-corpus-26-train	أود إرسال برقية لاسلكية .	بدي أبعث رسالة لاسلكية.	بدي أبعت تلغرام لاسلكي.	Aram	برقية	رسالة					MSA
4788	corpus-6-test-corpus-26-train	هل سنذهب بالحافلة ؟	راح نروح بالباص؟	بدنا نروح عالباص؟	Aram	نذهب	نروح	حافلة	باص
11109	corpus-6-test-corpus-26-dev	هل يمكن أن تخلي المنضدة لي ، من فضلك .	ممكن تفرغلي الطاولة، لو سمحت.	ممكن تفرغلي الطاولة، لو سمحت.	Aram							MSA
5035	corpus-6-test-corpus-26-train	هل يمكنني أن ألقي نظرةً أخرى على قائمة الطعام ؟	ممكن أشوف المنيو مرة ثانية؟	ممكن أشوف القائمة تاني ؟	Aram	ألقي نظرة	أشوف			قائمة الطعام: منيو
12805	corpus-6-test-corpus-26-dev	هل أعلن بالفعل عن وجوب الصعود إلى الطائرة ؟	هل فعلا اعلنوا انه لازم نصعد على الطيارة؟	هل فعلا اعلنوا انه لازم نصعد على الطيارة؟	Aram							MSA
18830	corpus-6-test-corpus-26-train	فقط دواء للبرد .	بس دوا للفلونزا.	بس دوا للزكام.	Aram	برد	فلونزا					MSA
19862	corpus-6-test-corpus-26-train	من فضلك استدع سيارة إسعاف .	من فظلك اطلب سيارة إسعاف.	من فضلك طلب سيارة إسعاف.	Aram	استدعي	اطلب					MSA
14976	corpus-6-test-corpus-26-train	معي تذكرة طيران إلى سان فرانسيسكو .	معي تذكرة طيران لـسان فرانسيسكو.	عندي تذكرة طيران لـ سان فرانسيسكو.	Aram							MSA
18848	corpus-6-test-corpus-26-test	عندئذ ، ستأتي إلى شارع تسوق . إذا سلكت الشارع ستصل إلى المحطة .	بالوقت هاظ، رح تيجي على شارع للتسوق. اذا مشيت هالشارع رح توصل عالمحطة.	بالوقت هاي، رح تيجي على شارع للتسوق. اذا دقت هالشارع رح توصل عالمحطة.	Aram	سلكت	مشيت	عندئذ	بالوقت			MSA
14783	corpus-6-test-corpus-26-train	أود الذهاب إلى محل الهارودز . هل معك خريطة , من فضلك ؟	بدي اروح على محل الهارودز. معك خريطة, لو سمحت؟	بدي اروح على محل الهارودز. عندك خريطة, لو سمحت؟	Aram	أذهب	أروح					MSA
3129	corpus-6-test-corpus-26-train	تشمل تأمين ضد التصادم والدين .	بتشمل تأمين ظد التصادم والدين.	بتشمل تأمين ضد الاصطدام والدين.	Aram	ضد	ظد
10006	corpus-6-test-corpus-26-train	نحن نفتح في التاسعة صباحاً .	إحنا منفتح الساعة تسعة الصبح.	احنا بنفتح الساعة تسعة الصبح.	Aram
4104	corpus-6-test-corpus-26-train	النافذة محشورة .	الشباك محشور بالزواية.	الشباك عالق.	Aram	نافذة	شباك
13717	corpus-6-test-corpus-26-train	ناكاي .	ناكاي .	عم بناكي.	Aram							MSA
16696	corpus-6-test-corpus-26-train	هل تريدني أن ألتقط لك صورة ؟	بدك ياني اوخذلك صورة؟	بدك اني اصورلك صورة؟	Aram	ألتقط	أوخذ					MSA
3111	corpus-6-test-corpus-26-dev	لا أفهم الإنجليزية الأمريكية ، إنما أتحدث الإنجليزية الراقية .	ما بفهم الإنجليزي الأمريكي، أنا بحكي بالانجليزي الراقي.	ما بفهم الإنجليزي الأمريكي، بس بحكي الإنجليزي المرتب.	Aram	إنجليزية	إنجليزي
2318	corpus-6-test-corpus-26-train	طلبي لم يأت .	طلبي ما وصل.	مش عم بييجي طلبي.	Aram	يأت	وصل
18770	corpus-6-test-corpus-26-train	تأجلت الرحلة الجوية لمدة خمسة وأربعين دقيقة .	الطيارة تأجلت خمسة و أربعين دقيقة.	الطيارة تأخرت خمسة و أربعين دقيقة.	Aram							MSA
7305	corpus-6-test-corpus-26-train	أريد سعر الكتاب .	بدي سعر الكتاب.	بدي سعر الكتاب.	Aram	أريد	بدي
19505	corpus-6-test-corpus-26-train	سآخذ عشرين دب لعبة من أكبر حجم .	راح آخذ عشرين دب لعبة من الحجم الكبير.	راح أاخذ عشرين دب لعبة من الحجم الكبير.	Aram							MSA
14195	corpus-6-test-corpus-26-train	متى يمكنني أن آخذ حماما ؟	متى بقدر أوخذ دش؟	إمتى بقدر أتحمم؟	Aram	حمام	دش					MSA
17963	corpus-6-test-corpus-26-train	إلى متي يظل مطعم الفندق متاحا للاستخدام من قبلي ؟	لمتى بظل مطعم الفندق مفتوح حتى أقعد فيه؟	لمتى بضل مطعم الفندق مفتوح لأستخدمه أنا؟	Aram	متاح	مفتوح					MSA
1462	corpus-6-test-corpus-26-train	استمر يا سيدي .	كمل يا سيدي .	كمل يا سيدي.	Aram	استمر	كمل
15666	corpus-6-test-corpus-26-train	يبدو طفلي منهكاً بسبب الحمى .	على ما يبدو ابني تعبان من الحرارة.	على ما يبدو ابني تعبان من الحمى.	Aram	حمى	حرارة	منهك	تعبان			MSA
19619	corpus-6-test-corpus-26-train	متى يتعين على الوصول إلى المطار ؟	متى لازم أكون بالمطار؟	إمتى لازم أوصل على المطار؟	Aram	يتعين	لازم					MSA
9606	corpus-6-test-corpus-26-train	كانت سيارته تسير بكامل سرعتها .	سيارته كانت ماشية على اعلى سرعة.	كانت سيارته طايرة بكل سرعتها.	Aram
9747	corpus-6-test-corpus-26-train	هل تبغي شراباً ؟	بتحب تشرب إشي؟	بدك شراب؟	Aram	تبغي	بتحب
8577	corpus-6-test-corpus-26-train	هل يمكن أن أحصل على كوكاكولا دايت ؟	ممكن تعطيني كولا دايت؟	ممكن أخذ كوكاكولا دايت؟	Aram
5772	corpus-6-test-corpus-26-train	آسف . لقد اتصلت بالرقم الخطأ . هذه وكالة تانكيوشا الصحفية .	آسف. رنيت على الرقم الغلط. هاي وكالة تانكيوشا الصحفية.	معذرة، انا اتصلت بالرقم غلط. هاي وكالة تانكيوشا الصحفية.	Aram
5570	corpus-6-test-corpus-26-train	من مائة .	من مية.	من مية.	Aram	مائة	مية
12782	corpus-6-test-corpus-26-train	أين بوابة ركوب الطائرة بالنسبة لهذه الرحلة ؟	وين باب صعود الطيارة لهاي الرحلة؟	وين باب صعود الطيارة لهاي الرحلة؟	Aram							MSA
14014	corpus-6-test-corpus-26-train	أتمنى لك عاما سعيدا جدا .	بتمنالك سنة سعيدة كثير.	بتمنالك سنة سعيدة كتير.	Aram	جدا	كثير	عام	سنة			MSA
13862	corpus-6-test-corpus-26-train	أريد أن أرسل ذلك بطريقة التوصيل العام .	بدي أبعث هاي عن طريق التوصيل العام.	بدي أبعت هيك عن طريق التوصيل العام.	Aram	أرسل	أبعث					MSA
12012	corpus-6-test-corpus-26-train	خلطة جمبري لها ، وكذلك لي .	خليطة جمبري لهي وكمان لي.	خليطة جمبري لهي وكمان لي.	Aram							MSA
14612	corpus-6-test-corpus-26-train	بدون حليب , من فضلك .	بدون حليب, لو سمحت.	بدون حليب, لو سمحت.	Aram							MSA
2862	corpus-6-test-corpus-26-train	حسنا . ما هو اسم شريكك ورقمه ، من فضلك .	ماشي . شو اسم شريكك ورقمه، لو سمحت.	ماشي. شو اسم شريكك ورقمه، لو سمحت؟	Aram	حسنا	ماشي	اسم	إسم
16227	corpus-6-test-corpus-26-train	أجل . اسمك ورقم غرفتك , من فضلك .	نعم. اسمك ورقم غرفتك , لو سمحت .	اي والله. شو اسمك ورقم الغرفة لو سمحت؟	Aram	أجل	نعم					MSA
11030	corpus-6-test-corpus-26-test	عفواً . هل يوجد أي جسر بالقرب من هنا ؟	معذرة، فيه جسر قريب من هون؟	معذرة، فيه جسر قريب من هون؟	Aram							MSA
6073	corpus-6-test-corpus-26-train	ما هو موعد وصولنا المقدر ؟	شو هو قت وصولنا المتوقع؟	إمتى موعد وصولنا المتوقع؟	Aram	مقدر	متوقع
9683	corpus-6-test-corpus-26-train	سدادة حوض الاستحمام لا تقفل بالكامل .	سدادة البانيو ما بتسكر على الأخير.	دكاية البانيو ما بتسكر زين.	Aram	تقفل	تسكر	بالكامل	علأخير	حوض استحمام :بانيو
14813	corpus-6-test-corpus-26-train	ركلة موفقة . كادت تدرك الهدف .	تسديدة موفقة. راحت ما تيجي جول.	دسة موفقة. كادت توصل للهدف.	Aram	ركلة	تسديدة	كادت	راحت	هدف : جول		MSA
16542	corpus-6-test-corpus-26-train	لا أفهم شرحك .	مش فاهم شرحك.	مش فاهم شرحك.	Aram	لا	مش					MSA
16080	corpus-6-test-corpus-26-test	ما هذا الشارع ؟	شو هاظ الشارع؟	شو هاد الشارع؟	Aram	ما	شو					MSA
10869	corpus-6-test-corpus-26-train	ما فائدة هذا ؟	شو فايدة هاد؟	شو فايدة هاد؟	Aram							MSA
12766	corpus-6-test-corpus-26-test	أين أقرب صيدلية ؟	وين أقرب صيدلية؟	وين أقرب صيدلية؟	Aram							MSA
8271	corpus-6-test-corpus-26-train	ما هو الصنف المميز للمحل ؟	شو هو الصنف المميز بالمحل؟	شو النوع اللي بميز المحل؟	Aram
9358	corpus-6-test-corpus-26-train	كيف يكون الزحام في مثل تلك الجولات ؟	قديش بكون في زحمة في مثل هاي الرحلات؟	شلون بتكون الزحمة بمتل هيك طلعات؟	Aram	زحام	زحمة
16878	corpus-6-test-corpus-26-train	من ثلاثين ألف ين .	من ثلاثين ألف ين.	من ثلاثين ألف ين.	Aram							MSA
12560	corpus-6-test-corpus-26-train	إن بها تشكيلة من سبعة فيتامينات ومعادن .	فيها مزيج من سبع فيتامينات ومعادن.	فيها مزيج من سبع فيتامينات ومعادن.	Aram							MSA
7925	corpus-6-test-corpus-26-train	أريد بعض الشامبو .	بدي نتفة شامبو.	بدي شوية شامبو.	Aram		نتفة
6221	corpus-6-test-corpus-26-train	ما هو طعم هذا الطبق ؟	شوطعم هاذ الأكل؟	شو طعم هالطبق ؟	Aram	أكل	طبق
19889	corpus-6-test-corpus-26-train	ليس ثمة طعام لا أحب أكله .	ما في أكل ما بحب أوكله.	ما في أكل ما بحب أكله.	Aram	طعام	أكل					MSA
15784	corpus-6-test-corpus-26-train	جميل . هل تريدين إيشارباً يتناسب مع هذا ؟	حلو. بدك شال بلبق مع هاذ؟	حلو. بتبين شال يناسب مع هاي؟	Aram	يتناسب	بلبق	إيشارب	شال			MSA
14500	corpus-6-test-corpus-26-test	و هو كذلك . سأمر عليك و آخذك بالسيارة من الفندق الذي تقيم فيه في الساعة الثامنة .	و هو هيك . رح أمر عليك و اخذك بالسيارة من الفندق اللي إنت قاعد فيه عالساعة ثمنية.	و هو هيك بالضبط. رح اجي عندك و اخذك بالسيارة من الفندق اللي انت فيه الساعة الثامنة.	Aram	تقيم	قاعد	ثامنة	ثمنية			MSA
10497	corpus-6-test-corpus-26-train	هل لديكم كتيب حول العروض ؟	عندكم كتالوج على العروض؟	عندكم كتالوج على العروض؟	Aram							MSA
4889	corpus-6-test-corpus-26-train	أظهر هذا المبنى معنا , من فضلك .	بين هاظ المبنى معنا، لو سمحت.	ورينا هالمبنى , لو سمحت .	Aram	أظهر	بين
13624	corpus-6-test-corpus-26-train	هل لديك خريطة لمترو الأنفاق ؟	عندك خريطة للمترو؟	عندك خريطة للمترو؟	Aram	لديك	عندك					MSA
2748	corpus-6-test-corpus-26-train	أين بيان أمتعة الرحلة سبعة صفر ثلاثة ؟	وين استلام شناتي الرحلة رقم سبعة صفر ثلاثة؟	وين البيان عن أمتعة الرحلة السبعة صفر ثلاثة؟	Aram	بيان	استلام
18639	corpus-6-test-corpus-26-train	طلبت دجاجا .	طلبت جاج.	طلبت دجاج.	Aram	دجاج	جاج					MSA
3628	corpus-6-test-corpus-26-train	إنها صغيرة الجسم وذكية .	هي صغيرة الحجم و ذكية.	هية صغيرة الحجم وشاطرة.	Aram	جسم	حجم
11493	corpus-6-test-corpus-26-train	هل يمكن أن تمرر لي الملح ؟	بتقدر تعطيني الملح؟	بتقدر تعطيني الملح؟	Aram							MSA
2412	corpus-6-test-corpus-26-dev	لدينا بيرة ، وويسكي ، وبراندي ، وجن ، وفودكا ، وخمر .	عنا بيرا، ويسكي، براندي، جن، فوديكا وواين.	عندنا بيرة، ويسكي، وبراندي، وجن، وفودكا، وعرق.	Aram	فودكا	فوديكا
5492	corpus-6-test-corpus-26-train	وصلت الطائرة متأخرة بسبب الثلج الكثيف .	وصلت الطيارة متأخرة عشان الثلج كان كثيف.	وصلت الطيارة متأخرة بسبب كتير الثلج.	Aram	بسبب	عشان
18872	corpus-6-test-corpus-26-train	لا ، ليس هنا . هناك حجرة تدخين قرب مؤخرة هذه الحافلة .	لا، مش هون. في غرفة تدخين قريبة بآخر هاذ الباص.	لا، مش هون. في غرفة دخان قريبة من آخر هاي الباص.	Aram	مؤخرة	آخر	حجرة	غرفة			MSA
18336	corpus-6-test-corpus-26-test	متي يغلق مكتب البريد أبوابه ؟	متى بيسكر مكتب البريد ؟	إمتى بيسكر مكتب البريد ؟	Aram	يقلق	بسكر	أبوابه	بوابه			MSA
2052	corpus-6-test-corpus-26-train	اقتحمت غرفتي الليلة الماضية .	في حدا اقتحم غرفتي مبارح بالليل.	دخلت على غرفتي الليلة اللي فاتت.	Aram	ماضية	مبارح
14224	corpus-6-test-corpus-26-train	اشتراها الآن فقط .	شتراها هسه بس.	شتراها هسه بس.	Aram	فقط	بس	الآن	هسا			MSA
15710	corpus-6-test-corpus-26-train	هل هذا للأعضاء فقط ؟	هاظا للأعضاء بس ؟	هادا للأعضاء بس ؟	Aram	هذا	هاظا					MSA
493	corpus-6-test-corpus-26-train	هل عشرة دولارات ستكون كافية للذهب بالتاكسي ؟	بكفي عشر دولرات للروحة بالتكسي؟	بتكفي عشرة دولارات لنروح بالتاكسي؟	Aram	ذهاب	روحة	تاكسي	تكسي
6484	corpus-6-test-corpus-26-dev	أود شريطاً للآلة الكاتبة .	بدي شريط للآلة كاتبة.	بدي شريط لآلة الكتابة.	Aram
19649	corpus-6-test-corpus-26-train	آسف الحمام به عطل . أحتاج للمساعدة .	آسف، الحمام فيه عطل. بحتاج للمساعدة.	معذرة، الحمام عندنا معطل. بحتاج للمساعدة.	Aram	به	فيه					MSA
18784	corpus-6-test-corpus-26-train	ما هو تخصص هذا المطعم ؟	بشو متخصص هاذ المطعم	شو الاشي اللي هالمطعم بيشتهر فيه؟	Aram							MSA
18344	corpus-6-test-corpus-26-train	هل يمكنني أن أحول أموال إلى حساب المدخرات الخاص بي ؟	ممكن احول مصاري لحساب التوفير تاعي؟	ممكن أنقل فلوس على حسابي الادخاري؟	Aram	أموال	مصاري	مدخرات	توفير			MSA
3667	corpus-6-test-corpus-26-train	حسناً ، إذن , ربما سننسجم مع بعضنا .	طيب، يعني ، ممكن نرتاح لبعض .	ممتاز، يعني, يمكن نتفاهم مع بعض.	Aram	ننسجم	نرتاح	إذن	يعني
5017	corpus-6-test-corpus-26-train	لقد تقابلنا بالصدفة لعدة مرات ، أليس كذلك ؟	تقابلنا بالصدفة عدة مرات ، مش هيك؟	صارلنا انلاقي بالصدفة بضع مرات، مو صح؟	Aram
12056	corpus-6-test-corpus-26-train	إن لونها لا يروقني على الإطلاق . هلي يمكنني إرجاعها ؟	لونها مش عاجبني ابداً. ممكن أرجعها؟	لونها مش عاجبني ابداً. ممكن أرجعها؟	Aram							MSA
11631	corpus-6-test-corpus-26-train	حسنا ، هيا نذهب . أستطيع مساعدتك في واجبك المنزلي بعد أن نتناول بعض البيتزا .	ماشي ، يلا نروح. بقدر اساعدك بواجبك المدرسي بعد ما نكل بيتزا شوي.	ماشي ، يلا نروح. بقدر اساعدك بواجبك المدرسي بعد ما نكل بيتزا شوي.	Aram							MSA
16465	corpus-6-test-corpus-26-train	لماذا لا ننتظر الحافلة تحت التندة ؟	ليش ما نستنى الباص تحت المظلة ؟	ليش ما نستنى الباص تحت الباصة ؟	Aram	تندة	مظلة					MSA
12671	corpus-6-test-corpus-26-train	تسعة وتسعون دولاراً في الساعة للطفل ؟	تسعة وتسعين دولار بالساعة للطفل ؟	تسعة وتسعين دولار بالساعة للطفل ؟	Aram							MSA
11959	corpus-6-test-corpus-26-train	ما هي أحدث ألعاب الكمبيوتر لفتى سنه خمسة عشر عاما ؟	شو أحدث ألعاب الكمبيوتر لولد عمرو خمسة عشر سنة؟	شو أحدث ألعاب الكمبيوتر لولد عمرو خمسة عشر سنة؟	Aram							MSA
11646	corpus-6-test-corpus-26-train	الغد يوم آخر .	بكرا يوم تاني.	بكرا يوم تاني.	Aram							MSA
16130	corpus-6-test-corpus-26-test	أجل , سيدي . آتي هنا للإفطار كل يوم , من الاثنين حتى الجمعة , قبل الذهاب للعمل .	أكيد, يا سيدي. بآجي هون عشان الفطور كل يوم, من الاثنين للجمعة، قبل ما أروح على الشغل.	أكيد, يا سيدي. أجي هون عشان أتروق كل يوم, من الاتنين للجمعة، قبل ما أروح على الشغل.	Aram	آتي	بآجي	إفطار	فطور			MSA
1139	corpus-6-test-corpus-26-train	نحن محظوظون جداً . لديهم واحدة مقاس أربعة فى متجر ألامونا .	إحنا كثير محظوظين. في عندهم وحدة مقاسها أربعة بمحل ألاموانا.	احنا محظوظين كتير. عندهم وحدة مقاس اربعة بالمحل عند امونا.	Aram	متجر	محل	لديهم	عندهم
12936	corpus-6-test-corpus-26-train	ماذا تعمل في المعتاد بالمنزل بعد تناول العشاء ؟	شو بتعمل بالعادة بالبيت بعد ما تتعشى؟	شو بتعمل عادة بالبيت بعد ما تتغدى؟	Aram	منزل	بيت	معتاد	عادة			MSA
19902	corpus-6-test-corpus-26-train	عيد الدستور أو " كيمبو كينينبي " عطلة قومية في الثالث من مايو للاحتفال بذكرى وضع الدستور الياباني الحالي .	عيد الدستور او "كيمبو كينينبي" هو عطلة وطنية بتاريخ ثلاثة خمسة للإحتفال بذكرى الدستور الياباني الحالي.	عيد الدستور او "كيمبو كينينبي" هو عطلة رسمية بالأردن يوم التلات من مايو للإحتفال بذكرى الدستور الياباني الحالي.	Aram	قومية	وطنية					MSA
5219	corpus-6-test-corpus-26-train	أود إجراء مكالمة هاتفية باستخدام بطاقة ائتمان .	بدي أعمل مكالمة عن طريق الفيزا.	بدي أعمل مكالمة تلفونية وبرد بالكريديت كارد.	Aram	باستخدام	عن طريق
5104	corpus-6-test-corpus-26-test	إنها بين المخبز ومحل الجزارة .	موجودة بين المخبز والملحمة.	هي بين الفرن ومحل الجزار.	Aram	محل الجزارة	ملحمة
683	corpus-6-test-corpus-26-train	هل بإمكانك أن تخبرني متى نصل إلى مجمع الخدمات العامة .	بتقدر تحكيلي أميت رح نوصل على مجمع الخدمات العامة .	ممكن تحكيلي إمتى بنوصل للمجمع العام خدمات؟	Aram	متى	أميت
9494	corpus-6-test-corpus-26-test	الملابس الطويلة هي الموضة الآن .	الأواعي الطويلة هي الموظا هسا.	الألبسة الطويلة هي الأزياء هسا.	Aram	ملابس	أواعي	موضة	موظا
10593	corpus-6-test-corpus-26-train	هذا جيد للغاية . والآن الأسئلة ، من فضلك .	هاي زينة كتير. هسا الأسئلة، لو سمحت.	هاي زينة كتير. هسا الأسئلة، لو سمحت.	Aram							MSA
3847	corpus-6-test-corpus-26-train	أنا خارج الآن . لذلك سآخذها .	أنا طالع هسا، لهيك راح أوخذها.	أنا برا هلا. فبدي أخدها.	Aram	لذلك	لهيك	خارج	طالع
10753	corpus-6-test-corpus-26-test	هل يمكن أن أرجع ظهر مقعدي إلى الخلف ، من فضلك .	بتقدر تدير ظهر كرسيي لورا، لو سمحت؟	بتقدر تدير ظهر كرسيي لورا، لو سمحت؟	Aram							MSA
16928	corpus-6-test-corpus-26-dev	لا أستطيع أن أجدها في أي مكان .	مش قادر ألاقيها بأي مكان.	مش قادر ألاقيها بأي مكان.	Aram	أجدها	ألاقيها					MSA
708	corpus-6-test-corpus-26-train	ما اسم هذه الوردة ؟	شو اسم هاي الوردة؟	شو اسم هالوردة ؟	Aram	هذه	هاي
16869	corpus-6-test-corpus-26-train	هل تريد أن يأتي أحد ليأخذك من المطار ؟	بدك حدا يجي يوخذك من المطار؟	بدك حدا يجي ياخذك من المطار؟	Aram	أحد	حدا	يأتي	يجي			MSA
3279	corpus-6-test-corpus-26-train	أريد ساعة مستعملة .	بدي ساعة مستعملة.	بدي ساعة مستعملة.	Aram	أريد	بدي
50	corpus-6-test-corpus-26-train	هل تحب أن تضع قشدة وسكر في قهوتك ؟	بتحب تحط كريمة و سكر مع قهوتك ؟	بتحب تحط قشطة وسكر بقهوتك؟	Aram	قشدة	كريمة	تضع	تحط
7684	corpus-6-test-corpus-26-dev	شكراً . مرحباً ، شكراً لانتظارك .	شكراً الك. مرحبا، شكراً لأنك استنيت.	شكرا. هلا والله، شكرا على صبرك.	Aram	مرحباً	مرحبا
15664	corpus-6-test-corpus-26-train	أنا مريض .	أنا مريض.	أنا مريض.	Aram							MSA
9481	corpus-6-test-corpus-26-train	متى يأتي القطار التالي المتجه إلى واشنطن العاصمة ؟	متى بوصل القطار الجاي اللي رايح لواشنطن العاصمة؟	إمتى رح يجي القطار الجاي اللي بيروح على واشنطن العاصمة؟	Aram	متجه	رايح
8947	corpus-6-test-corpus-26-train	مقلية على الجانبين ، من فضلك .	مقلي من الجهتين، لو سمحت.	مقلية من الطرفين, لو سمحت.	Aram	جانبين	جهتين
4503	corpus-6-test-corpus-26-train	هل تريد أي مساعدة ؟	بدك أي مساعدة؟	بدك أي مساعدة؟	Aram	تريد	بدك
4845	corpus-6-test-corpus-26-train	إنني ذاهب إلى باريس .	أناي رايح على باريس.	أنا طالع على باريس.	Aram	ذاهب	رايح
15024	corpus-6-test-corpus-26-dev	لم أقرر بعد . هل لك أن تعطيني وقتاً أكثر ؟	بعدني ما قررت. ممكن تعطيني وقت زيادة؟	لسات ما قررت. ممكن تعطيني وقت زيادة؟	Aram	لم	ما	أكثر	زيادة			MSA
2871	corpus-6-test-corpus-26-train	عذراً . دعني أخرج ، من فضلك .	عفوا. خليني أطلع، لو سمحت.	معلش، خليني أطلع، لو سمحت.	Aram	أخرج	أطلع	دعني	خليني
9829	corpus-6-test-corpus-26-train	هاي ، كتاب كوميدي ماليزي . سأشتري واحداً لآخذه إلى المنزل كقطعة محادثة .	هاي، كتاب ماليزي كوميدي. راح أشتري واحد عشان آخذه على الدار مثل كتاب محادثة.	هاي ، كتاب مضحك ماليزي. راح أشتري واحد عشان أوخذه البيت عشان يكون حكي فاضي.	Aram	المنزل	الدار
19819	corpus-6-test-corpus-26-train	أين يمكنني أداء الإجراءات الرسمية ؟	وين ممكن أساوي الإجراءات الرسمية؟	وين ممكن أعمل الأمور الرسمية؟	Aram	أداء	أساوي					MSA
14088	corpus-6-test-corpus-26-train	سر للأمام إلى آخر هذه القاعة وانعطف يسارا عند الركن . سوف تجدها على يمينك .	إمشي لقدام لاخر هالصالة ولف شمال عند الركن. بتلاقيها على يمينك.	امشي على جدام لاخر هالصالة واشتلف شمال عند الركن. حتلاقيها على يمينك.	Aram	قاعة	صالة	سر	إمشي			MSA
11913	corpus-6-test-corpus-26-dev	هل يمكن أن تتصلوا بي إن عثرتم على حقيبتي ؟	ممكن تحكوا معي لو لقيتوا شنطتي؟	ممكن تحكوا معي لو لقيتوا شنطتي؟	Aram							MSA
7270	corpus-6-test-corpus-26-train	أي طريق يؤدي إلى مكتب البريد المركزي ؟	اي طريق بودي لمكتب البريد المركزي؟	أي طريق بوصل لمكتب البريد الرئيسي؟	Aram	يؤدي	بودي
17350	corpus-6-test-corpus-26-train	لقد تعرضت لعملية سلب .	انسرقت .	صار معي سلب.	Aram	سلب	سرقة					MSA
17068	corpus-6-test-corpus-26-dev	كان الشارع مزدحماً بالسيارات .	كان الشارع مليان سيارات.	كان الشارع مليان سيارات.	Aram	مزدحم	مليان					MSA
16453	corpus-6-test-corpus-26-train	إنه مريب .	هاذ مشكوك فيه.	هاذ مش طبيعي.	Aram	مريب	مشكوك					MSA
16169	corpus-6-test-corpus-26-test	يالها من خدمة سريعة !	شو هاي الخدمة السريعة!	شو هاي الخدمة السريعة!	Aram							MSA
15509	corpus-6-test-corpus-26-train	تؤلمني معدتي أحياناً .	بتوجعني معدتي مرات.	بتوجعني معدتي هيك و بعض الأحيان.	Aram	أحياناً	مرات	تؤلمني	بتوجعني			MSA
14402	corpus-6-test-corpus-26-train	نريد غرفة في الخلف .	بدنا غرفة من ورا.	بدنا غرفة بالخلف.	Aram	خلف	ورا					MSA
16709	corpus-6-test-corpus-26-train	لم يكن لدي هذا الطبق .	ما كان عندي هاظا الصحن.	ما كان عندي هالطبق.	Aram	طبق	صحن	يكن	كان			MSA
3267	corpus-6-test-corpus-26-test	هل يوجد دار للسينما بالقرب من هنا ؟	في سينيما قريبة من هون؟	في سينما حوالي هون؟	Aram	هنا	هون
4432	corpus-6-test-corpus-26-dev	من فضلك ، أريد أن أخذ نفس الدورة غدا .	لو سمحت ، بدي آخذ نفس الدورة بكرا.	من فضلك، بدي اخد هاي الدورة بكرة.	Aram	غدا	بكرا
7991	corpus-6-test-corpus-26-dev	اسمي كيمورا . أريد إلغاء حجزي الخاص بيوم الجمعة .	اسمي كيمورا. بدي ألغي حجزي تاع يوم الجمعة.	اسمي كيمورا. بدي ألغي حجزي ليوم الجمعة.	Aram	الخاص ب	تاع
11336	corpus-6-test-corpus-26-dev	اشعر ببرودة وتؤلمني معدتي جداً .	ماسكني برد ومعدتي عم توجعني كتير.	ماسكني برد ومعدتي عم توجعني كتير.	Aram							MSA
12679	corpus-6-test-corpus-26-train	أريد مفتاح الغرفة خمسة صفر ثلاثة ، من فضلك .	بدي مفتاح الغرفة خمسة صفر تلاتة، لو سمحت.	بدي مفتاح الغرفة خمسة صفر تلاتة، لو سمحت.	Aram							MSA
16516	corpus-6-test-corpus-26-train	هل لي بخريطة لطرق المدينة ؟	ممكن خريطة لطرق المدينة؟	ممكن خريطة لشوارع المدينة؟	Aram							MSA
1768	corpus-6-test-corpus-26-dev	لا , أريد أن استأجر نصف مجموعة من المضارب وزوجا من الأحذية .	لا، بدي استأجر نص مجموعة من المضارب وجوز بواط.	لا, بدي أكرّر نصف دستة مضارب وزوج أحذية.	Aram	أحذية	بواط	زوج	جوز
13635	corpus-6-test-corpus-26-train	عندي ألم في عيني اليمنى .	عندي وجع بعيني اليمين.	عندي وجع بعيني اليمينة.	Aram	يمنى	يمين					MSA
7269	corpus-6-test-corpus-26-test	بالطبع لا . لماذا تقول إذا ؟	طبعاً لأ. ليش بتحكي لعاد؟	طبعا لأ. ليش حكيت هيك ؟	Aram	بالطبع	طبعاً	لماذا	ليش
723	corpus-6-test-corpus-26-train	ليس هناك صابون في حجرتي .	فيش صابون بغرفتي .	ما في صابون بغرفتي.	Aram	ليس هناك	فيش	حجرتي	غرفتي
19007	corpus-6-test-corpus-26-train	معذرة . أين المطعم الرئيسي ؟	عفواً . وين المطعم الرئيسي؟	معذرة, وين المطعم الرئيسي؟	Aram	أين	وين					MSA
19547	corpus-6-test-corpus-26-train	كم فاتورة الحساب ؟	قديش الفاتورة ؟	أديش الفاتورة ؟	Aram							MSA
4588	corpus-6-test-corpus-26-train	عانيت من ألم في الرقبة أثناء نومي ؟	صارت رقبتي توجعني وأنا نايم.	عانيت من وجع بالعنق وأنا نايم؟	Aram	نائم	نايم
18492	corpus-6-test-corpus-26-train	اجمعهم عند البوابة .	جمعهم عند البوابة.	جمعهم عند البوابة.	Aram	اجمع	جمع					MSA
446	corpus-6-test-corpus-26-train	لعدة أيام قليلة .	لكم يوم بس.	لعدة أيام قليلة.	Aram	عدة	كم
15201	corpus-6-test-corpus-26-train	أين يوجد أقرب متجر لأجهزة الكمبيوتر ؟	وين أقرب محل لأجهزة الكمبيوتر ؟	وين أقرب دكان لأجهزة الكمبيوتر ؟	Aram	متجر	محل					MSA
6553	corpus-6-test-corpus-26-train	أود أن أؤجر قارب بمحرك .	بدي استأجر قارب سريع.	بدي أكري زورق ماتور.	Aram	أؤجر	استأجر
6917	corpus-6-test-corpus-26-train	هل يمكن أن أحجز خمسة مقاعد في الصف نفسه .	ممكن أحجز خمس مقاعد بنفس الصف؟	ممكن أحجز خمس مقاعد بنفس الصف؟	Aram
2235	corpus-6-test-corpus-26-train	هل لديك كعب ؟	عندك كعب؟	عندك كعب؟	Aram	لديك	عندك
1074	corpus-6-test-corpus-26-train	شكراُ لك . كم تكلفة هذا القفاز ؟	شكراً الك. قديش سعر هاي الكفوف؟	مشكور. بكم هاد القفاز؟	Aram	قفاز	كفوف
10156	corpus-6-test-corpus-26-train	أين غرف الراحة ؟	وين الحمامات؟	وين الحمامات؟	Aram
12755	corpus-6-test-corpus-26-dev	هناك طفح على ذراعي .	في طفح على إدي.	في طفح على إدي.	Aram							MSA
10408	corpus-6-test-corpus-26-train	سوف استخدم ما يوجد عندكم .	رح استخدم اللي موجود عندكو.	رح استعمل اللي عندكم.	Aram	ما	اللي	عندكم	عندكو
1718	corpus-6-test-corpus-26-train	راكب آخر هناك قال انهم يستطيعون أن يبدلوا مقاعدهم معك .	في راكب ثاني هناك قال انه بقدروا يبدلوا الكراسي معك.	راكب تاني هنيك حكالي انهم بيقدروا يبدلوا مكانهم معك.	Aram	مقاعد	كراسي	آخر	ثاني
8094	corpus-6-test-corpus-26-train	إنه صندوق موسيقى .	هاذ صندوق موسيقى.	هاي علبة موسيقى.	Aram	إنه	هاذ
5956	corpus-6-test-corpus-26-train	متى تغلقون ؟	متى بتسكرو؟	إمتى بتسكروا؟	Aram	تغلقون	بتسكروا
15699	corpus-6-test-corpus-26-train	أجل . استقل الحافلة التي تذهب إلى محطة كيوتو .	أها، اركب الباص اللي بيروح على محطة كيوتو.	أها، ركب الباص اللي بيروح على محطة كيوتو.	Aram	استقل	اركب					MSA
157	corpus-6-test-corpus-26-train	صباح الخير . كيف حالك .	صباح الخير . شلونك .	صباح النور. شلونك؟	Aram	كيف حالك	شلونك
4285	corpus-6-test-corpus-26-test	المزيد من المستردة ، من فضلك .	كثرلي ماسترد، لو سمحت.	زيدني مستردة، لو سمحت.	Aram	مستردة	ماسترد
13831	corpus-6-test-corpus-26-train	أريد أن أركب في سيارة رياضية .	بدي أطلع بسيارة سبايدر.	بدي أركب بسيارة رياضية.	Aram					سيارة رياضية : سبايدر		MSA
2851	corpus-6-test-corpus-26-dev	هل يمكنني أن أدعوك للعشاء في الخارج وقتاً ما ؟	بقدر اعزمك على العشا برا يوماً ما؟	ممكن أعزمك على عشا برة يوم من الأيام؟	Aram	الخارج	برا	أدعوك	اعزمك
16046	corpus-6-test-corpus-26-train	لقد اتصلت بالسيد سميث في غرفة رقم اثنان صفر واحد منذ لحظات ، لكن لم يرد أحد . هل لك أن ترى هل لا يزال يقيم هنا ؟	رنيت عالسيد سميث بالغرفة اللي رقمها 201 قبل شوي ، بس ما حدا رد. بتقدر تشوف اذا بعدو قاعد هون؟	سويت كول للأستاذ سميث بالغرفة اللي رقمها 201 قبل شوي ، بس ما حدا رد. تقدر تشوف اذا بعدو ساكن هون؟	Aram	اتصلت	رنيت	لحظات	شوي			MSA
4335	corpus-6-test-corpus-26-train	يمكن أن أحضر في الساعة الثانية .	ممكن آجي على الساعة ثنتين.	بقدر أجي الساعة الثنية.	Aram	الثانية	ثنتين	أحضر	آجي
15262	corpus-6-test-corpus-26-train	أشعر بمرض شديد .	بحس حالي مريض كثير.	بحس حالي مريض كثير.	Aram	أشعر	بحس	شديد	كثير			MSA
13553	corpus-6-test-corpus-26-train	لقد أصيب شخص .	انصاب عنا واحد.	صار عنا واحد انصاب.	Aram	شخص	واحد	أصيب	انصاب			MSA
6832	corpus-6-test-corpus-26-train	صديقي مصاب .	صاحبي انصاب.	صاحبي مريض.	Aram	صديفي	صاحبي	مصاب	انصاب
261	corpus-6-test-corpus-26-train	عندما تصل هناك أسأل شخص آخر ، من فضلك .	لما توصل هناك، اسأل حدا ثاني، لو سمحت.	لما توصل هنيك، اسأل حدا تاني، لو سمحت.	Aram	شخص	حدا	تصل	توصل
9732	corpus-6-test-corpus-26-train	هل يمكنني الحصول على طوابع بريدية لثلاث بطاقات بريدية جوية لليابان ؟	ممكن أوخذ طوابع بريد لثلث رسايل بالبريد الجوي على اليابان؟	بتقدر تعطيني طوابع بريد لثلاث بطاقات بريد جوية لليابان؟	Aram	رسائل	رسايل
7416	corpus-6-test-corpus-26-test	سأعد سندوتشين من لحم فخذ الخنزير .	بدي اعمل سندويشتين من لحمة فخدة الخنزير.	راح أعمل سندوتشتين من لحم رجل الخنزير.	Aram	فخذ	فخدة	أعد	أعمل
10336	corpus-6-test-corpus-26-dev	رقم الرحلة اثنان صفر ثمانية ، إلى طوكيو .	رحلة رقم اثنين صفر ثمنية، لطوكيو.	رقم الرحلة اتنين صفر ثمانية، على طوكيو.	Aram	إلى	ل
2147	corpus-6-test-corpus-26-train	أين يمكنني أن أشتري طوابع بريد ؟	من وين بقدر أشتري طوابع بريد؟	وين ممكن اشتري طوابع بريد؟	Aram	أين	من وين
8338	corpus-6-test-corpus-26-train	أين يمكنني الحصول على أسبرين ؟	من وين بقدر أجيب أسبيرين؟	وين بقدر الاقي اسبرين؟	Aram	أحصل	أجيب
3238	corpus-6-test-corpus-26-train	من الأفضل أن تستقل قطار الثامنة والنصف .	الأفضل إنك تطلع بقطار الساعة ثمنية ونص.	أحسنلك تركب القطار اللي بالثمنة والنص.	Aram	تستقل	تطلع
5594	corpus-6-test-corpus-26-dev	هل لديك واحدة أخرى ؟	عندك واحدة ثانية؟	عندك وحدة ثانية؟	Aram	لديك	عندك
11541	corpus-6-test-corpus-26-train	الكثير جداً من التمارين يضر بك .	كتير كتير من التمرين بيضر فيك.	كتير كتير من التمرين بيضر فيك.	Aram							MSA
7233	corpus-6-test-corpus-26-dev	هل تستطيع أن تتصل بي في الصباح الباكر ، من فضلك ؟	بتقدر تتصل في الصبح بكير، لو سمحت؟	ممكن تحكي معي بالصبح الباكر، لو سمحت؟	Aram	بي	فيّ
15989	corpus-6-test-corpus-26-train	أين السوق ؟	وين السوق؟	وين السوق؟	Aram							MSA
12391	corpus-6-test-corpus-26-test	من أين يسعني شراء تذكرة توصيل بالكوبون ؟	من وين بقدر اشتري تذكرة توصيل بالكوبون؟	من وين بقدر اشتري تذكرة توصيل بالكوبون؟	Aram							MSA
3359	corpus-6-test-corpus-26-train	شكراً على كرم ضيافتك .	شكراً الك على حسن الضيافة.	مشكور على طيب استقبالك.	Aram	كرم	حسن
6472	corpus-6-test-corpus-26-train	كم ثمن إيجار نصف يوم للوحة ؟	قديش بكلف استئجار سفينة لمدة نص يوم؟	أديش كلفة إيجار نص يوم للوحة؟	Aram	إيجار	اسئجار
1436	corpus-6-test-corpus-26-train	نعم , لا بد أن يكون عندك رخصة قيادة ، ولا بد أن تحصل على رخصة من لجنة التاكسي والليموزين .	اه، لازم يكون عندك رخصة سواقة، ولازم يكون توخذ رخصة من لجنة التكسي و ليموزين.	ايوه, لازم يكون عندك رخصة سواقة, وكمان لازم تاخذ رخصة من لجنة تاكسي والليموزين.	Aram	لا بد	لازم	قيادة	سواقة
13487	corpus-6-test-corpus-26-train	لعد تعهدت لنفسي بأنني سوف أتعرف عليك عندما أراك .	وعدت حالي انه رح أعرفك لما بشوفك.	وعدت حالي انه رح بتعرف عليك لما بشوفك.	Aram	تعهدت	وعدت	نفسي	حالي			MSA
3640	corpus-6-test-corpus-26-train	مقلي من فضلك .	مقلي، لو سمحت.	مقلية لو سمحت.	Aram
703	corpus-6-test-corpus-26-train	نرغب في أن نقيم أربع ليالي بدءاً من أول أغسطس .	إحنا حابين نظل أربع ليالي من واحد ثمنية.	بدنا نقعد أربع ليالي بلشة من أول آب.	Aram	نقيم	نظل	نرغب	حابين
401	corpus-6-test-corpus-26-dev	هذا القطار يتوقف في لاك فورست , أليس كذلك ؟	هاذ القطار بوقف عند بحيرة الغابة. مش هيك؟	هاد القطار بوقف بلاك فورست , مو صح؟	Aram	أليس	مش	يتوقف	بوقف
4658	corpus-6-test-corpus-26-train	شكراً لك على الانتظار ، يا أستاذه مكجوير . هاك هو . امض من فضلك .	شكراً لإنك استنيتي، آنسة مكجوير. هيو هون. وقعي لو سمحتي.	مشكور كتير عالاستنى، يا تيتشر مكجوير. تفضل هينا، تحرك بهالطريق لو سمحت.	Aram	امض	وقع	أستاذة	آنسة
1525	corpus-6-test-corpus-26-train	ما رقم البوابة ؟	شو رقم البوابة؟	شو رقم البوابة؟	Aram	ما	شو
7976	corpus-6-test-corpus-26-train	نعم ، رجاءً املأ هذه الاستمارة .	نعم، يا ريت تعبي هاي الاستمارة.	إيوه ، لطفاً املي هالاستمارة.	Aram	رجاءً	يا ريت	املأ	تعبي
12820	corpus-6-test-corpus-26-train	في البداية نود مشاهدة وول ستريت .	بالأول، بدنا نتفرج على وول ستريت.	بالأول، بدنا نتفرج على وول ستريت.	Aram							MSA
12546	corpus-6-test-corpus-26-train	إن طفلي قد أصابه الإعياء الشديد .	طفلي صار مرهق كثير.	طفلي صار مرهق كثير.	Aram							MSA
14373	corpus-6-test-corpus-26-dev	هل غرفتك تطل على المدينة ؟	بتطل غرفتك على البلد؟	بتطل غرفتك على البلد؟	Aram	مدينة	بلد					MSA
12556	corpus-6-test-corpus-26-train	هذا الجاكت ليس مقاسي .	هاي الجاكيت مش مقاسي.	هاي الجاكيت مش مقاسي.	Aram							MSA
16477	corpus-6-test-corpus-26-train	تعالى ، كينجي . دعني أريك أرجاء المكتب .	تعال ، كينجي . خليني أوريك حوالين المكتب .	تعال ، كينجي . خليني أوريك حوالين المكتب .	Aram	أريك	أوريك	أرجاء	حوالين			MSA
4983	corpus-6-test-corpus-26-train	أريد بعض الألياف الصناعية .	بدي شوية ألياف اصطناعية.	بدي شوية ألياف صناعية.	Aram
17797	corpus-6-test-corpus-26-train	أود أن أرسل ذلك إلى اليابان بالبريد الجوي .	بدي أودي هاي لليابان بالبريد الجوي.	بدي أبعت هاي لليابان بالبريد الجوي.	Aram	أرسل	أودي					MSA
1788	corpus-6-test-corpus-26-train	ما اسم هذه المحمية ؟	شو اسم هاي المحمية؟	شو اسم هاي المحمية؟	Aram
10955	corpus-6-test-corpus-26-test	من فضلك قل له أنني أنتظر مكالمته .	من فضلك قللو أني باستنا زنغته.	من فضلك قللو أني باستنا زنغته.	Aram							MSA
17674	corpus-6-test-corpus-26-train	أود أن تبقي تحت مائة وثمانين دولار .	بدي ياها تظل تحت المية وثمانين دولر.	بدي ياها تضل تحت المية وتمانين دولار.	Aram	تبقى	تظل					MSA
9866	corpus-6-test-corpus-26-dev	سأصل إلى فندقكم في حوالي الساعة التاسعة مساءاً .	راح أوصل لفندقكم حوالي الساعة تسعة بالليل.	رح وصل لفندقكم حوالي التاسعة بالليل.	Aram	مساء	بالليل
13547	corpus-6-test-corpus-26-train	خذ هذا الدواء بعد كل وجبة عندما يزداد الألم .	أخذ هاظا الدوا بعد كل وجبة لما يزيد الوجع.	خذ هالدوا بعد كل أكلة لما يزيد الوجع.	Aram	ألم	وجع	يزداد	يزيد			MSA
16351	corpus-6-test-corpus-26-train	من فضلك غير مقعدي .	لو سمحت غير مقعدي.	من فضاك غير مكاني.	Aram							MSA
5261	corpus-6-test-corpus-26-train	هل لي أن آخذ بطانية ووسادة ؟	ممكن آخذ حرام و مخدة ؟	ممكن أخذ بطانية ووسادة؟	Aram	بطانية	حرام	وسادة	مخدة
3402	corpus-6-test-corpus-26-train	هل تعرف أي أماكن جيدة لمشاهدتها في شيكاجو ؟	بتعرف أي أماكن حلوة نشوفها بشيكاغو؟	بتعرف مواضع حلوة نشوفها في شيكاجو ؟	Aram	جيدة	حلوة
14232	corpus-6-test-corpus-26-train	سوف أحضر واحدة في الحال .	راح أجيب وحدة مباشرة.	راح أجيب وحدة هسا.	Aram	أحضر	أجيب	في الحال	مباشرة			MSA
19648	corpus-6-test-corpus-26-dev	أريد مقعداً جيداً .	بدي مقعد زين.	بدي مقعد زين.	Aram							MSA
10975	corpus-6-test-corpus-26-train	آسف . الحجز كامل لمساء الغد .	معذرة. الحجز متكدس لبكرا الليل.	معذرة. الحجز متكدس لبكرا الليل.	Aram							MSA
19722	corpus-6-test-corpus-26-train	هل يمكنك تسجيل العنوان ورقم الهاتف من أجلي ، من فضلك ؟	ممكن تسجلي العنوان ورقم التلفون عشاني، لو سمحت؟	ممكن تسجلي العنوان ورقم التلفون عشاني، لو سمحت؟	Aram	من أجلي	عشاني					MSA
14605	corpus-6-test-corpus-26-train	أنا ظمآن .	أني عطشان.	أنا عطشان.	Aram	ظمآن	عطشان					MSA
6109	corpus-6-test-corpus-26-test	مقعد ممنوع به التدخين ، من فضلك .	مقعد ممنوع التدخين فيه ، لو سمحت.	كرسي ممنوع يصير تدخن فيه، لو سمحت.	Aram
13262	corpus-6-test-corpus-26-train	هل يمكن أن تنزل السرج ، من فضلك ؟	ممكن تنزل السرج، لو سمحت؟	ممكن تنزل السرج، لو سمحت؟	Aram							MSA
2476	corpus-6-test-corpus-26-train	هل لك أن تطلب منه أن يعاود الاتصال بي ؟	ممكن تخليه يرجع يتصل علي بعدين؟	بتقدر تطلع عليه يرجع يتصل فيني؟	Aram	يعاود	يرجع	تطلب منه	تخليه
13783	corpus-6-test-corpus-26-train	إنه يلائم بزتك .	بناسب سترتك .	بتناسب معلوماتك.	Aram	يلائم	بناسب	بزتك	سترتك			MSA
11100	corpus-6-test-corpus-26-train	تسعون دولاراً لتذكرة الذهاب . نقداً أم بالبطاقة ؟	تسعين دولار على تذكرة الروحة. نقدي أو بالكارت؟	تسعين دولار على تذكرة الروحة. نقدي أو بالكارت؟	Aram							MSA
14969	corpus-6-test-corpus-26-train	أنا من الولايات المتحدة .	أني من أمريكا.	أنا من أمريكا.	Aram					الولايات المتحدة : أمريكا		MSA
3134	corpus-6-test-corpus-26-test	فقدت بطاقة المطالبة .	ضيعت بطاقة الاستلام تبعي.	ضيعت بطاقة الطلب.	Aram	فقدت	ضيعت	مطالبة	استلام
4373	corpus-6-test-corpus-26-train	ليس لدينا حقيبة لمثل هذه الكمية ولذلك سأضعها في هذه الحقيبة البلاستيكية الكبيرة .	ما عنا شنتة توسع كل هاي الكمية عشان هيك راح أحطها بهاي الشنتة البلاستيك الكبيرة .	ما عندنا شنطة لهيك كمية، فلهيك رح أحطها بـ هالشنطة البلاستيك الكبيرة.	Aram	تتسع	توسع	لذلك	عشان هيك
19113	corpus-6-test-corpus-26-train	برصاص أم بدون رصاص ؟	برصاص ولا بدون رصاص	بالرصاصة ولا بلا رصاصة؟	Aram	أم	ولا					MSA
13694	corpus-6-test-corpus-26-train	هل يمكن أن أخذ نصف إبريق ؟	ممكن أوخذ نص بريق؟	ممكن أخذ نصف إبريق؟	Aram	نصف	نص	إبريق	بريق			MSA
3109	corpus-6-test-corpus-26-train	من فضلك أكمل البيانات الناقصة في التقرير .	لو سمحت كمّل البيانات الناقصة في التقرير.	لو سمحت، كمل البيانات الناقصة في التقرير.	Aram	أكمل	كمّل
4346	corpus-6-test-corpus-26-train	هذه هي رحلتي الأولى إلى باريس .	هاي رحلتي الأولى لباريس.	هاي أول مرة بروح فيها على باريس.	Aram
6736	corpus-6-test-corpus-26-train	كان عظيماً . شكراً .	كان مرتب . شكراً الك.	كان زي العسل. مشكور.	Aram	عظيم	مرتب
3742	corpus-6-test-corpus-26-train	كان هذا ممتعاً .	كان هاذا بسلي.	كان هادي ممتع.	Aram	هذا	هاذا	ممتع	بسلي
5657	corpus-6-test-corpus-26-train	عفواً . هلا سمحت لي بالمرور ؟	عفواً. بتسمحلي أمر؟	معذرة، بتسمحلي أدور؟	Aram
10129	corpus-6-test-corpus-26-train	هل سأدفع نقداً أم يضاف على الفاتورة ؟	راح ادفع كاش ولا بنزاد عالفاتورة؟	بدي دفع كاش ولا بيتحط على الفاتورة؟	Aram	يضاف	بنزاد
1792	corpus-6-test-corpus-26-dev	أين يوجد مكان جيد به لمشاهدة الأماكن المهمة ؟	وين في مكان كويس حتى نشوف الاماكن المهمة؟	وين فيه مكان زين أقدر أشوف فيه الأشياء المهمة؟	Aram	جيد	كويس
14043	corpus-6-test-corpus-26-test	من فضلك كررها مرة أخرى ببطء أكثر .	من فضلك عيدها مرة ثانية أبطء شوي.	من فضلك عيد تكرارها مرة ثانية بأبطء شوي.	Aram	ككرها	عيدها	أخرى	ثانية			MSA
6363	corpus-6-test-corpus-26-train	غرفتي أبرد من اللازم .	غرفتي أبرد من اللازم.	اوضتي ابرد من اللازم.	Aram
8368	corpus-6-test-corpus-26-train	هنا واحد .	هون واحد.	هون واحد.	Aram	هنا	هون
12416	corpus-6-test-corpus-26-train	إنه في هذا الطريق في اتجاه الشاطئ .	هوي ع هالشارع طالع على البحر.	هوي ع هالشارع طالع على البحر.	Aram							MSA
9903	corpus-6-test-corpus-26-train	نعم ، نحن تفعل . سأريك بعضاً .	اه، إحنا منعمل. راح أورجيك شوي.	أيوه، احنا بنعمل. راح أوريك شوي.	Aram	بعض	شوي
14495	corpus-6-test-corpus-26-dev	من فضلك لا تعطي هذا المفتاح لأي شخص آخر غيري .	إذا بتسمح ما تنطي هاذ المفتاح لحدا غيري.	من فضلك ما تعطي هالمفتاح لحدا غيري.	Aram	شخص	حدا	تعطي	تنطي			MSA
18585	corpus-6-test-corpus-26-train	من فضلك أرني بعض الساعات الرجالي .	بعد إذنك ورجيني بعض الساعات الرجالي.	من فضلك قليلي بعض الساعات الرجالي.	Aram	أرني	ورجيني					MSA
9581	corpus-6-test-corpus-26-train	لا أشعر براحة . هل يمكنني حني مقعدي ؟	مش مرتاح . بقدر أنزل الكرسي تبعي؟	ما أنا مرتاح. بقدر انكسر مقعدي؟	Aram	حني	أنزل
11171	corpus-6-test-corpus-26-dev	يبدو هذا جيدا ، أين يمكن أن ننتظرك ؟	بتبدو هاي زينة، وين بنقدر نستناك؟	بتبدو هاي زينة، وين بنقدر نستناك؟	Aram							MSA
2982	corpus-6-test-corpus-26-train	هل تغير عملات أجنبية ؟	إنت بتصرف عملات أجنبية؟	بتبدل فلوس أجنبية؟	Aram	تغير	بتصرف
10045	corpus-6-test-corpus-26-train	يجب أن تغير النقود من البنك .	إنت لازم تصرف المصاري من البنك.	لازم تغير الفلوس من البنك.	Aram	تغير	تصرف	نقود	مصاري
4630	corpus-6-test-corpus-26-train	هناك مطاعم كثيرة قريبة من هنا .	في كثير مطاعم بالمنطقة.	فيه محال أكل كتير بالجوار من هون.	Aram
13444	corpus-6-test-corpus-26-train	هل أنت اسكتلندي ؟	إنت سكتلندي ؟	إنت سكتلندي ؟	Aram							MSA
12173	corpus-6-test-corpus-26-train	أشعر بوعكة .	أنا حاسس حالي مريض.	أنا حاسس حالي مريض.	Aram							MSA
3825	corpus-6-test-corpus-26-train	هل يمكنني شرائها معفاة من الضرائب ؟	بقدر اشتريها معفية من الضرايب؟	بقدر اشتريها من غير ما ادفع عليها ضرايب؟	Aram	ضرائب	ضرايب	معفاة	معفية
8202	corpus-6-test-corpus-26-test	هل يجب علىّ أن أترك كل أمتعتي في غرفة ترك المعاطف ؟	لازم أترك كل اغراضي بغرفة الامانات؟	لازم أخلي كل الحوايج تاعتي بالغرفة المختصة للمعاطف؟	Aram	أمتعتي	اغراضي
11449	corpus-6-test-corpus-26-train	هل يمكن أن أنزل عند فندق هيلتون ؟	ممكن أنزل عند فندق هيلتون؟	ممكن أنزل عند فندق هيلتون؟	Aram							MSA
1010	corpus-6-test-corpus-26-train	هذا جيد , من فضلك وقع عليهم . كيف تريدها ؟	هاذ تمام، لو سمحت وقعهم. كيف بتحبها تكون؟	هاي زينة, تكرم ووقّع عليهم. كيف بدك ياها؟	Aram	جيد	تمام	تريدها	بتحبها
1199	corpus-6-test-corpus-26-dev	أود حجز غرفة لأربع ليالى ابتداء من الثانى و العشرين من ديسمبر .	أنا بدي أحجز غرفة لمدة أربع ليالي من اثنين وعشرين إثنعش.	بدي احجز غرفة لأربع ليالي، من تاريخ ٢٢ ديسمبر.	Aram	ديسمبر	إثنعش
19923	corpus-6-test-corpus-26-train	هل ثمة محل قريب لبيع الكتب ؟	في مكتبة بتبيع كتب قريبة؟	فيه محل كتب بالجوار؟	Aram							MSA
8595	corpus-6-test-corpus-26-train	استمتعنا بجولة لطيفة بالسيارة . شكراً لك .	انبسطنا بلفة لطيفة بالسيارة. شكراً الك.	استانسنا بجولة حلوة بالسيارة . مشكور .	Aram
3562	corpus-6-test-corpus-26-test	نحن في انتظار حضور أصدقائنا .	احنا منستني صحابنا يجوا.	احنا عم نستنى حضور ربعنا.	Aram	يحضروا	يجوا	نحن	إحنا
16337	corpus-6-test-corpus-26-train	أريد أن أرى هذا .	بدي أشوف هاظا.	بدي أشوف هاد.	Aram	أرى	أشوف					MSA
6970	corpus-6-test-corpus-26-train	أريد أن أعمل مكالمة مسافة طويلة إلى فندق هيلتون في بوسطن .	بدي أحكي تلفون لمسافة طويلة لعند فندق هيلتون في بوسطن.	بدي أعمل مكالمة بعيدة لفندق الهيلتون ببوسطن.	Aram
8334	corpus-6-test-corpus-26-train	هل عندكم منه بحجم أصغر ؟	عندكو منه سايز أصغر؟	عندكوا منها صغيرة أكتر؟	Aram	عندكم	عندكو			حجم : سايز
16879	corpus-6-test-corpus-26-train	من أين يمكنني شراء بطاقة هاتف ؟	من وين بقدر اشتري كرت تلفون؟	من وين بقدر اشتري كارت تلفون؟	Aram	بطاقة	كرت				هاتف : تلفون	MSA
2055	corpus-6-test-corpus-26-train	أرني السمكة التي رأيتها اليوم في كتاب الصور ، من فضلك .	ورجيني السمكة اللي شفتها اليوم بألبوم الصور، لو سمحت.	وريني السمكة اللي شفتها اليوم بكتاب الصور، تكرم.	Aram	رأيتها	شفتها	أرني	ورجيني	كتاب الصور: ألبوم
15109	corpus-6-test-corpus-26-train	هل معك سجائر ؟	معك دخان؟	عندك سجاير؟	Aram	سجائر	دخان					MSA
1384	corpus-6-test-corpus-26-train	أود أن أرسل فاكس .	بدي أبعث فاكس.	بدي أبعت فاكس.	Aram	أرسل	أبعث
19732	corpus-6-test-corpus-26-train	من أي المطارات سأغادر ؟	من أي مطار رح أطلع؟	من أي مطار رح أطلع؟	Aram	أغادر	أطلع					MSA
13803	corpus-6-test-corpus-26-train	معذرة . هل تعرف نيويورك جيدا ؟	معلش . بتعرف نيويورك مليح ؟	معلش . بتعرف نيويورك منيح ؟	Aram	معذرة	معلش					MSA
18138	corpus-6-test-corpus-26-train	لدي واحدة صغيرة من نفس التصميم .	عندي وحدة صغيرة من نفس التصميم.	عندي وحدة صغيرة من نفس التصميم.	Aram	واحدة	وحدة					MSA
15911	corpus-6-test-corpus-26-train	أمي وأختي قادمتان من اليابان لرؤيتي . سيصلان هنا حوالي السابعة مساءً .	أمي وأختي جايات من اليابان عشان يشوفوني. رح يصلن حوالي الساعة سبعة المسا.	أمي وأختي جايتين من اليابان عشان يشوفوني. رح يوصلو حوالي السابعة بالليل.	Aram	قادمتان	جايات	مساء	مسا			MSA
12247	corpus-6-test-corpus-26-train	متى بالتقريب ستنتهي جولة الحافلة ؟	إمتى تقريبا رح تخلص دورة الباص؟	إمتى تقريبا رح تخلص دورة الباص؟	Aram							MSA
14289	corpus-6-test-corpus-26-train	توقف عند التقاطع القادم .	وقّف عند التقاطع الجاي.	وقّف عند الإشارة الجاية.	Aram	القادم	الجاي	توقف	وقف			MSA
18342	corpus-6-test-corpus-26-train	هل أحتاج إلى أن أرتدي معطف و رابطة عنق ؟	بحتاج ألبس كبوت و قرافة؟	محتاج ألبس معطف و كرفتة؟	Aram	معطف	كبوت			ربطة عنق : قرافة		MSA
7314	corpus-6-test-corpus-26-test	الجو ابرد من المعتاد هذا العام ، لكنه ليس باردا بما يكفى لتساقط الثلج .	الجو أبرد من المعتاد هاي السنة ، بس مش باردة كفاية لحتى تثلج.	الجو أبرد من العادة هالسنة ، بس مش برد كفاية عشان يتراكم الثلج.	Aram	عام	سنة	بما يكفي	كفاية
18077	corpus-6-test-corpus-26-train	لقد سرقت مجوهراتي . أنني بحاجة لتقديم بلاغ .	سرقوا صيغتي . لازم أقدم شكوى.	سرقوا مجوهراتي. لازم اعمل بلاغ.	Aram	بلاغ	شكوى	مجوهراتي	صيغتي			MSA
9229	corpus-6-test-corpus-26-test	هل هناك مضيفات يتحدثن اليابانية ؟	في أي مضيفات بحكن ياباني؟	فيه مضيفات بتحكي ياباني؟	Aram	يتحدثن	بحكن
8827	corpus-6-test-corpus-26-train	مازلت أشعر بالرغبة في القيء .	بعدني حاس حالي بدي أراجع.	لساتني حاسس حالي بدي أتقيأ.	Aram	أتقيأ	أراجع	ما زلت	بعدني
87	corpus-6-test-corpus-26-train	أريد جاكيت للأطفال .	بدي جاكيت للصغار .	بدي جاكيت للصغار.	Aram	أطفال	صغار	أريد	بدي
16964	corpus-6-test-corpus-26-train	حسنا . مثل هذه فسحب .	طيب. زي هاي بس.	طيب. زي هاي الفسحة.	Aram	فحسب	بس	مثل	زي			MSA
14514	corpus-6-test-corpus-26-train	أين مكان تأجير السيارات ؟	وين مكان تأجير السيارات؟	وين مكان إجارة السيارات؟	Aram							MSA
2811	corpus-6-test-corpus-26-dev	هل هذه الحافلة تذهب إلى فندق هيلتون ؟	هاذ الباص بروح لفندق الهيلتون؟	هاي الباص بتروح على فندق الهيلتون؟	Aram	يذهب	بروح
8305	corpus-6-test-corpus-26-train	يبدو أن ثمة مجالات للتحسينات .	شكله في مجال للتحسين.	بيبان إنه في مجالات للتحسينات.	Aram	ثمة	في
13827	corpus-6-test-corpus-26-train	أود زيارة جراح .	بدي اروح عند دكتور جراحة.	بدي اروح عند دكتور عمليات.	Aram	أود	بدي					MSA
2945	corpus-6-test-corpus-26-train	علي أن أمكث هنا الليلة ، أليس كذلك ؟ هل يمكنك مساعدتي حجز غرفة بفندق ؟	لازم أظل هون الليلة، مش هيك؟ بتقدر تساعدني أحجز غرفة بفندق؟	لازم أضل هون الليلة, صح ؟ بتقدر تساعدني أحجز غرفة بفندق؟	Aram	أمكث	أظل	كذلك	هيك
7789	corpus-6-test-corpus-26-test	حسناً ، يا سيدي . من فضلك ابق في غرفتك إلى أن يحضر الطبيب .	طيب، إستاذ. لو سمحت خليك بغرفتك لعند ما يجي الدكتور.	ماشي يا أستاذي. من فضلك خليك بغرفتك لحتى يجي الدكتور.	Aram	سيدي	إستاذ	ابق	خليك
6436	corpus-6-test-corpus-26-train	من فضلك أرني أين أنا على هذه الخريطة .	لو سمحت ورجيني وين أنا موجود على هاي الخريطة.	لو سمحت، دلني وين أنا على هالخريطة.	Aram
9748	corpus-6-test-corpus-26-train	استلقي هنا .	تمدد هون.	شد هون.	Aram	استلقي	تمدد
8840	corpus-6-test-corpus-26-train	الحساب ، من فضلك .	الحساب، لو سمحت.	الحِساب، لو سمحت.	Aram
1218	corpus-6-test-corpus-26-train	أريد تأجير سلاح آلى لمدة يومين .	بدي استأجر سلاح أوتوماتيك ليومين.	بدي أكرر سلاح آلي لمدتين يوم.	Aram					آلي: أوتوماتيك
12172	corpus-6-test-corpus-26-train	أريد غسيلاً للفم .	بدي أغسل حلقي.	بدي أغسل حلقي.	Aram							MSA
3209	corpus-6-test-corpus-26-train	أبحث عن قميص للجري .	بدور عقميص للركض.	بدي دور على قميص للجري.	Aram	جري	ركض	أبحث	بدور
11360	corpus-6-test-corpus-26-train	هل هو مشغول جدا اليوم ؟	هو مشغول كثير اليوم؟	هو مشغول كثير اليوم؟	Aram							MSA
8636	corpus-6-test-corpus-26-train	محفظة بها مائة دولار وبطاقتان ائتمانيتان .	محفظة فيها مية دولار وبطاقتين فيزا.	محفظة فيها مية دولار واثنتين بطاقات ائتمان.	Aram
10032	corpus-6-test-corpus-26-train	أريد كتاب تلوين .	بدي دفتر تلوين.	بدي كتاب تلوين.	Aram	كتاب	دفتر
18845	corpus-6-test-corpus-26-train	فقدت استخدام الذراع الأيمن .	بطلت أقدر أستخدم إيدي اليمين	صرت ما بقدر استخدم يدي اليمينة.	Aram	ذراع	إيد	فقدت	بطلت			MSA
8880	corpus-6-test-corpus-26-train	اثنان صفر اثنان تسعة ثلاثة تسعة ستة سبعة صفر صفر .	اثنين صفر اثنين تسعة ثلاثة تسعة ستة سبعة صفر صفر.	تنين صفر تنين تسعة تلاتة تسعة ستة سبعة صفر صفر.	Aram
9579	corpus-6-test-corpus-26-test	أين يمكنني أن أستعيد أمتعتي ؟	من وين بقدر آخذ شنتاتي؟	وين بقدر أرجع زكايتي؟	Aram	أستعيد	آخذ
7130	corpus-6-test-corpus-26-test	منذ متى ؟	من متى؟	من زمان؟	Aram
2148	corpus-6-test-corpus-26-train	أنا من بريطانيا العظمى .	أني من بريطانيا الكبيرة.	أنا من بريطانيا الكبيرة.	Aram	العظمى	الكبيرة
17886	corpus-6-test-corpus-26-train	حسناً . ليس لدينا وقت . هل يمكن أن نكمل هذه المناقشة يوم الخميس في الساعة الواحدة ؟	طيب . ما عنا وقت . منقدر نكمل هاي المناقشة يوم الخميس الساعة وحدة ؟	طيب . ما عندنا وقت . بإمكانا نكمل هاي الحكي يوم الخميس الساعة الوحدة ؟	Aram	لدينا	عنا					MSA
13072	corpus-6-test-corpus-26-train	بالتأكيد ، انزل من على الدرج هناك وسوف تجد بعض الإرشادات فاتبعها من فضلك .	أكيد، إنزل من الدرج هناك وراح تلاقي تعليمات، اتبعهن لو سمحت.	أكيد، نزل من السلم هناك وراح تلاقي تعليمات، اتبعهم لو سمحت.	Aram	تجد	تلاقي	إرشادات	تعليمات			MSA
1560	corpus-6-test-corpus-26-train	أريد مجفف .	بدي سشوار.	بدي مجفف.	Aram					مجفف :سشوار
11041	corpus-6-test-corpus-26-dev	معذرة , أريد استخدام غرفة الراحة .	معليش، بدي أروح على الحمام.	معليش، بدي أروح على الحمام.	Aram							MSA
10224	corpus-6-test-corpus-26-train	نعم ، لدينا حجز لك .	مزبوط، عنا حجز إلك.	أيوه، عنا حجز لإلك.	Aram	لدينا	عنا	صحيح	مزبوط
8618	corpus-6-test-corpus-26-train	أود استئجار شمسية .	بدي استأجر شمسية.	بدي أكرّر شمسية.	Aram
6498	corpus-6-test-corpus-26-train	كيف عرفت السائق متى تريد أن تنزل ؟	كيف بتخلي السايق يعرف إنك بدك تنزل؟	كيف السواق عرف إمتى بدك تنزل؟	Aram	سائق	سايق
5121	corpus-6-test-corpus-26-train	هل لك أن تريني الخاتم الثاني من جهة اليسار ؟	ممكن تفرجيني الخاتم الثاني يلي من جهة اليسار؟	ممكن توريني الخاتم التاني من جهة اليسار؟	Aram	تريني	تفرجيني
14519	corpus-6-test-corpus-26-dev	اشعر بأنني ملئ بالحيوية منذ الليلة الماضية .	حاس إني مليان طاقة من امبارح الليل.	حاسس اني مليان طاقة من امبارح الليل.	Aram	ملئ	مليان	أشعر	حاس			MSA
17609	corpus-6-test-corpus-26-train	أربعون دولار يومياً ، بالإضافة إلى ثمانية سنت لكل ميل .	أربعين دولار كل يوم، مع زيادة ثمنية سنت عكل ميل.	أربعين دولار كل يوم، مع زيادة ثمنية سنت على كل ميل.	Aram	إضافة	زيادة					MSA
6056	corpus-6-test-corpus-26-test	إلى طوكيو ، من فضلك .	على طوكيو، لو سمحت.	لـ طوكيو ، إذا سمحت.	Aram	إلى	على
1968	corpus-6-test-corpus-26-train	هل أنت أمريكي ؟	إنت أمريكي؟	إنت أمريكي؟	Aram	أنت	إنت
17935	corpus-6-test-corpus-26-train	ماذا عن الغداء ؟	شو عن الغدا؟	شو عن الغدا؟	Aram	غداء	غدا					MSA
8914	corpus-6-test-corpus-26-train	أين يمكنني مشاهدة عَرْض " شبح الأوبرا " ؟	وين ممكن أحضر عرض" شبح الأوبيرا"؟	وين ممكن اشوف عرض "شبح الأوبرا" ؟	Aram
4182	corpus-6-test-corpus-26-train	ما هي تكلفة الخدمة تقريبا ؟	قديش بتكلف الخدمة تقريبا؟	شو تكلفة الخدمة تقريبا؟	Aram
855	corpus-6-test-corpus-26-train	أود أن أضع ذلك في صندوق ودائع آمن .	أني بدي أحط هاظ بصندوق أمانات يكون آمن.	بدي احطها في صندوق امانات ما فيه امان منه.	Aram	ودائع	أمانات	إلى	ل
10411	corpus-6-test-corpus-26-train	نريد مائدة بالقرب من المسرح .	بدنا طاولة قريبة عن المسرح.	بدنا طاولة قريبة عن المسرح.	Aram							MSA
15246	corpus-6-test-corpus-26-train	حافلة عادية أم حافلة مجهزة للنوم ؟	باص عادي ولا باص مجهز للنوم ؟	باص عادي ولا باص مرتب للنوم ؟	Aram	حافلة	باص					MSA
1539	corpus-6-test-corpus-26-train	ما التذكار الخاص بهاواي ؟	شو هو التذكار الخاص بهاواي؟	شو تذكارها هاواي؟	Aram
4269	corpus-6-test-corpus-26-train	هل سيحاسب كل واحد منا على مشروباته منفردا ؟	بده يحاسب كل واحد منا عطلبه لحال؟	هل رح يحاسب كل واحد منّا على مشروباتو لحالو؟	Aram	منفردا	لحال
18189	corpus-6-test-corpus-26-train	ملعقة أخرى , من فضلك .	معلقة ثانية, لو سمحت.	ملعقة ثانية, لو سمحت.	Aram	ملعقة	معلقة					MSA
4740	corpus-6-test-corpus-26-train	مفتاحين من فضلك ؟	مفتاحين لو سمحت.	تكرم عينك، بدي مفتاحين.	Aram
18727	corpus-6-test-corpus-26-train	هل تستطيع أن تتناول العشاء معنا هذا المساء ؟	بتقدر تتعشى معنا الليلة؟	بتقدر تحضر العشا معنا الليلة؟	Aram	المساء	الليلة					MSA
6825	corpus-6-test-corpus-26-train	أين يمكن أن أركب القارب ؟	من وين بقدر اطلع بالقارب؟	وين بقدر أركب القارب؟	Aram
14477	corpus-6-test-corpus-26-train	هل يصعد هذا إلى الدور السادس ؟	هاذ بطلع للطابق السادس؟	هاد بيرفع للطابق السادس؟	Aram	يصعد	بطلع	دور	طابق			MSA
18912	corpus-6-test-corpus-26-test	اعتقد أن هناك خطأ في الفاتورة .	بظن انو في غلط بالفاتورة.	بظن انو في غلط بالحساب.	Aram	خطأ	غلط					MSA
13436	corpus-6-test-corpus-26-train	أعتقد أن هناك أخطاءً في الفاتورة .	بظن انه في أغلاط بالفاتورة.	بظن انه في غلطات بالفاتورة.	Aram	أخطاء	أغلاط	أعتقد	بظن			MSA
4478	corpus-6-test-corpus-26-dev	عذرا ، ولكني ضللك طريقي . هل لك أن تساعدني ؟	معلش ، بس ضيعت طريقي. ممكن تساعدني؟	معذرة ، بس انا ضيعت طريقي . بتقدر تساعدني؟	Aram	ضللت	ضيعت	عذرا	معلش
5521	corpus-6-test-corpus-26-train	من فضلك هل يمكنك أن تتلقى رسالة ؟	لو سمحت بتقدر تستقبل رسالة؟	من فضلك، فيك تستقبل رسالة؟	Aram	تتلقى	تستقبل
1782	corpus-6-test-corpus-26-train	هل من الممكن أن تخبرني عندما تعثروا علي الحقيبة الضائعة ؟	ممكن تخبرني بس تلاقوا الشنتة الضايعة؟	ممكن تقلي لما تلاقو الشنطة الضايعة ؟	Aram	ضائعة	ضايغة	تعثروا	تلاقوا
3920	corpus-6-test-corpus-26-train	لم نقرر بعد .	بعدنا ما قررنا .	ما حكمنا لسا.	Aram	نقرر	قررنا
5847	corpus-6-test-corpus-26-train	من فضلك أعط طفلك هذا الدواء الشراب , جرعة واحدة بعد كل وجبة .	لو سمحت إعطي هاذ الدوا الشراب لابنك، مرة وحدة بعد كل وجبة.	من فضلك اعطي طفلك هالدوا شراب, دوزة وحدة بعد كل اكلة.	Aram	جرعة	مرة	أعط	إعطي
14998	corpus-6-test-corpus-26-train	لو إن المسافة خمسة عشرة دقيقة فقط من المحطة ، إذن سأمشيها .	لو المسافة خمسطعشر دقيقة بس من المجمع ، بمشيها لعاد.	لو البُعد بس خمستاشر دقيقة من المحطة، ممشيها يعني.	Aram	إذن	لعاد	خمسة عشر	خمسطعشر			MSA
17117	corpus-6-test-corpus-26-train	أين يمكنني استعادة ثمن هذه التذكرة ؟	وين بقدر ارجّع حق هالتذكرة؟	وين بقدر استرجع ثمن هالتذكرة؟	Aram	استعيد	ارجّع	ثمن	حق			MSA
13290	corpus-6-test-corpus-26-train	هل هذا مصنوع آليا أم يدويا ؟	هاذ صناعة آلية ولا يدوية؟	هاد منصوع بالالة ولا بالإيد؟	Aram	أم	ولا					MSA
16601	corpus-6-test-corpus-26-train	الركاب المسافرون على خطوط إيه بي سي الجوية رحلة رقم سبعة صفر ثلاثة المتجهة إلى طوكيو التفضل بالتوجه إلى بوابة رقم عشرين لإنهاء الإجراءات الرسمية .	الركاب المسافرين على خطوط إيه بي سي الجوية رحلة رقم سبعة صفر ثلاثة واللي رايحة على طوكيو الرجاء روحوا على البوابة رقم عشرين عشان تخلصوا الأمور الرسمية.	الناس اللي عم بسافرو على خطوط ABC الجوية رحلة رقم سبعة صفر ثلاثة واللي رايحة على طوكيو الرجاء توجهوا على البوابة رقم عشرين عشان تخلصوا الأمور الرسمية.	Aram	تنهي	تخلص	التفضل	الرجاء			MSA
10670	corpus-6-test-corpus-26-train	سعر رائع ، أليس كذلك ؟	سعر حلو، مو هيك؟	سعر حلو، مو هيك؟	Aram							MSA
8409	corpus-6-test-corpus-26-test	إنه مغلق في أيام الاثنين ، ولكن أي يوم آخر سيكون لا بأس به . أعتقد أنه يُفتح من التاسعة حتى الخامسة .	بسكر أيام الإثنين، بس أي يوم ثاني بكون فاتح. بظن أنه بفتح من التسعة للخمسة.	بيكون مسكّر أيام الاتنين، بس أي يوم غيره بكون كويس. بظن إنه بيفتح من التسعة للخمسة.	Aram	يغلق	بسكر
18440	corpus-6-test-corpus-26-dev	ستنتظر حوالي عشرة دقائق أو ما يقارب ذلك .	رح تستني حوالي عشر دقايق أو هيك شي.	رح تستني حوالي عشر دقايق أو هيك شي.	Aram	تنتظر	تستنى					MSA
10164	corpus-6-test-corpus-26-train	هذه هدية ، هل يمكن أن تلفها لي في ورق لف جميل ؟	هاي هدية. ممكن تلفها بورق هدايا حلو؟	هاي هدية، تقدر ترولها الي بورق رول حلو؟	Aram	جميل	حلو
13788	corpus-6-test-corpus-26-train	كيف تحب هذه الفكرة ؟ نحن نقبل بشرطك الذي ينص على فترة بلاغ مسبق قدرها ستة اشهر شريطة أن تمنحنا الحق بالبيع لمدة ستة أشهر بعد إنهاء العقد .	شو رأيك بهالفكرة؟ احنا قبلنا بشرطك اللي كاتب فيه عن فترة انذار مسبقة قد ما تكون ستة أشهر، بس بس يكون عنا الحق نبيع لمدة ستة أشهر بعد ما نخلص العقد.	شو رأيك بهالفكرة؟ احنا قبلنا بشرطك اللي كاتب فيه عن فترة انذار مسبقة قد ما تكون ستة أشهر، بس بس يكون عنا الحق نبيع لمدة ستة أشهر بعد ما نخلص العقد.	Aram							MSA
6780	corpus-6-test-corpus-26-test	كيف كانت ؟	كيف كانت؟	كيف كانت؟	Aram
1396	corpus-6-test-corpus-26-train	أيمكنني أن أقدم لك أي شيء ؟	بقدر أضيفك أي اشي؟	ممكن أجيبلك اشي؟	Aram	أقدم	أضيف
15320	corpus-6-test-corpus-26-train	أجل . من فضلك اتخذ الإجراء الضروري .	نعم ، اعمل الإشي الضروري.	أجل، بالراحة اعمل اللي لازم تعمله.	Aram	أجل	نعم	اتخذ	إعمل			MSA
14520	corpus-6-test-corpus-26-train	هذا لا يناسب ذوقي .	هاذ مش عزوقي.	هاد مش عاجبني.	Aram	ذوقي	زوقي					MSA
8851	corpus-6-test-corpus-26-train	اليوم سأذهب لأرى كيف يبدو الحيّ الصين .	اليوم راح أروح أشوف كيف منظر الحيّ الصين.	اليوم رايح اشوف شكل الحي الصيني.	Aram	يبدو	منظر
4278	corpus-6-test-corpus-26-train	من فضلك ، اصلح هذه .	لو سمحت صلح هاذا.	لو سمحت، صلحلي هاي.	Aram	اصلح	صلح
6515	corpus-6-test-corpus-26-train	عملت الحجز في طوكيو منذ شهر .	عملت الحجز بطوكيو من شهر.	سويت حجز بطوكيو من شهر.	Aram	منذ	من
14403	corpus-6-test-corpus-26-dev	سوف أتناول كأسا من النبيذ .	راح أشرب كاس من الواين.	راح أشرب كاس من الخمرة.	Aram	كأس	كاس			نبيذ: واين		MSA
8210	corpus-6-test-corpus-26-train	من فضلك أرني جواز سفرك .	لو سمحت ورجيني جواز سفرك.	لو سمحت، دزني جوازك.	Aram	أرني	ورجيني
14389	corpus-6-test-corpus-26-train	أية رسائل لي ؟	في أي رسايل إلي؟	عندي رسايل؟	Aram	رسائل	رسايل					MSA
6272	corpus-6-test-corpus-26-train	أخشى أن تكون الأكمام قصيرة جدا .	خايف تكون الكمام كثير قصيرة.	بخاف انه الكمام تكون قصيرة كتير.	Aram	جدا	كثير
2964	corpus-6-test-corpus-26-train	حسنا ، هل يمكنك أن تخبرها أنني اتصلت ، من فضلك ؟ سأتصل بها مرة أخرى فيما بعد .	طيب، بتقدر تحكيلها اني اتصلت، لو سمحت؟ راح أتصل فيها مرة ثانية بعدين.	ماشي، ممكن تقوللها اني اتصلت، بدي أتصل فيها مرة ثانية بعدين .	Aram	حسنا	طيب	أخرى	ثانية
9604	corpus-6-test-corpus-26-train	الساعة الحادية عشر وخمس وأربعون دقيقة في الصباح .	الساعة احدعشروخمس واربعين دقيقة في الصبح.	الساعة إحداعشر وخماسة وأربعين دقيقة بالصبح.	Aram
13113	corpus-6-test-corpus-26-test	هل هو طازج إلى هذا الحد ؟	هو طازا لهالدرجة	هيك بتكون طازج؟	Aram	طازج	طازا	إلى هذا الحد	لهالدرجة			MSA
19156	corpus-6-test-corpus-26-train	كم مدة صلاحية هذه الفيزا ؟	كم مدة صلاحية هاي الفيزا ؟	كم مدة هاي الفيزا بتستمر؟	Aram							MSA
742	corpus-6-test-corpus-26-train	هل يمكنك أن تغير الصياغة طبقاً لما قلته للتو ؟	بتقدر تغير الصيغة مثل ما قلت هسا؟	ممكن تغير الكلام حسب اللي حكيته هسا؟	Aram	صياغة	صيغة	طبق	مثل
368	corpus-6-test-corpus-26-train	ساعتي . كانت ساعة سيكو رقمية .	ساعتي. كانت الكترونية من سيكو.	ساعتي. كانت ساعة سيكو رقمية.	Aram	رقمية	الكترونية
18181	corpus-6-test-corpus-26-train	هل لديك أتوبيس من المطار ؟	عندك باص من المطار؟	عندك باص من المطار؟	Aram	أتوبيس	باص					MSA
19466	corpus-6-test-corpus-26-train	أجل ، إننا على وشك معالجته ، على وشك معالجته .	أه، احنا على وشك نعالجه, على وشك نعالجه.	أه، احنا على وشك نعالجه, على وشك نعالجه.	Aram							MSA
1234	corpus-6-test-corpus-26-train	كم سأدفع للوصول إلى المطار ؟	قديش رح أدفع حتى اوصل للمطار؟	أديش رح أدفع عشان أوصل للمطار؟	Aram	ل	حتى
10416	corpus-6-test-corpus-26-train	أنا بحالة جيدة . حسنا , هل أنت ذاهب إلى مكان ما ؟	أنا مرتاح. زين, رايح على وين؟	أنا مرتاح. زين, رايح على وين؟	Aram							MSA
11990	corpus-6-test-corpus-26-train	لقد انزلقت قدما صديقي وسقط في الحمام .	قدما صاحبي انزلقوا ووقع بالحمام.	قدما صاحبي انزلقوا ووقع بالحمام.	Aram							MSA
11392	corpus-6-test-corpus-26-train	لا أشعر أنني على ما يرام . من فضلك اعطني بعض الدواء .	ما بحس حالي منيح. لو سمحت، اعطيني شوي دوا.	ما بحس حالي منيح. لو سمحت، اعطيني شوي دوا.	Aram							MSA
18725	corpus-6-test-corpus-26-train	أراه دائما كل صباح في القطار .	بشوفه دايما كل صبح في القطار.	بشوفه دايما كل صبح في القطار.	Aram	دائما	دايما	أراه	بشوفه			MSA
13843	corpus-6-test-corpus-26-train	كود المنطقة هو صفر ثلاثة . والرقم هو ثلاثة واحد اثنان ثلاثة أربعة خمسة ستة سبعة .	رمز المنطقة هو صفر تلاتة. والرقم هو تلاتة واحد اتنين تلاتة أربعة خمسة ستة سبعة.	رمز المنطقة هو صفر تلاتة. والرقم هو تلاتة واحد اتنين تلاتة أربعة خمسة ستة سبعة.	Aram							MSA
15157	corpus-6-test-corpus-26-train	معذرة . هل لك أن تدلني على مكان موقف سيارات الأجرة ؟	معلش، بتقدر تدلني على موقف سيارات التكسي؟	معلش، بتقدر تدلني على وين موقف سيارات الطاكسي؟	Aram	معذرة	معلش			سيارة أجرة : تكسي		MSA
1622	corpus-6-test-corpus-26-train	هل هناك طريق حر ؟	في طريق فرعي؟	في طريق فاضي ؟	Aram	هل هناك	في
7439	corpus-6-test-corpus-26-train	هل رأيت معطف أزرق ؟ وضعته على هذا الكرسي .	شفت كبوت ازرق؟ حطيته على هاد الكرسي.	شفت معطف أزرق؟ حطيته على هالكرسي.	Aram	وضعت	حطيت	أزرق	إزرق
2939	corpus-6-test-corpus-26-train	ميكي هاياكاوا . هذه غرفة سبعة صفر اثنين .	ميكي هاياكاوا. هاي غرفة رقم سبعة صفر اثنين.	ميكي هاياكاوا. هاي الغرفة سبعة صفر اتنين.	Aram
12603	corpus-6-test-corpus-26-train	في أي الدول صنعت هذه .	بأي بلد سووا هاي؟	بأي بلد سووا هاي؟	Aram							MSA
16082	corpus-6-test-corpus-26-test	هل لك أن تزن هذا الطرد ؟	بتقدر توزن هالطرد؟	بتقدر تزن هالطرود؟	Aram	تزن	توزن					MSA
19101	corpus-6-test-corpus-26-train	شكراً . عد إلى غرفتي في نفس الوقت غدا . ستكون الصور جاهزة . قبل ذلك .	مشكور، ارجع لغرفتي بنفس الوقت بكرة . الصور رح تكون جاهزة . قبل هيك .	مشكور، رجعلي غرفتي بنفس الوقت بكرة . الصور رح تكون جاهزة . قبل هيك .	Aram	عد	ارجع	غد	بكرا			MSA
16577	corpus-6-test-corpus-26-train	لقد استمتعت كثيرا .	كيفت كثير .	تحششت زي العسل.	Aram	استمتعت	كيفت					MSA
14018	corpus-6-test-corpus-26-train	سوف أتناول زجاجة سبرايت كبيرة .	رح أشرب قنينة سبرايت كبيرة.	رح آكل بوطلة سبرايت كبيرة.	Aram	زجاجة	قنينة					MSA
8058	corpus-6-test-corpus-26-train	سوف أطلب شخصاً ما .	رح أحكي مع حدا.	رح أطلب حدا.	Aram	شخص	حدا
8604	corpus-6-test-corpus-26-test	معذرةً . هل لي بأن انتهي من هذا الأمر ؟	عفواً، ممكن نخلص من هاد الموضوع؟	سامحني. بإمكاني أكمل هالشغلة؟	Aram	معذرة	عفواً
3413	corpus-6-test-corpus-26-dev	هل لك أن تستبدل هذه بواحدة أخرى من نفس النوع من فضلك ؟	ممكن تبدل هاي بوحدة ثانية من نفس النوع، لو سمحت؟	ممكن تبدلي هاي بواحدة تانية نفس الصنف لو سمحت؟	Aram	تستبدل	تبدل	هل لك	ممكن
19507	corpus-6-test-corpus-26-dev	ما هو رقم الصراف ؟	شو رقم الصراف؟	شو رقم الصراف؟	Aram							MSA
5717	corpus-6-test-corpus-26-train	أية حافلة يجب أن آخذ إلى المحطة ؟	أي باص لازم أوخذ عشان أروح على المحطة؟	أي باص لازم أركب عشان أروح عالمحطة؟	Aram	آخذ	أوخذ	يجب	لازم
9526	corpus-6-test-corpus-26-train	هل يمكنني الحصول على خريطة للمترو ؟	ممكن أشوف خريطة للمترو؟	ممكن أحصل على خريطة المترو؟	Aram
10114	corpus-6-test-corpus-26-train	أين مكتب الأشياء المفقودة .	وين مكتب الأشياء المفقودة؟	وين مكتب الأغراض الضايعة؟	Aram
19269	corpus-6-test-corpus-26-train	لقد بالغ آخر قطار في التأخر .	اخر قطار تأخر كثير.	اخر قطار تأخر كتير.	Aram							MSA
14901	corpus-6-test-corpus-26-dev	هل يمكنك أن تغيير لي هذا القرط إلى أخرى يمكن أن تشبك .	بتقدر تغيرلي هالقرط لوحدة تانية يمكن تنشبك.	بتقدر تغيرلي هالقرط لوحدة تانية يمكن تنشبك.	Aram							MSA
16098	corpus-6-test-corpus-26-train	أريد التأمين على هذا .	بدي أمّن على هاذ.	بدي أتأمّن على هاي.	Aram							MSA
13550	corpus-6-test-corpus-26-train	لقد وضعت المال في مظروف خاص مزين يسمى شوجيبوكورو .	حطيت المصاري بظرف خاص مزركش اسمه شوجيبوكورو.	حطيت الفلوس في كيس خاص زينين اسمه شوجيبوكورو.	Aram	مزين	مزركش	مظروف	ظرف			MSA
18617	corpus-6-test-corpus-26-train	من الأفضل أن نسرع . انهم يركبون بالفعل .	أحسن لو نسرع، همه بالفعل ركبو.	أحسن لو نسرع، همه بالفعل ركبو.	Aram	أفضل	أحسن					MSA
1329	corpus-6-test-corpus-26-train	ارشح ذلك لأنه مائة في المائة مصنوع من مكونات طبيعية .	أني بنصحك بهاذ لأنه مصنوع من مواد طبيعية مية بالمية.	بأيشح ذاك لأنه مية بالمية محضر من مكونات طبيعية.	Aram	ارشح	بنصح	مائة	مية
4594	corpus-6-test-corpus-26-train	نعم ، لا توجد مشكلة . هل من الممكن أن أرى جواز سفرك ؟	نعم، ما في مشكلة. ممكن أشوف جواز سفرك؟	أيوه, مافي مشكلة. بتقدر تطلعلي على جواز سفرك؟	Aram
3792	corpus-6-test-corpus-26-dev	هل يمكنني أن أدفع بشيكات سياحية ؟	بقدر أدفع عن طريق شيكات سياحية؟	ممكن أدفع بشيكات سياحية؟	Aram
13828	corpus-6-test-corpus-26-dev	هل هذه مكونات طبيعية ؟	هاي مكونات طبيعية؟	هاي مكونات طبيعية؟	Aram							MSA
3292	corpus-6-test-corpus-26-train	أريد شاي من فضلك .	بدي شاي إذا بتسمح.	بدي شاي لو سمحت.	Aram	من فضلك	إذا بتسمح
11997	corpus-6-test-corpus-26-train	حظرت المسيحية وأغلقت البلاد بالنسبة لبقية العالم .	مسكرت المسيحية وسكرت البلاد عن باقي الدنيا.	مسكرت المسيحية وسكرت البلاد عن باقي الدنيا.	Aram							MSA
17780	corpus-6-test-corpus-26-train	هل ستعود لبلادك في الاجازات ؟	راح ترجع على بلدك بالعطل؟	راح ترجع على بلدك بالأجازة؟	Aram	إجازات	عطل	تعود	ترجع			MSA
14789	corpus-6-test-corpus-26-train	هل لديك أحجار بطارية لهذه الكاميرا ؟	عندك بطاريات لهاي الكميرا؟	عندك بطاريات لهاي الكاميرا؟	Aram	كاميرا	كميرا					MSA
8355	corpus-6-test-corpus-26-train	هذا زميلي .	هاذ زميلي.	هاد زميلي.	Aram
11550	corpus-6-test-corpus-26-train	هل تستطيع تصليح هذا ؟	ممكن تصلح هاي؟	ممكن تصلح هاي؟	Aram							MSA
10468	corpus-6-test-corpus-26-train	آسف لقد نفدت ، لكن سوف تردنا بعد بضعة أيام .	معذرة, صارت خلصت، بس رح يرجعوها بعد يومين أو تلاتة.	معذرة, صارت خلصت، بس رح يرجعوها بعد يومين أو تلاتة.	Aram							MSA
18747	corpus-6-test-corpus-26-train	سأقيم في فندق بي حتى غداً . أكون مسروراً إذا أخبرته أنني هنا .	راح أقعد بفندق بي لبكرا. بكون مبسوط لو خبرته إني هون.	راح أكون بفندق بي لبكرا. كون مبسوط لو خبرتو إني هون.	Aram	أقيم	أقعد	مسرور	مبسوط			MSA
19610	corpus-6-test-corpus-26-dev	املأ استمارة التسجيل هذه , من فضلك .	عبي هاي الاستمارة, لو سمحت.	يملي هاي الاستمارة, لو سمحت.	Aram	املأ	عبي					MSA
18646	corpus-6-test-corpus-26-train	أريد نفس الشيء ، من فضلك .	بدي نفس الشي، لو سمحت.	بدي نفس الشي، لو سمحت.	Aram	شيء	شي					MSA
9432	corpus-6-test-corpus-26-train	ليس لدي أمتعة للتفتيش .	ما عندي شناتي للتفتيش.	ما عندي حقايب للتفحص.	Aram	أمتعة	شناتي
19423	corpus-6-test-corpus-26-train	كم تتقاضى نظير التفصيل ؟	قديش بتوخذ بدال التفصيل؟	أديش بتاخدي عشان التفصيل؟	Aram	نظير	بدال	تتقاضى	بتوخذ			MSA
11663	corpus-6-test-corpus-26-train	ربما أستطيع مساعدتك . هل تحتاج إلى فيتامين سي ؟	ممكن اقدر اساعدك . بتحتاج فيتامين سي؟	ممكن اقدر اساعدك . بتحتاج فيتامين سي؟	Aram							MSA
3269	corpus-6-test-corpus-26-train	الآن موسم جمع المحار ، لذلك سيكونون في حالة جيدة .	هسا موسم جمع المحار، عشان هيك بيكونو طيبين.	هسا موسم تجميع الصدف، فهمه رح يكونوا بحالة كويسة.	Aram	بحالة جيدة	طيب
12905	corpus-6-test-corpus-26-dev	كم مقاطعة هناك بالإضافة إلى طوكيو ؟	أديش محافظات في غير طوكيو؟	أديش محافظات في غير طوكيو؟	Aram							MSA
3182	corpus-6-test-corpus-26-train	هل توجد أي حقبة معينة للفن تفضلها ؟	في أي فترة معينة بالفن إنت بتفضلها؟	فيه فترة معينة بالفن بتحبها؟	Aram	حقبة	فترة	أنت	إنت
16936	corpus-6-test-corpus-26-test	هل لديك أي مقاعد شاغرة للندن ؟	عندك اي كراسي فاظية لندن؟	عندك اي كراسي فاضية لعلى لندن؟	Aram	شاغرة	فاظية					MSA
13993	corpus-6-test-corpus-26-train	أريد شامبو للشعر العادي .	بدي شامبو للشعر العادي.	بدي شامبو للشعر العادي.	Aram							MSA
17414	corpus-6-test-corpus-26-train	خذ هذه التذكرة الطبية إلى الصيدلية . يمكنك الحصول على الدواء من هناك .	خذ هالوصفة الطبية للصيدلية. بتقدر توخد الدوا من هنيك.	خذ هالوصفة الطبية للصيدلية. بتقدر تاخد الدوا من هنيك.	Aram	دواء	دوا	تذكرة	وصفة			MSA
1650	corpus-6-test-corpus-26-train	آسف , لقد اتصلت بالرقم الخطأ .	آسف، أني اتصلت بالرقم الغلط.	معذرة، كنت اتصلت على رقم غلط.	Aram
120	corpus-6-test-corpus-26-test	كنت سأشتري هذا إن كنت في مكانك ؟	كنت رح اشتريه لو كنت محلك .	كنت راح أشتري هاد اذا كنت مكانك؟	Aram	مكانك	محلك
19401	corpus-6-test-corpus-26-dev	لدي موهبة فطرية .	عندي موهبة طبيعية.	عندي موهبة طبيعية.	Aram	فطرية	طبيعية					MSA
1670	corpus-6-test-corpus-26-test	هاك جواز سفري .	هاك جواز السفر تاعي.	هي جواز سفري.	Aram	خذ	هاك
6613	corpus-6-test-corpus-26-test	أهلاً ، شريكك على الخط . هيا ، من فضلك .	اهلين ، اللي طلبته على الخط. يلا، لو سمحت.	هلا ، شريكك عالسطر . يلا ، بدي رحمة .	Aram	هيا	يلا	اهلاً	أهلين
11054	corpus-6-test-corpus-26-train	هل لديكم طعام بحري ؟	عندكم اكل بحري؟	عندكم اكل بحري؟	Aram							MSA
2644	corpus-6-test-corpus-26-train	أين يمكنني أن أشتري حصيرة للشاطئ ؟	من وين بقدر أشتري درج للشط؟	وين بقدر اشتري سجادة شاطئ؟	Aram	حصيرة	درج	شاطئ	شط
14074	corpus-6-test-corpus-26-train	ثلاثة أقداح من عصير الشمام ، من فضلك .	ثلاث كاسات من عصير الشمام، لو سمحت.	تلاتة أكواب من عصير الشمام، لو سمحت.	Aram	أقداح	كاسات					MSA
15598	corpus-6-test-corpus-26-test	أين كتب اللغة الأجنبية ؟	وين الكتب الأجنبية؟	وين الكتب الأجنبية؟	Aram	أين	وين					MSA
9325	corpus-6-test-corpus-26-train	هل هذا القطار يتجه مباشرة إلى إدنبره ؟	هاد القطار بروح مباشرة على إدنبره؟	هاي القطار رايح على طول لادنبرة؟	Aram	يتجه	بروح
6862	corpus-6-test-corpus-26-test	إنه طول الطريق لنهاية البهو .	على طول الطرق لآخر اللوبي.	هو طول الطريق لآخر الصالة.	Aram	نهاية	آخر			البهو: اللوبي
2613	corpus-6-test-corpus-26-dev	كم الأجرة إلى مانشستر ؟	قديش الأجرة لمانشستر؟	أديش الأجرة لـ مانشستر؟	Aram	إلى	ل
8637	corpus-6-test-corpus-26-train	الماء أسخن من اللازم .	المي كثير حامية.	المي دافي أكثر من اللازم.	Aram	ساخن	حامي
8905	corpus-6-test-corpus-26-train	أرغب في حقيبة مستحضرات تجميل .	بدي شنتة مكياج.	بدي شنطة مكياج.	Aram	مستحضرات تجميل	مكياج
18161	corpus-6-test-corpus-26-train	مساء الجمعة , في التاسعة .	مسا الجمعة, عالتسعة.	مسا الجمعة, بالتاسعة.	Aram	مساء	مسا	تاسعة	تسعة			MSA
1369	corpus-6-test-corpus-26-train	هل من الممكن أن تخبرني أين أستطيع أن أحصل على تاكسي ؟	بتقدر تحكيلي من وين بلاقي تكسي؟	ممكن تقلي وين بقدر الاقي تكسي؟	Aram	أحصل على	بلاقي	هل من الممكن	بتقدر
9242	corpus-6-test-corpus-26-test	كم حقيبة يمكن أن أحضرها معي في الطائرة ؟	كم شنتة بقدر آخذها معي على الطيارة؟	كم شنطة بقدر أجيبها معي عالطيارة؟	Aram
18569	corpus-6-test-corpus-26-train	هل لديك بطاقات ادعائك ؟	عندك انت بطاقات دعوتك؟	عندك انت بطاقات دعوتك؟	Aram	إدعاء	دعوة					MSA
5455	corpus-6-test-corpus-26-train	نحن لا نجلب أية هدايا إلى الحفل ، وبدلا من ذلك يحضر الضيوف أموالاً نقدية .	إحنا ما منجيب أي هدايا عالحفلة، بدال هيك الضيوف بجيبو مصاري.	احنا ما بنجيب أي هدايا عالحفلة، بدل هيك الضيوف بيجيبوا مصاري نقدية.	Aram	حفل	حفلة	بدلاً	بدال
3185	corpus-6-test-corpus-26-train	من فضلك تحقق منها مرة أخرى .	لو سمحت اتأكد منها مرة ثانية.	من فضلك شيك عليها مرة ثانية.	Aram	تحقق	اتأكد
15431	corpus-6-test-corpus-26-train	قدمي تؤلمني .	إجري بتوجعني.	رجلي بتوجعني.	Aram	قدمي	إجري					MSA
18254	corpus-6-test-corpus-26-train	هل من الممكن أن تدفع مبلغ عشرة دولارات للمقدم ؟	بصير تدفع عشرة دولارات للمقدم؟	بتقدر تدفع عشرة دولارات للمقدم؟	Aram							MSA
12182	corpus-6-test-corpus-26-train	هل تقدمون تخفيضات كبيرة ؟	بتسووا تنزيلات كبار؟	بتسووا تنزيلات كبار؟	Aram							MSA
5584	corpus-6-test-corpus-26-dev	رقم الرحلة الجوية اتش بي تسعة وثمانين المتجهة إلى طوكيو في الحادي عشر من مارس .	رقم الرحلة الجوية إتش بي تسعة و ثمانين رايحة لطوكيو في احدعش ثلاث.	رقم الرحلة الجوية اتش بي تسعة و تماني، رايحة على طوكيو في الحداش من مارس.	Aram	متجهة	رايحة
1375	corpus-6-test-corpus-26-train	تذكرتين درجة ثانية من فضلك .	تذكرتين من الدرجة الثانية لو سمحت.	تكتتين درجة تانية لو سمحت.	Aram
17453	corpus-6-test-corpus-26-train	نعم , يمكنك أن تتوقف في أي محطة ما بين هنا وشيكاغو .	أيوة, بتقدر توقف بأي محطة مابين هون وشيكاغو.	أيوة, فيك توقف بأي محطة مابين هون وشيكاغو.	Aram	تتوقف	توقف					MSA
5267	corpus-6-test-corpus-26-test	ابحث عن كروت لمناظر تعكس طبيعة جزر هاواي .	بدور على كروت لمنظر بتبين طبيعة جزر هاواي.	بدي ادور على كروت لمناظر بتعبر عن طبيعة جزر هاواي.	Aram	تعكس	بتبين
2302	corpus-6-test-corpus-26-train	هل تتحدث ؟	إنت بتسولف؟	بتحكي؟	Aram	تتحدث	بتسولف
7438	corpus-6-test-corpus-26-train	هل لديك أي شئ لإعلانه ؟	عندك أي اشي عشان تعلنله؟	عندك اشي بدك تعلن عنه؟	Aram	أعلن	بعلن
8116	corpus-6-test-corpus-26-train	لقد تسببتّ في كَدْمة بالعَضَلة .	سوتلك كدمة بالعضل.	سَوّيتلِي ضَربة بالعضلة.	Aram	تسببت	سوت
17222	corpus-6-test-corpus-26-train	أود تصفيف شعري بالطريقة التي كان عليها من قبل .	بدي أعمل شعري زي ما كان قبل.	بدي أعمل شعري زي ما كان قبل.	Aram	أصفف	أعمل					MSA
10477	corpus-6-test-corpus-26-train	ليس لدي موعد ، لكن الأمر عاجل .	ما عندي موعد، بس الأمور ضرورية.	ما عندي موعد، بس الأمور ضرورية.	Aram							MSA
4143	corpus-6-test-corpus-26-train	هل أنا بحاجة إلى تذكرة ؟	بحتاج تذكرة؟	بدي تذكرة؟	Aram
3222	corpus-6-test-corpus-26-dev	هذا الطريق من فضلك . خذ هذا المصعد .	هاذ الطريق لو سمحت. أخدذ هاذ السلم.	هاد الطريق لو سمحت . خذ هاد الأسانسير.	Aram	خذ	أخذ
17798	corpus-6-test-corpus-26-train	عيد الشكر والعمال ، فهو يوم الشكر لكل الذين ساندوا المجتمع بأعمالهم .	عيد الشكر و العمال، يوم الشكر لكل الناس اللي ساعدوا المجتمع بشغلهم.	عيد الشكر و العمال، يوم الشكر لكل الناس اللي ساعدوا المجتمع بشغلهم.	Aram	ساندوا	ساعدوا					MSA
2995	corpus-6-test-corpus-26-train	هل لديك بيرة يابانية ؟	عندك بيرا يابانية؟	عندك بيرة يابانية؟	Aram	بيرة	بيرا
13075	corpus-6-test-corpus-26-dev	المكتب الأمامي . هل يمكنني أن أساعدك ؟	أول مكتب من قدام . شلون بقدر أخدمك؟	المكتب الأمامي. كيف فيني أخدمك؟	Aram	أساعدك	أخدمك	كيف	شلون			MSA
19508	corpus-6-test-corpus-26-train	الأمر يسير . سأنظر في دليل الهاتف فحسب .	الأمور بسيط. رح أشوف بدليل التلفون بس.	الأمور بتسهل. رح أطلع بس بدليل الهاتف.	Aram	يسير	بسيط	أنظر	أشوف			MSA
184	corpus-6-test-corpus-26-train	من هو أفضل صديق لك ؟	مين أحسن صاحب عندك ؟	مين أحسن صاحب لك؟	Aram	أفضل	أحسن	صديق	صاحب
18771	corpus-6-test-corpus-26-train	اسمى شينو يامادا .	إسمي شينو يامادا.	إسمي شينو يامادا.	Aram							MSA
7343	corpus-6-test-corpus-26-train	كم أجرة التاكسي من هذا الفندق إلى المحطة ؟	كم اجار التكسي من الفندق للمجمع؟	أديش أجرة التكسي من هالفندق للمحطة؟	Aram	اجرة	أجار
10480	corpus-6-test-corpus-26-train	أين المصعد ؟	وين الأسانسير؟	وين الأسانسير؟	Aram							MSA
1951	corpus-6-test-corpus-26-train	ل , ا أريد فقط الزيارة بدون ميعاد .	لا، أني بس بدي ازوره بدون موعد.	مش , انا بس بدي ازور بدون موعد.	Aram	ميعاد	موعد
