# Supplementary material for: Exploring prompting for dialectical machine translation: a focus on north Jordanian Arabic
Source: PeerJ journal article supplement (doi:10.7717/peerj-cs.3209), 2025-11-12
Supplement: Code.zip [file Madar_Corpus_26_test.xlsx]

## Sheet: Sheet1
sentID.BTEC	split	MSA	IrbidDial	GPT	Translator	word 1	meaning 1	word 2	meaning 2	Foreign words	Has idioms	lang
4409	corpus-6-test-corpus-26-train	ما رأيك في مشاهدة فيلم آخر ؟	شو رأيك نشوف فيلم ثاني؟	شو رأيك نحضر فيلم تاني؟	Aram	آخر	ثاني
5733	corpus-6-test-corpus-26-dev	أريد كوبا من الماء لأتناول بعض الدواء , من فضلك .	بدي كاسة مي عشان اوخذ الدوا، لو سمحت.	بدي كاسة مية أكل شوية دوا , لو سمحت .	Aram	كوب	كاسة	ماء	مي
9792	corpus-6-test-corpus-26-train	أبغي كرة .	بدي طابة.	بدي كورة.	Aram	أبغي	بدي
10372	corpus-6-test-corpus-26-train	كيف تحب أن يصفف شعرك اليوم ؟	كيف بدك يسرحلك شعرك اليوم؟	شلون بدك يسويلك شعرك اليوم؟	Aram	يصفف	يسرح	تحب	بدك
5004	corpus-6-test-corpus-26-train	أريد رداءا ذات أكمام طويلة .	بدي جاكيت كم طويل.	بدي ثوب بأكمام طويلة.	Aram	رداء	جاكيت
6190	corpus-6-test-corpus-26-train	ها-ها . صباح الخير حان دورك . إنه على ما يرام .	هههه. صباح الخير صار دورك. هو كويس.	هي-هي . صباح الخير جا دورك . كله تمام .	Aram	حان	صار	على ما يرام	كويس
17217	corpus-6-test-corpus-26-train	أين نتقابل ؟	وين بدنا نتلاقى؟	وين بدنا نتلاقى؟	Aram	نتقابل	نتلاقى					MSA
12035	corpus-6-test-corpus-26-train	لقد أثلج صدري زيارة مقاركم الرئيسية وكذا ما جرى بيننا من مناقشات مهمة . شكراً جزيلاً على ما أبديتموه من تعاون .	فرحت كتير لما زرت مكاتبكم الرئيسية وكمان النقاشات الهمة اللي صارت بيناتنا. كتير شكراً على العون اللي قدمتوه.	فرحت كتير لما زرت مكاتبكم الرئيسية وكمان النقاشات الهمة اللي صارت بيناتنا. كتير شكراً على العون اللي قدمتوه.	Aram							MSA
17966	corpus-6-test-corpus-26-dev	هل هذا قطار مباشر ؟	هاذ القطار مباشر؟	هاي القطارة مباشرة؟	Aram							MSA
8688	corpus-6-test-corpus-26-dev	إبريق من القهوة ، لطفاً .	بكرج قهوة، لو سمحت.	إبريق قهوة، بليز.	Aram	إبريق	بكرج
26	corpus-6-test-corpus-26-train	كم تكلفة الإفطار ؟	بقديش الفطور ؟	أديش سعر الفطور؟	Aram	كم تكلفة	قديش
13287	corpus-6-test-corpus-26-train	من فضلك اختر لي مائدة ذات منظر ليلي لطيف .	من فظلك إختارلي طاولة مع منظر حلو بالليل.	من فضلك اختارلي طاولة مع منظر حلو بالليل.	Aram	اختر	إختار					MSA
12701	corpus-6-test-corpus-26-train	أين الحلاق ؟	وين الحلاق؟	وين الحلاق؟	Aram							MSA
4654	corpus-6-test-corpus-26-train	الشاطئ أسفل يمينا . ياله من منظر رائع .	الشط تحت على اليمين. شو المنظر بجنن.	الشاطي على جنب اليمين تحت . شو هالمنظر الحلو.	Aram	رائع	بجنن	أسفل	تحت
3201	corpus-6-test-corpus-26-dev	كلاً ، إنهم متينين جداً .	لا، هظول كثير قويات.	لأ، همه قويين كتير.	Aram	إنهم	هظول	متين	قوي
30	corpus-6-test-corpus-26-train	اتجه يسارا عند الناصية الثالثة .	روح يسار من عند الدخلة الثالثة .	روح على الشمال يوم بتوصل تالت زنقة.	Aram	اتجه	روح	ناصية	دخلة
2236	corpus-6-test-corpus-26-train	أين المحطة النهائية للحافلة ؟	وين اخر موقف للباص؟	وين الموقف الأخير للباص؟	Aram	محطة	موقف
14108	corpus-6-test-corpus-26-train	كم يتقاضى المرشد في اليوم ؟	قديش بيوخذ الدليل باليوم؟	أديش بياخذ المرشد باليوم؟	Aram	مرشد	دليل					MSA
5437	corpus-6-test-corpus-26-train	أريد كيساً من الفشار ، من فضلك .	بدي كيس بوشار، لو سمحت.	بدي كيس فشار، لو سمحت.	Aram	فشار	بوشار
2329	corpus-6-test-corpus-26-train	من فضلك غير خمسين آلاف ين إلى دولارات أمريكية .	لو سمحت اصرف الخمسين ألف ين لدولر أمريكي.	لو سمحت, غير خمستين ألف ين الى دولارات أمريكية.	Aram	غير	اصرف
346	corpus-6-test-corpus-26-train	أريد قاموس جيب ، من فضلك .	بدي قاموس بنحط بالجيبة ، لو سمحت.	بدي قاموس جيب، لو سمحت.	Aram	جيب	جيبة	يوضع	بنحط
5407	corpus-6-test-corpus-26-train	من فضلك ، أريد فنجاناً من القهوة البيضاء .	لو سمحت ، بدي فنجان قهوة بالحليب.	من فضلك، بدي فنجان قهوة بيضا.	Aram	من فضلك	لو سمحت
2462	corpus-6-test-corpus-26-train	هل يمكن أن أحصل على قمصاني نظيفة غداً صباحاً ؟	ممكن ألاقي قمصاني نظيفات بكرا الصبح؟	ممكن أقدر أخد قمصاني النظيفة بكرة الصبح؟	Aram	أحصل	ألاقي	غداً	بكرا
9312	corpus-6-test-corpus-26-train	حسنا , حجرتك يا آنسة هي رقم تسعة صفر ثمانية . هذا مفتاحك .	طيب، غرفتك يا آنسة هي تسعة صفر ثمنية. هاذ مفتاحك.	ماشي, غرفتك يا أنسة رقم تسعة صفر ثمانية. هاد مفتاحك.	Aram	حجرتك	غرفتك
11746	corpus-6-test-corpus-26-train	نعم ، بالطبع .	أيوا، أكيد.	أيوا، أكيد.	Aram							MSA
14721	corpus-6-test-corpus-26-train	ما تكلفة المقاعد الخاصة بالشرفة ؟	قديش بتكلف الكراسي تبعت البرندة؟	ادايش بكلف الكراسي الخاصة بالبرندة؟	Aram	شرفة	برندة	الخاصة	تبعت			MSA
18877	corpus-6-test-corpus-26-train	هل لي بدليل سياحي ؟	ممكن مرشد سياحي؟	ممكن مرشد سياحي؟	Aram	هل لي	ممكن					MSA
8625	corpus-6-test-corpus-26-train	أجل ، وأودّ محاسبة المطلوب هاتفياً على قيمة المكالمة .	صح، وأنا بدي احاسب يلي رنيت عليه على حق المكالمة.	أكيد، بدي احسب اللي بحكي معو بالتلفون قد المكالمة.	Aram	قيمة	حق
14478	corpus-6-test-corpus-26-dev	جلد التمساح الأمريكي .	جلد التمساح الأمريكي.	جلد الغدير الأمريكي.	Aram							MSA
16736	corpus-6-test-corpus-26-train	سأكون هنا الساعة الثامنة إلى الربع .	رح أكون هون الساعة ثمانية إلا ربع.	رح يكون هون الساعة تمانية للربع.	Aram							MSA
19703	corpus-6-test-corpus-26-train	أظن أن الملابس المصنوعة في اليابان قد جرى تفصيلها على نحو أفضل بالتأكيد .	بتوقع انو الأواعي اللي صنعت في اليابان تفصلت بطريقة أحسن أكيد.	بفكر انو الهدوم اللي صنعت في اليابان لازم فصلوها أحسن بكثير.	Aram	ملابس	أواعي	نحو	طريقة			MSA
6740	corpus-6-test-corpus-26-dev	سأكون هناك حوالي السادسة مساءً .	راح أكون هناك حوالي الساعة ستة المسا.	رح كون هنيك حوالي السادسة بالمسا.	Aram	سادسة	ستة
12611	corpus-6-test-corpus-26-dev	لا أجيد الإنجليزية . هل ثمة من يتحدث اليابانية هنا ؟	أنا مش بعرف أحكي إنجليزي. في حدا بحكي ياباني هون؟	أنا مش بعرف أحكي إنجليزي. في حدا بحكي ياباني هون؟	Aram							MSA
3155	corpus-6-test-corpus-26-train	إنني أتصل من كشك عمومي في ماسي .	أنا بحكي معك من كشك عام بماسي.	أنا بتصل من التليفون العام بـ ماسي.	Aram	عمومي	عام
7098	corpus-6-test-corpus-26-train	كم الوقت ؟	قديش الساعة؟	أديش الوقت؟	Aram	كم	قديش
15221	corpus-6-test-corpus-26-train	إنني أبحث عن هذا .	أني بدور على هاظ.	أنا عم بدور على هاد.	Aram	أبحث	بدور					MSA
4305	corpus-6-test-corpus-26-train	لماذا لا تعطيها هدية ؟	ليش ما تعطيها هدية؟	ليش ما بتعطيها هدية؟	Aram	لماذا	ليش
6006	corpus-6-test-corpus-26-train	استمتعنا بالعشاء .	كيفنا عالعشا.	استانسنا بالعشا.	Aram	استمتعنا	كيفنا
19654	corpus-6-test-corpus-26-train	سأذهب بك على مقعدك . من هنا ، من فضلك .	راح اوديك على كرسيك. من هون، لو سمحت.	راح اوديك على كرسيك. من هون، لو سمحت.	Aram							MSA
6411	corpus-6-test-corpus-26-train	سأعود إليك عندما تكون أقل انشغالاً .	راح أرجعلك بس تكون مش مشغول كثير.	راجعلك لما تكون أقل مشغول.	Aram	أعود	أرجع
12101	corpus-6-test-corpus-26-train	أنا السيد تكاهاشي بالغرفة رقم خمسة تسعة وأربعين . من فضلك أرسل أربع زجاجات من بيرة بودفايزر .	أنا الأستاذ تكاهاشي بالأوضة رقم ٥٩ . لو سمحت بدي أربع بطولين من البيرة بودفايزر.	أنا الأستاذ تكاهاشي بالأوضة رقم ٥٩ . لو سمحت بدي أربع بطولين من البيرة بودفايزر.	Aram							MSA
10930	corpus-6-test-corpus-26-train	حسنا ، إنه وقت الغداء . هل تحب أن نناقشه على الغداء ؟	ماشي، وقت الاكل صار. بتحب نحكي عنها واحنا ناكل؟	ماشي، وقت الاكل صار. بتحب نحكي عنها واحنا ناكل؟	Aram							MSA
2324	corpus-6-test-corpus-26-train	هناك الكثير من الينابيع الحارة .	في كثير ينابيع حارة.	فيه كتير عيون ماي حارة.	Aram	هناك	في
11595	corpus-6-test-corpus-26-train	سر مباشرة ، من فضلك .	روح ع طول، لو سمحت.	روح ع طول، لو سمحت.	Aram							MSA
13719	corpus-6-test-corpus-26-train	هل تمانع إذا التقطت صورة لك ولسيارتك الأجرة ؟	بتمانع لو أخذت صورة إلك وللتكسي تبعتك؟	بتمانع لو صورتك وصورت سيارة الأجرة تبعتك؟	Aram	التقطت	أخذت			سيارة أجرة : تكسي		MSA
13532	corpus-6-test-corpus-26-dev	كم من الوقت نحتاج للذهاب مشياً من هنا إلى مبنى البلدية ؟	قديش بدنا وقت عشان نمشي من هون لبناية البلدية؟	أديش بدنا وقت عشان نمشي من هون لبناية البلدية؟	Aram	مبنى	بناية					MSA
565	corpus-6-test-corpus-26-train	هل تستطيع أن تخفض سعرها لوجود بعض البقع بها ؟	بتقدر ترخصها لأنه في عليها شوية بقع؟	بتقدر تنزل بسعرها لانه فيها بعض البقع؟	Aram	تخفض سعرها	ترخصها
177	corpus-6-test-corpus-26-test	شكراً ، هذا يكفي .	شكراً ، هاظ بكفي.	مشكور، هادي بكفي.	Aram	هذا	هاظ
1418	corpus-6-test-corpus-26-train	أريد الشخص الذي يعد وثائق عادية في حجم ورقة الخطاب بدون الحاجة إلى طيهم .	بدي الشخص اللي بعمل الوثائق اللي بحجم الورق العادي بدون ما يظطر يثنيهم.	بدي الشخص اللي بيعمل اوراق عادية بحجم ورقة الخطاب بدون ما يحتاج إنو يطويهم.	Aram	يعد	بعمل	يحتاج	يظطر
5323	corpus-6-test-corpus-26-train	هل نحتاج إلى طرح هذا للتصويت ؟ إن لم نكن في حاجة إلى هذا ، فإمكاني أن أعتقد حينئذ أننا قد وصلنا إلى نتيجة , سأقوم بإرسالها إلى مجلس إدارتنا صباح غد .	هل احنا محتاجين نحط هاظ للتصويت؟ اذا لأ، بتوقع أنه وصلنا للنتيجة، بدي أبعثها لمجلس ادارتنا بكرا الصبح.	بدنا نحط هاي عالتصويت؟ لو ما كنا محتاجين ، ممكن أفكر هيك أنا احنا وصلنا لنتيجة، راح أرسلها لمجلس ادارتنا بكرة الصبح.	Aram	نطرح	نحط
8316	corpus-6-test-corpus-26-train	أين مترو الأنفاق ؟	وين المترو؟	وين الميترو؟	Aram
14863	corpus-6-test-corpus-26-train	كنت أفكر في الحصول على هذه الدورة في فترة نصف العام المقبلة .	كنت بفكر أوخذ هالكورس بفترة نص السنة الجاية.	كنت بفكر أخذ هالكورس بفترة نص السنة الجاية.	Aram	المقبلة	الجاية	أحصل	أوخذ			MSA
719	corpus-6-test-corpus-26-train	الخامس عشر من سبتمبر يوم احترام المسنين .	خمسطعش تسعة هو يوم احترام المسنين.	الخمس عشر من سبتمبر يوم احترام الكبار.	Aram	خامس عشر	خمسطعش
16770	corpus-6-test-corpus-26-train	ارفعوا أيديكم .	ارفعوا إيديكو	سوّوا إيدكم فوق.	Aram	يد	إيد					MSA
16607	corpus-6-test-corpus-26-train	أين موقف الحافلات ل بي ؟	وين مجمع الباصات ل بي ؟	وين موقف الباصات ل عندي؟	Aram	موقف	مجمع					MSA
18226	corpus-6-test-corpus-26-train	قم بدفعها من فضلك , إن كان ذلك ممكنا .	لو سمحت دزها , إذا بصير	دفعها اذا بتقدر من فضلك.	Aram	دفع	دز	ممكن	بصير			MSA
18355	corpus-6-test-corpus-26-train	لقد نسيت أن آخذ حقيبتي اليدوية .	نسيت آخذ شنتة الإيد.	نسيت أخذ حقيبتي الصغيرة.	Aram	يدوي	إيد					MSA
15950	corpus-6-test-corpus-26-test	فكرة صائبة . متى تخطط للمجيء ؟	فكرة صحيحة. متى بتنوي تيجي؟	فكرة صحيحة. إيمتا بتنوي تجي؟	Aram	تخطط	تنوي	صائبة	صحيحة			MSA
11885	corpus-6-test-corpus-26-train	اثنان ويسكي مع الماء , من فضلك .	تنين ويسكي مع مية, لو سمحت.	تنين ويسكي مع مية, لو سمحت.	Aram							MSA
3649	corpus-6-test-corpus-26-train	على فكرة , هل أنت غير مشغول السبت القادم ؟	بالمناسبة، راح تكون فاضي السبت الجاي؟	على رأيي, انت ما الك فضاوة السبت الجاي؟	Aram	غير مشغول	فاضي
16291	corpus-6-test-corpus-26-train	هل لديك هذا باللون الأخضر الداكن ؟	عندك هاذ باللون الاخضر الغامق؟	عندك هذا بلون الأخضر الغامق؟	Aram	داكن	غامق					MSA
18847	corpus-6-test-corpus-26-train	هالو ، هل هذه تعود إلى روي ؟	مرحبا، هاي لروي؟	مرحبا، هاي رجعت لروي؟	Aram	هالو	مرحبا					MSA
10733	corpus-6-test-corpus-26-train	أريد حامل ثلاثي .	بدي حامل ثلاثي.	بدي حامل ثلاثي.	Aram							MSA
10756	corpus-6-test-corpus-26-train	عظيم . كنت أبحث عن سيارة أجرة لكن هذا أفضل .	كتير حلو. كنت قاعد بدور على تاكسي بس هاي احسن.	كتير حلو. كنت قاعد بدور على تاكسي بس هاي احسن.	Aram							MSA
13446	corpus-6-test-corpus-26-train	ثلاثة اثنان واحد اثنان . انتظر ثانية ، حسنا ؟ أريد أن أرسل لك شيئاً هنا . معذرة .	ثلاثه اثنين واحد اثنين. استناني شوي , طيب؟ بدي أبعثلك اشي هون. اعذرني.	تلاته اتنين واحد اتنين. استناني شوي , زين؟ بدي أبعتلك اشي هون. سامحني.	Aram	انتظرني	استناني					MSA
13946	corpus-6-test-corpus-26-train	حسنا ، إنه باهظ الثمن . إنه لم يصنع في اليابان ، أليس كذلك ؟	تمام ، هو غالي .اكيد مش صنع اليابان، مش؟	عادي ، هو غالي الثمن. مش صنع في يابان، مش كده؟	Aram	حسنا	تمام	باهظ	غالي			MSA
17398	corpus-6-test-corpus-26-train	ويسكي اسكتلندي وماء من فضلك .	ويسكي اسكتلاندي ومية لو سمحت.	وسكي اسكتلاندي ومية بليز.	Aram	ماء	مية					MSA
6800	corpus-6-test-corpus-26-train	هل توجد أية كازينوهات جيدة ؟	في أي كازينوهات حلوة؟	في كازينوهات زينة عنا؟	Aram	جيدة	حلوة
3669	corpus-6-test-corpus-26-train	إنها عاملتني كما لو كنت متسولاُ .	عاملتني كإني شحاد.	هي كانت تعاملني كأني شحاد.	Aram	كما لو كنت	كإني	متسول	شحاد
673	corpus-6-test-corpus-26-train	شخص ما فتح الطرد الخاص بي .	في حد فتح الطرد تبعي.	حدا فتح الباكيت حقي.	Aram	الخاص بي	تبعي	شخص	حد
192	corpus-6-test-corpus-26-train	هل تريد أن افحص موتور السيارة ؟	بدك ياني أفحص ماتور السيارة؟	بدك افحص موتور السيارة؟	Aram	موتور	ماتور
14557	corpus-6-test-corpus-26-train	أنا في نزهة طويلة سيرا على الأقدام .	أني طالعة برحلة طويلة تمشاية عجري.	أنا عم بتمشى رحلة طويلة بالأرجل.	Aram	سيرا	تمشاي	طويلة	رحلة			MSA
5246	corpus-6-test-corpus-26-dev	هذه الأيام ، استخدم الكمبيوتر بشكل دائم في العمل .	هاي الأيام ، أنا بستخدم الكمبيوتر دايماً بالشغل.	هاي الأيام، بستخدم الكمبيوتر دايما في الشغل.	Aram	دائماً	دايماً
18540	corpus-6-test-corpus-26-train	موظفو المبيعات في هذا المتجر لطفاء جداً .	موظفين المبيعات بهاذ المحل لطيفين كثير.	طلاب المبيعات في هالمحل طيبين كتير.	Aram	لطفاء	لطيفين	متجر	محل			MSA
447	corpus-6-test-corpus-26-train	الثاني من على اليسار .	الثاني عالشمال .	التاني من الشمال.	Aram	على	ع
6525	corpus-6-test-corpus-26-train	هل أنزل هنا لمركز روكفيلر ؟	أنزل من هون عمركز روكفيلر؟	هل نْزل هون لمركز روكفيلر؟	Aram
3029	corpus-6-test-corpus-26-train	هذه السيدة كاوازو في غرفة رقم ستة عشر أحدى عشر .	هاي الست كاوازو بالغرفة سطعش إحدعش.	هاي الست كاوازو بالغرفة رقم سدستاشر، إحدى عشر.	Aram	سيدة	ست	إحدى عشر	إحدعش
7391	corpus-6-test-corpus-26-dev	هل تستطيع خفضها حتى عشرين دولار ، من فضلك ؟	بتقدر تنزلها لعشرين دولار، لو سمحت؟	بتقدر توخذها على عشرين دولار، لو سمحت؟	Aram	خفضها	تنزلها
6418	corpus-6-test-corpus-26-train	أشعر بتحسن .	حاس بتحسن.	حاس حالي تحسنت.	Aram	أشعر	حاس
64	corpus-6-test-corpus-26-train	هل يمكنكم صرف الشيك ذو المائتي دولار الخاص بي ؟	بتقدروا تصرفولي الشيك أبو الميتين دولر تاعي؟	ممكن تصرفولي الشيك اللي عندي بقيمة مية دولار؟	Aram	ذو	أبو	مائتي	ميتين
8236	corpus-6-test-corpus-26-train	ولكن لا ضرورة لدفع بقشيش .	بس ما في داعي للبخشيش.	بس ما في داعي تعطي بقشيش.	Aram	بقشيش	بخشيش
10973	corpus-6-test-corpus-26-train	لقد جاء لتوه .	جا هسا.	جا هسا.	Aram							MSA
3318	corpus-6-test-corpus-26-train	لنتصل به .	خلينا نرلنه.	خلينا نتصل فيه.	Aram	نتصل	نرن
398	corpus-6-test-corpus-26-dev	بالمناسبة ، اسمي هيروش إيجيما .	بالمناسبة، اسمي هيروشي ايجيما.	بالمناسبة، اسمي هيروشي إيجيما. باستفتح الكلام، اسمي هيروشي إيجيما.	Aram
17790	corpus-6-test-corpus-26-test	التاسع والعشرون من أغسطس .	تسعه وعشرين من آب.	تسعه وعشرين من آب.	Aram	أغسطس	آب					MSA
1023	corpus-6-test-corpus-26-test	هل لا زال لديكم مقاعد لعرض الليلة ؟	ظل في عندكم محلات لعرض الليلة؟	عندكم ما زال فيه كراسي للعرض الليلة؟	Aram	لا زال	ظل	مقاعد	محلات
3446	corpus-6-test-corpus-26-train	أريد القيام بحجز للساعة الثالثة والنصف ظهراُ .	بدي أعمل حجز للساعة ثلاثة ونص الظهر.	بدي احجز عالساعة تلتة ونص عصرا.	Aram	أقوم	أعمل
11246	corpus-6-test-corpus-26-train	سوف نحضرها الآن . ما هو رقم غرفتك ؟	رح نجيبها هلا . شو رقم غرفتك ؟	رح نجيبها هلا . شو رقم غرفتك ؟	Aram							MSA
2428	corpus-6-test-corpus-26-train	رقم غرفتي هو ثلاثة ستة وعشرين . هل يمكن أن تأخذ الغسيل ؟	رقم غرفتي هو ثلاثة ستة وعشرين. بصير توخذ الغسيل؟	رقم غرفتي هو تلاتة وعشرين ستة. ممكن تاخذ الغسيل؟	Aram	هل يمكن	بصير
2119	corpus-6-test-corpus-26-train	أليس لديك دروس تجريبية ؟	ما عندك كورسات تجريبية؟	ما عندك دروس تجريبية؟	Aram	أليس	ما			درس:كورس
17852	corpus-6-test-corpus-26-train	رحلة الطيران دلتا رقم ثمانية وعشرون والمتجهة إلي نيو أورلينز سوف تتأخر حوالي ساعة .	رحلة الطيارة دلتا رقم ثمانية وعشرين اللي رايحة على نيو أورلينز حتى تتأخر حوالي ساعة.	رحلة الطيارة دلتا رقم تمانية وعشرين اللي رايحة على نيو أورلينز حتى تتأخر حوالي ساعة.	Aram	متجهة	رايحة					MSA
11817	corpus-6-test-corpus-26-dev	هل لديكم غرفة متاحة الليلة ؟	عندكم غرفة فاضية الليلة ؟	عندكم غرفة فاضية الليلة ؟	Aram							MSA
8173	corpus-6-test-corpus-26-train	بصراحة ، لا أتفق مع ذلك .	بصراحة، ما بتفق مع هاظ.	بالصراحة، ما بتفق مع هيك.	Aram	ذلك	هاظ
16073	corpus-6-test-corpus-26-train	هل لك أن تتفضل وتملأ هذه ؟	بتقدر تتكرم و تعبي هاي؟	بتقدر تعبي هاي؟	Aram	تتفضل	تتكرم	تملأ	تعبي			MSA
16042	corpus-6-test-corpus-26-train	يبدو أن النقود التي أعطيتني إياها ناقصة عشر دولارات .	شكله المصاري اللي إنطيتني اياها ناقصة عشر دولارات.	بتبين إنه الفلوس اللي أعطيتني اياها ناقصة عشر دولارات.	Aram	أعطيتني	إنطيتني					MSA
16822	corpus-6-test-corpus-26-test	بالخارج .	برا.	برا.	Aram	خارج	برا					MSA
5224	corpus-6-test-corpus-26-train	أريد ما يخصني لكي أرحل .	بدي اللي بخصني مشان أروح.	بدي الي بخصني عشان أطلع من هون.	Aram	لكي	مشان	أرحل	أروح
2368	corpus-6-test-corpus-26-test	هل يمكن أن ترسلها إلى عنواني في اليابان عن طريق بريد الطرود الدولي وتحصل الثمن من هناك ؟	ممكن توديها على عنواني باليابان عن طريق صفحة الطرود الدولي و توخذ حقه من هناك ؟	بتقدر تبعتها على عنواني باليابان بالبريد العالمي وتاخد الفلوس من هناك؟	Aram	ترسلها	توديها	بريد	صفحة
6574	corpus-6-test-corpus-26-train	أين قسم السيدات ؟	وين قسم النسوان؟	وين قسم الستات؟	Aram	سيدات	نسوان
15257	corpus-6-test-corpus-26-test	إنه ألم حاد .	هو وجع قوي.	هاي حسة قوية.	Aram	حاد	قوي					MSA
5289	corpus-6-test-corpus-26-train	إنني في نفس السن .	أني بنفس العمر.	أنا بنفس العمر.	Aram	سن	عمر
19500	corpus-6-test-corpus-26-test	فكرة جميلة .	فكرة حلوة.	فكرة حلوة.	Aram	جميلة	حلوة					MSA
6167	corpus-6-test-corpus-26-train	هل الأجانب يمكنهم الحصول على الكتب في المكتبة ؟	بقدروا الأجانب يستخدموا الكتب بالمكتبة؟	الأجانب بيقدروا يجيبوا كتب من المكتبة؟	Aram	يمكنهم	بقدروا
13707	corpus-6-test-corpus-26-train	تحية . أنا جون .	مرحبا. أني جون.	كيف الحال؟ أنا جون.	Aram							MSA
11174	corpus-6-test-corpus-26-train	هل يمكن أن نبدأ اللعب عندما ينتهون ؟	بنقدر نبلش نلعب لما يخلصوا؟	بنقدر نبلش نلعب لما يخلصوا؟	Aram							MSA
13471	corpus-6-test-corpus-26-test	مائة وخمسة وثلاثون ين للدولار الواحد .	مية وخمسة وثلثين ين للدولار الواحد.	مية وخمسة وتلتين ين للدولار الواحد.	Aram	ثلاثون	ثلثين					MSA
512	corpus-6-test-corpus-26-train	نعم . انتظر , سوف احضر لك واحدة .	طيب. استنى، راح أجيبلك وحدة.	أه، استنى، راح جيبلك وحدة.	Aram	أحضر	أجيب	انتظر	استنى
13076	corpus-6-test-corpus-26-train	هلا أنزلتني عند فندق هلتون من فضلك ؟	ممكن تنزلني عند فندق الهيلتون لو سمحت؟	ممكن توصلني عند فندق الهيلتون لو سمحت؟	Aram	أنزلتني	تنزلني					MSA
786	corpus-6-test-corpus-26-train	أين الاستعلامات الرياضية ؟	وين الاستعلامات الرياضة؟	وين المعلومات الرياضية ؟	Aram	أين	وين
6810	corpus-6-test-corpus-26-train	هذه هي فلوس أقلام الحبر . فاتورة بمائة دولار .	هايذ حق قلام الحبر. فاتورة بمية دولار.	هاي هي فلوس أقلام الحبر. فاتورة بمية دولار.	Aram	اقلام	قلام
2772	corpus-6-test-corpus-26-train	لا ، شكراً . من الأفضل أن لا أشرب المزيد .	لا، شكراً. احسنلي ما أشرب اكثر من هيك.	لا، شكرًا. أحسن ما أكمل شرب.	Aram	المزيد	اكثر
11544	corpus-6-test-corpus-26-train	بما في ذلك الإفطار ، والضريبة ، ورسم الخدمة ، سيكون الحساب خمسة أربعون دولارا للشخص الواحد في الليلة .	بتشمل الفطور، الضرايب، ورسم الخدمة، الحساب رح يكون خمسة وأربعين دولار للواحد في الليلة.	بتشمل الفطور، الضرايب، ورسم الخدمة، الحساب رح يكون خمسة وأربعين دولار للواحد في الليلة.	Aram							MSA
3638	corpus-6-test-corpus-26-test	ما عرض الأوبرا اليوم ؟	شو عرض الأوبيرا اليوم؟	شو الأوبرا اللي عرضت اليوم؟	Aram	أوبرا	أوبيرا
11708	corpus-6-test-corpus-26-train	أريد مقعداً يطل على الممر ، من فضلك .	بدي كرسي يطل عالممر، لو سمحت.	بدي كرسي يطل عالممر، لو سمحت.	Aram							MSA
12074	corpus-6-test-corpus-26-test	أجل أريد شيئاً أقرؤه .	أيوا بدي إشي أقراه.	أيوا بدي إشي أقراه.	Aram							MSA
8690	corpus-6-test-corpus-26-train	غير محتمل بدرجة كبيرة .	بنطاقش بدرجة كبيرة.	مش ممكن بشكل كبير.	Aram	محتمل	بنطاق
15362	corpus-6-test-corpus-26-train	هل تعرف المطعم يا كيويا ؟	بتعرف المطعم يا كيويا؟	بتعرف المطعم يا اخوي؟	Aram							MSA
1047	corpus-6-test-corpus-26-train	يستطيع الصرافون أن يغيروا دولاراتك من أجل بقشيش الكازينو . هل نذهب ؟	السمسارين بقدروا يصرفولك الدولرات عشان بخشيش الكازينو. بصير نروح؟	الصرّافين بقدروا يغيّروا دولاراتك عشان زبط للكازينو. بنروح ؟	Aram	صرافون	سمسارين	بقشيش	بخشيش
370	corpus-6-test-corpus-26-train	يسعدنا أن نقدم لك الشراب الذي تريده متبوعاً بالغداء . دليل كامل بالمشروبات التي نقدمها على رحلتنا موجودة في دليل المعلومات الخاص بمجلتنا .	بسعدنا إنه نقدملك العصير اللي بتختاره وبيلحقه الغدا . منوفر قائمة كاملة من الشراب في هاي الرحلة موجودة بقسم المعلومات تاع مجلتنا.	منبسطين نهنيلك الشراب اللي بدك ياه بعديه بالغدا. بالمجلة عنا دليل كامل للمشروبات اللي منعملها بالرحلة، فشوف بدليل المعلومات.	Aram	شراب	عصير	خاص	تاع
1194	corpus-6-test-corpus-26-train	هل أستطيع تأجير أداة للتنفس أثناء السباحة ؟	بقدر أستأجر شغلة للتنفس خلال السباحة؟	بقدر أجر أداة تنفس وقت السباحة؟	Aram	أداة	شغلة	اثناء	خلال
2005	corpus-6-test-corpus-26-train	آه . هل يمكنني الحصول على وجبتي فيما بعد ؟ أنا أشعر أنني لست على ما يرام الآن .	ممم. ممكن أخد وجبتي بعدين؟ حاسس حالي مش على بعضي هسا.	آه. بقدر أخد وجبتي بعدين؟ حاسس حالي مش مرتاح هلا.	Aram	فيما بعد	بعدين
423	corpus-6-test-corpus-26-train	ما هو رقم الرحلة الجوية ؟	شو رقم رحلة الطيران؟	شو رقم الرحلة الطيارة؟	Aram	ما	شو
5431	corpus-6-test-corpus-26-train	أبغي تأجير سيارة من هذا الطراز لمدة يومين .	بدي استأجر سيارة من هاذ الموديل لمدة يومين.	بدي أجر سيارة من هالنوع ليومين.	Aram	أبغي	بدي			طراز :موديل
599	corpus-6-test-corpus-26-train	أنا غير متأكد إذا كنت قد حزمت ملابس كافية لرحلة مدتها ثلاثة أيام .	أنا مش متأكد اذا جهزت وعية بتكفيني لرحلة مدتها ثلاث أيام.	أنا مش متأكد اذا حزمت هدوم كافية لرحلة ثلاث أيام.	Aram	حزمت	جهزت	ملابس	وعية
17504	corpus-6-test-corpus-26-train	يوجد بجانب هذا المبني تحديداً .	هو جنب هاذ المبنى بالتحديد .	عم بفرجي يمين هاض المبنى بالضبط.	Aram	جانب	جنب					MSA
15577	corpus-6-test-corpus-26-dev	هه . هذه . يبدو اللون جميلاً عليك .	هه. هاي. شكل اللون حلو عليك كثير.	هه. هاي. شكل اللون حلو عليك كثير.	Aram	يبدو	شكل					MSA
1834	corpus-6-test-corpus-26-train	هل أستطيع تناول غذائي الآن ؟	ممكن أوكل هسا؟	بأقدر أكل أكلي الحين؟	Aram	أتناول	أوكل
1361	corpus-6-test-corpus-26-dev	هل يتوقف القطار في برايتون ؟	بوقف القطار عند برايتون؟	بتوقف القطار ببرايتون؟	Aram	في	عند
9316	corpus-6-test-corpus-26-dev	من المهم جدا أننا نستطيع الوصول إلى المواد الخام التي نحتاجها في المشروع .	اشي كثير مهم إنه قدرنا نوصل لمجموعة المواد الأساسية اللي راح نحتاجها للمشروع.	مهم كتير إنه نقدر نوصل للمواد الأولية اللي بنحتاجها بالمشروع.	Aram	خام	أساسية
8193	corpus-6-test-corpus-26-train	أود أن أطلب بدلة داكنة من أجلي .	بدي أطلب بدلة لونها غامق عشاني.	بدي أطلب بدله غامقة لحالي.	Aram	من أجلي	عشاني	داكن	غامق
1235	corpus-6-test-corpus-26-train	هذا جيد . متى هو ؟	هيك تمام. متى رح يكون؟	هاي زينة. إيمتا هي ؟	Aram	جيد	تمام
681	corpus-6-test-corpus-26-train	أرغب في شراء شامبو .	أنا بدي أشتري شامبو.	بدي اشتري شامبو.	Aram	أرغب	بدي
19838	corpus-6-test-corpus-26-dev	خمسون جنيهاً .	خمسين قنيه.	خمسين دينار.	Aram	جنيه	قنيه					MSA
15529	corpus-6-test-corpus-26-dev	لا يوجد رسم ضروري .	مش موجود رسم ظروري.	مش موجود رسم لازم.	Aram	ضروري	ظروري					MSA
5367	corpus-6-test-corpus-26-train	هل كان لديك أية خدمات أخرى إلى جانب طعام الإفطار هذا الصباح ؟	في عندك أي خدمات ثانية غير فطور الصبح؟	هل كان عندك أي خدمات تانية غير الفطور الصبح؟	Aram	إفطار	فطور	إلى جانب	غير
16810	corpus-6-test-corpus-26-train	متى يفتح المصرف ؟	أميت بفتح البنك؟	إيمتا بيفتح البنك؟	Aram	متى	أميت					MSA
10160	corpus-6-test-corpus-26-train	إجمالي المبلغ المطلوب مائتان وثلاثة وأربعون جنيه ، يا سيدتي .	المبلغ الكلي بطلع ميتين وثلاثة وأربيعين جنيه، يا مدام.	المجموع الكامل اللي عليكي هو مية ومية وتلاتة وأربعين دينار، يا ستي.	Aram	سيدة	مدام	إجمالي	كلي
1630	corpus-6-test-corpus-26-train	لماذا لم يأت إلى الحفلة أمس ؟	ليش ما اجى على الحفلة امبارح؟	ليش ما اجا عالحفلة امبارح؟	Aram	أمس	امبارح	يأت	إجى
2516	corpus-6-test-corpus-26-train	أريد لفتان من ISO مائة ، فيلم ملون ، ستة وثلاثين لقطة ، من فضلك .	بدي لفتين أيزو مية، فلم ملون، ستة وثلاثين لقطة ، لو سمحت.	بدي رول من ISO مية، فيلم ملون، ستة وتلاتين صورة، لو سمحت.	Aram	لفتان	لفتين	مائة	مية
4475	corpus-6-test-corpus-26-train	هل لديك مرآة ؟	عندك مراية؟	عندك مراية؟	Aram	مرآة	مراية
15296	corpus-6-test-corpus-26-train	هل من المقبول عدم اتباع أي شخص لتعليمات الأمن ؟	بصير حدا ما يتبع تعليمات الأمن؟	بيجوز حدا ما يتبع تعليمات الأمن؟	Aram	مقبول	بصير	شخص	حدا			MSA
8824	corpus-6-test-corpus-26-dev	علىّ أن ألحق بطائرة العاشرة صباحاً .	لازم ألحق طيارة الساعة عشرة الصبح.	لازم ألحق الطيارة الساعة عشرة الصبح.	Aram	طائرة	طيارة
12615	corpus-6-test-corpus-26-train	من اين يمكنني الحصول على مسكوكة لركوب المترو ؟	من وين ممكن أجيب تذكرة لأركب المترو؟	من وين ممكن أجيب تذكرة لأركب المترو؟	Aram							MSA
859	corpus-6-test-corpus-26-train	أين يمكنني تغير نقودي ؟	وين بقدر أصرف مصاريي؟	وين بقدر أغير فلوسي؟	Aram	تغير	أصرف	نقود	مصاري
19726	corpus-6-test-corpus-26-train	هل بها جهاز تدفئة ؟	بيها جهاز تدفئة؟	فيها تدفئة؟	Aram	بها	بيها					MSA
7626	corpus-6-test-corpus-26-train	أريد بعض الكريم الليلي .	بدي كريم ليلي.	بدي شوية كريم لليل.	Aram
12973	corpus-6-test-corpus-26-train	كم تتقاضى ثمنا لإرسالها لليابان ؟	قديش بدك توخذ عشان تبعثها على اليابان؟	ادايش بدك تاخذ عشان تبعتها على اليابان؟	Aram	تتقاضى	توخذ	ترسلها	تبعثها			MSA
957	corpus-6-test-corpus-26-dev	أكيدا التي تتحدث معك ، أنا عندي حجز مائدة في تمام الساعة السادسة والثلث هذا المساء . ولكني آسفة لأني سأصل متأخرة نصف ساعة .	أكيدا يلي بتحكي. عندي حجز طاولة عالساعة ستة و ثلث المسا. بس آسفة لإني رح أوصل متأخرة نص ساعة.	اظبطك اللي بحكي معك، عندي حجز طاولة الساعة ستة وربع اليوم بالليل. بس انا آسفة لأني رح وصل متأخرة نص ساعة.	Aram	مائدة	طاولة	في تمام	ع
4365	corpus-6-test-corpus-26-train	متي سنستقل القارب ؟	متى بدنا نركب القارب؟	إمتى رح نركب القارب؟	Aram	نستقل	نركب
650	corpus-6-test-corpus-26-train	أرغب في غرفة بحمام .	بدي غرفة بحمام.	بدي غرفة مع حمام.	Aram	ارغب	بدي
18036	corpus-6-test-corpus-26-train	معذرة , متي ينتهي هذا الفيلم ؟	عفواً, متى بخلص هذ الفلم؟	معليش, إمتى بخلص هالفيلم؟	Aram	ينتهي	بخلص	معذرة	عفواً			MSA
12777	corpus-6-test-corpus-26-test	لقد تمكنت من تحقيق ذلك .	قدرت أوصل لهذا الشي.	قدرت أوصل لهذا الشي.	Aram							MSA
9542	corpus-6-test-corpus-26-train	هل هو طريق طويل ؟	هو الطريق طويل؟	هو الطريق طويل؟	Aram
17177	corpus-6-test-corpus-26-train	ما هي الأنواع التي لديكم ؟	شو الأنواع اللي عندكم؟	شو الأنواع اللي عندكم؟	Aram							MSA
16819	corpus-6-test-corpus-26-train	سأرتبك . هل تمانع في رسم خريطة لي ؟	رح أرتبك. ما عندك مشكلة ترسملي خريطة؟	رح أرتبك. ما عندك مشكلة ترسملي خريطة؟	Aram							MSA
16365	corpus-6-test-corpus-26-train	لدينا جمبري رائع جداً اليوم .	عنا جمبري مميز كثير اليوم.	عندنا جمبري مميز كثير اليوم.	Aram	رائع	مميز	لدينا	عنا			MSA
7860	corpus-6-test-corpus-26-train	هل لديك أيّ خرائط بسيطة للمدينة ؟	عندي أي خرايط بسيطة للمدينة؟	عندك خرايط بسيطة للمدينة؟	Aram	خرائط	خرايط
10238	corpus-6-test-corpus-26-train	معذرة أريد الذهاب إلى فندقي في المدينة بالحافلة . أين يمكن أن أستقل حافلة ؟	عفواً، أنا بدي أروح على الفندق موجود بالمدينة بالباص. من وين بقدر آخذ باص؟	معلش، بدي اروح على الفندق تبعي في المدينة بالباص. وين بقدر اركب باص؟	Aram	أستقل	آخذ
3892	corpus-6-test-corpus-26-train	شكراً . لكنني لا أعتقد أن عندي وقت للإقامة لمدة ليلتين . هل يمكنك حجز غرفة بسريرين لي في ذلك الفندق ليلة الثاني عشر من مارس فقط ؟	شكراً ، بس ما بتوقع أنه معي وقت عشان أظل ليلتين. ممكن تحجزلي غرفة مزدوجة في الفندق لليلة اثنعش ثلاث بس؟	مشكور. بس مش معتقد إنه عندي وقت حتى أضل لمدة ليلتين. ممكن تحجزلي غرفة بسريرين بذاك الفندق بس ليلة الثاني عشر من آذار؟	Aram	مارس	ثلاث	أعتقد	بتوقع
2401	corpus-6-test-corpus-26-train	بالتأكيد . كيف يمكننا خدمتك ؟	أكيد. كيف منقدر نخدمك؟	أكيد. كيف ممكن نساعدك؟	Aram	يمكننا	منقدر
15247	corpus-6-test-corpus-26-train	شيكات سياحية . شكراً . خذ تذكرتك وبطاقة المرور للصعود على متن الطائرة . كن هناك قبل وقت الرحلة بساعة من فضلك .	شيكات سياحية. شكراً. أخذ تذكرتك و الفيزا عشان تطلع على الطيارة. كون هناك قبل الرحلة بساعة لو سمحت.	شيكات سياحية. مرحبا. خذ تذاكرك و الباصبور عشان تطلع على الطيارة. كون هون قبل الرحلة بساعة لو سمحت.	Aram	طائرة	طيارة	خذ	أخذ	بطاقة مرور :فيزا		MSA
2702	corpus-6-test-corpus-26-train	أوافق . يجب أن تصبح طبيعية جداً .	أنا موافق. لازم تصير طبيعة كثير.	موافق. لازم تصير طبيعية كتير.	Aram	تصبح	تصير	جداً	كثير
12345	corpus-6-test-corpus-26-train	أهذه عيادة إف ؟	هاي عيادة إف؟	هاي عيادة إف؟	Aram							MSA
1124	corpus-6-test-corpus-26-train	هل لك أن تغيرهم إلى دولارات من فضلك ؟	ممكن تحولي اياهم لدولارات، لو سمحت؟	ممكن تغيرهم لدينار؟ لو سمحت؟	Aram	تغير	تحول
16238	corpus-6-test-corpus-26-train	حسناً . أراك الساعة الثانية يوم الأحد .	تمام . بشوفك الساعة ثنتين يوم الأحد.	زين. بشوفك الساعة الثنية يوم الأحد.	Aram	حسناً	تمام	أراك	بشوفك			MSA
6864	corpus-6-test-corpus-26-train	هل يمكنك أن تشذب شاربي ؟	ممكن لو سمحت ترتبلي شواربي؟	بتقدر تشذبلي شاربي؟	Aram	تشذب	ترتب	شاربي	شواربي
2519	corpus-6-test-corpus-26-train	أود أن أصرف هذا الشيك بسبعين دولاراً .	بدي أصرف هاذ الشيك بقيمة سبعين دولر.	بدي أصرف هالشيك بسبعين دولار.	Aram
14761	corpus-6-test-corpus-26-train	الجزء المكتوب بالطريقة المائلة يشير إلى التغييرات التي حدثت في التسعينات .	الجزء اللي مكتوب بالطريقة المايلة بدل على التغييرات اللي صارت بالتسعينات.	الجزء اللي مكتوب بالطريقة الخزاعة بيشير على التغييرات اللي صارت بالتسعينات.	Aram	مائلة	مايلة	يشير	بدل			MSA
19912	corpus-6-test-corpus-26-train	هل تشمل هذه الرحلة زيارة لبرج سيرز ؟	بتشمل هاي الرحلة زيارة لبرج سيرز؟	بتشمل هاي الرحلة زيارة على برج سيرز؟	Aram							MSA
793	corpus-6-test-corpus-26-test	أين ستنتهي الجولة ، ومتى ؟	وين راح تخلص الرحلة، و أميت؟	وين رح تخلص الجولة، وإمتى؟	Aram	تنتهي	تخلص	جولة	رحلة
285	corpus-6-test-corpus-26-train	تفضل هذان دولاران . احتفظ بالباقي .	تفظل هي دولرين. خلي الباقي إلك.	خذ هاي دولارين. دير الباقي عندك.	Aram	احتفظ	خلي	تفضل	تفظل
14820	corpus-6-test-corpus-26-train	هل يوجد أي محل متعدد الأقسام قريب من هنا ؟	في أي مول قريب من هون؟	بتعرف أي دكان بيعطي كل الأغراض قريب من هون؟	Aram	هنا	هون			محل متعدد الأقسام : مول		MSA
16805	corpus-6-test-corpus-26-train	هل ستزال تعمل جدول المواعيد ؟	هل رح تظل جدول المواعيد شغّالة؟	هل رح يضل الجدول المواعيد شغّال؟	Aram	تزال	تظل					MSA
4479	corpus-6-test-corpus-26-train	سوف آخذ هذه ، من فضلك .	راح آخذ هاظ ، لو سمحت.	رح خذ هاي، لو سمحت.	Aram	سوف	راح
7381	corpus-6-test-corpus-26-train	يقولون أن اليابان دولة غنية جداً .	بقولوا أنه اليابان بلد غني.	بحكوا إنو اليابان بلد غنية كتير.	Aram	يقولون	بقولوا
18282	corpus-6-test-corpus-26-train	ملعقتين , من فضلك .	معلقتين , لو سمحت.	تنين ملاعق, لو سمحت.	Aram							MSA
15323	corpus-6-test-corpus-26-train	أجل ، واحدة فقط . متى سأعرف ؟ وكيف سيتم تعويضي ؟	أها، بس وحدة؟ متى رح أعرف؟ وكيف رح يكون التعويض؟	أها، بس وحدة؟ إمتى رح أعرف؟ وكيف رح يكون التعويض؟	Aram	يتم	يكون	أجل	أها			MSA
5	corpus-6-test-corpus-26-train	هناك ، أمام بيانات السائح تماما .	هناك ، قدام بيانات السايح بالزبط .	هنيك، قدام معلومات السايح تمام.	Aram	أمام	قدام	تماما	بالزبط
14120	corpus-6-test-corpus-26-train	أين أجد الاسطوانات المدمجة ؟	وين بلاقي السيديات؟	وين بلاقي السيديات؟	Aram	إسطوانات مدمجة	سيديات					MSA
11442	corpus-6-test-corpus-26-train	أنا متأثر للغاية , لا أستطيع البقاء ساكنا .	أنا متأثر كتير, ما قادر أضل ساكت.	أنا متأثر كتير, ما قادر أضل ساكت.	Aram							MSA
11479	corpus-6-test-corpus-26-train	هل هو قريب لنصل إليه سيراً .	هو قريب عشان نوصلو مشي؟	هو قريب عشان نوصلو مشي؟	Aram							MSA
12732	corpus-6-test-corpus-26-train	إني من إسبانيا .	أنا من إسبانيا.	أنا من إسبانيا.	Aram							MSA
688	corpus-6-test-corpus-26-train	ـ أين أقرب محل جزارة ؟	وين أقرب لحام؟	وين أقرب دكان لحمة؟	Aram	جزار	لحام
13291	corpus-6-test-corpus-26-train	أود تأجير هذا الطراز من السيارات لمدة أربعة وعشرين ساعة .	بدي أستأجر هاذ الموديل من السيارات لمدة أربع وعشرين ساعة.	بدي أكرّي هالطراز من السيارات لمدة أربع وعشرين ساعة.	Aram					طراز سيارات :موديل		MSA
6914	corpus-6-test-corpus-26-train	لا يمكن أن أبيع هذه دون روشتة .	ما بقدر أبيع هاي بدون وصفة طبية.	ما فيني أبيع هاد بدون وصفة.	Aram	روشتة	وصفة
19327	corpus-6-test-corpus-26-train	هل لديك صحف يابانية ؟	عندك جرايد يابانية؟	عندك جرايد يابانية؟	Aram	صحف	جرايد					MSA
10953	corpus-6-test-corpus-26-train	هل هذا الحذاء متين ؟	هاذ البوط قوي؟	هاذ البوط قوي؟	Aram							MSA
7957	corpus-6-test-corpus-26-train	لكنّي لدى موعد لرؤيتها في السّاعة الثّانية .	بس أنا عندي موعد عشان أشوفها الساعة ثنتين.	بس عندي موعد اشوفها الساعة الثانية.	Aram
19509	corpus-6-test-corpus-26-dev	هل لديك غرف أكبر ؟	عندك غرف أكبر؟	عندك غرفة أكبر؟	Aram							MSA
13202	corpus-6-test-corpus-26-train	اعطني عامل التليفون من فضلك .	إعطيني عامل التلفون لو سمحت .	عطيني الشغله حقت التلفون، لو سمحت.	Aram	اعطني	إعطيني					MSA
16016	corpus-6-test-corpus-26-train	ظننت أنكم أيها الشباب تأكلون الكعك المخبوز فقط .	فكرت إنكو يا شباب بتوكلوا الكعك المخبوز بس.	فتكرت إنكو يا شباب بتاكلوا الكيك المشوي بس.	Aram	ظننت	فكرت					MSA
15083	corpus-6-test-corpus-26-train	أريد استئجار كرسي مركب .	بدي أستأجر كرسي اتمدد عليه.	بدي أكرّر كرسي العربسة.	Aram	أسترخي	اتمدد					MSA
4082	corpus-6-test-corpus-26-test	أنا أبحث عن شيء أنيق .	أني بدور على اشي لايق.	أنا عم بدور على اشي شيك.	Aram	أنيق	لايق	أبحث	بدور
17356	corpus-6-test-corpus-26-train	حسناً . هل يجب أن أقوم بتركيزها ؟	ماشي. لازم أساويها مركزة؟	ماشي. لازم اعملها مركزة؟	Aram	أقوم	أساويها					MSA
13424	corpus-6-test-corpus-26-test	قهوة مع القشدة والسكر ، من فضلك .	قهوة مع القشطة والسكر، لو سمحت.	قهوة مع القشطة والسكر، لو سمحت.	Aram	قشدة	قشطة					MSA
13824	corpus-6-test-corpus-26-test	سوف ننتظر . من فضلك اتصل بنا عندما تكون مستعداً .	رح نستنى . لو سمحت, إتصل فينا لما تكون جاهز.	رح نستنى . لو سمحت, كلمنا لما تكون جاهز.	Aram	مستعد	جاهز	عندما	لما			MSA
1007	corpus-6-test-corpus-26-train	فقط سياحة .	بس للسياحة.	بس سياحة.	Aram	فقط	بس
7057	corpus-6-test-corpus-26-train	أحتاج إلى طيب .	بدي دكتور.	بدي طيب.	Aram	طبيب	دكتور	أحتاج	بدي
13476	corpus-6-test-corpus-26-train	إن الجونلات القصيرة ومعها الأحذية الطويلة لن تنقضي موضتها .	مش ممكن تخلص موضة التنانير القصيرة مع الجزم الطويلة.	مش ممكن يخلص موضت الجونلات القصيرة وكمان الأحذية الطويلة.	Aram	تنقضي	تخلص	جونلات	تنانير			MSA
8495	corpus-6-test-corpus-26-train	ألا ترغب في فنجان شاي ؟	ما بدك تشرب كاسة شاي؟	ما بدك كوب شاي؟	Aram	ترغب	بدك	ألا	ما
540	corpus-6-test-corpus-26-train	ليس تماماً . فقط شيء ما غير غالي الثمن .	مش هيك. بس إشي مش غالي.	مش تماماً. بس شي بسيط مش غالي السعر.	Aram	غير	مش	شيء	إشي
8788	corpus-6-test-corpus-26-train	إذا كنت تودّ ، بإمكاننا الاستراحة هنا .	إذا إنت حاب، ممكن نستريح هون.	لو بدك، فينا نرتاح هون.	Aram
13938	corpus-6-test-corpus-26-train	هل هذه كلها هي حقائبك ؟	هاي كلها شناتيك؟	هاي الشنط كلهم متاعك؟	Aram	هذه	هاي					MSA
2238	corpus-6-test-corpus-26-train	هل تريد بالحلويات ؟	بدك حلويات؟	بتحب تاكل حلويات؟	Aram	تريد	بدك
1433	corpus-6-test-corpus-26-test	نعم ، لكن ليس قويا جدا .	اه ، بس مش قوي كثير.	أيوه، بس مش قوي كتير.	Aram	نعم	اه	جدا	كثير
11342	corpus-6-test-corpus-26-train	ويسكي وماء ، من فضلك . هل لديكم وجبة خفيفة معه ؟	ويسكي ومي، لو سمحت. عندكم سندويشة صغيرة او شيء خفيف معه؟	ويسكي ومي، لو سمحت. عندكم سندويشة صغيرة او شيء خفيف معه؟	Aram							MSA
3780	corpus-6-test-corpus-26-train	أتعرف كاثي ؟ إنه عيد ميلادها .	بتعرف كاثي؟ هاي حفلة عيد ميلادها.	بتعرف كاثي؟ هلا عيد ميلادها.	Aram
14484	corpus-6-test-corpus-26-train	أود تحميض هذا الفيلم . متي سيكون جاهزا ؟	بدي أحمض هالفلم. متى رح يكون جاهز؟	بدي أحومض هالفيلم. إمتى رح يكون جاهز؟	Aram	فيلم	فلم					MSA
11879	corpus-6-test-corpus-26-train	تشغل أشخاصاً جدد في أبريل .	رح توظف ناس جداد في نيسان.	رح توظف ناس جداد في نيسان.	Aram							MSA
18451	corpus-6-test-corpus-26-train	سأكون سعيدا بذلك . متى ترغب في ذلك ؟	رح اكون مبسوط لهالشي. متى بدك ياه؟	رح اكون مبسوط لهالشي. إمتى بدك ياها؟	Aram	سعيد	مبسوط					MSA
15126	corpus-6-test-corpus-26-train	رائع .	بجنن.	عظيم.	Aram	رائع	بجنن					MSA
16217	corpus-6-test-corpus-26-train	من فضلك اتجه يساراً عند التقاطع التالي .	لو سمحت روح عاليسار بالتقاطع الجاي.	لو سمحت روح عاليسار بالتقاطع الجاي.	Aram	التالي	الجاي	اتجه	روح			MSA
13118	corpus-6-test-corpus-26-dev	هلا أريتني بعض الفساتين ؟	ممكن توريني شوي من الفساطين؟	ممكن توريني شوي من الفساتين؟	Aram	فساتين	فساطين	أريتني	توريني			MSA
86	corpus-6-test-corpus-26-train	أين المقهى ؟	وين الكوفي شوب ؟	وين الكافيه؟	Aram	أين	وين			مقههى : كوفي شوب
4497	corpus-6-test-corpus-26-train	لا يمكنك جلب الألعاب النارية إلى كندا .	ما بتقدر تجيب ألعاب نارية على كندا.	ما تقدر تجيب الألعاب النارية لكندا.	Aram	تجلب	تجيب
7289	corpus-6-test-corpus-26-train	اعتقد أن هذا عالي قليلا بالنسبة لي .	بتوقع أنه شوي عالي بالنسبة الي.	أظن هاي شوي طالعة علي.	Aram	قليلا	شوي
2578	corpus-6-test-corpus-26-test	لم يعد بإمكانك حقيقةً أن تقوم بعمل تصميم دون كمبيوتر بعد الآن .	بطلت تقدر تعمل تصميم بدون كمبيوتر من هون و طالع.	ما عاد فيك فعلاً تعمل تصميم بدون كمبيوتر هسة.	Aram	لم يعد	بطل	بعد الآن	من هون وطالع
9073	corpus-6-test-corpus-26-train	أريد اسطوانة مدمجة .	بدي سي دي.	بدي سي دي.	Aram					إسطوانة مدمجة : سي دي
3900	corpus-6-test-corpus-26-dev	هل يمكنني حجز غرفة بسريرين تطل على المحيط ؟	بصير أحجز غرفة بتختين بطل على البحر؟	ممكن أحجز غرفة بسريرين تطل على البحر؟	Aram	هل يمكنني	بصير
9385	corpus-6-test-corpus-26-train	مايومي , هل تسمح أن تملأ هذه الورقة بتوقيعك ؟	مايومي، ممكن تعبيي هاي الورقة بتوقيعك؟	مايومي، ممكن تعبي هاي الورقة بتوقيعك؟	Aram
9605	corpus-6-test-corpus-26-train	هلا أرشدتني إلى مطعم مفضل بين الشبان ؟	ممكن ادلني على مطعم معروف بين الشباب؟	ممكن تدلني على مطعم بحبوه الشباب؟	Aram	شبان	شباب	أرشدتني	ادلني
17094	corpus-6-test-corpus-26-train	حجزنا مقعداً ليوم الخامس والعشرين من أكتوبر في الساعة الحادية عشر صباحاً .	حجزنا مقعد لخمسة و عشرين من شهر عشرة الساعة احدعش الصبح.	حجزنا مكان للخمسة و العشرين من تشرين الأول الساعة الحداش سبحان.	Aram	أكتوبر	عشرة					MSA
12773	corpus-6-test-corpus-26-train	إن الناس ودودون جداً .	الناس حابيين كثير.	الناس حابيين كثير.	Aram							MSA
4624	corpus-6-test-corpus-26-train	متى يتعين علي أن أكون في المحطة ؟	أي وقت لازم أكون بالمحطة؟	إمتى لازم أكون بالمحطة؟	Aram	يتعين علي	لازم
13116	corpus-6-test-corpus-26-train	ليس هذا صحيحاً . أنت دائما تعاملني .	هاظ مش صحيح . إنت دايما بتعاملني.	مش صحيح هاي. انت دايما بتعاملني.	Aram	هذا	هاظ	دائما	دايما			MSA
17765	corpus-6-test-corpus-26-train	ما نوع العصير الذي تفضله ؟	شو نوع العصير اللي بتحبه ؟	شو نوع العصير اللي بتحبه ؟	Aram	بتفضله	بتحبه					MSA
12069	corpus-6-test-corpus-26-train	هل لي في بعض الفلفل ؟	ممكن أخذ شوي فلفل؟	ممكن أخذ شوي فلفل؟	Aram							MSA
9955	corpus-6-test-corpus-26-train	احتاج إلى بعض الهدايا التذكارية من نيويورك .	أنا بدي شوية هدايا تذكارية من نيويورك.	بدي شوية تذكارات من نيويورك.	Aram
4985	corpus-6-test-corpus-26-train	اسمي " تارو تاناكا " لدي حجز مسبق .	اسمي " تارو تاناكا " عندي حجز من قبل.	إسمي "تارو تاناكا"، عندي حجز من قبل.	Aram	مسبق	من قبل
7636	corpus-6-test-corpus-26-train	إنها الثالثة والربع .	الساعة ثلاثة وربع.	هي تلاتة وربع.	Aram
18643	corpus-6-test-corpus-26-train	كم التكلفة كلها ؟	قديش الكلفة كلها؟	أديش الكلفة كلها؟	Aram	كم	قديش					MSA
8907	corpus-6-test-corpus-26-dev	لا أدري كم من النقود يجب علىّ تركه كبقشيش ؟	ما بعرف قديش لازم أترك بغشيش.	مش عارف كم من الفلوس لازم أتركها كتيبس؟	Aram	أدري	بعرف
7549	corpus-6-test-corpus-26-train	سآخذ شيكولاتة ساخنة .	بدي آخذ هوت شوكليت.	رح أاخد شوكولاته سخنة.	Aram					شيكولاتة ساخنة : هوت شوكليت
5364	corpus-6-test-corpus-26-train	ماذا تنوي أن تفعل عقب الانتهاء من المدرسة . ؟	شو بتخطط تعمل بعد ما تخلص مدرسة؟	شو رايح تعمل بعد ما تخلص من المدرسة؟	Aram
12551	corpus-6-test-corpus-26-train	أشعر بالغثيان .	بحس حالي بدي أتقيء.	بحس حالي بدي أتقيء.	Aram							MSA
7198	corpus-6-test-corpus-26-dev	ماذا ؟ هل عليك دفع ضرائب عندما يكون لديك أكثر من ثلاثة زجاجات كحول ؟	شو؟ عليك ضرايب بس يكون عندك أكثر من ثلاث قناني كحول؟	شو؟ لازم تدفع ضرايب لما يكون عندك أكتر من تلاتة بوطلات عرق؟	Aram	زجاجات	قناني	ضرائب	ضرايب
14266	corpus-6-test-corpus-26-train	لقد حصلت على بطارية فارغة .	بطاريتي صارت فاضية.	صارت عندي بطارية فاضية.	Aram	فارغة	فاضية					MSA
14147	corpus-6-test-corpus-26-train	معذرة . أنا طالب جامعي من اليابان . هل أنتم طلاب في جامعة نيويورك ؟	معلش، أنا طالب جامعي من اليابان. إنتوا طلاب بجامعة نيو يورك؟	معلش، أنا طالب جامعة من اليابان. إنتوا طلاب في جامعة نيو يورك؟	Aram	انتم	إنتو					MSA
11901	corpus-6-test-corpus-26-train	من الذي يعزف ؟	مين اللي عم يعزف؟	مين اللي عم يعزف؟	Aram							MSA
10760	corpus-6-test-corpus-26-train	معطف رائع . هل هو صناعة بريطانية ؟	جاكيت حلو. هاد صنع بريطاني؟	جاكيت حلو. هاد صنع بريطاني؟	Aram							MSA
3765	corpus-6-test-corpus-26-dev	هل لديكم فيلم شفاف ملون ؟	عندك فلم شفاف ملون؟	عندكم فيلم شفاف ملون؟	Aram	فيلم	فلم
6812	corpus-6-test-corpus-26-train	أين قسم السيدات ؟	وين قسم النسوان؟	وين قسم الستات؟	Aram	نساء	نسوان
15419	corpus-6-test-corpus-26-train	جميل الفستان التي ترتدينه .	حلو الفسطان اللي لابسيته.	زينة الفستان اللي لابساه.	Aram	ترتديه	لابسيته	فستان	فسطان			MSA
3619	corpus-6-test-corpus-26-test	تموج شعر دائم مشدود من فضلك .	كيرلي عطول مشدود، لو سمحت.	بدي تمويج دايم لشعري لو سمحت.	Aram	دائم	عطول			تموج شعر: كيرلي
10065	corpus-6-test-corpus-26-train	هل لدينا وقت كاف لإنهاء إجراءات المغادرة ؟	معنا وقت كافي لنخلص إجراءات المغادرة؟	عنا وقت كافي نكمل فيه اجراءات الطلعة؟	Aram	كاف	كافي	إنهاء	نخلص
8098	corpus-6-test-corpus-26-train	هل هناك جولة بالحافلة تجوب المدينة ؟	في دورة بالباص نلف بالبلد؟	في طواف بالباص بتدور بالمدينة ؟	Aram	جولة	دورة	نجوب	نلف
7612	corpus-6-test-corpus-26-test	هل أستطيع الحصول على تذكرة متعددة الاستخدام ؟	ممكن أوخذ بطاقة ذكية؟	بقدر أجيب تذكرة متعددة الاستعمال؟	Aram	أحصل	أوخذ
10824	corpus-6-test-corpus-26-train	كان فيلم " حرب الكواكب " أكثر الأعمال شعبية عام ألف وتسعمائة وأربعة وثمانون .	كان فيلم "حرب الكواكب" من أشهر الأفلام سنة ألف وتسعمائة وأربعة وثمانون.	كان فيلم "حرب الكواكب" من أشهر الأفلام سنة ألف وتسعمائة وأربعة وثمانون.	Aram							MSA
10084	corpus-6-test-corpus-26-train	أوه ، يجب أن تخطر القنصلية على الفور .	أوه، لازم تبلغ القنصلية هسا.	أها ، لازم تخبر القنصلية هسا بالضبط.	Aram	تخطر	تبلغ
15400	corpus-6-test-corpus-26-train	هل يوجد ملهى ليلي جيد به عرض رقصة الفلامنكو ؟	في نايت كلوب رايق عنده رقصة الفلامنكو؟	في ملهى ليلي مزبوط عنده عرض رقصة الفلامنكو؟	Aram	جيد	رايق				ملهى ليلي : نايت كلوب	MSA
15062	corpus-6-test-corpus-26-train	لماذا لم تقلع الرحلة ؟ أخبرني عما يجري .	ليش ما طلعت الرحلة؟ قلي شو بصير.	ليش ما اقلعت الرحلة؟ قولي شو بصير.	Aram	يجري	بصير	أقلعت	طلعت			MSA
15380	corpus-6-test-corpus-26-train	سأصبح بديناً في حال ما ظللت جالساً هنا آكل باستمرار .	رح أصير ناصح لو استمريت قاعد هون آكل دايما.	رح صير سمين لو استمريت يعني جالس هون آكل دايما.	Aram	أصبح	أصير	بدين	ناصح			MSA
15088	corpus-6-test-corpus-26-test	هل على السيدات ارتداء فستان سهرة ؟	لازم الستات يلبسن فسطان سهرة؟	بتلازم السيدات يلبسوا فستان سهرة؟	Aram	ارتداء	لبس	سيدات	ستات			MSA
16581	corpus-6-test-corpus-26-train	حسنا إذاً ، أريد عصا مضرب أصغر كتلك التي مع جوليا روبرتس .	ماشي يعني، بدي عصاة مضرب اصغر مثل اللي مع جوليا روبرتس.	ماشي يعني، بدي عصاة مضرب اصغر من اللي مع جوليا روبرتس.	Aram	إذاً	يعني	عصا	عصاة			MSA
12952	corpus-6-test-corpus-26-train	أريد أن اتصل هاتفياً بالسفارة اليابانية .	بدي أحكي بالتلفون مع السفارة اليابانية.	بدي أحكي بالتلفون مع السفارة اليابانية.	Aram					هاتف : تلفون		MSA
16962	corpus-6-test-corpus-26-test	هل هذه السجائر معتدلة ؟	هاي السقاير معتدلة؟	هاي السجاير معتدلة؟	Aram	سجائر	سقاير					MSA
17636	corpus-6-test-corpus-26-train	هل هذا طلب شخص آخر .	هاظا طلب واحد ثاني؟	هاد طلب حدا ثاني؟	Aram	شخص	واحد	هاذ	هاظا			MSA
12790	corpus-6-test-corpus-26-test	في حالة إمكان ذلك , احجز منضدة بالقرب من النافذة من فضلك .	لو في امكانية, احجزلي طاولة عند الشباك لو سمحت.	لو في امكانية, احجزلي طاولة عند الشباك لو سمحت.	Aram							MSA
9098	corpus-6-test-corpus-26-train	هل يمكن أن نحجز طاولة لخمسة أشخاص ؟	ممكن نحجز طاولة لخمس أشخاص؟	ممكن نحجز طاولة لخمسة أشخاص؟	Aram
680	corpus-6-test-corpus-26-train	شركة الخطوط الجوية اليابانية ، طائرة رقم واحد اثنان ثلاثة .	شركة الخطوط الجوية اليابانية، رحلة الطيران رقم واحد اثنين ثلاثة.	شركة الطيران اليابانية، الطيارة رقم واحد تنين تلاتة.	Aram	اثنان	اثنين
12140	corpus-6-test-corpus-26-train	من فضلك اتصل بي في الفندق عندما تجد حقائبي .	من فضلك، كلمني بالفندق لما تلاقي شنطي.	من فضلك، كلمني بالفندق لما تلاقي شنطي.	Aram							MSA
8342	corpus-6-test-corpus-26-train	ذلك الحد الأدنى للسعر .	هيك أقل سعر.	هاي أقل سعر.	Aram	أدنى	أقل
13269	corpus-6-test-corpus-26-train	أنت محظوظ .	إنت محظوظ.	انت محظوظ.	Aram	أنت	إنت					MSA
6836	corpus-6-test-corpus-26-dev	هل سيكون هذا المتجر مفتوحاً غداً ؟	راح يكون هاظ المحل فاتح بكرا؟	هل رح يكون هاذا المحل مفتوح بكرة؟	Aram	مفتوح	فاتح	متجر	محل
15463	corpus-6-test-corpus-26-train	وصلت الفاتورة لمائة دولار .	وصلت الفاتورة لمية دولار.	وصلت الفاتورة لمية دولار.	Aram	مائة	مية					MSA
488	corpus-6-test-corpus-26-train	هل هذا مكتب الاستقبال ؟ هل يوجد عيادة قريبة ؟	هاظ مكتب الاستقبال؟ في عيادة قريبة من هون؟	هاي المكتب الاستقبال؟ في عيادة جنبنا؟	Aram	يوجد	في
1276	corpus-6-test-corpus-26-train	كم عمر ابنتك ؟	قديش عمر بنتك؟	أديش عمر بنتك؟	Aram	كم	قديش
11862	corpus-6-test-corpus-26-train	لن ينضم للجولة الاختيارية إلا القليل من الناس .	ما رح ينضم للجولة الاختيارية غير شوي من الناس.	ما رح ينضم للجولة الاختيارية غير شوي من الناس.	Aram							MSA
9687	corpus-6-test-corpus-26-train	إنها مجرد هدية تعبيرا عن تقديري .	هاي مجرد هدية تعبير عن تقديري.	هاي بس هدية لأشكر فيها جميلك.	Aram
16896	corpus-6-test-corpus-26-train	تحتاج لرؤية أخصائي .	بتحتاج تشوف دكتور متخصص.	لازم تشوف دكتور متخصص.	Aram							MSA
8454	corpus-6-test-corpus-26-train	كم تكلّف هي لكل جالون ؟	كم سعر الغلون الواحد؟	أديش بتكلفلك لكل جالون؟	Aram
12650	corpus-6-test-corpus-26-train	أيمكنني الحصول على جدول زمني ، من فضلك ؟	ممكن أحصل على جدول الوقت، لو سمحت؟	ممكن أحصل على جدول الوقت، لو سمحت؟	Aram							MSA
5009	corpus-6-test-corpus-26-train	لقد سُرقت حقيبتي .	انسرقت شنتتي.	سارقولي جنطتي.	Aram	سرقت	انسرقت
17847	corpus-6-test-corpus-26-train	نستخدم الأعواد عندما نأكل .	بنستعمل العيدان لما بنوكل.	بنستعمل الأعواد لما بناكل.	Aram	أعواد	عيدان					MSA
3404	corpus-6-test-corpus-26-train	حسناً ، في حالة إصرار كليكما , سأذهب معكما .	طيب، اذا انتو الاثنين مصرين، أني راح اروح معكو.	ماشي، اذا اصريتوا انتو الاثنين، رح اروح معكم.	Aram	في حالة	إذا	معكم	معكو
3872	corpus-6-test-corpus-26-test	في أي محطة سأنزل للذهاب إلى مبنى إمباير ستيت ؟	بأي موقف لازم انزل عشان أروح على عمارة امباير ستيت؟	بأي محطة بدي انزل عشان اروح على بناية إمباير ستيت؟	Aram	مبنى	عمارة
10680	corpus-6-test-corpus-26-train	لابد أن تأخذها تسعة وتسعون مرة في اليوم ، قبل الوجبات .	لازم تاخذها تسعة وتسعين مرة باليوم، قبل الأكل.	لازم تاخذها تسعة وتسعين مرة باليوم، قبل الأكل.	Aram							MSA
9263	corpus-6-test-corpus-26-train	لا يا سيدي . هذه الظهيرة محجوزة بالكامل . ومع ذلك يمكن أن تحجز غدا .	لا، يا أستاذ، اليوم بعد الظهر كله محجوز. لكن بتقدر تحجز بكرا .	ما في يا معلم، الظهر هاي كله حجوزات. بس ممكن تحجز بكرة.	Aram	بالكامل	كله	ظهيرة	الظهر
8509	corpus-6-test-corpus-26-train	هل هناك طبيب للفندق أو واحد على صلة بالفندق .	في دكتور للفندق أو واحد ع علاقة بالفندق؟	في دكتور للفندق أو واحد ليه علاقة بالفندق؟	Aram	صلة	علاقة
19068	corpus-6-test-corpus-26-train	المياه الساخنة ليست ساخنة بالقدر الكافي .	المية الحامية مش حامية بشكل كافي.	المية الحاكية مش حاكية بشكل كافي.	Aram	قدر	شكل	ساخنة	حامية			MSA
4729	corpus-6-test-corpus-26-train	هل استرحت في نومك ؟	ارتحت بالنومة؟	بترتاحت بنومك؟	Aram	استرحت	ارتحت
14905	corpus-6-test-corpus-26-train	أريد إعادة المال . هل يمكن أن أحصل على مالي ؟	بدي أرجع المصاري. بقدر أوخذ مصرياتي؟	بدي أرجع الفلوس. ممكن أقدر أخذ فلوسي؟	Aram	أعيد	أرجع	مالي	مصرياتي			MSA
14718	corpus-6-test-corpus-26-train	انها باتجاه الجنوب .	هي باتجاه الجنوب.	هيه باتجاه الجنوب.	Aram							MSA
16034	corpus-6-test-corpus-26-train	ما سعر تذكرة درجة أولى إلى إدنبره , من فضلك ؟	كم سعر تذكرة درجة أولى لإدنبره , إذا تكرمت.	أديش سعر تذكرة درجة أولى لإدنبره؟ تكرم.	Aram							MSA
6657	corpus-6-test-corpus-26-train	عندي قشعريرة .	عندي قشعيرية.	عندي رعشة.	Aram	قشعريرة	قشعيرية
1682	corpus-6-test-corpus-26-test	لماذا , شكرا جزيلا . هل أستطيع الارتقاء للقمة ؟	ليش، شكراً كثير الك. بقدر اطلع للقمة؟	ليش , شكرا كتير . ممكن اطلع على القمة؟	Aram	أرتقي	أطلع	جزيلا	كثير
11938	corpus-6-test-corpus-26-dev	لا . هل تحب الإبلاغ عنه ؟	لا . بدك تبلغ عنو ؟	لا . بدك تبلغ عنو ؟	Aram							MSA
333	corpus-6-test-corpus-26-test	من فضلك غير هذه الينات إلى جنيهات .	لو سمحت اصرفلي هظول من ين لقنيه.	من فضلك غير هالدينارات لجنيهات.	Aram	غير	اصرفلي	جنيه	قنيه
7335	corpus-6-test-corpus-26-train	سآخذ مقاعد درجة رجال أعمال ، أليس كذلك ؟	راح آخد مقاعد درجة رجال الأعمال، صح؟	رح خذ مقاعد درجة رجال الأعمال، مو هيك؟	Aram	أليس كذلك	صح
773	corpus-6-test-corpus-26-train	لا أستطيع أن أفعل ذلك , لكني سوف أضعها في الحقيبة لك .	ما بقدر اعمل هيك , بس رح احطها بالشنتة الك .	ما بقدر اعمل هيك, بس رح حطها بالشنطة الك.	Aram	أفعل	أعمل	بقدر	أستطيع
19475	corpus-6-test-corpus-26-train	إنه غالي الثمن إلى حد ما . ألا يمكنك منحي خصماً ؟	هاد كثير غالي. ما فيك تعطيني شوية خصم؟	هاد كثير غالي. ما فيك تعطيني شوية خصم؟	Aram	تمنحني	تعطيني					MSA
12562	corpus-6-test-corpus-26-test	إن " السنة " متقلقلة .	ال"سنة" عم تتقلب.	ال"سنة" عم تتقلب.	Aram							MSA
9011	corpus-6-test-corpus-26-train	سيكون جاهزا بعد غد في المساء .	راح يكون جاهز بعد بكرا المسا.	رح يكون جاهز بعد بكرا بالليل.	Aram
13920	corpus-6-test-corpus-26-train	هل ليدكم صناديق لإرسال الطرود ؟	عندكم علب لارسال الطرود ؟	عندكم علب لارسال الطرود ؟	Aram	صناديق	علب					MSA
19050	corpus-6-test-corpus-26-train	إن عثرت على شيء ، اتصل بي من فضلك .	لو لقيت إشي، رنلي إذا تكرمت.	لو لقيت إشي، كلمني تكرم.	Aram	عثرت	لقيت					MSA
11378	corpus-6-test-corpus-26-train	أود تقصيره ببوصة واحدة من هذه المنطقة .	بدي اقصّره بوسطة وحدة من هادي المنطقة.	بدي اقصّره بوسطة وحدة من هادي المنطقة.	Aram							MSA
11976	corpus-6-test-corpus-26-train	هل لديكم أي خبز ؟	عندكم خبز؟	عندكم خبز؟	Aram							MSA
17899	corpus-6-test-corpus-26-test	أود بعض البيجامات .	بدي بيجامات.	بدي بعض البيجامات.	Aram							MSA
19623	corpus-6-test-corpus-26-train	أين يمكنني طباعة الفيلم ؟	وين بقدر أطبع الفلم؟	وين بقدر أطبع الفيلم؟	Aram	فيلم	فلم					MSA
4974	corpus-6-test-corpus-26-train	أيمكنك الحضور إلى هنا لإصلاحه ؟	ممكن تيجي هون عشان اتصلحه؟	ممكن تيجي هون تصلحه؟	Aram	تصلح	اتصلح
3334	corpus-6-test-corpus-26-train	أين يمكنني أن أستقل حافلة لمشاهدة المعالم ؟	من وين ممكن اركب باص لحتى اتفرج ع المعالم؟	وين بقدر أركب باص عشان أشوف الأماكن الحلوة ؟	Aram	أشاهد	أتفرج	أستقل	اركب
12364	corpus-6-test-corpus-26-train	مرحبا يا سيدة ياماجوتشي ؟ فريقك على الخط . قبلت دعوتك . استمر من فضلك .	أهلا وسهلا يا سيدة ياماجوتشي، فريقك عم يكلمك. رديت على دعوتك. استمري، من فضلك.	أهلا وسهلا يا سيدة ياماجوتشي، فريقك عم يكلمك. رديت على دعوتك. استمري، من فضلك.	Aram							MSA
206	corpus-6-test-corpus-26-train	هل لك أن تساعدني في الوصول إلى حقيبتي ؟	ممكن تساعدني ألاقي شنتيتي؟	ممكن تساعدني اوصل لشنتتي؟	Aram	حقيبتي	شنتيتي
12672	corpus-6-test-corpus-26-train	آسف لقد نفذ هذا الصنف لدينا .	معذرة، هاد النوع خلص عنا.	معذرة، هاد النوع خلص عنا.	Aram							MSA
14336	corpus-6-test-corpus-26-train	ما اسم الشخص الذي تود التحدث إليه ؟	شو اسم الشخص اللي بدك تحكي معه؟	شو اسم الشخص اللي بدك تحكي معه؟	Aram	الذي	اللي	تتحدث	تحكي			MSA
18409	corpus-6-test-corpus-26-test	لقد اجتزت هذا الاختبار بنجاح كبير .	عديت الامتحان بنجاح كبير .	عديت هالاختبار بنجاح فلة.	Aram	اجتزت	عديت	اختبار	امتحان			MSA
9788	corpus-6-test-corpus-26-train	طبقاً لتقرير الطقس ، فإن غداً سيشهد سقوط جليد .	بناءً على النشرة الجوية، راح تثلج بكرا.	بحسب تقرير الجو، بكرة رح يصير تساقط للجليد.	Aram	طبقاً	بناءً	تقرير	نشرة
1663	corpus-6-test-corpus-26-dev	لا أستطيع ضبط اللوحة .	مش قادر أزبط الصورة.	مش قادر أضبط اللوحة.	Aram	ضبط	ازبط
14400	corpus-6-test-corpus-26-test	لا زالت غالية جدا . هل من الممكن أن آخذها بثلاثة دولارات ؟	بعدها غالية كثير. ممكن أشتريها بـثلث دولارات؟	لساتها غالية كثير. ممكن أشتريها بـ 3 دولارات؟	Aram	لا زالت	بعدها					MSA
12495	corpus-6-test-corpus-26-train	نريد اثنين هامبورجر واثنين قهوة ، من فضلك ، نريد تناولها خارج المحل .	بدنا زوج همبرجر وزوج قهوة، لو سمحت، بدنا ناكلها برة المحل.	بدنا زوج همبرجر وزوج قهوة، لو سمحت، بدنا ناكلها برة المحل.	Aram							MSA
12968	corpus-6-test-corpus-26-train	زدني قليلاً .	زيدني شوي.	زيديني شوي.	Aram	زد	زيد					MSA
16311	corpus-6-test-corpus-26-train	هل لي بشوكة أخرى ؟	بدي شوكة ثانية؟	بدي شوكة تانية؟	Aram							MSA
9450	corpus-6-test-corpus-26-train	أنا هنا في مهمة إعلامية .	أنا هون بشغل إعلامي.	أنا هون بمهمة صحفية.	Aram	مهمة	شغل
4848	corpus-6-test-corpus-26-train	إنها ليست أحدث طراز ، أليس كذلك ؟	هاي مش أحدث موديل ، صح؟	مش أحدث موديل، مش هيك؟	Aram	طراز	موديل	أليس كذلك	صح
9906	corpus-6-test-corpus-26-train	أبغي بعض الأقراص المنومة .	بدي حبوب منوم.	بدي شوية حبوب للنوم.	Aram	أقراص	حبوب
11412	corpus-6-test-corpus-26-train	أي حافلة تذهب إلى وسط المدينة ؟	أي باص رايح عالدوار الرئيسي؟	أي باص رايح عالدوار الرئيسي؟	Aram							MSA
10778	corpus-6-test-corpus-26-train	أريد الذهاب إلى مركز هارفارد . هل يمكن أن تخبرني عندما نصل إلى هناك ؟	بدي اروح على مركز هارفارد. ممكن تقلي لما نوصل هناك؟	بدي اروح على مركز هارفارد. ممكن تقلي لما نوصل هناك؟	Aram							MSA
5934	corpus-6-test-corpus-26-dev	أريد أن أحجز على شركة نورث وست إيرلينز على الرحلة رقم صفر ثمانية ستة في الخامس .	بدي احجز على شركة نورث وست إيرلينز على الرحلة رقم صفر ثمانية ستة بخمسة الشهر.	بدي احجز مع شركة نورث وست إيرلينز للرحلة رقم صفر تمانية ستة بالخامس.	Aram	خامس	خمسة
7736	corpus-6-test-corpus-26-train	لقد استمتعت بالوجبة كثيراً جداً .	كثير استمتعت بالوجبة.	إستانست كثير بالأكلة.	Aram
6700	corpus-6-test-corpus-26-train	سيكون هناك تأخير بسيط .	راح يكون في تأخير بسيط.	رح يكون فيه تأخير شوي.	Aram	هناك	في
2389	corpus-6-test-corpus-26-train	فقط إذا كانت ملكك ، سيدي . هاها ، مزحة صغيرة .	بس اذا كانت ملكك ، يا سيدي . ههههههه، هاي مزحة صغيرة.	بس لو كانت ملكك، يا سيدي. ههه، نكتة صغيرة.	Aram	هاها	ههههههه
7550	corpus-6-test-corpus-26-train	نستطيع أن نرتب لتنظيف غرفاتكم .	ممكن نرتب معك عشان تنظيف غرفكم.	ممكن نرتب لتنظيف غرفكم.	Aram
19853	corpus-6-test-corpus-26-test	وما هي المثانة ؟	وشو هي المثانة ؟	وشو هي المثانة ؟	Aram							MSA
16484	corpus-6-test-corpus-26-dev	لا أستطيع النوم جيداً أثناء الليل .	ما قدرت أنام مليح بالليل.	ما بقدر انام منيح بالليل.	Aram	جيد	مليح	أستطيع	قدرت			MSA
11977	corpus-6-test-corpus-26-train	ما هو مستوى مهارتك في عزف الكمان ؟	شو مستواك بعزف الكمان؟	شو مستواك بعزف الكمان؟	Aram							MSA
14903	corpus-6-test-corpus-26-train	ما هي أكثر الأشياء التي تثير اهتمامك الآن ؟	شو أكثر الأشياء اللي بتلفت انتباهك هسا ؟	شو أكتر الأشياء اللي عم تشد انتباهك هلا ؟	Aram	تثير	بتلفت	ما	شو			MSA
14505	corpus-6-test-corpus-26-train	اجعل قصة الشعر تتدلى لأسفل , من فضلك .	خلي قصة الشعر تنزل لتحت، لو سمحت.	خلي شعرك معلق لتحت، لو سمحت.	Aram	تتدلى	تنزل	اجعل	خلي			MSA
16444	corpus-6-test-corpus-26-train	هل لك أن تستدعي لي سيارة أجرة الساعة الثامنة صباح غد ؟	ممكن تجيبلي تكسي بكرا الساعة ثمنية الصبح؟	ممكن تطلعلي تاكسي بكرا الساعة 8 الصبح؟	Aram	غد	بكرا	تستدعي	تجيب			MSA
9688	corpus-6-test-corpus-26-train	هلا ملأت هذا النموذج ؟	ممكن تعبي هاذ النموذج؟	هلو بلأت هالإستمارة ؟	Aram
12608	corpus-6-test-corpus-26-train	أيمكنك الانتهاء من ذلك بعد عشر دقائق ؟	بتقدر تخلص هاي بعد عشر دقايق؟	بتقدر تخلص هاي بعد عشر دقايق؟	Aram							MSA
11069	corpus-6-test-corpus-26-dev	الملح من فضلك .	الملح لو سمحت.	الملح لو سمحت.	Aram							MSA
1037	corpus-6-test-corpus-26-dev	لقد نمت و لم أتيقظ حين رن منبه السادسة و النصف .	نمت و ما صحيت ع منبه الساعة ستة ونص.	نمت و ما صحيت لما دق المنبه الساعة ستة و نص.	Aram	سادسة	ستة	أتيقظ	صحيت
15546	corpus-6-test-corpus-26-train	نحن من أكبر موردي أجهزة الميكروكومبيوتر .	إحنا من أكبر موردين لأجهزة الميكرو كمبيوتر .	إحنا من أكبر مزودين لأجهزة الكمبيوتر الصغيرة.	Aram	نحن	إحنا	موردي	موردين			MSA
5684	corpus-6-test-corpus-26-train	من فضلك أخبرني كيف أملأ بطاقة النزول إلى البر ؟	لو سمحت قلي كيف أعبي بطاقة النزول للبر؟	من فضلك قلي كيف بدي املى بطاقة النزول على البر؟	Aram	أخبرني	قلي	أملأ	أعبي
12060	corpus-6-test-corpus-26-dev	دجاج محمر ، من فضلك .	دجاج مشوي، لو سمحت.	دجاج مشوي، لو سمحت.	Aram							MSA
12167	corpus-6-test-corpus-26-train	أجل ، ولكن هذا كثير جدا ، ولقد شبعت بالفعل .	أيوة، بس هاي كتير كثير ، وأنا صرت أكلت كفاية.	أيوة، بس هاي كتير كثير ، وأنا صرت أكلت كفاية.	Aram							MSA
9176	corpus-6-test-corpus-26-train	لقد أُغلق علي الباب . هل يمكن أن تفتح بابي , من فضلك ؟	ييي تسكر علي الباب . بتقدر تفتحلي الباب، لو سمحت؟	سكر علي الباب. ممكن تفتحلي الباب، لو سمحت؟	Aram	أغلق	تسكر
9822	corpus-6-test-corpus-26-train	بكل تأكيد . سنكون سعداء لفعل هذا .	أكيد. راح نكون مبسوطين نعمل هيك.	أكيد. رح نكون مبسوطين نعمل هيك.	Aram	سعداء	مبسوطين
10964	corpus-6-test-corpus-26-train	يقولون إن الأنفلونزا منتشرة هناك .	بيقولوا انو الإنفلونزا معمية هنيك.	بيقولوا انو الإنفلونزا معمية هنيك.	Aram							MSA
13921	corpus-6-test-corpus-26-train	هل ستدفع شركة الطيران رسوم الفندق والوجبات ؟	رح تدفع شركة الطيران رسوم الفندق والوجبات؟	رح تدفع شركة الطيران تكاليف الفندق والأكل؟	Aram	س	رح					MSA
17855	corpus-6-test-corpus-26-train	نسيت تذكرة الطيران الخاصة بي في الفندق .	نسيت تذكرة الطيارة قيتي بالفندق.	نسيت تذكرة الطيارة حقتي في الفندق.	Aram	الخاصة بي	قيتي					MSA
14709	corpus-6-test-corpus-26-train	هل يمكن أن احصل على احدى المجلات أو شيئ من هذا القبيل ؟	ممكن أوخذ وحدة من المجلات أو شي زي هيك؟	ممكن أخذ وحدة من المجلات أو شي زي هيك؟	Aram	قبيل	زي	احصل	أوخذ			MSA
9094	corpus-6-test-corpus-26-train	تناسبني تماما .	مناسبيتني كثير.	بتلبقلي تمام.	Aram	تماماً	كثير
16829	corpus-6-test-corpus-26-test	خذني إلى المستشفى .	خذني على المستشفى.	خذني على المستشفى.	Aram							MSA
8741	corpus-6-test-corpus-26-train	ربما كان يعاني سّدَّة تنفسية .	ممكن عنده صعوبة بالتنفس.	يمكن كان عم يتعب من شدة ع النفس.	Aram	شدة	صعوبة
7583	corpus-6-test-corpus-26-train	كم تكلفة الذهاب إلى فندق سي ؟	قديش بتكلف الروحة لفندق سي؟	أديش بكلف الروحة على فندق سي ؟	Aram	ذهاب	روحة
7386	corpus-6-test-corpus-26-train	هل هناك أي غرف خالية في عربة النوم ؟	ظل في أي غرف فاظية بعرباية النوم؟	فيه أي غرف فاضية بالعربة الي بتناموا فيها؟	Aram	خالية	فاظية
4540	corpus-6-test-corpus-26-test	هل يوجد بوتيك قريب من هنا ؟	في بوتيك قريب من هون؟	في بوتيك قريب من هون؟	Aram
2687	corpus-6-test-corpus-26-train	عندما أرى الأسعار بهذا الرخص ، يبدو الأمر سخيفاً أن أشتري أي شيء في اليابان .	لما أشوف الأسعار بهالرخص ، بحس أنه مسخرة الواحد يشتري أي شي باليابان.	لما بشوف الأسعار بهالرخصة، بصير الأمر غريب إنو أشتري أي اشي في اليابان.	Aram	سخيف	مسخرة
652	corpus-6-test-corpus-26-dev	لم يخرج من الماكينة شيء .	ما طلع من الماكينة إشي.	ما طلع شي من المكنة.	Aram	لم	ما	يخرج	طلع
16758	corpus-6-test-corpus-26-dev	كم كان ثمنها ؟	قديش كان حقها ؟	أديش كانت تكلفتها؟	Aram	ثمنها	حقها					MSA
4451	corpus-6-test-corpus-26-test	أريد هدية بمناسبة الذكرى السنوية .	بدي هدية لمناسبة الذكرى السنوية.	بدي هدية للذكرى السنوية.	Aram	أريد	بدي
3974	corpus-6-test-corpus-26-train	علي أن ألحق طائرة متجهة للوس أنجليس باكر صباح غد .	لازم ألحق طيارة لوس أنجلوس بكرا الصبح بكير.	لازم ألحق بالطيارة اللي رايحة على لوس انجلس بكرا بالصبح.	Aram	باكر	بكير	علي أن	لازم
1766	corpus-6-test-corpus-26-train	يا صاح , أتعرف أي مكان يستحق الرؤية قريبا من هنا ؟	أخوي، بتعرف أي مكان محرز الشوفة قريب من هون؟	يا زلمة، بتعرف مكان بستاهل الشوفة قريب من هون؟	Aram	يستحق	محرز	يا صاح	أخوي
10922	corpus-6-test-corpus-26-train	عندي الكثير من الوقت .	عندي وايد وقت.	عندي وايد وقت.	Aram							MSA
17460	corpus-6-test-corpus-26-train	من أين يمكنني شراء بعض الهدايا التذكارية ؟	منين بقدر أشتري شوية هدايا تذكارية ؟	من وين بقدر أشتري هدايا تذكارية شوي؟	Aram	من أين	منين	بعض	شوية			MSA
14363	corpus-6-test-corpus-26-train	أنظر إلى هذا . انظر إلى هذا . سوف تخبرني أن الاختلاف بين هذا الشاب وذلك الشاب هو الحظ ؟ محمد ، يقف بالسيارة في جانب الطريق ، وأنت ؟ لن تمانع في أن أنام معك هنا . أنا متأخر . كان لقاء جميل معك ؟	شوف هاظ. شوف هاظ. راح تحكيلي انو الفرق بين هالشب وهذاك الشب هو الحظ؟ محمد، واقف بالسيارة على زقاق الشارع، وإنت؟ ما راح تعترض اذا قعدت معك هون. انا تأخرت. كان لقاء حلو معك؟	شوف هاي. شوف هاي. راح تحكيلي انو الفرق بين هالشاب وذاك الشاب هو الحظ؟ محمد، واقف بالسيارة على زقاق الشارع، وانت؟ ما راح تعترض اذا قعدت معك هون. انا تأخرت. كان لقاء حلو معك؟	Aram	انظر	شوف	شاب	شب			MSA
14174	corpus-6-test-corpus-26-train	أعمل في شركة تجارية .	أني بشتغل بشركة تجارية.	أنا بشتغل بشركة تجارية.	Aram	أعمل	بشتغل					MSA
6024	corpus-6-test-corpus-26-test	أفهم ، لكن لا أستطيع أن أقولها .	فاهم، بس بقدر أقولها.	أني فاهم ، بس مش قادر أحكيها.	Aram	أفهم	فاهم	لكن	بس
516	corpus-6-test-corpus-26-train	نصف زجاجة , من فضلك .	نص قنينة ، لو سمحت.	نص زجاجة، لو سمحت.	Aram	نصف	نص	زجاجة	قنينة
13408	corpus-6-test-corpus-26-train	متى تقام مباراة كرة القدم ؟	متى بتبلش مباراة كرة القدم؟	إمتى بتكون مباراة كرة القدم؟	Aram	تقام	بتبلش					MSA
8919	corpus-6-test-corpus-26-dev	ما هو متوسط أسعاركم للفاكس الدولي كل شهر ؟	كم معدل تكلفة الفاكس الدولي كل شهر؟	شو قدر المعدل تبع أثمنة الفاكس العالمي عندكم كل شهر؟	Aram	متوسط	معدل
15087	corpus-6-test-corpus-26-train	انتظر دقيقة من فضلك .	استنى دقيقة لو سمحت.	ستنى دقيقة لو سمحت.	Aram	انتظر	استنى					MSA
18963	corpus-6-test-corpus-26-test	هل هو محجوز بالكامل ؟	هو محجوز كله؟	هو محجوز كله؟	Aram	بالكامل	كله					MSA
2760	corpus-6-test-corpus-26-train	شيء خطأ مع حقيبتك .	اشي غلط بشنتك .	في اشي غلط بشنطتك.	Aram	حقيبتك	شنتك
320	corpus-6-test-corpus-26-train	كلا منا يريد أن يحاسب على وجبته .	إحنا كل واحد بدو يدفع عن أكلته.	كل واحد منّا بده يتحاسب على صحنو.	Aram	وجبته	أكلته
19733	corpus-6-test-corpus-26-train	ألم تتلق الاستمارة بالطائرة ؟	ما أخذت الاستمارة بالطيارة؟	ما إلتقيتش الاستمارة بالطيارة؟	Aram	تتلق	اخذت					MSA
6746	corpus-6-test-corpus-26-train	هل لديك أي شيء لفترة أطول قليلاً ؟	عندك أي اشي لوقت أطول شوي؟	عندك إشي لفترة أطول شوي؟	Aram
19589	corpus-6-test-corpus-26-train	أجل ، من فضلك أرسله إلى الغرفة اثنا عشر أربعة وثلاثون .	أيوه، لو سمحت وديه على الغرفة اثنعش أربعة وثلاثين.	أيوه، لطفاً ارسله على الغرفة اتناشر أربعة وتلاتين.	Aram	أرسله	وديه					MSA
14685	corpus-6-test-corpus-26-train	أين البحيرة ؟	وين البحيرة؟	وين البحيرة؟	Aram							MSA
10116	corpus-6-test-corpus-26-train	هل هناك حافلة تذهب مباشرة إلى هناك ؟	في أي باص بروح هناك مباشرة؟	فيه باص بيروح ع الطول للمكان ؟	Aram
15897	corpus-6-test-corpus-26-train	أريد هذا الطراز لخمسة أماكن مرصعة .	بدي هاي النوعية لخمس أماكن مرصعة.	بدي هاي النوعية لخمسة أمكنة مرصعة.	Aram	طراز	نوعية					MSA
7627	corpus-6-test-corpus-26-train	هل لك أن تغلف هذه كالهدية ؟	ممكن تلفلي هاي كهدية؟	ممكن تغلف هاي زي الهدية؟	Aram	تغلف	تلف
1948	corpus-6-test-corpus-26-train	نعم لدينا هذا ، سوف نجهزها لك .	اه موجود عنا. رح نجهزلك اياه.	أيوه عندنا هاي، رح نجهزها الك.	Aram	نعم	اه
9560	corpus-6-test-corpus-26-train	هل يمكنك تبديل هذه بواحدة جديدة ؟	ممكن تبدلي هاي بوحدة جديدة؟	بتقدر تغيرلي هاي بوحدة جديدة؟	Aram
4558	corpus-6-test-corpus-26-train	عفواً . ستكون جاهزة في غضون خمس دقائق .	عفوا. رح تكون جاهزة خلال خمس دقايق.	معلش. رح تكون جاهزة بعد خمس دقايق.	Aram	في غضون	خلال
6875	corpus-6-test-corpus-26-dev	أين يمكنني أن أشتري إبريقاً ؟	من وين بقدر اشتري بريق؟	وين بقدر اشتري إبريق؟	Aram	إبريق	بريق
7838	corpus-6-test-corpus-26-train	أعتقد أن عمره أكثر من خمسين سنة .	بتوقع عمره اكثر من خمسين سنة.	بظن انو عمرو أكتر من خمسين سنة.	Aram
18273	corpus-6-test-corpus-26-dev	أود أن أطلب , من فضلك .	بدي أطلب , بعد إذنك.	بدي أطلب , بليز.	Aram							MSA
16219	corpus-6-test-corpus-26-dev	معذرة . كيف يمكنني الوصول إلى المصرف ؟	معلش، كيف بقدر أوصل للبنك؟	معلش، كيف بقدر وصل للبنك؟	Aram					مصرف : بنك		MSA
7485	corpus-6-test-corpus-26-train	لدي بعض الملابس للمغسلة .	عندي شوية وعية للغسيل.	عندي شوية هدوم للغسيل.	Aram	ملابس	وعية
4187	corpus-6-test-corpus-26-train	كريمة وسكر ؟	كريمة وسكر؟	كريمة وسكر ؟	Aram
11420	corpus-6-test-corpus-26-train	هل يوجد أي قطار سريع إلى بوسطن ؟	في أي قطار سريع لبوسطن؟	في أي قطار سريع لبوسطن؟	Aram							MSA
8485	corpus-6-test-corpus-26-train	الحجوزات في السابعة ، تحت اسم مانو .	حجوزات الساعة سبعة، بإسم مانو.	الحجز ع السابعة، تحت اسم مانو.	Aram
16547	corpus-6-test-corpus-26-train	أين أفضل مكان لمشاهدة المعالم ؟	وين أحسن مكان لشوفة المناظر؟	وين أحسن مكان لشوفة المعالم؟	Aram	معالم	مناظر	أفضل	أحسن			MSA
6283	corpus-6-test-corpus-26-train	هل يمكنك أن تريني كيف أضع الغاز ؟	ممكن توريني كيف أحط الغاز؟	ممكن توريني كيف احط الغاز؟	Aram	ترني	توريني	أضع	أحط
1098	corpus-6-test-corpus-26-train	علىّ أن أذهب ، سأتصل بك لاحقاً .	أني لازم أروح. رح أحكي معك بعدين.	لازم أروح ، راح أتصل فيك بعدين.	Aram	عليّ أن	لازم	لاحقاً	بعدين
4262	corpus-6-test-corpus-26-train	لا كهرباء .	ما في كهربا.	ما في كهربا.	Aram	كهرباء	كهربا
19250	corpus-6-test-corpus-26-dev	ثلاثون دولاراً وثمانون سنتا .	ثلاثين دولار وثمانين سنت.	تلاتين دولار وتمانين سنت.	Aram							MSA
10078	corpus-6-test-corpus-26-train	هل تعرف طبيب أسنان جيد ؟	بتعرف دكتور اسنان كويس؟	بتعرف دكتور أسنان زين؟	Aram	جيد	كويس
6179	corpus-6-test-corpus-26-train	هل من الممكن أن أمكث في غرفتي حتى الثانية مساءً ؟	ممكن أظل بغرفتي للساعة ثنتين المسا؟	ممكن أضل في غرفتي للساعتين مساءً؟	Aram	أمكث	أظل
19317	corpus-6-test-corpus-26-train	إن حول غرفتي ضجيجا بالغا .	في ضجة كبيرة حوال غرفتي	في هميش غرفتي ضجة كتير.	Aram	ضجيج	ضجة	بالغ	كبير			MSA
761	corpus-6-test-corpus-26-test	كم ستستغرق لكي تطلب ؟	قديش بدك يعني عشان تطلب؟	أديش رح تطول عشان تطلب؟	Aram	لكي	عشان
8696	corpus-6-test-corpus-26-train	معدتي تؤلمني بعد الوجبات .	معدتي بتالمني بعد الوجبات.	معدتي بتوجعني بعد الأكل.	Aram	تؤلمني	بتألمني
15337	corpus-6-test-corpus-26-train	نفضل مائدة بجوار النافذة .	بنحب طاولة جنب الشباك.	بنحب طاولة جنب الشباك.	Aram	نفضل	بنحب	بجوار	جنب			MSA
19307	corpus-6-test-corpus-26-train	كنت على رحلة يونيتد إيرلاينز رقم ثمانية اثنان ثمانية .	كنت برحلة يونايتد إيرلاينز الرقم ثمانية اثنين ثمانية.	كنت عم بسافر على رحلة يونايتد إيرلاينز الرقم تمانية و اثنين تمانية.	Aram							MSA
7767	corpus-6-test-corpus-26-train	هل لك أن ترسم لي خريطة , من فضلك ؟	ممكن ترسملي خريطة، لو سمحت؟	ممكن ترسملي خريطة, لو سمحت؟	Aram
4957	corpus-6-test-corpus-26-train	هل بإمكاني اللمس ؟	بقدر ألمسه؟	ممكن أمسك؟	Aram
13172	corpus-6-test-corpus-26-train	يصعب العثور على هذا المكان . إنه في طريق ضيق يتفرع من الطريق الرئيسي .	صعب يلتقى هالمكان. هو بدخلة بتتفرع من الشارع الرئيسي.	صعب تلقى هالمكان. هو على طريق صغير بينبتع من الشارع الكبير.	Aram	عثور	يلتقى					MSA
13666	corpus-6-test-corpus-26-train	هلا أخذت هذه السراويل ؟	ممكن توخذ هاي البنطلونات؟	بتاخذ هاي البنطلونات؟	Aram	سراويل	بنطلونات	بالتأكيد	أكيد			MSA
91	corpus-6-test-corpus-26-train	حسنا . إنها تتكلف خمسة وثمانون دولارا في البريد العادي وثلاثة دولارات في التوصيل الخاص .	طيب. بتكلف خمسة وثمانين دولر بالبريد العادي وثلاث دولرات بالتوصيل الخاص.	ماشي، رح تكلف 85 دولار بالبريد العادي و3 دولارات بالتوصيل الخاص.	Aram	حسنا	طيب	دولار	دولر
3988	corpus-6-test-corpus-26-train	إذاً يمكنني بكل ثقة أن أزكي برج مدينة سان فرانسيسكو . فهذا يعطيك فكره عن سان فرانسيسكو .	يعني بنصحك عالأكيد ب برج مدينة سان فراسيسكو. رح يعطيك لمحة عن سان فرانسيسكو.	يعني بقدر أحكي بكل ثقة عن برج سان فرانسيسكو. هاد يعطيك فكرة عن سان فرانسيسكو.	Aram	فكرة	لمحة	أزكي	بنصح
2850	corpus-6-test-corpus-26-train	لدي تقدير كبير للموسيقى الكلاسيكية .	كثير بقدر الموسيقى الكلاسيكية.	عندي احترام كبير للموسيقى الكلاسيكية.	Aram
11082	corpus-6-test-corpus-26-train	من فضلك استعمل غرفة القياس هناك .	من فضلك استخدم غرفة القياس هنيك.	من فضلك استخدم غرفة القياس هنيك.	Aram							MSA
12403	corpus-6-test-corpus-26-train	سر في نفس الاتجاه حوالي خمس دقائق ثم لف لجهة اليسار .	امشي بنفس الاتجاه حوالي خمس دقايق و بعدين ارجع على الشمال.	امشي بنفس الاتجاه حوالي خمس دقايق و بعدين ارجع على الشمال.	Aram							MSA
17559	corpus-6-test-corpus-26-train	هل أجعله يعاود الاتصال بك عندما يعود ؟	بتحب أخليه يرجع يرنلك بس يرجع؟	بتحب يرجع يكلمك لما يرجع؟	Aram	عندما	بس	يعاود	يرجع			MSA
7081	corpus-6-test-corpus-26-train	من المرجح أن محبا للإبداع الفني مثلك سيستمتع اللوحات الزيتية غير التقليدية وعروض الموسيقى بالشوارع .	متوقع من محب للابداع الفني مثلك راح ينبسط باللوحات الزيتية والموسيقى وعروض الموسيقى بالشوارع.	أكيد حدا بحب الابداع الفني زيك رح يستمتع باللوحات الزيتية الي مش عادية وعروض الموسيقى بالشوارع.	Aram	مرجح	متوقع	يستمتع	ينبسط
17652	corpus-6-test-corpus-26-test	هل رشحت لي رحلة قصيرة ؟	هل اخترتلي رحلة قصيرة؟	هل اخترتلي رحلة قصيرة؟	Aram	رشحت	اخترت					MSA
18948	corpus-6-test-corpus-26-train	إنها سبعة عشر ايه . اوه ، انا آسف . لقد أخطأت .	هي سبعتعشر ايه . اوه ، أني آسف . غلطت	ما بتعد سبعة عشر بس . اه يعني ، اسف. كان فيي غلط .	Aram	أخطأت	غلطت					MSA
7070	corpus-6-test-corpus-26-train	كم المدة التي قضتها هي حتى الآن في المملكة المتحدة ؟	قديش المدة اللي عاشتها بإنجلترا؟	أديش الوقت الي قضتو هي بالمملكة المتحدة لحد هسة؟	Aram	قضتها	عاشتها			إتجلترا :المملكة المتحدة
8749	corpus-6-test-corpus-26-train	هل قرّرتَ ؟	قررت؟	قررت؟	Aram
1562	corpus-6-test-corpus-26-train	هل نذهب إلى أي مكان متحدثين مثل ذلك ؟	راح نظل نحكي هيك وين ما نروح؟	بدنا نروح على أي مكان واحنا هيك بنحكي؟	Aram	مثل	هيك
9267	corpus-6-test-corpus-26-train	سأذهب كي أسأل البواب عن الأجرة المناسبة .	رايح اسأل البواب عن الأجرة الصحيحة.	راح أروح أسأل البواب عن الأجرة الصح.	Aram	مناسبة	صحيحة
15942	corpus-6-test-corpus-26-train	اللون البني محبب هذا العام .	اللون البني مرغوب هالسنة.	اللون البني مرغوب هالسنة.	Aram	محبب	مرغوب					MSA
2601	corpus-6-test-corpus-26-train	هناك قطع في بلوزتي . أتساءل هل يمكنك أن تخيطيه لي ، من فضلك ؟	في مزع ببلوزتي. بدي اسألك اذا بتقدر تخيطلي اياه، لو سمحت؟	فيه قطع بلوزتي. بتقدري تخيطيها الي، بمننك؟	Aram	قطع	مزع
3304	corpus-6-test-corpus-26-train	هل هذه هي آخر محطة ؟	هاظا آخر موقف؟	هاي هي آخر محطة؟	Aram	محطة	موقف
18974	corpus-6-test-corpus-26-test	هل يمكنني تركها في أي مكان من البلاد ؟	بقدر أسيبها بأي مكان بالبلد؟	بقدر أسيبها بأي مكان بالبلد؟	Aram	بلاد	بلد	أتركها	أسيبها			MSA
10851	corpus-6-test-corpus-26-test	أريد بعض التفاح ، من فضلك .	بدي شوية تفاح، لو سمحت.	بدي شوية تفاح، لو سمحت.	Aram							MSA
5117	corpus-6-test-corpus-26-train	أخشى أن لا يكون هنا أية دورة لتعليم الجولف .	خايف ما يكون في دورة لتعليم الجولف	بخاف ما يكون فيه دورات لتعليم الجولف هون.	Aram	أخشى	خايف
13903	corpus-6-test-corpus-26-train	دعني أحول هذه المكالمة إلى المسئول .	خليني أحوّل هاي المكالمة للمسؤول.	خليني أحوّل هاي المكلمة للي بيسولف.	Aram	دعني	خليني					MSA
10563	corpus-6-test-corpus-26-dev	هل يمكن أن تحجزوا في العرض ؟	ممكن تحجزولي بالعرض؟	ممكن تحجزولي بالعرض؟	Aram							MSA
7947	corpus-6-test-corpus-26-train	أنا أقيم في فندق هيلتون .	أنا قاعد بفندق الهلتون.	أنا ساكن في فندق الهيلتون.	Aram	أقيم	قاعد
17606	corpus-6-test-corpus-26-train	أحب هذه الخدمة بتقديم شامبانيا للتحية بعد الإقلاع . دعني أشرب فى صحتك .	بحب هاي خدمة توزيع شامبانيا للترحيب بعد ما نطير. خليني أشرب بصحتك.	بحب هالخدمة يلي بتوزع شامبانيا للترحيب بعد ما نطير. خليني أشرب على صحتك.	Aram	تقديم	توزيع	تحية	ترحيب			MSA
7858	corpus-6-test-corpus-26-dev	ما هو الحد الأدنى للعمر لفعل ذلك ؟	إيش أقل عمر مسموح يعمل هيك؟	شو أقل عمر لعمل هيك؟	Aram	ما	إيش
12903	corpus-6-test-corpus-26-train	إلى فندقي ، من فضلك ، إن عنوان فندقي في هذه الورقة .	للفندق تبعي، لو سمحت، العنوان تبع الفندق ع هالورقة.	للفندق تبعي، لو سمحت، العنوان تبع الفندق ع هالورقة.	Aram							MSA
12557	corpus-6-test-corpus-26-train	أريد لقاء السيد ويليم .	بدي أشوف الأستاذ ويليم.	بدي أشوف الأستاذ ويليم.	Aram							MSA
14887	corpus-6-test-corpus-26-train	النبيذ ليس باردا بشكل كافي . هل نمكنك أن تجعله أكثر برودة ؟	الواين مش بارد كفاية. ممكن تبرده اكثر؟	العرق مش بارد كفاية. ممكن تبرده اكتر؟	Aram	ليس	مش			نبيذ :واين		MSA
19813	corpus-6-test-corpus-26-train	بكم هذا العطر ؟	بقديش هاظا العطر؟	كم سعر هالعطر؟	Aram							MSA
5207	corpus-6-test-corpus-26-test	بالتأكيد سوف ترسلهم ، أليس كذلك ؟	أكيد راح تبعتثم، صح؟	أكيد رح تبعتهم، مش هيك؟	Aram	ترسلهم	تبعثهم
173	corpus-6-test-corpus-26-test	أسف ، هذا المكان محجوز بالفعل .	آسف، هاذ المكان محجوز فعلاً.	معذرة، هاد المكان محجوز من قبل.	Aram	بالفعل	فعلاً
3572	corpus-6-test-corpus-26-train	من فضلك أعطني بعض النقود الفكة .	لو سمحت أعطيني شوية فراطة.	من فضلك اعطيني شوية فلوس صغار.	Aram	نقود فكة	فراطة	بعض	شوية
13183	corpus-6-test-corpus-26-train	لا أعرف شيئاً عن هذا الأمر .	ما بعرف إشي عن هالشغلة.	ما بعرف إشي عن هالشغلة.	Aram	أمر	شغلة	شيء	إشي			MSA
13504	corpus-6-test-corpus-26-train	حفلتك مقامة الآن . تفضل .	حفلتك مبلشة هسا. تفظل.	حفلتك عم تصير هسا. تفضل.	Aram	مقامة	مبلشة					MSA
16889	corpus-6-test-corpus-26-dev	أخطط للبقاء لمدة اثنا عشر يوماً .	بخطط أظل اثنعشر يوم.	بخطط أقعد اثنا عشر يوم.	Aram	أبقى	أظل					MSA
3351	corpus-6-test-corpus-26-test	يوجد الكثير من السائحين بالقرب من المبنى ، ويبدو أنهم تجمعوا لإلقاء نظرة على ما يحدث .	في كتير سواح حوالين البناية، شكلهم متجمعين عشان يشوفوا شو اللي بصير.	فيه زيادة من السياح بجنب المبنى، الشكل إنهم جمعوا يشوفوا شو صاير.	Aram	سائحين	سواح	يلقي نظرة	يشوف
4348	corpus-6-test-corpus-26-train	هل لك أن تقدر التكلفة قبل أن تبدأ العمل فيها ؟	ممكن تقدر قديش بكلف قبل ما تبدا شغل فيه؟	ممكن تقدرلي الثمن قبل ما تبلش تشتغل عليها؟	Aram	تبدأ	تبدا	عمل	شغل
4699	corpus-6-test-corpus-26-train	نعم . تم نقل أمتعة شخص آخر إلى غرفتي تواً . من فضلك ، هل من الممكن أن تقوم بفحصها ؟	اه، في شناتي لحدا ثاني وصلت غرفتي هسا.لو سمحت، ممكن تشوفها؟	أيوة. زادوا شنطة حدا تاني لعندي للغرفة هسا. لو سمحت، بتقدر تتأكد منها؟	Aram	تواً	هسا	تفحص	تشوف
2161	corpus-6-test-corpus-26-train	أريد أن أحصل على تعويض لذلك .	أنا بدي اوخد تعويض عن هاظ.	بدي أجيب تعويض عن هيك.	Aram	أحصل	اوخذ
9446	corpus-6-test-corpus-26-test	بالتأكيد , كن على راحتك .	أكيد، كون على طبيعتك	أكيد يا زلمة, كون مرتاح.	Aram	كن	كون
12750	corpus-6-test-corpus-26-dev	إن ثمة خطأ ما في بطاقة المفتاح هذه ، أعطني غيره ، من فضلك .	فيها غلطة شكلها بالكارت هاي، عطني وحدة ثانية، الله يخليك.	فيها غلطة شكلها بالكارت هاي، عطني وحدة ثانية، الله يخليك.	Aram							MSA
16141	corpus-6-test-corpus-26-train	من فضلك اتصل لي برقم ثلاثة اثنان ستة اثنان تسعة واحد ثمانية .	لو سمحت، رنلي على الرقم ثلاثة اثنين ستة اثنين تسعة واحد ثمانية.	لو سمحت، اتصل معي على الرقم تلاتة اتنين ستة اتنين تسعة واحد تمانية.	Aram	اتصل	رن					MSA
10500	corpus-6-test-corpus-26-train	أين مدخل مترو الأنفاق ؟	وين دخلة المترو؟	وين دخلة المترو؟	Aram							MSA
19560	corpus-6-test-corpus-26-train	معذرة . ولكني أريد تسليم تقرير السرقة .	معلش، بس بدي أسلم تقرير السرقة.	معليش، بس أنا بدي أسلم تقرير السرقة.	Aram	معذرة	معلش					MSA
787	corpus-6-test-corpus-26-train	هذا المقاس ، الذي تسميه المقاس العادي ، سوف تجده هنا .	هاذ الحجم ، اللي بتسميه حجم عادي، راح تلاقيه هون .	هاد الحجم، اللي بتسميه الحجم العادي، رح تلاقيه هون.	Aram	مقاس	حجم	تجد	تلاقي
10479	corpus-6-test-corpus-26-train	إنه رديء الصنع .	هو مش صنوع منيح.	هو مش صنوع منيح.	Aram							MSA
11126	corpus-6-test-corpus-26-train	هل يمكن أن تخبرني عن ساعات العمل ؟	ممكن تحكيلي عن ساعات الشغل؟	ممكن تحكيلي عن ساعات الشغل؟	Aram							MSA
11375	corpus-6-test-corpus-26-train	اعطني شهادة طبية , من فضلك .	عطيني وصفة طبية ، لو سمحت .	عطيني وصفة طبية ، لو سمحت .	Aram							MSA
19281	corpus-6-test-corpus-26-train	ليس معي فكة صغيرة .	ما معي فراطة.	ما عندي فكة صغيرة.	Aram							MSA
13484	corpus-6-test-corpus-26-train	هل يمكن أن أرى هذا ؟	ممكن أشوف هاظا؟	ممكن أشوف هاد؟	Aram	أرى	أشوف					MSA
7137	corpus-6-test-corpus-26-test	ليس لدى أي شئ لكي أعلنه .	ما عندي أي اشي عشان أعلنه.	ما عندي شي لحكيه.	Aram	لكي	عشان	ليس	ما
18487	corpus-6-test-corpus-26-train	أعتقد أنني تركت كاميرتي وغادرت عندما كنت أتناول العشاء هنا الليلة الماضية .	بظن اني تركت كميرتي و روحت لما كنت اكل هون امبارح عالعشا.	بظن اني بطيت كاميرتي ونطيت لما كنت اكل هون امبارح عالعشا.	Aram	عشاء	عشا	كاميرتي	كميرتي			MSA
10366	corpus-6-test-corpus-26-test	دعنا نجتمع لنبحث الأمر أكثر .	خلينا نلتقي عشان اناقش هاظ الموضوع أكثر.	يلا نتقابل نحكي في الموضوع أكتر.	Aram	نجتمع	نلتقي	الأمر	الموضوع
1508	corpus-6-test-corpus-26-test	هيه ، هذا فستان جميل حقا .	مرحبا ، هاذا فعلا فسطان حلو.	أيوة، هاي الفستان حلو كتير.	Aram	فستان	فسطان	حقا	فعلا
11435	corpus-6-test-corpus-26-train	من فضلك كن صديقي بالمراسلة .	من فضلك, كون صاحبي عالتواصل.	من فضلك, كون صاحبي عالتواصل.	Aram							MSA
17229	corpus-6-test-corpus-26-train	أعطني خمسين ، من فضلك .	اعطيني خمسين ، إذا سمحت.	اعطيني خمسين ، تكرم عينك.	Aram							MSA
19935	corpus-6-test-corpus-26-train	ما هذا المكان الذي نمر به الآن ؟	شو هالمكان اللي بنمر فيه هسا؟	شو هالمكان اللي عم نمر فيه هسا؟	Aram	الآن	هسا					MSA
8149	corpus-6-test-corpus-26-train	هل لي في استعارة بعض البياضات ؟	ممكن أستعير شرارشف؟	ممكن أستعير شوية أبيضات؟	Aram	بياضات	شراشف
5875	corpus-6-test-corpus-26-train	أوه , يبدو كأنه قرعة .	أوه، شكله قرعة .	اه، شكلها متل اليانصيب.	Aram
7264	corpus-6-test-corpus-26-train	اشعر كأن هناك تحديق في . هل من النادر رؤية شخص ياباني ؟	حاسك بتسرح فيه. لهاي الدرجة قليل تشوف واحد ياباني؟	بحس كأنه في ناس عم يحدقوا فيي. هل صعب تشوف شخص ياباني؟	Aram	أحدق	بسرح
12638	corpus-6-test-corpus-26-train	سنبعث لك بالبريد عشرين عينة إضافية .	رح نبعتلك عالبريد عشرين عينة زيادة.	رح نبعتلك عالبريد عشرين عينة زيادة.	Aram							MSA
13407	corpus-6-test-corpus-26-train	إن الرصيف رقم خمسة يقع هناك .	الرصيف رقم خمسة موجود هناك.	الرصيف رقم خمسة موجود هنيك.	Aram	يقع	موجود					MSA
16796	corpus-6-test-corpus-26-train	أين يوجد مكان لطيف لقضاء نزهة ليوم واحد ؟	وين بلاقي مكان لطيف أظل فيه رحلة ليوم واحد؟	وين بلاقي مكان زين اروح عليه لنزهة ليوم كامل؟	Aram	نزهة	رحلة					MSA
13069	corpus-6-test-corpus-26-train	يا سيد كاواي لدينا مائدة لك الآن . تفضل من هنا .	يا أستاذ كاواي، عنا طاولة الك حاليا. تعال من هون.	يا أستاذ كاواي، عنا طاولة الك حاليا. تعال من هون.	Aram	مائدة	طاولة	الآن	حاليا			MSA
4826	corpus-6-test-corpus-26-train	لا توجد مشكلة . إذا حضرت في الخامس من سبتمبر ، فسيكون بإمكانك الاستمتاع بعرض فيلم علمي لأن عندنا يوماً خاصاً مفتوحاً أول يوم جمعة من كل شهر .	ما في مشكلة. اذا اجيت بخمسة تسعة ، بتقدر تستمتع بالفلم العلمي لأنه احنا عنا يوم مميز مفتوح بأول جمعة من كل شهر.	ما في مشكلة. اذا اجيت عالخامس من سبتمبر، رح تقدر تشوف فيلم علمي بداخلنا لانه عندنا يوم مخصص فاتح يا بكل جمعة من الشهر.	Aram	حضرت	اجيت	سبتمبر	تسعة
5585	corpus-6-test-corpus-26-train	هل بإمكاني الحصول على طبق آخر مثل هذا ؟	بقدر آخذ صحن ثاني مثل هاذ؟	ممكن أخذ طبق ثاني زي هاد؟	Aram	طبق	صحن
11872	corpus-6-test-corpus-26-train	لا تهتم . على أي حال ، خذني من فضلك إلى مركز الحي الصيني . سأحاول أن أجده بنفسي .	ما تشيل هم. يلا، خذني لو سمحت لمركز الحي الصيني. راح احاول ادور الجهة وحدي.	ما تشيل هم. يلا، خذني لو سمحت لمركز الحي الصيني. راح احاول ادور الجهة وحدي.	Aram							MSA
11622	corpus-6-test-corpus-26-train	أهه ، هيا . دولارين فقط .	اها، يلا. بس دولارين.	اها، يلا. بس دولارين.	Aram							MSA
8233	corpus-6-test-corpus-26-train	سندويتشان برجر بالجبن ، من فضلك .	اثنين برجر بالجبنة، لو سمحت.	ساندويشتين برجر بالجبن، على راحتك.	Aram	جبن	جبنة
5098	corpus-6-test-corpus-26-dev	أرغب في كريم مسائي للبشرة .	بدي كريم ليلي للبشرة.	بدي كريم للبشرة لليلي.	Aram	مسائي	ليلي
6497	corpus-6-test-corpus-26-train	متى سنقلع ؟	أميت راح نقلع؟	إمتى رح نطلع؟	Aram
19329	corpus-6-test-corpus-26-train	هذا طيب ، على ما يبدو .	هاذ طيب ، من شكله.	هاي زينة، من شكلها.	Aram							MSA
17977	corpus-6-test-corpus-26-train	حسنا , الوقت متأخر إلى حد ما . أعتقد أنني يجب على أن أغادر الآن . شكرا جزيلا لك على الأمسية الرائعة .	ماشي, الوقت صار متأخر شوي. بظن انو لازم اروّح هسا. كتير شكرا على الليلة الممتعة.	ماشي, الوقت صار متأخر شوي. بظن انو لازم اروح هسا. كتير شكرا على المسا الفلة.	Aram	أمسية	ليلة	رائعة	ممتعة			MSA
15566	corpus-6-test-corpus-26-train	لقد سقطت من على درجات السلم .	وقعت من على درج السلم	طحت من على درج السلم.	Aram	سقطت	وقعت					MSA
11949	corpus-6-test-corpus-26-train	هذه السن في المقدمة تؤلمني .	هالسنة في الامام بتوجعني.	هالسنة في الامام بتوجعني.	Aram							MSA
8156	corpus-6-test-corpus-26-train	من أي نوع من الجلد الصناعي صُنعت حقيبة السفر هذه ؟	شو نوع الجلد الاصطناعي المصنوع منه شنطة السفر هاي؟	من أي نوع من الجلد الصناعي مصنوعة هاي الحقيبة بلسفر؟	Aram	حقيبة	شنطة
1122	corpus-6-test-corpus-26-train	أين نشأت سمكات الفراش هذه ؟	من وين جاية سمكات الفراش هاي؟	وين هاي السمكات الفرشاشة طلعت من؟	Aram	نشأت	جاية
7650	corpus-6-test-corpus-26-train	سأخطط لإرسال فواتير حاجياتي اليومية ، لذا من فضلك أخبرني العنوان و اسم الشخص المسئول من فضلك .	رح أبعث فواتير حاجاتي اليومية، عشان هيك لو سمحت أعطيني عنوان واسم الشخص المسؤول.	راح أنظم لإني أبعث فواتير الحاجات اليومية، فلذلك خليني أعرف العنوان واسم الشخص اللي بيكون المسؤول، لو سمحت.	Aram	حاجيات	حاجات
16952	corpus-6-test-corpus-26-train	أريد نسخة من تقرير السرقة .	بدي نسخة من تقرير السرقة.	بدي نسخة من تقرير السرقة.	Aram							MSA
11267	corpus-6-test-corpus-26-train	أريد السفر من شنغهاي إلى هاواي بالباخرة .	بدي أروح من شنغهاي لهاواي عالسفينة.	بدي أروح من شنغهاي لهاواي عالسفينة.	Aram							MSA
8527	corpus-6-test-corpus-26-train	جريدة باللغة الإنجليزية ، لطفاً .	جريدة بالانجليزي، لو سمحت.	جريدة بالإنجليزي، لو سمحت.	Aram	لطفاً	لو سمحت
1146	corpus-6-test-corpus-26-train	هل هناك سيارة ليموزين ؟	في سيارة ليموزين؟	في ليموزين عندكم؟	Aram
6699	corpus-6-test-corpus-26-train	لا أريد واحدة ضخمة .	ما بدي وحدة دفشة.	ما بدي وحدة كبيرة كتير.	Aram	ضخم	دفش
19217	corpus-6-test-corpus-26-train	أريد فندقاً آمنا يقدم إفطاراً جيدا ، من فضلك ؟	بدي فندق آمن ، بقدم فطور كويس ، لو سمحت ؟	بدي فندق آمن ، يعطي إفطار زين ، لو سمحت ؟	Aram	جيد	كويس					MSA
6513	corpus-6-test-corpus-26-train	أربعة وعشرين دولاراً . هل تريد المزيد ؟	أربعة وعشرين دولار. بدك كمان؟	أربعة وعشرين دولار. بدك زيادة؟	Aram	المزيد	كمان
3721	corpus-6-test-corpus-26-train	وقعت منى الشوكة . من فضلك أحضر واحدة أخرى .	وقعت مني الشوكة. لو سمحت جبلي وحدة ثانية.	سقطت الشوكة من إيدي. مع فضلك جيبلي وحدة ثانية.	Aram	أحضر	جيب
2704	corpus-6-test-corpus-26-train	لاحظ الفجوة ، لاحظ الفجوة ، ثم قرب الأبواب ، من فضلك .	لاحظ الفتحة، لاحظ الفتحة ، بعدين قرب الابواب، لو سمحت.	شوف الفراغ، شوف الفراغ، بعدين اغلق الأبواب، لو سمحت.	Aram	فجوة	فتحة	ثم	بعدين
6692	corpus-6-test-corpus-26-dev	من فضلك ساعدني أعثر على مرشد يتحدث اليابانية .	لو سمحت ساعدني ألاقي دليل سياحي بحكي ياباني.	الله يخليك ساعدني ألاقي مرشد بيتكلم ياباني.	Aram	أعثر	ألاقي	مرشد	دليل
9695	corpus-6-test-corpus-26-test	ماذا عن هذه النماذج البلاستيكة ؟	شو رأيك بموديلات البلاستك هاي؟	شو عن هاي النماذج البلاستيكية؟	Aram	نماذج	موديلات
8435	corpus-6-test-corpus-26-train	دعونا نحتفل ، هكذا قال وآخذني إلى بار . وقال إنه سيُجري مكالمة هاتفية وغادر ولم يعد أبداً وتحملت أنا وحدي عبء فاتورة ضخمة .	"خلينا تحتفل" هيك قال وأخذني على البار. حكى انه رايح يعمل مكالمة وراح وما رجع إجى أبداً وأنا تورطت بفاتورة كبيرة.	خلينا نحتفل ، هيك قال وخذني على البار. قال إنه رح يعمل مكالمة تلفونية وطلع وما رجع. وأنا صرت لحالي أدفع فاتورة كبيرة.	Aram	يجري	يعمل	تحملت	تورطت
8900	corpus-6-test-corpus-26-train	أرغب في خلع أسناني .	أنا حاب أقلع سناني.	بدي أشيل أسناني.	Aram	أسناني	سناني
391	corpus-6-test-corpus-26-train	أريد منبه ، من فضلك .	بدي منبه، لو سمحت.	بدي منبه ، لو سمحت .	Aram
14104	corpus-6-test-corpus-26-train	ما توقيت إجراءات مغادرة الفندق ؟	متى منقدر نعمل الاجراءات حتى نطلع من الفندق؟	شو وقت ما نقدر نطلع من الفندق؟	Aram	نغادر	نطلع					MSA
17149	corpus-6-test-corpus-26-train	أريد أن أحصل على استراحة .	بدي أوخذ بريك.	بدي أخذ بريك.	Aram	أحصل	أوخذ			استراحة : بريك		MSA
10257	corpus-6-test-corpus-26-train	هذه الغرفة اثنان صفر واحد . أريد أن أطلب إفطار الغد .	هاي الغرفة رقم اثنين صفر واحد. بدي أطلب فطور بكرا.	هاي الغرفة إثنين صفر واحد. بدي أطلب فطور بكرة.	Aram	إفطار	فطور
9022	corpus-6-test-corpus-26-train	هل هذا مصنوع من القطن ؟	هاذ مصنوع من القطن؟	هاد مصنوع من القطن؟	Aram
7983	corpus-6-test-corpus-26-train	ما هو مقدار الرسوم للوزن الزائد ؟	قديش الدفع على الوزن الزايد؟	شو قيمة الأجرة للوزن الزايد؟	Aram	ما مقدار	قديش	زائد	زايد
12678	corpus-6-test-corpus-26-dev	لدي معداتي الخاصة .	عندي أدواتي الخاصة.	عندي أدواتي الخاصة.	Aram							MSA
19959	corpus-6-test-corpus-26-train	في غرفة انتظار بالمحطة .	في غرفة انتظار بالمحطة.	في غرفة الانتظار بالمحطة.	Aram							MSA
27	corpus-6-test-corpus-26-train	كيف أستطيع مساعدتك ؟	كيف بقدر اساعدك ؟	شلون ممكن أساعدك؟	Aram	أستطيع	بقدر
10435	corpus-6-test-corpus-26-train	ادخل . من فضلك ضعها على المائدة هناك .	أدخل. لو سمحت حطها على الطاولة هنيك.	أدخل. لو سمحت حطها على الطاولة هنيك.	Aram							MSA
17313	corpus-6-test-corpus-26-train	حسناً . سأتأكد أن حقائبك ستكون هنا .	طيب . راح أتأكد إنه الشناتي رح تكون هون.	طيب . راح أتأكد إنه الشنط حكونوا هون.	Aram	حقائب	شناتي					MSA
2678	corpus-6-test-corpus-26-train	سنأتي في السابعة .	رح نيجي الساعة سبعة.	رح نيجي الساعة سبعة.	Aram	نأتي	نيجي	سابعة	سبعة
15814	corpus-6-test-corpus-26-train	حقاً . اليوم هو الأحد ، والأحد هو أسوء الأيام .	فعلاً. اليوم الأحد، والأحد أسوأ الأيام.	عالفعل. اليوم الأحد، والأحد أسوأ الأيام.	Aram	حقاً	فعلاً					MSA
18519	corpus-6-test-corpus-26-train	إما أن تصلحها أو تستبدلها ، من فضلك .	يا تصلحها يا تبدلها، لو سمحت.	إما تصلحها أو تغيرها، لو سمحت.	Aram	إما	يا	تستبدلها	تبدلها			MSA
4450	corpus-6-test-corpus-26-train	ربما أعطيك إجابة أفضل من تلك بعد عرضين .	يمكن أعطيك جواب أحسن من هاذ بعد ما أشوفه مرتين.	يمكن اعطيك جواب احسن من هاي بعد مرتين.	Aram	إجابة	جواب	ربما	يمكن
10433	corpus-6-test-corpus-26-train	إن ارتفاعه ألفان وأربعمائة متر .	إنو ارتفاعه ألفين وأربعمية متر.	إنو ارتفاعه ألفين وأربعمية متر.	Aram							MSA
11199	corpus-6-test-corpus-26-train	هل يمكن أن أستعيد متعلقات ؟	ممكن أرجع متعلقاتي؟	ممكن أرجع متعلقاتي؟	Aram							MSA
8584	corpus-6-test-corpus-26-train	هل بإمكاني إجراء طلبية ؟	بقدر اطلب؟	ممكن أعمل طلب؟	Aram
18018	corpus-6-test-corpus-26-train	إنه خطئي . ليس خطأك .	هاي غلطتي. مش غلطتك.	هاي غلطتي. مش غلطتك.	Aram	خطأ	غلطة					MSA
3038	corpus-6-test-corpus-26-dev	لا يوجد أي منها .	ما في منهم.	ما في ولا وحدة منهم.	Aram	لا	ما
14069	corpus-6-test-corpus-26-train	أريد غرفة بمنظر جميل .	بدي غرفة مع إطلالة حلوة.	بدي غرفة مع منظر حلو.	Aram	منظر	إطلالة					MSA
15676	corpus-6-test-corpus-26-train	أنا ياباني .	أني ياباني.	أنا ياباني.	Aram							MSA
3152	corpus-6-test-corpus-26-train	هل لديكم دبابيس زينة ذات تصميمات رائعة ؟	عندك بروشات شكلها حلو؟	عندكم دبابيس زينة فيها رسومات حلوة؟	Aram	رائع	حلو	تصميم	شكل	دبوس زينة:بروش
1465	corpus-6-test-corpus-26-test	يبدوا أنني غير قادر على الحصول على الماء الساخن .	شكله مش قادر يجيب ميّة ساخنة.	بيبان انو مش قادر احصل على مي السخن.	Aram	ماء	ميّة	يبدو	شكله
11932	corpus-6-test-corpus-26-test	هلا وقفت معي لالتقاط صورة ؟	بتقدر توقف معي شوي عشان نصور صورة؟	بتقدر توقف معي شوي عشان نصور صورة؟	Aram							MSA
12644	corpus-6-test-corpus-26-train	لا أعتقد أن ذلك يناسبني فجلدي جاف إلى حد ما .	ما بعتقد انه هاد بلبقلي، جلدي ناشف كثير.	ما بعتقد انه هاد بلبقلي، جلدي ناشف كثير.	Aram							MSA
5761	corpus-6-test-corpus-26-train	أكون ممتنا جدا لو أخذتني إلى الشاطئ .	راح أكون كثير ممنون لو توخذني لعند الشط.	بكون مشكور كتير لو راح توخذني عالشاطيء.	Aram	ممتن	ممنون	أخذتني	توخذني
416	corpus-6-test-corpus-26-train	هل يمكنني الحصول على تذكرتين درجة ثانية لشيكاغوا , من فضلك ؟	ممكن أحجز تذكرتين لشيكاغو من الدرجة الثانية، لو سمحت؟	ممكن أخذ تذكرتين درجة تانية لـ شيكاغو ، لو سمحت؟	Aram	هل يمكنني	ممكن
15652	corpus-6-test-corpus-26-train	أجل ، أنا . لقد كانوا يعيشون بجواري في كاليفورنيا لكنهم انتقلوا إلى فلوريدا منذ عامين . ماذا عنك ؟ هل تسافر بمفردك ؟	أيوه، أنا. كانوا عايشين بحدي بكاليفورنيا بس انتقلوا على فلوريدا من سنتين. شو بالنسبة الك؟ بتسافر لحالك؟	أيوه، أنا. كانوا عايشين جنبي بكاليفورنيا بس انتقلوا على فلوريدا من زمان سنتين. شو بالنسبة الك؟ بتسافر لحالك؟	Aram	بجواري	بحدي	لكن	بس			MSA
7478	corpus-6-test-corpus-26-train	أنا من طوكيو .	أني من طوكيو.	أنا من طوكيو.	Aram	أنا	أني
8543	corpus-6-test-corpus-26-train	أي منتجات صوفية أخرى ؟	في منتجات صوف ثانية؟	شو منتجات صوفية ثانية؟	Aram
14150	corpus-6-test-corpus-26-train	هل من الممكن أن تخبرنا كيف تقيم هذه الخطة ؟	ممكن تحكيلنا كيف بتعمل هاي الخطة ؟	ممكن تحكيلنا كيف بتقيم هالخطة ؟	Aram	تخبرنا	تحكيلنا	تقيم	تعمل			MSA
11574	corpus-6-test-corpus-26-train	مساء الخير . أهلا .	مسا الخير. أهلين.	مسا الخير. أهلين.	Aram							MSA
12057	corpus-6-test-corpus-26-dev	اخرج من ذلك الباب ، وانتظر عند المحطة رقم ستة .	طلع من هاي الباب، و انطر عند المحطة رقم ستة.	طلع من هاي الباب، و انطر عند المحطة رقم ستة.	Aram							MSA
4671	corpus-6-test-corpus-26-train	سبعاً ، من فضلك .	سبعة، لو سمحت.	سبعة ، لو سمحت .	Aram	سبعاً	سبعة
10091	corpus-6-test-corpus-26-train	مهزوز ، وليس مضروب .	محرك، مش مخفوق.	مهزوز، مش مضروب.	Aram	مضروب	مخفوق
6659	corpus-6-test-corpus-26-train	ثلاثة أيام .	ثلاث أيام.	تلاتة ايام.	Aram
4013	corpus-6-test-corpus-26-train	تريد أن تشتري ثوبا .	هي بدها تشتري فسطان.	بدك تشتري ثوب.	Aram	ثوب	فسطان
5091	corpus-6-test-corpus-26-train	لا ، ليس بعد ، هناك الكثير نختار فيه .	لا، بعده ، في كثير عشان تنقي منه	لا، مش لهسة، في كتير شغلات بدنا نختار منها.	Aram	تختار	تنقي
3195	corpus-6-test-corpus-26-train	سر في خط مستقيم على طول النهر حوالي نصف ميل . ستصل للمتنزه .	إمشي دغري على طول النهر حوالي نص ميل. بتصل المنتزه.	اطش في خط صواعد على جنب النهر حوالي نص ميل. رح توصل للبستان.	Aram	متنزه	منتزه	نصف	نص
158	corpus-6-test-corpus-26-train	أسف أنني بحاجة إلى أن أطلع على أي مستند لتحديد الهوية .	أسف أني بحاجة إني أشوف اثبات هوية.	معذرة بدي أشوف أي ورقة تحدد الهوية.	Aram	أطلع	أشوف	مستند	إثبات
6991	corpus-6-test-corpus-26-train	كن حذراً ، السقف منخفض .	انتبه ، السقف واطي.	كون حذر، السقف زغير.	Aram	كن حذراً	انتبه	منخفض	واطي
319	corpus-6-test-corpus-26-train	كم تتقاضى لتطبيع صور الفيلم ؟	قديش بتوخذ عشان تطبع صور الفلم؟	أديش بتجر لتطبيع صور الفيلم؟	Aram	فيلم	فلم	تتقاضى	بتوخذ
9329	corpus-6-test-corpus-26-train	هل يدخل هذا في حدود المعفي من الضرائب ؟	هاظ معفي من الضرايب؟	هاد بيدخل بالحدود اللي بتعفى من الضرايب؟	Aram	ضرائب	ضرايب
17861	corpus-6-test-corpus-26-train	غرفة مفردة بدون دش من فضلك .	غرفة مفردة بدون دش لو سمحت .	كرسي فردي من دون دش يا هلا.	Aram							MSA
8497	corpus-6-test-corpus-26-dev	هل يمكن أن تدلّني أين أجد القنصلية اليابانية ؟	ممكن تحكيلي وين بقدر ألاقي القنصلية اليابانية؟	بتقدر تدلني وين بلاقي القنصلية اليابانية؟	Aram	أجد	ألاقي
18690	corpus-6-test-corpus-26-train	من فضلك ضعها في قمع .	لو سمحت حطها ببوري.	لطفاً حطها بالمصفاة.	Aram	ضعها	حطها	قمع	بوري			MSA
4119	corpus-6-test-corpus-26-train	نصف أوقية من شانيل رقم خمسة من فضلك .	نص أوقية من شانيل رقم خمسة، لو سمحت.	نص اوقية من شانيل رقم خمسة لو سمحت.	Aram	نصف	نص
9576	corpus-6-test-corpus-26-train	شخصان .	شخصين.	تنين اشخاص.	Aram
5334	corpus-6-test-corpus-26-train	هل تعرف ما إذا كان هناك أي فنادق رخيصة الأسعار ؟	بتعرف اذا في أي فنادق رخيصة؟	بتعرف اذا في فنادق رخيصة هون؟	Aram
7831	corpus-6-test-corpus-26-train	أريد أن أقدم طلباً للحصول على إصدار جديد .	بدي أقدم طلب مشان اخد إصدار جديد.	بدي اعمل طلب عشان اقدر اجيب اصدار جديد.	Aram
19170	corpus-6-test-corpus-26-train	أريد بزة .	بدي سترة.	بدي لبس.	Aram	بزة	سترة					MSA
11057	corpus-6-test-corpus-26-train	هذا مكلف نوعا ما .	هاي بتكلف شوي.	هاي بتكلف شوي.	Aram							MSA
12527	corpus-6-test-corpus-26-train	لقد طلبت لحما لا سمكا . هل يمكنك تغيير هذا ؟	طلبت لحم مش سمك. ممكن تغير هاي؟	طلبت لحم مش سمك. ممكن تغير هاي؟	Aram							MSA
2492	corpus-6-test-corpus-26-train	عذراً . هل يوجد محل كتب قريب من هنا ؟	عفواً . في مكتبة بتبيع كتب قريب من هون ؟	معذرة. في محل كتب قريب من هون؟	Aram	عذراً	عفواً	محل كتب	مكتبة
14475	corpus-6-test-corpus-26-train	حينئذ سنأخذها .	بهالوقت رح نوخذها.	بهالوقت رح ناخدها.	Aram	حينئذ	بهالوقت					MSA
11704	corpus-6-test-corpus-26-train	إنه بعيد جداً . يحسن بك أن تأخذ سيارة أجرة .	هو بعيد كتير. فضل أكيد تاخذ تكسي.	هو بعيد كتير. فضل أكيد تاخذ تكسي.	Aram							MSA
8108	corpus-6-test-corpus-26-train	في أي وقت نبدأ ؟	على أي ساعة راح نبلش؟	إمتى بدنا نبلش؟	Aram	نبدأ	نبلش
17537	corpus-6-test-corpus-26-train	حسناً . لقد تم التأكيد . هل يمكننا أن نأخذ رقم تليفونك في حالة الحاجة إلى الاتصال بك ؟	ماشي، اتأكدت . بنقدر نوخذ رقمك تلفونك في حال احتجنا نتصل فيك؟	ماشي، انكدت الأمور. بإمكانا نأخذ رقمك التلفوني لو صار لزوم نتصل فيك؟	Aram	يمكننا	بنقدر	بك	فيك			MSA
4836	corpus-6-test-corpus-26-train	حسنا . خصم خمسة في المائة . هل يوافقك لك ؟	ماشي ، خصم خمسة بالمية. بمشي معك؟	زين، خصم خمسة بالمية. بتوافق عليه؟	Aram	يوافقك	بمشي	حسنا	ماشي
1519	corpus-6-test-corpus-26-train	الآن ، مكالمتك ردت . تفضل من فضلك .	حاليا، مكالمتك رجعت. تفضل لو سمحت.	هسا، الرد على مكالمتك جا. تفضل اذا بتريد.	Aram	ردت	رجعت	الآن	حاليا
9983	corpus-6-test-corpus-26-train	أوه ، أهي كذلك ؟ كيف تفضلها ؟	أووه، هي هيك؟ كيف بتحبها؟	أها ، هيك هي؟ كيف بتحبها ؟	Aram	تفضلها	بتحبها	كذلك	هيك
8791	corpus-6-test-corpus-26-test	أنا فقدت أثر بريد مسجّل .	ضيعت أثر رسالة مسجلة.	أنا ضيعت طرد مسجل.	Aram	فقدت	ضعيت
13492	corpus-6-test-corpus-26-train	لا أشعر بحالة جيدة . هل ترشدني إلى طبيب ؟	ما بحس حالي ملبح. ممكن ادلني على دكتور؟	ما بحس حالي منيح. ممكن تدلني على دكتور؟	Aram	أشعر	بحس	ترشدني	ادلني			MSA
6430	corpus-6-test-corpus-26-dev	هل أنت ملم بجغرافيا اليابان ؟	إنت ملم بتظاريس اليابان؟	بتعرف شغلات عن جغرافية اليابان؟	Aram	جغرافيا	تظاريس
6999	corpus-6-test-corpus-26-train	لا أستطيع رؤية الشاشة جيداً من هنا ، هل يمكنني تبديل المقاعد لبعض الوقت ؟	أنا مش قادر أشوف الشاشة مليح من هون. ممكن نبدل المقاعد شوي؟	ما بقدر اشوف الشاشة كويس من هون، فيني اغير المكان لشوي؟	Aram	أستطيع	بقدر
15735	corpus-6-test-corpus-26-dev	سعر الغرفة هو ستة آلاف ين في الليلة .	سعر الغرفة ست آلاف ين لليلة.	سعر الغرفة ستة ألف ين لليلة.	Aram							MSA
5695	corpus-6-test-corpus-26-train	أعتقد أن سيارتي تستحق حوالي خمسة آلاف دولارا .	أنا بتوقع سيارتي بتسوى حوالي خمس الآف دولار.	بفكر انو سيارتي بتستاهل حول الخمسة آلاف دولار.	Aram	تستحق	بتسوى
19226	corpus-6-test-corpus-26-train	أين حديقة الحيوان ؟	وين حديقة الحيوانات؟	وين حديقة الحيوانات؟	Aram							MSA
145	corpus-6-test-corpus-26-train	هي تريد بيرة .	هي بدها بيرا .	هي بدها بيرة.	Aram	بيرة	بيرا
1212	corpus-6-test-corpus-26-train	هل هذه الحقيبة مناسبة لكل حالات الطقس ؟	هاي الشنتة بتناسب كل حالات الجو؟	هاي الشنطة مناسبة لكل أحوال الجو؟	Aram	الطقس	الجو
13856	corpus-6-test-corpus-26-test	أفضل شيء هو اسطوانة مصغرة .	أحسن اشي هو سي دي صغير.	أحسن اشي هو سي دي صغير.	Aram	مصغر	صغير	أفضل	أحسن	إسطوانة مدمجة: سي دي		MSA
13188	corpus-6-test-corpus-26-train	فهمت ، في هذه الحالة ليس علىّ أن أدفع أجر التبديلات ، أليس كذلك ؟	فهمت، بهاي الحالة ما عليي أدفع فلوس التبديلات، مش هيك؟	فهمت، في هيك الحالة ما عليي أدفع فلوس التبديلات، مش هيك؟	Aram	أليس	مش	ليس	ما			MSA
19694	corpus-6-test-corpus-26-train	هل يمكنك أن تريني حجماً أكبر بقليل ؟	ممكن توريني سايز اكبر شوي؟	ممكن توريني حجم اكبر شوي؟	Aram	قليل	شوي			حجم : سايز		MSA
9628	corpus-6-test-corpus-26-dev	هل يمكنك بطريقة ما أن تصف لي مرضك بالإنجليزية ؟	بتقدر بأي طريقة تشرحلي مرضك بالإنجليزي؟	ممكن تشرحلي بالانجليزي شو مرضك؟	Aram	تصف	تشرح
10134	corpus-6-test-corpus-26-test	انتقلنا إلى هذا المنزل منذ عام .	رحلنا لهاظ البيت من سنة.	تحولنا لهالبيت من عام.	Aram	انتقلنا	رحلنا
19656	corpus-6-test-corpus-26-train	معذرة ، هل يسعني أن أتوجه إليك بسؤال ؟	معلش، بقدر أوجهلك سؤال؟	معلش، بيجيني أسألك سؤال؟	Aram	أتوجه	أوجه	يسعني	بقدر			MSA
1931	corpus-6-test-corpus-26-dev	هذا سعر مرتفع ، أليس كذلك ؟	هاظا سعره غالي، صح؟	هاي السعر عالي، مش هيك؟	Aram	أليس كذلك	صح	مرتفع	غالي
11821	corpus-6-test-corpus-26-train	نعم ، ولكن تأكد أن تذكرتك معك .	ايوه، بس تأكد إنه تذكرتك معك.	ايوه، بس تأكد إنه تذكرتك معك.	Aram							MSA
10272	corpus-6-test-corpus-26-test	ما رأيك في موضوع التحرش الجنسي في مكان العمل ؟	شو رأيك بالتحرشات الجنسية اللي بتصير بمكان الشغل؟	شو رأيك بموضوع التحرش الجنسي بمحل الشغل؟	Aram	عمل	شغل
19617	corpus-6-test-corpus-26-test	أريد تذكرتين ذهاب وعودة إلى أكسفورد .	بدي تذكرتين روحة رجعة على أكسفورد.	بدي تذكرتين رايح جاي على أكسفورد.	Aram							MSA
16751	corpus-6-test-corpus-26-test	هل ستذهب إلى المدرسة هنا ؟	رح تروح عالمدرسة هون؟	رح تروح على المدرسة هون؟	Aram	تذهب	تروح					MSA
6193	corpus-6-test-corpus-26-train	أود بعضاً من فيلم رقم ايه إس ايه لهذه الكاميرا ، من فضلك .	بدي فيلم رقم ايه إس ايه لهاي الكميرا، لو سمحت.	بدي شوية من فيلم رقم ASA لهالكاميرا ، اذا بتسمح.	Aram	كاميرا	كميرا
1791	corpus-6-test-corpus-26-train	أصبت بسحجة .	أني انشخطت.	صرت مصاب بجروح صغيرة.	Aram	سحجة	شخط
3016	corpus-6-test-corpus-26-train	أريد تسجيل أمتعتي .	بدي أسجل شنطي.	بدي أسجل حقايبي.	Aram	أمتعتي	شنطي
4924	corpus-6-test-corpus-26-train	أريد أن أرى ذاك الذي في نافذة العرض ، من فضلك .	بدي أشوف هاذ الموجود بالواجهة، لو سمحت.	بدي اشوف هاد اللي بزجاجة العرض، لو سمحت.	Aram	ذاك	هاذ
17280	corpus-6-test-corpus-26-train	ما هي المحتويات ؟	شو المكونات؟	شو المحتويات؟	Aram	محتويات	مكونات					MSA
17158	corpus-6-test-corpus-26-train	لقد تعطلت سيارتي . من فضلك احضر لتأخذها .	سيارتي خربت. تعال خذها لو سمحت.	سيارتي قاعدة على طولها. تعال خذها لو سمحت.	Aram	تعطلت	خربت	احضر	تعال			MSA
19038	corpus-6-test-corpus-26-train	ما النمط الذي في مخيلتك ؟	شو النمط اللي بخيالك؟	شو النمط اللي بخيالك؟	Aram	مخيلة	خيال					MSA
19871	corpus-6-test-corpus-26-train	كيف تسير الأمور ؟	كيف ماشية الأمور؟	شو الوضع؟	Aram	تسير	ماشية					MSA
5124	corpus-6-test-corpus-26-train	ألا تسأله أن يتصل بي ؟	بتقدر تحكيله يتصل فيّ؟	ما بتسأله يحكي معي؟	Aram	بي	فيّ
19814	corpus-6-test-corpus-26-train	ما الغرض منها ؟	شو الهدف منها؟	شو الهدف منها؟	Aram	غرض	هدف					MSA
11123	corpus-6-test-corpus-26-train	كيف يربي الآباء اليابانيون أولادهم ؟ هل هم صارمون مع أطفالهم ؟	كيف بيربو الآباء اليابانيين ولادهم؟ همة شديدين مع عيالهم؟	كيف بيربو الآباء اليابانيين ولادهم؟ همة شديدين مع عيالهم؟	Aram							MSA
4733	corpus-6-test-corpus-26-train	هلا ضغطت على زر مصراع النافذة ؟	ممكن تكبس كبسة الشباك؟	أهلا، دست على زر شتر النافذة؟	Aram	تضغط	تكبس	زر	كبسة
1556	corpus-6-test-corpus-26-train	أيمكنني أن أذهب هناك بمترو الأنفاق ؟	بقدر أروح هناك بالمترو؟	ممكن اروح هناك بالمترو؟	Aram
12861	corpus-6-test-corpus-26-dev	دعنا نشاهد التلفزيون . فيها مباراة بيسبول .	خلينا نتفرج على التلفزيون. في مباراة بيسبول.	خلينا نتفرج على التلفزيون. في مباراة بيسبول.	Aram							MSA
12443	corpus-6-test-corpus-26-train	حسناً . خذ هذا الاتجاه . من فضلك ، سأوصلك إلى غرفتك .	ماشي، خذ هاي الطريقة. لو سمحت، رح أوصلك لغرفتك.	ماشي، خذ هاي الطريقة. لو سمحت، رح أوصلك لغرفتك.	Aram							MSA
143	corpus-6-test-corpus-26-train	أريد تمويج متقارب لشعري ، من فضلك .	بدي أعمل شعري كيرلي ، لو سمحت.	بدي اعمل موجات قريبة لشعري، لو سمحت.	Aram	من فضلك	لو سمحت			شعر مموج :كيرلي
15477	corpus-6-test-corpus-26-train	نريد مائدة في الشرفة .	بدنا طاولة على البرندة.	بدنا طاولة على البرندة.	Aram							MSA
11161	corpus-6-test-corpus-26-train	معدتي ثقيلة .	معدتي كبيرة.	معدتي كبيرة.	Aram							MSA
19716	corpus-6-test-corpus-26-dev	أعد ذلك , من فضلك .	عيدها، لو سمحت.	أعيدها، لو سمحت.	Aram	أعد	عيد					MSA
5436	corpus-6-test-corpus-26-train	سآخذ صورة لجاك دانيلز .	راح آخذ صورة لجاك دانيلز.	راح أصور جاك دانيلز.	Aram
15522	corpus-6-test-corpus-26-train	هل لديكم أطباق ذات سعرات حرارية منخفضة ؟ فأنا أتبع نظاما غذائياً حالياً .	عندكو وجبات قليلة الكالوريز ؟ أنا ماشية بدايت هالأيام.	عندكم أطباق قليلة السعرات الحرارية ؟ أنا عم بتبع نظام غذائي هالأيام.	Aram	أطباق	وجبات	منخفضة	قليلة		نظام غذائي : دايت	MSA
6715	corpus-6-test-corpus-26-train	ما هي الفوارق بين هذه الفنادق ؟	شو الفرق بين هاي الفنادق؟	شو الفروقات بين هالفنادق؟	Aram	فوارق	فرق
16413	corpus-6-test-corpus-26-train	لم أقم بالحجز .	ما عملت حجز.	ما عملت حجز.	Aram	أقم	عملت					MSA
10599	corpus-6-test-corpus-26-train	هل لديك أية فكة لعداد الانتظار ؟	عندك عملة للبارك ميتر؟	عندك عملة للبارك ميتر؟	Aram							MSA
16773	corpus-6-test-corpus-26-train	أيهما تفضل , داكن أم فاتح ؟	شو بتحب أكثر, غامق أو فاتح؟	شو بتحب أكثر, غامق أو فاتح؟	Aram	تفضل	بتحب	غامق	داكن			MSA
15240	corpus-6-test-corpus-26-train	حسناً سيدي . وما الحلو الذي تريد أن تختم به الطعام ؟	طيب يا استاذي.. شو الحلو اللي بدك تختم فيه الأكل ؟	طيب يا استاذي.. شو الحلا اللي بدك تكمل فيه الأكل ؟	Aram	الطعام	الأكل	سيدي	استاذي			MSA
9969	corpus-6-test-corpus-26-train	إنني أسجل لخروجي من الفندق . هلا أرسلت خادماً إلى أعلى ؟	أني بعمل تشيك اوت. ممكن تودي عامل لفوق؟	أنا عم بسجل عشان أطلع من الفندق. ممكن تبعتولي خادم فوق؟	Aram	خادم	عامل	أعلى	فوق	تسجيل خروج : تشيك اوت
19002	corpus-6-test-corpus-26-train	كيف يمكنني الذهاب إلى ديزني لاند ؟	شلون بقدر أروح على ديزني لاند؟	شلون بقدر أروح على ديزني لاند؟	Aram							MSA
2816	corpus-6-test-corpus-26-train	الآن ، هذه اللوحة خاصة جداً . رسمها تسوروتارو كاتاأوكا . إنه معروف بأنه فنان عالمي .	هسا، هاي اللوحة كثير مميزة. رسمها تسوروتارو كاتاأوكا. معروف هاذ فنان عالمي.	هسا، هاي اللوحة خاصة كتير. رسمها تسوروتارو كاتاأوكا. معروف انو هو فنان عالمي.	Aram	خاصة	مميزة
8194	corpus-6-test-corpus-26-train	هذه المظلة يمكن استخدامها كعصا للسير .	هاي الشمسية بقدر استخدمها كعصاية.	هاي الشمسية ممكن تستعملها كما عصا للمشي.	Aram	عصا	عصاية	مظلة	شمسية
16434	corpus-6-test-corpus-26-train	لأن الصيف في اليابان عادة ما يكون شديد الحرارة ، ولم يكن لدينا تكييف هواء قديماً .	لأنه الصيف باليابان عادة بكون حامي كثير، وما كان عندنا مكيف هوا زمان.	لأنه الصيف باليابان عادة بكون حار كتير، وما كان عندنا مكيف هواء زمان.	Aram	هواء	هوا	حار	حامي			MSA
2306	corpus-6-test-corpus-26-train	الشيء نفسه لي ، من فضلك .	ونفس الشي إلي ، لو سمحت.	الشي الهو نفسو الي، لو سمحت.	Aram	لي	إلي
187	corpus-6-test-corpus-26-train	يوم الصحة الرياضية هو يوم العاشر من أكتوبر وهو إجازة قومية الغرض منها تحسين صحة المواطنين .	يوم الصحة الرياضية بعشرة عشرة بكون عطلة وطنية عملوه عشان يرفعوا مستوى الصحة عند الناس.	يوم الصحة الرياضية هو اليوم العاشر من تشرين الاول وهو عطلة رسمية الهدف منها تحسين صحة الهلّاب.	Aram	إجازة	عطلة	قومية	وطنية
17811	corpus-6-test-corpus-26-train	هل من الممكن أن تنظف المنضدة من فضلك ؟	ممكن تنظف الطاولة، لو سمحت؟	ممكن تنظف الطاولة، لو سمحت؟	Aram	المنضدة	الطاولة					MSA
4375	corpus-6-test-corpus-26-train	يوجد عصير أناناس وبرتقال وطماطم .	في عصير أناناس و برتقال و بندورة.	عنا عصير أناناس و برتقال و طماطم.	Aram	طماطم	بندورة
19548	corpus-6-test-corpus-26-train	أود الإقامة بهذه الغرفة ليلة واحدة أخرى .	بدي أظل بهاي الغرفة ليلة ثانية.	بدي أضل بهاي الغرفة ليلة تانية.	Aram							MSA
14235	corpus-6-test-corpus-26-train	ثمانية دولارات . وهنا تأتي واحدة حالا .	ثمن دولرات. وهون بتيجي وحدة هسا.	تمانة دولارات. وهون بتيجي وحدة هسا.	Aram	واحدة	وحدة	تأتي	تيجي			MSA
2338	corpus-6-test-corpus-26-train	هذا حسن بالنسبة لي . في الواقع أحب أن أدخن .	هاذ تمام بالنسبة إلي . بصراحة أني بحب أدخن.	هاظا حسن عندي. في الحقيقة بحب أدخن.	Aram	حسن	تمام
326	corpus-6-test-corpus-26-train	المكان كان على كرسي في البهو .	المكان كان عكرسي باللوبي.	المكان كان على كرسي بالصالة.	Aram					البهو: لوبي
7721	corpus-6-test-corpus-26-train	أشعر بصداع خفيف .	حاس بصداع خفيف.	بحس بصداع خفيف.	Aram	أشعر	حاس
10950	corpus-6-test-corpus-26-train	ألو ، اسمي أودا . عندي حجز الليلة ، لكن سوف أتأخر في القدوم . لهذا من فضلك اتركوا لي الحجز .	مرحبا، اسمي أودا. عندي حجز هالليلة، بس راح يتأخر وصولي. يرجـى خليكو الحجز لي.	مرحبا، اسمي أودا. عندي حجز هالليلة، بس راح يتأخر وصولي. يرجـى خليكو الحجز لي.	Aram							MSA
14317	corpus-6-test-corpus-26-train	أين قسم السفر ؟	وين قسم السفر؟	وين قسم السفر؟	Aram	أين	وين					MSA
4662	corpus-6-test-corpus-26-train	هل لديك أي صورة لبطاقة هوية ؟	عندك اي صورة للهوية؟	عندك صورة للهوية؟	Aram
16960	corpus-6-test-corpus-26-train	هل لك أن تعطيني إشارة بالضوء عندما تكون فيها ؟	بتقدر تعطيني إشارة بالضو لما تكون فيها؟	بتقدر تعطيني أشارة بالضوء لما تكون فيها؟	Aram	ضوء	ضو	عندما	لما			MSA
19691	corpus-6-test-corpus-26-train	أريد فحص هذه الحقائب المتجه إلى طوكيو , من فضلك .	بدي اتفقد هالشناتي اللي رايحة لطوكيو، لو سمحت.	بدي اتفقد هالحقايب اللي متجهة لطوكيو، لو سمحت.	Aram	افحص	اتفقد					MSA
7048	corpus-6-test-corpus-26-train	ثمة شئ خطأ في آلة التهوية هذه .	في اشي غلط بالمروحة هاذ.	في اشي غلط بالجهاز الهوائي هاد.	Aram	ثمة	في	آلة تهوية	مروحة
18614	corpus-6-test-corpus-26-train	منذ هذا الصباح .	من الصبح.	من الصبح.	Aram	منذ	من					MSA
6539	corpus-6-test-corpus-26-train	من فضلك قس حجم حذائي .	لو سمحت قيس حجم كندرتي.	لو سمحت، قيِّس مقاس البوت عندي.	Aram	قس	قيس	حذاء	كندرة
17179	corpus-6-test-corpus-26-dev	أوافق . إنه أحد الأماكن المفضلة لي .	موافق. هاذ واحد من احلا الاماكن عندي.	موافق. هاد واحد من احلا الاماكن عندي.	Aram	مفضلة	أحسن	أوافق	موافق			MSA
12677	corpus-6-test-corpus-26-train	لابد أن تكون هادئة .	لازم تكوني هادية.	لازم تكوني هادية.	Aram							MSA
11991	corpus-6-test-corpus-26-train	أريد مطفأة سجائر .	بدي منطفة سجاير.	بدي منطفة سجاير.	Aram							MSA
14462	corpus-6-test-corpus-26-dev	أود أن أتتناول طبقا مثل هذا .	بدي أوكل صحن زي هاظ.	بدي أكل صحن زي هيك.	Aram	طبق	صحن					MSA
15436	corpus-6-test-corpus-26-train	أين توجد أقرب مغسلة ؟	وين اقرب مغسلة؟	وين اقرب غسالة؟	Aram							MSA
16747	corpus-6-test-corpus-26-train	هل لي بجدول مواعيد ؟	أعطيني جدول المواعيد؟	بعرف أخد جدول المواعيد؟	Aram							MSA
13438	corpus-6-test-corpus-26-train	من فضلك اعطني هذه .	لو سمحت اعطيني هاي.	من فضلك اعطيني هاي.	Aram	هذه	هاي					MSA
18419	corpus-6-test-corpus-26-train	هل يمكن أن أذهب لمشاهدة المعالم أثناء رسو السفينة في الميناء ؟	بقدر أروح اشوف المناظر لما السفينة تكون راسية بالمينا؟	بقدر أروح اشوف المعالم لما السفينة تكون راسية بالميناء؟	Aram	ميناء	مينا	أشاهد	أشوف			MSA
8227	corpus-6-test-corpus-26-train	هل يوجد مكان يقبل تنظيف الملابس في أيام الآحاد ؟	في أي مكان بقبل طلبات الغسيل كل يوم أحد؟	في محل يسوي غسيل ملابس بأيام الأحد؟	Aram	تنظيف	غسيل
16222	corpus-6-test-corpus-26-train	هل توجد خدمة نقل بالحافلات إلى متحف فورد ؟	في خدمة باصات بتروح على متحف فورد؟	في خدمة باصات للروحة على متحف فورد؟	Aram	تنقل	بتودي					MSA
1585	corpus-6-test-corpus-26-train	أنا من النرويج .	أني من النرويج.	أنا من النرويج.	Aram
9948	corpus-6-test-corpus-26-train	عشرة طوابع من فضلك .	عشر طوابع لو سمحت.	عشر تمبات بالرجاء.	Aram
12333	corpus-6-test-corpus-26-train	هل يمكنك أن تجر سيارتي ؟	ممكن تجرب سيارتي؟	ممكن تجرب سيارتي؟	Aram							MSA
8418	corpus-6-test-corpus-26-train	إنه سمك ثعبان مشوي مع مرقة خاصة فوق سلطانية من الأرز .	هاذ سمك الانقليس مع صلصة خاصة محطوطة فوق سلطانية الرز.	هاي سمكة حية مشوية مع شوربة خاصة على طسة رز.	Aram	سمك الثعبان	انقليس	موضوعة	محطوطة
16888	corpus-6-test-corpus-26-train	هل يمكنني إعادتها في مدينة مختلفة ؟	بقدر أرجعها بمدينة ثانية؟	بقدر أرجعها بمدينة ثانية؟	Aram	مختلفة	ثانية	أعيدها	أرجعها			MSA
9029	corpus-6-test-corpus-26-dev	عندي الدواء الخاص بي .	عندي الدوا تاعي.	عندي دوائي الخاص.	Aram	الخاص بي	تاعي
9463	corpus-6-test-corpus-26-train	هل لديكم أفلام للصيف ؟	عندكو أفلام للصيف؟	عندكم أفلام الصيف؟	Aram	لديكم	عندكو
1506	corpus-6-test-corpus-26-train	هل تريد أن تذهب للتسوق معي بعد الظهر ؟	بتحب تيجي معي نتسوق بعد الظهر؟	بدك تروح تتسوق معي بعد الظهر؟	Aram	تذهب	تيجي
18906	corpus-6-test-corpus-26-train	نعم ، سيدي . كيف تريدني أن اقطعها ؟	أيوة ، يا سيدي . كيف بدك إني أقصها؟	أيوة ، يا صاحبي. كيف بدك إني أقصها؟	Aram	أقطعها	أقصها					MSA
17854	corpus-6-test-corpus-26-train	عندما أعود ثانية إلى اليابان ، سأكتب خطاباً . وإذا كان لديك وقت ، من فضلك أرسل لي خطاباً .	لما أرجع مرة ثانية لليابان، رح أكتب رسالة. وإذا كان عندك وقت، تكرم ابعثلي انا رسالة.	لما الأرجع تاني لليابان، رح أكتب رسالة. وإذا الكان عندك وقت، تكرم ابعتلي انا رسالة.	Aram	من فضلك	تكرم	أعود	أرجع			MSA
5083	corpus-6-test-corpus-26-train	فراولة ، من فضلك .	فراولة، لو سمحت.	فرولة ، لو سمحت .	Aram
11754	corpus-6-test-corpus-26-dev	هل تفضل ماسكات للشعر أصغر أم أكبر ؟	بتحبي القناع للشعر أصغر ولا أكبر؟	بتحبي القناع للشعر أصغر ولا أكبر؟	Aram							MSA
12941	corpus-6-test-corpus-26-train	بالتأكيد . متى تود أن تلعب جولف ؟	طبعاً. أميت بدك تلعب جولف؟	طبعاً. إمتى بدك تلعب جولف؟	Aram	متى	أميت	بالتأكيد	طبعاً			MSA
16893	corpus-6-test-corpus-26-train	من فضلك اجعل الجزء العلوي أطول قليلاً .	من فضلك خلي الجزء الفوقاني أطول شوي.	من فضلك خلي الجزء الفوقاني أطول شوي.	Aram	علوي	فوقاني	اجعل	خلي			MSA
1003	corpus-6-test-corpus-26-train	كم أوقية من العطر أستطيع الحصول عليه من غير رسوم ؟	كم وقية من العطر بقدر أوخذها بدون رسوم ؟	أديش أوقية عطر بقدر أجيبها بلا رسوم؟	Aram	من غير	بدون	حصول	أوخذ
14693	corpus-6-test-corpus-26-test	معذرة , قم بالضغط على مصراعي النافذة الخشبيين , من فضلك .	عفواً، نزل اباجور الشباك الخشب , لو سمحت.	معذرة، اضغط على الشباك الخشبي, لو سمحت.	Aram	مصراع	اباجور					MSA
14683	corpus-6-test-corpus-26-dev	لدي ثلاث حقائب .	عندي ثلث شناتي.	عندي تلات شناتي.	Aram	لدي	عندي					MSA
5916	corpus-6-test-corpus-26-train	هذا البيت يبدو مريحا للمعيشة فيه , أليس كذلك ؟	هاد البيت مبين كثير مريح العيشة فيه، مش هيك؟	هاي الدار بتبين مرتاحة للسكن فيها, مو صحيح؟	Aram	معيشة	عيشة
17805	corpus-6-test-corpus-26-train	أريد أن أغسل ملابسي في وقت لاحق اليوم .	بدي أغسل وعيتي بوقت ثاني اليوم.	بدي أغسل هدومي بعدين اليوم.	Aram	لاحق	ثاني	ملابسي	وعيتي			MSA
11880	corpus-6-test-corpus-26-train	أرجو ذلك .	بتمنى هيك.	بتمنى هيك.	Aram							MSA
442	corpus-6-test-corpus-26-test	واحد لنيويورك ، من فضلك .	واحد لنيويورك، إذا سمحت.	واحد لـ نيويورك، يعني بالله عليك.	Aram	من فضلك	إذا سمحت
1492	corpus-6-test-corpus-26-train	لا ، إنها لا تشمل الضريبة ومصاريف الخدمة .	لا، هي ما بتشمل الضريبة ومصاريف الخدمة.	لا، ما بتشمل الدافعة ورسوم الخدمة.	Aram	لا	ما	إنها	هي
4036	corpus-6-test-corpus-26-train	قم بها بطريقتك .	اعملها بطريقتك.	اعملها بطريقتك.	Aram	قم	اعملها
19501	corpus-6-test-corpus-26-train	كم تستغرق مشياً على الأقدام ؟	قديش بتوخذ وقت مشي عالجرين؟	قديش بتاخذ وقت مشي عالأرجل؟	Aram	الأقدام	الجرين	تستغرق	بتوخذ			MSA
2035	corpus-6-test-corpus-26-train	هل يمكنني الحصول على برنامج ؟	بقدر آخذ برنامج؟	ممكن أحصل على برنامج؟	Aram	أحصل	آخذ	هل يمكنني	بقدر
19094	corpus-6-test-corpus-26-train	من فضلك سجل عنوان الاتصال بك هنا .	من فضلك اكتب عنوانك للتواصل معك هون.	من فضلك اكتب عنوانك للتواصل معك هون.	Aram	إتصال	تواصل	سجل	اكتب			MSA
11633	corpus-6-test-corpus-26-train	نعم ، يا سيد تاناكا هناك رسالتان لك .	أيوة، يا سيد تاناكا، في عندك رسالتين.	أيوة، يا سيد تاناكا، في عندك رسالتين.	Aram							MSA
19057	corpus-6-test-corpus-26-train	هل لي في شيء من لحم الخنزير والبيض ؟	ممكن شوية من لحم الخنزير والبيض؟	ممكن اكون عندي شوية من لحم الخنزير والبيض؟	Aram	شيء	شوية					MSA
74	corpus-6-test-corpus-26-train	إذا حدث ذلك ، من فضلك أتصل بي .	اذا صار هيك ، لو سمحت رنلي .	لو صار هيك، يرجى تحكي معي.	Aram	اتصل	رن	ذلك	هيك
10562	corpus-6-test-corpus-26-train	أوه ، آسف لأني أزعجتك .	اووه، معذرة الك ازعجتك.	اووه، معذرة الك ازعجتك.	Aram							MSA
19215	corpus-6-test-corpus-26-test	هل يمكن أن أقيس مقاس تسعة .	ممكن أقيس مقاس تسعة ؟	بدي أقيس مقاس تسعة بإمكاني؟	Aram							MSA
11047	corpus-6-test-corpus-26-test	ملابسه دائماً موضة قديمة .	هدومه دايما موضة قديمة.	هدومه دايما موضة قديمة.	Aram							MSA
4505	corpus-6-test-corpus-26-train	هلا حجزت لي تاكسي الساعة السادسة صباح غد , من فضلك ؟	ممكن تحجزلي تكسي الساعة ستة الصبح لبكرا ، لو سمحت؟	ممكن تحجزلي تكسي الساعة ستة الصبح بكرة، لو سمحت؟	Aram	هلا	ممكن
2552	corpus-6-test-corpus-26-test	إنه صحيح هنا .	هو صحيح هون.	هاي صحيحة هون.	Aram	إنه	هو
13685	corpus-6-test-corpus-26-test	هل يمكن أن تدخل معه فكة صغيرة ؟	بتقدر ادخل معه شوية فراطة؟	بتقدر دخل معه فكة صغيرة؟	Aram	فكة	فراطة					MSA
9303	corpus-6-test-corpus-26-train	أنا حقا آسف .	أني جد آسف.	أنا جدا آسف.	Aram	حقا	جد
17438	corpus-6-test-corpus-26-train	لقد طلبت ذلك .	طلبت هاظ.	طلبت هاد.	Aram	ذلك	هاظ					MSA
9051	corpus-6-test-corpus-26-train	ما تكلفة هذا في اليوم ؟	قديش تكلفته ليوم واحد؟	كم سعر هاد يوميا؟	Aram
16140	corpus-6-test-corpus-26-dev	لا توجد أية مشاكل .	ما في أي مشاكل.	ما في أي مشاكل.	Aram	توجد	في	أية	أي			MSA
19045	corpus-6-test-corpus-26-train	أجل . سنصل في الثامنة حسب التوقيت المحلي .	أها. رح نوصل الساعة ثمنية بالتوقيت المحلي.	أها. رح نوصل الساعة الثامنة بالتوقيت المحلي.	Aram	نصل	نوصل	ثمانية	ثمنية			MSA
6413	corpus-6-test-corpus-26-dev	هل لديك واحد أكبر ؟	عندك واحد أكبر؟	عندك واحد أكبر؟	Aram
3397	corpus-6-test-corpus-26-train	أنا كينجي .	أني كينجي.	أنا كينجي .	Aram
17079	corpus-6-test-corpus-26-train	إنه المبنى الثاني على يسار هذا المبني الأبيض .	البناية الثانية على يسار البناية البيضا.	هاذا التاني بناية على يسار البناية البيضاء.	Aram	مبنى	بناية	بيضاء	بيضا			MSA
2676	corpus-6-test-corpus-26-train	أعطني قطعة لحم الخنزير هذه ، ولكن ليس بسمك تلك .	أعطييني قطعة لحمة الخنزير هاي، بس ما تكون سميكة مثل هذيك.	عطيني هالقطعة من لحم الخنزير، بس ما بدي ذاك السمك.	Aram	أعطني	أعطيني	تلك	هذيك
16495	corpus-6-test-corpus-26-train	لدي موعد آخر .	عندي موعد ثاني.	عندي موعد تاني.	Aram							MSA
13629	corpus-6-test-corpus-26-train	لدي غرفة جاهزة لك في جراند هويتل . هل تستطيع الذهاب إلى هناك ؟	عندي غرفة جاهزة إلك بالجراند هوتيل. بتقدر تروح لهناك؟	عندي غرفة جاهزة لك بالجراند هوتيل. بتقدر تروح هنيك؟	Aram	لك	إلك	تذهب	تروح			MSA
14573	corpus-6-test-corpus-26-train	أرني واحدة لإحدى الشابات .	وريني وحدة لوحدة من الصبايا.	عرضلي وحدة لوحدة من البنات.	Aram	شابات	صبايا	لإحدى	لوحدة			MSA
1474	corpus-6-test-corpus-26-train	أود أن أحجز غرفة لهذه الليلة .	بدي أحجز غرفة لهاي الليلة.	بدي حجز غرفة لليلة اليوم.	Aram	هذه	هاي
4685	corpus-6-test-corpus-26-train	لقد خلعت البنطلون .	شلحت البنطلون.	شلت البنطلون.	Aram	خلعت	شلحت
6547	corpus-6-test-corpus-26-train	إنها رائعة .	هاي روعة.	هي كتير حلوة.	Aram	رائعة	روعة
19809	corpus-6-test-corpus-26-train	أهذه هي الحافلة التي توصل إلى وسط المدينة ؟	هاظ هو الباص اللي بوصل لوسط البلد؟	هاي هي الباص اللي بوصل لوسط البلد؟	Aram							MSA
19005	corpus-6-test-corpus-26-train	أتظن ذلك ؟	بتظن هيك؟	بتظن هيك؟	Aram							MSA
5458	corpus-6-test-corpus-26-train	أود أن أرسله عن طريق البريد .	حاب أبعثه عن طريق البريد.	بدي أبعته عبر البريد.	Aram	أود	حاب
17869	corpus-6-test-corpus-26-train	أشكرك ثانية لأنك ذكرتني . هل يميل كثير من الناس أن ينسوا توقيع أسمائهم ؟	بشكرك مرة ثانية عشان ذكرتني. بروح كثير من الناس تنسى توقع ع أسمائهم ولا شو؟	بشكرك مرة تانية عشان ذكرتني. كتير من الناس بتحب تنسى توقع ع أسمائهم ولا شو؟	Aram	يميل	بروح					MSA
9634	corpus-6-test-corpus-26-test	هلا أرسلت تاكسي إلى المدخل الرئيسي لـ ويستمانستر مول ؟	ممكن تودي تكسي للمدخل الرئيسي بويستمانستر مول؟	قادر تبعتلي تاكسي على الدخلة الرئيسية لـ ويستمانستر مول؟	Aram	ترسل	تودي
4828	corpus-6-test-corpus-26-train	هل لديكم أية جولة سياحية أخرى ؟	عندك أي رحلة ثانية؟	عندكم أي رحلة سياحية ثانية ؟	Aram	جولة	رحلة
18334	corpus-6-test-corpus-26-dev	السيارة تصدر صاخبا غريبا .	السيارة بطلع صوت غريب وعالي.	السيارة عم تعمل صوت غريب وعالي.	Aram	تصدر	بطلع	صاخب	عالي			MSA
12131	corpus-6-test-corpus-26-train	هذه سبعون دولار .	هاي سبعين دولار.	هاي سبعين دولار.	Aram							MSA
1434	corpus-6-test-corpus-26-train	أنا شديد الحساسية للقطط .	أني بتحسس كثير من البسس.	أنا كتير حساس للقطط.	Aram	قطط	بسس	شديد	كثير
17097	corpus-6-test-corpus-26-train	لا . قليلاً في الأمام . هناك ، نعم .	لا. شوي لقدام. هناك، إيوه.	لا. شوي لقدام. هنيك، إيه.	Aram	أمام	قدام					MSA
19415	corpus-6-test-corpus-26-train	ركن المدخنين ، من فضلك . وشباك بجوار النافذة ، من فضلك .	ركن الشيشانيين، إذا سمحت. وشباك جمب النافذة، إذا سمحت.	ركن الشيشانيين، إذا سمحت. وشباك جمب النافذة، إذا سمحت.	Aram							MSA
4034	corpus-6-test-corpus-26-train	هل يكلفني دخول هذا المبنى أي أموال ؟	بدفع أي مصاري إذا فتت على هاي العمارة؟	بدفع فلوس لأدخل هاد المبنى ؟	Aram	أموال	مصاري	دخلت	فتت
9910	corpus-6-test-corpus-26-train	سأكون هنا حتى التاسعة . يحدوني الأمل أن تتمكن من القبض على المجرم في أقرب وقت ممكن .	راح أظل هون للساعة تسعة. بتمنى إنكم تمسكوا المجرم بأسرع وقت.	رح اكون هون للتسعة. بتمنى انك تقدر تمسك المجرم بأقرب فرصة.	Aram	تقبض	تمسك
18957	corpus-6-test-corpus-26-train	شكراً لك . من فضلك عاود مرة أخرى .	مشكور. يلا جرب مرة ثانية من فضلك.	مشكور. يللا، اعملها مرة تانية من فضلك.	Aram	هيا	يلا					MSA
6724	corpus-6-test-corpus-26-test	فاتتني محطتي .	راح علي الموقف.	مرقت علي محطتي	Aram	فاتني	راح علي
14099	corpus-6-test-corpus-26-train	أين يمكنني أن أقيم أثناء الجولة ؟	وين ممكن أسكن خلال الرحلة؟	وين ممكن أسكن وقت الجولة؟	Aram	أقيم	أسكن	أثناء	خلال			MSA
4640	corpus-6-test-corpus-26-train	إنه لمن دواعي السرور أن أتحدث معك .	إنسريت بالحكي معك.	فرحان كتير اني احكي معك.	Aram	سررت	إنسريت
13913	corpus-6-test-corpus-26-train	أي مقاس تريد ؟	شو السايز اللي بدك ياه؟	شو المقاس اللي بدك ياه؟	Aram					مقاس : سايز		MSA
1876	corpus-6-test-corpus-26-dev	بالتأكيد ، هل تريد تسريحة متموجة دائما ؟	أكيد، بدك اياه كيرلي دايما؟	أكيد، بدك تسريحة متجعدة على طول؟	Aram	بالتاكيد	أكيد	دائما	دايما
11916	corpus-6-test-corpus-26-train	إلى اليسار ، من فضلك .	على اليسار، لو سمحت.	على اليسار، لو سمحت.	Aram							MSA
12712	corpus-6-test-corpus-26-train	لقد أتلفت حقيبتي .	دمرت شنتتي.	دمرت شنتتي.	Aram							MSA
6214	corpus-6-test-corpus-26-train	البيتزا لذيذة . من صنعها ؟	هاي البيتزا زاكية. مين عملها؟	البيتزا زاكية. مين عملها؟	Aram	صنعها	عملها	لذيذ	زاكية
1404	corpus-6-test-corpus-26-train	أخشى أن أسأل ، لكن ماذا تعني ؟	بخاف اسأل، بس شو قصدك؟	خايف أسأل ، بس شو بتعني؟	Aram	أخشى	بخاف	تعني	قصدك
7756	corpus-6-test-corpus-26-train	لا ، من فضلك اجلس وانتظر . سأعود بعد قليل .	لا، لو سمحت اقعد واستنى. راح أرجعلك بعد شوي.	لا، تكرم اتسلى و انتظر. راح ارجع بعد شوي.	Aram	اجلس	اقعد	قليل	شوي
15476	corpus-6-test-corpus-26-train	الكعب مرتفع جداً .	الكعب عالي كثير.	الكعب عالي كتير.	Aram	جداً	كثير	مرتفع	عالي			MSA
10155	corpus-6-test-corpus-26-train	كم سيستغرق إصدار التأشيرة لي ؟	قديش الفيزا بدها وقت عشان تطلع؟	أديش رح ياخد وقت تصدير الفيزا الي؟	Aram	تصدر	تطلع			تأشيرة : فيزا
1985	corpus-6-test-corpus-26-train	لقد تعطلت سيارتي .	خربت سيارتي .	عطلت عربيتي.	Aram	تعطلت	خربت
16487	corpus-6-test-corpus-26-train	كيف أثر الركود على الشركة ؟	شلون أثر الركود عالشركة ؟	شو العائد عالشركة من الركود؟	Aram	كيف	شلون					MSA
9077	corpus-6-test-corpus-26-train	توجد رحلات جوية على شركات جال وانا التي تقلع في الساعة العاشرة وخمسة وخمسين دقيقة . ولكن , للأسف كلتا الرحلتين محجوزتان .	في طيارات على شركات جال وانا اللي بتغادر الساعة عشرة وخمسة وخمسين دقيقة. بس، للأسف الطيارتين مفللات.	في رحلات طيران على شركات الجال وانا اللي طايرة ع الساعة عشرة وتلت قرش. بس، للأسف، الرحلتين محجوزات.	Aram	محجوزتان	مفللات
2765	corpus-6-test-corpus-26-train	هل هذا سيفسد ؟	هاذ رح يخرب؟	هاي رح تخرب؟	Aram	يفسد	يخرب
2960	corpus-6-test-corpus-26-train	هل يمكنك أن تخبرني بقيمة هذه المكالمة ؟	بتقدر تحكيلي تكلفة هاي المكالمة؟	ممكن تقلي كم سعر هذه المكالمة؟	Aram	قيمة	تكلفة	هذه	هاي
18437	corpus-6-test-corpus-26-train	من الأفضل أن تضبط المرآة العاكسة للرؤية الخلفية .	أحسن شي تزبط المراية الخلفية.	أحسن شي تظبت المراية اللي بتشوف فيها الخلف.	Aram	تضبط	تزبط					MSA
4016	corpus-6-test-corpus-26-train	كم أجرة التاكسي حتى هذا الفندق ؟	كم أجرة التكسي لعند الفندق؟	أديش الباص على هاد الفندق؟	Aram	حتى	لعند
1167	corpus-6-test-corpus-26-train	أريد مزيلا لطلاء الأظافر .	بدي أسيتون للمناكير.	بدي مزيل للطلاء على الأظافر.	Aram	مزيل طلاء	أسيتون			منكاير: طلاء أظافر
12599	corpus-6-test-corpus-26-train	ما هي مكونات هذا الطبق ؟	شو مكونات هالصحن؟	شو مكونات هالصحن؟	Aram							MSA
2001	corpus-6-test-corpus-26-train	متى ينبغي أن آتي ؟	متى لازم آجي ؟	إمتى لازم أجي؟	Aram	ينبغي	لازم	آتي	آجي
14818	corpus-6-test-corpus-26-train	هل يمكن أن تخبرني عن الأماكن الشيقة هنا ؟	ممكن تحكيلي عن الأماكن الحلوة هون؟	ممكن تحكيلي عن الأماكن الحلوة هون؟	Aram	شيق	حلو	تخبرني	تحكيلي			MSA
8574	corpus-6-test-corpus-26-train	حسنا ، اضغط تسعة وصفر واحد واحد ، ثم الكود الخاص بالبلد ورقم الهاتف .	طيب، إكبس تسعة وصفر واحد واحد، وبعدين الكود تبع البلد ورقم التلفون.	ممتاز، اضغط تسعة و صفر واحد واحد، بعدين كود البلد و رقم التلفون.	Aram	اضغط	إكبس	الخاص	تبع	هاتف : تلفون
2496	corpus-6-test-corpus-26-test	أعتقد أنك ارتكبت خطأً . الغرفة دفع ثمنها مسبقاً . معي إيصال .	بظن إنك غلطت. الغرفة حاسبت عنها قبل. معي وصل.	بفكر إنك غلطت. الغرفة دفعت عليها قبل. عندي الايصال.	Aram	إيصال	وصل	أعتقد	بظن
14590	corpus-6-test-corpus-26-train	هل يمكنك أن تتحرك بهذا الاتجاه ؟	بتقدر تمشي بهالجهة؟	بتقدر تمشي بهالجهة؟	Aram	اتجاه	جهة					MSA
17660	corpus-6-test-corpus-26-train	سيغادر قطارك من الرصيف رقم ثمانية .	رح يطلع قطارك من السكة رقم ثمانية.	رح يطلع قطارك من المنصة رقم تمانية.	Aram	يغادر	يطلع	رصيف	سكة			MSA
19148	corpus-6-test-corpus-26-test	أريد غرفة أخرى .	بدي غرفة ثانية.	بدي غرفة تانية.	Aram	أخرى	ثانية					MSA
17120	corpus-6-test-corpus-26-train	لماذا يحدث هذا ؟	ليش بصير هاذ ؟	ليش هاي الحكاية صايرة؟	Aram	يحدث	بصير	لماذا	ليش			MSA
18986	corpus-6-test-corpus-26-test	ما الرقم الذي أطلب منه هنا ؟	شو الرقم اللي بطلب منه هون؟	شو الرقم اللي بدي أطلب منه هون؟	Aram							MSA
11973	corpus-6-test-corpus-26-test	هل يوجد مطعم أرخص قريب من هنا ؟	في مطعم رخيص قريب من هون؟	في مطعم رخيص قريب من هون؟	Aram							MSA
16771	corpus-6-test-corpus-26-train	هل يوجد مطعماً يمكنك أن تزكيه بالقرب من هنا ؟	في مطعم بتنصح فيه قريب من هون؟	في مطعم بتنصح فيه قريب من هون؟	Aram	يوجد	في					MSA
14509	corpus-6-test-corpus-26-train	أوبرا ميتروبوليتان .	أوبرا المتروبوليتان.	أوبرا المتروبوليتان.	Aram							MSA
3860	corpus-6-test-corpus-26-train	أين المصعد ؟	وين الأصنصير؟	وين الاسانسير؟	Aram	أين	وين			مصعد : اصنصير
17757	corpus-6-test-corpus-26-train	هل يمكنك أن ترني أشياء أخري ذات تصميمات مختلفة .	ممكن توريني شغلات ثانية بأشكال غير؟	ممكن توريني حجات ثانية مصممة بشكل مختلف؟	Aram	مختلف	غير	تصميمات	أشكال			MSA
8803	corpus-6-test-corpus-26-train	ليس بمقدورك تغيير وظيفتك بسهولة .	ما بتقدر تغير شغلك ببساطة.	مش قادر تغير شغلك بسهولة.	Aram	وظيفتك	شغلك	بسهولة	ببساطة
16089	corpus-6-test-corpus-26-train	ماذا تسمون هذا بالإنجليزية ؟	شو بتسموه هاذ بالإنجليزي؟	شو بتسموه هاد بالإنجليزي؟	Aram	ماذا	شو					MSA
2180	corpus-6-test-corpus-26-train	سأصل في التاسع من مارس وأغادر في الرابع عشر .	راح أوصل بتسعة ثلاث وراح أروّح بأربعطعش.	رح وصل يوم التاسع من مارس ورح اروح يوم الأربع عشر.	Aram	رابع عشر	أربعطعش	أغادر	أروّح
6550	corpus-6-test-corpus-26-train	هل ستحدد موعداً للخروج معي ؟	بدك تحدد موعد لتطلع معي؟	حتحدد وقت لنطلع سوا؟	Aram	تخرج	تطلع
9	corpus-6-test-corpus-26-train	لم اسمع بهذا العنوان من قبل بالقرب من هنا .	ما سمعت بهاذ المكان قبل هيك بالمنطقة هون .	ما سمعت بهالعنوان من قبل قريب من هون.	Aram	هنا	هون
1062	corpus-6-test-corpus-26-train	سوف أحضر لك العرض الأسبوع القادم .	بدي اجهزلك العرض الاسبوع الجاي.	راح أجيبلك العرض الأسبوع الجاي.	Aram	القادم	الجاي
7206	corpus-6-test-corpus-26-dev	صديقي مريض جداً . هل تستطيع أن تطلب دكتور ، من فضلك ؟	صاحبي كثير مريض. ممكن تطلب الدكتور، لو سمحت؟	صاحبي مريض كتير. بتقدر تطلعلي دكتور، لو سمحت؟	Aram	صديقي	صاحبي
19294	corpus-6-test-corpus-26-train	هل أخذت تذكرة الحافلة ؟	اخذت تذكرة الباص؟	اخذت تذكرة الباص؟	Aram	حافلة	باص					MSA
9885	corpus-6-test-corpus-26-train	يوجد لدى حوالي ألفي وخمسمائة دولار بالين الياباني .	أنا معي حوالي ألفين وخمسميت دولر بالين الياباني.	عندي حوالي الفين وخمسمية دولار ين ياباني.	Aram	لدي	معي
16679	corpus-6-test-corpus-26-train	هل يمكنني استئجار مرشداً يتحدث اللغة اليابانية ؟	ممكن أستأجر دليل بسولف ياباني؟	ممكن أكرج مرشد يحكي ياباني؟	Aram	يتحدث	بسولف					MSA
16536	corpus-6-test-corpus-26-dev	هذا بعينه ما كنت أبحث عنه .	هاي بالزبط اللي كنت بدور عليه.	هاي بالزبط اللي كنت عم بدور عليها.	Aram	بالزبط	بعينه	أبحث	بدور			MSA
19036	corpus-6-test-corpus-26-test	رقم مقعدي دي اثنا عشر . أين هو ؟	رقم كرسيي دي اثنعش. وين هو؟	رقم كرسيي ده اتناشر. وين هو؟	Aram	اثنا عشر	اثنعش	مقعد	كرسي			MSA
14441	corpus-6-test-corpus-26-train	فينس وليندا يريدان أن يبقيا بمفرديهما ، لذا أخشى أنني لا بد أن أبقى هنا هذه الليلة .	فينس وليندا بدهم يظلوا لحالهم، فبخاف انو لازم اظل هون الليلة.	فينس وليندا عايزين يضلوا لحالهم، فبخاف انو لازم اضل هون الليلة.	Aram	أبقى	أظل	بفرديهما	لحالهم			MSA
14434	corpus-6-test-corpus-26-train	إنها تبعد حوالي تسعة وتسعون ميلا .	هي بتبعد حوالي تسعة وتسعين ميل.	هي بتبعد حوالي تسعة وتسعين ميل.	Aram	إنها	هي					MSA
15470	corpus-6-test-corpus-26-train	حسناً ، تم إعادة التأكيد على حجزك .	ماشي، اتأكدنا من حجزك مرة ثانية.	ماشي، اتأكدنا من حجزك مرة ثانية.	Aram							MSA
13333	corpus-6-test-corpus-26-dev	حسناً ، فلنق نظرة عليك .	طيب ، خلينا نطل عليك .	طيب ، خلينا نشوفك .	Aram	حسناً	طيب	نلقي نظرة	نطل			MSA
18274	corpus-6-test-corpus-26-test	هل يجب على أن أجيب بـ نعم أو بـ لا ؟	لازم اجاوب بـ اه أو بـ لأ ؟	لازم اجاوب بـ ايه أو بـ لأ ؟	Aram	أجيب	أجاوب					MSA
4418	corpus-6-test-corpus-26-train	من فضلك ، بدلي شيك المسافرين إلي نقود .	لو سمحت اصرفلي هاد الشك السياحي كاش.	من فضلك، غيريلي شيك المسافرين لـ نقود.	Aram	بدل	اصرف	شيك	شك	نقود : كاش
15347	corpus-6-test-corpus-26-train	من فضلك دلني على أرخص وسيلة للذهاب إلى سان فرانسيسكو .	من فضلك دلني على أرخص طريقة حتى أروح على سان فرانسيسكو.	من فضلك دلني على أرخص طريقة لروح على سان فرانسيسكو.	Aram	وسيلة	طريقة					MSA
11767	corpus-6-test-corpus-26-test	أريد غرفة مفردة بحمام لقاء ثمانين دولارا ، من فضلك .	بدي غرفة فردية مع حمام بـثمانين دولار, لو سمحت.	بدي غرفة فردية مع حمام بـثمانين دولار, لو سمحت.	Aram							MSA
17216	corpus-6-test-corpus-26-train	من فضلك ، هل رسمت لي خريطة بسيطة من هنا ؟	من فضلك، بتقدر ترسملي خريطة سهلة من هون؟	من فضلك، بتقدر ترسملي خريطة سهلة من هون؟	Aram	بسيطة	سهلة					MSA
12976	corpus-6-test-corpus-26-dev	ليس لدي أية مضارب أو أحذية .	ما عندي لا مظارب ولا أحذية.	ما عندي ولا عصاية ولا حذاء.	Aram	ليس	ما	مضارب	مظارب			MSA
18836	corpus-6-test-corpus-26-train	أوه ، يبدو أنني افقد شيء ما كل وقت أسافر فيه .	أوه، شكلني بضيع اشي كل مرة بسافر فيها.	أوه، بده يظهر إني بفقد شي كل مرة بسافر فيها.	Aram	وقت	مرة					MSA
16478	corpus-6-test-corpus-26-train	أجل ، إنها مفتوحة من التاسعة حتى التاسعة .	أها ، هي فاتحة من الساعة تسعة للساعة تسعة.	أها ، إنها مفتوحة من الساعة 9 للساعة 9.	Aram	مفتوحة	فاتحة	تاسعة	تسعة			MSA
16967	corpus-6-test-corpus-26-train	سيأتي القطار السريع التالي بعد ساعة .	راح يجي القطار السريع الجاي بعد ساعة.	راح يجي القطار السريع الجاي بعد ساعة.	Aram							MSA
14311	corpus-6-test-corpus-26-train	مرحبا . كيف حالك ؟	مرحبا . كيف حالك؟	أهلا. كيف حالك؟	Aram							MSA
6766	corpus-6-test-corpus-26-train	تاريخ الانتهاء تسعة عشر من مارس تسعة وتسعين .	تاريخ انتهاء الصلاحية تسعطعش من شهر ثلاث التسعة وتسعين.	تاريخ الانتهاء التاسع عشر من مارس تسعة وتسعين.	Aram	تسعة عشر	تسعطعش
18552	corpus-6-test-corpus-26-train	هلا احتفظت بهذا لي ؟	ممكن تظبلي هاد؟	ممكن تخزنلي هاد؟	Aram	تحتفظ	تظب					MSA
13015	corpus-6-test-corpus-26-train	هل تقبل بالين الياباني ؟	بتوخذ بالين ياباني؟	بتقبل بالين ياباني؟	Aram	تقبل	توخذ					MSA
17842	corpus-6-test-corpus-26-train	من فضلك ، اكتب رقم الغرفة في الخلف .	من فضلك ، اكتب رقم الغرفة بقفى الورقة.	من فضلك ، اكتب رقم الغرفة بالجهة الخلفية.	Aram	خلف	قفى					MSA
17038	corpus-6-test-corpus-26-train	هل يمكنك أن تصلح ذلك ؟	بتقدر تصلح هاي؟	ممكن تصلح هاي؟	Aram							MSA
3179	corpus-6-test-corpus-26-train	سيداتي سادتي ، لدينا على متن رحلتنا اليوم مضيفين يتحدثون اليابانية يمكن التعرف عليهم من خلال الشارة التي يلبسونه . إذا كنت تعرف أي شخص يريد مساعدة في الترجمة ، من فضلك دعنا نعرف .	سيداتي وسادتي،برحلتنا اليوم، عنا مضيفين بحكوا ياباني بتعرفوهم من الباجة اللي لابسينها. إذا بتعرف إنه أي حد بحتاج مساعدة بالترجمة، لو سمحت خلينا نعرف.	سيداتي وسادتي، عنا اليوم بالرحلة مضيفين بحكوا الياباني، ممكن تعرفوهم من البيدج الي بلبسوها. اذا بتعرفو حدا بده مساعدة بالترجمة، لو سمحتو خبرونا.	Aram	شخص	حد	يتحدثون	بحكوا	شارة:باجة
6609	corpus-6-test-corpus-26-train	هل يجب أن أدفع الرسم الإضافي عندما أدخل مبنى ؟	لازم أدفع رسوم ثانية بس أفوت عأي مبنى؟	لازم أدفع الرسوم الزيادة لما أدخل المبنى؟	Aram
14538	corpus-6-test-corpus-26-train	لقد انكسرت السنة .	انكسرت السنة.	كسرت السنة.	Aram							MSA
15020	corpus-6-test-corpus-26-test	تبدو البونساي كهواية شخص هرم .	شكلها البونساي هواية الختيار.	مبينة البونساي متل هواية الشخص الكبير.	Aram	تبدو	شكلها	هرم	ختيار			MSA
7291	corpus-6-test-corpus-26-test	لدينا غرفة مزدوجة بحمام بخمسة و ثمانين دولار .	عنا غرفة مزوجة مع حمام بخمسة وثمنين دولار.	عندنا غرفة زوجية مع حمام بتكلف 85 دولار.	Aram	مزدوجة	مزوجة
14184	corpus-6-test-corpus-26-train	هل هذه من نوع ليفي خمسة صفر المعتمدة ؟	هاي من نوع ليفي خمسة صفر الأصلية؟	هاي من ليفي خمسة صفر المعتمدة؟	Aram	معتمدة	أصلي					MSA
13264	corpus-6-test-corpus-26-dev	هل يمكن أن أبيت عندكم الليلة ؟	بقدر أبات عندكو الليلة؟	ممكن أصير عندكم الليلة؟	Aram	أبيت	أبات					MSA
10098	corpus-6-test-corpus-26-dev	هل تود منضدة في المطعم الرئيسي أو في غرفة خاصة يا سيدي ؟	سيدي، بتحب طاولة بالمطعم الرئيسي ولا بغرفة خاصة؟	عايز طاولة بالمطعم العمومي ولا بغرفة خاصة يا أستاذ؟	Aram	منضدة	طاولة
6437	corpus-6-test-corpus-26-train	مائة بالمائة قطن .	مية بالمية قطن .	مية بالمية قطن.	Aram	بالمائة	بالمية
6492	corpus-6-test-corpus-26-train	إنها لذيذة جداً .	كثير طيبة.	هاي زاكية كتير.	Aram	لذيذة	طيبة
13477	corpus-6-test-corpus-26-train	هل أستطيع التحدث مع المدير ؟	بقدر أحكي مع المدير؟	بقدر أحكي مع الداير؟	Aram	أتحدث	أحكي					MSA
14347	corpus-6-test-corpus-26-test	أنا آسف ، هو ليس بالداخل الآن .	أني آسف، هو مش جوا هسا.	أنا آسف، هو مش بالداخل هسا.	Aram	بالداخل	جوا					MSA
14426	corpus-6-test-corpus-26-test	أريد غرفة بسريرين . ما ثمن الغرفة في الليلة ؟	بدي غرفة بتختين. قديش تكلفة الغرفة بالليل؟	بدي غرفة بسريرين. قديش بتكلف الغرفة بالليل؟	Aram	سرير	تخت	ثمن	تكلفة			MSA
12917	corpus-6-test-corpus-26-train	ابقى على الخط وانتظر لحظة من فضلك .	خليك على الخط و استنى شوي من فضلك.	خليك على الخط و استنى شوي من فضلك.	Aram							MSA
19581	corpus-6-test-corpus-26-train	هل يمكنني أن أرسل أي ميل واحد فقط قيمته دولار .	بقدر أبعث أي ميل واحد تكلفته بس دولر؟	بقدر أبعت ميل واحد بس يكلف دولار؟	Aram	قيمته	تكلفته	دولار	دولر			MSA
12969	corpus-6-test-corpus-26-train	من أين تغادر الحافلات لمشاهدة المعالم ؟	من وين بتطلع الباصات حتى نشوف المناظر؟	من وين بتطلع الباصات لشوفة المعالم؟	Aram	تغادر	بتطلع	حافلات	باصات			MSA
15145	corpus-6-test-corpus-26-dev	هل لديك ألوان أخرى من هذا ؟	عندك ألوان ثانية من هاذ؟	عندك ألوان ثانية من هاد؟	Aram	هذا	هاذ					MSA
14098	corpus-6-test-corpus-26-train	اذهب إلى نادي رياضي كل يومين .	روح عالجيم كل يومين.	روح عالجيم كل يومين.	Aram					نادي رياضي: جيم		MSA
15447	corpus-6-test-corpus-26-train	تم الفصل بين مقاعدنا .	صار فصل بين كراسينا.	صار فصل بين كراسينا.	Aram	تم	صار					MSA
16781	corpus-6-test-corpus-26-train	هل لك أن تخبرني عن مكان تحليق الطائرة الآن ؟	بتقدر تحكيلي وين بطير الطيارة هسا؟	بتقدر تحكيلي وين الطيارة طارانة هسا؟	Aram	تحلق	بطير					MSA
13942	corpus-6-test-corpus-26-train	كيف ترغب في إجراء المكالمة ؟	شلون بدك تعمل المكالمة؟	شلون بدك تعمل المكالمة؟	Aram	كيف	شلون	إجراء	عمل			MSA
19391	corpus-6-test-corpus-26-train	أفهم ذلك . أحاول استئجار سيارة سيتروين .	بفهم هالاشي. بحاول أستأجر سيارة سيتروين.	بفهم هالاشي. بحاول أستأجر سيارة سيتروين.	Aram							MSA
19147	corpus-6-test-corpus-26-test	هذه هي الغرفة اثنا عشر صفر سبعة .	هاي هي الغرفة اثنعش صفر سبعة.	هاي هي الغرفة اتناش سفر سبعة.	Aram							MSA
16586	corpus-6-test-corpus-26-train	هل لك أن تأخذ هذا ، من فضلك ؟	ممكن توخذ هاذ، لو سمحت؟	ممكن تاخذ هاد، لو سمحت؟	Aram	تأخذ	توخذ					MSA
18642	corpus-6-test-corpus-26-train	كم عمر هذا الصبي ؟	قديش عمر هالولد؟	اديش عمر هالولد؟	Aram	صبي	ولد					MSA
8183	corpus-6-test-corpus-26-train	قارب مع مرشد ، من فضلك .	قارب مع مرشد ، لو سمحت.	زورق مع دليل، لو سمحت.	Aram
6581	corpus-6-test-corpus-26-train	القهوة غير محسوبة .	القهوة مش محسوبة؟	القهوة ما بتحسبش.	Aram	غير	مش
10504	corpus-6-test-corpus-26-train	لقد أضعت تذكرة الطيران الخاصة بي .	انا ضايع تذكرة الطيران حقتي.	انا ضايع تذكرة الطيران حقتي.	Aram							MSA
18580	corpus-6-test-corpus-26-train	نعم , في بادئ الأمر ، اغسليها على منفصلة .	أيوة, بالأول, غسليها لحالها.	أيوة, بالأول, غسليها لحالها.	Aram	بادئ	أول	منفصلة	لحالها			MSA
5559	corpus-6-test-corpus-26-train	هل يمكنني أن التقط بعض الصور ؟	ممكن اوخذ شوية صور؟	ممكن أصور شوية صور؟	Aram	ألتقط	اوخذ
6966	corpus-6-test-corpus-26-train	هلا فتحت هذه الحقيبة ، من فضلك ؟ ماذا يوجد هنا .	بتقدر تفتح هاي الشنطة، لو سمحت؟ شو لقيت فيها هون؟	هلا فتحت هالشنطة، لو سمحت؟ شو اللي فيها هون؟	Aram	هلا	بتقدر
5830	corpus-6-test-corpus-26-dev	ما نوع هذه الموسيقى ؟	شو نوع هاي الموسيقى؟	شو نوع هالمزيكا؟	Aram	هذه	هاي
11491	corpus-6-test-corpus-26-dev	أريد بعض الكريم للأيدي .	بدي شوية كريم للإيد.	بدي شوية كريم للإيد.	Aram							MSA
13095	corpus-6-test-corpus-26-train	مائة غير المدخنين من فضلك .	مية غير اللي بدخنوا، لو سمحت.	مية من اللي ما بيدخنوا، لو سمحت.	Aram	مائة	مية					MSA
17311	corpus-6-test-corpus-26-train	من فضلك أعطني بعض الفكة .	لو سمحت اعطيني شوية فراطة.	لو سمحت اعطيني شوية فكة.	Aram	شوي	بعض	فكة	فراطة			MSA
12259	corpus-6-test-corpus-26-train	بالتأكيد . لدينا بعض الماركات الأمريكية الأصلية الجميلة . للكتب .	أكيد. عنا شوية ماركات أمريكية أصلية حلوة. للكتب.	أكيد. عنا شوية ماركات أمريكية أصلية حلوة. للكتب.	Aram							MSA
5245	corpus-6-test-corpus-26-train	لدي وصولها ، سوف ندفع ثمن شحنها إلى عنوان منزلك .	لما توصل. راح ندفع حق الشحن لعنوان بيتك.	لما توصل، رح ندفع ثمن شحنتها لعنوان بيتك.	Aram	منزلك	بيتك	لدى	لما
11046	corpus-6-test-corpus-26-train	إنها مشغولة .	هيه مشغولة.	هيه مشغولة.	Aram							MSA
5366	corpus-6-test-corpus-26-train	سرقت حقيبتي في الشارع .	انسرقت شنتي بالشارع.	سرقوا شنتتي في الشارع.	Aram	حقيبتي	شنتي
12421	corpus-6-test-corpus-26-train	لم تصنع هذه باليابان ، أليس كذلك ؟	ما صنعت هاي باليابان، صح؟	ما صنعت هاي باليابان، صح؟	Aram							MSA
16872	corpus-6-test-corpus-26-dev	سيبدأ الصعود على متن الطائرة الساعة الرابعة والنصف لذلك من فضلكم كونوا هناك قبل هذا الموعد .	رح يبلش الصعود على الطيارة الساعة أربعة ونص . لذالك لو سمحتو كونو هون قبل هذا الوقت.	رح يبلش الصعود على الطيارة الساعة أربعة ونص . لذالك لو سمحتو كونو هون قبل هذا الوقت.	Aram	يبدأ	يبلش					MSA
7712	corpus-6-test-corpus-26-dev	نحن هنا لمدة يوم .	إحنا هون لمدة يوم.	احنا هون ليوم.	Aram
18685	corpus-6-test-corpus-26-train	لقد فقدت شيكاتي السياحية .	ضيعت الشيكات السياحية تبعتي.	خسرت الشيكات السياحية تبعي.	Aram	فقدت	ضيعت					MSA
14530	corpus-6-test-corpus-26-train	ما أنواع الخضراوات الموجودة لديك ؟	شو هي الخضرة اللي عندك؟	شو أنواع الخضراوات اللي عندك؟	Aram	خضروات	خضرة					MSA
4801	corpus-6-test-corpus-26-train	يجب أن أنتقل إلى عربة مكيفة واحد صفر صفر . هل هذا ممكن ؟	بدي انتقل لعرباية مكيفة واحد صفر صفر. ممكن؟	لازم أروح على عربة مكيفة واحد صفر صفر. هاي ممكنة؟	Aram	عربة	عرباية
17745	corpus-6-test-corpus-26-test	نعم ، حجز لمدة ستة أيام من فضلك ، بدء من الثالث والعشرين من يوليو .	ايوه، حجز لست أيام لو سمحت، ببلش من ثلاث وعشرين ستة.	ايوا، حجز لستة أيام لو سمحت، من الثالث والعشرين من يوليو.	Aram	يوليو	ستة	يبدأ	ببلش			MSA
848	corpus-6-test-corpus-26-train	من أي مكان يمكنني أن أغير القطار الذي يوصلني إلى إدنبره ؟	منين بقدر أغير القطار اللي بوصلني لادنبرة؟	من وين بقدر أغير القطار اللي بوصلني على إدنبره؟	Aram	من أي مكان	منين
10617	corpus-6-test-corpus-26-test	أكثر منتجاتنا بيعت عبر السنوات الأربع الماضية هي الآلة الناسخة طراز أ . أكس أربعة خمسة صفر .	أغلب اللي بعناه من منتجاتنا على مرّ الأربع سنين اللي فاتت هي الآلة الناسخة، طراز أ . أكس أربعة خمسة صفر.	أغلب اللي بعناه من منتجاتنا على مرّ الأربع سنين اللي فاتت هي الآلة الناسخة، طراز أ . أكس أربعة خمسة صفر.	Aram							MSA
5617	corpus-6-test-corpus-26-dev	آسف سأعود لاحقاً .	آسف. راح أرجع بعدين.	معذرة، رح أرجع بعدين.	Aram	أعود	أرجع	لاحقاً	بعدين
13077	corpus-6-test-corpus-26-dev	هل يتحتم عليك كثيراً أن تعمل حتى ساعة متأخرة ؟	بتظطر كثير تشتغل لوقت متأخر؟	بتضطر كثير تشتغل لوقت متأخر؟	Aram	يتحتم	تظطر	تعمل	تشتغل			MSA
7662	corpus-6-test-corpus-26-train	هل لديك نفس هذا التصميم بكعب أعلى ؟	عندك نفس هاذ الديزاين بس كعب أعلى؟	عندك هاي النمط بكعب أعلى؟	Aram					تصميم : ديزاين
8850	corpus-6-test-corpus-26-train	التكلفة ، من فضلك . هل تقبلون بطاقة فيزا ؟	الحساب ، لو سمحت. يتقبلو بطاقة فيزا؟	الاجر, بتكرم. بتقبلو بطاقة فيزا؟	Aram	التكلفة	الحساب
16167	corpus-6-test-corpus-26-train	من فضلك استلق هنا .	لو سمحت، اتمدد هون.	بتراحلك، اتمدد هون.	Aram	استلق	اتمدد					MSA
17204	corpus-6-test-corpus-26-test	اسمي ميتشكو تاناكا ، ورقم الرحلة إلى طوكيو هو خمسة ، صفر ، واحد .	اسمي ميتشكو تاناكا، ورقم الرحلة لطوكيو هو خمسة، صفر، واحد.	اسمي ميتشكو تاناكا، ورقم الطيارة ل طوكيو هو خمسة، صفر، واحد.	Aram							MSA
15046	corpus-6-test-corpus-26-test	آه ، كلا . من فضلك أسرع . إننا متأخرون .	آه، لأ. لو سمحت عجل، إحنا متأخرين.	آه، لأ، يلا من فضلك اسرع، احنا متأخرين.	Aram	كلا	لأ	أسرع	عجّل			MSA
9211	corpus-6-test-corpus-26-train	ما هي أفضل جولة حتى أرى أشهر الأماكن ؟	شو هي أحسن رحلة عشان أشوف أشهر الأماكن؟	شو أحسن دورة عشان أشوف أبرز المواقع؟	Aram	حتى	عشان
15967	corpus-6-test-corpus-26-train	حسنا . مقعدان من فضلك .	ماشي. كرسيين لو سمحت.	ماشي. ابغاه دحدين لو سمحت.	Aram	مقعدان	كرسيين					MSA
10848	corpus-6-test-corpus-26-test	أظن أنه بديع المنظر .	بظن انه منظره صاير حلو.	بظن انه منظره صاير حلو.	Aram							MSA
2033	corpus-6-test-corpus-26-train	بنطلون أخر ؟	بنطلون ثاني؟	بنطلون تاني؟	Aram
3936	corpus-6-test-corpus-26-train	سأجرب بعضاً من الشراب المثلج .	بدي أجرب شوي من العصير المثلج.	رح جرب شوي من العصير البارد.	Aram	شراب	عصير
8177	corpus-6-test-corpus-26-train	هل هذا هو الطريق الصحيح إلى المحطة المركزية ؟	هاد الطريق الصح للمحطة الرئيسية؟	هاد هو الطريق الصح للمحطة الرئيسية؟	Aram	صحيح	صح	مركزية	رئيسية
8915	corpus-6-test-corpus-26-train	أريد شراء تذكارات لأصدقائي . أيمكن أن تُوصي ببعض منها ؟	بدي أشتري هدايا تذكارية لأصحابي. ممكن تنصحني بإشي؟	بدي أشتري تذكارات لصحابي. ممكن تنصحني بشوية منهم؟	Aram	توصي	تنصحني
3991	corpus-6-test-corpus-26-train	أريد الحصول على تأمين .	بدي تأمين.	بدي أخذ تأمين.	Aram
7913	corpus-6-test-corpus-26-train	آوه إلقاء نظرة على صندوقك .	واو أنا حاب أشوف صندوقك.	فرجي على صندوقك, يا زلمة!	Aram
18595	corpus-6-test-corpus-26-train	إنها أربعة عشرة .	هاي أربعطعش.	هاي أربعة عشر.	Aram	أربعة عشر	أربعطعش					MSA
12823	corpus-6-test-corpus-26-train	سأنتظر حتى يتاح الجلوس في التراس .	رح أستنا لحتى يصير الجلوس بالتراس ممكن.	رح أستنا لحتى يصير الجلوس بالتراس ممكن.	Aram							MSA
10749	corpus-6-test-corpus-26-dev	يمكنك أن تمكث في منزلي .	ممكن تفضل تقعد ببيتي.	ممكن تفضل تقعد ببيتي.	Aram							MSA
18040	corpus-6-test-corpus-26-train	هذا , من فضلك .	هاظ ، لو سمحت.	هاي، لو سمحت.	Aram	هذا	هاظ					MSA
6552	corpus-6-test-corpus-26-train	من فضلك نظف هذا المعطف .	لو سمحت نظف هاظا الكبوت.	من فضلك نظف هالمعطف.	Aram	المعطف	الكبوت
19064	corpus-6-test-corpus-26-train	شراب الشمام كحلاء ، من فضلك .	عصير الشمام كحلو ، لو سمحت.	عصير الشمام بليز.	Aram	شراب	عصير	حلاء	حلو			MSA
6232	corpus-6-test-corpus-26-dev	أخطط لتعلم الجولف .	بفكر أتعلم جولف.	عم برتب أتعلم الجولف.	Aram	بخطط	بفكر
17786	corpus-6-test-corpus-26-test	كان هذا مكسوراً بالفعل عندما فتحت الطرد .	كان هاذ مكسور فعلاً لما فتحت الطرد.	كان هاد مكسور من قبل ما فتحت البكج.	Aram	بالفعل	فعلاً					MSA
9979	corpus-6-test-corpus-26-train	توقفت ساعتي .	ساعتي وقفت.	وقفت ساعتي.	Aram
15896	corpus-6-test-corpus-26-train	أجل . إنها مشكلة تخلص من الفضلات .	أيوة. هاي مشكلة كب الزبالة.	أيوة. هاي مشكلة التخلص من الزبالة.	Aram	فضلات	زبالة	تخلص	كب			MSA
7470	corpus-6-test-corpus-26-test	هناك محل لبيع الزهور في الطريق .	في محل ورد بالطريق .	فيه دكان بيبيع ورد على الطريق.	Aram
6984	corpus-6-test-corpus-26-test	هل السيدات يقبلن هذا ؟	الستات بقبلن بهاذ؟	بتعتبرو الستات هالشي؟	Aram	السيدات	الستات
897	corpus-6-test-corpus-26-train	هل يمكننا ترك أشياءنا ما عدا الأشياء القيمة في الحافلة ؟	بنقدر نخلي اغراضنا هون، ماعيدا الأشياء الغالية، في الباص؟	ممكن نسيب أغراضنا غير الغراض الثمينة بالباص؟	Aram	حافلة	باص	ما عدا	ماعيدا
8248	corpus-6-test-corpus-26-train	بمقدورك أن ترى واحداً عند " كارينجي هول " .	بامكانك تشوف واحد بقاعة كارنيجي.	ممكن تشوف واحد عند "كارينجي هول".	Aram	بمقدورك	بإمكانك
17649	corpus-6-test-corpus-26-train	آسف جدا ، لكني أود تأجيل الميعاد .	آسف كثير، بس بدي أجل الموعد .	معذرة كتير، بس بدي أخلي الموعد لوقت تاني.	Aram	المعياد	الموعد					MSA
16158	corpus-6-test-corpus-26-train	أجل , يمكننا القيام بخدمتك بداية من السابعة .	اها، منقدر نخدمك من الساعة السابعة.	اها، فينا نخدمك من الساعة السابعة.	Aram	أجل	اها					MSA
4109	corpus-6-test-corpus-26-dev	على أي جانب من ميدان الاتحاد هي ؟	على اي جهة من دوار الاتحاد بتكون؟	على أي جهة من ساحة الاتحاد هي؟	Aram	ميدان	دوار	جانب	جهة
4990	corpus-6-test-corpus-26-train	أريد بعضاً من كريم التنظيف .	بدي شوية كريم تنظيف.	بدي شوية من كريم التنظيف.	Aram	بعضاً	شوي
11131	corpus-6-test-corpus-26-dev	من فضلك لفها كل على حدة .	من فضلك غلفها كل وحدة لحالها .	من فضلك غلفها كل وحدة لحالها .	Aram							MSA
11027	corpus-6-test-corpus-26-test	كود المنطقة هو ثلاثة . ورقم الهاتف هو اثنان ثلاثة أربعة ثلاثة أربعة صفر صفر .	رقم المنطقة ثلاثة. ورقم التلفون اثنين ثلاثة أربعة ثلاثة اربعة صفر صفر.	رقم المنطقة ثلاثة. ورقم التلفون اثنين ثلاثة أربعة ثلاثة اربعة صفر صفر.	Aram							MSA
9651	corpus-6-test-corpus-26-train	كم عدد المرات التي سأغير فيها القطارات للوصول إلى هناك ؟	كم قطار رح اركب عشان أوصل هناك؟	أديش المرات اللي رح أغير فيها القطارات عشان أوصل هناك؟	Aram	أصل	أوصل
8067	corpus-6-test-corpus-26-test	هل تريد تسوية الفاتورة الآن ؟	راح تحاسب عالفاتورة هسا؟	بدك تدفع الحساب هلا؟	Aram
1997	corpus-6-test-corpus-26-train	هل هذه السيارة الأجرة متاحة ؟	هاي التكسي فاضية؟	هاي العربية الأجرة فاضيه؟	Aram	متاحة	فاضية
1312	corpus-6-test-corpus-26-train	هل يمكن أن تدلني على بعض الفنادق الرخيصة والنظيفة ؟	بصير ادلني عبعض الفنادق الرخيصة والنظيفة؟	ممكن تدلني على بعض الفنادق الرخيصة والنضيفة؟	Aram	هل يمكن	بصير	تدلني	ادلني
10976	corpus-6-test-corpus-26-train	أنا مع بعض الأصدقاء .	أنا مع شوية صحاب.	أنا مع شوية صحاب.	Aram							MSA
360	corpus-6-test-corpus-26-train	لشخصين عند الساعة السابعة , الاسم وتاناب .	لشخصين الساعة سبعة. الاسم وتاناب.	لثنين بالساعة السابعة, الاسم وتاناب.	Aram	سابعة	سبعة
10590	corpus-6-test-corpus-26-train	ما هو الإجمالي ؟	شو الإجمالي؟	شو الإجمالي؟	Aram							MSA
2347	corpus-6-test-corpus-26-test	أين يمكنني أن أشتري زلاجات وأحذية ؟	من وين بقدر اشتري زلاجات و أحذية؟	وين بقدر اشتري سكيت وبوت؟	Aram
15295	corpus-6-test-corpus-26-test	ما وجه الاختلاف بين منتجك ومنتج منافسيك ؟	شو الفرق بين منتجك ومنتج الناس اللي بتنافسك؟	شو فرق بين منتجك ومنتج الناس اللي بتنافسك؟	Aram	الاختلاف	الفرق					MSA
18131	corpus-6-test-corpus-26-test	أين تعلم السيد جونز اللغة اليابانية ؟	وين السيد جونز تعلّم اللغة اليابانية؟	وين السيد جونز تعلّم اللغة اليابانية؟	Aram							MSA
3829	corpus-6-test-corpus-26-train	لا يمكنني وضع الأمتعة تحت المقعد . هل لك أن تحتفظ بها لأجلي من فضلك ؟	أنا ما بقدر أحط شنطي تحت المقعد. ممكن تخبيلي ياهم لو سمحت؟	ما فيني احط الحقائب تحت الكرسي . بتقدر تخليها عندك لأجلي لو سمحت ؟	Aram	تحتفظ	تخبي
2878	corpus-6-test-corpus-26-train	هل يمكنك أن تستدعي موظفاً يتحدث اليابانية ؟	ممكن تنادي موظف بحكي بالياباني؟	بتقدر تجيبلي موظف بحكي ياباني؟	Aram	تستدعي	تنادي
4263	corpus-6-test-corpus-26-train	سوف أبلغ الشرطة بذلك .	راح أبلغ الشرطة بهاظ الإشي.	راح أخبر الشرطة عن هيك.	Aram
17027	corpus-6-test-corpus-26-train	عيد ميلادك اقترب .	عيد ميلادك قرب.	عيد ميلادك بات قريب.	Aram	اقترب	قرب					MSA
3928	corpus-6-test-corpus-26-train	تعثر صديقي والتوي كاحله .	صاحبي وقع والتوى كاحله.	سكبل رفيقي ودواه كاحله.	Aram	تعثر	وقع	صديقي	صاحبي
5988	corpus-6-test-corpus-26-train	نعم , أعتقد ذلك .	اه، بتوقع هيك.	أيوه، بظن هيك.	Aram	نعم	اه	أاعتقد	بتوقع
15378	corpus-6-test-corpus-26-train	اتجاه واحد .	اتجاه واحد.	اجاه واحد.	Aram							MSA
12033	corpus-6-test-corpus-26-train	هلاّ جعلت توقيعك هنا والحروف الأولى من اسمك هنا .	هات خلي توقيعك هون وأول حروف اسمك هون.	هات خلي توقيعك هون وأول حروف اسمك هون.	Aram							MSA
11325	corpus-6-test-corpus-26-dev	أين يمكن أن أوقف سيارتي ؟	وين ممكن أقف سيارتي؟	وين ممكن أقف سيارتي؟	Aram							MSA
15133	corpus-6-test-corpus-26-train	سأغلق الآن . شكراً على انتباهكم .	رح أسكر هسا. شكراً على انتباهكو.	رح أقفل هسا. شكراً على انتباهكم.	Aram	أغلق	أسكر					MSA
6602	corpus-6-test-corpus-26-train	اللعنة . اللعنة . اللعنة . اللعنة . لقد كبرت معتاداً على وجهها .	يلعن. يلعن. يلعن. يلعن. أنا تعودت كثيرعلى وجهها.	يلعن . يلعن . يلعن . يلعن . صرت اعتادت على وجهها.	Aram	اللعنة	يلعن
11972	corpus-6-test-corpus-26-train	سنراك في الغد .	رح نشوفك بكرة.	رح نشوفك بكرة.	Aram							MSA
14086	corpus-6-test-corpus-26-train	عندي ثلاثة أطفال .	عندي ثلاث ولاد.	عندي ثلاثة ولاد.	Aram	أطفال	ولاد					MSA
5175	corpus-6-test-corpus-26-train	نعم ، هي ، لأنك تستطيع أن ترى العلم أمام مكتب البريد .	صح، هي . لأنه بتقدر تشوف العلم قدام مكتب البريد.	اه، هيه، لأنك بتقدر تشوف العلم قدام مكتب البريد.	Aram	نعم	صح	أمام	قدام
18834	corpus-6-test-corpus-26-dev	هل تستطيع إنزال أمتعي إلى الردهة غداً صباحاً ؟	ممكن تنزل أغراضي على الردهة بكرة الصبح؟	ممكن تنزل أغراضي على الردهة بكرة الصبح؟	Aram							MSA
551	corpus-6-test-corpus-26-train	أربع ليالي .	أربع ليالي.	أربع ليال.	Aram
18562	corpus-6-test-corpus-26-train	دقيقة فقط ، من فضلك .	ديقة بس، لو سمحت.	ديقة بس، لو سمحت.	Aram							MSA
130	corpus-6-test-corpus-26-train	هل ستواجهني أية صعوبات في الجمارك ؟	راح ألاقي أي صعوبة بالتعامل مع الجمارك؟	حتواجه مشاكل بالجمارك ؟	Aram	أواجه	ألاقي
12246	corpus-6-test-corpus-26-train	هلا أخبرتني كيفية تعديلها من فضلك ؟	ممكن تحكيلي كيف اعدلها لو سمحت؟	ممكن تحكيلي كيف اعدلها لو سمحت؟	Aram							MSA
11064	corpus-6-test-corpus-26-train	حسنا ، لا أعلم بعد لكنني سوف أحاول بالتأكيد .	ماشي، مش عارف لحد الآن بس رح أحاول أكيد.	ماشي، مش عارف لحد الآن بس رح أحاول أكيد.	Aram							MSA
4857	corpus-6-test-corpus-26-train	موعده المقرر هو الثامنة والنصف مساءْ بالتوقيت المحلي .	موعده هو الساعة ثمنية ونص المسا بالتوقيت المحلي.	موعده اللي اتفقنا عليه هو الثامنة والنص مساء بالتوقيت اللوكال.	Aram	ثامنة	ثمنية
3835	corpus-6-test-corpus-26-train	هل يمكن أن تضع حقيبة السفر هذه في صندوق السيارة .	ممكن لو سمحت تحطلي شنة السفر هاي بالطبون ؟	ممكن تحط هاي الشنطة بتاعة السفر بالتنكة؟	Aram	صندوق السيارة	طبون	تضع	تحط
1878	corpus-6-test-corpus-26-train	هذه ليست تفاحة ولكنها خوخة .	هاي مش تفاحة هاي خوخة.	هاي مش تفاحة، هاي خوخة.	Aram	ليست	مش
7867	corpus-6-test-corpus-26-test	إذا كان بالإمكان ، لم أكن لأخلع السنّة .	اذا ممكن، أنا بفضل ما تقلع السن.	لو كان في مجال، ما كنت حأشيل السنة.	Aram	تخلع	تقلع
2156	corpus-6-test-corpus-26-train	علي أن أفحص ذلك مع زوجتي .	لازم أشوف الموضوع مع مرتي.	لازم أشوف هالشي مع مرتي.	Aram	زوجتي	مرتي	أفحص	أشوف
8161	corpus-6-test-corpus-26-train	لا أعتقد أن هذه السكينة نظيفة . أيمكنك أن تُحضر لي واحدة أخرى ؟	أنا ما بظن إنه هاي السكينة نظيفة. بتقدر تجبلي وحدة تانية؟	ما اظن هاي السكينة نظيفة. ممكن تجيبلي وحدة ثانية؟	Aram	أيمكنك	بتقدر
11197	corpus-6-test-corpus-26-train	املأ البنود الآتية في بطاقة التسجيل .	املي البنود اللي جاية على كرت التسجيل.	املي البنود اللي جاية على كرت التسجيل.	Aram							MSA
9034	corpus-6-test-corpus-26-train	ما الذي يمكن أن أراه في هذه الجولة ؟	شو بقدر أشوف بهاي الرحلة؟	شو الي ممكن اشوفه بهالجولة؟	Aram	أرى	أشوف
3323	corpus-6-test-corpus-26-train	هل هذا المتبل حار ؟	هاظ المتبل حار؟	هاد المتبل حار؟	Aram
17841	corpus-6-test-corpus-26-train	هذه كلها مطبوعات .	هاي كلها مطبوعات.	هاي كلها مطبوعات.	Aram							MSA
7395	corpus-6-test-corpus-26-train	هذه هديه لصديق .	هاي هدية لرفيقي.	هاي هدية لصاحبي.	Aram	صديق	رفيق
17615	corpus-6-test-corpus-26-train	أراهن بخمسة دولارات .	براهن بخمس دولارات .	بحط خمسة دولارات مراهنة.	Aram							MSA
2973	corpus-6-test-corpus-26-train	هل توجد أية جولة صباحية ؟	في أي جولات صباحية؟	فيه جولة بالصبح؟	Aram	أية	أي
17339	corpus-6-test-corpus-26-train	سنمكث .	راح نظل.	راح نضل.	Aram	نمكث	نظل					MSA
10565	corpus-6-test-corpus-26-train	هل توجد غرفة استراحة عامة بالقرب من هنا ؟	في غرفة استراحة عامة جنبنا هون؟	في غرفة استراحة عامة جنبنا هون؟	Aram							MSA
13162	corpus-6-test-corpus-26-train	آسف ، لقد تحققت من إدارة الخدمة وإدارة المفقودات ولم أجدها عندهم .	بعتذر، تأكدت من إدارة الخدمة وإدارة المقودات وما لقيتها عندهم.	معذرة، بديت عند إدارة الخدمة وإدارة الضايعات وما لقيتها عندهم.	Aram	تحققت	تأكدت	أجدها	لقيتها			MSA
17645	corpus-6-test-corpus-26-train	هل قلت لي كيف أذهب إلى المتحف ؟	قلتلي كيف بروح على المتحف؟	قلتلي كيف بروح على المتحف؟	Aram							MSA
15051	corpus-6-test-corpus-26-train	لا أريد إنفاق أكثر من عشرين دولاراً .	ما بدي أصرف أكثر من عشرين دولار.	ما بدي أصرف أكثر من عشرين دولار.	Aram	أنفق	أصرف					MSA
4549	corpus-6-test-corpus-26-train	هذا المكان مكتظ بالناسب ، أليس كذلك ؟	هاظ المكان معبى ناس، مش هيك؟	هالمكان مليان بالناس، صح؟	Aram	مكتظ	معبى
19928	corpus-6-test-corpus-26-train	سأحضر المدرسة الصيفية بجامعة هاواي .	رح أداوم بالمدرسة الصيفية بجامعة هاواي.	رح أروح على المدرسة الصيفية بجامعة هاواي.	Aram	أحضر	أداوم					MSA
8349	corpus-6-test-corpus-26-train	من فضلك اعطني تصريحاً سارياً لمدة أسبوع .	لو سمحت أعطيني اذن لمدة أسبوع.	من فضلك اعطيني إذن مفعول لمدة اسبوع.	Aram	تصريح	إذن
19037	corpus-6-test-corpus-26-dev	ما هذا من فضلك ؟	شو هاظ لو سمحت؟	شو هاد لو سمحت؟	Aram							MSA
2707	corpus-6-test-corpus-26-train	سأحتاج إلى بطاقة ائتمان .	راح أحتاج الفيزا .	رح احتاج كرت ائتمان.	Aram					بطاقة ائتمان:فيزا
10354	corpus-6-test-corpus-26-train	إذن دعنا نبطنها من الداخل .	معناته خلينا نحشيها من جوا.	مشي، يلا نخبطها من جوا.	Aram	داخل	جوا	نبطنها	نحشيها
1998	corpus-6-test-corpus-26-train	هل هذه محطة قطار سريع ؟	هاي محطة اكسبريس؟	هاي المحطة للقطار السريع؟	Aram					قطار سريع :اكسبرس
1603	corpus-6-test-corpus-26-dev	من ثمانية إلى اثنى عشر من فضلك .	من ثمانية ل اثنعش لو سمحت.	من تمانية لثنتين عشرة لو سمحت.	Aram	اثني عشر	اثنعش
16007	corpus-6-test-corpus-26-train	أود قياس بذلة السباق الخاصة بي .	بدي اقيس بدلة السباق تبعتي.	بدي اقيس بدلة السباق الخاصة فيي.	Aram	بذلة	بدلة					MSA
7507	corpus-6-test-corpus-26-dev	لقد طلبته منذ وقت طويل .	طلبته من زمان.	طلبته من زمان طويل.	Aram	وقت طويل	زمان
4017	corpus-6-test-corpus-26-train	أين الحمام ؟	وين الحمام؟	وين الحمام؟	Aram	أين	وين
7253	corpus-6-test-corpus-26-train	اليابانيون لا يأخذون إجازات طويلة .	اليبانيين ما بيوخذو عطل طويلة.	اليابانية ما بياخدوا اجازات طويلة.	Aram	إجازات	عطل	يأخذون	بوخذوا
15181	corpus-6-test-corpus-26-train	هاهي .	هيها .	هيها .	Aram	هاهي	هيها					MSA
18632	corpus-6-test-corpus-26-test	أنها مناسبة تماما .	زابطة تماما.	مناسبة تماما.	Aram	مناسبة	زابطة					MSA
18110	corpus-6-test-corpus-26-train	مرحبا . هذه هي الخطوط الجوية المتحدة .	مرحبا . هاي هي الخطوط الجوية المتحدة .	أهلا . هاي هي الخطوط الجوية المتحدة .	Aram							MSA
11709	corpus-6-test-corpus-26-train	أعيش في شقة إيجارها ثمانون ألف ين في الشهر .	بعيش بشقة، الإجارتها ثمانين ألف ين بالشهر.	بعيش بشقة، الإجارتها ثمانين ألف ين بالشهر.	Aram							MSA
5648	corpus-6-test-corpus-26-train	هل هناك أماكن شاغرة بالنسبة لرحلة الخميس ؟	في أماكن فاظية برحلة يوم الخميس؟	فيه مكان فاضي للرحلة الخميس؟	Aram	شاغرة	فاظية
14457	corpus-6-test-corpus-26-train	أعرف نادي قديم لموسيقى الجاز بوسط البلد .	بعرف نادي قديم لموسيقى الجاز بوسط البلد.	بعرف نادي قديم لموسيقى الجاز بوسط البلد.	Aram							MSA
10645	corpus-6-test-corpus-26-train	هل انعطف يساراً ؟	بدي ألف يمين؟	بدي ألف يمين؟	Aram							MSA
10707	corpus-6-test-corpus-26-train	أحبه فعلاً .	بحبه فعلا.	بحبه فعلا.	Aram							MSA
14444	corpus-6-test-corpus-26-train	من فضلك احفظ هذه الحقائب في محتجز الجمارك .	لو سمحت خلي هالشنتات بالجمارك.	من فضلك احفظ هالشناط في مكان الجمرك.	Aram	احفظ	خلي	حقائب	شنتات			MSA
19100	corpus-6-test-corpus-26-train	هل يمكنني استخدام إِشارة ضوئية ؟	ممكن استعمل إشارة ضوئية؟	ممكن استعمل إشارة ضوئية؟	Aram	استخدم	استعمل					MSA
16070	corpus-6-test-corpus-26-train	أعمل في شركة نشر .	بشتغل بشركة نشر.	بشتغل بشركة نشر.	Aram	أعمل	بشتغل					MSA
11457	corpus-6-test-corpus-26-train	اتجه يساراً في هذا الشارع ثم انعطف عند أول منعطف يمين .	روح يمين بهالشارع وبعدين اتوجه يمين عند اول منعطف.	روح يمين بهالشارع وبعدين اتوجه يمين عند اول منعطف.	Aram							MSA
2025	corpus-6-test-corpus-26-train	بالفعل لدي أخبار . أنا سأتزوج .	فعلياً، عندي أخبار. أنا بدي أجوز.	حقا عندي اخبار. رح اتجوز.	Aram	بالفعل	فعلياً	أتزوج	أجوز
315	corpus-6-test-corpus-26-train	واحد هامبرجر وواحد شيز برجر ، من فضلك .	واحد همبرقر وواحد شيز برقر، لو سمحت.	واحد همبرغر وواحد شيز برغر، لو سمحت.	Aram	برجر	برقر
7996	corpus-6-test-corpus-26-test	أوه ، آسف . كانت هناك مشاكل ونحن نقوم بحلها ، هل تتفضل بالانتظار لمدة ثلاثين دقيقة ؟	أووه، أنا آسف. كان في مشاكل منحلها. ممكن تستنى لثلاثين دقيقة؟	يا عيني، اسفين. كان معنا مشاكل واحنا عم نحكم فيها، بتقدر تستنى ربع ساعه؟	Aram
5082	corpus-6-test-corpus-26-train	كم عددها ؟	كم عددها ؟	أديش عددها؟	Aram
14757	corpus-6-test-corpus-26-train	و هو كذلك . سأوصلك إلى هناك .	و هو هيك . رح اوصلك لهناك.	و هيك هو . رح اوصلك لهنيك.	Aram	كذلك	هيك					MSA
15019	corpus-6-test-corpus-26-train	أريد فندق أرخص قليلاً .	بدي فندق أرخص شوي.	بدي فندق أرخص شوي.	Aram							MSA
19715	corpus-6-test-corpus-26-train	الأجدر بك أن تكف عن ذلك .	أحسنلك تبطل هالاشي.	أحسنلك تبطل هالحكي.	Aram	تكف	تبطل	أجدر	أحسن			MSA
14261	corpus-6-test-corpus-26-train	هل أي من المتاجر الكبيرة به يعمل الآن ؟	في أي مول فاتحة هسه؟	في أي من التوكالات الكبارا فاتحة هسه؟	Aram	يعمل	فاتح			متجر كبير : مول		MSA
777	corpus-6-test-corpus-26-train	كم تستغرق حتى تصبح متاحة .	قديش بدها حتى تصير فاظية .	ادّيش بتأخد لحد ما تصير متوفرة.	Aram	تصبح	تصير	متاحة	فاظية
14045	corpus-6-test-corpus-26-train	معذرة . أريد أن أطلب طلب .	معلش . بدي أطلب طلب .	معليش . بدي أطلب طلب .	Aram	معذرة	معلش					MSA
9308	corpus-6-test-corpus-26-train	عندنا حفلة مساء الجمعة . لماذا لا تنضم لنا ؟	عنا حفلة يوم الجمعة بالليل. ليش ما تيجي معنا؟	عنا حفلة مساء الجمعة. ليش ما بتواتي معنا؟	Aram	تنضم	تيجي
5640	corpus-6-test-corpus-26-test	كيف أستقلها ؟	كيف اركبهاا؟	شلون بركبها؟	Aram	أستقلها	اركبها
14089	corpus-6-test-corpus-26-dev	هل هي جولة يوم كامل ؟	هي الرحلة ليوم كامل؟	هاي الجولة طول اليوم؟	Aram	جولة	رحلة					MSA
8039	corpus-6-test-corpus-26-train	في أي وقت يمكنني مغادرة الفندق ؟	بأي ساعة ممكن أعمل خروج من الفندق؟	إمتى بقدر أطلع من الفندق؟	Aram
2445	corpus-6-test-corpus-26-train	أحضر لي بعض من الجبن المبشور .	هاتلي شوي من الجبنة المبروشة.	جيبلي شوية جبنة مبروشة.	Aram	مبشور	مبروش	أحضر	هات
129	corpus-6-test-corpus-26-train	هل لديك أحذية حريمي عند أصابع القدم ؟	عندك كنادر ستاتي مفتوحة من عند الأصابع؟	عندك جزم حريمي عند إصابع الرجل؟	Aram	حريمي	ستاتي	احذية	كنادر
3170	corpus-6-test-corpus-26-test	هذه كبيرة جداً .	هاي كثير كبيرة.	هاي كبيرة كتير	Aram
6100	corpus-6-test-corpus-26-test	نبيذ غير حلو ، من فضلك .	واين بدون سكر، لو سمحت.	عنبية مو حلوة، لو سمحت.	Aram	غير حلو	بدون سكر
3887	corpus-6-test-corpus-26-test	تبلغ الميزانية أقل من ألف دولار .	الميزانية أقل من ألف دولار.	الميزانية بتوصل أقل من ألف دولار.	Aram
13423	corpus-6-test-corpus-26-dev	إنها معطلة . هل تستطع فحص آلة التصوير هذه ؟	هاي معطلة. بتقدر تشيّك على آلة التصوير هاي؟	هاي مش شغالة. بتقدر تشيّك على هالة آلة تصوير؟	Aram	تستطيع	بتقدر	تفحص	تشيك			MSA
1637	corpus-6-test-corpus-26-train	لقد كان هناك حادث مرور .	كان في حادث سير.	صار عنا حادث سير.	Aram	مرور	سير
8610	corpus-6-test-corpus-26-train	إجمالي سكان اليابان حوالي مائة وثلاثين مليوناً .	العدد الكلي لسكان اليابان حوالي مية وثلاثين مليون.	مجموع الناس اللي في اليابان حوالي مية وتلاتين مليون.	Aram	إجمالي	كلي
169	corpus-6-test-corpus-26-train	أي نوع من الملابس ؟	أي نوع من الأواعي ؟	شو نوع الهدوم؟	Aram	ملابس	أواعي
6593	corpus-6-test-corpus-26-train	في أي مجال كان من قبل ؟	بأي مجال هو كان قبل؟	بأي مجال كان قبل هيك؟	Aram
18612	corpus-6-test-corpus-26-dev	كم تتكلف الليموزين للذهاب إلى وسط المدينة ؟	قديش تكلف الليموزين عشان نروح عوسط البلد؟	أديش تكلف الليموزين عشان نروح عالدوار الكبير؟	Aram	مدينة	بلد					MSA
15259	corpus-6-test-corpus-26-train	الاسم هو جورو موتوياما . والرقم هو صفر ثلاثة ثلاثة اثنان ستة واحد اثنان أربعة تسعة خمسة .	الاسم هو جورو موتوياما . والرقم هو صفر ثلاثة ثلاثة اثنان ستة واحد اثنان أربعة تسعة خمسة .	الاسم هو جورو موتوياما. والرقم هو صفر تلاتة تلاتة اتنين ستة واحد اتنين أربعة تسعة خمسة.	Aram							MSA
11975	corpus-6-test-corpus-26-train	لا ، ولكن شكراً لك . إنني أشعر بتحسن .	لا، بس شكرًا هونيك. أنا حاسس انو صرت أحسن.	لا، بس شكرًا هونيك. أنا حاسس انو صرت أحسن.	Aram							MSA
15443	corpus-6-test-corpus-26-train	هل لك أن نبدل مقاعدنا من فضلك ؟	ممكن نبدل كراسينا لو سمحت؟	ممكن نتبدل المقاعد لو سمحت؟	Aram	مقاعدنا	كراسينا					MSA
8535	corpus-6-test-corpus-26-train	هل هناك مكان يتم فيه عزف الموسيقي الريفية ؟	ما في أي مكان بعزف ألحان ريفية؟	في مكان بيعزفوا فيه الموسيقى الريفية؟	Aram	موسيقى	لحن
13096	corpus-6-test-corpus-26-train	هلا أخبرتني قبل أن نصل إلى درهام ؟	بصير تخبرني قبل ما نوصل لـ درهام؟	كان فيك تخبرني قبل ما نوصل لـ درهام؟	Aram	نصل	نوصل	هلا	بصير			MSA
16091	corpus-6-test-corpus-26-train	ظل سائراً عبر هذا الممر , وستجدها على الجانب الأيمن .	ظل ماشي بالممر هاذ , و رح تلاقيها عالجهة اليمين.	استمر يا زلمة عم تمشي بالممر هاد , و رح تلاقيها عالجهة اليمين.	Aram	أيمن	يمين	سائر	ماشي			MSA
19144	corpus-6-test-corpus-26-train	أشعر بصداع .	بحس بصداع.	عم بحس بوجع براسي.	Aram	أشعر	بحس					MSA
5615	corpus-6-test-corpus-26-train	عامل الصيانة سيصعد في الحال .	عامل الصيانة راح يطلع مباشرة.	الصنايعي رح يطلع هسا.	Aram	في الحال	مباشرة	يصعد	يطلع
19578	corpus-6-test-corpus-26-train	هل تمانع في جلوسي هنا ؟	بتمانع لو اقعد هون؟	بتمانع لو اجلس هون؟	Aram	جلس	قعد					MSA
7030	corpus-6-test-corpus-26-train	لقد قمت بزيارة البحيرات الكبرى لأول مرة .	هاي أول مرة بزور البحيرات الكبرى.	سيرت على البحيرات الكبرى لأول مرة.	Aram
9949	corpus-6-test-corpus-26-train	أصبت بالتهاب في الحلق .	التهب حلقي .	صرت معي التهاب بالحلق.	Aram
1927	corpus-6-test-corpus-26-train	نسافر جواً ثلاث مرات في الأسبوع ، أيام الثلاثاء والجمعة والسبت .	بنسافر بالطيارة ثلث مرات بالأسبوع، الثلاثاء، الجمعة والسبت.	بنطير بالطيارة تلات مرات بالأسبوع، الثلاثة والجمعة والسبت.	Aram	جواً	بالطيارة
18264	corpus-6-test-corpus-26-train	نعم . أيقظني من النوم بعد ثلاثة ساعات , من فضلك .	أيوة . صحيني من النوم بعد ثلاث ساعات, لو سمحت.	أيوة . صحيني من النوم بعد ثلاث ساعات, لو سمحت.	Aram	أيقظني	صحيني					MSA
10111	corpus-6-test-corpus-26-train	إلى أين يجب علي أن أنقل ؟	لوين لازم أحول؟	وين لازم انقل؟	Aram	أنقل	أحول
7227	corpus-6-test-corpus-26-test	لا أعرف كثيراً عن النبيذ ؟ ماذا يناسب هذا الطبق ؟	أنا ما بعرف كثير بالواين. شو بنفع مع هاذ الأكل؟	ما بعرف كتير عن النبيذ، ايش بيلائم هالطبق؟	Aram	طبق	أكل	يناسب	بنفع
15170	corpus-6-test-corpus-26-train	وللشرب ؟ .	بتشرب إشي ؟ .	بتشرب إشي ؟ .	Aram							MSA
17115	corpus-6-test-corpus-26-train	نعم ، هذا لا يشمل الوجبات .	أيوة، هاذ ما بشمل الأكل.	أيوة، هاي ما بتشمل الأكل.	Aram	وجبات	أكل					MSA
5090	corpus-6-test-corpus-26-dev	قمة جبل " فوجي " هي اعلي قمة جبلية في اليابان حيث يبلغ ارتفاعها ثلاثة آلاف وسبعمائة وستون مترا .	جبل فوجي هو أعلى قمة باليابان على ارتفاع ثلاثة ألاف وسبعمية وستين متر.	راس جبل "فوجي" هو اعلى راس جبال في اليابان، ارتفاعو ثلاثة آلاف وسبعميه وستين متر.	Aram
11278	corpus-6-test-corpus-26-test	هل يمكن أن ترسل أحدا ؟	ممكن تبعت حدا؟	ممكن تبعت حدا؟	Aram							MSA
4714	corpus-6-test-corpus-26-train	هل من الممكن أن تفصل أكثر ؟	يتقدر توضح أكثر ؟	ممكن توضح أكثر؟	Aram	تفصل	توضح
16061	corpus-6-test-corpus-26-train	أريد واحدة حديثة .	بدي وحدة جديدة.	بدي وحدة جديدة.	Aram	حديثة	جديدة	واحدة	وحدة			MSA
8811	corpus-6-test-corpus-26-train	حسنا ، ولكن ليس منطقة المقاعد المكشوفة . فاليوم شديد الحرارة .	طيب ، بس مش على مكان الكراسي المكشوفة. اليوم كثير شوب.	منيح، بس مش المنطقة اللي ما فيها ظل. اليوم جوه صيفي شديد.	Aram	منطقة	مكان	شديد الحرارة	شوب
7708	corpus-6-test-corpus-26-train	سأرسلها لك ، لذا من فضلك انتظر هنا .	راح أبعثها الك، عشان هيك استنى هون لو سمحت.	رح أبعتها الك ، فضلًا اصبر هون.	Aram	لذا	عشان	انتظر	استنى
2531	corpus-6-test-corpus-26-train	أخشى أن يكون هناك خطأ في الفاتورة .	خايف يكون في غلط بالفاتورة.	بخاف انه في غلط بالفاتورة.	Aram	أخشى	خايف
170	corpus-6-test-corpus-26-train	هذا بارد إلى حد ما . هل يمكن أن تقوم بتسخينه ؟	هاظا بارد شوي. ممكن تسخنه؟	هاذ الشي بارد شوي. ممكن تدفيه؟	Aram	غلى حد ما	شوي
13784	corpus-6-test-corpus-26-train	هلا راقبت حقيبتي من فضلك ؟	ممكن تراقبلي شنتي ، لو سمحت؟	ممكن تراقبلي شنطتي، لو سمحت؟	Aram							MSA
4615	corpus-6-test-corpus-26-test	لا امتلك أي نقود .	ما معي مصاري.	ما عندي فلوس.	Aram	أمتلك	معي
12298	corpus-6-test-corpus-26-train	أريد عامل تشغيل يتحدث اليابانية من فضلك .	بدي شغيل بيحكي ياباني لو سمحت.	بدي شغيل بيحكي ياباني لو سمحت.	Aram							MSA
2747	corpus-6-test-corpus-26-train	يبدو أنها نادرة جداً .	شكلها نادرة كثير.	بتبين إنها شوي شوي.	Aram	يبدو	شكلها
9945	corpus-6-test-corpus-26-train	إنني على يقين أن المجرم قريب .	أنا متأكد إنه المجرم قريب.	أنا متأكد إنو الجاني قريب.	Aram
12658	corpus-6-test-corpus-26-dev	أجل ، أظن أني سوف أنظر .	ايوا، بظن إني رح اطلع.	ايوا، بظن إني رح اطلع.	Aram							MSA
3861	corpus-6-test-corpus-26-train	هل يوجد أحد يستطيع العزف على البيانو ؟	في أي حدا بعرف يعزف عالبيانو؟	في حدا قادر يعزف على البيانو ؟	Aram	يوجد	في	أحد	حا
8250	corpus-6-test-corpus-26-train	لستُ معتمداً قانونياً .	أنا مش مؤهل.	مش معتمد قانونيا.	Aram	معتمد	مؤهل
14564	corpus-6-test-corpus-26-dev	هل يمكنك أن توصل أمتعتي إلى الغرفة ؟	ممكن توصل اغراضي للغرفة؟	ممكن توصل زادي للغرفة؟	Aram	أمتعتي	اغراضي					MSA
15319	corpus-6-test-corpus-26-train	هل الشوارع الخلفية خطر ؟	الشوارع الخلفية خطرة ؟	بتكون الشوارع الخلفية خطر ؟	Aram							MSA
3385	corpus-6-test-corpus-26-train	هل لك أن توقظني في تمام السادسة من فضلك ؟	بتقدر تصحيني الساعة ستة، لو سمحت؟	ممكن تصحيني عالسادسة إذا سمحت؟	Aram	توقظني	تصحيني
7948	corpus-6-test-corpus-26-train	أشعر بحالة سيئة وغثيان .	حاس بلعية ووظعي زفت.	بحس حالي تعيس وعم بمغصني.	Aram	غثيان	لعية	سيء	زفت
13733	corpus-6-test-corpus-26-train	لقد اتصلت منذ ثلاثة أيام بخصوص حقيبة ضائعة .	اتصلت من ثلاث أيام عشان شنتة ظايعة.	اتصلت من تلاتة أيام على شان شنطة ضايعة.	Aram	ضائعة	ظايعة	حقيبة	شنتة			MSA
16899	corpus-6-test-corpus-26-dev	بضع دقائق أخرى من فضلك .	كم دقيقة كمان اذا سمحت.	شوي تاني اذا سمحت.	Aram	أخرى	كمان					MSA
1224	corpus-6-test-corpus-26-train	لم أدرك الرحلة رقم عشرون المتجهة إلى سان فرانسيسكو .	ما لحقت الرحلة رقم عشرين اللي رايحة عسان فرانسيسكو.	ما قدرت أوصل على الرحلة رقم عشرين إلي بتمشي على سان فرانسيسكو.	Aram	أدرك	لحقت	متجهة	رايحة
16911	corpus-6-test-corpus-26-train	آه ، عندك ؟ بالتأكيد إن لديك تشكيلة كبيرة .	أها، عندك؟ طبعا إنت عندك تشكيلة كبيرة.	أها، عندك؟ طبعا إنت عندك مجموعة كبيرة.	Aram	بالتأكيد	طبعاً					MSA
8918	corpus-6-test-corpus-26-train	بطريقة أبطأ ، من فضلك .	بشكل أبطأ ، لو سمحت.	بشكل أبطأ، لو سمحت .	Aram
11643	corpus-6-test-corpus-26-train	إنه لا يلائمني .	مش مناسبني.	مش مناسبني.	Aram							MSA
14306	corpus-6-test-corpus-26-train	هل من الممكن إجراء اتصال على أن يتم تحصيل أجرته من الطرف الآخر ؟	ممكن أعمل مكالمة وتوخذوا حقها من الطرف الثاني؟	ممكن أعمل مكالمة ويدفع الثمن الشخص الثاني؟	Aram	ثمنها	حقها	الآخر	الثاني			MSA
741	corpus-6-test-corpus-26-dev	عندك أية شيء يمكن أن أتعاطه للطفح الجلدي ؟	عندك أي اشي ممكن آخذه عشان هاذ الطفح الجلدي؟	عندك إشي ممكن أخذه للطفح الجلد؟	Aram	أية	أي	أتعاطه	آخذه
15036	corpus-6-test-corpus-26-dev	هل تفضلت و احتسيت القهوة معي ؟	تتفضل و تشرب قهوة معي؟	بتتشرف و بتشرب قهوة معي؟	Aram	تحتسي	تشرب					MSA
3284	corpus-6-test-corpus-26-train	سأقوم بتسجيل الدخول في تمام الساعة الثامنة مساءاً تقريباً .	راح أنزل بالفندق حوالي الساعة ثمنية المسا .	راح اعمل لوگن حوالي الساعة 8 بالليل.	Aram	اسجل دخول	أنزل
12810	corpus-6-test-corpus-26-train	إننا على ارتفاع اثني عشر ألف قدم .	احنا على ارتفاع اتناشر ألف قدم.	احنا على ارتفاع اتناشر ألف قدم.	Aram							MSA
4653	corpus-6-test-corpus-26-train	لقد تمتعت بإقامتي . شكراً لك .	انبسطت بإقامتي . شكراً الك.	فعلا استنسحت وقتي هون. شكرا الك.	Aram	تمتعت	انبسطت
1165	corpus-6-test-corpus-26-train	أُفضلُ حجرة هادئة .	بفظل غرفة هادية.	بفضل غرفة هادية.	Aram	هادئة	هادية	أفضل	بفظل
16546	corpus-6-test-corpus-26-train	كان يجب تدبير وسيلة مواصلات . ذاهبة إلى بوسطن .	لازم ندبر طريقة أو سيارة رايحة على بوسطن.	لازم نشتغل على سيارة أو طريقة عشان نروح على بوسطن.	Aram	ذاهبة	رايحة	يجب	لازم			MSA
10937	corpus-6-test-corpus-26-dev	لقد سرق مسجل الفيديو من غرفتي .	سرقو مسجل الفيديو من غرفتي.	سرقو مسجل الفيديو من غرفتي.	Aram							MSA
17315	corpus-6-test-corpus-26-train	هذا هو طبقنا المميز , سمك موسى المشوي الخاص بدوفر .	هاذ طبقنا الخاص, سمك موسى المشوي الخاص بدوفر.	هاي هيا صينيتنا الخاصة, سمك موسى المشوي اللي بدوفر.	Aram	المميز	الخاص					MSA
11403	corpus-6-test-corpus-26-train	هل يمكن أن أختر جريدة يابانية , من فضلك ؟	ممكن اختار جريدة يابانية، لو سمحت؟	ممكن اختار جريدة يابانية، لو سمحت؟	Aram							MSA
11714	corpus-6-test-corpus-26-train	هل لي أن أقاطعكم ؟	ممكن أقاطعكم؟	ممكن أقاطعكم؟	Aram							MSA
13399	corpus-6-test-corpus-26-train	هل يوجد بالقرب من هنا مطعم صيني ؟	في مطعم صيني قريب من هون؟	في مطعم صيني قريب من هون؟	Aram	هنا	هون					MSA
8833	corpus-6-test-corpus-26-train	لا أريد أي شيء يكون كبير الحجم .	ما بدي أي اشي ظخم.	ما بدي أي اشي كبير الحجم.	Aram
14807	corpus-6-test-corpus-26-train	هل أنت الأخير في هذا الصف ؟	إنت الأخير بهاذ الصف؟	هل انت الأخر بالصف هاي؟	Aram							MSA
11689	corpus-6-test-corpus-26-train	إن محفظتي نشلت في القطار .	وحدة سرق محفظتي في القطر.	وحدة سرق محفظتي في القطر.	Aram							MSA
