# Supplementary material for: Exploring prompting for dialectical machine translation: a focus on north Jordanian Arabic
Source: PeerJ journal article supplement (doi:10.7717/peerj-cs.3209), 2025-11-12
Supplement: Code.zip [file Madar_Corpus_26_test_with_translations.xlsx]

## Sheet: Sheet1
sentID.BTEC	split	MSA	IrbidDial	GPT	Translator	word 1	meaning 1	word 2	meaning 2	Foreign words	Has idioms	lang
4409	corpus-6-test-corpus-26-train	ما رأيك في مشاهدة فيلم آخر ؟	شو رأيك نشوف فيلم ثاني؟	ماذا برأيك نذهب لمشاهدة فيلم آخر؟	Aram	آخر	ثاني
5733	corpus-6-test-corpus-26-dev	أريد كوبا من الماء لأتناول بعض الدواء , من فضلك .	بدي كاسة مي عشان اوخذ الدوا، لو سمحت.	أريد كوب ماء لأخذ الدواء، من فضلك.	Aram	كوب	كاسة	ماء	مي
9792	corpus-6-test-corpus-26-train	أبغي كرة .	بدي طابة.	أريد كرة.	Aram	أبغي	بدي
10372	corpus-6-test-corpus-26-train	كيف تحب أن يصفف شعرك اليوم ؟	كيف بدك يسرحلك شعرك اليوم؟	كيف تريد أن يصفف لك شعرك اليوم؟	Aram	يصفف	يسرح	تحب	بدك
5004	corpus-6-test-corpus-26-train	أريد رداءا ذات أكمام طويلة .	بدي جاكيت كم طويل.	أريد رداء ذو كم طويل.	Aram	رداء	جاكيت
6190	corpus-6-test-corpus-26-train	ها-ها . صباح الخير حان دورك . إنه على ما يرام .	هههه. صباح الخير صار دورك. هو كويس.	هههه. صباح الخير، حان دورك. هو جيد.	Aram	حان	صار	على ما يرام	كويس
17217	corpus-6-test-corpus-26-train	أين نتقابل ؟	وين بدنا نتلاقى؟	أين نريد أن نلتقي؟	Aram	نتقابل	نتلاقى					MSA
12035	corpus-6-test-corpus-26-train	لقد أثلج صدري زيارة مقاركم الرئيسية وكذا ما جرى بيننا من مناقشات مهمة . شكراً جزيلاً على ما أبديتموه من تعاون .	فرحت كتير لما زرت مكاتبكم الرئيسية وكمان النقاشات الهمة اللي صارت بيناتنا. كتير شكراً على العون اللي قدمتوه.	فرحت كثيراً حين زرت مكاتبكم الرئيسية وكذلك النقاشات المهمة التي حدثت بيننا. شكراً جزيلاً على المساعدة التي قدمتموها.	Aram							MSA
17966	corpus-6-test-corpus-26-dev	هل هذا قطار مباشر ؟	هاذ القطار مباشر؟	هل هذا القطار مباشر؟	Aram							MSA
8688	corpus-6-test-corpus-26-dev	إبريق من القهوة ، لطفاً .	بكرج قهوة، لو سمحت.	أريد إبريق قهوة، من فضلك.	Aram	إبريق	بكرج
26	corpus-6-test-corpus-26-train	كم تكلفة الإفطار ؟	بقديش الفطور ؟	كم سعر الفطور ؟	Aram	كم تكلفة	قديش
13287	corpus-6-test-corpus-26-train	من فضلك اختر لي مائدة ذات منظر ليلي لطيف .	من فظلك إختارلي طاولة مع منظر حلو بالليل.	من فضلك اختر لي منضدة مع منظر جميل في الليل.	Aram	اختر	إختار					MSA
12701	corpus-6-test-corpus-26-train	أين الحلاق ؟	وين الحلاق؟	أين الحلاق؟	Aram							MSA
4654	corpus-6-test-corpus-26-train	الشاطئ أسفل يمينا . ياله من منظر رائع .	الشط تحت على اليمين. شو المنظر بجنن.	الشاطئ أسفل على اليمين. ماذا عن المنظر؟ إنه رائع.	Aram	رائع	بجنن	أسفل	تحت
3201	corpus-6-test-corpus-26-dev	كلاً ، إنهم متينين جداً .	لا، هظول كثير قويات.	لا، هؤلاء أقوياء جداً.	Aram	إنهم	هظول	متين	قوي
30	corpus-6-test-corpus-26-train	اتجه يسارا عند الناصية الثالثة .	روح يسار من عند الدخلة الثالثة .	اذهب يساراً عند الناصية الثالثة .	Aram	اتجه	روح	ناصية	دخلة
2236	corpus-6-test-corpus-26-train	أين المحطة النهائية للحافلة ؟	وين اخر موقف للباص؟	أين آخر موقف للحافلة؟	Aram	محطة	موقف
14108	corpus-6-test-corpus-26-train	كم يتقاضى المرشد في اليوم ؟	قديش بيوخذ الدليل باليوم؟	كم يأخذ الدليل في اليوم؟	Aram	مرشد	دليل					MSA
5437	corpus-6-test-corpus-26-train	أريد كيساً من الفشار ، من فضلك .	بدي كيس بوشار، لو سمحت.	أريد كيساً من الفشار، من فضلك.	Aram	فشار	بوشار
2329	corpus-6-test-corpus-26-train	من فضلك غير خمسين آلاف ين إلى دولارات أمريكية .	لو سمحت اصرف الخمسين ألف ين لدولر أمريكي.	من فضلك، بدّل الخمسين ألف ين إلى دولار أمريكي.	Aram	غير	اصرف
346	corpus-6-test-corpus-26-train	أريد قاموس جيب ، من فضلك .	بدي قاموس بنحط بالجيبة ، لو سمحت.	أريد قاموساً يوضع في الجيبة، من فضلك.	Aram	جيب	جيبة	يوضع	بنحط
5407	corpus-6-test-corpus-26-train	من فضلك ، أريد فنجاناً من القهوة البيضاء .	لو سمحت ، بدي فنجان قهوة بالحليب.	من فضلك، أريد قدح قهوة بالحليب.	Aram	من فضلك	لو سمحت
2462	corpus-6-test-corpus-26-train	هل يمكن أن أحصل على قمصاني نظيفة غداً صباحاً ؟	ممكن ألاقي قمصاني نظيفات بكرا الصبح؟	هل يمكنني أن أجد قمصاني نظيفة غداً صباحاً؟	Aram	أحصل	ألاقي	غداً	بكرا
9312	corpus-6-test-corpus-26-train	حسنا , حجرتك يا آنسة هي رقم تسعة صفر ثمانية . هذا مفتاحك .	طيب، غرفتك يا آنسة هي تسعة صفر ثمنية. هاذ مفتاحك.	حسناً، حجرتك يا أستاذة هي تسعة صفر ثمانية. هذا مفتاحك.	Aram	حجرتك	غرفتك
11746	corpus-6-test-corpus-26-train	نعم ، بالطبع .	أيوا، أكيد.	نعم، بالتأكيد.	Aram							MSA
14721	corpus-6-test-corpus-26-train	ما تكلفة المقاعد الخاصة بالشرفة ؟	قديش بتكلف الكراسي تبعت البرندة؟	كم تكلفة الكراسي الخاصة بالبرندة؟	Aram	شرفة	برندة	الخاصة	تبعت			MSA
18877	corpus-6-test-corpus-26-train	هل لي بدليل سياحي ؟	ممكن مرشد سياحي؟	هل يمكنني الحصول على مرشد سياحي؟	Aram	هل لي	ممكن					MSA
8625	corpus-6-test-corpus-26-train	أجل ، وأودّ محاسبة المطلوب هاتفياً على قيمة المكالمة .	صح، وأنا بدي احاسب يلي رنيت عليه على حق المكالمة.	نعم، وأرغب في دفع ثمن المكالمة للشخص الذي اتصلت عليه.	Aram	قيمة	حق
14478	corpus-6-test-corpus-26-dev	جلد التمساح الأمريكي .	جلد التمساح الأمريكي.	جلد التمساح الأمريكي.	Aram							MSA
16736	corpus-6-test-corpus-26-train	سأكون هنا الساعة الثامنة إلى الربع .	رح أكون هون الساعة ثمانية إلا ربع.	سأكون هنا في الساعة الثامنة إلا ربع.	Aram							MSA
19703	corpus-6-test-corpus-26-train	أظن أن الملابس المصنوعة في اليابان قد جرى تفصيلها على نحو أفضل بالتأكيد .	بتوقع انو الأواعي اللي صنعت في اليابان تفصلت بطريقة أحسن أكيد.	أظن أن الملابس التي صنعت في اليابان تم تفصيلها بطريقة أفضل بالتأكيد.	Aram	ملابس	أواعي	نحو	طريقة			MSA
6740	corpus-6-test-corpus-26-dev	سأكون هناك حوالي السادسة مساءً .	راح أكون هناك حوالي الساعة ستة المسا.	سوف أكون هناك حوالي الوقت السادسة مساءً.	Aram	سادسة	ستة
12611	corpus-6-test-corpus-26-dev	لا أجيد الإنجليزية . هل ثمة من يتحدث اليابانية هنا ؟	أنا مش بعرف أحكي إنجليزي. في حدا بحكي ياباني هون؟	أنا لست أعلم كيف أتحدث الإنجليزية. هل هناك شخص ما يتحدث اليابانية هنا؟	Aram							MSA
3155	corpus-6-test-corpus-26-train	إنني أتصل من كشك عمومي في ماسي .	أنا بحكي معك من كشك عام بماسي.	أنا أتحدث معك منذ كشك عمومي بماسي.	Aram	عمومي	عام
7098	corpus-6-test-corpus-26-train	كم الوقت ؟	قديش الساعة؟	كم الساعة؟	Aram	كم	قديش
15221	corpus-6-test-corpus-26-train	إنني أبحث عن هذا .	أني بدور على هاظ.	إنني أبحث عن هذا.	Aram	أبحث	بدور					MSA
4305	corpus-6-test-corpus-26-train	لماذا لا تعطيها هدية ؟	ليش ما تعطيها هدية؟	لماذا لا تعطيها هدية؟	Aram	لماذا	ليش
6006	corpus-6-test-corpus-26-train	استمتعنا بالعشاء .	كيفنا عالعشا.	استمتعنا بالعشاء.	Aram	استمتعنا	كيفنا
19654	corpus-6-test-corpus-26-train	سأذهب بك على مقعدك . من هنا ، من فضلك .	راح اوديك على كرسيك. من هون، لو سمحت.	سوف آخذك إلى كرسيك. من هنا، من فضلك.	Aram							MSA
6411	corpus-6-test-corpus-26-train	سأعود إليك عندما تكون أقل انشغالاً .	راح أرجعلك بس تكون مش مشغول كثير.	سوف أعود إليك عندما تكون غير مشغول كثيراً.	Aram	أعود	أرجع
12101	corpus-6-test-corpus-26-train	أنا السيد تكاهاشي بالغرفة رقم خمسة تسعة وأربعين . من فضلك أرسل أربع زجاجات من بيرة بودفايزر .	أنا الأستاذ تكاهاشي بالأوضة رقم ٥٩ . لو سمحت بدي أربع بطولين من البيرة بودفايزر.	أنا الأستاذ تكاهاشي في الغرفة رقم ٥٩ . من فضلك أريد أربع زجاجات من البيرة بودفايزر.	Aram							MSA
10930	corpus-6-test-corpus-26-train	حسنا ، إنه وقت الغداء . هل تحب أن نناقشه على الغداء ؟	ماشي، وقت الاكل صار. بتحب نحكي عنها واحنا ناكل؟	حسناً، لقد حان موعد الطعام. هل تحب أن نناقشها أثناء تناول الطعام؟	Aram							MSA
2324	corpus-6-test-corpus-26-train	هناك الكثير من الينابيع الحارة .	في كثير ينابيع حارة.	توجد العديد من الينابيع الحارة.	Aram	هناك	في
11595	corpus-6-test-corpus-26-train	سر مباشرة ، من فضلك .	روح ع طول، لو سمحت.	اذهب مباشرة، من فضلك.	Aram							MSA
13719	corpus-6-test-corpus-26-train	هل تمانع إذا التقطت صورة لك ولسيارتك الأجرة ؟	بتمانع لو أخذت صورة إلك وللتكسي تبعتك؟	هل تمانع إذا تناولت صورة لك ولسيارة الأجرة الخاصة بك؟	Aram	التقطت	أخذت			سيارة أجرة : تكسي		MSA
13532	corpus-6-test-corpus-26-dev	كم من الوقت نحتاج للذهاب مشياً من هنا إلى مبنى البلدية ؟	قديش بدنا وقت عشان نمشي من هون لبناية البلدية؟	كم نحتاج من وقت لكي نذهب من هنا إلى مبنى البلدية؟	Aram	مبنى	بناية					MSA
565	corpus-6-test-corpus-26-train	هل تستطيع أن تخفض سعرها لوجود بعض البقع بها ؟	بتقدر ترخصها لأنه في عليها شوية بقع؟	هل يمكنك تخفيض سعرها لأنه يوجد عليها بعض البقع؟	Aram	تخفض سعرها	ترخصها
177	corpus-6-test-corpus-26-test	شكراً ، هذا يكفي .	شكراً ، هاظ بكفي.	شكراً ، هذا يكفي.	Aram	هذا	هاظ
1418	corpus-6-test-corpus-26-train	أريد الشخص الذي يعد وثائق عادية في حجم ورقة الخطاب بدون الحاجة إلى طيهم .	بدي الشخص اللي بعمل الوثائق اللي بحجم الورق العادي بدون ما يظطر يثنيهم.	أرغب في الشخص الذي يعد الوثائق بحجم الورق العادي من غير أن يحتاج لثنيها.	Aram	يعد	بعمل	يحتاج	يظطر
5323	corpus-6-test-corpus-26-train	هل نحتاج إلى طرح هذا للتصويت ؟ إن لم نكن في حاجة إلى هذا ، فإمكاني أن أعتقد حينئذ أننا قد وصلنا إلى نتيجة , سأقوم بإرسالها إلى مجلس إدارتنا صباح غد .	هل احنا محتاجين نحط هاظ للتصويت؟ اذا لأ، بتوقع أنه وصلنا للنتيجة، بدي أبعثها لمجلس ادارتنا بكرا الصبح.	هل نحن بحاجة إلى طرح هذا للتصويت؟ إذا لم يكن الأمر كذلك، أظن أننا وصلنا إلى النتيجة، أريد أن أرسلها إلى مجلس إدارتنا غداً صباحاً.	Aram	نطرح	نحط
