# Supplementary material for: Exploring prompting for dialectical machine translation: a focus on north Jordanian Arabic
Source: PeerJ journal article supplement (doi:10.7717/peerj-cs.3209), 2025-11-12
Supplement: Code.zip [file sultan_arabicT5_prediction.xlsx]

## Sheet: Sheet1
MSA	IrbidDial	T5
ما رأيك في مشاهدة فيلم آخر ؟	شو رأيك نشوف فيلم ثاني؟	شو رأيك تشوف فيلم ثاني؟
أريد كوبا من الماء لأتناول بعض الدواء , من فضلك .	بدي كاسة مي عشان اوخذ الدوا، لو سمحت.	بدي كاسة مي عشان أشربها, لو سمحت.
أبغي كرة .	بدي طابة.	بدي كرة.
كيف تحب أن يصفف شعرك اليوم ؟	كيف بدك يسرحلك شعرك اليوم؟	كيف بتحب تقص شعرك اليوم؟
أريد رداءا ذات أكمام طويلة .	بدي جاكيت كم طويل.	بدي جاكيت طويل.
ها-ها . صباح الخير حان دورك . إنه على ما يرام .	هههه. صباح الخير صار دورك. هو كويس.	هاد-ها. صباح الخير خلص دورك. كلك بخير.
أين نتقابل ؟	وين بدنا نتلاقى؟	وين نتقابل؟
لقد أثلج صدري زيارة مقاركم الرئيسية وكذا ما جرى بيننا من مناقشات مهمة . شكراً جزيلاً على ما أبديتموه من تعاون .	فرحت كتير لما زرت مكاتبكم الرئيسية وكمان النقاشات الهمة اللي صارت بيناتنا. كتير شكراً على العون اللي قدمتوه.	ثلجت صدري الزيارة لديوانكم الرئيسي وكذا ما دار بيننا من مناقشات مهمة. شكراً كثير على ما أبديتموه من تعاون.
هل هذا قطار مباشر ؟	هاذ القطار مباشر؟	هاظ القطار مباشر؟
إبريق من القهوة ، لطفاً .	بكرج قهوة، لو سمحت.	فنجان قهوة ، لو سمحت.
كم تكلفة الإفطار ؟	بقديش الفطور ؟	قديش بتكلف الفطور؟
من فضلك اختر لي مائدة ذات منظر ليلي لطيف .	من فظلك إختارلي طاولة مع منظر حلو بالليل.	لو سمحت إختارلي طاولة شكلها ليلي حلو.
أين الحلاق ؟	وين الحلاق؟	وين الحلاق؟
الشاطئ أسفل يمينا . ياله من منظر رائع .	الشط تحت على اليمين. شو المنظر بجنن.	البحر فوق يمين. هاظ منظر حلو.
كلاً ، إنهم متينين جداً .	لا، هظول كثير قويات.	لا، هم قويين كثير.
اتجه يسارا عند الناصية الثالثة .	روح يسار من عند الدخلة الثالثة .	روح عالشمال عند التقاطع الثالث.
أين المحطة النهائية للحافلة ؟	وين اخر موقف للباص؟	وين المحطة النهائية للباص؟
كم يتقاضى المرشد في اليوم ؟	قديش بيوخذ الدليل باليوم؟	قديش بتوخذ المرشد باليوم؟
أريد كيساً من الفشار ، من فضلك .	بدي كيس بوشار، لو سمحت.	بدي كيس فشار، لو سمحت.
من فضلك غير خمسين آلاف ين إلى دولارات أمريكية .	لو سمحت اصرف الخمسين ألف ين لدولر أمريكي.	لو سمحت غير خمسين ألف ين لدولارات أمريكية.
أريد قاموس جيب ، من فضلك .	بدي قاموس بنحط بالجيبة ، لو سمحت.	بدي قاموس جيب، لو سمحت.
من فضلك ، أريد فنجاناً من القهوة البيضاء .	لو سمحت ، بدي فنجان قهوة بالحليب.	لو سمحت، بدي فنجان قهوة أبيض.
هل يمكن أن أحصل على قمصاني نظيفة غداً صباحاً ؟	ممكن ألاقي قمصاني نظيفات بكرا الصبح؟	ممكن أجيب قمصاني نظيفة بكرا الصبح؟
حسنا , حجرتك يا آنسة هي رقم تسعة صفر ثمانية . هذا مفتاحك .	طيب، غرفتك يا آنسة هي تسعة صفر ثمنية. هاذ مفتاحك.	تمام, غرفتك يا آنسة رقم تسعة صفر تسعة. هاظ مفتاحك.
نعم ، بالطبع .	أيوا، أكيد.	اه ، أكيد.
ما تكلفة المقاعد الخاصة بالشرفة ؟	قديش بتكلف الكراسي تبعت البرندة؟	قديش حق الكراسي الخاصة بالقاعة؟
هل لي بدليل سياحي ؟	ممكن مرشد سياحي؟	ممكن دليل سياحي؟
أجل ، وأودّ محاسبة المطلوب هاتفياً على قيمة المكالمة .	صح، وأنا بدي احاسب يلي رنيت عليه على حق المكالمة.	اه ، بدي احاسبه على قيمة المكالمة.
جلد التمساح الأمريكي .	جلد التمساح الأمريكي.	جلد التمساح الأمريكي.
سأكون هنا الساعة الثامنة إلى الربع .	رح أكون هون الساعة ثمانية إلا ربع.	رح أكون هون الساعة ثمانية للربع.
أظن أن الملابس المصنوعة في اليابان قد جرى تفصيلها على نحو أفضل بالتأكيد .	بتوقع انو الأواعي اللي صنعت في اليابان تفصلت بطريقة أحسن أكيد.	بظن انه الملابس المصنوعة باليابان قد جهزت بشكل أحسن أكيد.
سأكون هناك حوالي السادسة مساءً .	راح أكون هناك حوالي الساعة ستة المسا.	رح أكون هناك حوالي الساعة ستة المسا.
لا أجيد الإنجليزية . هل ثمة من يتحدث اليابانية هنا ؟	أنا مش بعرف أحكي إنجليزي. في حدا بحكي ياباني هون؟	ما بعرف إنجليزي. في حدا بحكي ياباني هون؟
إنني أتصل من كشك عمومي في ماسي .	أنا بحكي معك من كشك عام بماسي.	أني بتصل من كشك عمومي في ماسي.
كم الوقت ؟	قديش الساعة؟	قديش الوقت؟
إنني أبحث عن هذا .	أني بدور على هاظ.	بدور على هاد.
لماذا لا تعطيها هدية ؟	ليش ما تعطيها هدية؟	ليش ما تعطيها هدية؟
استمتعنا بالعشاء .	كيفنا عالعشا.	استمتعنا بالعشا.
سأذهب بك على مقعدك . من هنا ، من فضلك .	راح اوديك على كرسيك. من هون، لو سمحت.	رح أروح عليك على كرسيك. من هون، لو سمحت.
سأعود إليك عندما تكون أقل انشغالاً .	راح أرجعلك بس تكون مش مشغول كثير.	رح أرجع عليك لما تكون مشغول.
أنا السيد تكاهاشي بالغرفة رقم خمسة تسعة وأربعين . من فضلك أرسل أربع زجاجات من بيرة بودفايزر .	أنا الأستاذ تكاهاشي بالأوضة رقم ٥٩ . لو سمحت بدي أربع بطولين من البيرة بودفايزر.	أنا السيد تكاكاهاشي بالغرفة رقم خمسة تسعة وأربعين. لو سمحت أرسل أربع قنينات بيرة بودفايزر.
حسنا ، إنه وقت الغداء . هل تحب أن نناقشه على الغداء ؟	ماشي، وقت الاكل صار. بتحب نحكي عنها واحنا ناكل؟	تمام ، هو وقت الغداء. بتحب تناقشه عالغدا ؟
هناك الكثير من الينابيع الحارة .	في كثير ينابيع حارة.	في كثير من الينابيع الحارة.
سر مباشرة ، من فضلك .	روح ع طول، لو سمحت.	روح مباشرة ، لو سمحت.
هل تمانع إذا التقطت صورة لك ولسيارتك الأجرة ؟	بتمانع لو أخذت صورة إلك وللتكسي تبعتك؟	بتمانع اذا صورتك وحطت صورة لك ولسيارتك؟
كم من الوقت نحتاج للذهاب مشياً من هنا إلى مبنى البلدية ؟	قديش بدنا وقت عشان نمشي من هون لبناية البلدية؟	قديش بدنا نروح مشي من هون لمبنى البلدية؟
هل تستطيع أن تخفض سعرها لوجود بعض البقع بها ؟	بتقدر ترخصها لأنه في عليها شوية بقع؟	بتقدر تخفض سعرها لوجود شوية بقع فيها؟
شكراً ، هذا يكفي .	شكراً ، هاظ بكفي.	شكراً ، هاظ يكفي.
أريد الشخص الذي يعد وثائق عادية في حجم ورقة الخطاب بدون الحاجة إلى طيهم .	بدي الشخص اللي بعمل الوثائق اللي بحجم الورق العادي بدون ما يظطر يثنيهم.	بدي الشخص يلي بتقدر تعدلي وثائق عادية بحجم ورقة الخطاب بدون الحاجة لطيهم.
هل نحتاج إلى طرح هذا للتصويت ؟ إن لم نكن في حاجة إلى هذا ، فإمكاني أن أعتقد حينئذ أننا قد وصلنا إلى نتيجة , سأقوم بإرسالها إلى مجلس إدارتنا صباح غد .	هل احنا محتاجين نحط هاظ للتصويت؟ اذا لأ، بتوقع أنه وصلنا للنتيجة، بدي أبعثها لمجلس ادارتنا بكرا الصبح.	بدنا نطرح هاد للتصويت؟ إذا ما كنا بحاجة هاد، بصير أروح على مجلس إدارتنا بكرة.
أين مترو الأنفاق ؟	وين المترو؟	وين مترو الأنفاق؟
كنت أفكر في الحصول على هذه الدورة في فترة نصف العام المقبلة .	كنت بفكر أوخذ هالكورس بفترة نص السنة الجاية.	كنت أفكر بأخذ هاي الدورة خلال فترة نصف السنة الجاي.
الخامس عشر من سبتمبر يوم احترام المسنين .	خمسطعش تسعة هو يوم احترام المسنين.	خمسة عشر من شهر عشرة يوم احترام المسنين.
ارفعوا أيديكم .	ارفعوا إيديكو	ارفعوا ايديكم.
أين موقف الحافلات ل بي ؟	وين مجمع الباصات ل بي ؟	وين موقف الباصات ل بي؟
قم بدفعها من فضلك , إن كان ذلك ممكنا .	لو سمحت دزها , إذا بصير	ادفعها لو سمحت, لو سمحت.
لقد نسيت أن آخذ حقيبتي اليدوية .	نسيت آخذ شنتة الإيد.	نسيت أوخذ شنتتي اليدوية.
فكرة صائبة . متى تخطط للمجيء ؟	فكرة صحيحة. متى بتنوي تيجي؟	فكرة صائبة. متى بتخطط تيجي؟
اثنان ويسكي مع الماء , من فضلك .	تنين ويسكي مع مية, لو سمحت.	اثنين ويسكي مع المي, لو سمحت.
على فكرة , هل أنت غير مشغول السبت القادم ؟	بالمناسبة، راح تكون فاضي السبت الجاي؟	على فكرة, انت مش مشغول السبت الجاي؟
هل لديك هذا باللون الأخضر الداكن ؟	عندك هاذ باللون الاخضر الغامق؟	عندك هاظ باللون الأخضر الداكن؟
هالو ، هل هذه تعود إلى روي ؟	مرحبا، هاي لروي؟	مرحبا ، هاي ترجع ل روي ؟
أريد حامل ثلاثي .	بدي حامل ثلاثي.	بدي حامل ثلاثي.
عظيم . كنت أبحث عن سيارة أجرة لكن هذا أفضل .	كتير حلو. كنت قاعد بدور على تاكسي بس هاي احسن.	عظيم. كنت بدور على تاكسي بس هاظ أحسن.
ثلاثة اثنان واحد اثنان . انتظر ثانية ، حسنا ؟ أريد أن أرسل لك شيئاً هنا . معذرة .	ثلاثه اثنين واحد اثنين. استناني شوي , طيب؟ بدي أبعثلك اشي هون. اعذرني.	ثلاث اثنين واحد اثنين. استنى مرة ثانية، لو سمحت. بدي أبعثلك اشي هون.
حسنا ، إنه باهظ الثمن . إنه لم يصنع في اليابان ، أليس كذلك ؟	تمام ، هو غالي .اكيد مش صنع اليابان، مش؟	تمام ، هاظ غالي. ما صنع باليابان ، صح ؟
ويسكي اسكتلندي وماء من فضلك .	ويسكي اسكتلاندي ومية لو سمحت.	ويسكي اسكتلندي وماء لو سمحت.
هل توجد أية كازينوهات جيدة ؟	في أي كازينوهات حلوة؟	في كازينوهات كويسه ؟
إنها عاملتني كما لو كنت متسولاُ .	عاملتني كإني شحاد.	هي عاملتني كمان كمان كنت متسول.
شخص ما فتح الطرد الخاص بي .	في حد فتح الطرد تبعي.	حدا فتح الطرد تبعي.
هل تريد أن افحص موتور السيارة ؟	بدك ياني أفحص ماتور السيارة؟	بدك افحص موتور السيارة؟
أنا في نزهة طويلة سيرا على الأقدام .	أني طالعة برحلة طويلة تمشاية عجري.	أنا برحلة طويلة مشي على الأقدام.
هذه الأيام ، استخدم الكمبيوتر بشكل دائم في العمل .	هاي الأيام ، أنا بستخدم الكمبيوتر دايماً بالشغل.	هسا، استعمل الكمبيوتر بشكل دائم بالشغل.
موظفو المبيعات في هذا المتجر لطفاء جداً .	موظفين المبيعات بهاذ المحل لطيفين كثير.	موظفو المبيعات بهاد المحل كويس كثير.
الثاني من على اليسار .	الثاني عالشمال .	الثاني من على اليسار.
هل أنزل هنا لمركز روكفيلر ؟	أنزل من هون عمركز روكفيلر؟	أنزل هون لمركز روكفيلر؟
هذه السيدة كاوازو في غرفة رقم ستة عشر أحدى عشر .	هاي الست كاوازو بالغرفة سطعش إحدعش.	هاي السيدة كاوازو بالغرفة رقم ستةعشعش واحدعش.
هل تستطيع خفضها حتى عشرين دولار ، من فضلك ؟	بتقدر تنزلها لعشرين دولار، لو سمحت؟	بتقدر تخفضها لربعين دولار، لو سمحت؟
أشعر بتحسن .	حاس بتحسن.	بحس بتحسن.
هل يمكنكم صرف الشيك ذو المائتي دولار الخاص بي ؟	بتقدروا تصرفولي الشيك أبو الميتين دولر تاعي؟	ممكن تصرفوا الشيك المائتي دولار تبعي؟
ولكن لا ضرورة لدفع بقشيش .	بس ما في داعي للبخشيش.	بس ما في داعي تدفع بقشيش.
لقد جاء لتوه .	جا هسا.	طلع تاني.
لنتصل به .	خلينا نرلنه.	خلينا نرن عليه.
بالمناسبة ، اسمي هيروش إيجيما .	بالمناسبة، اسمي هيروشي ايجيما.	بالمناسبة، اسمي هيروش إيجيما.
التاسع والعشرون من أغسطس .	تسعه وعشرين من آب.	تسعة وعشرين من شهر خمسة.
هل لا زال لديكم مقاعد لعرض الليلة ؟	ظل في عندكم محلات لعرض الليلة؟	عندكم كراسي لعرض الليلة؟
أريد القيام بحجز للساعة الثالثة والنصف ظهراُ .	بدي أعمل حجز للساعة ثلاثة ونص الظهر.	بدي أحجز للساعة ثلاث ونص الظهر.
سوف نحضرها الآن . ما هو رقم غرفتك ؟	رح نجيبها هلا . شو رقم غرفتك ؟	رح نجيبها هسا. شو رقم غرفتك؟
رقم غرفتي هو ثلاثة ستة وعشرين . هل يمكن أن تأخذ الغسيل ؟	رقم غرفتي هو ثلاثة ستة وعشرين. بصير توخذ الغسيل؟	رقم غرفتي ثلاث ستة وعشرين. بتقدر تغسل؟
أليس لديك دروس تجريبية ؟	ما عندك كورسات تجريبية؟	عندك دروس تجريبية؟
رحلة الطيران دلتا رقم ثمانية وعشرون والمتجهة إلي نيو أورلينز سوف تتأخر حوالي ساعة .	رحلة الطيارة دلتا رقم ثمانية وعشرين اللي رايحة على نيو أورلينز حتى تتأخر حوالي ساعة.	رحلة الطيران دلتا رقم تسعة وعشرين اللي رايحة على نيو أورلينز رح تتأخر حوالي ساعة.
هل لديكم غرفة متاحة الليلة ؟	عندكم غرفة فاضية الليلة ؟	عندكم غرفة متوفرة الليلة؟
بصراحة ، لا أتفق مع ذلك .	بصراحة، ما بتفق مع هاظ.	بصراحة، ما بوافق على هاد.
هل لك أن تتفضل وتملأ هذه ؟	بتقدر تتكرم و تعبي هاي؟	ممكن تجيبلي هاي؟
يبدو أن النقود التي أعطيتني إياها ناقصة عشر دولارات .	شكله المصاري اللي إنطيتني اياها ناقصة عشر دولارات.	شكله المصاري اللي أعطيتني اياها ناقصة عشر دولارات.
بالخارج .	برا.	بالخارج.
أريد ما يخصني لكي أرحل .	بدي اللي بخصني مشان أروح.	بدي إشي يخصني عشان أروح.
هل يمكن أن ترسلها إلى عنواني في اليابان عن طريق بريد الطرود الدولي وتحصل الثمن من هناك ؟	ممكن توديها على عنواني باليابان عن طريق صفحة الطرود الدولي و توخذ حقه من هناك ؟	بتقدر تبعثها على عنواني في اليابان عن طريق البريد الدولي وتحصل الثمن من هناك؟
أين قسم السيدات ؟	وين قسم النسوان؟	وين قسم السيدات؟
إنه ألم حاد .	هو وجع قوي.	هاظ الوجع شديد.
إنني في نفس السن .	أني بنفس العمر.	أنا بنفس السن.
فكرة جميلة .	فكرة حلوة.	فكرة حلوة.
هل الأجانب يمكنهم الحصول على الكتب في المكتبة ؟	بقدروا الأجانب يستخدموا الكتب بالمكتبة؟	الأجانب بقدروا يجيبوا الكتب بالمكتبة؟
تحية . أنا جون .	مرحبا. أني جون.	تحية. أنا جون.
هل يمكن أن نبدأ اللعب عندما ينتهون ؟	بنقدر نبلش نلعب لما يخلصوا؟	ممكن نكمل اللعب لما يخلصوا؟
مائة وخمسة وثلاثون ين للدولار الواحد .	مية وخمسة وثلثين ين للدولار الواحد.	مية و ثلاثين ين للدولار الواحد.
نعم . انتظر , سوف احضر لك واحدة .	طيب. استنى، راح أجيبلك وحدة.	اه. استنى, رح اجيبلك وحدة.
هلا أنزلتني عند فندق هلتون من فضلك ؟	ممكن تنزلني عند فندق الهيلتون لو سمحت؟	ممكن تنزلني عند فندق هلتون لو سمحت؟
أين الاستعلامات الرياضية ؟	وين الاستعلامات الرياضة؟	وين الاستعلامات الرياضية؟
هذه هي فلوس أقلام الحبر . فاتورة بمائة دولار .	هايذ حق قلام الحبر. فاتورة بمية دولار.	هاي فلوس أقلام الحبر. فاتورة بمائة دولار.
لا ، شكراً . من الأفضل أن لا أشرب المزيد .	لا، شكراً. احسنلي ما أشرب اكثر من هيك.	لا، شكراً. لازم ما أشرب المزيد.
بما في ذلك الإفطار ، والضريبة ، ورسم الخدمة ، سيكون الحساب خمسة أربعون دولارا للشخص الواحد في الليلة .	بتشمل الفطور، الضرايب، ورسم الخدمة، الحساب رح يكون خمسة وأربعين دولار للواحد في الليلة.	ما عدا الفطور، وضريبة الخدمة، ورسوم الخدمة، ورسوم الخدمة، ورسوم الخدمة، ورسوم الخدمة، ورسوم الخدمة، ورسوم الخدمة، ورسوم الخدمة، ورسوم الخدمة، ورسوم الخدمة، ورسوم الخدمة، ورسوم الخدمة، ورسوم الخدمة، ورسوم الخدمة، ورسوم الخدمة، ورسوم الخدمة، ورسوم الخدمة، ورسوم الخدمة، ورسوم الخدمة، ورسوم الخدمة، ورسوم الخدمة، ورسوم الخدمة، ورسوم الخدمة، ورسوم الخدمة، ورسوم الخدمة، ورسوم الخدمة، ورسوم الخدمة، و ضري…
ما عرض الأوبرا اليوم ؟	شو عرض الأوبيرا اليوم؟	شو عرض الأوبرا اليوم؟
أريد مقعداً يطل على الممر ، من فضلك .	بدي كرسي يطل عالممر، لو سمحت.	بدي كرسي يطل على الممر، لو سمحت.
أجل أريد شيئاً أقرؤه .	أيوا بدي إشي أقراه.	أه بدي إشي أقرأه.
غير محتمل بدرجة كبيرة .	بنطاقش بدرجة كبيرة.	مش محتمل كثير.
هل تعرف المطعم يا كيويا ؟	بتعرف المطعم يا كيويا؟	بتعرف المطعم يا كيويا؟
يستطيع الصرافون أن يغيروا دولاراتك من أجل بقشيش الكازينو . هل نذهب ؟	السمسارين بقدروا يصرفولك الدولرات عشان بخشيش الكازينو. بصير نروح؟	بصير الصرافين يغيروا دولاراتك عشان بقشيش الكازينو. نروح؟
يسعدنا أن نقدم لك الشراب الذي تريده متبوعاً بالغداء . دليل كامل بالمشروبات التي نقدمها على رحلتنا موجودة في دليل المعلومات الخاص بمجلتنا .	بسعدنا إنه نقدملك العصير اللي بتختاره وبيلحقه الغدا . منوفر قائمة كاملة من الشراب في هاي الرحلة موجودة بقسم المعلومات تاع مجلتنا.	احنا بنقدر نقدملك الشراب يلي بدك اياه قبل العشا. دليل كامل بالمشروبات يلي بدنا اياها على رحلتنا موجود بدليل المعلومات الخاص بمجلتنا.
هل أستطيع تأجير أداة للتنفس أثناء السباحة ؟	بقدر أستأجر شغلة للتنفس خلال السباحة؟	بقدر أستأجر أداة للتنفس أثناء السباحة؟
آه . هل يمكنني الحصول على وجبتي فيما بعد ؟ أنا أشعر أنني لست على ما يرام الآن .	ممم. ممكن أخد وجبتي بعدين؟ حاسس حالي مش على بعضي هسا.	آه. بقدر أجيب أكلة بعدين؟ أنا مش حاس حالي مش كويس هسا.
ما هو رقم الرحلة الجوية ؟	شو رقم رحلة الطيران؟	شو رقم الرحلة الجوية؟
أبغي تأجير سيارة من هذا الطراز لمدة يومين .	بدي استأجر سيارة من هاذ الموديل لمدة يومين.	بدي أستأجر سيارة من هاد الطراز لمدة يومين.
أنا غير متأكد إذا كنت قد حزمت ملابس كافية لرحلة مدتها ثلاثة أيام .	أنا مش متأكد اذا جهزت وعية بتكفيني لرحلة مدتها ثلاث أيام.	أنا مش متأكد إذا كنت حزمت ملابس كافية لرحلة مدتها ثلاث أيام.
يوجد بجانب هذا المبني تحديداً .	هو جنب هاذ المبنى بالتحديد .	في جنب هاد المبني بالتحديد.
هه . هذه . يبدو اللون جميلاً عليك .	هه. هاي. شكل اللون حلو عليك كثير.	هاظ. هاي. لونها حلو عليك.
هل أستطيع تناول غذائي الآن ؟	ممكن أوكل هسا؟	بقدر اكل هسا؟
هل يتوقف القطار في برايتون ؟	بوقف القطار عند برايتون؟	القطار بوقف برايتون؟
من المهم جدا أننا نستطيع الوصول إلى المواد الخام التي نحتاجها في المشروع .	اشي كثير مهم إنه قدرنا نوصل لمجموعة المواد الأساسية اللي راح نحتاجها للمشروع.	مهم كثير انه بنقدر نوصل المواد الخام اللي بدنا اياها بالمشروع.
أود أن أطلب بدلة داكنة من أجلي .	بدي أطلب بدلة لونها غامق عشاني.	بدي أطلب بدلة داكنة عشاني.
هذا جيد . متى هو ؟	هيك تمام. متى رح يكون؟	هاظ كويس. متى هو؟
أرغب في شراء شامبو .	أنا بدي أشتري شامبو.	بدي أشتري شامبو.
خمسون جنيهاً .	خمسين قنيه.	خمسين جنيه.
لا يوجد رسم ضروري .	مش موجود رسم ظروري.	ما في رسم ضروري.
هل كان لديك أية خدمات أخرى إلى جانب طعام الإفطار هذا الصباح ؟	في عندك أي خدمات ثانية غير فطور الصبح؟	عندك خدمات ثانية بعد الفطور الصبح؟
متى يفتح المصرف ؟	أميت بفتح البنك؟	متى بفتح المصرف؟
إجمالي المبلغ المطلوب مائتان وثلاثة وأربعون جنيه ، يا سيدتي .	المبلغ الكلي بطلع ميتين وثلاثة وأربيعين جنيه، يا مدام.	إجمالي المبلغ المطلوب مية و أربعين جنيه ، يا سيدتي.
لماذا لم يأت إلى الحفلة أمس ؟	ليش ما اجى على الحفلة امبارح؟	ليش ما يجي الحفلة اليوم؟
أريد لفتان من ISO مائة ، فيلم ملون ، ستة وثلاثين لقطة ، من فضلك .	بدي لفتين أيزو مية، فلم ملون، ستة وثلاثين لقطة ، لو سمحت.	بدي لفتين من IS مية، فلم ملون، ستة وثلاثين لقطة، لو سمحت.
هل لديك مرآة ؟	عندك مراية؟	عندك مرآة ؟
هل من المقبول عدم اتباع أي شخص لتعليمات الأمن ؟	بصير حدا ما يتبع تعليمات الأمن؟	ممكن أي واحد ما يلتزم بتعليمات الأمن؟
علىّ أن ألحق بطائرة العاشرة صباحاً .	لازم ألحق طيارة الساعة عشرة الصبح.	لازم ألحق بطائرة التسعة الصبح.
من اين يمكنني الحصول على مسكوكة لركوب المترو ؟	من وين ممكن أجيب تذكرة لأركب المترو؟	من وين بقدر اجيب مسكوكة لركوب المترو؟
أين يمكنني تغير نقودي ؟	وين بقدر أصرف مصاريي؟	وين بقدر اغير مصاريي؟
هل بها جهاز تدفئة ؟	بيها جهاز تدفئة؟	فيها جهاز تدفئة؟
أريد بعض الكريم الليلي .	بدي كريم ليلي.	بدي شوية كريم ليلي.
كم تتقاضى ثمنا لإرسالها لليابان ؟	قديش بدك توخذ عشان تبعثها على اليابان؟	قديش بتوخذ حق لإرسالها لليابان؟
أكيدا التي تتحدث معك ، أنا عندي حجز مائدة في تمام الساعة السادسة والثلث هذا المساء . ولكني آسفة لأني سأصل متأخرة نصف ساعة .	أكيدا يلي بتحكي. عندي حجز طاولة عالساعة ستة و ثلث المسا. بس آسفة لإني رح أوصل متأخرة نص ساعة.	أكيد اللي بحكي معك، أنا عندي حجز طاولة الساعة ستة ونص المسا. بس آسف لأني رح أتأخر نصف ساعة.
متي سنستقل القارب ؟	متى بدنا نركب القارب؟	متى رح نركب القارب؟
أرغب في غرفة بحمام .	بدي غرفة بحمام.	بدي غرفة بحمام.
معذرة , متي ينتهي هذا الفيلم ؟	عفواً, متى بخلص هذ الفلم؟	معلش، متى بخلص هاد الفلم؟
لقد تمكنت من تحقيق ذلك .	قدرت أوصل لهذا الشي.	نجحت.
هل هو طريق طويل ؟	هو الطريق طويل؟	هو طريق طويل؟
ما هي الأنواع التي لديكم ؟	شو الأنواع اللي عندكم؟	شو الأنواع اللي عندكو؟
سأرتبك . هل تمانع في رسم خريطة لي ؟	رح أرتبك. ما عندك مشكلة ترسملي خريطة؟	رح أرتبك. بتمانع ترسملي خريطة؟
لدينا جمبري رائع جداً اليوم .	عنا جمبري مميز كثير اليوم.	عنا جمبري حلو اليوم.
هل لديك أيّ خرائط بسيطة للمدينة ؟	عندي أي خرايط بسيطة للمدينة؟	عندك خرائط بسيطة للمدينة؟
معذرة أريد الذهاب إلى فندقي في المدينة بالحافلة . أين يمكن أن أستقل حافلة ؟	عفواً، أنا بدي أروح على الفندق موجود بالمدينة بالباص. من وين بقدر آخذ باص؟	معلش بدي أروح على فندقي بالمدينة بالباص. وين ممكن أركب باص؟
شكراً . لكنني لا أعتقد أن عندي وقت للإقامة لمدة ليلتين . هل يمكنك حجز غرفة بسريرين لي في ذلك الفندق ليلة الثاني عشر من مارس فقط ؟	شكراً ، بس ما بتوقع أنه معي وقت عشان أظل ليلتين. ممكن تحجزلي غرفة مزدوجة في الفندق لليلة اثنعش ثلاث بس؟	شكرا. بس ما عندي وقت أحجز غرفة بس ليلة ثلاثطعش من شهر تسعة بس.
بالتأكيد . كيف يمكننا خدمتك ؟	أكيد. كيف منقدر نخدمك؟	أكيد. كيف بقدر خدمتك؟
شيكات سياحية . شكراً . خذ تذكرتك وبطاقة المرور للصعود على متن الطائرة . كن هناك قبل وقت الرحلة بساعة من فضلك .	شيكات سياحية. شكراً. أخذ تذكرتك و الفيزا عشان تطلع على الطيارة. كون هناك قبل الرحلة بساعة لو سمحت.	شيكات سياحية. شكرا. خذ تذكرتك وبطاقة المرور للصعود على الطيارة. كن هناك قبل وقت الرحلة بساعة لو سمحت.
أوافق . يجب أن تصبح طبيعية جداً .	أنا موافق. لازم تصير طبيعة كثير.	موافق. لازم تكون طبيعية كثير.
أهذه عيادة إف ؟	هاي عيادة إف؟	هاي عيادة إف؟
هل لك أن تغيرهم إلى دولارات من فضلك ؟	ممكن تحولي اياهم لدولارات، لو سمحت؟	ممكن تغيرهم دولارات لو سمحت؟
حسناً . أراك الساعة الثانية يوم الأحد .	تمام . بشوفك الساعة ثنتين يوم الأحد.	تمام. بشوفك الساعة ثنتين يوم الأحد.
هل يمكنك أن تشذب شاربي ؟	ممكن لو سمحت ترتبلي شواربي؟	بتقدر تشذب شاربي؟
أود أن أصرف هذا الشيك بسبعين دولاراً .	بدي أصرف هاذ الشيك بقيمة سبعين دولر.	بدي أصرف هاد الشيك بسبعين دولار.
الجزء المكتوب بالطريقة المائلة يشير إلى التغييرات التي حدثت في التسعينات .	الجزء اللي مكتوب بالطريقة المايلة بدل على التغييرات اللي صارت بالتسعينات.	الجزء المكتوب بالطريقة المائلة بيحكي عن التغيرات اللي حدثت في التسعينات.
هل تشمل هذه الرحلة زيارة لبرج سيرز ؟	بتشمل هاي الرحلة زيارة لبرج سيرز؟	هاي الرحلة فيها زيارة لبرج سيرز؟
أين ستنتهي الجولة ، ومتى ؟	وين راح تخلص الرحلة، و أميت؟	وين رح تنتهي الجولة، متى؟
تفضل هذان دولاران . احتفظ بالباقي .	تفظل هي دولرين. خلي الباقي إلك.	تفضل هادن دولارين. خلي الباقي من الباقي.
هل يوجد أي محل متعدد الأقسام قريب من هنا ؟	في أي مول قريب من هون؟	في محل متعدد الأقسام قريب من هون؟
هل ستزال تعمل جدول المواعيد ؟	هل رح تظل جدول المواعيد شغّالة؟	رح تبطل جدول المواعيد؟
سوف آخذ هذه ، من فضلك .	راح آخذ هاظ ، لو سمحت.	راح آخذ هاي، لو سمحت.
يقولون أن اليابان دولة غنية جداً .	بقولوا أنه اليابان بلد غني.	بقولوا اليابان دولة غنية كثير.
ملعقتين , من فضلك .	معلقتين , لو سمحت.	ملعقتين, لو سمحت.
أجل ، واحدة فقط . متى سأعرف ؟ وكيف سيتم تعويضي ؟	أها، بس وحدة؟ متى رح أعرف؟ وكيف رح يكون التعويض؟	اه ، وحدة بس. متى رح اعرف ؟ وكيف رح أعوض ؟
هناك ، أمام بيانات السائح تماما .	هناك ، قدام بيانات السايح بالزبط .	هناك، مع بيانات السائح تماما.
أين أجد الاسطوانات المدمجة ؟	وين بلاقي السيديات؟	وين الاقي الاسطوانات المدمجة؟
أنا متأثر للغاية , لا أستطيع البقاء ساكنا .	أنا متأثر كتير, ما قادر أضل ساكت.	أنا متأثر كثير, مش قادر أظل ساكن.
هل هو قريب لنصل إليه سيراً .	هو قريب عشان نوصلو مشي؟	هو قريب عشان نوصله مشي؟
إني من إسبانيا .	أنا من إسبانيا.	أنا من إسبانيا.
ـ أين أقرب محل جزارة ؟	وين أقرب لحام؟	وين أقرب محل جزارة؟
أود تأجير هذا الطراز من السيارات لمدة أربعة وعشرين ساعة .	بدي أستأجر هاذ الموديل من السيارات لمدة أربع وعشرين ساعة.	بدي أستأجر هاد الطراز من السيارات لمدة أربعة وعشرين ساعة.
لا يمكن أن أبيع هذه دون روشتة .	ما بقدر أبيع هاي بدون وصفة طبية.	ما بقدر ابيع هاي بدون وصفة.
هل لديك صحف يابانية ؟	عندك جرايد يابانية؟	عندك صحف يابانية؟
هل هذا الحذاء متين ؟	هاذ البوط قوي؟	هاظ الحذاء قوي ؟
لكنّي لدى موعد لرؤيتها في السّاعة الثّانية .	بس أنا عندي موعد عشان أشوفها الساعة ثنتين.	بس عندي موعد لشوفتها الساعة ثنتين.
هل لديك غرف أكبر ؟	عندك غرف أكبر؟	عندك غرف أكبر؟
اعطني عامل التليفون من فضلك .	إعطيني عامل التلفون لو سمحت .	اعطيني عامل التلفون لو سمحت.
ظننت أنكم أيها الشباب تأكلون الكعك المخبوز فقط .	فكرت إنكو يا شباب بتوكلوا الكعك المخبوز بس.	ظننت انوكم يا شباب بتشربوا الكعك المخبوز بس.
أريد استئجار كرسي مركب .	بدي أستأجر كرسي اتمدد عليه.	بدي استأجر كرسي مركب.
أنا أبحث عن شيء أنيق .	أني بدور على اشي لايق.	أنا بدور على اشي أنيق.
حسناً . هل يجب أن أقوم بتركيزها ؟	ماشي. لازم أساويها مركزة؟	تمام. لازم اركزها؟
قهوة مع القشدة والسكر ، من فضلك .	قهوة مع القشطة والسكر، لو سمحت.	قهوة مع القشدة والسكر، لو سمحت.
سوف ننتظر . من فضلك اتصل بنا عندما تكون مستعداً .	رح نستنى . لو سمحت, إتصل فينا لما تكون جاهز.	رح ننتظر. لو سمحت رن معنا لما تكون مستعد.
فقط سياحة .	بس للسياحة.	بس سياحة.
أحتاج إلى طيب .	بدي دكتور.	بدي طيب.
إن الجونلات القصيرة ومعها الأحذية الطويلة لن تنقضي موضتها .	مش ممكن تخلص موضة التنانير القصيرة مع الجزم الطويلة.	الجونلات القصيرة ومعها الأحذية الطويلة ما رح تنقضي.
ألا ترغب في فنجان شاي ؟	ما بدك تشرب كاسة شاي؟	بدك فنجان شاي؟
ليس تماماً . فقط شيء ما غير غالي الثمن .	مش هيك. بس إشي مش غالي.	مش تمام. بس اشي مش غالي.
إذا كنت تودّ ، بإمكاننا الاستراحة هنا .	إذا إنت حاب، ممكن نستريح هون.	اذا بدك ترتاح هون.
هل هذه كلها هي حقائبك ؟	هاي كلها شناتيك؟	هاي كلها شناتيك؟
هل تريد بالحلويات ؟	بدك حلويات؟	بدك بالحلويات؟
نعم ، لكن ليس قويا جدا .	اه ، بس مش قوي كثير.	اه ، بس مش قوي كثير.
ويسكي وماء ، من فضلك . هل لديكم وجبة خفيفة معه ؟	ويسكي ومي، لو سمحت. عندكم سندويشة صغيرة او شيء خفيف معه؟	ويسكي وماء، لو سمحت. عندكو وجبة خفيفة معه؟
أتعرف كاثي ؟ إنه عيد ميلادها .	بتعرف كاثي؟ هاي حفلة عيد ميلادها.	بتعرف كاثي ؟ هو عيد ميلادها.
أود تحميض هذا الفيلم . متي سيكون جاهزا ؟	بدي أحمض هالفلم. متى رح يكون جاهز؟	بدي اعمل هاد الفلم. متى رح يكون جاهزا؟
تشغل أشخاصاً جدد في أبريل .	رح توظف ناس جداد في نيسان.	بتشغل ناس جدد بأبريل.
سأكون سعيدا بذلك . متى ترغب في ذلك ؟	رح اكون مبسوط لهالشي. متى بدك ياه؟	رح أكون سعيد. متى بتحبها ؟
رائع .	بجنن.	حلو.
من فضلك اتجه يساراً عند التقاطع التالي .	لو سمحت روح عاليسار بالتقاطع الجاي.	لو سمحت روح عالشمال عند التقاطع الثاني.
هلا أريتني بعض الفساتين ؟	ممكن توريني شوي من الفساطين؟	ممكن تشوفلي شوية فسطانات؟
أين المقهى ؟	وين الكوفي شوب ؟	وين المقهى؟
لا يمكنك جلب الألعاب النارية إلى كندا .	ما بتقدر تجيب ألعاب نارية على كندا.	ما بتقدر تجيب الألعاب النارية على كندا.
اعتقد أن هذا عالي قليلا بالنسبة لي .	بتوقع أنه شوي عالي بالنسبة الي.	بتوقع هاظ عالي شوي بالنسبة الي.
لم يعد بإمكانك حقيقةً أن تقوم بعمل تصميم دون كمبيوتر بعد الآن .	بطلت تقدر تعمل تصميم بدون كمبيوتر من هون و طالع.	ما بتقدر تعمل تصميم بدون كمبيوتر هسا.
أريد اسطوانة مدمجة .	بدي سي دي.	بدي اسطوانة مدمجة.
هل يمكنني حجز غرفة بسريرين تطل على المحيط ؟	بصير أحجز غرفة بتختين بطل على البحر؟	بقدر احجز غرفة بسريرين تطل على المحيط؟
مايومي , هل تسمح أن تملأ هذه الورقة بتوقيعك ؟	مايومي، ممكن تعبيي هاي الورقة بتوقيعك؟	مايومي, بتسمح تغلف هاي الورقة بتوقيعك ؟
هلا أرشدتني إلى مطعم مفضل بين الشبان ؟	ممكن ادلني على مطعم معروف بين الشباب؟	ممكن تدلني على مطعم بحبه الشباب؟
حجزنا مقعداً ليوم الخامس والعشرين من أكتوبر في الساعة الحادية عشر صباحاً .	حجزنا مقعد لخمسة و عشرين من شهر عشرة الساعة احدعش الصبح.	حجزنا مقعد ليوم خمسة وعشرين من شهر خمسة الساعة تسعة الصبح.
إن الناس ودودون جداً .	الناس حابيين كثير.	الناس كثير كويسين.
متى يتعين علي أن أكون في المحطة ؟	أي وقت لازم أكون بالمحطة؟	متى لازم أكون بالمحطة؟
ليس هذا صحيحاً . أنت دائما تعاملني .	هاظ مش صحيح . إنت دايما بتعاملني.	مش صحيح. انت دائما بتعاملني.
ما نوع العصير الذي تفضله ؟	شو نوع العصير اللي بتحبه ؟	شو نوع العصير يلي بتحبه؟
هل لي في بعض الفلفل ؟	ممكن أخذ شوي فلفل؟	ممكن أجيب فلفل؟
احتاج إلى بعض الهدايا التذكارية من نيويورك .	أنا بدي شوية هدايا تذكارية من نيويورك.	بدي شوية هدايا تذكارية من نيويورك.
اسمي " تارو تاناكا " لدي حجز مسبق .	اسمي " تارو تاناكا " عندي حجز من قبل.	اسمي " تارو تاناكا" عندي حجز مسبق.
إنها الثالثة والربع .	الساعة ثلاثة وربع.	هي ثلاث وربع.
كم التكلفة كلها ؟	قديش الكلفة كلها؟	قديش بكلف كلهم؟
لا أدري كم من النقود يجب علىّ تركه كبقشيش ؟	ما بعرف قديش لازم أترك بغشيش.	ما بعرف كم من النقود لازم أتركه كمكافأة ؟
سآخذ شيكولاتة ساخنة .	بدي آخذ هوت شوكليت.	راح آخذ شيكولاتة ساخنة.
ماذا تنوي أن تفعل عقب الانتهاء من المدرسة . ؟	شو بتخطط تعمل بعد ما تخلص مدرسة؟	شو بدك تعمل بعد ما تخلص من المدرسة؟
أشعر بالغثيان .	بحس حالي بدي أتقيء.	حاس حالي غثيان.
ماذا ؟ هل عليك دفع ضرائب عندما يكون لديك أكثر من ثلاثة زجاجات كحول ؟	شو؟ عليك ضرايب بس يكون عندك أكثر من ثلاث قناني كحول؟	شو؟ لازم تدفع ضرائب لما يكون عندك أكثر من ثلاث زجاجات كحول؟
لقد حصلت على بطارية فارغة .	بطاريتي صارت فاضية.	حصلت على بطارية فارغة.
معذرة . أنا طالب جامعي من اليابان . هل أنتم طلاب في جامعة نيويورك ؟	معلش، أنا طالب جامعي من اليابان. إنتوا طلاب بجامعة نيو يورك؟	عفوا. أنا طالب جامعي من اليابان. أنتم طلاب بجامعة نيويورك ؟
من الذي يعزف ؟	مين اللي عم يعزف؟	مين اللي بعزف؟
معطف رائع . هل هو صناعة بريطانية ؟	جاكيت حلو. هاد صنع بريطاني؟	ثوب حلو. هو صناعة بريطانية؟
هل لديكم فيلم شفاف ملون ؟	عندك فلم شفاف ملون؟	عندكم فيلم شفاف ملون؟
أين قسم السيدات ؟	وين قسم النسوان؟	وين قسم السيدات؟
جميل الفستان التي ترتدينه .	حلو الفسطان اللي لابسيته.	حلو الفستان اللي بتلبسه.
تموج شعر دائم مشدود من فضلك .	كيرلي عطول مشدود، لو سمحت.	شعر دائم مشدود لو سمحت.
هل لدينا وقت كاف لإنهاء إجراءات المغادرة ؟	معنا وقت كافي لنخلص إجراءات المغادرة؟	عنا وقت كاف حتى نخلص إجراءات المغادرة؟
هل هناك جولة بالحافلة تجوب المدينة ؟	في دورة بالباص نلف بالبلد؟	في جولة بالباص بتطوف المدينة؟
هل أستطيع الحصول على تذكرة متعددة الاستخدام ؟	ممكن أوخذ بطاقة ذكية؟	بقدر اخد تذكرة متعددة الاستخدام؟
كان فيلم " حرب الكواكب " أكثر الأعمال شعبية عام ألف وتسعمائة وأربعة وثمانون .	كان فيلم "حرب الكواكب" من أشهر الأفلام سنة ألف وتسعمائة وأربعة وثمانون.	كان فيلم "حرب الكواكب" أكثر الأفلام شعبية عام ألف وتسعمية وتسعين.
أوه ، يجب أن تخطر القنصلية على الفور .	أوه، لازم تبلغ القنصلية هسا.	اه ، لازم تخطر القنصلية فورا.
هل يوجد ملهى ليلي جيد به عرض رقصة الفلامنكو ؟	في نايت كلوب رايق عنده رقصة الفلامنكو؟	في ملهى ليلي كويس فيه عرض رقصة الفلامنكو؟
لماذا لم تقلع الرحلة ؟ أخبرني عما يجري .	ليش ما طلعت الرحلة؟ قلي شو بصير.	ليش ما رح تطير الرحلة؟ قلي شو رايك.
سأصبح بديناً في حال ما ظللت جالساً هنا آكل باستمرار .	رح أصير ناصح لو استمريت قاعد هون آكل دايما.	رح أكون بدين لو بقيت هون آكل باستمرار.
هل على السيدات ارتداء فستان سهرة ؟	لازم الستات يلبسن فسطان سهرة؟	لازم النساء يلبسن فستان سهرة؟
حسنا إذاً ، أريد عصا مضرب أصغر كتلك التي مع جوليا روبرتس .	ماشي يعني، بدي عصاة مضرب اصغر مثل اللي مع جوليا روبرتس.	تمام ، بدي عصا مضرب أصغر زي اللي مع جوليا روبرتس.
أريد أن اتصل هاتفياً بالسفارة اليابانية .	بدي أحكي بالتلفون مع السفارة اليابانية.	بدي احكي مع السفارة اليابانية.
هل هذه السجائر معتدلة ؟	هاي السقاير معتدلة؟	هاي السجائر معتدلة ؟
هل هذا طلب شخص آخر .	هاظا طلب واحد ثاني؟	هاظ طلب واحد ثاني؟
في حالة إمكان ذلك , احجز منضدة بالقرب من النافذة من فضلك .	لو في امكانية, احجزلي طاولة عند الشباك لو سمحت.	لو بقدر احجز طاولة قريبة من الشباك لو سمحت.
هل يمكن أن نحجز طاولة لخمسة أشخاص ؟	ممكن نحجز طاولة لخمس أشخاص؟	ممكن نحجز طاولة لخمس أشخاص؟
شركة الخطوط الجوية اليابانية ، طائرة رقم واحد اثنان ثلاثة .	شركة الخطوط الجوية اليابانية، رحلة الطيران رقم واحد اثنين ثلاثة.	شركة الخطوط الجوية اليابانية، طيارة رقم واحد اثنين ثلاثة.
من فضلك اتصل بي في الفندق عندما تجد حقائبي .	من فضلك، كلمني بالفندق لما تلاقي شنطي.	لو سمحت رنلي بالفندق لما تلاقي شناتيي.
ذلك الحد الأدنى للسعر .	هيك أقل سعر.	هاد السعر الأدنى للسعر.
أنت محظوظ .	إنت محظوظ.	انت محظوظ.
هل سيكون هذا المتجر مفتوحاً غداً ؟	راح يكون هاظ المحل فاتح بكرا؟	هاظ المحل رح يكون فاتح بكرة؟
وصلت الفاتورة لمائة دولار .	وصلت الفاتورة لمية دولار.	وصلت الفاتورة لمية دولار.
هل هذا مكتب الاستقبال ؟ هل يوجد عيادة قريبة ؟	هاظ مكتب الاستقبال؟ في عيادة قريبة من هون؟	هاظ مكتب الاستقبال؟ فيه عيادة قريبة؟
كم عمر ابنتك ؟	قديش عمر بنتك؟	قديش عمر ابنتك؟
لن ينضم للجولة الاختيارية إلا القليل من الناس .	ما رح ينضم للجولة الاختيارية غير شوي من الناس.	ما رح ينضم للجولة الاختيارية إلا القليل.
إنها مجرد هدية تعبيرا عن تقديري .	هاي مجرد هدية تعبير عن تقديري.	هي هدية تعبير عن تقديري.
تحتاج لرؤية أخصائي .	بتحتاج تشوف دكتور متخصص.	بدك تشوف دكتور.
كم تكلّف هي لكل جالون ؟	كم سعر الغلون الواحد؟	قديش بتكلف هي لكل جالون؟
أيمكنني الحصول على جدول زمني ، من فضلك ؟	ممكن أحصل على جدول الوقت، لو سمحت؟	ممكن أجيب جدول زمني، لو سمحت؟
لقد سُرقت حقيبتي .	انسرقت شنتتي.	انسرقت شنتتي.
نستخدم الأعواد عندما نأكل .	بنستعمل العيدان لما بنوكل.	بنستخدم العناقيد لما نأكل.
حسناً ، في حالة إصرار كليكما , سأذهب معكما .	طيب، اذا انتو الاثنين مصرين، أني راح اروح معكو.	تمام، لو أصر كل واحد منكما، رح أروح معكما.
في أي محطة سأنزل للذهاب إلى مبنى إمباير ستيت ؟	بأي موقف لازم انزل عشان أروح على عمارة امباير ستيت؟	بأي محطة رح أنزل عشان أروح على مبنى إمباير ستيت؟
لابد أن تأخذها تسعة وتسعون مرة في اليوم ، قبل الوجبات .	لازم تاخذها تسعة وتسعين مرة باليوم، قبل الأكل.	لازم تجيبها تسعة وتسعين مره باليوم ، قبل الاكل.
لا يا سيدي . هذه الظهيرة محجوزة بالكامل . ومع ذلك يمكن أن تحجز غدا .	لا، يا أستاذ، اليوم بعد الظهر كله محجوز. لكن بتقدر تحجز بكرا .	لا يا سيدي. هاي الظهيرة محجوزة بالكامل. بس بتقدر تحجز بكرا.
هل هناك طبيب للفندق أو واحد على صلة بالفندق .	في دكتور للفندق أو واحد ع علاقة بالفندق؟	في دكتور للفندق أو واحد على صلة بالفندق.
المياه الساخنة ليست ساخنة بالقدر الكافي .	المية الحامية مش حامية بشكل كافي.	المي الساخنة مش ساخنة كثير.
هل استرحت في نومك ؟	ارتحت بالنومة؟	خلصت من نومك؟
أريد إعادة المال . هل يمكن أن أحصل على مالي ؟	بدي أرجع المصاري. بقدر أوخذ مصرياتي؟	بدي أرجع المال. بقدر اخد مالي؟
انها باتجاه الجنوب .	هي باتجاه الجنوب.	هيه باتجاه الجنوب.
ما سعر تذكرة درجة أولى إلى إدنبره , من فضلك ؟	كم سعر تذكرة درجة أولى لإدنبره , إذا تكرمت.	قديش سعر تذكرة درجة أولى لإدنبره, لو سمحت؟
عندي قشعريرة .	عندي قشعيرية.	عندي قشعريرة.
لماذا , شكرا جزيلا . هل أستطيع الارتقاء للقمة ؟	ليش، شكراً كثير الك. بقدر اطلع للقمة؟	ليش, شكرا كثير. بقدر أصعد للقمة ؟
لا . هل تحب الإبلاغ عنه ؟	لا . بدك تبلغ عنو ؟	لا. بتحب تخبر عنه؟
من فضلك غير هذه الينات إلى جنيهات .	لو سمحت اصرفلي هظول من ين لقنيه.	لو سمحت غير هاي الينات لجنيهات.
سآخذ مقاعد درجة رجال أعمال ، أليس كذلك ؟	راح آخد مقاعد درجة رجال الأعمال، صح؟	راح آخذ مقاعد درجة رجال الأعمال، صح؟
لا أستطيع أن أفعل ذلك , لكني سوف أضعها في الحقيبة لك .	ما بقدر اعمل هيك , بس رح احطها بالشنتة الك .	مش قادر أعمل هيك, بس رح أحطها بالشنطة الي.
إنه غالي الثمن إلى حد ما . ألا يمكنك منحي خصماً ؟	هاد كثير غالي. ما فيك تعطيني شوية خصم؟	هاظ غالي شوي. بتقدر تعطيني خصم؟
إن " السنة " متقلقلة .	ال"سنة" عم تتقلب.	السنة "مقلقة".
سيكون جاهزا بعد غد في المساء .	راح يكون جاهز بعد بكرا المسا.	رح يكون جاهز بكرة المسا.
هل ليدكم صناديق لإرسال الطرود ؟	عندكم علب لارسال الطرود ؟	في عندكو صناديق لإرسال الطرود؟
إن عثرت على شيء ، اتصل بي من فضلك .	لو لقيت إشي، رنلي إذا تكرمت.	اذا لقيت اشي ، رنلي لو سمحت.
أود تقصيره ببوصة واحدة من هذه المنطقة .	بدي اقصّره بوسطة وحدة من هادي المنطقة.	بدي أقصه ببوصة وحدة من هاي المنطقة.
هل لديكم أي خبز ؟	عندكم خبز؟	عندكم خبز؟
أود بعض البيجامات .	بدي بيجامات.	بدي شوية جاكيتات.
أين يمكنني طباعة الفيلم ؟	وين بقدر أطبع الفلم؟	وين بقدر اطبع الفلم؟
أيمكنك الحضور إلى هنا لإصلاحه ؟	ممكن تيجي هون عشان اتصلحه؟	ممكن تروح هون تصلحه؟
أين يمكنني أن أستقل حافلة لمشاهدة المعالم ؟	من وين ممكن اركب باص لحتى اتفرج ع المعالم؟	وين بقدر أركب باص عشان أشوف المعالم؟
مرحبا يا سيدة ياماجوتشي ؟ فريقك على الخط . قبلت دعوتك . استمر من فضلك .	أهلا وسهلا يا سيدة ياماجوتشي، فريقك عم يكلمك. رديت على دعوتك. استمري، من فضلك.	مرحبا يا سيدة ياماجوتشي؟ فريقك على الخط. وافقت على دعوتك.
هل لك أن تساعدني في الوصول إلى حقيبتي ؟	ممكن تساعدني ألاقي شنتيتي؟	ممكن تساعدني أوصل شنطتي؟
آسف لقد نفذ هذا الصنف لدينا .	معذرة، هاد النوع خلص عنا.	آسف، خلص هاظ الصنف عنا.
ما اسم الشخص الذي تود التحدث إليه ؟	شو اسم الشخص اللي بدك تحكي معه؟	شو اسم الشخص يلي بدك تحكي معه؟
لقد اجتزت هذا الاختبار بنجاح كبير .	عديت الامتحان بنجاح كبير .	اجيت هاد الاختبار بنجاح كبير.
طبقاً لتقرير الطقس ، فإن غداً سيشهد سقوط جليد .	بناءً على النشرة الجوية، راح تثلج بكرا.	حسب تقرير الطقس، اليوم رح يكون جليد.
لا أستطيع ضبط اللوحة .	مش قادر أزبط الصورة.	مش قادر أضبط اللوحة.
لا زالت غالية جدا . هل من الممكن أن آخذها بثلاثة دولارات ؟	بعدها غالية كثير. ممكن أشتريها بـثلث دولارات؟	ما زالت غالية كثير. ممكن آخذها بثلاث دولارات؟
نريد اثنين هامبورجر واثنين قهوة ، من فضلك ، نريد تناولها خارج المحل .	بدنا زوج همبرجر وزوج قهوة، لو سمحت، بدنا ناكلها برة المحل.	بدنا اثنين هامبورجر واثنين قهوة ، لو سمحت ، بدنا نأكلها برا المحل.
زدني قليلاً .	زيدني شوي.	ازيد شوي.
هل لي بشوكة أخرى ؟	بدي شوكة ثانية؟	ممكن شوكة ثانية؟
أنا هنا في مهمة إعلامية .	أنا هون بشغل إعلامي.	أنا هون بمهمة إعلامية.
إنها ليست أحدث طراز ، أليس كذلك ؟	هاي مش أحدث موديل ، صح؟	مش أحدث طراز، صح؟
أبغي بعض الأقراص المنومة .	بدي حبوب منوم.	بدي حبوب منومة.
أي حافلة تذهب إلى وسط المدينة ؟	أي باص رايح عالدوار الرئيسي؟	أي باص بروح على وسط البلد؟
أريد الذهاب إلى مركز هارفارد . هل يمكن أن تخبرني عندما نصل إلى هناك ؟	بدي اروح على مركز هارفارد. ممكن تقلي لما نوصل هناك؟	بدي أروح على مركز هارفارد. بتقدر تحكيلي لما نوصل هناك؟
أريد أن أحجز على شركة نورث وست إيرلينز على الرحلة رقم صفر ثمانية ستة في الخامس .	بدي احجز على شركة نورث وست إيرلينز على الرحلة رقم صفر ثمانية ستة بخمسة الشهر.	بدي أحجز على شركة نورث وست إيرلينز على الرحلة رقم صفر تسعة ستة ستة بالخمسة.
لقد استمتعت بالوجبة كثيراً جداً .	كثير استمتعت بالوجبة.	استمتعت بالوجبة كثير.
سيكون هناك تأخير بسيط .	راح يكون في تأخير بسيط.	رح يكون فيه تأخير بسيط.
فقط إذا كانت ملكك ، سيدي . هاها ، مزحة صغيرة .	بس اذا كانت ملكك ، يا سيدي . ههههههه، هاي مزحة صغيرة.	بس اذا كانت ملكك، سيدي. هاي مزحة صغيرة.
نستطيع أن نرتب لتنظيف غرفاتكم .	ممكن نرتب معك عشان تنظيف غرفكم.	بقدر نرتب عشان ننظف غرفكم.
وما هي المثانة ؟	وشو هي المثانة ؟	شو هي المثانة؟
لا أستطيع النوم جيداً أثناء الليل .	ما قدرت أنام مليح بالليل.	مش قادر أسكر كثير بالليل.
ما هو مستوى مهارتك في عزف الكمان ؟	شو مستواك بعزف الكمان؟	شو مستوى مهارتك بعزف الكمان؟
ما هي أكثر الأشياء التي تثير اهتمامك الآن ؟	شو أكثر الأشياء اللي بتلفت انتباهك هسا ؟	شو أكثر اشياء بتحبها هسا؟
اجعل قصة الشعر تتدلى لأسفل , من فضلك .	خلي قصة الشعر تنزل لتحت، لو سمحت.	حط قص الشعر عالسطح, لو سمحت.
هل لك أن تستدعي لي سيارة أجرة الساعة الثامنة صباح غد ؟	ممكن تجيبلي تكسي بكرا الساعة ثمنية الصبح؟	ممكن تناديلي تكسي الساعة ثمانية الصبح بكرة؟
هلا ملأت هذا النموذج ؟	ممكن تعبي هاذ النموذج؟	ممكن تعبئ هاي النموذج؟
أيمكنك الانتهاء من ذلك بعد عشر دقائق ؟	بتقدر تخلص هاي بعد عشر دقايق؟	بتقدر تخلص منه بعد عشر دقايق؟
الملح من فضلك .	الملح لو سمحت.	الملح لو سمحت.
لقد نمت و لم أتيقظ حين رن منبه السادسة و النصف .	نمت و ما صحيت ع منبه الساعة ستة ونص.	نامت و ما نمت لما رن منبه الستة و النصف.
نحن من أكبر موردي أجهزة الميكروكومبيوتر .	إحنا من أكبر موردين لأجهزة الميكرو كمبيوتر .	إحنا من أكبر موردي الميكروكومبيوتر.
من فضلك أخبرني كيف أملأ بطاقة النزول إلى البر ؟	لو سمحت قلي كيف أعبي بطاقة النزول للبر؟	لو سمحت، قلي كيف أغسل بطاقة النزول للبر؟
دجاج محمر ، من فضلك .	دجاج مشوي، لو سمحت.	الدجاج محمر، لو سمحت.
أجل ، ولكن هذا كثير جدا ، ولقد شبعت بالفعل .	أيوة، بس هاي كتير كثير ، وأنا صرت أكلت كفاية.	اه ، بس هاظ كثير ، و شبعت فعلا.
لقد أُغلق علي الباب . هل يمكن أن تفتح بابي , من فضلك ؟	ييي تسكر علي الباب . بتقدر تفتحلي الباب، لو سمحت؟	انفتح علي الباب. بتقدر تفتحلي بابي، لو سمحت؟
بكل تأكيد . سنكون سعداء لفعل هذا .	أكيد. راح نكون مبسوطين نعمل هيك.	أكيد. رح نكون سعداء بعمل هاد.
يقولون إن الأنفلونزا منتشرة هناك .	بيقولوا انو الإنفلونزا معمية هنيك.	بقولوا إن الأنفلونزا منتشرة هناك.
هل ستدفع شركة الطيران رسوم الفندق والوجبات ؟	رح تدفع شركة الطيران رسوم الفندق والوجبات؟	رح تدفع شركة الطيران رسوم الفندق والوجبات؟
نسيت تذكرة الطيران الخاصة بي في الفندق .	نسيت تذكرة الطيارة قيتي بالفندق.	نسيت تذكرة الطيران الخاصة بي بالفندق.
هل يمكن أن احصل على احدى المجلات أو شيئ من هذا القبيل ؟	ممكن أوخذ وحدة من المجلات أو شي زي هيك؟	ممكن أجيب مجلة أو اشي من هيك؟
تناسبني تماما .	مناسبيتني كثير.	بتتناسبني كثير.
خذني إلى المستشفى .	خذني على المستشفى.	خذني على المستشفى.
ربما كان يعاني سّدَّة تنفسية .	ممكن عنده صعوبة بالتنفس.	ممكن كان عنده ضيق تنفس.
كم تكلفة الذهاب إلى فندق سي ؟	قديش بتكلف الروحة لفندق سي؟	قديش بتكلف الروحة لفندق سي؟
هل هناك أي غرف خالية في عربة النوم ؟	ظل في أي غرف فاظية بعرباية النوم؟	في غرف مش فاضية بالعرباية النوم؟
هل يوجد بوتيك قريب من هنا ؟	في بوتيك قريب من هون؟	في بوتيك قريب من هون؟
عندما أرى الأسعار بهذا الرخص ، يبدو الأمر سخيفاً أن أشتري أي شيء في اليابان .	لما أشوف الأسعار بهالرخص ، بحس أنه مسخرة الواحد يشتري أي شي باليابان.	لما بشوف الأسعار هاي بالرخص، شكله الموضوع كويس أني أشتري أي اشي باليابان.
لم يخرج من الماكينة شيء .	ما طلع من الماكينة إشي.	ما خرج من الماكينة اشي.
كم كان ثمنها ؟	قديش كان حقها ؟	قديش سعرها؟
أريد هدية بمناسبة الذكرى السنوية .	بدي هدية لمناسبة الذكرى السنوية.	بدي هدية بمناسبة الذكرى السنوية.
علي أن ألحق طائرة متجهة للوس أنجليس باكر صباح غد .	لازم ألحق طيارة لوس أنجلوس بكرا الصبح بكير.	لازم ألحق طيارة رايحة على لوس أنجلوس بكرا الصبح.
يا صاح , أتعرف أي مكان يستحق الرؤية قريبا من هنا ؟	أخوي، بتعرف أي مكان محرز الشوفة قريب من هون؟	يا صاح, بتعرف أي مكان بستحق الرؤية قريب من هون ؟
عندي الكثير من الوقت .	عندي وايد وقت.	عندي شوية وقت.
من أين يمكنني شراء بعض الهدايا التذكارية ؟	منين بقدر أشتري شوية هدايا تذكارية ؟	من وين بقدر اشتري شوية هدايا تذكارية؟
أنظر إلى هذا . انظر إلى هذا . سوف تخبرني أن الاختلاف بين هذا الشاب وذلك الشاب هو الحظ ؟ محمد ، يقف بالسيارة في جانب الطريق ، وأنت ؟ لن تمانع في أن أنام معك هنا . أنا متأخر . كان لقاء جميل معك ؟	شوف هاظ. شوف هاظ. راح تحكيلي انو الفرق بين هالشب وهذاك الشب هو الحظ؟ محمد، واقف بالسيارة على زقاق الشارع، وإنت؟ ما راح تعترض اذا قعدت معك هون. انا تأخرت. كان لقاء حلو معك؟	شوف هاظ. شوف هاظ. شوف هاظ الشاب و هاظ الشاب. رح تحكيلي انو التشابه بين هاظ الشاب و هاظ الشاب. بتعرف انو هاظ الشاب و هاظ الشاب. رح تحكيلي انو هاظ الشاب و هاظ الشاب. شوف هاظ. شوف هاظ. شوف هاظ. شوف هاظ. شوف هاظ. شوف هاظ. شوف هاظ. شوف هاذ الشاب هاذ الشاب هاظ.
أعمل في شركة تجارية .	أني بشتغل بشركة تجارية.	بشتغل بشركة تجارية.
أفهم ، لكن لا أستطيع أن أقولها .	فاهم، بس بقدر أقولها.	فهمت ، بس مش قادر أحكيها.
نصف زجاجة , من فضلك .	نص قنينة ، لو سمحت.	نصف قنينة, لو سمحت.
متى تقام مباراة كرة القدم ؟	متى بتبلش مباراة كرة القدم؟	متى رح تصير مباراة كرة القدم ؟
ما هو متوسط أسعاركم للفاكس الدولي كل شهر ؟	كم معدل تكلفة الفاكس الدولي كل شهر؟	شو سعر الفاكس الدولي كل شهر؟
انتظر دقيقة من فضلك .	استنى دقيقة لو سمحت.	استنى دقيقة لو سمحت.
هل هو محجوز بالكامل ؟	هو محجوز كله؟	هو محجوز بالكامل؟
شيء خطأ مع حقيبتك .	اشي غلط بشنتك .	اشي غلط مع شنتتك.
كلا منا يريد أن يحاسب على وجبته .	إحنا كل واحد بدو يدفع عن أكلته.	كل واحد بده يحاسب على وجبته.
ألم تتلق الاستمارة بالطائرة ؟	ما أخذت الاستمارة بالطيارة؟	ما رح تستلم الاستمارة بالطيارة؟
هل لديك أي شيء لفترة أطول قليلاً ؟	عندك أي اشي لوقت أطول شوي؟	عندك إشي لفترة أطول شوي؟
أجل ، من فضلك أرسله إلى الغرفة اثنا عشر أربعة وثلاثون .	أيوه، لو سمحت وديه على الغرفة اثنعش أربعة وثلاثين.	اه ، لو سمحت ارسله للغرفة اثنعش اربعة وثلاثين.
أين البحيرة ؟	وين البحيرة؟	وين البحيرة؟
هل هناك حافلة تذهب مباشرة إلى هناك ؟	في أي باص بروح هناك مباشرة؟	في باص بروح مباشرة لهناك؟
أريد هذا الطراز لخمسة أماكن مرصعة .	بدي هاي النوعية لخمس أماكن مرصعة.	بدي هاظ الطراز لخمس أماكن مرصعة.
هل لك أن تغلف هذه كالهدية ؟	ممكن تلفلي هاي كهدية؟	ممكن تغلف هاي الهدية؟
نعم لدينا هذا ، سوف نجهزها لك .	اه موجود عنا. رح نجهزلك اياه.	اه عنا هاد، رح نجهزهالك.
هل يمكنك تبديل هذه بواحدة جديدة ؟	ممكن تبدلي هاي بوحدة جديدة؟	بتقدر تستبدل هاي بوحدة جديدة؟
عفواً . ستكون جاهزة في غضون خمس دقائق .	عفوا. رح تكون جاهزة خلال خمس دقايق.	عفواً. رح تكون جاهزة خلال خمس دقايق.
أين يمكنني أن أشتري إبريقاً ؟	من وين بقدر اشتري بريق؟	وين بقدر اشتري جرافة؟
أعتقد أن عمره أكثر من خمسين سنة .	بتوقع عمره اكثر من خمسين سنة.	بتوقع انه عمره أكثر من خمسين سنة.
أود أن أطلب , من فضلك .	بدي أطلب , بعد إذنك.	بدي أطلب, لو سمحت.
معذرة . كيف يمكنني الوصول إلى المصرف ؟	معلش، كيف بقدر أوصل للبنك؟	معلش، كيف بقدر أوصل للمصرف؟
لدي بعض الملابس للمغسلة .	عندي شوية وعية للغسيل.	عندي شوية ملابس للمغسلة.
كريمة وسكر ؟	كريمة وسكر؟	كريمة وسكر؟
هل يوجد أي قطار سريع إلى بوسطن ؟	في أي قطار سريع لبوسطن؟	في أي قطار سريع لبوسطن؟
الحجوزات في السابعة ، تحت اسم مانو .	حجوزات الساعة سبعة، بإسم مانو.	الحجوزات الساعة سبعة ، تحت اسم مانو.
أين أفضل مكان لمشاهدة المعالم ؟	وين أحسن مكان لشوفة المناظر؟	وين أحسن مكان عشان أشوف المعالم؟
هل يمكنك أن تريني كيف أضع الغاز ؟	ممكن توريني كيف أحط الغاز؟	ممكن تفرجيني كيف أحط الغاز؟
علىّ أن أذهب ، سأتصل بك لاحقاً .	أني لازم أروح. رح أحكي معك بعدين.	لازم اروح، رح احكي معك بعدين.
لا كهرباء .	ما في كهربا.	ما في كهرباء.
ثلاثون دولاراً وثمانون سنتا .	ثلاثين دولار وثمانين سنت.	ثلاثين دولار و ثمانين سنت.
هل تعرف طبيب أسنان جيد ؟	بتعرف دكتور اسنان كويس؟	بتعرف دكتور أسنان كويس؟
هل من الممكن أن أمكث في غرفتي حتى الثانية مساءً ؟	ممكن أظل بغرفتي للساعة ثنتين المسا؟	ممكن أضل بغرفةي للساعة ثلاثة المسا؟
إن حول غرفتي ضجيجا بالغا .	في ضجة كبيرة حوال غرفتي	حول غرفتي ضجيج كثير.
كم ستستغرق لكي تطلب ؟	قديش بدك يعني عشان تطلب؟	قديش بدك وقت حتى تطلب؟
معدتي تؤلمني بعد الوجبات .	معدتي بتالمني بعد الوجبات.	معدتي بتوجعني بعد الأكل.
نفضل مائدة بجوار النافذة .	بنحب طاولة جنب الشباك.	بنفضل طاولة جنب الشباك.
كنت على رحلة يونيتد إيرلاينز رقم ثمانية اثنان ثمانية .	كنت برحلة يونايتد إيرلاينز الرقم ثمانية اثنين ثمانية.	كنت على رحلة يونيتد إيرلاينز رقم تسعة اثنين ثمانية.
هل لك أن ترسم لي خريطة , من فضلك ؟	ممكن ترسملي خريطة، لو سمحت؟	ممكن ترسملي خريطة, لو سمحت؟
هل بإمكاني اللمس ؟	بقدر ألمسه؟	بقدر اللمس؟
يصعب العثور على هذا المكان . إنه في طريق ضيق يتفرع من الطريق الرئيسي .	صعب يلتقى هالمكان. هو بدخلة بتتفرع من الشارع الرئيسي.	صعب الاقي هاد المكان. هو طريق ضيق بتفرع من الطريق الرئيسي.
هلا أخذت هذه السراويل ؟	ممكن توخذ هاي البنطلونات؟	ممكن تأخذ هاي السراويل؟
حسنا . إنها تتكلف خمسة وثمانون دولارا في البريد العادي وثلاثة دولارات في التوصيل الخاص .	طيب. بتكلف خمسة وثمانين دولر بالبريد العادي وثلاث دولرات بالتوصيل الخاص.	تمام. بتكلف خمسة وتسعين دولار بالبريد العادي و ثلاثة دولارات بالوصل الخاص.
إذاً يمكنني بكل ثقة أن أزكي برج مدينة سان فرانسيسكو . فهذا يعطيك فكره عن سان فرانسيسكو .	يعني بنصحك عالأكيد ب برج مدينة سان فراسيسكو. رح يعطيك لمحة عن سان فرانسيسكو.	ممكن أزكي برج مدينة سان فرانسيسكو. هاي تعطيك فكرة عن سان فرانسيسكو.
لدي تقدير كبير للموسيقى الكلاسيكية .	كثير بقدر الموسيقى الكلاسيكية.	عندي تقدير كبير للموسيقى الكلاسيكية.
من فضلك استعمل غرفة القياس هناك .	من فضلك استخدم غرفة القياس هنيك.	لو سمحت استعمل غرفة القياس هناك.
سر في نفس الاتجاه حوالي خمس دقائق ثم لف لجهة اليسار .	امشي بنفس الاتجاه حوالي خمس دقايق و بعدين ارجع على الشمال.	سر بنفس الاتجاه تقريبا خمس دقايق بعدين لف لشمال.
هل أجعله يعاود الاتصال بك عندما يعود ؟	بتحب أخليه يرجع يرنلك بس يرجع؟	بصير اخليه يتصل معك لما يرجع؟
من المرجح أن محبا للإبداع الفني مثلك سيستمتع اللوحات الزيتية غير التقليدية وعروض الموسيقى بالشوارع .	متوقع من محب للابداع الفني مثلك راح ينبسط باللوحات الزيتية والموسيقى وعروض الموسيقى بالشوارع.	بتوقع انه محب للفن مثلك رح يستمتع باللوحات الزيتية التقليدية وعروض الموسيقى بالشوارع.
هل رشحت لي رحلة قصيرة ؟	هل اخترتلي رحلة قصيرة؟	رشحت لي رحلة قصيرة؟
إنها سبعة عشر ايه . اوه ، انا آسف . لقد أخطأت .	هي سبعتعشر ايه . اوه ، أني آسف . غلطت	هي سبعة عشر ايه. اوه ، انا آسف. غلطت.
كم المدة التي قضتها هي حتى الآن في المملكة المتحدة ؟	قديش المدة اللي عاشتها بإنجلترا؟	قديش قضتها حتى الآن بالمملكة المتحدة؟
هل قرّرتَ ؟	قررت؟	خلصت؟
هل نذهب إلى أي مكان متحدثين مثل ذلك ؟	راح نظل نحكي هيك وين ما نروح؟	نروح على أي مكان فيه ناس كتير مثل هيك؟
سأذهب كي أسأل البواب عن الأجرة المناسبة .	رايح اسأل البواب عن الأجرة الصحيحة.	راح اروح اسأل البواب عن الأجرة المناسبة.
اللون البني محبب هذا العام .	اللون البني مرغوب هالسنة.	اللون البني محبب هالسنة.
هناك قطع في بلوزتي . أتساءل هل يمكنك أن تخيطيه لي ، من فضلك ؟	في مزع ببلوزتي. بدي اسألك اذا بتقدر تخيطلي اياه، لو سمحت؟	في قطع بلوزتي. بسأل هل بتقدر تخيطلي؟ لو سمحت؟
هل هذه هي آخر محطة ؟	هاظا آخر موقف؟	هاي آخر محطة؟
هل يمكنني تركها في أي مكان من البلاد ؟	بقدر أسيبها بأي مكان بالبلد؟	بقدر اتركها بأي مكان من البلاد؟
أريد بعض التفاح ، من فضلك .	بدي شوية تفاح، لو سمحت.	بدي شوية تفاح، لو سمحت.
أخشى أن لا يكون هنا أية دورة لتعليم الجولف .	خايف ما يكون في دورة لتعليم الجولف	خايف ما يكون هون دورة لتعليم الجولف.
دعني أحول هذه المكالمة إلى المسئول .	خليني أحوّل هاي المكالمة للمسؤول.	خليني أحول هاي المكالمة للمسئول.
هل يمكن أن تحجزوا في العرض ؟	ممكن تحجزولي بالعرض؟	ممكن تحجزوا بالعرض؟
أنا أقيم في فندق هيلتون .	أنا قاعد بفندق الهلتون.	أنا ساكن بفندق هيلتون.
أحب هذه الخدمة بتقديم شامبانيا للتحية بعد الإقلاع . دعني أشرب فى صحتك .	بحب هاي خدمة توزيع شامبانيا للترحيب بعد ما نطير. خليني أشرب بصحتك.	بحب هاي الخدمة بتعطيني شامبانيا للتحية بعد ما تطير. خليني أشرب من صحتك.
ما هو الحد الأدنى للعمر لفعل ذلك ؟	إيش أقل عمر مسموح يعمل هيك؟	شو هو الحد الأدنى للعمر عشان أعمل هيك؟
إلى فندقي ، من فضلك ، إن عنوان فندقي في هذه الورقة .	للفندق تبعي، لو سمحت، العنوان تبع الفندق ع هالورقة.	ل فندقي ، لو سمحت ، عنوان فندقي بهاي الورقة.
أريد لقاء السيد ويليم .	بدي أشوف الأستاذ ويليم.	بدي أشوف السيد ويليم.
النبيذ ليس باردا بشكل كافي . هل نمكنك أن تجعله أكثر برودة ؟	الواين مش بارد كفاية. ممكن تبرده اكثر؟	النبيذ مش بارد كثير. بتقدر تحطه بارد؟
بكم هذا العطر ؟	بقديش هاظا العطر؟	بكم هاد العطر؟
بالتأكيد سوف ترسلهم ، أليس كذلك ؟	أكيد راح تبعتثم، صح؟	أكيد رح تبعثهم، صح؟
أسف ، هذا المكان محجوز بالفعل .	آسف، هاذ المكان محجوز فعلاً.	أسف ، هاظ المكان محجوز فعلا.
من فضلك أعطني بعض النقود الفكة .	لو سمحت أعطيني شوية فراطة.	لو سمحت أعطيني شوية فلوس.
لا أعرف شيئاً عن هذا الأمر .	ما بعرف إشي عن هالشغلة.	ما بعرفش إشي عن هاي القضية.
حفلتك مقامة الآن . تفضل .	حفلتك مبلشة هسا. تفظل.	حفلتك مقامة هسا. تفضل.
أخطط للبقاء لمدة اثنا عشر يوماً .	بخطط أظل اثنعشر يوم.	بدي اضل لمدة اثنعش يوم.
يوجد الكثير من السائحين بالقرب من المبنى ، ويبدو أنهم تجمعوا لإلقاء نظرة على ما يحدث .	في كتير سواح حوالين البناية، شكلهم متجمعين عشان يشوفوا شو اللي بصير.	في كثير من السياح قريب من المبنى، ويبدو انهم تجمعوا عشان يشوفوا ما بصير.
هل لك أن تقدر التكلفة قبل أن تبدأ العمل فيها ؟	ممكن تقدر قديش بكلف قبل ما تبدا شغل فيه؟	ممكن تقدر التكلفة قبل ما تبدأ العمل فيها؟
نعم . تم نقل أمتعة شخص آخر إلى غرفتي تواً . من فضلك ، هل من الممكن أن تقوم بفحصها ؟	اه، في شناتي لحدا ثاني وصلت غرفتي هسا.لو سمحت، ممكن تشوفها؟	اه. نقلوا أغراض شخص ثاني لغرفتي هسا. بتقدر تفحصها؟
أريد أن أحصل على تعويض لذلك .	أنا بدي اوخد تعويض عن هاظ.	بدي أحصل على تعويض لهاي.
بالتأكيد , كن على راحتك .	أكيد، كون على طبيعتك	أكيد, خليك على راحتك.
إن ثمة خطأ ما في بطاقة المفتاح هذه ، أعطني غيره ، من فضلك .	فيها غلطة شكلها بالكارت هاي، عطني وحدة ثانية، الله يخليك.	في غلط بهاي البطاقة هاي، أعطيني غيره، لو سمحت.
من فضلك اتصل لي برقم ثلاثة اثنان ستة اثنان تسعة واحد ثمانية .	لو سمحت، رنلي على الرقم ثلاثة اثنين ستة اثنين تسعة واحد ثمانية.	لو سمحت رنلي برقم ثلاثة اثنين ستة سبعة تسعة واحد تسعة.
أين مدخل مترو الأنفاق ؟	وين دخلة المترو؟	وين مدخل المترو؟
معذرة . ولكني أريد تسليم تقرير السرقة .	معلش، بس بدي أسلم تقرير السرقة.	عفواً. بس بدي أستلم تقرير السرقة.
هذا المقاس ، الذي تسميه المقاس العادي ، سوف تجده هنا .	هاذ الحجم ، اللي بتسميه حجم عادي، راح تلاقيه هون .	هاد القياس، اللي بتسميه القياس العادي، رح تلاقيه هون.
إنه رديء الصنع .	هو مش صنوع منيح.	هاد رديء الصنع.
هل يمكن أن تخبرني عن ساعات العمل ؟	ممكن تحكيلي عن ساعات الشغل؟	ممكن تحكيلي عن ساعات الشغل؟
اعطني شهادة طبية , من فضلك .	عطيني وصفة طبية ، لو سمحت .	اعطيني شهادة طبية, لو سمحت.
ليس معي فكة صغيرة .	ما معي فراطة.	ما معي فراطة صغيرة.
هل يمكن أن أرى هذا ؟	ممكن أشوف هاظا؟	بقدر اشوف هاظ؟
ليس لدى أي شئ لكي أعلنه .	ما عندي أي اشي عشان أعلنه.	ما عندي إشي عشان أعلنه.
أعتقد أنني تركت كاميرتي وغادرت عندما كنت أتناول العشاء هنا الليلة الماضية .	بظن اني تركت كميرتي و روحت لما كنت اكل هون امبارح عالعشا.	بظن اني تركت كاميرتي و رجعت لما كنت اتناول العشا هون الليلة الماضية.
دعنا نجتمع لنبحث الأمر أكثر .	خلينا نلتقي عشان اناقش هاظ الموضوع أكثر.	خلينا نجتمع نناقش الموضوع أكثر.
هيه ، هذا فستان جميل حقا .	مرحبا ، هاذا فعلا فسطان حلو.	هيه ، هاظ الفستان حلو كثير.
من فضلك كن صديقي بالمراسلة .	من فضلك, كون صاحبي عالتواصل.	لو سمحت كن صاحبي بالمراسلة.
أعطني خمسين ، من فضلك .	اعطيني خمسين ، إذا سمحت.	أعطيني خمسين، لو سمحت.
ما هذا المكان الذي نمر به الآن ؟	شو هالمكان اللي بنمر فيه هسا؟	شو هاظ المكان يلي نمر فيه هسا؟
هل لي في استعارة بعض البياضات ؟	ممكن أستعير شرارشف؟	ممكن أستعير شوية بياض؟
أوه , يبدو كأنه قرعة .	أوه، شكله قرعة .	أوه، شكله قرعة.
اشعر كأن هناك تحديق في . هل من النادر رؤية شخص ياباني ؟	حاسك بتسرح فيه. لهاي الدرجة قليل تشوف واحد ياباني؟	بحس انه في تحدق في. من النادر ما نشوف حدا ياباني؟
سنبعث لك بالبريد عشرين عينة إضافية .	رح نبعتلك عالبريد عشرين عينة زيادة.	رح نبعثلك عشرين عينة زيادة.
إن الرصيف رقم خمسة يقع هناك .	الرصيف رقم خمسة موجود هناك.	الرصيف رقم خمسة هو هناك.
أين يوجد مكان لطيف لقضاء نزهة ليوم واحد ؟	وين بلاقي مكان لطيف أظل فيه رحلة ليوم واحد؟	وين مكان حلو نروح فيه لرحلة ليوم واحد؟
يا سيد كاواي لدينا مائدة لك الآن . تفضل من هنا .	يا أستاذ كاواي، عنا طاولة الك حاليا. تعال من هون.	يا سيد كاواي عنا طاولة هسا. تفضل من هون.
لا توجد مشكلة . إذا حضرت في الخامس من سبتمبر ، فسيكون بإمكانك الاستمتاع بعرض فيلم علمي لأن عندنا يوماً خاصاً مفتوحاً أول يوم جمعة من كل شهر .	ما في مشكلة. اذا اجيت بخمسة تسعة ، بتقدر تستمتع بالفلم العلمي لأنه احنا عنا يوم مميز مفتوح بأول جمعة من كل شهر.	ما في مشكلة. لو حضرت يوم خمسة من شهر خمسة، رح تستمتع بعرض فيلم علمي لأنه عندنا يوم خاص أول يوم جمعة من كل شهر.
هل بإمكاني الحصول على طبق آخر مثل هذا ؟	بقدر آخذ صحن ثاني مثل هاذ؟	بقدر اخد طبق ثاني زي هاي؟
لا تهتم . على أي حال ، خذني من فضلك إلى مركز الحي الصيني . سأحاول أن أجده بنفسي .	ما تشيل هم. يلا، خذني لو سمحت لمركز الحي الصيني. راح احاول ادور الجهة وحدي.	لا تهتم. لو سمحت، خذني على مركز الحي الصيني. رح أحاول ألاقيه بنفسي.
أهه ، هيا . دولارين فقط .	اها، يلا. بس دولارين.	أه ، هيك ، هيك. دولارين بس.
سندويتشان برجر بالجبن ، من فضلك .	اثنين برجر بالجبنة، لو سمحت.	سندويتشين برجر بالجبنة، لو سمحت.
أرغب في كريم مسائي للبشرة .	بدي كريم ليلي للبشرة.	بدي كريم مسائي للبشرة.
متى سنقلع ؟	أميت راح نقلع؟	متى رح نطلع؟
هذا طيب ، على ما يبدو .	هاذ طيب ، من شكله.	هاظ كويس ، على ما يبدو.
حسنا , الوقت متأخر إلى حد ما . أعتقد أنني يجب على أن أغادر الآن . شكرا جزيلا لك على الأمسية الرائعة .	ماشي, الوقت صار متأخر شوي. بظن انو لازم اروّح هسا. كتير شكرا على الليلة الممتعة.	تمام, الوقت متأخر شوي. بتوقع انه لازم اروح هسا. شكرا الك على الأمسية الحلوة.
لقد سقطت من على درجات السلم .	وقعت من على درج السلم	سقطت من فوق السلم.
هذه السن في المقدمة تؤلمني .	هالسنة في الامام بتوجعني.	هاي السن بالأول بتوجعني.
من أي نوع من الجلد الصناعي صُنعت حقيبة السفر هذه ؟	شو نوع الجلد الاصطناعي المصنوع منه شنطة السفر هاي؟	من أي نوع من الجلد الصناعي صُنعت شنطة السفر هاي؟
أين نشأت سمكات الفراش هذه ؟	من وين جاية سمكات الفراش هاي؟	وين نشأت سمكات الفراش هاي؟
سأخطط لإرسال فواتير حاجياتي اليومية ، لذا من فضلك أخبرني العنوان و اسم الشخص المسئول من فضلك .	رح أبعث فواتير حاجاتي اليومية، عشان هيك لو سمحت أعطيني عنوان واسم الشخص المسؤول.	رح أخطط لإرسال فواتير حاجياتي اليومية، لو سمحت، اسم الشخص المسئول لو سمحت.
أريد نسخة من تقرير السرقة .	بدي نسخة من تقرير السرقة.	بدي نسخة من تقرير السرقة.
أريد السفر من شنغهاي إلى هاواي بالباخرة .	بدي أروح من شنغهاي لهاواي عالسفينة.	بدي أسافر من شنغهاي لهاواي بالباخرة.
جريدة باللغة الإنجليزية ، لطفاً .	جريدة بالانجليزي، لو سمحت.	جريدة باللغة الإنجليزية، لو سمحت.
هل هناك سيارة ليموزين ؟	في سيارة ليموزين؟	في سيارة ليموزين؟
لا أريد واحدة ضخمة .	ما بدي وحدة دفشة.	بدي وحدة كبيرة.
أريد فندقاً آمنا يقدم إفطاراً جيدا ، من فضلك ؟	بدي فندق آمن ، بقدم فطور كويس ، لو سمحت ؟	بدي فندق امن يقدم فطور كويس، لو سمحت؟
أربعة وعشرين دولاراً . هل تريد المزيد ؟	أربعة وعشرين دولار. بدك كمان؟	أربعة وعشرين دولار. بدك المزيد؟
وقعت منى الشوكة . من فضلك أحضر واحدة أخرى .	وقعت مني الشوكة. لو سمحت جبلي وحدة ثانية.	وقعت مني الشوكة. لو سمحت جيبلي وحدة ثانية.
لاحظ الفجوة ، لاحظ الفجوة ، ثم قرب الأبواب ، من فضلك .	لاحظ الفتحة، لاحظ الفتحة ، بعدين قرب الابواب، لو سمحت.	لاحظ الفجوة، لاحظ الفجوة، ثم قرب الأبواب، لو سمحت.
من فضلك ساعدني أعثر على مرشد يتحدث اليابانية .	لو سمحت ساعدني ألاقي دليل سياحي بحكي ياباني.	لو سمحت ساعدني أعثر على مرشد بحكي ياباني.
ماذا عن هذه النماذج البلاستيكة ؟	شو رأيك بموديلات البلاستك هاي؟	شو بالنسبة لهاي النماذج البلاستيكة؟
دعونا نحتفل ، هكذا قال وآخذني إلى بار . وقال إنه سيُجري مكالمة هاتفية وغادر ولم يعد أبداً وتحملت أنا وحدي عبء فاتورة ضخمة .	"خلينا تحتفل" هيك قال وأخذني على البار. حكى انه رايح يعمل مكالمة وراح وما رجع إجى أبداً وأنا تورطت بفاتورة كبيرة.	خلينا نفرح، هاي قال ورح يرنلي على بار. وحكي انه رح يرنلي ورجع ورجع ورجع ورجع ورجع ورجع ورجع ورجع ورجع ورجع ورجع ورجع ورجع ورجع ورجع ورجع ورجع ورجع ورجع ورجع ورجع ورجع ورجع ورجع ورجع ورجع ورجع ورجع ورجع ورجع ورجع ورجع ورجع ورجع ورجع ورجع ورجع ورجع ورجع ورجع ورجع ورجع ورجع ورجع ورجع وخلينا نفرح ، هاي قال ورح يلا هاك
أرغب في خلع أسناني .	أنا حاب أقلع سناني.	بدي أخلع أسناني.
أريد منبه ، من فضلك .	بدي منبه، لو سمحت.	بدي منبه، لو سمحت.
ما توقيت إجراءات مغادرة الفندق ؟	متى منقدر نعمل الاجراءات حتى نطلع من الفندق؟	شو توقيت خروج الفندق؟
أريد أن أحصل على استراحة .	بدي أوخذ بريك.	بدي أجيب استراحة.
هذه الغرفة اثنان صفر واحد . أريد أن أطلب إفطار الغد .	هاي الغرفة رقم اثنين صفر واحد. بدي أطلب فطور بكرا.	هاي الغرفة اثنين صفر واحد. بدي أطلب الفطور بكرا.
هل هذا مصنوع من القطن ؟	هاذ مصنوع من القطن؟	هاظ مصنوع من القطن؟
ما هو مقدار الرسوم للوزن الزائد ؟	قديش الدفع على الوزن الزايد؟	قديش الرسوم للوزن الزائد؟
لدي معداتي الخاصة .	عندي أدواتي الخاصة.	عندي معداتي الخاصة.
في غرفة انتظار بالمحطة .	في غرفة انتظار بالمحطة.	بغرفة انتظار بالمحطة.
كيف أستطيع مساعدتك ؟	كيف بقدر اساعدك ؟	كيف بقدر أساعدك؟
ادخل . من فضلك ضعها على المائدة هناك .	أدخل. لو سمحت حطها على الطاولة هنيك.	ادخل. لو سمحت حطها على الطاولة هناك.
حسناً . سأتأكد أن حقائبك ستكون هنا .	طيب . راح أتأكد إنه الشناتي رح تكون هون.	تمام. رح اتأكد ان الشناتي رح تكون هون.
سنأتي في السابعة .	رح نيجي الساعة سبعة.	رح نيجي الساعة سبعة.
حقاً . اليوم هو الأحد ، والأحد هو أسوء الأيام .	فعلاً. اليوم الأحد، والأحد أسوأ الأيام.	جد. اليوم هو الأحد، والأحد هو أسوء الأيام.
إما أن تصلحها أو تستبدلها ، من فضلك .	يا تصلحها يا تبدلها، لو سمحت.	بتقدر تصلحها أو تستبدلها، لو سمحت.
ربما أعطيك إجابة أفضل من تلك بعد عرضين .	يمكن أعطيك جواب أحسن من هاذ بعد ما أشوفه مرتين.	ممكن أعطيك إجابة أحسن من هاي بعد عرضين.
إن ارتفاعه ألفان وأربعمائة متر .	إنو ارتفاعه ألفين وأربعمية متر.	ارتفاعه ألفين و أربعمية متر.
هل يمكن أن أستعيد متعلقات ؟	ممكن أرجع متعلقاتي؟	بقدر ارجع أغراضي؟
هل بإمكاني إجراء طلبية ؟	بقدر اطلب؟	بقدر اعمل طلبية؟
إنه خطئي . ليس خطأك .	هاي غلطتي. مش غلطتك.	هاذ غلطي. مش غلطك.
لا يوجد أي منها .	ما في منهم.	ما فيش منها.
أريد غرفة بمنظر جميل .	بدي غرفة مع إطلالة حلوة.	بدي غرفة ب منظر حلو.
أنا ياباني .	أني ياباني.	أنا ياباني.
هل لديكم دبابيس زينة ذات تصميمات رائعة ؟	عندك بروشات شكلها حلو؟	عندكم دبابيس زينة جميلة؟
يبدوا أنني غير قادر على الحصول على الماء الساخن .	شكله مش قادر يجيب ميّة ساخنة.	شكله مش قادر اجيب مي ساخنة.
هلا وقفت معي لالتقاط صورة ؟	بتقدر توقف معي شوي عشان نصور صورة؟	ممكن تقف معي تلتقط صورة؟
لا أعتقد أن ذلك يناسبني فجلدي جاف إلى حد ما .	ما بعتقد انه هاد بلبقلي، جلدي ناشف كثير.	ما بتوقع انه هاظ يناسبني.
أكون ممتنا جدا لو أخذتني إلى الشاطئ .	راح أكون كثير ممنون لو توخذني لعند الشط.	أكون مبسوط كثير لو أخذتني على البحر.
هل يمكنني الحصول على تذكرتين درجة ثانية لشيكاغوا , من فضلك ؟	ممكن أحجز تذكرتين لشيكاغو من الدرجة الثانية، لو سمحت؟	ممكن أجيب تذكرتين درجة ثانية لشيكاغوا, لو سمحت؟
أجل ، أنا . لقد كانوا يعيشون بجواري في كاليفورنيا لكنهم انتقلوا إلى فلوريدا منذ عامين . ماذا عنك ؟ هل تسافر بمفردك ؟	أيوه، أنا. كانوا عايشين بحدي بكاليفورنيا بس انتقلوا على فلوريدا من سنتين. شو بالنسبة الك؟ بتسافر لحالك؟	اه ، أنا. كانوا معي ب كاليفورنيا بس انتقلوا لفلوريدا من سنتين. شو بالنسبة لك ؟ بتسافر لوحده ؟
أنا من طوكيو .	أني من طوكيو.	أنا من طوكيو.
أي منتجات صوفية أخرى ؟	في منتجات صوف ثانية؟	أي منتجات صوفية ثانية؟
هل من الممكن أن تخبرنا كيف تقيم هذه الخطة ؟	ممكن تحكيلنا كيف بتعمل هاي الخطة ؟	ممكن تحكيلي كيف تقيم هاي الخطة؟
مساء الخير . أهلا .	مسا الخير. أهلين.	مسا الخير. أهلا.
اخرج من ذلك الباب ، وانتظر عند المحطة رقم ستة .	طلع من هاي الباب، و انطر عند المحطة رقم ستة.	اروح من هاد الباب، و اقعد عند المحطة رقم ستة.
سبعاً ، من فضلك .	سبعة، لو سمحت.	سبعه ، لو سمحت.
مهزوز ، وليس مضروب .	محرك، مش مخفوق.	مهزوز ، مش مضروب.
ثلاثة أيام .	ثلاث أيام.	ثلاث أيام.
تريد أن تشتري ثوبا .	هي بدها تشتري فسطان.	بدك تشتري ثوب.
لا ، ليس بعد ، هناك الكثير نختار فيه .	لا، بعده ، في كثير عشان تنقي منه	لا، ما بعده، في كثير بنختار فيه.
سر في خط مستقيم على طول النهر حوالي نصف ميل . ستصل للمتنزه .	إمشي دغري على طول النهر حوالي نص ميل. بتصل المنتزه.	امشي بخط مستقيم على طول النهر حوالي نصف ميل. توصل للمتنزه.
أسف أنني بحاجة إلى أن أطلع على أي مستند لتحديد الهوية .	أسف أني بحاجة إني أشوف اثبات هوية.	أسف أني بدي أشوف أي مستند لتحديد الهوية.
كن حذراً ، السقف منخفض .	انتبه ، السقف واطي.	كن حذر، السقف منخفض.
كم تتقاضى لتطبيع صور الفيلم ؟	قديش بتوخذ عشان تطبع صور الفلم؟	قديش بتوخذ لتطبيع صور الفلم؟
هل يدخل هذا في حدود المعفي من الضرائب ؟	هاظ معفي من الضرايب؟	هاظ بدخل ضمن المعفي من الضرايب؟
غرفة مفردة بدون دش من فضلك .	غرفة مفردة بدون دش لو سمحت .	غرفة منفردة بدون دوش لو سمحت.
هل يمكن أن تدلّني أين أجد القنصلية اليابانية ؟	ممكن تحكيلي وين بقدر ألاقي القنصلية اليابانية؟	بتقدر تدلني وين السفارة اليابانية؟
من فضلك ضعها في قمع .	لو سمحت حطها ببوري.	لو سمحت حطها بقمع.
نصف أوقية من شانيل رقم خمسة من فضلك .	نص أوقية من شانيل رقم خمسة، لو سمحت.	نصف أوقية شانيل رقم خمسة لو سمحت.
شخصان .	شخصين.	شخصين.
هل تعرف ما إذا كان هناك أي فنادق رخيصة الأسعار ؟	بتعرف اذا في أي فنادق رخيصة؟	بتعرف اذا في فنادق رخيصة؟
أريد أن أقدم طلباً للحصول على إصدار جديد .	بدي أقدم طلب مشان اخد إصدار جديد.	بدي أقدم طلب للحصول على إصدار جديد.
أريد بزة .	بدي سترة.	بدي جاكيت.
هذا مكلف نوعا ما .	هاي بتكلف شوي.	هاظ مكلف شوي.
لقد طلبت لحما لا سمكا . هل يمكنك تغيير هذا ؟	طلبت لحم مش سمك. ممكن تغير هاي؟	طلبت لحمة مش سمك. بتقدر تغير هاد؟
عذراً . هل يوجد محل كتب قريب من هنا ؟	عفواً . في مكتبة بتبيع كتب قريب من هون ؟	اسف. في محل كتب قريب من هون؟
حينئذ سنأخذها .	بهالوقت رح نوخذها.	رح نخليها.
إنه بعيد جداً . يحسن بك أن تأخذ سيارة أجرة .	هو بعيد كتير. فضل أكيد تاخذ تكسي.	هو بعيد كثير. بتقدر تاخد تاكسي.
في أي وقت نبدأ ؟	على أي ساعة راح نبلش؟	بأي وقت رح نبلش؟
حسناً . لقد تم التأكيد . هل يمكننا أن نأخذ رقم تليفونك في حالة الحاجة إلى الاتصال بك ؟	ماشي، اتأكدت . بنقدر نوخذ رقمك تلفونك في حال احتجنا نتصل فيك؟	تمام. تأكدت. بنقدر نخد رقم تلفونك لو بدنا نرن عليك ؟
حسنا . خصم خمسة في المائة . هل يوافقك لك ؟	ماشي ، خصم خمسة بالمية. بمشي معك؟	تمام. خصم خمسة بالمية. بوافقك ؟
الآن ، مكالمتك ردت . تفضل من فضلك .	حاليا، مكالمتك رجعت. تفضل لو سمحت.	هسا، مكالمتك ردت. تفضل لو سمحت.
أوه ، أهي كذلك ؟ كيف تفضلها ؟	أووه، هي هيك؟ كيف بتحبها؟	أوه، هي هي هي؟ كيف بتحبها؟
أنا فقدت أثر بريد مسجّل .	ضيعت أثر رسالة مسجلة.	أنا ضيعت أثر بريد مسجل.
لا أشعر بحالة جيدة . هل ترشدني إلى طبيب ؟	ما بحس حالي ملبح. ممكن ادلني على دكتور؟	ما بحس بتحسن. بتدلني على دكتور؟
هل أنت ملم بجغرافيا اليابان ؟	إنت ملم بتظاريس اليابان؟	انت ملم بخريطه اليابان؟
لا أستطيع رؤية الشاشة جيداً من هنا ، هل يمكنني تبديل المقاعد لبعض الوقت ؟	أنا مش قادر أشوف الشاشة مليح من هون. ممكن نبدل المقاعد شوي؟	مش قادر أشوف الشاشة من هون، بقدر أغير الكراسي شوي؟
سعر الغرفة هو ستة آلاف ين في الليلة .	سعر الغرفة ست آلاف ين لليلة.	سعر الغرفة ستة آلاف ين بالليلة.
أعتقد أن سيارتي تستحق حوالي خمسة آلاف دولارا .	أنا بتوقع سيارتي بتسوى حوالي خمس الآف دولار.	بتوقع سيارتي بستحق حوالي خمسة آلاف دولار.
أين حديقة الحيوان ؟	وين حديقة الحيوانات؟	وين حديقة الحيوان؟
هي تريد بيرة .	هي بدها بيرا .	هي بدها بيرة.
هل هذه الحقيبة مناسبة لكل حالات الطقس ؟	هاي الشنتة بتناسب كل حالات الجو؟	هاي الشنتة مناسبة لكل حالات الطقس؟
أفضل شيء هو اسطوانة مصغرة .	أحسن اشي هو سي دي صغير.	أحسن اشي هو اسطوانة مصغرة.
فهمت ، في هذه الحالة ليس علىّ أن أدفع أجر التبديلات ، أليس كذلك ؟	فهمت، بهاي الحالة ما عليي أدفع فلوس التبديلات، مش هيك؟	فهمت، بهاي الحالة ما لازم أدفع أجر التبديلات، صح؟
هل يمكنك أن تريني حجماً أكبر بقليل ؟	ممكن توريني سايز اكبر شوي؟	ممكن تفرجيني حجم أكبر شوي؟
هل يمكنك بطريقة ما أن تصف لي مرضك بالإنجليزية ؟	بتقدر بأي طريقة تشرحلي مرضك بالإنجليزي؟	بتقدر تحكيلي مرضك بالانجليزي؟
انتقلنا إلى هذا المنزل منذ عام .	رحلنا لهاظ البيت من سنة.	انتقلنا على هاد المنزل من عام.
معذرة ، هل يسعني أن أتوجه إليك بسؤال ؟	معلش، بقدر أوجهلك سؤال؟	عفواً، بقدر أروح عليك بسؤال؟
هذا سعر مرتفع ، أليس كذلك ؟	هاظا سعره غالي، صح؟	هاظ السعر مرتفع ، صح ؟
نعم ، ولكن تأكد أن تذكرتك معك .	ايوه، بس تأكد إنه تذكرتك معك.	اه ، بس تأكد ان تذكرتك معك.
ما رأيك في موضوع التحرش الجنسي في مكان العمل ؟	شو رأيك بالتحرشات الجنسية اللي بتصير بمكان الشغل؟	شو رأيك بالموضوع التحرش الجنسي بمكان العمل؟
أريد تذكرتين ذهاب وعودة إلى أكسفورد .	بدي تذكرتين روحة رجعة على أكسفورد.	بدي تذكرتين روحة ورجعة على أكسفورد.
هل ستذهب إلى المدرسة هنا ؟	رح تروح عالمدرسة هون؟	بدك تروح على المدرسة هون؟
أود بعضاً من فيلم رقم ايه إس ايه لهذه الكاميرا ، من فضلك .	بدي فيلم رقم ايه إس ايه لهاي الكميرا، لو سمحت.	بدي شوية فلم رقم ايه إس ايه لهاي الكاميرا، لو سمحت.
أصبت بسحجة .	أني انشخطت.	صابتني زلة.
أريد تسجيل أمتعتي .	بدي أسجل شنطي.	بدي أسجل شناتيي.
أريد أن أرى ذاك الذي في نافذة العرض ، من فضلك .	بدي أشوف هاذ الموجود بالواجهة، لو سمحت.	بدي أشوف هاد اللي بواجهة العرض، لو سمحت.
ما هي المحتويات ؟	شو المكونات؟	شو المحتويات؟
لقد تعطلت سيارتي . من فضلك احضر لتأخذها .	سيارتي خربت. تعال خذها لو سمحت.	ضيعت سيارتي. لو سمحت جيبها.
ما النمط الذي في مخيلتك ؟	شو النمط اللي بخيالك؟	شو النمط اللي بتصوره؟
كيف تسير الأمور ؟	كيف ماشية الأمور؟	شلون تسير الأمور؟
ألا تسأله أن يتصل بي ؟	بتقدر تحكيله يتصل فيّ؟	ما تسأله يتصل بي؟
ما الغرض منها ؟	شو الهدف منها؟	شو غرضها؟
كيف يربي الآباء اليابانيون أولادهم ؟ هل هم صارمون مع أطفالهم ؟	كيف بيربو الآباء اليابانيين ولادهم؟ همة شديدين مع عيالهم؟	كيف بربي الآباء اليابانيين أولادهم؟ هم صارمين مع أولادهم؟
هلا ضغطت على زر مصراع النافذة ؟	ممكن تكبس كبسة الشباك؟	ممكن تضغط على زر المظلة؟
أيمكنني أن أذهب هناك بمترو الأنفاق ؟	بقدر أروح هناك بالمترو؟	بقدر اروح هناك بالمترو؟
دعنا نشاهد التلفزيون . فيها مباراة بيسبول .	خلينا نتفرج على التلفزيون. في مباراة بيسبول.	خلينا نشوف التلفزيون. فيها مباراة بيسبول.
حسناً . خذ هذا الاتجاه . من فضلك ، سأوصلك إلى غرفتك .	ماشي، خذ هاي الطريقة. لو سمحت، رح أوصلك لغرفتك.	تمام. خذ هاد الاتجاه. لو سمحت ، رح أوصلك على غرفتك.
أريد تمويج متقارب لشعري ، من فضلك .	بدي أعمل شعري كيرلي ، لو سمحت.	بدي تمويج متقارب لشعري، لو سمحت.
نريد مائدة في الشرفة .	بدنا طاولة على البرندة.	بدنا طاولة بالشرفة.
معدتي ثقيلة .	معدتي كبيرة.	معدتي ثقيلة.
أعد ذلك , من فضلك .	عيدها، لو سمحت.	اعملها, لو سمحت.
سآخذ صورة لجاك دانيلز .	راح آخذ صورة لجاك دانيلز.	رح آخذ صورة لجاك دانيلز.
هل لديكم أطباق ذات سعرات حرارية منخفضة ؟ فأنا أتبع نظاما غذائياً حالياً .	عندكو وجبات قليلة الكالوريز ؟ أنا ماشية بدايت هالأيام.	عندكم أكلات سعراتها حرارية منخفضة؟ أنا بتبع نظام غذائي هسا.
ما هي الفوارق بين هذه الفنادق ؟	شو الفرق بين هاي الفنادق؟	شو الفوارق بين هاي الفنادق؟
لم أقم بالحجز .	ما عملت حجز.	ما حجزت.
هل لديك أية فكة لعداد الانتظار ؟	عندك عملة للبارك ميتر؟	عندك فكة لعداد الانتظار؟
أيهما تفضل , داكن أم فاتح ؟	شو بتحب أكثر, غامق أو فاتح؟	شو بتحب, داكن ولا فاتح ؟
حسناً سيدي . وما الحلو الذي تريد أن تختم به الطعام ؟	طيب يا استاذي.. شو الحلو اللي بدك تختم فيه الأكل ؟	تمام سيدي. شو الحلو اللي بدك تختم بهالأكل؟
إنني أسجل لخروجي من الفندق . هلا أرسلت خادماً إلى أعلى ؟	أني بعمل تشيك اوت. ممكن تودي عامل لفوق؟	أنا بسجل خروجي من الفندق. ممكن تبعثلي خادم عالأعلى؟
كيف يمكنني الذهاب إلى ديزني لاند ؟	شلون بقدر أروح على ديزني لاند؟	كيف بقدر اروح على ديزني لاند؟
الآن ، هذه اللوحة خاصة جداً . رسمها تسوروتارو كاتاأوكا . إنه معروف بأنه فنان عالمي .	هسا، هاي اللوحة كثير مميزة. رسمها تسوروتارو كاتاأوكا. معروف هاذ فنان عالمي.	هسا، هاي اللوحة خاصة كثير. رسمها تسوروتارو كاتاأوكا. معروف انه فنان عالمي.
هذه المظلة يمكن استخدامها كعصا للسير .	هاي الشمسية بقدر استخدمها كعصاية.	هاي المظلة ممكن تستخدم كعصا للسير.
لأن الصيف في اليابان عادة ما يكون شديد الحرارة ، ولم يكن لدينا تكييف هواء قديماً .	لأنه الصيف باليابان عادة بكون حامي كثير، وما كان عندنا مكيف هوا زمان.	الصيف باليابان كثير حار، ما كان عندنا تكييف قديماً.
الشيء نفسه لي ، من فضلك .	ونفس الشي إلي ، لو سمحت.	هاظ هو الي، لو سمحت.
يوم الصحة الرياضية هو يوم العاشر من أكتوبر وهو إجازة قومية الغرض منها تحسين صحة المواطنين .	يوم الصحة الرياضية بعشرة عشرة بكون عطلة وطنية عملوه عشان يرفعوا مستوى الصحة عند الناس.	يوم الصحة الرياضية هو يوم تسعة من شهر عشرة وهو عطلة قومية الهدف منها تحسين صحة المواطنين.
هل من الممكن أن تنظف المنضدة من فضلك ؟	ممكن تنظف الطاولة، لو سمحت؟	ممكن تنظف الطاولة لو سمحت؟
يوجد عصير أناناس وبرتقال وطماطم .	في عصير أناناس و برتقال و بندورة.	في عصير أناناس وبرتقال وطماط.
أود الإقامة بهذه الغرفة ليلة واحدة أخرى .	بدي أظل بهاي الغرفة ليلة ثانية.	بدي أظل بهاي الغرفة ليلة ثانية.
ثمانية دولارات . وهنا تأتي واحدة حالا .	ثمن دولرات. وهون بتيجي وحدة هسا.	ثمانية دولارات. وهنا بتيجي وحدة هسا.
هذا حسن بالنسبة لي . في الواقع أحب أن أدخن .	هاذ تمام بالنسبة إلي . بصراحة أني بحب أدخن.	هاظ كويس بالنسبة الي. بس بحب ادخن.
المكان كان على كرسي في البهو .	المكان كان عكرسي باللوبي.	المكان كان كرسي بالطابق الأرضي.
أشعر بصداع خفيف .	حاس بصداع خفيف.	بحس بصداع خفيف.
ألو ، اسمي أودا . عندي حجز الليلة ، لكن سوف أتأخر في القدوم . لهذا من فضلك اتركوا لي الحجز .	مرحبا، اسمي أودا. عندي حجز هالليلة، بس راح يتأخر وصولي. يرجـى خليكو الحجز لي.	ألو ، اسمي أودا. عندي حجز الليلة ، بس رح أتأخر عن الحضور.
أين قسم السفر ؟	وين قسم السفر؟	وين قسم السفر؟
هل لديك أي صورة لبطاقة هوية ؟	عندك اي صورة للهوية؟	عندك صورة لهوية ؟
هل لك أن تعطيني إشارة بالضوء عندما تكون فيها ؟	بتقدر تعطيني إشارة بالضو لما تكون فيها؟	ممكن تعطيني إشارة بالضوء لما تكون فيها؟
أريد فحص هذه الحقائب المتجه إلى طوكيو , من فضلك .	بدي اتفقد هالشناتي اللي رايحة لطوكيو، لو سمحت.	بدي أفحص هاي الشناتي اللي رايحة على طوكيو, لو سمحت.
ثمة شئ خطأ في آلة التهوية هذه .	في اشي غلط بالمروحة هاذ.	في اشي غلط بهاي الماكينة.
منذ هذا الصباح .	من الصبح.	من هاد الصباح.
من فضلك قس حجم حذائي .	لو سمحت قيس حجم كندرتي.	لو سمحت قس حجم حذائي.
أوافق . إنه أحد الأماكن المفضلة لي .	موافق. هاذ واحد من احلا الاماكن عندي.	موافق. هو واحد من الأماكن اللي بحبها.
لابد أن تكون هادئة .	لازم تكوني هادية.	لازم تكون هادئة.
أريد مطفأة سجائر .	بدي منطفة سجاير.	بدي مطفأة دخان.
أود أن أتتناول طبقا مثل هذا .	بدي أوكل صحن زي هاظ.	بدي اكل طبق زي هاي.
أين توجد أقرب مغسلة ؟	وين اقرب مغسلة؟	وين أقرب مغسلة؟
هل لي بجدول مواعيد ؟	أعطيني جدول المواعيد؟	ممكن جدول مواعيد؟
من فضلك اعطني هذه .	لو سمحت اعطيني هاي.	لو سمحت أعطيني هاي.
هل يمكن أن أذهب لمشاهدة المعالم أثناء رسو السفينة في الميناء ؟	بقدر أروح اشوف المناظر لما السفينة تكون راسية بالمينا؟	بقدر اروح اشوف المعالم لما ترسو السفينة بالميناء؟
هل يوجد مكان يقبل تنظيف الملابس في أيام الآحاد ؟	في أي مكان بقبل طلبات الغسيل كل يوم أحد؟	في مكان بتقدر تنظف فيه الملابس أيام الأحد؟
هل توجد خدمة نقل بالحافلات إلى متحف فورد ؟	في خدمة باصات بتروح على متحف فورد؟	في خدمة النقل بالحافلات لمتحف فورد؟
أنا من النرويج .	أني من النرويج.	أنا من النرويج.
عشرة طوابع من فضلك .	عشر طوابع لو سمحت.	عشر طوابع لو سمحت.
هل يمكنك أن تجر سيارتي ؟	ممكن تجرب سيارتي؟	بتقدر تجر سيارتي؟
إنه سمك ثعبان مشوي مع مرقة خاصة فوق سلطانية من الأرز .	هاذ سمك الانقليس مع صلصة خاصة محطوطة فوق سلطانية الرز.	سمك ثعبان مشوي مع مرقة خاصة فوق سلطانية الأرز.
هل يمكنني إعادتها في مدينة مختلفة ؟	بقدر أرجعها بمدينة ثانية؟	بقدر أرجعها بمدينة مختلفة؟
عندي الدواء الخاص بي .	عندي الدوا تاعي.	عندي الدواء تبعي.
هل لديكم أفلام للصيف ؟	عندكو أفلام للصيف؟	عندكم أفلام للصيف؟
هل تريد أن تذهب للتسوق معي بعد الظهر ؟	بتحب تيجي معي نتسوق بعد الظهر؟	بدك تروح تتسوق معي بعد الظهر؟
نعم ، سيدي . كيف تريدني أن اقطعها ؟	أيوة ، يا سيدي . كيف بدك إني أقصها؟	اه ، سيدي. كيف بدك تقطعها ؟
عندما أعود ثانية إلى اليابان ، سأكتب خطاباً . وإذا كان لديك وقت ، من فضلك أرسل لي خطاباً .	لما أرجع مرة ثانية لليابان، رح أكتب رسالة. وإذا كان عندك وقت، تكرم ابعثلي انا رسالة.	لما أرجع على اليابان ، رح أكتب رسالة. إذا عندك وقت ، لو سمحت أرسللي رسالة.
فراولة ، من فضلك .	فراولة، لو سمحت.	فراولة ، لو سمحت.
هل تفضل ماسكات للشعر أصغر أم أكبر ؟	بتحبي القناع للشعر أصغر ولا أكبر؟	بتحب مساج للشعر أصغر ولا أكبر؟
بالتأكيد . متى تود أن تلعب جولف ؟	طبعاً. أميت بدك تلعب جولف؟	أكيد. متى بدك تلعب جولف؟
من فضلك اجعل الجزء العلوي أطول قليلاً .	من فضلك خلي الجزء الفوقاني أطول شوي.	لو سمحت اجعل الجزء العلوي أطول شوي.
كم أوقية من العطر أستطيع الحصول عليه من غير رسوم ؟	كم وقية من العطر بقدر أوخذها بدون رسوم ؟	كم قنينة عطر بقدر اجيبها بدون رسوم؟
معذرة , قم بالضغط على مصراعي النافذة الخشبيين , من فضلك .	عفواً، نزل اباجور الشباك الخشب , لو سمحت.	عفواً, ضغط على مقبضي الشباك الخشبيين, لو سمحت.
لدي ثلاث حقائب .	عندي ثلث شناتي.	عندي ثلاث شناتي.
هذا البيت يبدو مريحا للمعيشة فيه , أليس كذلك ؟	هاد البيت مبين كثير مريح العيشة فيه، مش هيك؟	هاظ البيت شكله مريح للعيش فيه, صح ؟
أريد أن أغسل ملابسي في وقت لاحق اليوم .	بدي أغسل وعيتي بوقت ثاني اليوم.	بدي أغسل ملابسي بوقت ثاني اليوم.
أرجو ذلك .	بتمنى هيك.	بتمنى هيك.
واحد لنيويورك ، من فضلك .	واحد لنيويورك، إذا سمحت.	واحد لنيويورك، لو سمحت.
لا ، إنها لا تشمل الضريبة ومصاريف الخدمة .	لا، هي ما بتشمل الضريبة ومصاريف الخدمة.	لا، ما بتشمل الضريبة ومصاريف الخدمة.
قم بها بطريقتك .	اعملها بطريقتك.	اعملها بطريقتك.
كم تستغرق مشياً على الأقدام ؟	قديش بتوخذ وقت مشي عالجرين؟	قديش بدك مشي مشي؟
هل يمكنني الحصول على برنامج ؟	بقدر آخذ برنامج؟	بقدر اخد برنامج؟
من فضلك سجل عنوان الاتصال بك هنا .	من فضلك اكتب عنوانك للتواصل معك هون.	لو سمحت سجل عنوان الاتصال بك هون.
نعم ، يا سيد تاناكا هناك رسالتان لك .	أيوة، يا سيد تاناكا، في عندك رسالتين.	اه ، يا سيد تاناكا في رسالتين لك.
هل لي في شيء من لحم الخنزير والبيض ؟	ممكن شوية من لحم الخنزير والبيض؟	ممكن أقدر أطبخ لحم الخنزير و البيض؟
إذا حدث ذلك ، من فضلك أتصل بي .	اذا صار هيك ، لو سمحت رنلي .	اذا حدث هاظ ، لو سمحت رنلي.
أوه ، آسف لأني أزعجتك .	اووه، معذرة الك ازعجتك.	اه ، آسف لاني ازعجتك.
هل يمكن أن أقيس مقاس تسعة .	ممكن أقيس مقاس تسعة ؟	بقدر اقيس مقاس تسعة؟
ملابسه دائماً موضة قديمة .	هدومه دايما موضة قديمة.	ملابسه دائما قديمة.
هلا حجزت لي تاكسي الساعة السادسة صباح غد , من فضلك ؟	ممكن تحجزلي تكسي الساعة ستة الصبح لبكرا ، لو سمحت؟	ممكن تحجزلي تاكسي الساعة ستة الصبح بكرا, لو سمحت؟
إنه صحيح هنا .	هو صحيح هون.	صح هون.
هل يمكن أن تدخل معه فكة صغيرة ؟	بتقدر ادخل معه شوية فراطة؟	ممكن تدخل معه فراطة صغيرة؟
أنا حقا آسف .	أني جد آسف.	أنا جد آسف.
لقد طلبت ذلك .	طلبت هاظ.	طلبت هيك.
ما تكلفة هذا في اليوم ؟	قديش تكلفته ليوم واحد؟	قديش بتكلف هاد باليوم؟
لا توجد أية مشاكل .	ما في أي مشاكل.	ما في مشاكل.
أجل . سنصل في الثامنة حسب التوقيت المحلي .	أها. رح نوصل الساعة ثمنية بالتوقيت المحلي.	اه. رح نوصل الساعة ثمانية حسب التوقيت المحلي.
هل لديك واحد أكبر ؟	عندك واحد أكبر؟	عندك واحد أكبر؟
أنا كينجي .	أني كينجي.	أنا كينجي.
إنه المبنى الثاني على يسار هذا المبني الأبيض .	البناية الثانية على يسار البناية البيضا.	هو المبنى الثاني على يسار هاد المبني الأبيض.
أعطني قطعة لحم الخنزير هذه ، ولكن ليس بسمك تلك .	أعطييني قطعة لحمة الخنزير هاي، بس ما تكون سميكة مثل هذيك.	أعطيني قطعة لحم الخنزير هاي، بس مش بسمك هاي.
لدي موعد آخر .	عندي موعد ثاني.	عندي موعد ثاني.
لدي غرفة جاهزة لك في جراند هويتل . هل تستطيع الذهاب إلى هناك ؟	عندي غرفة جاهزة إلك بالجراند هوتيل. بتقدر تروح لهناك؟	عندي غرفة جاهزة لك في جراند هويتل. بتقدر تروح هناك؟
أرني واحدة لإحدى الشابات .	وريني وحدة لوحدة من الصبايا.	فرجيني وحدة لواحدة من البنات.
أود أن أحجز غرفة لهذه الليلة .	بدي أحجز غرفة لهاي الليلة.	بدي أحجز غرفة لهاي الليلة.
لقد خلعت البنطلون .	شلحت البنطلون.	خلعت البنطلون.
إنها رائعة .	هاي روعة.	هاي حلوة.
أهذه هي الحافلة التي توصل إلى وسط المدينة ؟	هاظ هو الباص اللي بوصل لوسط البلد؟	هاي الباص اللي توصل وسط البلد؟
أتظن ذلك ؟	بتظن هيك؟	بتظن هيك؟
أود أن أرسله عن طريق البريد .	حاب أبعثه عن طريق البريد.	بدي ابعثه بالبريد.
أشكرك ثانية لأنك ذكرتني . هل يميل كثير من الناس أن ينسوا توقيع أسمائهم ؟	بشكرك مرة ثانية عشان ذكرتني. بروح كثير من الناس تنسى توقع ع أسمائهم ولا شو؟	شكرا مرة ثانية لأنك ذكرتني. كثير الناس بميلوا ينسوا توقيعاتهم؟
هلا أرسلت تاكسي إلى المدخل الرئيسي لـ ويستمانستر مول ؟	ممكن تودي تكسي للمدخل الرئيسي بويستمانستر مول؟	ممكن تبعثلي تاكسي على المدخل الرئيسي لـ ويستمانستر مول؟
هل لديكم أية جولة سياحية أخرى ؟	عندك أي رحلة ثانية؟	عندكم جولة سياحية ثانية؟
السيارة تصدر صاخبا غريبا .	السيارة بطلع صوت غريب وعالي.	السيارة بتصدر صاخبة غريبة.
هذه سبعون دولار .	هاي سبعين دولار.	هاي سبعين دولار.
أنا شديد الحساسية للقطط .	أني بتحسس كثير من البسس.	أنا كثير حساس من القطط.
لا . قليلاً في الأمام . هناك ، نعم .	لا. شوي لقدام. هناك، إيوه.	لا. شوي بالجنب. هناك، اه.
ركن المدخنين ، من فضلك . وشباك بجوار النافذة ، من فضلك .	ركن الشيشانيين، إذا سمحت. وشباك جمب النافذة، إذا سمحت.	ركن المدخنين، لو سمحت. وباك جنب الشباك، لو سمحت.
هل يكلفني دخول هذا المبنى أي أموال ؟	بدفع أي مصاري إذا فتت على هاي العمارة؟	بتكلفني دخول هاد المبنى أي أموال؟
سأكون هنا حتى التاسعة . يحدوني الأمل أن تتمكن من القبض على المجرم في أقرب وقت ممكن .	راح أظل هون للساعة تسعة. بتمنى إنكم تمسكوا المجرم بأسرع وقت.	رح أكون هون حتى التسعة. بتمنى إنك تقبض على المجرم بأسرع وقت ممكن.
شكراً لك . من فضلك عاود مرة أخرى .	مشكور. يلا جرب مرة ثانية من فضلك.	شكرا الك. لو سمحت عاود مرة ثانية.
فاتتني محطتي .	راح علي الموقف.	ضيعت محطتي.
أين يمكنني أن أقيم أثناء الجولة ؟	وين ممكن أسكن خلال الرحلة؟	وين بقدر اسكن اثناء الجولة؟
إنه لمن دواعي السرور أن أتحدث معك .	إنسريت بالحكي معك.	كثير مبهج أني أحكي معك.
أي مقاس تريد ؟	شو السايز اللي بدك ياه؟	أي مقاس بدك ؟
بالتأكيد ، هل تريد تسريحة متموجة دائما ؟	أكيد، بدك اياه كيرلي دايما؟	أكيد، بدك تسريحة متموجة دائما؟
إلى اليسار ، من فضلك .	على اليسار، لو سمحت.	لشمال ، لو سمحت.
لقد أتلفت حقيبتي .	دمرت شنتتي.	ضيعت شنتتي.
البيتزا لذيذة . من صنعها ؟	هاي البيتزا زاكية. مين عملها؟	البيتزا حلوة. مين صنعها؟
أخشى أن أسأل ، لكن ماذا تعني ؟	بخاف اسأل، بس شو قصدك؟	خايف اسأل، بس شو تعني؟
لا ، من فضلك اجلس وانتظر . سأعود بعد قليل .	لا، لو سمحت اقعد واستنى. راح أرجعلك بعد شوي.	لا، لو سمحت اقعد و استنى. رح أرجع بعد شوي.
الكعب مرتفع جداً .	الكعب عالي كثير.	الكعب عالي كثير.
كم سيستغرق إصدار التأشيرة لي ؟	قديش الفيزا بدها وقت عشان تطلع؟	قديش رح يبلش اصدار التأشيرة الي؟
لقد تعطلت سيارتي .	خربت سيارتي .	ضيعت سيارتي.
كيف أثر الركود على الشركة ؟	شلون أثر الركود عالشركة ؟	شلون أثر الركود بالشركة؟
توجد رحلات جوية على شركات جال وانا التي تقلع في الساعة العاشرة وخمسة وخمسين دقيقة . ولكن , للأسف كلتا الرحلتين محجوزتان .	في طيارات على شركات جال وانا اللي بتغادر الساعة عشرة وخمسة وخمسين دقيقة. بس، للأسف الطيارتين مفللات.	في رحلات جوية على شركات جال وانا اللي بتطير الساعة عشرة ونص ونص ونص ونص. بس, للأسف الرحلتين محجوزتين.
هل هذا سيفسد ؟	هاذ رح يخرب؟	هاظ رح يفسد؟
هل يمكنك أن تخبرني بقيمة هذه المكالمة ؟	بتقدر تحكيلي تكلفة هاي المكالمة؟	ممكن تحكيلي كم المكالمة؟
من الأفضل أن تضبط المرآة العاكسة للرؤية الخلفية .	أحسن شي تزبط المراية الخلفية.	أحسنلك تضبط المرآة العاكسة للرؤية الخلفية.
كم أجرة التاكسي حتى هذا الفندق ؟	كم أجرة التكسي لعند الفندق؟	قديش أجرة التكسي للفندق؟
أريد مزيلا لطلاء الأظافر .	بدي أسيتون للمناكير.	بدي مزبوط للجلد.
ما هي مكونات هذا الطبق ؟	شو مكونات هالصحن؟	شو مكونات هاد الطبق؟
متى ينبغي أن آتي ؟	متى لازم آجي ؟	متى لازم ايجي؟
هل يمكن أن تخبرني عن الأماكن الشيقة هنا ؟	ممكن تحكيلي عن الأماكن الحلوة هون؟	ممكن تحكيلي عن الأماكن الحلوة هون؟
حسنا ، اضغط تسعة وصفر واحد واحد ، ثم الكود الخاص بالبلد ورقم الهاتف .	طيب، إكبس تسعة وصفر واحد واحد، وبعدين الكود تبع البلد ورقم التلفون.	تمام ، اضغط تسعة وصفر واحد ، ثم الكود الخاص بالبلد ورقم التلفون.
أعتقد أنك ارتكبت خطأً . الغرفة دفع ثمنها مسبقاً . معي إيصال .	بظن إنك غلطت. الغرفة حاسبت عنها قبل. معي وصل.	بتوقع إنك غلطت. الغرفة دفعت ثمنها قبل. معي وصل.
هل يمكنك أن تتحرك بهذا الاتجاه ؟	بتقدر تمشي بهالجهة؟	بتقدر تروح بهذا الاتجاه؟
سيغادر قطارك من الرصيف رقم ثمانية .	رح يطلع قطارك من السكة رقم ثمانية.	رح يطلع قطارك من الرصيف رقم ثمانية.
أريد غرفة أخرى .	بدي غرفة ثانية.	بدي غرفة ثانية.
لماذا يحدث هذا ؟	ليش بصير هاذ ؟	ليش بصير هاظ؟
ما الرقم الذي أطلب منه هنا ؟	شو الرقم اللي بطلب منه هون؟	شو الرقم اللي بدي اطلبه هون؟
هل يوجد مطعم أرخص قريب من هنا ؟	في مطعم رخيص قريب من هون؟	في مطعم أرخص قريب من هون؟
هل يوجد مطعماً يمكنك أن تزكيه بالقرب من هنا ؟	في مطعم بتنصح فيه قريب من هون؟	في مطعم بتقدر تزكيه قريب من هون؟
أوبرا ميتروبوليتان .	أوبرا المتروبوليتان.	أوبرا ميتروبوليتان.
أين المصعد ؟	وين الأصنصير؟	وين المصعد؟
هل يمكنك أن ترني أشياء أخري ذات تصميمات مختلفة .	ممكن توريني شغلات ثانية بأشكال غير؟	ممكن تفرجيني أشياء ثانية زي ما بتصممي.
ليس بمقدورك تغيير وظيفتك بسهولة .	ما بتقدر تغير شغلك ببساطة.	مش قادر تغير شغلك بسهولة.
ماذا تسمون هذا بالإنجليزية ؟	شو بتسموه هاذ بالإنجليزي؟	شو بتسمو هاظ بالانجليزي؟
سأصل في التاسع من مارس وأغادر في الرابع عشر .	راح أوصل بتسعة ثلاث وراح أروّح بأربعطعش.	رح أوصل يوم تسعة من شهر خمسة و أطلع يوم ثلاثطعش.
هل ستحدد موعداً للخروج معي ؟	بدك تحدد موعد لتطلع معي؟	رح تحدد موعد للخروج معي؟
لم اسمع بهذا العنوان من قبل بالقرب من هنا .	ما سمعت بهاذ المكان قبل هيك بالمنطقة هون .	ما سمعت هاظ العنوان من قبل قريب من هون.
سوف أحضر لك العرض الأسبوع القادم .	بدي اجهزلك العرض الاسبوع الجاي.	رح أجيبلك العرض الأسبوع الجاي.
صديقي مريض جداً . هل تستطيع أن تطلب دكتور ، من فضلك ؟	صاحبي كثير مريض. ممكن تطلب الدكتور، لو سمحت؟	صاحبي مريض كثير. بتقدر تطلب دكتور، لو سمحت؟
هل أخذت تذكرة الحافلة ؟	اخذت تذكرة الباص؟	أخذت تذكرة الباص؟
يوجد لدى حوالي ألفي وخمسمائة دولار بالين الياباني .	أنا معي حوالي ألفين وخمسميت دولر بالين الياباني.	في عندك حوالي ألفين و خمسمائة دولار بالين الياباني.
هل يمكنني استئجار مرشداً يتحدث اللغة اليابانية ؟	ممكن أستأجر دليل بسولف ياباني؟	بقدر استأجر مرشد بحكي ياباني؟
هذا بعينه ما كنت أبحث عنه .	هاي بالزبط اللي كنت بدور عليه.	هاد هو اللي كنت بدور عليه.
رقم مقعدي دي اثنا عشر . أين هو ؟	رقم كرسيي دي اثنعش. وين هو؟	رقم مقعدي دي إثنعش. وين هو ؟
فينس وليندا يريدان أن يبقيا بمفرديهما ، لذا أخشى أنني لا بد أن أبقى هنا هذه الليلة .	فينس وليندا بدهم يظلوا لحالهم، فبخاف انو لازم اظل هون الليلة.	فينس وليندا بدهم يبقيا مع بعض الليلة.
إنها تبعد حوالي تسعة وتسعون ميلا .	هي بتبعد حوالي تسعة وتسعين ميل.	تبعد حوالي تسعة وتسعين ميل.
حسناً ، تم إعادة التأكيد على حجزك .	ماشي، اتأكدنا من حجزك مرة ثانية.	تمام ، أعيد تأكيد حجزك.
حسناً ، فلنق نظرة عليك .	طيب ، خلينا نطل عليك .	تمام ، خلينا نشوفك.
هل يجب على أن أجيب بـ نعم أو بـ لا ؟	لازم اجاوب بـ اه أو بـ لأ ؟	لازم اجيب انعم ولا بـ لا؟
من فضلك ، بدلي شيك المسافرين إلي نقود .	لو سمحت اصرفلي هاد الشك السياحي كاش.	لو سمحت، بدلي شيك المسافرين للنقود.
من فضلك دلني على أرخص وسيلة للذهاب إلى سان فرانسيسكو .	من فضلك دلني على أرخص طريقة حتى أروح على سان فرانسيسكو.	لو سمحت دلني على أرخص وسيلة عشان أروح على سان فرانسيسكو.
أريد غرفة مفردة بحمام لقاء ثمانين دولارا ، من فضلك .	بدي غرفة فردية مع حمام بـثمانين دولار, لو سمحت.	بدي غرفة منفردة بحمام مقابل ثمانين دولار، لو سمحت.
من فضلك ، هل رسمت لي خريطة بسيطة من هنا ؟	من فضلك، بتقدر ترسملي خريطة سهلة من هون؟	لو سمحت، رسمتلي خريطة بسيطة من هون؟
ليس لدي أية مضارب أو أحذية .	ما عندي لا مظارب ولا أحذية.	ما عندي مضارب أو أحذية.
أوه ، يبدو أنني افقد شيء ما كل وقت أسافر فيه .	أوه، شكلني بضيع اشي كل مرة بسافر فيها.	اه ، شكله انا بضيع إشي كل وقت اسافر فيه.
أجل ، إنها مفتوحة من التاسعة حتى التاسعة .	أها ، هي فاتحة من الساعة تسعة للساعة تسعة.	اه ، هي مفتوحة من التسعة للعاشرة.
سيأتي القطار السريع التالي بعد ساعة .	راح يجي القطار السريع الجاي بعد ساعة.	رح يطلع القطار السريع الثاني بعد ساعة.
مرحبا . كيف حالك ؟	مرحبا . كيف حالك؟	مرحبا. كيف حالك ؟
تاريخ الانتهاء تسعة عشر من مارس تسعة وتسعين .	تاريخ انتهاء الصلاحية تسعطعش من شهر ثلاث التسعة وتسعين.	تاريخ الانتهاء تسعة عشر من شهر تسعة تسعة تسعة وتسعين.
هلا احتفظت بهذا لي ؟	ممكن تظبلي هاد؟	ممكن تخليلي هاي؟
هل تقبل بالين الياباني ؟	بتوخذ بالين ياباني؟	بتتقبل بالين الياباني؟
من فضلك ، اكتب رقم الغرفة في الخلف .	من فضلك ، اكتب رقم الغرفة بقفى الورقة.	لو سمحت، اكتب رقم الغرفة من ورا.
هل يمكنك أن تصلح ذلك ؟	بتقدر تصلح هاي؟	بتقدر تصلحلي هاد؟
سيداتي سادتي ، لدينا على متن رحلتنا اليوم مضيفين يتحدثون اليابانية يمكن التعرف عليهم من خلال الشارة التي يلبسونه . إذا كنت تعرف أي شخص يريد مساعدة في الترجمة ، من فضلك دعنا نعرف .	سيداتي وسادتي،برحلتنا اليوم، عنا مضيفين بحكوا ياباني بتعرفوهم من الباجة اللي لابسينها. إذا بتعرف إنه أي حد بحتاج مساعدة بالترجمة، لو سمحت خلينا نعرف.	سيداتي سادتي، عنا مضيفين بحكي ياباني، إذا بتقدر تعرف حدا بيحكي ياباني، لو سمحت. خلينا نتعرف عليهم من خلال الشارة اللي بلبسوها.
هل يجب أن أدفع الرسم الإضافي عندما أدخل مبنى ؟	لازم أدفع رسوم ثانية بس أفوت عأي مبنى؟	لازم أدفع الرسم الإضافي لما أدخل مبنى؟
لقد انكسرت السنة .	انكسرت السنة.	انكسرت السنة.
تبدو البونساي كهواية شخص هرم .	شكلها البونساي هواية الختيار.	شكل البونساي كهواية لشيخ هرم.
لدينا غرفة مزدوجة بحمام بخمسة و ثمانين دولار .	عنا غرفة مزوجة مع حمام بخمسة وثمنين دولار.	عنا غرفة مزدوجة بحمام بخمسين دولار.
هل هذه من نوع ليفي خمسة صفر المعتمدة ؟	هاي من نوع ليفي خمسة صفر الأصلية؟	هاي من نوع ليفي خمسة صفر المعتمدة؟
هل يمكن أن أبيت عندكم الليلة ؟	بقدر أبات عندكو الليلة؟	ممكن أضل عندكو الليلة؟
هل تود منضدة في المطعم الرئيسي أو في غرفة خاصة يا سيدي ؟	سيدي، بتحب طاولة بالمطعم الرئيسي ولا بغرفة خاصة؟	بدك طاولة بالمطعم الرئيسي أو بغرفة خاصة يا سيدي؟
مائة بالمائة قطن .	مية بالمية قطن .	مائة بالمية قطن.
إنها لذيذة جداً .	كثير طيبة.	حلوة كثير.
هل أستطيع التحدث مع المدير ؟	بقدر أحكي مع المدير؟	بقدر احكي مع المدير؟
أنا آسف ، هو ليس بالداخل الآن .	أني آسف، هو مش جوا هسا.	أنا آسف ، هو مش جوا هسا.
أريد غرفة بسريرين . ما ثمن الغرفة في الليلة ؟	بدي غرفة بتختين. قديش تكلفة الغرفة بالليل؟	بدي غرفة بسريرين. شو سعر الغرفة الليلة؟
ابقى على الخط وانتظر لحظة من فضلك .	خليك على الخط و استنى شوي من فضلك.	خلي الخط يرن شوي لو سمحت.
هل يمكنني أن أرسل أي ميل واحد فقط قيمته دولار .	بقدر أبعث أي ميل واحد تكلفته بس دولر؟	بقدر ابعث ميل واحد بس قيمته دولار.
من أين تغادر الحافلات لمشاهدة المعالم ؟	من وين بتطلع الباصات حتى نشوف المناظر؟	من وين بتروح الباصات عشان تشوف المعالم؟
هل لديك ألوان أخرى من هذا ؟	عندك ألوان ثانية من هاذ؟	عندك ألوان ثانية من هاد؟
اذهب إلى نادي رياضي كل يومين .	روح عالجيم كل يومين.	روح على نادي رياضي كل يومين.
تم الفصل بين مقاعدنا .	صار فصل بين كراسينا.	فصلت مقاعدنا.
هل لك أن تخبرني عن مكان تحليق الطائرة الآن ؟	بتقدر تحكيلي وين بطير الطيارة هسا؟	ممكن تحكيلي مكان تحليق الطيارة هسا؟
كيف ترغب في إجراء المكالمة ؟	شلون بدك تعمل المكالمة؟	كيف بدك ترنلي؟
أفهم ذلك . أحاول استئجار سيارة سيتروين .	بفهم هالاشي. بحاول أستأجر سيارة سيتروين.	فهمت هيك. بدي استأجر سيارة سيتروين.
هذه هي الغرفة اثنا عشر صفر سبعة .	هاي هي الغرفة اثنعش صفر سبعة.	هاي الغرفة اثنعش صفر سبعة.
هل لك أن تأخذ هذا ، من فضلك ؟	ممكن توخذ هاذ، لو سمحت؟	ممكن تأخذ هاظ، لو سمحت؟
كم عمر هذا الصبي ؟	قديش عمر هالولد؟	قديش عمر هاد الصبي ؟
قارب مع مرشد ، من فضلك .	قارب مع مرشد ، لو سمحت.	قارب مع مرشد، لو سمحت.
القهوة غير محسوبة .	القهوة مش محسوبة؟	القهوة مش محسوبة.
لقد أضعت تذكرة الطيران الخاصة بي .	انا ضايع تذكرة الطيران حقتي.	ضيعت تذكرة الطيران تبعي.
نعم , في بادئ الأمر ، اغسليها على منفصلة .	أيوة, بالأول, غسليها لحالها.	اه, اول الامر, اغسليها على وحدة منفصلة.
هل يمكنني أن التقط بعض الصور ؟	ممكن اوخذ شوية صور؟	بقدر اصور شوية صور؟
هلا فتحت هذه الحقيبة ، من فضلك ؟ ماذا يوجد هنا .	بتقدر تفتح هاي الشنطة، لو سمحت؟ شو لقيت فيها هون؟	ممكن تفتح هاي الشنتة، لو سمحت؟ شو في هون؟
ما نوع هذه الموسيقى ؟	شو نوع هاي الموسيقى؟	شو نوع هاي الموسيقى؟
أريد بعض الكريم للأيدي .	بدي شوية كريم للإيد.	بدي شوية كريم للأيدي.
مائة غير المدخنين من فضلك .	مية غير اللي بدخنوا، لو سمحت.	مائة غير المدخنين لو سمحت.
من فضلك أعطني بعض الفكة .	لو سمحت اعطيني شوية فراطة.	لو سمحت أعطيني شوية فراطة.
بالتأكيد . لدينا بعض الماركات الأمريكية الأصلية الجميلة . للكتب .	أكيد. عنا شوية ماركات أمريكية أصلية حلوة. للكتب.	أكيد. عنا شوية ماركات أمريكية أصلية حلوة. للكتب.
لدي وصولها ، سوف ندفع ثمن شحنها إلى عنوان منزلك .	لما توصل. راح ندفع حق الشحن لعنوان بيتك.	عند وصولها، رح ندفع ثمن شحنها لعنوان بيتك.
إنها مشغولة .	هيه مشغولة.	هي مشغولة.
سرقت حقيبتي في الشارع .	انسرقت شنتي بالشارع.	سرقت شنتتي بالشارع.
لم تصنع هذه باليابان ، أليس كذلك ؟	ما صنعت هاي باليابان، صح؟	ما صنعت هاي باليابان، صح؟
سيبدأ الصعود على متن الطائرة الساعة الرابعة والنصف لذلك من فضلكم كونوا هناك قبل هذا الموعد .	رح يبلش الصعود على الطيارة الساعة أربعة ونص . لذالك لو سمحتو كونو هون قبل هذا الوقت.	رح يطلع الطيارة الساعة أربعة ونص تقريباً، لو سمحتوا كونوا هناك قبل هاد الموعد.
نحن هنا لمدة يوم .	إحنا هون لمدة يوم.	احنا هون ليوم.
لقد فقدت شيكاتي السياحية .	ضيعت الشيكات السياحية تبعتي.	ضيعت شيكاتي السياحية.
ما أنواع الخضراوات الموجودة لديك ؟	شو هي الخضرة اللي عندك؟	شو أنواع الخضراوات اللي عندك؟
يجب أن أنتقل إلى عربة مكيفة واحد صفر صفر . هل هذا ممكن ؟	بدي انتقل لعرباية مكيفة واحد صفر صفر. ممكن؟	لازم أروح على عربة مكيفة واحد صفر صفر. ممكن ؟
نعم ، حجز لمدة ستة أيام من فضلك ، بدء من الثالث والعشرين من يوليو .	ايوه، حجز لست أيام لو سمحت، ببلش من ثلاث وعشرين ستة.	اه ، حجزت لمدة ستة ايام لو سمحت ، بدي من ثلاث وعشرين من شهر سبعة.
من أي مكان يمكنني أن أغير القطار الذي يوصلني إلى إدنبره ؟	منين بقدر أغير القطار اللي بوصلني لادنبرة؟	من أي مكان بقدر أغير القطار اللي يوصلني على إدنبره؟
أكثر منتجاتنا بيعت عبر السنوات الأربع الماضية هي الآلة الناسخة طراز أ . أكس أربعة خمسة صفر .	أغلب اللي بعناه من منتجاتنا على مرّ الأربع سنين اللي فاتت هي الآلة الناسخة، طراز أ . أكس أربعة خمسة صفر.	أكثر منتجاتنا بيعت خلال السنوات الأربع الماضية هي آلة الطباعة طراز أ. أكس أربعة خمسة صفر.
آسف سأعود لاحقاً .	آسف. راح أرجع بعدين.	آسف راح أرجع بعدين.
هل يتحتم عليك كثيراً أن تعمل حتى ساعة متأخرة ؟	بتظطر كثير تشتغل لوقت متأخر؟	لازم تعمل لساعة متأخرة؟
هل لديك نفس هذا التصميم بكعب أعلى ؟	عندك نفس هاذ الديزاين بس كعب أعلى؟	عندك نفس التصميم بكعب أعلى؟
التكلفة ، من فضلك . هل تقبلون بطاقة فيزا ؟	الحساب ، لو سمحت. يتقبلو بطاقة فيزا؟	التكلفة ، لو سمحت. بتقبلوا بطاقة فيزا ؟
من فضلك استلق هنا .	لو سمحت، اتمدد هون.	لو سمحت استنى هون.
اسمي ميتشكو تاناكا ، ورقم الرحلة إلى طوكيو هو خمسة ، صفر ، واحد .	اسمي ميتشكو تاناكا، ورقم الرحلة لطوكيو هو خمسة، صفر، واحد.	اسمي ميتشكو تاناكا، ورقم الرحلة لطوكيو خمسة، صفر، واحد.
آه ، كلا . من فضلك أسرع . إننا متأخرون .	آه، لأ. لو سمحت عجل، إحنا متأخرين.	آه ، لا. لو سمحت أسرع. إحنا متأخرين.
ما هي أفضل جولة حتى أرى أشهر الأماكن ؟	شو هي أحسن رحلة عشان أشوف أشهر الأماكن؟	شو أحسن جولة عشان أشوف أشهر الأماكن ؟
حسنا . مقعدان من فضلك .	ماشي. كرسيين لو سمحت.	تمام. مقعدين لو سمحت.
أظن أنه بديع المنظر .	بظن انه منظره صاير حلو.	بتوقع انه حلو المنظر.
بنطلون أخر ؟	بنطلون ثاني؟	بنطلون ثاني؟
سأجرب بعضاً من الشراب المثلج .	بدي أجرب شوي من العصير المثلج.	رح أجرب شوية عصير.
هل هذا هو الطريق الصحيح إلى المحطة المركزية ؟	هاد الطريق الصح للمحطة الرئيسية؟	هاظ هو الطريق الصح للمحطة المركزية؟
أريد شراء تذكارات لأصدقائي . أيمكن أن تُوصي ببعض منها ؟	بدي أشتري هدايا تذكارية لأصحابي. ممكن تنصحني بإشي؟	بدي أشتري تذكارات لصحابي. بتقدر تنصحني شوية منها؟
أريد الحصول على تأمين .	بدي تأمين.	بدي تأمين.
آوه إلقاء نظرة على صندوقك .	واو أنا حاب أشوف صندوقك.	اه اشوف صندوقك.
إنها أربعة عشرة .	هاي أربعطعش.	هي أربعة عشر.
سأنتظر حتى يتاح الجلوس في التراس .	رح أستنا لحتى يصير الجلوس بالتراس ممكن.	رح أنتظر حتى يصير لي مكان بالتل.
يمكنك أن تمكث في منزلي .	ممكن تفضل تقعد ببيتي.	بتقدر تضل بمنزلي.
هذا , من فضلك .	هاظ ، لو سمحت.	هاظ, لو سمحت.
من فضلك نظف هذا المعطف .	لو سمحت نظف هاظا الكبوت.	لو سمحت نظف هالمعطف.
شراب الشمام كحلاء ، من فضلك .	عصير الشمام كحلو ، لو سمحت.	شراب الشمام كحلاء ، لو سمحت.
أخطط لتعلم الجولف .	بفكر أتعلم جولف.	بدي أتعلم الجولف.
كان هذا مكسوراً بالفعل عندما فتحت الطرد .	كان هاذ مكسور فعلاً لما فتحت الطرد.	كان هاد مكسور فعلا لما فتحت الطرد.
توقفت ساعتي .	ساعتي وقفت.	توقفت ساعتي.
أجل . إنها مشكلة تخلص من الفضلات .	أيوة. هاي مشكلة كب الزبالة.	اه. هاي مشكلة تخلص من الفضلات.
هناك محل لبيع الزهور في الطريق .	في محل ورد بالطريق .	في محل لبيع الزهور بالطريق.
هل السيدات يقبلن هذا ؟	الستات بقبلن بهاذ؟	السيدات بتقبلن هاظ؟
هل يمكننا ترك أشياءنا ما عدا الأشياء القيمة في الحافلة ؟	بنقدر نخلي اغراضنا هون، ماعيدا الأشياء الغالية، في الباص؟	ممكن نخلي أغراضنا اللي فيها قيمة بالباص؟
بمقدورك أن ترى واحداً عند " كارينجي هول " .	بامكانك تشوف واحد بقاعة كارنيجي.	ممكن تشوف واحد عند "كارينجي هول".
آسف جدا ، لكني أود تأجيل الميعاد .	آسف كثير، بس بدي أجل الموعد .	آسف كثير ، بس بدي أؤجل الموعد.
أجل , يمكننا القيام بخدمتك بداية من السابعة .	اها، منقدر نخدمك من الساعة السابعة.	اه, بنقدر نخدمك من الساعة سبعة.
على أي جانب من ميدان الاتحاد هي ؟	على اي جهة من دوار الاتحاد بتكون؟	على أي جهة من ميدان الاتحاد هي؟
أريد بعضاً من كريم التنظيف .	بدي شوية كريم تنظيف.	بدي شوية كريم تنظيف.
من فضلك لفها كل على حدة .	من فضلك غلفها كل وحدة لحالها .	لو سمحت لفها كل وحدة على حدة.
كود المنطقة هو ثلاثة . ورقم الهاتف هو اثنان ثلاثة أربعة ثلاثة أربعة صفر صفر .	رقم المنطقة ثلاثة. ورقم التلفون اثنين ثلاثة أربعة ثلاثة اربعة صفر صفر.	كود المنطقة هو ثلاثة. ورقم التلفون هو واحد ثلاثة ثلاثة ثلاثة أربعة صفر صفر.
كم عدد المرات التي سأغير فيها القطارات للوصول إلى هناك ؟	كم قطار رح اركب عشان أوصل هناك؟	قديش رح أغير القطارات عشان أصل هناك؟
هل تريد تسوية الفاتورة الآن ؟	راح تحاسب عالفاتورة هسا؟	بدك تسوي الفاتورة هسا؟
هل هذه السيارة الأجرة متاحة ؟	هاي التكسي فاضية؟	هاي السيارة متوفرة؟
هل يمكن أن تدلني على بعض الفنادق الرخيصة والنظيفة ؟	بصير ادلني عبعض الفنادق الرخيصة والنظيفة؟	بتقدر تدلني على فنادق رخيصة ونظيفة؟
أنا مع بعض الأصدقاء .	أنا مع شوية صحاب.	أنا مع بعض أصحابي.
لشخصين عند الساعة السابعة , الاسم وتاناب .	لشخصين الساعة سبعة. الاسم وتاناب.	لشخصين الساعة سبعة, الاسم و تاناب.
ما هو الإجمالي ؟	شو الإجمالي؟	شو هو الإجمالي ؟
أين يمكنني أن أشتري زلاجات وأحذية ؟	من وين بقدر اشتري زلاجات و أحذية؟	وين بقدر اشتري زلاجات وأحذية؟
ما وجه الاختلاف بين منتجك ومنتج منافسيك ؟	شو الفرق بين منتجك ومنتج الناس اللي بتنافسك؟	شو الفرق بين منتجك ومنتج منافسيك؟
أين تعلم السيد جونز اللغة اليابانية ؟	وين السيد جونز تعلّم اللغة اليابانية؟	وين بتعلم السيد جونز اللغة اليابانية؟
لا يمكنني وضع الأمتعة تحت المقعد . هل لك أن تحتفظ بها لأجلي من فضلك ؟	أنا ما بقدر أحط شنطي تحت المقعد. ممكن تخبيلي ياهم لو سمحت؟	ما بقدر احط الشناتي تحت الكرسي. بتقدر تخليها عشاني لو سمحت؟
هل يمكنك أن تستدعي موظفاً يتحدث اليابانية ؟	ممكن تنادي موظف بحكي بالياباني؟	بتقدر تستدعي حدا بحكي ياباني؟
سوف أبلغ الشرطة بذلك .	راح أبلغ الشرطة بهاظ الإشي.	رح أبلغ الشرطة.
عيد ميلادك اقترب .	عيد ميلادك قرب.	عيد ميلادك اقترب.
تعثر صديقي والتوي كاحله .	صاحبي وقع والتوى كاحله.	وقع صاحبي و وجع كاحله.
نعم , أعتقد ذلك .	اه، بتوقع هيك.	اه, بتوقع هيك.
اتجاه واحد .	اتجاه واحد.	اتجاه واحد.
هلاّ جعلت توقيعك هنا والحروف الأولى من اسمك هنا .	هات خلي توقيعك هون وأول حروف اسمك هون.	ممكن تكتبلي هون والكلمة الأولى من اسمك هون.
أين يمكن أن أوقف سيارتي ؟	وين ممكن أقف سيارتي؟	وين ممكن أوقف سيارتي؟
سأغلق الآن . شكراً على انتباهكم .	رح أسكر هسا. شكراً على انتباهكو.	رح أسكر هسا. شكراً على انتباهكم.
اللعنة . اللعنة . اللعنة . اللعنة . لقد كبرت معتاداً على وجهها .	يلعن. يلعن. يلعن. يلعن. أنا تعودت كثيرعلى وجهها.	اللعنة. اللعنة. اللعنة. كبرت معتاد عليها.
سنراك في الغد .	رح نشوفك بكرة.	رح نشوفك بكرا.
عندي ثلاثة أطفال .	عندي ثلاث ولاد.	عندي ثلاث أطفال.
نعم ، هي ، لأنك تستطيع أن ترى العلم أمام مكتب البريد .	صح، هي . لأنه بتقدر تشوف العلم قدام مكتب البريد.	اه ، هي ، لأنك بتقدر تشوف العلم جنب مكتب البريد.
هل تستطيع إنزال أمتعي إلى الردهة غداً صباحاً ؟	ممكن تنزل أغراضي على الردهة بكرة الصبح؟	بتقدر تنزلني عالغرفة بكرة الصبح؟
أربع ليالي .	أربع ليالي.	أربع ليالي.
دقيقة فقط ، من فضلك .	ديقة بس، لو سمحت.	دقيقة بس ، لو سمحت.
هل ستواجهني أية صعوبات في الجمارك ؟	راح ألاقي أي صعوبة بالتعامل مع الجمارك؟	رح تواجهني مشاكل بال الجمارك؟
هلا أخبرتني كيفية تعديلها من فضلك ؟	ممكن تحكيلي كيف اعدلها لو سمحت؟	ممكن تحكيلي كيف أغيرها لو سمحت؟
حسنا ، لا أعلم بعد لكنني سوف أحاول بالتأكيد .	ماشي، مش عارف لحد الآن بس رح أحاول أكيد.	تمام ، ما بعرفش بعد بس رح أحاول.
موعده المقرر هو الثامنة والنصف مساءْ بالتوقيت المحلي .	موعده هو الساعة ثمنية ونص المسا بالتوقيت المحلي.	موعده المقرر هو الساعة ثمانية ونص المسا بالتوقيت المحلي.
هل يمكن أن تضع حقيبة السفر هذه في صندوق السيارة .	ممكن لو سمحت تحطلي شنة السفر هاي بالطبون ؟	بتقدر تحط شنطة السفر هاي بصندوق السيارة؟
هذه ليست تفاحة ولكنها خوخة .	هاي مش تفاحة هاي خوخة.	هاي تفاحة بس خوخة.
إذا كان بالإمكان ، لم أكن لأخلع السنّة .	اذا ممكن، أنا بفضل ما تقلع السن.	لو سمحت ، ما كنت أخلع السنّة.
علي أن أفحص ذلك مع زوجتي .	لازم أشوف الموضوع مع مرتي.	لازم افحص هاد مع زوجتي.
لا أعتقد أن هذه السكينة نظيفة . أيمكنك أن تُحضر لي واحدة أخرى ؟	أنا ما بظن إنه هاي السكينة نظيفة. بتقدر تجبلي وحدة تانية؟	ما بتوقع هاي السكينة نظيفة. بتقدر تجيبلي وحدة ثانية؟
املأ البنود الآتية في بطاقة التسجيل .	املي البنود اللي جاية على كرت التسجيل.	املأ البنود التالية بالبطاقة.
ما الذي يمكن أن أراه في هذه الجولة ؟	شو بقدر أشوف بهاي الرحلة؟	شو ممكن أشوف هاي الجولة؟
هل هذا المتبل حار ؟	هاظ المتبل حار؟	هاد المتبل حار؟
هذه كلها مطبوعات .	هاي كلها مطبوعات.	هاي كلها مطبوعات.
هذه هديه لصديق .	هاي هدية لرفيقي.	هاي هديه لصاحبي.
أراهن بخمسة دولارات .	براهن بخمس دولارات .	براهن على خمسة دولارات.
هل توجد أية جولة صباحية ؟	في أي جولات صباحية؟	في جولة مسا؟
سنمكث .	راح نظل.	رح نضل.
هل توجد غرفة استراحة عامة بالقرب من هنا ؟	في غرفة استراحة عامة جنبنا هون؟	في غرفة استراحة عامة قريبة من هون؟
آسف ، لقد تحققت من إدارة الخدمة وإدارة المفقودات ولم أجدها عندهم .	بعتذر، تأكدت من إدارة الخدمة وإدارة المقودات وما لقيتها عندهم.	آسف، تأكدت من إدارة الخدمة وإدارة المفقودات ولم تلاقيها عندهم.
هل قلت لي كيف أذهب إلى المتحف ؟	قلتلي كيف بروح على المتحف؟	بتقدر تحكيلي كيف اروح على المتحف؟
لا أريد إنفاق أكثر من عشرين دولاراً .	ما بدي أصرف أكثر من عشرين دولار.	بدي أصرف أكثر من عشرين دولار.
هذا المكان مكتظ بالناسب ، أليس كذلك ؟	هاظ المكان معبى ناس، مش هيك؟	هاظ المكان مليح بالناس، صح؟
سأحضر المدرسة الصيفية بجامعة هاواي .	رح أداوم بالمدرسة الصيفية بجامعة هاواي.	بدي اجيب المدرسة الصيفية بجامعة هاواي.
من فضلك اعطني تصريحاً سارياً لمدة أسبوع .	لو سمحت أعطيني اذن لمدة أسبوع.	لو سمحت أعطيني تصريح ساري لمدة أسبوع.
ما هذا من فضلك ؟	شو هاظ لو سمحت؟	شو هاظ لو سمحت؟
سأحتاج إلى بطاقة ائتمان .	راح أحتاج الفيزا .	بدي بطاقة ائتمان.
إذن دعنا نبطنها من الداخل .	معناته خلينا نحشيها من جوا.	لو سمحت خلينا نبطنها من جوا.
هل هذه محطة قطار سريع ؟	هاي محطة اكسبريس؟	هاي محطة قطار سريع؟
من ثمانية إلى اثنى عشر من فضلك .	من ثمانية ل اثنعش لو سمحت.	من ثمانية ل إثنعش لو سمحت.
أود قياس بذلة السباق الخاصة بي .	بدي اقيس بدلة السباق تبعتي.	بدي أقيس جاكيتي للسباق.
لقد طلبته منذ وقت طويل .	طلبته من زمان.	طلبته من زمان.
أين الحمام ؟	وين الحمام؟	وين الحمام؟
اليابانيون لا يأخذون إجازات طويلة .	اليبانيين ما بيوخذو عطل طويلة.	اليابانيين ما بأخذوا إجازات طويلة.
هاهي .	هيها .	هاي هي.
أنها مناسبة تماما .	زابطة تماما.	هي مناسبة كثير.
مرحبا . هذه هي الخطوط الجوية المتحدة .	مرحبا . هاي هي الخطوط الجوية المتحدة .	مرحبا. هاي هي الخطوط الجوية المتحدة.
أعيش في شقة إيجارها ثمانون ألف ين في الشهر .	بعيش بشقة، الإجارتها ثمانين ألف ين بالشهر.	أعيش بشقة إيجارها مية ألف ين بالشهر.
هل هناك أماكن شاغرة بالنسبة لرحلة الخميس ؟	في أماكن فاظية برحلة يوم الخميس؟	في أماكن شاغرة لرحلة الخميس؟
أعرف نادي قديم لموسيقى الجاز بوسط البلد .	بعرف نادي قديم لموسيقى الجاز بوسط البلد.	بعرف نادي قديم لموسيقى الجاز بوسط البلد.
هل انعطف يساراً ؟	بدي ألف يمين؟	انعطف يمين؟
أحبه فعلاً .	بحبه فعلا.	بحبه فعلا.
من فضلك احفظ هذه الحقائب في محتجز الجمارك .	لو سمحت خلي هالشنتات بالجمارك.	لو سمحت احفظ هاي الشناتي بمستودع الجمارك.
هل يمكنني استخدام إِشارة ضوئية ؟	ممكن استعمل إشارة ضوئية؟	بقدر استخدم إشارة ضوئية؟
أعمل في شركة نشر .	بشتغل بشركة نشر.	بشتغل بشركة نشر.
اتجه يساراً في هذا الشارع ثم انعطف عند أول منعطف يمين .	روح يمين بهالشارع وبعدين اتوجه يمين عند اول منعطف.	روح يمين بالشارع يلي هاد الشارع بعدين انعطف عند أول تقاطع يمين.
بالفعل لدي أخبار . أنا سأتزوج .	فعلياً، عندي أخبار. أنا بدي أجوز.	فعلا عندي أخبار. أنا رح أتزوج.
واحد هامبرجر وواحد شيز برجر ، من فضلك .	واحد همبرقر وواحد شيز برقر، لو سمحت.	واحد هامبرجر وواحد شيز برجر ، لو سمحت.
أوه ، آسف . كانت هناك مشاكل ونحن نقوم بحلها ، هل تتفضل بالانتظار لمدة ثلاثين دقيقة ؟	أووه، أنا آسف. كان في مشاكل منحلها. ممكن تستنى لثلاثين دقيقة؟	اه ، آسف. كان فيه مشاكل و رح نقعد عليها لمدة ثلاثين دقيقة ؟
كم عددها ؟	كم عددها ؟	قديش عددها؟
و هو كذلك . سأوصلك إلى هناك .	و هو هيك . رح اوصلك لهناك.	هو هيك. رح أوصلك هناك.
أريد فندق أرخص قليلاً .	بدي فندق أرخص شوي.	بدي فندق أرخص شوي.
الأجدر بك أن تكف عن ذلك .	أحسنلك تبطل هالاشي.	لازم تكف عن هالحكي.
هل أي من المتاجر الكبيرة به يعمل الآن ؟	في أي مول فاتحة هسه؟	أي محل كبير فيه بشتغل هسا؟
كم تستغرق حتى تصبح متاحة .	قديش بدها حتى تصير فاظية .	قديش بدك وقت حتى تصبح متاحة.
معذرة . أريد أن أطلب طلب .	معلش . بدي أطلب طلب .	عفواً. بدي أطلب طلب.
عندنا حفلة مساء الجمعة . لماذا لا تنضم لنا ؟	عنا حفلة يوم الجمعة بالليل. ليش ما تيجي معنا؟	عنا حفلة مساء الجمعة. ليش ما تنضم معنا؟
كيف أستقلها ؟	كيف اركبهاا؟	شلون أركبها؟
هل هي جولة يوم كامل ؟	هي الرحلة ليوم كامل؟	هي جولة ليوم كامل؟
في أي وقت يمكنني مغادرة الفندق ؟	بأي ساعة ممكن أعمل خروج من الفندق؟	بأي وقت بقدر أروح على الفندق؟
أحضر لي بعض من الجبن المبشور .	هاتلي شوي من الجبنة المبروشة.	جيبلي شوية جبنة مبشورة.
هل لديك أحذية حريمي عند أصابع القدم ؟	عندك كنادر ستاتي مفتوحة من عند الأصابع؟	عندك أحذية حريمي عند أصابع القدم؟
هذه كبيرة جداً .	هاي كثير كبيرة.	هاي كبيرة كثير.
نبيذ غير حلو ، من فضلك .	واين بدون سكر، لو سمحت.	نبيذ مش حلو ، لو سمحت.
تبلغ الميزانية أقل من ألف دولار .	الميزانية أقل من ألف دولار.	بتكلف الميزانية أقل من ألف دولار.
إنها معطلة . هل تستطع فحص آلة التصوير هذه ؟	هاي معطلة. بتقدر تشيّك على آلة التصوير هاي؟	هي معطلة. بتقدر تفحص آلة التصوير هاي؟
لقد كان هناك حادث مرور .	كان في حادث سير.	كان فيه حادث.
إجمالي سكان اليابان حوالي مائة وثلاثين مليوناً .	العدد الكلي لسكان اليابان حوالي مية وثلاثين مليون.	إجمالي سكان اليابان حوالي مية وثلاثين مليون.
أي نوع من الملابس ؟	أي نوع من الأواعي ؟	شو نوع اللبس؟
في أي مجال كان من قبل ؟	بأي مجال هو كان قبل؟	بأي مجال كان قبل؟
كم تتكلف الليموزين للذهاب إلى وسط المدينة ؟	قديش تكلف الليموزين عشان نروح عوسط البلد؟	قديش بتكلف الليموزين عشان توصل لوسط البلد؟
الاسم هو جورو موتوياما . والرقم هو صفر ثلاثة ثلاثة اثنان ستة واحد اثنان أربعة تسعة خمسة .	الاسم هو جورو موتوياما . والرقم هو صفر ثلاثة ثلاثة اثنان ستة واحد اثنان أربعة تسعة خمسة .	الاسم جورو موتوياما. الرقم هو صفر ثلاثة ثلاثة ثلاثة ثلاثة ثلاثة ثلاثة ثلاثة أربعة ستة تسعة تسعة خمسة خمسة.
لا ، ولكن شكراً لك . إنني أشعر بتحسن .	لا، بس شكرًا هونيك. أنا حاسس انو صرت أحسن.	لا، بس شكرا الك. أنا بحس بتحسن.
هل لك أن نبدل مقاعدنا من فضلك ؟	ممكن نبدل كراسينا لو سمحت؟	ممكن نبدل مقاعدنا لو سمحت؟
هل هناك مكان يتم فيه عزف الموسيقي الريفية ؟	ما في أي مكان بعزف ألحان ريفية؟	في مكان بتعزف فيه الموسيقى الريفية؟
هلا أخبرتني قبل أن نصل إلى درهام ؟	بصير تخبرني قبل ما نوصل لـ درهام؟	ممكن تحكيلي قبل ما نوصل درهام؟
ظل سائراً عبر هذا الممر , وستجدها على الجانب الأيمن .	ظل ماشي بالممر هاذ , و رح تلاقيها عالجهة اليمين.	روح مشي عبر هاد الممر, وتلاقيها على الجانب الأيمن.
أشعر بصداع .	بحس بصداع.	بحس بصداع.
عامل الصيانة سيصعد في الحال .	عامل الصيانة راح يطلع مباشرة.	عامل الصيانة رح يطلع بسرعة.
هل تمانع في جلوسي هنا ؟	بتمانع لو اقعد هون؟	بتمانع أقعد هون؟
لقد قمت بزيارة البحيرات الكبرى لأول مرة .	هاي أول مرة بزور البحيرات الكبرى.	جبت البحيرات الكبرى لأول مرة.
أصبت بالتهاب في الحلق .	التهب حلقي .	صابتني التهاب بالحلق.
نسافر جواً ثلاث مرات في الأسبوع ، أيام الثلاثاء والجمعة والسبت .	بنسافر بالطيارة ثلث مرات بالأسبوع، الثلاثاء، الجمعة والسبت.	بنسافر جوا ثلاث مرات بالأسبوع، أيام الثلاثاء والجمعة والسبت.
نعم . أيقظني من النوم بعد ثلاثة ساعات , من فضلك .	أيوة . صحيني من النوم بعد ثلاث ساعات, لو سمحت.	اه. صحيني من النوم بعد ثلاث ساعات, لو سمحت.
إلى أين يجب علي أن أنقل ؟	لوين لازم أحول؟	وين لازم اركب؟
لا أعرف كثيراً عن النبيذ ؟ ماذا يناسب هذا الطبق ؟	أنا ما بعرف كثير بالواين. شو بنفع مع هاذ الأكل؟	ما بعرف كثير عن النبيذ؟ شو يناسب هاد الطبق؟
وللشرب ؟ .	بتشرب إشي ؟ .	للشرب؟
نعم ، هذا لا يشمل الوجبات .	أيوة، هاذ ما بشمل الأكل.	اه ، هاد مش يشمل الوجبات.
قمة جبل " فوجي " هي اعلي قمة جبلية في اليابان حيث يبلغ ارتفاعها ثلاثة آلاف وسبعمائة وستون مترا .	جبل فوجي هو أعلى قمة باليابان على ارتفاع ثلاثة ألاف وسبعمية وستين متر.	قمة جبل " فوجي " هي أعلى قمة جبلية باليابان حيث يبلغ ارتفاعها ثلاثة آلاف و ثمانين متر.
هل يمكن أن ترسل أحدا ؟	ممكن تبعت حدا؟	ممكن تبعث حدا؟
هل من الممكن أن تفصل أكثر ؟	يتقدر توضح أكثر ؟	ممكن تفصل أكثر؟
أريد واحدة حديثة .	بدي وحدة جديدة.	بدي وحدة حديثة.
حسنا ، ولكن ليس منطقة المقاعد المكشوفة . فاليوم شديد الحرارة .	طيب ، بس مش على مكان الكراسي المكشوفة. اليوم كثير شوب.	تمام ، بس مش منطقة الكراسي المكشوفة. اليوم شديد الحرارة.
سأرسلها لك ، لذا من فضلك انتظر هنا .	راح أبعثها الك، عشان هيك استنى هون لو سمحت.	رح ابعثلك اياها، لو سمحت اصبر هون.
أخشى أن يكون هناك خطأ في الفاتورة .	خايف يكون في غلط بالفاتورة.	خايف يكون فيه غلط بالفاتورة.
هذا بارد إلى حد ما . هل يمكن أن تقوم بتسخينه ؟	هاظا بارد شوي. ممكن تسخنه؟	هاظ بارد شوي. بتقدر تسخينه؟
هلا راقبت حقيبتي من فضلك ؟	ممكن تراقبلي شنتي ، لو سمحت؟	ممكن تشوف شنتتي لو سمحت؟
لا امتلك أي نقود .	ما معي مصاري.	ما عندي مصاري.
أريد عامل تشغيل يتحدث اليابانية من فضلك .	بدي شغيل بيحكي ياباني لو سمحت.	بدي عامل تشغيل بحكي ياباني لو سمحت.
يبدو أنها نادرة جداً .	شكلها نادرة كثير.	شكلها نادرة كثير.
إنني على يقين أن المجرم قريب .	أنا متأكد إنه المجرم قريب.	أنا متأكد إنو المجرم قريب.
أجل ، أظن أني سوف أنظر .	ايوا، بظن إني رح اطلع.	اه ، بظن اني رح اشوف.
هل يوجد أحد يستطيع العزف على البيانو ؟	في أي حدا بعرف يعزف عالبيانو؟	في حدا بعزف على البيانو؟
لستُ معتمداً قانونياً .	أنا مش مؤهل.	مش معتمد قانوني.
هل يمكنك أن توصل أمتعتي إلى الغرفة ؟	ممكن توصل اغراضي للغرفة؟	بتقدر توصل اغراضي للغرفة؟
هل الشوارع الخلفية خطر ؟	الشوارع الخلفية خطرة ؟	الشوارع الخلفية خطر؟
هل لك أن توقظني في تمام السادسة من فضلك ؟	بتقدر تصحيني الساعة ستة، لو سمحت؟	ممكن توقظني الساعة ستة لو سمحت؟
أشعر بحالة سيئة وغثيان .	حاس بلعية ووظعي زفت.	حاس حالي كويس وغثيان.
لقد اتصلت منذ ثلاثة أيام بخصوص حقيبة ضائعة .	اتصلت من ثلاث أيام عشان شنتة ظايعة.	اتصلت من ثلاث ايام بخصوص شنطة ضيعتها.
بضع دقائق أخرى من فضلك .	كم دقيقة كمان اذا سمحت.	شوي دقائق ثانية لو سمحت.
لم أدرك الرحلة رقم عشرون المتجهة إلى سان فرانسيسكو .	ما لحقت الرحلة رقم عشرين اللي رايحة عسان فرانسيسكو.	ما فهمت الرحلة رقم عشرين اللي رايحة على سان فرانسيسكو.
آه ، عندك ؟ بالتأكيد إن لديك تشكيلة كبيرة .	أها، عندك؟ طبعا إنت عندك تشكيلة كبيرة.	آه ، عندك ؟ أكيد عندك تشكيلة كبيرة.
بطريقة أبطأ ، من فضلك .	بشكل أبطأ ، لو سمحت.	بطريقة أبطأ ، لو سمحت.
إنه لا يلائمني .	مش مناسبني.	مش مناسبني.
هل من الممكن إجراء اتصال على أن يتم تحصيل أجرته من الطرف الآخر ؟	ممكن أعمل مكالمة وتوخذوا حقها من الطرف الثاني؟	ممكن أحكي على أني أدفع حق الطرف الثاني؟
عندك أية شيء يمكن أن أتعاطه للطفح الجلدي ؟	عندك أي اشي ممكن آخذه عشان هاذ الطفح الجلدي؟	عندك إشي ممكن أتعاطه للطفح الجلدي؟
هل تفضلت و احتسيت القهوة معي ؟	تتفضل و تشرب قهوة معي؟	تفضلت و شربت القهوة معي؟
سأقوم بتسجيل الدخول في تمام الساعة الثامنة مساءاً تقريباً .	راح أنزل بالفندق حوالي الساعة ثمنية المسا .	رح أسجل الدخول الساعة ثمانية المسا تقريباً.
إننا على ارتفاع اثني عشر ألف قدم .	احنا على ارتفاع اتناشر ألف قدم.	إحنا على ارتفاع اثني عشر ألف قدم.
لقد تمتعت بإقامتي . شكراً لك .	انبسطت بإقامتي . شكراً الك.	استمتعت بقامتي. شكراً الك.
أُفضلُ حجرة هادئة .	بفظل غرفة هادية.	بفضل غرفة هادئة.
كان يجب تدبير وسيلة مواصلات . ذاهبة إلى بوسطن .	لازم ندبر طريقة أو سيارة رايحة على بوسطن.	لازم نجهز وسيلة مواصلات. رايحة على بوسطن.
لقد سرق مسجل الفيديو من غرفتي .	سرقو مسجل الفيديو من غرفتي.	سرق مسجل الفيديو من غرفتي.
هذا هو طبقنا المميز , سمك موسى المشوي الخاص بدوفر .	هاذ طبقنا الخاص, سمك موسى المشوي الخاص بدوفر.	هاد هو طبقنا المميز, سمك موسى المشوي الخاص بدوفر.
هل يمكن أن أختر جريدة يابانية , من فضلك ؟	ممكن اختار جريدة يابانية، لو سمحت؟	ممكن أختر جريدة يابانية, لو سمحت ؟
هل لي أن أقاطعكم ؟	ممكن أقاطعكم؟	بقدر أقاطعكم؟
هل يوجد بالقرب من هنا مطعم صيني ؟	في مطعم صيني قريب من هون؟	في قريب من هون مطعم صيني؟
لا أريد أي شيء يكون كبير الحجم .	ما بدي أي اشي ظخم.	بدي اشي يكون كبير.
هل أنت الأخير في هذا الصف ؟	إنت الأخير بهاذ الصف؟	انت الاخير بهاد الصف؟
إن محفظتي نشلت في القطار .	وحدة سرق محفظتي في القطر.	محفظتي انسرقت بالقطار.
