# Supplementary material for: Exploring prompting for dialectical machine translation: a focus on north Jordanian Arabic
Source: PeerJ journal article supplement (doi:10.7717/peerj-cs.3209), 2025-11-12
Supplement: Code.zip [file sultan_arabicT5_prediction.xlsx]

## Sheet: Sheet1
MSA	IrbidDial	T5
ما رأيك في مشاهدة فيلم آخر ؟	شو رأيك نشوف فيلم ثاني؟	ما رأيك في مشاهدة فيلم آخر ؟
أريد كوبا من الماء لأتناول بعض الدواء , من فضلك .	بدي كاسة مي عشان اوخذ الدوا، لو سمحت.	أريد كوباً من الماء لتناول الدواء ، من فضلك.
أبغي كرة .	بدي طابة.	أريد طابة.
كيف تحب أن يصفف شعرك اليوم ؟	كيف بدك يسرحلك شعرك اليوم؟	كيف تريد أن يقص شعرك اليوم ؟
أريد رداءا ذات أكمام طويلة .	بدي جاكيت كم طويل.	أريد جاكيت طويل.
ها-ها . صباح الخير حان دورك . إنه على ما يرام .	هههه. صباح الخير صار دورك. هو كويس.	هاهي. صباح الخير صار دورك.
أين نتقابل ؟	وين بدنا نتلاقى؟	أين سنتقابل ؟
لقد أثلج صدري زيارة مقاركم الرئيسية وكذا ما جرى بيننا من مناقشات مهمة . شكراً جزيلاً على ما أبديتموه من تعاون .	فرحت كتير لما زرت مكاتبكم الرئيسية وكمان النقاشات الهمة اللي صارت بيناتنا. كتير شكراً على العون اللي قدمتوه.	لقد سعدت كثيراً عندما زرت مكاتبكم الرئيسية وكذلك المناقشات الجادة التي دارت بيننا. شكراً على العون الذي قدمته.
هل هذا قطار مباشر ؟	هاذ القطار مباشر؟	هل هذا القطار مباشر ؟
إبريق من القهوة ، لطفاً .	بكرج قهوة، لو سمحت.	أتناول قهوة ، من فضلك.
كم تكلفة الإفطار ؟	بقديش الفطور ؟	ما هو الإفطار ؟
من فضلك اختر لي مائدة ذات منظر ليلي لطيف .	من فظلك إختارلي طاولة مع منظر حلو بالليل.	من فضلك اختار لي مائدة جميلة الليلة.
أين الحلاق ؟	وين الحلاق؟	أين الحلاق ؟
الشاطئ أسفل يمينا . ياله من منظر رائع .	الشط تحت على اليمين. شو المنظر بجنن.	الشاطىء أسفل على اليمين. إنه جميل حقاً.
كلاً ، إنهم متينين جداً .	لا، هظول كثير قويات.	لا ، هؤلاء قويون جداً.
اتجه يسارا عند الناصية الثالثة .	روح يسار من عند الدخلة الثالثة .	اتجه يساراً من عند المدخل الثالث.
أين المحطة النهائية للحافلة ؟	وين اخر موقف للباص؟	أين آخر موقف للحافلة ؟
كم يتقاضى المرشد في اليوم ؟	قديش بيوخذ الدليل باليوم؟	كم يتقاضى الدليل في اليوم ؟
أريد كيساً من الفشار ، من فضلك .	بدي كيس بوشار، لو سمحت.	أريد كيس بوشار ، من فضلك.
من فضلك غير خمسين آلاف ين إلى دولارات أمريكية .	لو سمحت اصرف الخمسين ألف ين لدولر أمريكي.	من فضلك اصرف خمسين ألف ين إلى دولارات أمريكية.
أريد قاموس جيب ، من فضلك .	بدي قاموس بنحط بالجيبة ، لو سمحت.	أريد قاموساً يوضع في الحقيبة ، من فضلك.
من فضلك ، أريد فنجاناً من القهوة البيضاء .	لو سمحت ، بدي فنجان قهوة بالحليب.	من فضلك ، أريد فنجاناً من القهوة بالحليب.
هل يمكن أن أحصل على قمصاني نظيفة غداً صباحاً ؟	ممكن ألاقي قمصاني نظيفات بكرا الصبح؟	هل يمكن أن أجد قمصاني نظيفة غداً صباحاً ؟
حسنا , حجرتك يا آنسة هي رقم تسعة صفر ثمانية . هذا مفتاحك .	طيب، غرفتك يا آنسة هي تسعة صفر ثمنية. هاذ مفتاحك.	حسناً ، غرفتك يا سيدتي هي تسعة صفر ثمانية. هذا مفتاحك.
نعم ، بالطبع .	أيوا، أكيد.	نعم ، بالتأكيد.
ما تكلفة المقاعد الخاصة بالشرفة ؟	قديش بتكلف الكراسي تبعت البرندة؟	كم تتكلف المقاعد التي تتبع البرندة ؟
هل لي بدليل سياحي ؟	ممكن مرشد سياحي؟	هل يمكن أن يكون مرشد سياحي ؟
أجل ، وأودّ محاسبة المطلوب هاتفياً على قيمة المكالمة .	صح، وأنا بدي احاسب يلي رنيت عليه على حق المكالمة.	حسناً ، أنا أريد محاسبة من اتصلت به على أجر المكالمة.
جلد التمساح الأمريكي .	جلد التمساح الأمريكي.	جلد التمساح الأمريكي.
سأكون هنا الساعة الثامنة إلى الربع .	رح أكون هون الساعة ثمانية إلا ربع.	سأكون هنا في الساعة التاسعة والنصف.
أظن أن الملابس المصنوعة في اليابان قد جرى تفصيلها على نحو أفضل بالتأكيد .	بتوقع انو الأواعي اللي صنعت في اليابان تفصلت بطريقة أحسن أكيد.	أعتقد أن الملابس التي صنعت في اليابان قد فصلت بطريقة أفضل بالتأكيد.
سأكون هناك حوالي السادسة مساءً .	راح أكون هناك حوالي الساعة ستة المسا.	سأكون هناك حوالي الساعة السادسة مساءاً.
لا أجيد الإنجليزية . هل ثمة من يتحدث اليابانية هنا ؟	أنا مش بعرف أحكي إنجليزي. في حدا بحكي ياباني هون؟	أنا لا أستطيع التحدث الإنجليزية. هل يوجد شخص يتحدث اليابانية هنا ؟
إنني أتصل من كشك عمومي في ماسي .	أنا بحكي معك من كشك عام بماسي.	أنا أتحدث إليك من كشك عام في ماسي.
كم الوقت ؟	قديش الساعة؟	كم الساعة ؟
إنني أبحث عن هذا .	أني بدور على هاظ.	أنا أبحث عن هذا.
لماذا لا تعطيها هدية ؟	ليش ما تعطيها هدية؟	لماذا لا تعطيها هدية ؟
استمتعنا بالعشاء .	كيفنا عالعشا.	كيف حالنا في العشاء ؟
سأذهب بك على مقعدك . من هنا ، من فضلك .	راح اوديك على كرسيك. من هون، لو سمحت.	سأساعدك على مقعدك. من هنا ، من فضلك.
سأعود إليك عندما تكون أقل انشغالاً .	راح أرجعلك بس تكون مش مشغول كثير.	سأعود لك عندما تكون مشغولاً جداً.
أنا السيد تكاهاشي بالغرفة رقم خمسة تسعة وأربعين . من فضلك أرسل أربع زجاجات من بيرة بودفايزر .	أنا الأستاذ تكاهاشي بالأوضة رقم ٥٩ . لو سمحت بدي أربع بطولين من البيرة بودفايزر.	أنا السيد تكاهاشي في الصورة رقم . من فضلك أريد أربعة بطولين من البيرة بودفايزر.
حسنا ، إنه وقت الغداء . هل تحب أن نناقشه على الغداء ؟	ماشي، وقت الاكل صار. بتحب نحكي عنها واحنا ناكل؟	حسناً ، وقت الطعام قد انتهى. هل تحب أن نتحدث عنها ونحن نأكل ؟
هناك الكثير من الينابيع الحارة .	في كثير ينابيع حارة.	هناك الكثير من الينابيع الحارة.
سر مباشرة ، من فضلك .	روح ع طول، لو سمحت.	اتجه إلى الأمام ، من فضلك.
هل تمانع إذا التقطت صورة لك ولسيارتك الأجرة ؟	بتمانع لو أخذت صورة إلك وللتكسي تبعتك؟	هل تمانع في أخذ صورة لك وللحافلة الخاصة بك ؟
كم من الوقت نحتاج للذهاب مشياً من هنا إلى مبنى البلدية ؟	قديش بدنا وقت عشان نمشي من هون لبناية البلدية؟	كم من الوقت يستغرق السير من هنا إلى مبنى البلدية ؟
هل تستطيع أن تخفض سعرها لوجود بعض البقع بها ؟	بتقدر ترخصها لأنه في عليها شوية بقع؟	هل يمكنك أن ترخصها لأن بها بعض البقع ؟
شكراً ، هذا يكفي .	شكراً ، هاظ بكفي.	شكراً ، هذا يكفي.
أريد الشخص الذي يعد وثائق عادية في حجم ورقة الخطاب بدون الحاجة إلى طيهم .	بدي الشخص اللي بعمل الوثائق اللي بحجم الورق العادي بدون ما يظطر يثنيهم.	أريد الشخص الذي يقوم بعمل الوثائق الورقية بحجم الورق العادي دون أن يضغط على ذلك.
هل نحتاج إلى طرح هذا للتصويت ؟ إن لم نكن في حاجة إلى هذا ، فإمكاني أن أعتقد حينئذ أننا قد وصلنا إلى نتيجة , سأقوم بإرسالها إلى مجلس إدارتنا صباح غد .	هل احنا محتاجين نحط هاظ للتصويت؟ اذا لأ، بتوقع أنه وصلنا للنتيجة، بدي أبعثها لمجلس ادارتنا بكرا الصبح.	هل نحن بحاجة إلى وضع هذا للتصويت ؟ إذا لم نصل إلى النتيجة ، أعتقد أننا وصلنا إلى النتيجة ، سأرسلها إلى مجلس إدارتنا غداً صباحاً.
أين مترو الأنفاق ؟	وين المترو؟	أين المترو ؟
كنت أفكر في الحصول على هذه الدورة في فترة نصف العام المقبلة .	كنت بفكر أوخذ هالكورس بفترة نص السنة الجاية.	كنت أفكر في أخذ هذا الكورس في النصف الأول من العام القادم.
الخامس عشر من سبتمبر يوم احترام المسنين .	خمسطعش تسعة هو يوم احترام المسنين.	خمسة عشر تسعة هو يوم احترام المسنين.
ارفعوا أيديكم .	ارفعوا إيديكو	ارفعوا يدكم.
أين موقف الحافلات ل بي ؟	وين مجمع الباصات ل بي ؟	أين محطة الحافلات بي ؟
قم بدفعها من فضلك , إن كان ذلك ممكنا .	لو سمحت دزها , إذا بصير	من فضلك دزها ، من فضلك.
لقد نسيت أن آخذ حقيبتي اليدوية .	نسيت آخذ شنتة الإيد.	نسيت أن آخذ حقيبة اليد.
فكرة صائبة . متى تخطط للمجيء ؟	فكرة صحيحة. متى بتنوي تيجي؟	فكرة صحيحة. متى ستأتي ؟
اثنان ويسكي مع الماء , من فضلك .	تنين ويسكي مع مية, لو سمحت.	تنين ويسكي مع الماء, من فضلك.
على فكرة , هل أنت غير مشغول السبت القادم ؟	بالمناسبة، راح تكون فاضي السبت الجاي؟	بالمناسبة ، هل ستكون مزدحمة يوم السبت القادم ؟
هل لديك هذا باللون الأخضر الداكن ؟	عندك هاذ باللون الاخضر الغامق؟	هل لديك هذا باللون الأخضر الغامق ؟
هالو ، هل هذه تعود إلى روي ؟	مرحبا، هاي لروي؟	مرحبا ، هل هذه لري ؟
أريد حامل ثلاثي .	بدي حامل ثلاثي.	أريد حامل ثلاثي.
عظيم . كنت أبحث عن سيارة أجرة لكن هذا أفضل .	كتير حلو. كنت قاعد بدور على تاكسي بس هاي احسن.	إنه جميل جداً. كنت أبحث عن سيارة أجرة ولكن هذه أفضل.
ثلاثة اثنان واحد اثنان . انتظر ثانية ، حسنا ؟ أريد أن أرسل لك شيئاً هنا . معذرة .	ثلاثه اثنين واحد اثنين. استناني شوي , طيب؟ بدي أبعثلك اشي هون. اعذرني.	ثلاثة اثنان واحد اثنين. سأرسل شيئا هنا. عذراً.
حسنا ، إنه باهظ الثمن . إنه لم يصنع في اليابان ، أليس كذلك ؟	تمام ، هو غالي .اكيد مش صنع اليابان، مش؟	حسنا ، إنه غالي. بالتأكيد ليس من صنع اليابان ، أليس كذلك ؟
ويسكي اسكتلندي وماء من فضلك .	ويسكي اسكتلاندي ومية لو سمحت.	ويسكي اسكتلندي مائة من فضلك.
هل توجد أية كازينوهات جيدة ؟	في أي كازينوهات حلوة؟	هل توجد أية كازينوهات جميلة ؟
إنها عاملتني كما لو كنت متسولاُ .	عاملتني كإني شحاد.	لقد عاملتني كشحاد.
شخص ما فتح الطرد الخاص بي .	في حد فتح الطرد تبعي.	هل يوجد أي شخص يفتح الطرد الخاص بي.
هل تريد أن افحص موتور السيارة ؟	بدك ياني أفحص ماتور السيارة؟	هل تريد أن أفحص مقود السيارة ؟
أنا في نزهة طويلة سيرا على الأقدام .	أني طالعة برحلة طويلة تمشاية عجري.	أنا ذاهب في رحلة طويلة إلى مسقط رأسي.
هذه الأيام ، استخدم الكمبيوتر بشكل دائم في العمل .	هاي الأيام ، أنا بستخدم الكمبيوتر دايماً بالشغل.	هذه الأيام ، أنا استخدم الكمبيوتر دائماً في العمل.
موظفو المبيعات في هذا المتجر لطفاء جداً .	موظفين المبيعات بهاذ المحل لطيفين كثير.	موظفي المبيعات في هذا المتجر لطيفون جداً.
الثاني من على اليسار .	الثاني عالشمال .	الثاني في الشمال.
هل أنزل هنا لمركز روكفيلر ؟	أنزل من هون عمركز روكفيلر؟	هل أنزل هنا في مركز روكفيلر ؟
هذه السيدة كاوازو في غرفة رقم ستة عشر أحدى عشر .	هاي الست كاوازو بالغرفة سطعش إحدعش.	هذه السيدة كاوازو في الغرفة الثانية عشر.
هل تستطيع خفضها حتى عشرين دولار ، من فضلك ؟	بتقدر تنزلها لعشرين دولار، لو سمحت؟	هل يمكنك أن تنزلها إلى خمسين دولاراً ، من فضلك ؟
أشعر بتحسن .	حاس بتحسن.	أشعر بتحسن.
هل يمكنكم صرف الشيك ذو المائتي دولار الخاص بي ؟	بتقدروا تصرفولي الشيك أبو الميتين دولر تاعي؟	هل يمكنكم أن تصرفوا لي الشيك بقيمة مائة دولار أمريكي ؟
ولكن لا ضرورة لدفع بقشيش .	بس ما في داعي للبخشيش.	لا داعي للبخشيش.
لقد جاء لتوه .	جا هسا.	إنه قادم الآن.
لنتصل به .	خلينا نرلنه.	دعنا نردده.
بالمناسبة ، اسمي هيروش إيجيما .	بالمناسبة، اسمي هيروشي ايجيما.	بالمناسبة ، اسمي هيروشي إيجيما.
التاسع والعشرون من أغسطس .	تسعه وعشرين من آب.	تسع وعشرون من آب.
هل لا زال لديكم مقاعد لعرض الليلة ؟	ظل في عندكم محلات لعرض الليلة؟	هل يوجد لديكم أية متاجر لعرض الليلة ؟
أريد القيام بحجز للساعة الثالثة والنصف ظهراُ .	بدي أعمل حجز للساعة ثلاثة ونص الظهر.	أريد عمل حجز للساعة الثالثة والنصف ظهراً.
سوف نحضرها الآن . ما هو رقم غرفتك ؟	رح نجيبها هلا . شو رقم غرفتك ؟	سنحصل عليها الآن. ما هو رقم غرفتك ؟
رقم غرفتي هو ثلاثة ستة وعشرين . هل يمكن أن تأخذ الغسيل ؟	رقم غرفتي هو ثلاثة ستة وعشرين. بصير توخذ الغسيل؟	رقم غرفتي هو ثلاثة ستة وعشرين. هل يمكن أن تأخذ الغسيل ؟
أليس لديك دروس تجريبية ؟	ما عندك كورسات تجريبية؟	هل لديك أي كورسات تجريبية ؟
رحلة الطيران دلتا رقم ثمانية وعشرون والمتجهة إلي نيو أورلينز سوف تتأخر حوالي ساعة .	رحلة الطيارة دلتا رقم ثمانية وعشرين اللي رايحة على نيو أورلينز حتى تتأخر حوالي ساعة.	رحلة طيران دلتا رقم ثمانية وعشرين المتجهة إلى نيو أورلينز لتتأخر حوالي ساعة.
هل لديكم غرفة متاحة الليلة ؟	عندكم غرفة فاضية الليلة ؟	هل لديكم غرفة متاحة الليلة ؟
بصراحة ، لا أتفق مع ذلك .	بصراحة، ما بتفق مع هاظ.	بصراحة ، لا أتفق مع هذا.
هل لك أن تتفضل وتملأ هذه ؟	بتقدر تتكرم و تعبي هاي؟	هل يمكنك أن تزكي هذه ؟
يبدو أن النقود التي أعطيتني إياها ناقصة عشر دولارات .	شكله المصاري اللي إنطيتني اياها ناقصة عشر دولارات.	يبدو أن النقود التي أعطيتني إياها ناقصة عشرة دولارات.
بالخارج .	برا.	براً.
أريد ما يخصني لكي أرحل .	بدي اللي بخصني مشان أروح.	أريد ما يخصني فقط للذهاب.
هل يمكن أن ترسلها إلى عنواني في اليابان عن طريق بريد الطرود الدولي وتحصل الثمن من هناك ؟	ممكن توديها على عنواني باليابان عن طريق صفحة الطرود الدولي و توخذ حقه من هناك ؟	هل يمكنك أن ترسلها إلى عنواني في اليابان عن طريق صفحة الطرود الدولية وتتحصل عليه من هناك ؟
أين قسم السيدات ؟	وين قسم النسوان؟	أين قسم النساء ؟
إنه ألم حاد .	هو وجع قوي.	إنه ألم شديد.
إنني في نفس السن .	أني بنفس العمر.	إنني في نفس العمر.
فكرة جميلة .	فكرة حلوة.	فكرة جيدة.
هل الأجانب يمكنهم الحصول على الكتب في المكتبة ؟	بقدروا الأجانب يستخدموا الكتب بالمكتبة؟	هل يمكن أن يستخدموا الكتب في المكتبة ؟
تحية . أنا جون .	مرحبا. أني جون.	مرحبا. أنا جون.
هل يمكن أن نبدأ اللعب عندما ينتهون ؟	بنقدر نبلش نلعب لما يخلصوا؟	هل يمكننا أن نمارس اللعب بعد انتهاء المباراة ؟
مائة وخمسة وثلاثون ين للدولار الواحد .	مية وخمسة وثلثين ين للدولار الواحد.	مائة وخمسة وثلثين ين للدولار الواحد.
نعم . انتظر , سوف احضر لك واحدة .	طيب. استنى، راح أجيبلك وحدة.	حسناً. انتظر ، سأحضر لك واحدة.
هلا أنزلتني عند فندق هلتون من فضلك ؟	ممكن تنزلني عند فندق الهيلتون لو سمحت؟	هل يمكنك أن تنزلني عند فندق هيلتون من فضلك ؟
أين الاستعلامات الرياضية ؟	وين الاستعلامات الرياضة؟	أين الاستعلامات الرياضية ؟
هذه هي فلوس أقلام الحبر . فاتورة بمائة دولار .	هايذ حق قلام الحبر. فاتورة بمية دولار.	هذا ثمن قلم الحبر. فاتورة بمبلغ مائة دولار.
لا ، شكراً . من الأفضل أن لا أشرب المزيد .	لا، شكراً. احسنلي ما أشرب اكثر من هيك.	لا ، شكراً. أفضل لي ألا أشرب أكثر من ذلك.
بما في ذلك الإفطار ، والضريبة ، ورسم الخدمة ، سيكون الحساب خمسة أربعون دولارا للشخص الواحد في الليلة .	بتشمل الفطور، الضرايب، ورسم الخدمة، الحساب رح يكون خمسة وأربعين دولار للواحد في الليلة.	تشمل الإفطار ، الضرائب ، ورسم الخدمة ، وحساب الخدمة ، وحساب الخدمة ، وحساب الخدمة سيكون خمسة وأربعين دولاراً للشخص في الليلة.
ما عرض الأوبرا اليوم ؟	شو عرض الأوبيرا اليوم؟	ما هو عرض الأوبيرا اليوم ؟
أريد مقعداً يطل على الممر ، من فضلك .	بدي كرسي يطل عالممر، لو سمحت.	أريد مقعدا يطل على الممر ، من فضلك.
أجل أريد شيئاً أقرؤه .	أيوا بدي إشي أقراه.	نعم ، أريد شيئاً أقرأه.
غير محتمل بدرجة كبيرة .	بنطاقش بدرجة كبيرة.	إنه ليس متاحاً بدرجة كبيرة.
هل تعرف المطعم يا كيويا ؟	بتعرف المطعم يا كيويا؟	هل تعرف المطعم يا كيويا ؟
يستطيع الصرافون أن يغيروا دولاراتك من أجل بقشيش الكازينو . هل نذهب ؟	السمسارين بقدروا يصرفولك الدولرات عشان بخشيش الكازينو. بصير نروح؟	السمسارين يمكنهم صرف آلاف الدولارات مقابل بخشيش الكازينو. هل يمكن أن نذهب ؟
يسعدنا أن نقدم لك الشراب الذي تريده متبوعاً بالغداء . دليل كامل بالمشروبات التي نقدمها على رحلتنا موجودة في دليل المعلومات الخاص بمجلتنا .	بسعدنا إنه نقدملك العصير اللي بتختاره وبيلحقه الغدا . منوفر قائمة كاملة من الشراب في هاي الرحلة موجودة بقسم المعلومات تاع مجلتنا.	يسعدنا أن نقدم لك العصير الذي تختاره ويلحقه الغداء. قائمة كاملة من الشراب في هذه الرحلة متاحة في قسم المعلومات الخاص بمجلتنا.
هل أستطيع تأجير أداة للتنفس أثناء السباحة ؟	بقدر أستأجر شغلة للتنفس خلال السباحة؟	هل يمكن أن أستأجر غرفة للتنفس خلال السباحة ؟
آه . هل يمكنني الحصول على وجبتي فيما بعد ؟ أنا أشعر أنني لست على ما يرام الآن .	ممم. ممكن أخد وجبتي بعدين؟ حاسس حالي مش على بعضي هسا.	معذرة. هل يمكنني أن آخذ وجبتي الآن ؟ أشعر أنني لست على وفاق الآن.
ما هو رقم الرحلة الجوية ؟	شو رقم رحلة الطيران؟	ما هو رقم رحلة الطيران ؟
أبغي تأجير سيارة من هذا الطراز لمدة يومين .	بدي استأجر سيارة من هاذ الموديل لمدة يومين.	أريد استئجار سيارة من هذا الطراز لمدة يومين.
أنا غير متأكد إذا كنت قد حزمت ملابس كافية لرحلة مدتها ثلاثة أيام .	أنا مش متأكد اذا جهزت وعية بتكفيني لرحلة مدتها ثلاث أيام.	أنا لست متأكداً إذا ما كنت قد أعددت حقيبة تكفي لرحلة مدتها ثلاثة أيام.
يوجد بجانب هذا المبني تحديداً .	هو جنب هاذ المبنى بالتحديد .	إنه بجوار هذا المبنى بالتحديد.
هه . هذه . يبدو اللون جميلاً عليك .	هه. هاي. شكل اللون حلو عليك كثير.	هاهي. هذا لون جميل جداً.
هل أستطيع تناول غذائي الآن ؟	ممكن أوكل هسا؟	هل يمكنني تناول الطعام الآن ؟
هل يتوقف القطار في برايتون ؟	بوقف القطار عند برايتون؟	هل يتوقف القطار عند برايتون ؟
من المهم جدا أننا نستطيع الوصول إلى المواد الخام التي نحتاجها في المشروع .	اشي كثير مهم إنه قدرنا نوصل لمجموعة المواد الأساسية اللي راح نحتاجها للمشروع.	شيء عظيم أن نتمكن من الوصول إلى قائمة المواد الأساسية التي نحتاجها للمشروع.
أود أن أطلب بدلة داكنة من أجلي .	بدي أطلب بدلة لونها غامق عشاني.	أريد أن أطلب بدلة لونها داكن.
هذا جيد . متى هو ؟	هيك تمام. متى رح يكون؟	هذا حسن. متى سيكون ؟
أرغب في شراء شامبو .	أنا بدي أشتري شامبو.	أنا أريد شراء شامبو.
خمسون جنيهاً .	خمسين قنيه.	خمسين جنيهاً.
لا يوجد رسم ضروري .	مش موجود رسم ظروري.	ليس هناك رسم ضروري.
هل كان لديك أية خدمات أخرى إلى جانب طعام الإفطار هذا الصباح ؟	في عندك أي خدمات ثانية غير فطور الصبح؟	هل لديك أي خدمات أخرى غير وجبة الإفطار الصباحية ؟
متى يفتح المصرف ؟	أميت بفتح البنك؟	متى يفتح البنك ؟
إجمالي المبلغ المطلوب مائتان وثلاثة وأربعون جنيه ، يا سيدتي .	المبلغ الكلي بطلع ميتين وثلاثة وأربيعين جنيه، يا مدام.	المبلغ الإجمالي يبلغ حوالي ثلاثة وثلاثون جنيهاً ، يا سيدتي.
لماذا لم يأت إلى الحفلة أمس ؟	ليش ما اجى على الحفلة امبارح؟	لماذا لا أذهب إلى الحفلة اليوم ؟
أريد لفتان من ISO مائة ، فيلم ملون ، ستة وثلاثين لقطة ، من فضلك .	بدي لفتين أيزو مية، فلم ملون، ستة وثلاثين لقطة ، لو سمحت.	أريد لفتين أيزو مائة ، فيلم ملون ، ستة وثلاثين لقطة ، من فضلك.
هل لديك مرآة ؟	عندك مراية؟	هل لديك مرطبة ؟
هل من المقبول عدم اتباع أي شخص لتعليمات الأمن ؟	بصير حدا ما يتبع تعليمات الأمن؟	هل يمكن أن يتبع أحد تعليمات الأمن ؟
علىّ أن ألحق بطائرة العاشرة صباحاً .	لازم ألحق طيارة الساعة عشرة الصبح.	يجب أن ألحق بطائرة في العاشرة صباحا.
من اين يمكنني الحصول على مسكوكة لركوب المترو ؟	من وين ممكن أجيب تذكرة لأركب المترو؟	من أين يمكنني الحصول على تذكرة لركب المترو ؟
أين يمكنني تغير نقودي ؟	وين بقدر أصرف مصاريي؟	أين يمكنني صرف نقودي ؟
هل بها جهاز تدفئة ؟	بيها جهاز تدفئة؟	هل بها جهاز تدفئة ؟
أريد بعض الكريم الليلي .	بدي كريم ليلي.	أريد كريم ليلي.
كم تتقاضى ثمنا لإرسالها لليابان ؟	قديش بدك توخذ عشان تبعثها على اليابان؟	كم ستأخذ لإرسالها إلى اليابان ؟
أكيدا التي تتحدث معك ، أنا عندي حجز مائدة في تمام الساعة السادسة والثلث هذا المساء . ولكني آسفة لأني سأصل متأخرة نصف ساعة .	أكيدا يلي بتحكي. عندي حجز طاولة عالساعة ستة و ثلث المسا. بس آسفة لإني رح أوصل متأخرة نص ساعة.	بالتأكيد. أنت تقول. لدي حجز مائدة في الساعة السادسة والنصف مساءاً. لكن آسف لأني سأصل متأخر ثلاثين دقيقة.
متي سنستقل القارب ؟	متى بدنا نركب القارب؟	متى سنركب القارب ؟
أرغب في غرفة بحمام .	بدي غرفة بحمام.	أريد غرفة بحمام.
معذرة , متي ينتهي هذا الفيلم ؟	عفواً, متى بخلص هذ الفلم؟	معذرة ، متى ينتهي هذا الفيلم ؟
لقد تمكنت من تحقيق ذلك .	قدرت أوصل لهذا الشي.	هل يمكنني الوصول إلى هذا الشيء ؟
هل هو طريق طويل ؟	هو الطريق طويل؟	هل هو الطريق طويل ؟
ما هي الأنواع التي لديكم ؟	شو الأنواع اللي عندكم؟	ما الأنواع التي لديكم ؟
سأرتبك . هل تمانع في رسم خريطة لي ؟	رح أرتبك. ما عندك مشكلة ترسملي خريطة؟	سأرتبك. هل لديك مشكلة في رسم خريطة لي ؟
لدينا جمبري رائع جداً اليوم .	عنا جمبري مميز كثير اليوم.	لدينا جمبري مميز جداً هذا اليوم.
هل لديك أيّ خرائط بسيطة للمدينة ؟	عندي أي خرايط بسيطة للمدينة؟	هل لدي أية خرائط بسيطة للمدينة ؟
معذرة أريد الذهاب إلى فندقي في المدينة بالحافلة . أين يمكن أن أستقل حافلة ؟	عفواً، أنا بدي أروح على الفندق موجود بالمدينة بالباص. من وين بقدر آخذ باص؟	معذرة ، أنا أريد الذهاب إلى الفندق موجود في المدينة بالحافلة. أين يمكنني الحصول على حافلة ؟
شكراً . لكنني لا أعتقد أن عندي وقت للإقامة لمدة ليلتين . هل يمكنك حجز غرفة بسريرين لي في ذلك الفندق ليلة الثاني عشر من مارس فقط ؟	شكراً ، بس ما بتوقع أنه معي وقت عشان أظل ليلتين. ممكن تحجزلي غرفة مزدوجة في الفندق لليلة اثنعش ثلاث بس؟	شكراً ، لكن لا أعتقد أن لدي وقت كاف للبقاء ليلتين. هل يمكنك أن تحجز لي غرفة مزدوجة في الفندق لليلة أثنين ثلاثة فقط ؟
بالتأكيد . كيف يمكننا خدمتك ؟	أكيد. كيف منقدر نخدمك؟	بالتأكيد. كيف يمكننا خدمتك ؟
شيكات سياحية . شكراً . خذ تذكرتك وبطاقة المرور للصعود على متن الطائرة . كن هناك قبل وقت الرحلة بساعة من فضلك .	شيكات سياحية. شكراً. أخذ تذكرتك و الفيزا عشان تطلع على الطيارة. كون هناك قبل الرحلة بساعة لو سمحت.	شيكات سياحية. من فضلك احصل على تذكرتك و الفيزا للسفر على متن الطائرة.
أوافق . يجب أن تصبح طبيعية جداً .	أنا موافق. لازم تصير طبيعة كثير.	أنا موافق. يجب أن تكون طبيعة جداً.
أهذه عيادة إف ؟	هاي عيادة إف؟	هل هذه عيادة إف ؟
هل لك أن تغيرهم إلى دولارات من فضلك ؟	ممكن تحولي اياهم لدولارات، لو سمحت؟	هل يمكنك تحويلهم إلى دولارات ، من فضلك ؟
حسناً . أراك الساعة الثانية يوم الأحد .	تمام . بشوفك الساعة ثنتين يوم الأحد.	حسنا. سأراك في الساعة الثانية يوم الأحد.
هل يمكنك أن تشذب شاربي ؟	ممكن لو سمحت ترتبلي شواربي؟	هل يمكنك من فضلك أن ترتب لي أمتعتي ؟
أود أن أصرف هذا الشيك بسبعين دولاراً .	بدي أصرف هاذ الشيك بقيمة سبعين دولر.	أريد صرف هذا الشيك بقيمة سبعين دولاراً.
الجزء المكتوب بالطريقة المائلة يشير إلى التغييرات التي حدثت في التسعينات .	الجزء اللي مكتوب بالطريقة المايلة بدل على التغييرات اللي صارت بالتسعينات.	الجزء المكتوب بالطريقة المائلة بدلاً من التغييرات التي حدثت في الثمانينيات.
هل تشمل هذه الرحلة زيارة لبرج سيرز ؟	بتشمل هاي الرحلة زيارة لبرج سيرز؟	هل تشمل هذه الرحلة زيارة إلى برج سيرز ؟
أين ستنتهي الجولة ، ومتى ؟	وين راح تخلص الرحلة، و أميت؟	أين ستغادر الرحلة ، متى ؟
تفضل هذان دولاران . احتفظ بالباقي .	تفظل هي دولرين. خلي الباقي إلك.	إنها دولاران. احتفظ بالجزء لك.
هل يوجد أي محل متعدد الأقسام قريب من هنا ؟	في أي مول قريب من هون؟	هل يوجد أي مول قريب من هنا ؟
هل ستزال تعمل جدول المواعيد ؟	هل رح تظل جدول المواعيد شغّالة؟	هل ستظل جداول المواعيد مفتوحة ؟
سوف آخذ هذه ، من فضلك .	راح آخذ هاظ ، لو سمحت.	سأأخذ هذا ، من فضلك.
يقولون أن اليابان دولة غنية جداً .	بقولوا أنه اليابان بلد غني.	يقولون أن اليابان بلد غني.
ملعقتين , من فضلك .	معلقتين , لو سمحت.	معلقتين ، من فضلك.
أجل ، واحدة فقط . متى سأعرف ؟ وكيف سيتم تعويضي ؟	أها، بس وحدة؟ متى رح أعرف؟ وكيف رح يكون التعويض؟	نعم ، ولكن واحدة ؟ متى سأعرف ؟ وكيف سيكون التعويض ؟
هناك ، أمام بيانات السائح تماما .	هناك ، قدام بيانات السايح بالزبط .	هناك ، أمام بيانات السائر بالضبط.
أين أجد الاسطوانات المدمجة ؟	وين بلاقي السيديات؟	أين أجد السيديات ؟
أنا متأثر للغاية , لا أستطيع البقاء ساكنا .	أنا متأثر كتير, ما قادر أضل ساكت.	أنا متأثر جداً, لا أستطيع أن أبقى صامتاً.
هل هو قريب لنصل إليه سيراً .	هو قريب عشان نوصلو مشي؟	هل هو قريب لكي نصل مشياً ؟
إني من إسبانيا .	أنا من إسبانيا.	أنا من إسبانيا.
ـ أين أقرب محل جزارة ؟	وين أقرب لحام؟	أين أقرب لحام ؟
أود تأجير هذا الطراز من السيارات لمدة أربعة وعشرين ساعة .	بدي أستأجر هاذ الموديل من السيارات لمدة أربع وعشرين ساعة.	أريد استئجار هذا الطراز من السيارات لمدة أربعة وعشرين ساعة.
لا يمكن أن أبيع هذه دون روشتة .	ما بقدر أبيع هاي بدون وصفة طبية.	لا أستطيع بيع هذه بدون وصفة طبية.
هل لديك صحف يابانية ؟	عندك جرايد يابانية؟	هل لديك صحف يابانية ؟
هل هذا الحذاء متين ؟	هاذ البوط قوي؟	هل هذا البوط قوي ؟
لكنّي لدى موعد لرؤيتها في السّاعة الثّانية .	بس أنا عندي موعد عشان أشوفها الساعة ثنتين.	لكني لدي موعد لرؤية هذه الساعة الثانية.
هل لديك غرف أكبر ؟	عندك غرف أكبر؟	هل لديك غرف أكبر ؟
اعطني عامل التليفون من فضلك .	إعطيني عامل التلفون لو سمحت .	أعطني عامل التليفون من فضلك.
ظننت أنكم أيها الشباب تأكلون الكعك المخبوز فقط .	فكرت إنكو يا شباب بتوكلوا الكعك المخبوز بس.	لقد فكرت أنكم يا شباب تأكلون الكعك المخفوق فقط.
أريد استئجار كرسي مركب .	بدي أستأجر كرسي اتمدد عليه.	أريد استئجار مقعد للنوم عليه.
أنا أبحث عن شيء أنيق .	أني بدور على اشي لايق.	أنا أبحث عن شيء لايقاظ.
حسناً . هل يجب أن أقوم بتركيزها ؟	ماشي. لازم أساويها مركزة؟	حسناً. هل يجب أن أجعلها مركزة ؟
قهوة مع القشدة والسكر ، من فضلك .	قهوة مع القشطة والسكر، لو سمحت.	قهوة مع القشطة والسكر ، من فضلك.
سوف ننتظر . من فضلك اتصل بنا عندما تكون مستعداً .	رح نستنى . لو سمحت, إتصل فينا لما تكون جاهز.	سننتظر. من فضلك اتصل بنا عندما تكون جاهزاً.
فقط سياحة .	بس للسياحة.	فقط للسياحة.
أحتاج إلى طيب .	بدي دكتور.	أريد طبيباً.
إن الجونلات القصيرة ومعها الأحذية الطويلة لن تنقضي موضتها .	مش ممكن تخلص موضة التنانير القصيرة مع الجزم الطويلة.	لا يمكنك أن تتخلص من موضة التنانير القصيرة مع الجزم الطويلة.
ألا ترغب في فنجان شاي ؟	ما بدك تشرب كاسة شاي؟	هل تريد تناول كوب من الشاي ؟
ليس تماماً . فقط شيء ما غير غالي الثمن .	مش هيك. بس إشي مش غالي.	ليس هذا. لكن شيئاً ليس غالياً.
إذا كنت تودّ ، بإمكاننا الاستراحة هنا .	إذا إنت حاب، ممكن نستريح هون.	إذا كنت ترغب ، يمكننا أن نستريح هنا.
هل هذه كلها هي حقائبك ؟	هاي كلها شناتيك؟	هل هذه كلها حقائبك ؟
هل تريد بالحلويات ؟	بدك حلويات؟	هل تريد بعض الحلوى ؟
نعم ، لكن ليس قويا جدا .	اه ، بس مش قوي كثير.	نعم ، لكني لست قوياً جداً.
ويسكي وماء ، من فضلك . هل لديكم وجبة خفيفة معه ؟	ويسكي ومي، لو سمحت. عندكم سندويشة صغيرة او شيء خفيف معه؟	ويسكي وماء ، من فضلك. هل لديكم سندويش صغير أو شيء خفيف معه ؟
أتعرف كاثي ؟ إنه عيد ميلادها .	بتعرف كاثي؟ هاي حفلة عيد ميلادها.	هل تعرف كاثي ؟ إنها حفلة عيد ميلادها.
أود تحميض هذا الفيلم . متي سيكون جاهزا ؟	بدي أحمض هالفلم. متى رح يكون جاهز؟	أريد حمض هذا الفيلم. متى سيكون جاهزاً ؟
تشغل أشخاصاً جدد في أبريل .	رح توظف ناس جداد في نيسان.	سوف توظف أشخاصاً آخرين في نيسان.
سأكون سعيدا بذلك . متى ترغب في ذلك ؟	رح اكون مبسوط لهالشي. متى بدك ياه؟	سأكون سعيداً لهذا الشيء. متى تريده ؟
رائع .	بجنن.	إنه رائع.
من فضلك اتجه يساراً عند التقاطع التالي .	لو سمحت روح عاليسار بالتقاطع الجاي.	من فضلك اتجه إلى اليسار في التقاطع القادم.
هلا أريتني بعض الفساتين ؟	ممكن توريني شوي من الفساطين؟	هل لك أن تريني بعض الفساتين ؟
أين المقهى ؟	وين الكوفي شوب ؟	أين الكوفي شوب ؟
لا يمكنك جلب الألعاب النارية إلى كندا .	ما بتقدر تجيب ألعاب نارية على كندا.	لا يمكنك أن تحضر ألعاب نارية إلى كندا.
اعتقد أن هذا عالي قليلا بالنسبة لي .	بتوقع أنه شوي عالي بالنسبة الي.	أعتقد أنه سيكون مرتفعاً جداً بالنسبة لي.
لم يعد بإمكانك حقيقةً أن تقوم بعمل تصميم دون كمبيوتر بعد الآن .	بطلت تقدر تعمل تصميم بدون كمبيوتر من هون و طالع.	لقد فقدت القدرة على إجراء تصميم بدون كمبيوتر من هنا وصاعداً.
أريد اسطوانة مدمجة .	بدي سي دي.	أريد سي دي.
هل يمكنني حجز غرفة بسريرين تطل على المحيط ؟	بصير أحجز غرفة بتختين بطل على البحر؟	هل يمكن أن أحجز غرفة بغرفتين تطلان على البحر ؟
مايومي , هل تسمح أن تملأ هذه الورقة بتوقيعك ؟	مايومي، ممكن تعبيي هاي الورقة بتوقيعك؟	مايومي ، هل يمكنك أن تملأ هذه الورقة بتوقيعك ؟
هلا أرشدتني إلى مطعم مفضل بين الشبان ؟	ممكن ادلني على مطعم معروف بين الشباب؟	هل يمكن أن أدلني على مطعم مشهور بين الشباب ؟
حجزنا مقعداً ليوم الخامس والعشرين من أكتوبر في الساعة الحادية عشر صباحاً .	حجزنا مقعد لخمسة و عشرين من شهر عشرة الساعة احدعش الصبح.	لقد حجزنا مقعداً لخمسة عشر من أكتوبر الساعة التاسعة صباحاً.
إن الناس ودودون جداً .	الناس حابيين كثير.	الناس يحبون كثيراً.
متى يتعين علي أن أكون في المحطة ؟	أي وقت لازم أكون بالمحطة؟	في أي وقت يجب أن أكون في المحطة ؟
ليس هذا صحيحاً . أنت دائما تعاملني .	هاظ مش صحيح . إنت دايما بتعاملني.	هذا ليس صحيحا. أنت دائما تتصرف كصديق.
ما نوع العصير الذي تفضله ؟	شو نوع العصير اللي بتحبه ؟	ما نوع العصير الذي تحب ؟
هل لي في بعض الفلفل ؟	ممكن أخذ شوي فلفل؟	هل يمكن أن آخذ بعض الفلفل ؟
احتاج إلى بعض الهدايا التذكارية من نيويورك .	أنا بدي شوية هدايا تذكارية من نيويورك.	أنا أريد بعض الهدايا التذكارية من نيويورك.
اسمي " تارو تاناكا " لدي حجز مسبق .	اسمي " تارو تاناكا " عندي حجز من قبل.	اسمي " تارو تاناكا " لدي حجز منذ فترة طويلة.
إنها الثالثة والربع .	الساعة ثلاثة وربع.	الساعة الثالثة والنصف.
كم التكلفة كلها ؟	قديش الكلفة كلها؟	كم التكلفة كلها ؟
لا أدري كم من النقود يجب علىّ تركه كبقشيش ؟	ما بعرف قديش لازم أترك بغشيش.	لا أعرف كم يجب أن أترك بقشيشاً.
سآخذ شيكولاتة ساخنة .	بدي آخذ هوت شوكليت.	أريد أن آخذ هوت شوكليت.
ماذا تنوي أن تفعل عقب الانتهاء من المدرسة . ؟	شو بتخطط تعمل بعد ما تخلص مدرسة؟	ماذا تخطط بعد أن تنتهي من المدرسة ؟
أشعر بالغثيان .	بحس حالي بدي أتقيء.	أشعر بالحمى.
ماذا ؟ هل عليك دفع ضرائب عندما يكون لديك أكثر من ثلاثة زجاجات كحول ؟	شو؟ عليك ضرايب بس يكون عندك أكثر من ثلاث قناني كحول؟	ماذا ؟ هل لديك ضرائب فقط لا تزيد على ثلاثة قناني من الكحول ؟
لقد حصلت على بطارية فارغة .	بطاريتي صارت فاضية.	بطاريتي جاهزة.
معذرة . أنا طالب جامعي من اليابان . هل أنتم طلاب في جامعة نيويورك ؟	معلش، أنا طالب جامعي من اليابان. إنتوا طلاب بجامعة نيو يورك؟	معذرة ، أنا طالب جامعي من اليابان. هل أنتم طلاب في جامعة نيو يورك ؟
من الذي يعزف ؟	مين اللي عم يعزف؟	من الذي يعزف ؟
معطف رائع . هل هو صناعة بريطانية ؟	جاكيت حلو. هاد صنع بريطاني؟	جاكيت جميل. هل هذا صنع بريطاني ؟
هل لديكم فيلم شفاف ملون ؟	عندك فلم شفاف ملون؟	هل لديك فيلم شفاف ملون ؟
أين قسم السيدات ؟	وين قسم النسوان؟	أين قسم النساء ؟
جميل الفستان التي ترتدينه .	حلو الفسطان اللي لابسيته.	جميل الفستان الذي ارتديته.
تموج شعر دائم مشدود من فضلك .	كيرلي عطول مشدود، لو سمحت.	أرني أطول مشدود ، من فضلك.
هل لدينا وقت كاف لإنهاء إجراءات المغادرة ؟	معنا وقت كافي لنخلص إجراءات المغادرة؟	هل لدينا وقت كاف لإنهاء إجراءات المغادرة ؟
هل هناك جولة بالحافلة تجوب المدينة ؟	في دورة بالباص نلف بالبلد؟	هل هناك دورة في الحافلة نجوب البلدة ؟
هل أستطيع الحصول على تذكرة متعددة الاستخدام ؟	ممكن أوخذ بطاقة ذكية؟	هل يمكن أن أحصل على بطاقة ذكية ؟
كان فيلم " حرب الكواكب " أكثر الأعمال شعبية عام ألف وتسعمائة وأربعة وثمانون .	كان فيلم "حرب الكواكب" من أشهر الأفلام سنة ألف وتسعمائة وأربعة وثمانون.	كان فيلم " حرب الكواكب " من أشهر الأفلام في ألف وتسعمائة وثمانون.
أوه ، يجب أن تخطر القنصلية على الفور .	أوه، لازم تبلغ القنصلية هسا.	أوه ، عليك أن تبلغ القنصلية الآن.
هل يوجد ملهى ليلي جيد به عرض رقصة الفلامنكو ؟	في نايت كلوب رايق عنده رقصة الفلامنكو؟	هل يوجد نايت كلوب مفضل لرقصة الفلامنكو ؟
لماذا لم تقلع الرحلة ؟ أخبرني عما يجري .	ليش ما طلعت الرحلة؟ قلي شو بصير.	لماذا لم تبدأ الرحلة ؟ أخبرني ماذا سيحدث.
سأصبح بديناً في حال ما ظللت جالساً هنا آكل باستمرار .	رح أصير ناصح لو استمريت قاعد هون آكل دايما.	سأكون على صواب لو استمررت في تناول الطعام دائماً.
هل على السيدات ارتداء فستان سهرة ؟	لازم الستات يلبسن فسطان سهرة؟	هل يجب على السيدات ارتداء فساتين سهرة ؟
حسنا إذاً ، أريد عصا مضرب أصغر كتلك التي مع جوليا روبرتس .	ماشي يعني، بدي عصاة مضرب اصغر مثل اللي مع جوليا روبرتس.	حسناً ، أريد عصا مضرب أصغر مثل التي مع جوليا روبرتس.
أريد أن اتصل هاتفياً بالسفارة اليابانية .	بدي أحكي بالتلفون مع السفارة اليابانية.	أريد الاتصال هاتفياً بالسفارة اليابانية.
هل هذه السجائر معتدلة ؟	هاي السقاير معتدلة؟	هل هذه السقايات معتدلة ؟
هل هذا طلب شخص آخر .	هاظا طلب واحد ثاني؟	هل هذا طلب آخر ؟
في حالة إمكان ذلك , احجز منضدة بالقرب من النافذة من فضلك .	لو في امكانية, احجزلي طاولة عند الشباك لو سمحت.	من فضلك احجز لي مائدة عند النافذة من فضلك.
هل يمكن أن نحجز طاولة لخمسة أشخاص ؟	ممكن نحجز طاولة لخمس أشخاص؟	هل يمكن أن نحجز مائدة لخمسة أفراد ؟
شركة الخطوط الجوية اليابانية ، طائرة رقم واحد اثنان ثلاثة .	شركة الخطوط الجوية اليابانية، رحلة الطيران رقم واحد اثنين ثلاثة.	شركة الخطوط الجوية اليابانية ، رحلة الطيران رقم واحد اثنان ثلاثة.
من فضلك اتصل بي في الفندق عندما تجد حقائبي .	من فضلك، كلمني بالفندق لما تلاقي شنطي.	من فضلك ، اتصل بي في الفندق عندما تجد حقائبي.
ذلك الحد الأدنى للسعر .	هيك أقل سعر.	إنها أقل سعراً.
أنت محظوظ .	إنت محظوظ.	أنت محظوظ.
هل سيكون هذا المتجر مفتوحاً غداً ؟	راح يكون هاظ المحل فاتح بكرا؟	هل سيكون هذا المحل مفتوحاً غداً ؟
وصلت الفاتورة لمائة دولار .	وصلت الفاتورة لمية دولار.	وصلت الفاتورة إلى مائة دولار.
هل هذا مكتب الاستقبال ؟ هل يوجد عيادة قريبة ؟	هاظ مكتب الاستقبال؟ في عيادة قريبة من هون؟	هل هذا مكتب الاستقبال ؟ هل توجد عيادة قريبة من هنا ؟
كم عمر ابنتك ؟	قديش عمر بنتك؟	كم عمر ابنتك ؟
لن ينضم للجولة الاختيارية إلا القليل من الناس .	ما رح ينضم للجولة الاختيارية غير شوي من الناس.	لن ينضم إلى الجولة الاختيارية سوى القليل من الناس.
إنها مجرد هدية تعبيرا عن تقديري .	هاي مجرد هدية تعبير عن تقديري.	إنها مجرد هدية للتعبير عن تقديري.
تحتاج لرؤية أخصائي .	بتحتاج تشوف دكتور متخصص.	تحتاج إلى طبيب متخصص.
كم تكلّف هي لكل جالون ؟	كم سعر الغلون الواحد؟	ما سعر الغلون الواحد ؟
أيمكنني الحصول على جدول زمني ، من فضلك ؟	ممكن أحصل على جدول الوقت، لو سمحت؟	هل يمكن أن أحصل على جدول الوقت ، من فضلك ؟
لقد سُرقت حقيبتي .	انسرقت شنتتي.	لقد سُرقت حقيبتي.
نستخدم الأعواد عندما نأكل .	بنستعمل العيدان لما بنوكل.	نستخدم العيدان عندما نتناول الطعام.
حسناً ، في حالة إصرار كليكما , سأذهب معكما .	طيب، اذا انتو الاثنين مصرين، أني راح اروح معكو.	حسنا ، إذا كنتم تريدون ، فإنني سأذهب معكم.
في أي محطة سأنزل للذهاب إلى مبنى إمباير ستيت ؟	بأي موقف لازم انزل عشان أروح على عمارة امباير ستيت؟	في أي موقف يجب علىّ النزول لكي أذهب إلى عمارة إمباير ستيت ؟
لابد أن تأخذها تسعة وتسعون مرة في اليوم ، قبل الوجبات .	لازم تاخذها تسعة وتسعين مرة باليوم، قبل الأكل.	عليك أن تأخذها تسعة وتسعين مرة في اليوم ، قبل الطعام.
لا يا سيدي . هذه الظهيرة محجوزة بالكامل . ومع ذلك يمكن أن تحجز غدا .	لا، يا أستاذ، اليوم بعد الظهر كله محجوز. لكن بتقدر تحجز بكرا .	لا ، يا سيدي ، اليوم بعد الظهر محجوز. لكن يمكنك الحجز غداً.
هل هناك طبيب للفندق أو واحد على صلة بالفندق .	في دكتور للفندق أو واحد ع علاقة بالفندق؟	هل يوجد طبيب للفندق أو شخص له علاقة بالفندق ؟
المياه الساخنة ليست ساخنة بالقدر الكافي .	المية الحامية مش حامية بشكل كافي.	المياه الساخنة لا تزال ساخنة بشكل كافي.
هل استرحت في نومك ؟	ارتحت بالنومة؟	هل استمتعت بالنوم ؟
أريد إعادة المال . هل يمكن أن أحصل على مالي ؟	بدي أرجع المصاري. بقدر أوخذ مصرياتي؟	أريد إعادة النقود. هل يمكنني أخذ نقودي ؟
انها باتجاه الجنوب .	هي باتجاه الجنوب.	إنها باتجاه الجنوب.
ما سعر تذكرة درجة أولى إلى إدنبره , من فضلك ؟	كم سعر تذكرة درجة أولى لإدنبره , إذا تكرمت.	ما هو سعر تذكرة درجة أولى إلى إدنبره ، من فضلك ؟
عندي قشعريرة .	عندي قشعيرية.	عندي قشدة.
لماذا , شكرا جزيلا . هل أستطيع الارتقاء للقمة ؟	ليش، شكراً كثير الك. بقدر اطلع للقمة؟	لماذا ، شكراً جزيلاً لك. هل يمكنني الوصول للقمة ؟
لا . هل تحب الإبلاغ عنه ؟	لا . بدك تبلغ عنو ؟	لا. هل تريد أن تبلغ عن ذلك ؟
من فضلك غير هذه الينات إلى جنيهات .	لو سمحت اصرفلي هظول من ين لقنيه.	من فضلك اصرف هذا من فضلك.
سآخذ مقاعد درجة رجال أعمال ، أليس كذلك ؟	راح آخد مقاعد درجة رجال الأعمال، صح؟	سأحصل على مقاعد درجة رجال الأعمال ، أليس كذلك ؟
لا أستطيع أن أفعل ذلك , لكني سوف أضعها في الحقيبة لك .	ما بقدر اعمل هيك , بس رح احطها بالشنتة الك .	لا أستطيع فعل ذلك ، لكن سأضعها في حقيبتي.
إنه غالي الثمن إلى حد ما . ألا يمكنك منحي خصماً ؟	هاد كثير غالي. ما فيك تعطيني شوية خصم؟	هذا غالي جداً. هل لك أن تعطيني بعض الخصم ؟
إن " السنة " متقلقلة .	ال"سنة" عم تتقلب.	إن السنة تتقلب.
سيكون جاهزا بعد غد في المساء .	راح يكون جاهز بعد بكرا المسا.	سيكون جاهزاً بعد غد صباحاً.
هل ليدكم صناديق لإرسال الطرود ؟	عندكم علب لارسال الطرود ؟	هل لديكم علب لإرسال الطرود ؟
إن عثرت على شيء ، اتصل بي من فضلك .	لو لقيت إشي، رنلي إذا تكرمت.	لو وجدت شيئاً ، اتصل بي من فضلك.
أود تقصيره ببوصة واحدة من هذه المنطقة .	بدي اقصّره بوسطة وحدة من هادي المنطقة.	أريد أن أقصه بعربة واحدة من هادي المنطقة.
هل لديكم أي خبز ؟	عندكم خبز؟	هل لديكم خبز ؟
أود بعض البيجامات .	بدي بيجامات.	أريد سترات.
أين يمكنني طباعة الفيلم ؟	وين بقدر أطبع الفلم؟	أين يمكنني أن أطبع الفيلم ؟
أيمكنك الحضور إلى هنا لإصلاحه ؟	ممكن تيجي هون عشان اتصلحه؟	هل يمكنك أن تأتي هنا لتتصل به ؟
أين يمكنني أن أستقل حافلة لمشاهدة المعالم ؟	من وين ممكن اركب باص لحتى اتفرج ع المعالم؟	من أين يمكنني ركوب حافلة لمشاهدة المعالم ؟
مرحبا يا سيدة ياماجوتشي ؟ فريقك على الخط . قبلت دعوتك . استمر من فضلك .	أهلا وسهلا يا سيدة ياماجوتشي، فريقك عم يكلمك. رديت على دعوتك. استمري، من فضلك.	مرحباً يا سيدتي يا ياماجوتشي ، فريقك يتصل بك. استمري ، من فضلك.
هل لك أن تساعدني في الوصول إلى حقيبتي ؟	ممكن تساعدني ألاقي شنتيتي؟	هل لك أن تساعدني في العثور على حقيبتي ؟
آسف لقد نفذ هذا الصنف لدينا .	معذرة، هاد النوع خلص عنا.	معذرة ، هذا النوع قد انتهى لدينا.
ما اسم الشخص الذي تود التحدث إليه ؟	شو اسم الشخص اللي بدك تحكي معه؟	ما اسم الشخص الذي تريد التحدث معه ؟
لقد اجتزت هذا الاختبار بنجاح كبير .	عديت الامتحان بنجاح كبير .	لقد اجتازت الامتحان بنجاح كبير.
طبقاً لتقرير الطقس ، فإن غداً سيشهد سقوط جليد .	بناءً على النشرة الجوية، راح تثلج بكرا.	بناءً على النشرة الجوية ، سوف تتساقط الثلوج غداً.
لا أستطيع ضبط اللوحة .	مش قادر أزبط الصورة.	لا أستطيع أن ألتقط صورة.
لا زالت غالية جدا . هل من الممكن أن آخذها بثلاثة دولارات ؟	بعدها غالية كثير. ممكن أشتريها بـثلث دولارات؟	إنها غالية جداً. هل يمكن أن أشتريها بثلاثة دولارات ؟
نريد اثنين هامبورجر واثنين قهوة ، من فضلك ، نريد تناولها خارج المحل .	بدنا زوج همبرجر وزوج قهوة، لو سمحت، بدنا ناكلها برة المحل.	نريد زوج من الهمبرجر وزوج من القهوة ، من فضلك ، نريد تناولها خارج المحل.
زدني قليلاً .	زيدني شوي.	أعطني بعض الوقت.
هل لي بشوكة أخرى ؟	بدي شوكة ثانية؟	أريد شوكة أخرى ؟
أنا هنا في مهمة إعلامية .	أنا هون بشغل إعلامي.	أنا هنا أعمل في مجال الإعلام.
إنها ليست أحدث طراز ، أليس كذلك ؟	هاي مش أحدث موديل ، صح؟	هذه ليست أحدث موديل ، أليس كذلك ؟
أبغي بعض الأقراص المنومة .	بدي حبوب منوم.	أريد حبوب منوم.
أي حافلة تذهب إلى وسط المدينة ؟	أي باص رايح عالدوار الرئيسي؟	أي حافلة تتجه إلى الدوار الرئيسي ؟
أريد الذهاب إلى مركز هارفارد . هل يمكن أن تخبرني عندما نصل إلى هناك ؟	بدي اروح على مركز هارفارد. ممكن تقلي لما نوصل هناك؟	أريد الذهاب إلى مركز هارفارد. هل يمكنك أن تخبرني عندما نصل هناك ؟
أريد أن أحجز على شركة نورث وست إيرلينز على الرحلة رقم صفر ثمانية ستة في الخامس .	بدي احجز على شركة نورث وست إيرلينز على الرحلة رقم صفر ثمانية ستة بخمسة الشهر.	أريد أن أحجز على شركة نورث وست إيرلينز على الرحلة رقم صفر سبعة ستة في السادس من مايو.
لقد استمتعت بالوجبة كثيراً جداً .	كثير استمتعت بالوجبة.	استمتعت بالوجبة.
سيكون هناك تأخير بسيط .	راح يكون في تأخير بسيط.	سيكون هناك تأخير بسيط.
فقط إذا كانت ملكك ، سيدي . هاها ، مزحة صغيرة .	بس اذا كانت ملكك ، يا سيدي . ههههههه، هاي مزحة صغيرة.	فقط إذا كانت ملكك ، يا سيدي. هاهي ، يا سيدي. هاهي ، إنها مزحة صغيرة.
نستطيع أن نرتب لتنظيف غرفاتكم .	ممكن نرتب معك عشان تنظيف غرفكم.	هل يمكن أن نرتب معك لتنظيف غرفكم ؟
وما هي المثانة ؟	وشو هي المثانة ؟	ما هي المثانة ؟
لا أستطيع النوم جيداً أثناء الليل .	ما قدرت أنام مليح بالليل.	لا أستطيع النوم جيداً الليلة.
ما هو مستوى مهارتك في عزف الكمان ؟	شو مستواك بعزف الكمان؟	ما هو مستواك في العزف على الكمان ؟
ما هي أكثر الأشياء التي تثير اهتمامك الآن ؟	شو أكثر الأشياء اللي بتلفت انتباهك هسا ؟	ما أكثر الأشياء التي تثير انتباهك الآن ؟
اجعل قصة الشعر تتدلى لأسفل , من فضلك .	خلي قصة الشعر تنزل لتحت، لو سمحت.	دع قصة الشعر تنزل إلى الأسفل ، من فضلك.
هل لك أن تستدعي لي سيارة أجرة الساعة الثامنة صباح غد ؟	ممكن تجيبلي تكسي بكرا الساعة ثمنية الصبح؟	هل يمكنك أن تحضر لي سيارة أجرة غداً الساعة السابعة صباحاً ؟
هلا ملأت هذا النموذج ؟	ممكن تعبي هاذ النموذج؟	هل يمكن أن تملأ هذا النموذج ؟
أيمكنك الانتهاء من ذلك بعد عشر دقائق ؟	بتقدر تخلص هاي بعد عشر دقايق؟	هل يمكنك أن تتخلص من هذه بعد عشر دقائق ؟
الملح من فضلك .	الملح لو سمحت.	الملح من فضلك.
لقد نمت و لم أتيقظ حين رن منبه السادسة و النصف .	نمت و ما صحيت ع منبه الساعة ستة ونص.	نامت ولم استيقظت إلا في السابعة والنصف.
نحن من أكبر موردي أجهزة الميكروكومبيوتر .	إحنا من أكبر موردين لأجهزة الميكرو كمبيوتر .	نحن من أكبر موردي أجهزة الميكرو كمبيوتر.
من فضلك أخبرني كيف أملأ بطاقة النزول إلى البر ؟	لو سمحت قلي كيف أعبي بطاقة النزول للبر؟	من فضلك أخبرني كيف أحصل على بطاقة النزول إلى البر ؟
دجاج محمر ، من فضلك .	دجاج مشوي، لو سمحت.	دجاج مشوي ، من فضلك.
أجل ، ولكن هذا كثير جدا ، ولقد شبعت بالفعل .	أيوة، بس هاي كتير كثير ، وأنا صرت أكلت كفاية.	نعم ، ولكن هذا كثير جداً ، وأنا قد أكلت جيداً.
لقد أُغلق علي الباب . هل يمكن أن تفتح بابي , من فضلك ؟	ييي تسكر علي الباب . بتقدر تفتحلي الباب، لو سمحت؟	ييي تغلق الباب. هل يمكن أن تفتح لي الباب ، من فضلك ؟
بكل تأكيد . سنكون سعداء لفعل هذا .	أكيد. راح نكون مبسوطين نعمل هيك.	بالتأكيد. سنكون سعداء أن نفعل ذلك.
يقولون إن الأنفلونزا منتشرة هناك .	بيقولوا انو الإنفلونزا معمية هنيك.	يقولون أن الإنفلونزا معدية هنا.
هل ستدفع شركة الطيران رسوم الفندق والوجبات ؟	رح تدفع شركة الطيران رسوم الفندق والوجبات؟	هل ستدفع شركة الطيران رسوم الفندق والوجبات ؟
نسيت تذكرة الطيران الخاصة بي في الفندق .	نسيت تذكرة الطيارة قيتي بالفندق.	لقد نسيت تذكرة الطائرة التي تركتها في الفندق.
هل يمكن أن احصل على احدى المجلات أو شيئ من هذا القبيل ؟	ممكن أوخذ وحدة من المجلات أو شي زي هيك؟	هل يمكن أن آخذ واحدة من المجلات أو شيء من هذا القبيل ؟
تناسبني تماما .	مناسبيتني كثير.	إنها مناسبة جداً لي.
خذني إلى المستشفى .	خذني على المستشفى.	خذني إلى المستشفى.
ربما كان يعاني سّدَّة تنفسية .	ممكن عنده صعوبة بالتنفس.	هل يعاني من صعوبة في التنفس ؟
كم تكلفة الذهاب إلى فندق سي ؟	قديش بتكلف الروحة لفندق سي؟	كم تتكلف الذهاب إلى فندق سي ؟
هل هناك أي غرف خالية في عربة النوم ؟	ظل في أي غرف فاظية بعرباية النوم؟	هل توجد أية غرف متاحة في عربة النوم ؟
هل يوجد بوتيك قريب من هنا ؟	في بوتيك قريب من هون؟	هل يوجد متجر قريب من هنا ؟
عندما أرى الأسعار بهذا الرخص ، يبدو الأمر سخيفاً أن أشتري أي شيء في اليابان .	لما أشوف الأسعار بهالرخص ، بحس أنه مسخرة الواحد يشتري أي شي باليابان.	عندما أرى الأسعار في هذه المحلات ، أشعر أن المرء سيضطر إلى شراء أي شيء في اليابان.
لم يخرج من الماكينة شيء .	ما طلع من الماكينة إشي.	لم يخرج من الماكينة شيء.
كم كان ثمنها ؟	قديش كان حقها ؟	كم كان سعرها ؟
أريد هدية بمناسبة الذكرى السنوية .	بدي هدية لمناسبة الذكرى السنوية.	أريد هدية بمناسبة الذكرى السنوية.
علي أن ألحق طائرة متجهة للوس أنجليس باكر صباح غد .	لازم ألحق طيارة لوس أنجلوس بكرا الصبح بكير.	يجب أن ألحق بطائرة لوس أنجلوس غداً صباحاً مبكراً.
يا صاح , أتعرف أي مكان يستحق الرؤية قريبا من هنا ؟	أخوي، بتعرف أي مكان محرز الشوفة قريب من هون؟	أخي ، هل تعرف أي مكان لحجز الخبز بالقرب من هنا ؟
عندي الكثير من الوقت .	عندي وايد وقت.	لدي الكثير من الوقت.
من أين يمكنني شراء بعض الهدايا التذكارية ؟	منين بقدر أشتري شوية هدايا تذكارية ؟	من أين يمكنني شراء بعض الهدايا التذكارية ؟
أنظر إلى هذا . انظر إلى هذا . سوف تخبرني أن الاختلاف بين هذا الشاب وذلك الشاب هو الحظ ؟ محمد ، يقف بالسيارة في جانب الطريق ، وأنت ؟ لن تمانع في أن أنام معك هنا . أنا متأخر . كان لقاء جميل معك ؟	شوف هاظ. شوف هاظ. راح تحكيلي انو الفرق بين هالشب وهذاك الشب هو الحظ؟ محمد، واقف بالسيارة على زقاق الشارع، وإنت؟ ما راح تعترض اذا قعدت معك هون. انا تأخرت. كان لقاء حلو معك؟	انظر إلى هذا. محمد ، واقف بالسيارة في شارع الشارع ، وأنت ؟ محمد ، هل ستعترض إذا جلست معك هنا ؟ أنت ؟ أنت لم تحضر لي أي لقاء جيد معك. هل كان لقاءً رائعاً معك ؟ أنت ؟ أنت ؟ هل ستعترض إذا جلست معك هنا ؟ أنت ؟ أنت ؟ أنت ؟ أنت ؟ أنت ؟ أنت ؟ أنت ؟ أنت ؟ أنت ؟ أنت ؟ أنت ؟ أنت ؟ أنت ؟ أنت ؟ أنت ؟ أنت ؟ أنت ؟ أنت ؟ محمد ، محمد ، محمد ، أنت يا محمد ، أنت يا
أعمل في شركة تجارية .	أني بشتغل بشركة تجارية.	أنا أعمل بشركة تجارية.
أفهم ، لكن لا أستطيع أن أقولها .	فاهم، بس بقدر أقولها.	أفهم ، لكن يمكنني أن أقولها.
نصف زجاجة , من فضلك .	نص قنينة ، لو سمحت.	نصف زجاجة ، من فضلك.
متى تقام مباراة كرة القدم ؟	متى بتبلش مباراة كرة القدم؟	متى تبدأ مباراة كرة قدم ؟
ما هو متوسط أسعاركم للفاكس الدولي كل شهر ؟	كم معدل تكلفة الفاكس الدولي كل شهر؟	ما تكلفة الفاكس الدولي كل شهر ؟
انتظر دقيقة من فضلك .	استنى دقيقة لو سمحت.	انتظر دقيقة من فضلك.
هل هو محجوز بالكامل ؟	هو محجوز كله؟	هل هو محجوز كله ؟
شيء خطأ مع حقيبتك .	اشي غلط بشنتك .	هناك شيء خطأ في حقيبتك.
كلا منا يريد أن يحاسب على وجبته .	إحنا كل واحد بدو يدفع عن أكلته.	نحن ندفع عن أكله.
ألم تتلق الاستمارة بالطائرة ؟	ما أخذت الاستمارة بالطيارة؟	لم أحصل على الاستمارة بالطائرة ؟
هل لديك أي شيء لفترة أطول قليلاً ؟	عندك أي اشي لوقت أطول شوي؟	هل لديك أي شيء لفترة أطول قليلاً ؟
أجل ، من فضلك أرسله إلى الغرفة اثنا عشر أربعة وثلاثون .	أيوه، لو سمحت وديه على الغرفة اثنعش أربعة وثلاثين.	نعم ، من فضلك أرسله إلى الغرفة تسعة أربعة وثلاثين.
أين البحيرة ؟	وين البحيرة؟	أين البحيرة ؟
هل هناك حافلة تذهب مباشرة إلى هناك ؟	في أي باص بروح هناك مباشرة؟	هل هناك أي حافلة تذهب إلى هناك مباشرة ؟
أريد هذا الطراز لخمسة أماكن مرصعة .	بدي هاي النوعية لخمس أماكن مرصعة.	أريد هذه النوعية لخمس أماكن مرصعة.
هل لك أن تغلف هذه كالهدية ؟	ممكن تلفلي هاي كهدية؟	هل يمكنك أن تلف هذه كهدية ؟
نعم لدينا هذا ، سوف نجهزها لك .	اه موجود عنا. رح نجهزلك اياه.	نعم ، إنه لدينا. سنجهزه لك.
هل يمكنك تبديل هذه بواحدة جديدة ؟	ممكن تبدلي هاي بوحدة جديدة؟	هل يمكنك أن تغير هذه بأخرى جديدة ؟
عفواً . ستكون جاهزة في غضون خمس دقائق .	عفوا. رح تكون جاهزة خلال خمس دقايق.	معذرة. ستكون جاهزة خلال خمس دقائق.
أين يمكنني أن أشتري إبريقاً ؟	من وين بقدر اشتري بريق؟	من أين يمكنني شراء بريق ؟
أعتقد أن عمره أكثر من خمسين سنة .	بتوقع عمره اكثر من خمسين سنة.	أعتقد أنه أكثر من خمسين عاما.
أود أن أطلب , من فضلك .	بدي أطلب , بعد إذنك.	أريد أن أطلب, من فضلك.
معذرة . كيف يمكنني الوصول إلى المصرف ؟	معلش، كيف بقدر أوصل للبنك؟	معذرة ، كيف يمكنني الوصول إلى البنك ؟
لدي بعض الملابس للمغسلة .	عندي شوية وعية للغسيل.	لدي بعض العلكة للغسيل.
كريمة وسكر ؟	كريمة وسكر؟	هل كريمة وسكر ؟
هل يوجد أي قطار سريع إلى بوسطن ؟	في أي قطار سريع لبوسطن؟	هل يوجد أي قطار سريع إلى بوسطن ؟
الحجوزات في السابعة ، تحت اسم مانو .	حجوزات الساعة سبعة، بإسم مانو.	حجوزات الساعة السابعة ، باسم مانو.
أين أفضل مكان لمشاهدة المعالم ؟	وين أحسن مكان لشوفة المناظر؟	أين أفضل مكان لمشاهدة المناظر ؟
هل يمكنك أن تريني كيف أضع الغاز ؟	ممكن توريني كيف أحط الغاز؟	هل لك أن تريني كيفية وضع الغاز ؟
علىّ أن أذهب ، سأتصل بك لاحقاً .	أني لازم أروح. رح أحكي معك بعدين.	أنا مضطر للذهاب. سأتصل بك لاحقاً.
لا كهرباء .	ما في كهربا.	لا توجد كهرباء.
ثلاثون دولاراً وثمانون سنتا .	ثلاثين دولار وثمانين سنت.	ثلاثين دولاراً وثمانين سنتاً.
هل تعرف طبيب أسنان جيد ؟	بتعرف دكتور اسنان كويس؟	هل تعرف طبيب أسنان جيد ؟
هل من الممكن أن أمكث في غرفتي حتى الثانية مساءً ؟	ممكن أظل بغرفتي للساعة ثنتين المسا؟	هل يمكن أن أبقى في غرفتي حتى الساعة الثانية صباحاً ؟
إن حول غرفتي ضجيجا بالغا .	في ضجة كبيرة حوال غرفتي	هناك ضجة كبيرة حول غرفتي.
كم ستستغرق لكي تطلب ؟	قديش بدك يعني عشان تطلب؟	كم تريد أن تطلب ؟
معدتي تؤلمني بعد الوجبات .	معدتي بتالمني بعد الوجبات.	معدتي تؤلمني بعد الوجبات.
نفضل مائدة بجوار النافذة .	بنحب طاولة جنب الشباك.	نحب مائدة بجوار النافذة.
كنت على رحلة يونيتد إيرلاينز رقم ثمانية اثنان ثمانية .	كنت برحلة يونايتد إيرلاينز الرقم ثمانية اثنين ثمانية.	كنت في رحلة يونايتد إيرلاينز رقم ثمانية اثنان ثمانية.
هل لك أن ترسم لي خريطة , من فضلك ؟	ممكن ترسملي خريطة، لو سمحت؟	هل لك أن ترسم خريطة لي ، من فضلك ؟
هل بإمكاني اللمس ؟	بقدر ألمسه؟	هل يمكنني أن ألمسه ؟
يصعب العثور على هذا المكان . إنه في طريق ضيق يتفرع من الطريق الرئيسي .	صعب يلتقى هالمكان. هو بدخلة بتتفرع من الشارع الرئيسي.	صعب أن يلتقي هذا المكان. إنه مدخل في الشارع الرئيسي.
هلا أخذت هذه السراويل ؟	ممكن توخذ هاي البنطلونات؟	هل يمكنك أن تأخذ هذه البنطلونات ؟
حسنا . إنها تتكلف خمسة وثمانون دولارا في البريد العادي وثلاثة دولارات في التوصيل الخاص .	طيب. بتكلف خمسة وثمانين دولر بالبريد العادي وثلاث دولرات بالتوصيل الخاص.	حسنا. إنها خمسة وسبعون دولارا بالبريد العادي وثلاث دولارات بالتوصيل الخاص.
إذاً يمكنني بكل ثقة أن أزكي برج مدينة سان فرانسيسكو . فهذا يعطيك فكره عن سان فرانسيسكو .	يعني بنصحك عالأكيد ب برج مدينة سان فراسيسكو. رح يعطيك لمحة عن سان فرانسيسكو.	يعني ذلك أنه ينصحك في برج مدينة سان فراسيسكو. سوف يعطيك لمحة عن سان فرانسيسكو.
لدي تقدير كبير للموسيقى الكلاسيكية .	كثير بقدر الموسيقى الكلاسيكية.	كثيراً ما أستطيع سماع الموسيقى الكلاسيكية.
من فضلك استعمل غرفة القياس هناك .	من فضلك استخدم غرفة القياس هنيك.	من فضلك استخدم غرفة القياس هنا.
سر في نفس الاتجاه حوالي خمس دقائق ثم لف لجهة اليسار .	امشي بنفس الاتجاه حوالي خمس دقايق و بعدين ارجع على الشمال.	امشي في الاتجاه نفسه حوالي خمس دقائق ثم ارجع إلى اليسار.
هل أجعله يعاود الاتصال بك عندما يعود ؟	بتحب أخليه يرجع يرنلك بس يرجع؟	هل تحب أن أجعله يتصل بك فقط عندما يعود ؟
من المرجح أن محبا للإبداع الفني مثلك سيستمتع اللوحات الزيتية غير التقليدية وعروض الموسيقى بالشوارع .	متوقع من محب للابداع الفني مثلك راح ينبسط باللوحات الزيتية والموسيقى وعروض الموسيقى بالشوارع.	أعتقد أن محباً للابداع الفني مثلك سوف يستمتع باللوحات الزيتية وعروض الموسيقى في الشوارع.
هل رشحت لي رحلة قصيرة ؟	هل اخترتلي رحلة قصيرة؟	هل اخترت لي رحلة قصيرة ؟
إنها سبعة عشر ايه . اوه ، انا آسف . لقد أخطأت .	هي سبعتعشر ايه . اوه ، أني آسف . غلطت	إنها سبعة عشر إيه. أوه ، أنا آسف. لقد أخطأت.
كم المدة التي قضتها هي حتى الآن في المملكة المتحدة ؟	قديش المدة اللي عاشتها بإنجلترا؟	كم المدة التي قضتها في إنجلترا ؟
هل قرّرتَ ؟	قررت؟	هل قررت ؟
هل نذهب إلى أي مكان متحدثين مثل ذلك ؟	راح نظل نحكي هيك وين ما نروح؟	هل سنستمر في الحديث عن ذلك حتى نغادر ؟
سأذهب كي أسأل البواب عن الأجرة المناسبة .	رايح اسأل البواب عن الأجرة الصحيحة.	سأسأل البواب عن الأجرة الصحيحة.
اللون البني محبب هذا العام .	اللون البني مرغوب هالسنة.	اللون البني مرغوب هذه السنة.
هناك قطع في بلوزتي . أتساءل هل يمكنك أن تخيطيه لي ، من فضلك ؟	في مزع ببلوزتي. بدي اسألك اذا بتقدر تخيطلي اياه، لو سمحت؟	هل يوجد مشط لبلوزتي ، من فضلك ؟
هل هذه هي آخر محطة ؟	هاظا آخر موقف؟	هل هذا آخر موقف ؟
هل يمكنني تركها في أي مكان من البلاد ؟	بقدر أسيبها بأي مكان بالبلد؟	هل يمكن أن أتركها في أي مكان في البلاد ؟
أريد بعض التفاح ، من فضلك .	بدي شوية تفاح، لو سمحت.	أريد بعض التفاح ، من فضلك.
أخشى أن لا يكون هنا أية دورة لتعليم الجولف .	خايف ما يكون في دورة لتعليم الجولف	أخشى ألا يكون هناك دورة لتعليم الجولف.
دعني أحول هذه المكالمة إلى المسئول .	خليني أحوّل هاي المكالمة للمسؤول.	دعني أحول هذه المكالمة إلى المسؤول.
هل يمكن أن تحجزوا في العرض ؟	ممكن تحجزولي بالعرض؟	هل يمكنك أن تحجز لي في العرض ؟
أنا أقيم في فندق هيلتون .	أنا قاعد بفندق الهلتون.	أنا في فندق هيلتون.
أحب هذه الخدمة بتقديم شامبانيا للتحية بعد الإقلاع . دعني أشرب فى صحتك .	بحب هاي خدمة توزيع شامبانيا للترحيب بعد ما نطير. خليني أشرب بصحتك.	أحب هذه خدمة توزيع شامبانيا للترحيب بعد الإقلاع. دعني أشرب في صحتك.
ما هو الحد الأدنى للعمر لفعل ذلك ؟	إيش أقل عمر مسموح يعمل هيك؟	ما هو أقل عمر مسموح به للعمل ؟
إلى فندقي ، من فضلك ، إن عنوان فندقي في هذه الورقة .	للفندق تبعي، لو سمحت، العنوان تبع الفندق ع هالورقة.	إلى الفندق التابع لي ، من فضلك ، العنوان الخاص بالفندق على هذه الورقة.
أريد لقاء السيد ويليم .	بدي أشوف الأستاذ ويليم.	أريد أن أرى السيد ويليم.
النبيذ ليس باردا بشكل كافي . هل نمكنك أن تجعله أكثر برودة ؟	الواين مش بارد كفاية. ممكن تبرده اكثر؟	الواين ليس بارداً كفاية. هل يمكنك أن تبرده أكثر ؟
بكم هذا العطر ؟	بقديش هاظا العطر؟	ما هو هذا العطر ؟
بالتأكيد سوف ترسلهم ، أليس كذلك ؟	أكيد راح تبعتثم، صح؟	بالتأكيد ستتعرض للتحرش ، أليس كذلك ؟
أسف ، هذا المكان محجوز بالفعل .	آسف، هاذ المكان محجوز فعلاً.	آسف ، هذا المكان محجوز بالفعل.
من فضلك أعطني بعض النقود الفكة .	لو سمحت أعطيني شوية فراطة.	من فضلك أعطني بعض الفكة.
لا أعرف شيئاً عن هذا الأمر .	ما بعرف إشي عن هالشغلة.	لا أعرف شيئاً عن هذه المهمة.
حفلتك مقامة الآن . تفضل .	حفلتك مبلشة هسا. تفظل.	حفلتك مبللة الآن.
أخطط للبقاء لمدة اثنا عشر يوماً .	بخطط أظل اثنعشر يوم.	أخطط للبقاء اثني عشر يوماً.
يوجد الكثير من السائحين بالقرب من المبنى ، ويبدو أنهم تجمعوا لإلقاء نظرة على ما يحدث .	في كتير سواح حوالين البناية، شكلهم متجمعين عشان يشوفوا شو اللي بصير.	هناك الكثير من الناس حول البناية ، ينتظرون لرؤية ما يحدث.
هل لك أن تقدر التكلفة قبل أن تبدأ العمل فيها ؟	ممكن تقدر قديش بكلف قبل ما تبدا شغل فيه؟	هل يمكنك أن تتصور كم يكلف قبل أن تبدأ العمل ؟
نعم . تم نقل أمتعة شخص آخر إلى غرفتي تواً . من فضلك ، هل من الممكن أن تقوم بفحصها ؟	اه، في شناتي لحدا ثاني وصلت غرفتي هسا.لو سمحت، ممكن تشوفها؟	نعم ، توجد حقائبي حتى الآن. من فضلك ، هلا رأيتها الآن ؟
أريد أن أحصل على تعويض لذلك .	أنا بدي اوخد تعويض عن هاظ.	أنا أريد الحصول على تعويض عن هذا.
بالتأكيد , كن على راحتك .	أكيد، كون على طبيعتك	بالتأكيد ، كون على طبيعته.
إن ثمة خطأ ما في بطاقة المفتاح هذه ، أعطني غيره ، من فضلك .	فيها غلطة شكلها بالكارت هاي، عطني وحدة ثانية، الله يخليك.	هناك خطأ ما في هذا الكارت ، أعطني واحدة أخرى ، من فضلك.
من فضلك اتصل لي برقم ثلاثة اثنان ستة اثنان تسعة واحد ثمانية .	لو سمحت، رنلي على الرقم ثلاثة اثنين ستة اثنين تسعة واحد ثمانية.	من فضلك اتصل بالرقم ثلاثة اثنان ستة اثنان تسعة واحد ثمانية.
أين مدخل مترو الأنفاق ؟	وين دخلة المترو؟	أين مدخل محطة مترو الأنفاق ؟
معذرة . ولكني أريد تسليم تقرير السرقة .	معلش، بس بدي أسلم تقرير السرقة.	معذرة ، ولكن أريد أن أحرر تقرير السرقة.
هذا المقاس ، الذي تسميه المقاس العادي ، سوف تجده هنا .	هاذ الحجم ، اللي بتسميه حجم عادي، راح تلاقيه هون .	هذا الحجم ، الذي تسميه حجم عادي ، سوف تجده هنا.
إنه رديء الصنع .	هو مش صنوع منيح.	إنه ليس صنوعاً جيداً.
هل يمكن أن تخبرني عن ساعات العمل ؟	ممكن تحكيلي عن ساعات الشغل؟	هل لك أن تخبرني عن ساعات العمل ؟
اعطني شهادة طبية , من فضلك .	عطيني وصفة طبية ، لو سمحت .	أعطني وصفة طبية ، من فضلك.
ليس معي فكة صغيرة .	ما معي فراطة.	ليس معي فراخ.
هل يمكن أن أرى هذا ؟	ممكن أشوف هاظا؟	هل يمكنني أن أرى هذا ؟
ليس لدى أي شئ لكي أعلنه .	ما عندي أي اشي عشان أعلنه.	ليس لدي أي شيء لأعلنه.
أعتقد أنني تركت كاميرتي وغادرت عندما كنت أتناول العشاء هنا الليلة الماضية .	بظن اني تركت كميرتي و روحت لما كنت اكل هون امبارح عالعشا.	أعتقد أنني تركت محفظتي عندما كنت أتناول الطعام هنا أمس الأول.
دعنا نجتمع لنبحث الأمر أكثر .	خلينا نلتقي عشان اناقش هاظ الموضوع أكثر.	دعونا نلتقي لمناقشة هذا الأمر أكثر.
هيه ، هذا فستان جميل حقا .	مرحبا ، هاذا فعلا فسطان حلو.	مرحبا ، هذا فستان جميل.
من فضلك كن صديقي بالمراسلة .	من فضلك, كون صاحبي عالتواصل.	من فضلك, كون صديقي على تواصل.
أعطني خمسين ، من فضلك .	اعطيني خمسين ، إذا سمحت.	أعطني خمسين ، من فضلك.
ما هذا المكان الذي نمر به الآن ؟	شو هالمكان اللي بنمر فيه هسا؟	ما هذا المكان الذي نمر فيه الآن ؟
هل لي في استعارة بعض البياضات ؟	ممكن أستعير شرارشف؟	هل يمكن أن استعير بعض الأربطة ؟
أوه , يبدو كأنه قرعة .	أوه، شكله قرعة .	أوه ، يبدو أنه قرعة.
اشعر كأن هناك تحديق في . هل من النادر رؤية شخص ياباني ؟	حاسك بتسرح فيه. لهاي الدرجة قليل تشوف واحد ياباني؟	أشعر باضطراب فيه. هل من الممكن أن ترى واحداً يابانياً ؟
سنبعث لك بالبريد عشرين عينة إضافية .	رح نبعتلك عالبريد عشرين عينة زيادة.	سنرسل لك بالبريد عشرين عينة إضافية.
إن الرصيف رقم خمسة يقع هناك .	الرصيف رقم خمسة موجود هناك.	الرصيف رقم خمسة موجود هناك.
أين يوجد مكان لطيف لقضاء نزهة ليوم واحد ؟	وين بلاقي مكان لطيف أظل فيه رحلة ليوم واحد؟	أين أجد مكاناً لطيفاً للإقامة فيه لمدة يوم واحد ؟
يا سيد كاواي لدينا مائدة لك الآن . تفضل من هنا .	يا أستاذ كاواي، عنا طاولة الك حاليا. تعال من هون.	يا سيد كاواي ، لدينا مائدة ك الآن. تعال من هنا.
لا توجد مشكلة . إذا حضرت في الخامس من سبتمبر ، فسيكون بإمكانك الاستمتاع بعرض فيلم علمي لأن عندنا يوماً خاصاً مفتوحاً أول يوم جمعة من كل شهر .	ما في مشكلة. اذا اجيت بخمسة تسعة ، بتقدر تستمتع بالفلم العلمي لأنه احنا عنا يوم مميز مفتوح بأول جمعة من كل شهر.	لا بأس. إذا جئت في السادس عشر من أكتوبر ، يمكنك الاستمتاع بالفلم العلمي في أول جمعة من شهر يناير.
هل بإمكاني الحصول على طبق آخر مثل هذا ؟	بقدر آخذ صحن ثاني مثل هاذ؟	هل يمكنني الحصول على طبق آخر مثل هذا ؟
لا تهتم . على أي حال ، خذني من فضلك إلى مركز الحي الصيني . سأحاول أن أجده بنفسي .	ما تشيل هم. يلا، خذني لو سمحت لمركز الحي الصيني. راح احاول ادور الجهة وحدي.	لا تقلق. خذني من فضلك إلى مركز الحي الصيني. سأحاول أن أدور الجهة وحدها.
أهه ، هيا . دولارين فقط .	اها، يلا. بس دولارين.	نعم ، لا ، لا. دولاران.
سندويتشان برجر بالجبن ، من فضلك .	اثنين برجر بالجبنة، لو سمحت.	اثنان برجر بالجبن ، من فضلك.
أرغب في كريم مسائي للبشرة .	بدي كريم ليلي للبشرة.	أريد كريم ليلي للبشرة.
متى سنقلع ؟	أميت راح نقلع؟	متى سنتوقف ؟
هذا طيب ، على ما يبدو .	هاذ طيب ، من شكله.	هذا جميل ، من مظهره.
حسنا , الوقت متأخر إلى حد ما . أعتقد أنني يجب على أن أغادر الآن . شكرا جزيلا لك على الأمسية الرائعة .	ماشي, الوقت صار متأخر شوي. بظن انو لازم اروّح هسا. كتير شكرا على الليلة الممتعة.	حسناً, الوقت متأخر قليلاً. أعتقد أنه يتعين علي أن أغادر الآن. شكراً على الليلة الرائعة.
لقد سقطت من على درجات السلم .	وقعت من على درج السلم	سقطت من على درج السلم.
هذه السن في المقدمة تؤلمني .	هالسنة في الامام بتوجعني.	هذه السنة في الأمام تؤلمني.
من أي نوع من الجلد الصناعي صُنعت حقيبة السفر هذه ؟	شو نوع الجلد الاصطناعي المصنوع منه شنطة السفر هاي؟	ما نوع الجلد الاصطناعي المصنوع منه حقيبة السفر هذه ؟
أين نشأت سمكات الفراش هذه ؟	من وين جاية سمكات الفراش هاي؟	من أين تأتي أسماك الفراش هذه ؟
سأخطط لإرسال فواتير حاجياتي اليومية ، لذا من فضلك أخبرني العنوان و اسم الشخص المسئول من فضلك .	رح أبعث فواتير حاجاتي اليومية، عشان هيك لو سمحت أعطيني عنوان واسم الشخص المسؤول.	سأرسل فواتير حاجاتي اليومية ، من فضلك أعطني عنوان واسم الشخص المسؤول.
أريد نسخة من تقرير السرقة .	بدي نسخة من تقرير السرقة.	أريد نسخة من تقرير السرقة.
أريد السفر من شنغهاي إلى هاواي بالباخرة .	بدي أروح من شنغهاي لهاواي عالسفينة.	أريد الذهاب من شنغهاي إلى هواي على متن السفينة.
جريدة باللغة الإنجليزية ، لطفاً .	جريدة بالانجليزي، لو سمحت.	جريدة إنجليزية ، من فضلك.
هل هناك سيارة ليموزين ؟	في سيارة ليموزين؟	هل توجد سيارة أجرة ؟
لا أريد واحدة ضخمة .	ما بدي وحدة دفشة.	لا أريد واحدة دفشة.
أريد فندقاً آمنا يقدم إفطاراً جيدا ، من فضلك ؟	بدي فندق آمن ، بقدم فطور كويس ، لو سمحت ؟	أريد فندقاً آمناً ، يقدم إفطاراً جيداً ، من فضلك ؟
أربعة وعشرين دولاراً . هل تريد المزيد ؟	أربعة وعشرين دولار. بدك كمان؟	أربعة وعشرون دولاراً. هل تريد المزيد ؟
وقعت منى الشوكة . من فضلك أحضر واحدة أخرى .	وقعت مني الشوكة. لو سمحت جبلي وحدة ثانية.	سقطت مني الشوكة. من فضلك اجعلني واحدة أخرى.
لاحظ الفجوة ، لاحظ الفجوة ، ثم قرب الأبواب ، من فضلك .	لاحظ الفتحة، لاحظ الفتحة ، بعدين قرب الابواب، لو سمحت.	لاحظ الفتحة ، لاحظ الفتحة ، ثم قرب الأبواب ، من فضلك.
من فضلك ساعدني أعثر على مرشد يتحدث اليابانية .	لو سمحت ساعدني ألاقي دليل سياحي بحكي ياباني.	من فضلك ساعدني في العثور على مرشد سياحي يتحدث اليابانية.
ماذا عن هذه النماذج البلاستيكة ؟	شو رأيك بموديلات البلاستك هاي؟	ما رأيك في موديلات البلاستك هذه ؟
دعونا نحتفل ، هكذا قال وآخذني إلى بار . وقال إنه سيُجري مكالمة هاتفية وغادر ولم يعد أبداً وتحملت أنا وحدي عبء فاتورة ضخمة .	"خلينا تحتفل" هيك قال وأخذني على البار. حكى انه رايح يعمل مكالمة وراح وما رجع إجى أبداً وأنا تورطت بفاتورة كبيرة.	دعنا نحتفل . لقد أخبرني أنه سيجرى مكالمة ولم يحضر أبداً. لقد أخبرني أنه سيجرى مكالمة كبيرة وأنا تورطت في فاتورة ضخمة.
أرغب في خلع أسناني .	أنا حاب أقلع سناني.	أنا أرغب في أن أدخن سناني.
أريد منبه ، من فضلك .	بدي منبه، لو سمحت.	أريد منبه ، من فضلك.
ما توقيت إجراءات مغادرة الفندق ؟	متى منقدر نعمل الاجراءات حتى نطلع من الفندق؟	متى يمكننا أن نقوم بالإجراءات لكي نخرج من الفندق ؟
أريد أن أحصل على استراحة .	بدي أوخذ بريك.	أريد أن آخذ مقعداً.
هذه الغرفة اثنان صفر واحد . أريد أن أطلب إفطار الغد .	هاي الغرفة رقم اثنين صفر واحد. بدي أطلب فطور بكرا.	هذه غرفة رقم اثنان صفر واحد. أريد أن أطلب إفطار الغد.
هل هذا مصنوع من القطن ؟	هاذ مصنوع من القطن؟	هل هذا مصنوع من القطن ؟
ما هو مقدار الرسوم للوزن الزائد ؟	قديش الدفع على الوزن الزايد؟	كم يبلغ الثمن على الوزن الزائد ؟
لدي معداتي الخاصة .	عندي أدواتي الخاصة.	لدي أدواتي الخاصة.
في غرفة انتظار بالمحطة .	في غرفة انتظار بالمحطة.	يوجد غرفة انتظار في المحطة.
كيف أستطيع مساعدتك ؟	كيف بقدر اساعدك ؟	كيف يمكنني مساعدتك ؟
ادخل . من فضلك ضعها على المائدة هناك .	أدخل. لو سمحت حطها على الطاولة هنيك.	ادخل. من فضلك ضعها على المائدة هنا.
حسناً . سأتأكد أن حقائبك ستكون هنا .	طيب . راح أتأكد إنه الشناتي رح تكون هون.	حسنا. سأتأكد أن الحقائب ستكون هنا.
سنأتي في السابعة .	رح نيجي الساعة سبعة.	سنأتي في السابعة.
حقاً . اليوم هو الأحد ، والأحد هو أسوء الأيام .	فعلاً. اليوم الأحد، والأحد أسوأ الأيام.	بالفعل. اليوم الأحد ، والأحد أسوأ الأيام.
إما أن تصلحها أو تستبدلها ، من فضلك .	يا تصلحها يا تبدلها، لو سمحت.	يا تفسدها أو تبدلها ، من فضلك.
ربما أعطيك إجابة أفضل من تلك بعد عرضين .	يمكن أعطيك جواب أحسن من هاذ بعد ما أشوفه مرتين.	يمكن أن أعطيك جواباً أفضل من هذا بعد أن أرى هذا مرتين.
إن ارتفاعه ألفان وأربعمائة متر .	إنو ارتفاعه ألفين وأربعمية متر.	إن ارتفاعه ألف وثلاثمائة متر.
هل يمكن أن أستعيد متعلقات ؟	ممكن أرجع متعلقاتي؟	هل يمكن أن أعيد متعلقاتي ؟
هل بإمكاني إجراء طلبية ؟	بقدر اطلب؟	هل يمكنني أن أطلب ؟
إنه خطئي . ليس خطأك .	هاي غلطتي. مش غلطتك.	هذه غلطتي. إنها غلطتك.
لا يوجد أي منها .	ما في منهم.	لا يوجد منهم.
أريد غرفة بمنظر جميل .	بدي غرفة مع إطلالة حلوة.	أريد غرفة تطل على منظر جميل.
أنا ياباني .	أني ياباني.	أنا ياباني.
هل لديكم دبابيس زينة ذات تصميمات رائعة ؟	عندك بروشات شكلها حلو؟	هل لديك أي بروشات جميلة ؟
يبدوا أنني غير قادر على الحصول على الماء الساخن .	شكله مش قادر يجيب ميّة ساخنة.	يبدو أنه لا يستطيع أن يحضر كوباً من الماء الساخن.
هلا وقفت معي لالتقاط صورة ؟	بتقدر توقف معي شوي عشان نصور صورة؟	هل يمكنك أن توقف معي قليلاً لكي نلتقط صورة ؟
لا أعتقد أن ذلك يناسبني فجلدي جاف إلى حد ما .	ما بعتقد انه هاد بلبقلي، جلدي ناشف كثير.	لا أعتقد أن هذا جيد لي. جلدي ناشف جداً.
أكون ممتنا جدا لو أخذتني إلى الشاطئ .	راح أكون كثير ممنون لو توخذني لعند الشط.	سأكون سعيداً جداً لو أخذتني إلى عند الشاطئ.
هل يمكنني الحصول على تذكرتين درجة ثانية لشيكاغوا , من فضلك ؟	ممكن أحجز تذكرتين لشيكاغو من الدرجة الثانية، لو سمحت؟	هل يمكنني حجز تذكرتين إلى شيكاغو من الدرجة الثانية ، من فضلك ؟
أجل ، أنا . لقد كانوا يعيشون بجواري في كاليفورنيا لكنهم انتقلوا إلى فلوريدا منذ عامين . ماذا عنك ؟ هل تسافر بمفردك ؟	أيوه، أنا. كانوا عايشين بحدي بكاليفورنيا بس انتقلوا على فلوريدا من سنتين. شو بالنسبة الك؟ بتسافر لحالك؟	نعم ، أنا. كانوا يعيشون في كاليفورنيا ولكنهم انتقلوا إلى فلوريدا منذ سنتين. ماذا عنك ؟ هل تسافر إلى هناك ؟
أنا من طوكيو .	أني من طوكيو.	أنا من طوكيو.
أي منتجات صوفية أخرى ؟	في منتجات صوف ثانية؟	هل هناك منتجات صوف أخرى ؟
هل من الممكن أن تخبرنا كيف تقيم هذه الخطة ؟	ممكن تحكيلنا كيف بتعمل هاي الخطة ؟	هل لك أن تخبرنا كيف تعمل هذه الخطة ؟
مساء الخير . أهلا .	مسا الخير. أهلين.	مساء الخير. أهلا.
اخرج من ذلك الباب ، وانتظر عند المحطة رقم ستة .	طلع من هاي الباب، و انطر عند المحطة رقم ستة.	خرج من هذا الباب ، وانعطف عند المحطة رقم ستة.
سبعاً ، من فضلك .	سبعة، لو سمحت.	سبعة ، من فضلك.
مهزوز ، وليس مضروب .	محرك، مش مخفوق.	محرك ، ليس مخفوق.
ثلاثة أيام .	ثلاث أيام.	ثلاثة أيام.
تريد أن تشتري ثوبا .	هي بدها تشتري فسطان.	إنها تريد شراء فساتين.
لا ، ليس بعد ، هناك الكثير نختار فيه .	لا، بعده ، في كثير عشان تنقي منه	لا ، بعده ، هناك الكثير لتتخلص منه.
سر في خط مستقيم على طول النهر حوالي نصف ميل . ستصل للمتنزه .	إمشي دغري على طول النهر حوالي نص ميل. بتصل المنتزه.	سيراً على طول النهر حوالي نصف ميل. تصل إلى المنتزه.
أسف أنني بحاجة إلى أن أطلع على أي مستند لتحديد الهوية .	أسف أني بحاجة إني أشوف اثبات هوية.	آسف أني بحاجة إلى أن أرى بطاقة هوية.
كن حذراً ، السقف منخفض .	انتبه ، السقف واطي.	انتبه ، السقف مائل.
كم تتقاضى لتطبيع صور الفيلم ؟	قديش بتوخذ عشان تطبع صور الفلم؟	كم تتقاضى لطباعة صور الفيلم ؟
هل يدخل هذا في حدود المعفي من الضرائب ؟	هاظ معفي من الضرايب؟	هل هذا معفى من الضرائب ؟
غرفة مفردة بدون دش من فضلك .	غرفة مفردة بدون دش لو سمحت .	غرفة مفردة بدون دش من فضلك.
هل يمكن أن تدلّني أين أجد القنصلية اليابانية ؟	ممكن تحكيلي وين بقدر ألاقي القنصلية اليابانية؟	هل يمكنك أن تخبرني أين يمكنني أن أجد القنصلية اليابانية ؟
من فضلك ضعها في قمع .	لو سمحت حطها ببوري.	من فضلك ضعها في النافذة.
نصف أوقية من شانيل رقم خمسة من فضلك .	نص أوقية من شانيل رقم خمسة، لو سمحت.	نصف أوقية من شانيل رقم خمسة ، من فضلك.
شخصان .	شخصين.	شخصين.
هل تعرف ما إذا كان هناك أي فنادق رخيصة الأسعار ؟	بتعرف اذا في أي فنادق رخيصة؟	هل تعرف أي فنادق رخيصة ؟
أريد أن أقدم طلباً للحصول على إصدار جديد .	بدي أقدم طلب مشان اخد إصدار جديد.	أود تقديم طلب للحصول على إصدار جديد.
أريد بزة .	بدي سترة.	أريد سترة.
هذا مكلف نوعا ما .	هاي بتكلف شوي.	هذه تتكلف قليلا.
لقد طلبت لحما لا سمكا . هل يمكنك تغيير هذا ؟	طلبت لحم مش سمك. ممكن تغير هاي؟	طلبت لحماً لا سمكاً. هل يمكنك أن تغير هذه ؟
عذراً . هل يوجد محل كتب قريب من هنا ؟	عفواً . في مكتبة بتبيع كتب قريب من هون ؟	معذرة. هل توجد مكتبة لبيع الكتب بالقرب من هنا ؟
حينئذ سنأخذها .	بهالوقت رح نوخذها.	في هذا الوقت سنأخذها.
إنه بعيد جداً . يحسن بك أن تأخذ سيارة أجرة .	هو بعيد كتير. فضل أكيد تاخذ تكسي.	إنه بعيد جداً. من فضلك اطلب سيارة أجرة.
في أي وقت نبدأ ؟	على أي ساعة راح نبلش؟	في أي وقت سنبدأ ؟
حسناً . لقد تم التأكيد . هل يمكننا أن نأخذ رقم تليفونك في حالة الحاجة إلى الاتصال بك ؟	ماشي، اتأكدت . بنقدر نوخذ رقمك تلفونك في حال احتجنا نتصل فيك؟	حسناً ، تأكدت. هل يمكننا أخذ رقم هاتفك في حالة الاتصال بك ؟
حسنا . خصم خمسة في المائة . هل يوافقك لك ؟	ماشي ، خصم خمسة بالمية. بمشي معك؟	حسنا ، خصم خمسة بالمائة. هل تسير معك ؟
الآن ، مكالمتك ردت . تفضل من فضلك .	حاليا، مكالمتك رجعت. تفضل لو سمحت.	الآن ، مكالمتك عادت. تفضل من فضلك.
أوه ، أهي كذلك ؟ كيف تفضلها ؟	أووه، هي هيك؟ كيف بتحبها؟	نعم ، هي كذلك ؟ كيف تحبها ؟
أنا فقدت أثر بريد مسجّل .	ضيعت أثر رسالة مسجلة.	لقد فقدت أثر رسالة مسجلة.
لا أشعر بحالة جيدة . هل ترشدني إلى طبيب ؟	ما بحس حالي ملبح. ممكن ادلني على دكتور؟	لا أشعر بالتعب. هل يمكن أن تدلني على طبيب ؟
هل أنت ملم بجغرافيا اليابان ؟	إنت ملم بتظاريس اليابان؟	هل أنت ملم بخطوط اليابان ؟
لا أستطيع رؤية الشاشة جيداً من هنا ، هل يمكنني تبديل المقاعد لبعض الوقت ؟	أنا مش قادر أشوف الشاشة مليح من هون. ممكن نبدل المقاعد شوي؟	أنا لا أستطيع رؤية الشاشة جيداً من هنا. هل يمكن أن نبدل المقاعد قليلاً ؟
سعر الغرفة هو ستة آلاف ين في الليلة .	سعر الغرفة ست آلاف ين لليلة.	سعر الغرفة ستة آلاف ين لليلة.
أعتقد أن سيارتي تستحق حوالي خمسة آلاف دولارا .	أنا بتوقع سيارتي بتسوى حوالي خمس الآف دولار.	أنا أعتقد أن سيارتي ستباع بحوالي خمسة آلاف دولار.
أين حديقة الحيوان ؟	وين حديقة الحيوانات؟	أين حديقة الحيوانات ؟
هي تريد بيرة .	هي بدها بيرا .	إنها تريد بيرة.
هل هذه الحقيبة مناسبة لكل حالات الطقس ؟	هاي الشنتة بتناسب كل حالات الجو؟	هل هذه الحقيبة تناسب كل ظروف الجو ؟
أفضل شيء هو اسطوانة مصغرة .	أحسن اشي هو سي دي صغير.	أفضل شيء هو سي دي صغير.
فهمت ، في هذه الحالة ليس علىّ أن أدفع أجر التبديلات ، أليس كذلك ؟	فهمت، بهاي الحالة ما عليي أدفع فلوس التبديلات، مش هيك؟	أفهم ، في هذه الحالة لا أدفع رسوم التبديلات ، أليس كذلك ؟
هل يمكنك أن تريني حجماً أكبر بقليل ؟	ممكن توريني سايز اكبر شوي؟	هل لك أن تريني بعض الشاي الأخضر ؟
هل يمكنك بطريقة ما أن تصف لي مرضك بالإنجليزية ؟	بتقدر بأي طريقة تشرحلي مرضك بالإنجليزي؟	هل يمكنك بأي وسيلة تشرح مرضك بالإنجليزية ؟
انتقلنا إلى هذا المنزل منذ عام .	رحلنا لهاظ البيت من سنة.	لقد غادرنا هذا المنزل منذ سنة.
معذرة ، هل يسعني أن أتوجه إليك بسؤال ؟	معلش، بقدر أوجهلك سؤال؟	معذرة ، هل يمكن أن أوجه سؤالاً لك ؟
هذا سعر مرتفع ، أليس كذلك ؟	هاظا سعره غالي، صح؟	هذا سعره مرتفع ، أليس كذلك ؟
نعم ، ولكن تأكد أن تذكرتك معك .	ايوه، بس تأكد إنه تذكرتك معك.	نعم ، لكن تأكد من أن تذكرتك معك.
ما رأيك في موضوع التحرش الجنسي في مكان العمل ؟	شو رأيك بالتحرشات الجنسية اللي بتصير بمكان الشغل؟	ما رأيك في التحرشات الجنسية التي تحدث في مكان العمل ؟
أريد تذكرتين ذهاب وعودة إلى أكسفورد .	بدي تذكرتين روحة رجعة على أكسفورد.	أريد تذكرتين ذهاب وعودة إلى أكسفورد.
هل ستذهب إلى المدرسة هنا ؟	رح تروح عالمدرسة هون؟	هل ستذهب إلى المدرسة هنا ؟
أود بعضاً من فيلم رقم ايه إس ايه لهذه الكاميرا ، من فضلك .	بدي فيلم رقم ايه إس ايه لهاي الكميرا، لو سمحت.	أريد فيلم رقم إيه إس إيه لهذه الكميرا ، من فضلك.
أصبت بسحجة .	أني انشخطت.	أنا أصبت بالذعر.
أريد تسجيل أمتعتي .	بدي أسجل شنطي.	أريد تسجيل حقائبي.
أريد أن أرى ذاك الذي في نافذة العرض ، من فضلك .	بدي أشوف هاذ الموجود بالواجهة، لو سمحت.	أريد أن أرى هذا الموجود في الواجهة ، من فضلك.
ما هي المحتويات ؟	شو المكونات؟	ما هي المكونات ؟
لقد تعطلت سيارتي . من فضلك احضر لتأخذها .	سيارتي خربت. تعال خذها لو سمحت.	سيارتي تعطلت. تعال خذها من فضلك.
ما النمط الذي في مخيلتك ؟	شو النمط اللي بخيالك؟	ما هو النمط الذي تتخيله ؟
كيف تسير الأمور ؟	كيف ماشية الأمور؟	كيف تسير الأمور ؟
ألا تسأله أن يتصل بي ؟	بتقدر تحكيله يتصل فيّ؟	هل يمكنك أن تتصل بي ؟
ما الغرض منها ؟	شو الهدف منها؟	ما الهدف منها ؟
كيف يربي الآباء اليابانيون أولادهم ؟ هل هم صارمون مع أطفالهم ؟	كيف بيربو الآباء اليابانيين ولادهم؟ همة شديدين مع عيالهم؟	كيف يبرم الآباء اليابانيون أبناءهم ؟ إنهم شديدو الحرص على أبنائهم ؟
هلا ضغطت على زر مصراع النافذة ؟	ممكن تكبس كبسة الشباك؟	هل لك أن تضغط على النافذة ؟
أيمكنني أن أذهب هناك بمترو الأنفاق ؟	بقدر أروح هناك بالمترو؟	هل يمكنني الذهاب إلى هناك بالمترو ؟
دعنا نشاهد التلفزيون . فيها مباراة بيسبول .	خلينا نتفرج على التلفزيون. في مباراة بيسبول.	دعنا نتفرج على التلفاز. في مباراة بيسبول.
حسناً . خذ هذا الاتجاه . من فضلك ، سأوصلك إلى غرفتك .	ماشي، خذ هاي الطريقة. لو سمحت، رح أوصلك لغرفتك.	حسناً ، خذ هذه الطريقة. من فضلك ، سأوصلك إلى غرفتك.
أريد تمويج متقارب لشعري ، من فضلك .	بدي أعمل شعري كيرلي ، لو سمحت.	أريد أن أعمل شعري كاحلي ، من فضلك.
نريد مائدة في الشرفة .	بدنا طاولة على البرندة.	نريد مائدة على البرندة.
معدتي ثقيلة .	معدتي كبيرة.	معدتي كبيرة.
أعد ذلك , من فضلك .	عيدها، لو سمحت.	عيدها ، من فضلك.
سآخذ صورة لجاك دانيلز .	راح آخذ صورة لجاك دانيلز.	سألتقط صورة لجاك دانيلز.
هل لديكم أطباق ذات سعرات حرارية منخفضة ؟ فأنا أتبع نظاما غذائياً حالياً .	عندكو وجبات قليلة الكالوريز ؟ أنا ماشية بدايت هالأيام.	هل لديكم وجبات قليلة الكالوريز ؟ أنا أتجول في هذه الأيام.
ما هي الفوارق بين هذه الفنادق ؟	شو الفرق بين هاي الفنادق؟	ما الفرق بين هذه الفنادق ؟
لم أقم بالحجز .	ما عملت حجز.	لم أعمل حجزاً.
هل لديك أية فكة لعداد الانتظار ؟	عندك عملة للبارك ميتر؟	هل لديك عملة للبارك ميتر ؟
أيهما تفضل , داكن أم فاتح ؟	شو بتحب أكثر, غامق أو فاتح؟	ماذا تحب أكثر ، غامق أم فاتح ؟
حسناً سيدي . وما الحلو الذي تريد أن تختم به الطعام ؟	طيب يا استاذي.. شو الحلو اللي بدك تختم فيه الأكل ؟	حسناً يا سيدي. ما هو الحلو الذي تريد أن تختم به الطعام ؟
إنني أسجل لخروجي من الفندق . هلا أرسلت خادماً إلى أعلى ؟	أني بعمل تشيك اوت. ممكن تودي عامل لفوق؟	أنا أعمل تشيك أوت. هل يمكنك أن تصعد عاملاً إلى أعلى ؟
كيف يمكنني الذهاب إلى ديزني لاند ؟	شلون بقدر أروح على ديزني لاند؟	كيف يمكنني الذهاب إلى ديزني لاند ؟
الآن ، هذه اللوحة خاصة جداً . رسمها تسوروتارو كاتاأوكا . إنه معروف بأنه فنان عالمي .	هسا، هاي اللوحة كثير مميزة. رسمها تسوروتارو كاتاأوكا. معروف هاذ فنان عالمي.	الآن ، هذه اللوحة رائعة. إنها لتسوروتارو كاتاأوكا. معروف هذا الفنان عالمياً.
هذه المظلة يمكن استخدامها كعصا للسير .	هاي الشمسية بقدر استخدمها كعصاية.	هذه الشمسية يمكنني استخدامها كعصاية.
لأن الصيف في اليابان عادة ما يكون شديد الحرارة ، ولم يكن لدينا تكييف هواء قديماً .	لأنه الصيف باليابان عادة بكون حامي كثير، وما كان عندنا مكيف هوا زمان.	لأن الصيف في اليابان عادة حار جداً ، ولم يكن لدينا مكيف هواء في الماضي.
الشيء نفسه لي ، من فضلك .	ونفس الشي إلي ، لو سمحت.	نفس الشيء لي ، من فضلك.
يوم الصحة الرياضية هو يوم العاشر من أكتوبر وهو إجازة قومية الغرض منها تحسين صحة المواطنين .	يوم الصحة الرياضية بعشرة عشرة بكون عطلة وطنية عملوه عشان يرفعوا مستوى الصحة عند الناس.	يوم الصحة الرياضية العاشر سيكون عطلة وطنية لأنهم أرادوا رفع مستوى الصحة لدى الناس.
هل من الممكن أن تنظف المنضدة من فضلك ؟	ممكن تنظف الطاولة، لو سمحت؟	هل يمكنك تنظيف المائدة ، من فضلك ؟
يوجد عصير أناناس وبرتقال وطماطم .	في عصير أناناس و برتقال و بندورة.	يوجد عصير أناناس و برتقال وبطاطس.
أود الإقامة بهذه الغرفة ليلة واحدة أخرى .	بدي أظل بهاي الغرفة ليلة ثانية.	أريد البقاء في هذه الغرفة ليلة أخرى.
ثمانية دولارات . وهنا تأتي واحدة حالا .	ثمن دولرات. وهون بتيجي وحدة هسا.	ثمن دولاران. وهي تأتي الآن.
هذا حسن بالنسبة لي . في الواقع أحب أن أدخن .	هاذ تمام بالنسبة إلي . بصراحة أني بحب أدخن.	هذا حسن بالنسبة لي. أنا أحب التدخين.
المكان كان على كرسي في البهو .	المكان كان عكرسي باللوبي.	المكان كان في الطابق العلوي.
أشعر بصداع خفيف .	حاس بصداع خفيف.	أشعر بصداع خفيف.
ألو ، اسمي أودا . عندي حجز الليلة ، لكن سوف أتأخر في القدوم . لهذا من فضلك اتركوا لي الحجز .	مرحبا، اسمي أودا. عندي حجز هالليلة، بس راح يتأخر وصولي. يرجـى خليكو الحجز لي.	مرحبا ، اسمي أودا. لدي حجز هذه الليلة ، ولكن سوف يتأخر وصولي.
أين قسم السفر ؟	وين قسم السفر؟	أين قسم السفر ؟
هل لديك أي صورة لبطاقة هوية ؟	عندك اي صورة للهوية؟	هل لديك أية صورة للهوية ؟
هل لك أن تعطيني إشارة بالضوء عندما تكون فيها ؟	بتقدر تعطيني إشارة بالضو لما تكون فيها؟	هل يمكن أن تعطيني إشارة بالضوء عندما تكون هناك ؟
أريد فحص هذه الحقائب المتجه إلى طوكيو , من فضلك .	بدي اتفقد هالشناتي اللي رايحة لطوكيو، لو سمحت.	أريد أن ألتقط هذه الحقائب المتجهة إلى طوكيو ، من فضلك.
ثمة شئ خطأ في آلة التهوية هذه .	في اشي غلط بالمروحة هاذ.	هناك شيء خطأ في هذه المكيف.
منذ هذا الصباح .	من الصبح.	من الصباح الباكر.
من فضلك قس حجم حذائي .	لو سمحت قيس حجم كندرتي.	من فضلك قيس حجم كندرتي.
أوافق . إنه أحد الأماكن المفضلة لي .	موافق. هاذ واحد من احلا الاماكن عندي.	موافق. هذا واحد من أفضل الأماكن لدي.
لابد أن تكون هادئة .	لازم تكوني هادية.	يجب أن تكوني هادئة.
أريد مطفأة سجائر .	بدي منطفة سجاير.	أريد منطفة سجائر.
أود أن أتتناول طبقا مثل هذا .	بدي أوكل صحن زي هاظ.	أريد تناول طبق مثل هذا.
أين توجد أقرب مغسلة ؟	وين اقرب مغسلة؟	أين أقرب مغسلة ؟
هل لي بجدول مواعيد ؟	أعطيني جدول المواعيد؟	أعطني جدول المواعيد ؟
من فضلك اعطني هذه .	لو سمحت اعطيني هاي.	من فضلك أعطني هذه.
هل يمكن أن أذهب لمشاهدة المعالم أثناء رسو السفينة في الميناء ؟	بقدر أروح اشوف المناظر لما السفينة تكون راسية بالمينا؟	هل يمكنني أن أذهب لمشاهدة المناظر عندما تكون السفينة راسية في الميناء ؟
هل يوجد مكان يقبل تنظيف الملابس في أيام الآحاد ؟	في أي مكان بقبل طلبات الغسيل كل يوم أحد؟	هل يوجد أي مكان يقبل طلبات الغسيل كل يوم ؟
هل توجد خدمة نقل بالحافلات إلى متحف فورد ؟	في خدمة باصات بتروح على متحف فورد؟	هل هناك خدمة حافلات تذهب إلى متحف فورد ؟
أنا من النرويج .	أني من النرويج.	أنا من النرويج.
عشرة طوابع من فضلك .	عشر طوابع لو سمحت.	عشر طوابع من فضلك.
هل يمكنك أن تجر سيارتي ؟	ممكن تجرب سيارتي؟	هل يمكنك أن تجرب سيارتي ؟
إنه سمك ثعبان مشوي مع مرقة خاصة فوق سلطانية من الأرز .	هاذ سمك الانقليس مع صلصة خاصة محطوطة فوق سلطانية الرز.	هذا سمك الأنقليس مع صلصة خاصة توضع فوق صينية الأرز.
هل يمكنني إعادتها في مدينة مختلفة ؟	بقدر أرجعها بمدينة ثانية؟	هل يمكن أن أرجعها إلى مدينة أخرى ؟
عندي الدواء الخاص بي .	عندي الدوا تاعي.	لدي الدواء الخاص بي.
هل لديكم أفلام للصيف ؟	عندكو أفلام للصيف؟	هل لديكم أفلام للصيف ؟
هل تريد أن تذهب للتسوق معي بعد الظهر ؟	بتحب تيجي معي نتسوق بعد الظهر؟	هل تحب أن تأتي معي للتسوق بعد الظهر ؟
نعم ، سيدي . كيف تريدني أن اقطعها ؟	أيوة ، يا سيدي . كيف بدك إني أقصها؟	نعم ، يا سيدي. كيف تريد أن أقصها ؟
عندما أعود ثانية إلى اليابان ، سأكتب خطاباً . وإذا كان لديك وقت ، من فضلك أرسل لي خطاباً .	لما أرجع مرة ثانية لليابان، رح أكتب رسالة. وإذا كان عندك وقت، تكرم ابعثلي انا رسالة.	عندما أعود ثانية إلى اليابان ، سأكتب رسالة. من فضلك أرسل لي رسالة.
فراولة ، من فضلك .	فراولة، لو سمحت.	فراولة ، من فضلك.
هل تفضل ماسكات للشعر أصغر أم أكبر ؟	بتحبي القناع للشعر أصغر ولا أكبر؟	هل تحب القناع للشعر أصغر أم أكبر ؟
بالتأكيد . متى تود أن تلعب جولف ؟	طبعاً. أميت بدك تلعب جولف؟	بالتأكيد. متى تريد أن تلعب الجولف ؟
من فضلك اجعل الجزء العلوي أطول قليلاً .	من فضلك خلي الجزء الفوقاني أطول شوي.	من فضلك احتفظ بالجزء العلوي أطول قليلاً.
كم أوقية من العطر أستطيع الحصول عليه من غير رسوم ؟	كم وقية من العطر بقدر أوخذها بدون رسوم ؟	كم زجاجة من العطر يمكنني الحصول عليها بدون رسوم ؟
معذرة , قم بالضغط على مصراعي النافذة الخشبيين , من فضلك .	عفواً، نزل اباجور الشباك الخشب , لو سمحت.	معذرة ، نزل من النافذة الخشبية, من فضلك.
لدي ثلاث حقائب .	عندي ثلث شناتي.	لدي ثلاثة حقائب.
هذا البيت يبدو مريحا للمعيشة فيه , أليس كذلك ؟	هاد البيت مبين كثير مريح العيشة فيه، مش هيك؟	هذا البيت يبدو جميلاً جداً ، أليس كذلك ؟
أريد أن أغسل ملابسي في وقت لاحق اليوم .	بدي أغسل وعيتي بوقت ثاني اليوم.	أريد غسل وعيشي في وقت آخر اليوم.
أرجو ذلك .	بتمنى هيك.	أتمنى ذلك.
واحد لنيويورك ، من فضلك .	واحد لنيويورك، إذا سمحت.	واحد إلى نيويورك ، من فضلك.
لا ، إنها لا تشمل الضريبة ومصاريف الخدمة .	لا، هي ما بتشمل الضريبة ومصاريف الخدمة.	لا ، إنها لا تشمل الضريبة ومصاريف الخدمة.
قم بها بطريقتك .	اعملها بطريقتك.	اعملها بطريقتك.
كم تستغرق مشياً على الأقدام ؟	قديش بتوخذ وقت مشي عالجرين؟	كم تستغرق من الوقت للذهاب إلى جرين ؟
هل يمكنني الحصول على برنامج ؟	بقدر آخذ برنامج؟	هل يمكنني الحصول على برنامج ؟
من فضلك سجل عنوان الاتصال بك هنا .	من فضلك اكتب عنوانك للتواصل معك هون.	من فضلك اكتب عنوانك للتواصل معك هنا.
نعم ، يا سيد تاناكا هناك رسالتان لك .	أيوة، يا سيد تاناكا، في عندك رسالتين.	نعم ، يا سيد تاناكا ، لديك رسالتين.
هل لي في شيء من لحم الخنزير والبيض ؟	ممكن شوية من لحم الخنزير والبيض؟	هل يمكن أن بعض لحم الخنزير والبيض ؟
إذا حدث ذلك ، من فضلك أتصل بي .	اذا صار هيك ، لو سمحت رنلي .	إذا حدث ذلك ، من فضلك اتصل بي.
أوه ، آسف لأني أزعجتك .	اووه، معذرة الك ازعجتك.	نعم ، معذرة لقد أزعجتك.
هل يمكن أن أقيس مقاس تسعة .	ممكن أقيس مقاس تسعة ؟	هل يمكن أن أقيس مقاس تسعة ؟
ملابسه دائماً موضة قديمة .	هدومه دايما موضة قديمة.	يرتدي قبعته دائماً موضة قديمة.
هلا حجزت لي تاكسي الساعة السادسة صباح غد , من فضلك ؟	ممكن تحجزلي تكسي الساعة ستة الصبح لبكرا ، لو سمحت؟	هل يمكنك أن تحجز لي سيارة أجرة في السادسة صباحاً حتى صباح الغد ، من فضلك ؟
إنه صحيح هنا .	هو صحيح هون.	إنه صحيح هنا.
هل يمكن أن تدخل معه فكة صغيرة ؟	بتقدر ادخل معه شوية فراطة؟	هل يمكن أن أدخل معه بعض الفكة ؟
أنا حقا آسف .	أني جد آسف.	أنا آسف.
لقد طلبت ذلك .	طلبت هاظ.	لقد طلبت هذا.
ما تكلفة هذا في اليوم ؟	قديش تكلفته ليوم واحد؟	كم تبلغ تكلفته ليوم واحد ؟
لا توجد أية مشاكل .	ما في أي مشاكل.	لا توجد أية مشاكل.
أجل . سنصل في الثامنة حسب التوقيت المحلي .	أها. رح نوصل الساعة ثمنية بالتوقيت المحلي.	نعم. سنصل في السابعة بالتوقيت المحلي.
هل لديك واحد أكبر ؟	عندك واحد أكبر؟	هل لديك واحد أكبر ؟
أنا كينجي .	أني كينجي.	أنا كينجي.
إنه المبنى الثاني على يسار هذا المبني الأبيض .	البناية الثانية على يسار البناية البيضا.	المبنى الثاني على يسار البناية البيضاء.
أعطني قطعة لحم الخنزير هذه ، ولكن ليس بسمك تلك .	أعطييني قطعة لحمة الخنزير هاي، بس ما تكون سميكة مثل هذيك.	أعطني قطعة لحم الخنزير هذه ، لكنها ليست سميكة مثل هذه.
لدي موعد آخر .	عندي موعد ثاني.	لدي موعد آخر.
لدي غرفة جاهزة لك في جراند هويتل . هل تستطيع الذهاب إلى هناك ؟	عندي غرفة جاهزة إلك بالجراند هوتيل. بتقدر تروح لهناك؟	لدي غرفة جاهزة لك في جراند هوتيل. هل يمكنك الذهاب إلى هناك ؟
أرني واحدة لإحدى الشابات .	وريني وحدة لوحدة من الصبايا.	أرني واحدة واحدة من الصبايا.
أود أن أحجز غرفة لهذه الليلة .	بدي أحجز غرفة لهاي الليلة.	أريد حجز غرفة لهذه الليلة.
لقد خلعت البنطلون .	شلحت البنطلون.	لقد خلعت البنطلون.
إنها رائعة .	هاي روعة.	هذه رائعة.
أهذه هي الحافلة التي توصل إلى وسط المدينة ؟	هاظ هو الباص اللي بوصل لوسط البلد؟	هل هذا هو الأتوبيس الذي يصل إلى وسط المدينة ؟
أتظن ذلك ؟	بتظن هيك؟	هل تعتقد ذلك ؟
أود أن أرسله عن طريق البريد .	حاب أبعثه عن طريق البريد.	أود إرساله بالبريد.
أشكرك ثانية لأنك ذكرتني . هل يميل كثير من الناس أن ينسوا توقيع أسمائهم ؟	بشكرك مرة ثانية عشان ذكرتني. بروح كثير من الناس تنسى توقع ع أسمائهم ولا شو؟	أشكرك مرة أخرى لأنك ذكرتني. هل كثير من الناس تنسى أن توقع على أسمائهم أم ماذا ؟
هلا أرسلت تاكسي إلى المدخل الرئيسي لـ ويستمانستر مول ؟	ممكن تودي تكسي للمدخل الرئيسي بويستمانستر مول؟	هل يمكنك أن تستقل سيارة أجرة إلى المدخل الرئيسي بويستمانستر مول ؟
هل لديكم أية جولة سياحية أخرى ؟	عندك أي رحلة ثانية؟	هل لديك أية رحلة أخرى ؟
السيارة تصدر صاخبا غريبا .	السيارة بطلع صوت غريب وعالي.	السيارة تصدر صوتاً غريباً وعالي الصوت.
هذه سبعون دولار .	هاي سبعين دولار.	هذه سبعين دولارا.
أنا شديد الحساسية للقطط .	أني بتحسس كثير من البسس.	أنا أتحسس كثيراً من البسس.
لا . قليلاً في الأمام . هناك ، نعم .	لا. شوي لقدام. هناك، إيوه.	لا. هناك ، نعم. هناك ، نعم.
ركن المدخنين ، من فضلك . وشباك بجوار النافذة ، من فضلك .	ركن الشيشانيين، إذا سمحت. وشباك جمب النافذة، إذا سمحت.	ركن الشيشان ، من فضلك. نافذة تطل على النافذة ، من فضلك.
هل يكلفني دخول هذا المبنى أي أموال ؟	بدفع أي مصاري إذا فتت على هاي العمارة؟	هل سيدفع أي مبالغ إذا سقطت هذه العمارة ؟
سأكون هنا حتى التاسعة . يحدوني الأمل أن تتمكن من القبض على المجرم في أقرب وقت ممكن .	راح أظل هون للساعة تسعة. بتمنى إنكم تمسكوا المجرم بأسرع وقت.	سأبقى هنا حتى الساعة التاسعة. أتمنى أن تقبضوا على المجرم في أسرع وقت.
شكراً لك . من فضلك عاود مرة أخرى .	مشكور. يلا جرب مرة ثانية من فضلك.	شكراً. ها هو ذا قد جرب مرة أخرى من فضلك.
فاتتني محطتي .	راح علي الموقف.	لقد توقف الموقف.
أين يمكنني أن أقيم أثناء الجولة ؟	وين ممكن أسكن خلال الرحلة؟	أين يمكن أن أقيم خلال الرحلة ؟
إنه لمن دواعي السرور أن أتحدث معك .	إنسريت بالحكي معك.	لقد سُرقت منك.
أي مقاس تريد ؟	شو السايز اللي بدك ياه؟	ما هو الساتيز الذي تريده ؟
بالتأكيد ، هل تريد تسريحة متموجة دائما ؟	أكيد، بدك اياه كيرلي دايما؟	بالتأكيد. هل تريده لي دائما ؟
إلى اليسار ، من فضلك .	على اليسار، لو سمحت.	على اليسار ، من فضلك.
لقد أتلفت حقيبتي .	دمرت شنتتي.	لقد دمرت حقيبتي.
البيتزا لذيذة . من صنعها ؟	هاي البيتزا زاكية. مين عملها؟	هذه البيتزا رائعة. من قام بها ؟
أخشى أن أسأل ، لكن ماذا تعني ؟	بخاف اسأل، بس شو قصدك؟	أخشى أن أسأل ، ولكن ماذا تعني ؟
لا ، من فضلك اجلس وانتظر . سأعود بعد قليل .	لا، لو سمحت اقعد واستنى. راح أرجعلك بعد شوي.	لا ، من فضلك اقعد وانتظر. سأعود بعد قليل.
الكعب مرتفع جداً .	الكعب عالي كثير.	الحذاء عالي جداً.
كم سيستغرق إصدار التأشيرة لي ؟	قديش الفيزا بدها وقت عشان تطلع؟	كم من الوقت تستغرق للحصول على التأشيرة ؟
لقد تعطلت سيارتي .	خربت سيارتي .	لقد تعطلت سيارتي.
كيف أثر الركود على الشركة ؟	شلون أثر الركود عالشركة ؟	كيف أثر الركود على الشركة ؟
توجد رحلات جوية على شركات جال وانا التي تقلع في الساعة العاشرة وخمسة وخمسين دقيقة . ولكن , للأسف كلتا الرحلتين محجوزتان .	في طيارات على شركات جال وانا اللي بتغادر الساعة عشرة وخمسة وخمسين دقيقة. بس، للأسف الطيارتين مفللات.	هناك طائرات على شركات جال وأنا التي تغادر في العاشرة وخمس وأربعين دقيقة. لكن للأسف ، فإن الطائرتين مفللتان.
هل هذا سيفسد ؟	هاذ رح يخرب؟	هل هذا سيخرب ؟
هل يمكنك أن تخبرني بقيمة هذه المكالمة ؟	بتقدر تحكيلي تكلفة هاي المكالمة؟	هل يمكنك أن تخبرني تكلفة هذه المكالمة ؟
من الأفضل أن تضبط المرآة العاكسة للرؤية الخلفية .	أحسن شي تزبط المراية الخلفية.	أفضل شيء أن تضبط المرآة الخلفية.
كم أجرة التاكسي حتى هذا الفندق ؟	كم أجرة التكسي لعند الفندق؟	كم أجرة الحافلة إلى الفندق ؟
أريد مزيلا لطلاء الأظافر .	بدي أسيتون للمناكير.	أريد أسيتون للمناكير.
ما هي مكونات هذا الطبق ؟	شو مكونات هالصحن؟	ما مكونات هذا الصحن ؟
متى ينبغي أن آتي ؟	متى لازم آجي ؟	متى يجب أن آتي ؟
هل يمكن أن تخبرني عن الأماكن الشيقة هنا ؟	ممكن تحكيلي عن الأماكن الحلوة هون؟	هل يمكنك أن تخبرني عن الأماكن الجميلة هنا ؟
حسنا ، اضغط تسعة وصفر واحد واحد ، ثم الكود الخاص بالبلد ورقم الهاتف .	طيب، إكبس تسعة وصفر واحد واحد، وبعدين الكود تبع البلد ورقم التلفون.	حسناً ، اضغط تسعة وصفر واحد واحد ، ثم الكود الخاص بالبلد ورقم الهاتف.
أعتقد أنك ارتكبت خطأً . الغرفة دفع ثمنها مسبقاً . معي إيصال .	بظن إنك غلطت. الغرفة حاسبت عنها قبل. معي وصل.	أعتقد أنك أخطأت. الغرفة رقم واحد. لدي إيصال.
هل يمكنك أن تتحرك بهذا الاتجاه ؟	بتقدر تمشي بهالجهة؟	هل يمكنك السير في الاتجاه المستقيم ؟
سيغادر قطارك من الرصيف رقم ثمانية .	رح يطلع قطارك من السكة رقم ثمانية.	سوف يخرج قطارك من السكة رقم ثمانية.
أريد غرفة أخرى .	بدي غرفة ثانية.	أريد غرفة أخرى.
لماذا يحدث هذا ؟	ليش بصير هاذ ؟	لماذا يحدث هذا ؟
ما الرقم الذي أطلب منه هنا ؟	شو الرقم اللي بطلب منه هون؟	ما الرقم الذي يطلب منه هنا ؟
هل يوجد مطعم أرخص قريب من هنا ؟	في مطعم رخيص قريب من هون؟	هل يوجد مطعم جيد بالقرب من هنا ؟
هل يوجد مطعماً يمكنك أن تزكيه بالقرب من هنا ؟	في مطعم بتنصح فيه قريب من هون؟	هل يوجد مطعم تزكيه بالقرب من هنا ؟
أوبرا ميتروبوليتان .	أوبرا المتروبوليتان.	أوبرا المتروبوليتان.
أين المصعد ؟	وين الأصنصير؟	أين الأصناف ؟
هل يمكنك أن ترني أشياء أخري ذات تصميمات مختلفة .	ممكن توريني شغلات ثانية بأشكال غير؟	هل يمكنك أن تريني بعض المنتجات الأخرى بأشكال مختلفة ؟
ليس بمقدورك تغيير وظيفتك بسهولة .	ما بتقدر تغير شغلك ببساطة.	لا يمكنك تغيير عملك ببساطة.
ماذا تسمون هذا بالإنجليزية ؟	شو بتسموه هاذ بالإنجليزي؟	ما الاسم الذي تلفظونه بهذا الإنجليزية ؟
سأصل في التاسع من مارس وأغادر في الرابع عشر .	راح أوصل بتسعة ثلاث وراح أروّح بأربعطعش.	سأصل في التاسعة ثم أغادر في الرابعة عشر.
هل ستحدد موعداً للخروج معي ؟	بدك تحدد موعد لتطلع معي؟	هل تريد تحديد موعد لتقابلني ؟
لم اسمع بهذا العنوان من قبل بالقرب من هنا .	ما سمعت بهاذ المكان قبل هيك بالمنطقة هون .	لم أسمع بهذا المكان من قبل في هذه المنطقة.
سوف أحضر لك العرض الأسبوع القادم .	بدي اجهزلك العرض الاسبوع الجاي.	أود أن أعد لك العرض الأسبوع القادم.
صديقي مريض جداً . هل تستطيع أن تطلب دكتور ، من فضلك ؟	صاحبي كثير مريض. ممكن تطلب الدكتور، لو سمحت؟	صديقي مريض. هل يمكنك أن تطلب الطبيب ، من فضلك ؟
هل أخذت تذكرة الحافلة ؟	اخذت تذكرة الباص؟	هل أخذت تذكرة الحافلة ؟
يوجد لدى حوالي ألفي وخمسمائة دولار بالين الياباني .	أنا معي حوالي ألفين وخمسميت دولر بالين الياباني.	أنا معي حوالي ألف وتسعمائة دولار بالين الياباني.
هل يمكنني استئجار مرشداً يتحدث اللغة اليابانية ؟	ممكن أستأجر دليل بسولف ياباني؟	هل يمكن أن أستأجر مرشداً يتحدث اليابانية ؟
هذا بعينه ما كنت أبحث عنه .	هاي بالزبط اللي كنت بدور عليه.	هذه بالضبط ما كنت أبحث عنه.
رقم مقعدي دي اثنا عشر . أين هو ؟	رقم كرسيي دي اثنعش. وين هو؟	رقم مقعدي هو تسعة عشر. أين هو ؟
فينس وليندا يريدان أن يبقيا بمفرديهما ، لذا أخشى أنني لا بد أن أبقى هنا هذه الليلة .	فينس وليندا بدهم يظلوا لحالهم، فبخاف انو لازم اظل هون الليلة.	فينس وليندا يودون البقاء هنا الليلة. أخشى أن أبقى هنا الليلة.
إنها تبعد حوالي تسعة وتسعون ميلا .	هي بتبعد حوالي تسعة وتسعين ميل.	إنها تبعد حوالي تسعة وتسعين ميلا.
حسناً ، تم إعادة التأكيد على حجزك .	ماشي، اتأكدنا من حجزك مرة ثانية.	حسناً ، لقد تأكدنا من حجزك ثانية.
حسناً ، فلنق نظرة عليك .	طيب ، خلينا نطل عليك .	حسنا ، دعني أراك.
هل يجب على أن أجيب بـ نعم أو بـ لا ؟	لازم اجاوب بـ اه أو بـ لأ ؟	هل يجب أن أجيب بـ نعم أو بـ لا ؟
من فضلك ، بدلي شيك المسافرين إلي نقود .	لو سمحت اصرفلي هاد الشك السياحي كاش.	من فضلك اصرف هذا الشيك السياحي نقداً.
من فضلك دلني على أرخص وسيلة للذهاب إلى سان فرانسيسكو .	من فضلك دلني على أرخص طريقة حتى أروح على سان فرانسيسكو.	من فضلك دلني على أرخص طريقة للذهاب إلى سان فرانسيسكو.
أريد غرفة مفردة بحمام لقاء ثمانين دولارا ، من فضلك .	بدي غرفة فردية مع حمام بـثمانين دولار, لو سمحت.	أريد غرفة فردية مع حمام بثمانين دولاراً ، من فضلك.
من فضلك ، هل رسمت لي خريطة بسيطة من هنا ؟	من فضلك، بتقدر ترسملي خريطة سهلة من هون؟	من فضلك ، هل يمكنك أن ترسم خريطة سهلة من هنا ؟
ليس لدي أية مضارب أو أحذية .	ما عندي لا مظارب ولا أحذية.	ليس لدي مظاريف ولا أحذية.
أوه ، يبدو أنني افقد شيء ما كل وقت أسافر فيه .	أوه، شكلني بضيع اشي كل مرة بسافر فيها.	أوه ، يبدو أنني أضيع شيئاً كل مرة أسافر فيها.
أجل ، إنها مفتوحة من التاسعة حتى التاسعة .	أها ، هي فاتحة من الساعة تسعة للساعة تسعة.	نعم ، إنها مفتوحة من التاسعة حتى التاسعة.
سيأتي القطار السريع التالي بعد ساعة .	راح يجي القطار السريع الجاي بعد ساعة.	سوف يأتي القطار السريع القادم بعد ساعة.
مرحبا . كيف حالك ؟	مرحبا . كيف حالك؟	مرحبا. كيف حالك ؟
تاريخ الانتهاء تسعة عشر من مارس تسعة وتسعين .	تاريخ انتهاء الصلاحية تسعطعش من شهر ثلاث التسعة وتسعين.	تاريخ انتهاء الصلاحية في التاسع عشر من سبتمبر التاسع وتسعين.
هلا احتفظت بهذا لي ؟	ممكن تظبلي هاد؟	هل يمكن أن تلاحظ هذا ؟
هل تقبل بالين الياباني ؟	بتوخذ بالين ياباني؟	هل تأخذ بالين ياباني ؟
من فضلك ، اكتب رقم الغرفة في الخلف .	من فضلك ، اكتب رقم الغرفة بقفى الورقة.	من فضلك ، اكتب رقم الغرفة على الورقة.
هل يمكنك أن تصلح ذلك ؟	بتقدر تصلح هاي؟	هل يمكنك إصلاح هذه ؟
سيداتي سادتي ، لدينا على متن رحلتنا اليوم مضيفين يتحدثون اليابانية يمكن التعرف عليهم من خلال الشارة التي يلبسونه . إذا كنت تعرف أي شخص يريد مساعدة في الترجمة ، من فضلك دعنا نعرف .	سيداتي وسادتي،برحلتنا اليوم، عنا مضيفين بحكوا ياباني بتعرفوهم من الباجة اللي لابسينها. إذا بتعرف إنه أي حد بحتاج مساعدة بالترجمة، لو سمحت خلينا نعرف.	سيداتي وسادتي ، في رحلتنا اليوم ، لدينا مضيفون يتحدثون اليابانية من خلال الملابس التي يرتدونها. إذا كنت تعرف أن أي شخص يحتاج إلى مساعدة في الترجمة ، من فضلك دعنا نعرف.
هل يجب أن أدفع الرسم الإضافي عندما أدخل مبنى ؟	لازم أدفع رسوم ثانية بس أفوت عأي مبنى؟	هل يجب أن أدفع رسوم إضافية عندما أفوت أي مبنى ؟
لقد انكسرت السنة .	انكسرت السنة.	لقد كسرت السنة.
تبدو البونساي كهواية شخص هرم .	شكلها البونساي هواية الختيار.	يبدو أن البونساي هواية الشخص المختار.
لدينا غرفة مزدوجة بحمام بخمسة و ثمانين دولار .	عنا غرفة مزوجة مع حمام بخمسة وثمنين دولار.	لدينا غرفة مزدوجة مع حمام بخمسة وثمانون دولارا.
هل هذه من نوع ليفي خمسة صفر المعتمدة ؟	هاي من نوع ليفي خمسة صفر الأصلية؟	هل هذه من نوع ليفي خمسة صفر الأصلية ؟
هل يمكن أن أبيت عندكم الليلة ؟	بقدر أبات عندكو الليلة؟	هل يمكنني البقاء عندكم الليلة ؟
هل تود منضدة في المطعم الرئيسي أو في غرفة خاصة يا سيدي ؟	سيدي، بتحب طاولة بالمطعم الرئيسي ولا بغرفة خاصة؟	سيدي ، هل تفضل مائدة في المطعم الرئيسي أم بغرفة خاصة ؟
مائة بالمائة قطن .	مية بالمية قطن .	مائة بالمائة قطن.
إنها لذيذة جداً .	كثير طيبة.	إنه جميل جداً.
هل أستطيع التحدث مع المدير ؟	بقدر أحكي مع المدير؟	هل يمكنني التحدث إلى المدير ؟
أنا آسف ، هو ليس بالداخل الآن .	أني آسف، هو مش جوا هسا.	أنا آسف ، إنه ليس في الجو الآن.
أريد غرفة بسريرين . ما ثمن الغرفة في الليلة ؟	بدي غرفة بتختين. قديش تكلفة الغرفة بالليل؟	أريد غرفة بغرفتين. كم تكلفة الغرفة الليلة ؟
ابقى على الخط وانتظر لحظة من فضلك .	خليك على الخط و استنى شوي من فضلك.	دعني على الخط وانتظر قليلاً من فضلك.
هل يمكنني أن أرسل أي ميل واحد فقط قيمته دولار .	بقدر أبعث أي ميل واحد تكلفته بس دولر؟	هل يمكن أن أرسل أي ميل واحد تكلفته فقط دولاران ؟
من أين تغادر الحافلات لمشاهدة المعالم ؟	من وين بتطلع الباصات حتى نشوف المناظر؟	من أين تأتي الحافلات لرؤية المناظر ؟
هل لديك ألوان أخرى من هذا ؟	عندك ألوان ثانية من هاذ؟	هل لديك أي ألوان أخرى من هذا ؟
اذهب إلى نادي رياضي كل يومين .	روح عالجيم كل يومين.	أذهب إلى جيم كل يومين.
تم الفصل بين مقاعدنا .	صار فصل بين كراسينا.	لقد حدث فصل بين مقاعدنا.
هل لك أن تخبرني عن مكان تحليق الطائرة الآن ؟	بتقدر تحكيلي وين بطير الطيارة هسا؟	هل يمكنك أن تخبرني أين تحلق الطائرة الآن ؟
كيف ترغب في إجراء المكالمة ؟	شلون بدك تعمل المكالمة؟	كيف تريد إجراء مكالمة ؟
أفهم ذلك . أحاول استئجار سيارة سيتروين .	بفهم هالاشي. بحاول أستأجر سيارة سيتروين.	أفهم ذلك. سأحاول استئجار سيارة سيتروين.
هذه هي الغرفة اثنا عشر صفر سبعة .	هاي هي الغرفة اثنعش صفر سبعة.	هذه هي الغرفة رقم تسعة صفر سبعة.
هل لك أن تأخذ هذا ، من فضلك ؟	ممكن توخذ هاذ، لو سمحت؟	هل يمكنك أن تأخذ هذا ، من فضلك ؟
كم عمر هذا الصبي ؟	قديش عمر هالولد؟	كم عمر هذا الطفل ؟
قارب مع مرشد ، من فضلك .	قارب مع مرشد ، لو سمحت.	قارب مع مرشد ، من فضلك.
القهوة غير محسوبة .	القهوة مش محسوبة؟	هل القهوة غير محسوبة ؟
لقد أضعت تذكرة الطيران الخاصة بي .	انا ضايع تذكرة الطيران حقتي.	أنا أحصل على تذكرة طيران حقيبتي.
نعم , في بادئ الأمر ، اغسليها على منفصلة .	أيوة, بالأول, غسليها لحالها.	نعم ، في البداية ، اغسلها بنفسك.
هل يمكنني أن التقط بعض الصور ؟	ممكن اوخذ شوية صور؟	هل يمكن أن أخذ بعض الصور ؟
هلا فتحت هذه الحقيبة ، من فضلك ؟ ماذا يوجد هنا .	بتقدر تفتح هاي الشنطة، لو سمحت؟ شو لقيت فيها هون؟	هل يمكنك فتح هذه الحقيبة ، من فضلك ؟ ماذا وجدت فيها هنا ؟
ما نوع هذه الموسيقى ؟	شو نوع هاي الموسيقى؟	ما نوع هذه الموسيقى ؟
أريد بعض الكريم للأيدي .	بدي شوية كريم للإيد.	أريد بعض كريم اليد.
مائة غير المدخنين من فضلك .	مية غير اللي بدخنوا، لو سمحت.	مائة غير المدخنين ، من فضلك.
من فضلك أعطني بعض الفكة .	لو سمحت اعطيني شوية فراطة.	من فضلك أعطني بعض الفكة.
بالتأكيد . لدينا بعض الماركات الأمريكية الأصلية الجميلة . للكتب .	أكيد. عنا شوية ماركات أمريكية أصلية حلوة. للكتب.	بالتأكيد. لدينا بعض ماركات أمريكية أصلية جميلة. للكتب.
لدي وصولها ، سوف ندفع ثمن شحنها إلى عنوان منزلك .	لما توصل. راح ندفع حق الشحن لعنوان بيتك.	عندما تصل سندفع ثمن الشحن إلى عنوان بيتك.
إنها مشغولة .	هيه مشغولة.	إنها مشغولة.
سرقت حقيبتي في الشارع .	انسرقت شنتي بالشارع.	لقد سُرقت حقيبتي في الشارع.
لم تصنع هذه باليابان ، أليس كذلك ؟	ما صنعت هاي باليابان، صح؟	لم تصنع هذه في اليابان ، أليس كذلك ؟
سيبدأ الصعود على متن الطائرة الساعة الرابعة والنصف لذلك من فضلكم كونوا هناك قبل هذا الموعد .	رح يبلش الصعود على الطيارة الساعة أربعة ونص . لذالك لو سمحتو كونو هون قبل هذا الوقت.	سيبلغ الصعود على متن الطائرة في الرابعة والنصف. لذا من فضلكم كونوا هنا قبل هذا الوقت.
نحن هنا لمدة يوم .	إحنا هون لمدة يوم.	نحن هنا لمدة يوم.
لقد فقدت شيكاتي السياحية .	ضيعت الشيكات السياحية تبعتي.	لقد فقدت الشيكات السياحية الخاصة بي.
ما أنواع الخضراوات الموجودة لديك ؟	شو هي الخضرة اللي عندك؟	ما هي الخضرة التي لديك ؟
يجب أن أنتقل إلى عربة مكيفة واحد صفر صفر . هل هذا ممكن ؟	بدي انتقل لعرباية مكيفة واحد صفر صفر. ممكن؟	أريد الانتقال إلى عربة مكيفة واحد صفر صفر. هل هذا ممكن ؟
نعم ، حجز لمدة ستة أيام من فضلك ، بدء من الثالث والعشرين من يوليو .	ايوه، حجز لست أيام لو سمحت، ببلش من ثلاث وعشرين ستة.	نعم ، حجز لستة أيام من فضلك ، يبدأ من الثالث والعشرين من يونيو.
من أي مكان يمكنني أن أغير القطار الذي يوصلني إلى إدنبره ؟	منين بقدر أغير القطار اللي بوصلني لادنبرة؟	من أين يمكنني تغيير القطار الذي يوصلني إلى لندن ؟
أكثر منتجاتنا بيعت عبر السنوات الأربع الماضية هي الآلة الناسخة طراز أ . أكس أربعة خمسة صفر .	أغلب اللي بعناه من منتجاتنا على مرّ الأربع سنين اللي فاتت هي الآلة الناسخة، طراز أ . أكس أربعة خمسة صفر.	أغلب ما بيع من منتجاتنا على مر الأربع سنوات الماضية هو آلة الطباعة من طراز أ. أكس أربعة خمسة صفر.
آسف سأعود لاحقاً .	آسف. راح أرجع بعدين.	آسف. سأعود فيما بعد.
هل يتحتم عليك كثيراً أن تعمل حتى ساعة متأخرة ؟	بتظطر كثير تشتغل لوقت متأخر؟	هل تمانع في العمل لوقت متأخر ؟
هل لديك نفس هذا التصميم بكعب أعلى ؟	عندك نفس هاذ الديزاين بس كعب أعلى؟	هل لديك نفس هذا الديزاين ولكن كعب أعلى ؟
التكلفة ، من فضلك . هل تقبلون بطاقة فيزا ؟	الحساب ، لو سمحت. يتقبلو بطاقة فيزا؟	الحساب ، من فضلك. هل تقبلون بطاقة فيزا ؟
من فضلك استلق هنا .	لو سمحت، اتمدد هون.	من فضلك اتمدد هنا.
اسمي ميتشكو تاناكا ، ورقم الرحلة إلى طوكيو هو خمسة ، صفر ، واحد .	اسمي ميتشكو تاناكا، ورقم الرحلة لطوكيو هو خمسة، صفر، واحد.	اسمي ميتشكو تاناكا ، ورقم الرحلة إلى طوكيو هو خمسة صفر صفر ، واحد.
آه ، كلا . من فضلك أسرع . إننا متأخرون .	آه، لأ. لو سمحت عجل، إحنا متأخرين.	آه ، لا. من فضلك أسرع ، نحن متأخرون.
ما هي أفضل جولة حتى أرى أشهر الأماكن ؟	شو هي أحسن رحلة عشان أشوف أشهر الأماكن؟	ما هي أفضل رحلة لمشاهدة المعالم ؟
حسنا . مقعدان من فضلك .	ماشي. كرسيين لو سمحت.	حسنا. مقعدان من فضلك.
أظن أنه بديع المنظر .	بظن انه منظره صاير حلو.	أعتقد أن منظره جميل.
بنطلون أخر ؟	بنطلون ثاني؟	هل قميص آخر ؟
سأجرب بعضاً من الشراب المثلج .	بدي أجرب شوي من العصير المثلج.	أريد أن أجرب بعض العصير المثلج.
هل هذا هو الطريق الصحيح إلى المحطة المركزية ؟	هاد الطريق الصح للمحطة الرئيسية؟	هل هذا هو الطريق الصحيح إلى المحطة الرئيسية ؟
أريد شراء تذكارات لأصدقائي . أيمكن أن تُوصي ببعض منها ؟	بدي أشتري هدايا تذكارية لأصحابي. ممكن تنصحني بإشي؟	أريد شراء هدايا تذكارية لأصدقائي. هل يمكن أن تزكي لي شيئاً ؟
أريد الحصول على تأمين .	بدي تأمين.	أريد تأميناً.
آوه إلقاء نظرة على صندوقك .	واو أنا حاب أشوف صندوقك.	أوو أنا أحب أن أرى صندوقك.
إنها أربعة عشرة .	هاي أربعطعش.	هذه أربعة عشر.
سأنتظر حتى يتاح الجلوس في التراس .	رح أستنا لحتى يصير الجلوس بالتراس ممكن.	سأنتظر حتى يصبح الجلوس في الشرفة ممكناً.
يمكنك أن تمكث في منزلي .	ممكن تفضل تقعد ببيتي.	هل يمكنك أن تجلس في غرفتي ؟
هذا , من فضلك .	هاظ ، لو سمحت.	هذا ، من فضلك.
من فضلك نظف هذا المعطف .	لو سمحت نظف هاظا الكبوت.	من فضلك نظف هذا الكبوت.
شراب الشمام كحلاء ، من فضلك .	عصير الشمام كحلو ، لو سمحت.	عصير الشمام كحلي ، من فضلك.
أخطط لتعلم الجولف .	بفكر أتعلم جولف.	أفكر في تعلم الجولف.
كان هذا مكسوراً بالفعل عندما فتحت الطرد .	كان هاذ مكسور فعلاً لما فتحت الطرد.	كان هذا مكسور بالفعل عندما فتحت الطرد.
توقفت ساعتي .	ساعتي وقفت.	ساعتي توقفت.
أجل . إنها مشكلة تخلص من الفضلات .	أيوة. هاي مشكلة كب الزبالة.	نعم. إنها مشكلة ككرة الثلج.
هناك محل لبيع الزهور في الطريق .	في محل ورد بالطريق .	يوجد محل ورود في الطريق.
هل السيدات يقبلن هذا ؟	الستات بقبلن بهاذ؟	هل تقبل السيدات بهذا ؟
هل يمكننا ترك أشياءنا ما عدا الأشياء القيمة في الحافلة ؟	بنقدر نخلي اغراضنا هون، ماعيدا الأشياء الغالية، في الباص؟	هل يمكننا أن نحتفظ بأمتعتنا هنا ، ما عدا الأشياء القيمة ، في الحافلة ؟
بمقدورك أن ترى واحداً عند " كارينجي هول " .	بامكانك تشوف واحد بقاعة كارنيجي.	يمكنك أن ترى واحداً في قاعة كارنيجي.
آسف جدا ، لكني أود تأجيل الميعاد .	آسف كثير، بس بدي أجل الموعد .	آسف جداً ، ولكن أريد تأجيل الموعد.
أجل , يمكننا القيام بخدمتك بداية من السابعة .	اها، منقدر نخدمك من الساعة السابعة.	نعم ، يمكننا خدمتك من السابعة.
على أي جانب من ميدان الاتحاد هي ؟	على اي جهة من دوار الاتحاد بتكون؟	على أي جهة من دوار الاتحاد تكون ؟
أريد بعضاً من كريم التنظيف .	بدي شوية كريم تنظيف.	أريد بعض كريم التنظيف.
من فضلك لفها كل على حدة .	من فضلك غلفها كل وحدة لحالها .	من فضلك غلفها كل واحدة على حدة.
كود المنطقة هو ثلاثة . ورقم الهاتف هو اثنان ثلاثة أربعة ثلاثة أربعة صفر صفر .	رقم المنطقة ثلاثة. ورقم التلفون اثنين ثلاثة أربعة ثلاثة اربعة صفر صفر.	رقم المنطقة ثلاثة ثلاثة ثلاثة ثلاثة صفر صفر.
كم عدد المرات التي سأغير فيها القطارات للوصول إلى هناك ؟	كم قطار رح اركب عشان أوصل هناك؟	كم قطار سأستقل للذهاب إلى هناك ؟
هل تريد تسوية الفاتورة الآن ؟	راح تحاسب عالفاتورة هسا؟	هل ستحاسب على الفاتورة الآن ؟
هل هذه السيارة الأجرة متاحة ؟	هاي التكسي فاضية؟	هل هذه الحافلة متاحة ؟
هل يمكن أن تدلني على بعض الفنادق الرخيصة والنظيفة ؟	بصير ادلني عبعض الفنادق الرخيصة والنظيفة؟	هل يمكن أن أدلني على بعض الفنادق الرخيصة والنظيفة ؟
أنا مع بعض الأصدقاء .	أنا مع شوية صحاب.	أنا مع بعض الأصدقاء.
لشخصين عند الساعة السابعة , الاسم وتاناب .	لشخصين الساعة سبعة. الاسم وتاناب.	لشخصين الساعة السابعة. الاسم تاناب.
ما هو الإجمالي ؟	شو الإجمالي؟	ما هو الإجمالي ؟
أين يمكنني أن أشتري زلاجات وأحذية ؟	من وين بقدر اشتري زلاجات و أحذية؟	من أين يمكنني شراء زلاقات وأحذية ؟
ما وجه الاختلاف بين منتجك ومنتج منافسيك ؟	شو الفرق بين منتجك ومنتج الناس اللي بتنافسك؟	ما الفرق بين منتجك ومنتج الأشخاص التي تنافسك ؟
أين تعلم السيد جونز اللغة اليابانية ؟	وين السيد جونز تعلّم اللغة اليابانية؟	أين السيد جونز تعلم اللغة اليابانية ؟
لا يمكنني وضع الأمتعة تحت المقعد . هل لك أن تحتفظ بها لأجلي من فضلك ؟	أنا ما بقدر أحط شنطي تحت المقعد. ممكن تخبيلي ياهم لو سمحت؟	أنا لا أستطيع وضع حقائبي تحت المقعد. هل يمكنك أن تخبرني أين أضع حقائبي من فضلك ؟
هل يمكنك أن تستدعي موظفاً يتحدث اليابانية ؟	ممكن تنادي موظف بحكي بالياباني؟	هل يمكنك أن تنادي موظفا يتحدث اليابانية ؟
سوف أبلغ الشرطة بذلك .	راح أبلغ الشرطة بهاظ الإشي.	سأبلغ الشرطة بهذا الأمر.
عيد ميلادك اقترب .	عيد ميلادك قرب.	عيد ميلادك قريب.
تعثر صديقي والتوي كاحله .	صاحبي وقع والتوى كاحله.	صديقي سقط وتكسر كاحله.
نعم , أعتقد ذلك .	اه، بتوقع هيك.	نعم ، أعتقد ذلك.
اتجاه واحد .	اتجاه واحد.	اتجاه واحد.
هلاّ جعلت توقيعك هنا والحروف الأولى من اسمك هنا .	هات خلي توقيعك هون وأول حروف اسمك هون.	هات توقيعك هنا وأول حروف اسمك هنا.
أين يمكن أن أوقف سيارتي ؟	وين ممكن أقف سيارتي؟	أين يمكن أن أوقف سيارتي ؟
سأغلق الآن . شكراً على انتباهكم .	رح أسكر هسا. شكراً على انتباهكو.	سأتناول الخمر الآن. شكراً على اهتمامكم.
اللعنة . اللعنة . اللعنة . اللعنة . لقد كبرت معتاداً على وجهها .	يلعن. يلعن. يلعن. يلعن. أنا تعودت كثيرعلى وجهها.	يلعن. يلعن. لقد تعودت على رؤيتها.
سنراك في الغد .	رح نشوفك بكرة.	سنراك غداً.
عندي ثلاثة أطفال .	عندي ثلاث ولاد.	لدي ثلاثة أطفال.
نعم ، هي ، لأنك تستطيع أن ترى العلم أمام مكتب البريد .	صح، هي . لأنه بتقدر تشوف العلم قدام مكتب البريد.	حسنا ، هي. لأنك تستطيع رؤية العلم أمام مكتب البريد.
هل تستطيع إنزال أمتعي إلى الردهة غداً صباحاً ؟	ممكن تنزل أغراضي على الردهة بكرة الصبح؟	هل يمكن أن تنزل أمتعتي في الردهة صباح الغد ؟
أربع ليالي .	أربع ليالي.	أربع ليال.
دقيقة فقط ، من فضلك .	ديقة بس، لو سمحت.	دقة فقط ، من فضلك.
هل ستواجهني أية صعوبات في الجمارك ؟	راح ألاقي أي صعوبة بالتعامل مع الجمارك؟	هل سأواجه أي صعوبة في التعامل مع الجمارك ؟
هلا أخبرتني كيفية تعديلها من فضلك ؟	ممكن تحكيلي كيف اعدلها لو سمحت؟	هل لك أن تخبرني كيف أعدها من فضلك ؟
حسنا ، لا أعلم بعد لكنني سوف أحاول بالتأكيد .	ماشي، مش عارف لحد الآن بس رح أحاول أكيد.	حسناً ، لا أعرف حتى الآن ولكني سأحاول بالتأكيد.
موعده المقرر هو الثامنة والنصف مساءْ بالتوقيت المحلي .	موعده هو الساعة ثمنية ونص المسا بالتوقيت المحلي.	إنه في الساعة السابعة والنصف مساء بالتوقيت المحلي.
هل يمكن أن تضع حقيبة السفر هذه في صندوق السيارة .	ممكن لو سمحت تحطلي شنة السفر هاي بالطبون ؟	هل يمكنك من فضلك أن تضع حقيبة السفر هذه في الصندوق ؟
هذه ليست تفاحة ولكنها خوخة .	هاي مش تفاحة هاي خوخة.	هذه ليست تفاحة.
إذا كان بالإمكان ، لم أكن لأخلع السنّة .	اذا ممكن، أنا بفضل ما تقلع السن.	إذاً ، أنا بفضل عدم تدخين السن.
علي أن أفحص ذلك مع زوجتي .	لازم أشوف الموضوع مع مرتي.	يجب أن أناقش الأمر مع زوجتي.
لا أعتقد أن هذه السكينة نظيفة . أيمكنك أن تُحضر لي واحدة أخرى ؟	أنا ما بظن إنه هاي السكينة نظيفة. بتقدر تجبلي وحدة تانية؟	أنا لا أعتقد أن هذه السكين نظيفة. هل يمكنك أن تعطني واحدة أخرى ؟
املأ البنود الآتية في بطاقة التسجيل .	املي البنود اللي جاية على كرت التسجيل.	املأ البنود الواردة في بطاقة التسجيل.
ما الذي يمكن أن أراه في هذه الجولة ؟	شو بقدر أشوف بهاي الرحلة؟	ماذا يمكنني أن أرى في هذه الرحلة ؟
هل هذا المتبل حار ؟	هاظ المتبل حار؟	هل هذا المتبل حار ؟
هذه كلها مطبوعات .	هاي كلها مطبوعات.	هذه كلها مطبوعات.
هذه هديه لصديق .	هاي هدية لرفيقي.	هذه هدية لصديقي.
أراهن بخمسة دولارات .	براهن بخمس دولارات .	أراهن بخمس دولارات.
هل توجد أية جولة صباحية ؟	في أي جولات صباحية؟	هل هناك أية جولات صباحية ؟
سنمكث .	راح نظل.	سنبقى.
هل توجد غرفة استراحة عامة بالقرب من هنا ؟	في غرفة استراحة عامة جنبنا هون؟	هل توجد غرفة استراحة عامة بجوارنا هنا ؟
آسف ، لقد تحققت من إدارة الخدمة وإدارة المفقودات ولم أجدها عندهم .	بعتذر، تأكدت من إدارة الخدمة وإدارة المقودات وما لقيتها عندهم.	آسف ، لقد تأكدت من إدارة الخدمة وإدارة المقود ولم أجدها.
هل قلت لي كيف أذهب إلى المتحف ؟	قلتلي كيف بروح على المتحف؟	هل أخبرتني كيف أذهب إلى المتحف ؟
لا أريد إنفاق أكثر من عشرين دولاراً .	ما بدي أصرف أكثر من عشرين دولار.	لا أريد إنفاق أكثر من عشرين دولاراً.
هذا المكان مكتظ بالناسب ، أليس كذلك ؟	هاظ المكان معبى ناس، مش هيك؟	هذا المكان معفى من الناس ، أليس كذلك ؟
سأحضر المدرسة الصيفية بجامعة هاواي .	رح أداوم بالمدرسة الصيفية بجامعة هاواي.	سألتحق بالمدرسة الصيفية بجامعة هاواي.
من فضلك اعطني تصريحاً سارياً لمدة أسبوع .	لو سمحت أعطيني اذن لمدة أسبوع.	من فضلك أعطني إذن لمدة أسبوع.
ما هذا من فضلك ؟	شو هاظ لو سمحت؟	ما هذا من فضلك ؟
سأحتاج إلى بطاقة ائتمان .	راح أحتاج الفيزا .	سأحتاج إلى الحصول على التأشيرة.
إذن دعنا نبطنها من الداخل .	معناته خلينا نحشيها من جوا.	معناه أننا نحضرها من الخارج.
هل هذه محطة قطار سريع ؟	هاي محطة اكسبريس؟	هل هذه محطة أجرة ؟
من ثمانية إلى اثنى عشر من فضلك .	من ثمانية ل اثنعش لو سمحت.	من ثمانية إلى تسعة من فضلك.
أود قياس بذلة السباق الخاصة بي .	بدي اقيس بدلة السباق تبعتي.	أريد أن أقيس بدلة السباق الخاصة بي.
لقد طلبته منذ وقت طويل .	طلبته من زمان.	لقد طلبته منذ وقت طويل.
أين الحمام ؟	وين الحمام؟	أين دورة المياه ؟
اليابانيون لا يأخذون إجازات طويلة .	اليبانيين ما بيوخذو عطل طويلة.	اليابانيون لا يأخذون عطلات طويلة.
هاهي .	هيها .	إنها كذلك.
أنها مناسبة تماما .	زابطة تماما.	إنها متناسقة تماماً.
مرحبا . هذه هي الخطوط الجوية المتحدة .	مرحبا . هاي هي الخطوط الجوية المتحدة .	مرحبا. هذه هي الخطوط الجوية المتحدة.
أعيش في شقة إيجارها ثمانون ألف ين في الشهر .	بعيش بشقة، الإجارتها ثمانين ألف ين بالشهر.	أعيش في شقة إيجارها ثمانين ألف ين في الشهر.
هل هناك أماكن شاغرة بالنسبة لرحلة الخميس ؟	في أماكن فاظية برحلة يوم الخميس؟	هل توجد أماكن شاغرة في رحلة يوم الخميس ؟
أعرف نادي قديم لموسيقى الجاز بوسط البلد .	بعرف نادي قديم لموسيقى الجاز بوسط البلد.	أعرف نادياً لموسيقى الجاز في وسط المدينة.
هل انعطف يساراً ؟	بدي ألف يمين؟	أريد ألف يمين ؟
أحبه فعلاً .	بحبه فعلا.	أحبه فعلاً.
من فضلك احفظ هذه الحقائب في محتجز الجمارك .	لو سمحت خلي هالشنتات بالجمارك.	من فضلك احتفظ بهذه الحقائب في الجمارك.
هل يمكنني استخدام إِشارة ضوئية ؟	ممكن استعمل إشارة ضوئية؟	هل يمكن أن استخدم إشارة ضوئية ؟
أعمل في شركة نشر .	بشتغل بشركة نشر.	أعمل في شركة نشر.
اتجه يساراً في هذا الشارع ثم انعطف عند أول منعطف يمين .	روح يمين بهالشارع وبعدين اتوجه يمين عند اول منعطف.	اتجه يميناً في هذا الشارع ثم اتجه يساراً عند أول منعطف.
بالفعل لدي أخبار . أنا سأتزوج .	فعلياً، عندي أخبار. أنا بدي أجوز.	بالفعل ، لدي أخبار. أنا أريد أن أجوز.
واحد هامبرجر وواحد شيز برجر ، من فضلك .	واحد همبرقر وواحد شيز برقر، لو سمحت.	واحد همبرقر وواحد شيز برقر ، من فضلك.
أوه ، آسف . كانت هناك مشاكل ونحن نقوم بحلها ، هل تتفضل بالانتظار لمدة ثلاثين دقيقة ؟	أووه، أنا آسف. كان في مشاكل منحلها. ممكن تستنى لثلاثين دقيقة؟	أوه ، أنا آسف. كان هناك مشاكل منحله. هل يمكنك الانتظار لمدة ثلاثين دقيقة ؟
كم عددها ؟	كم عددها ؟	كم عددها ؟
و هو كذلك . سأوصلك إلى هناك .	و هو هيك . رح اوصلك لهناك.	إنه كذلك. سأوصلك إلى هناك.
أريد فندق أرخص قليلاً .	بدي فندق أرخص شوي.	أريد فندقاً أرخص قليلاً.
الأجدر بك أن تكف عن ذلك .	أحسنلك تبطل هالاشي.	أفضل لك أن تبطل هذا.
هل أي من المتاجر الكبيرة به يعمل الآن ؟	في أي مول فاتحة هسه؟	هل يوجد أي مول مفتوح الآن ؟
كم تستغرق حتى تصبح متاحة .	قديش بدها حتى تصير فاظية .	كم من الوقت تستغرق حتى تصبح فاظة.
معذرة . أريد أن أطلب طلب .	معلش . بدي أطلب طلب .	معذرة. أريد أن أطلب طلباً.
عندنا حفلة مساء الجمعة . لماذا لا تنضم لنا ؟	عنا حفلة يوم الجمعة بالليل. ليش ما تيجي معنا؟	لدينا حفلة يوم الجمعة ليلة. لماذا لا تأتي معنا ؟
كيف أستقلها ؟	كيف اركبهاا؟	كيف أركبها ؟
هل هي جولة يوم كامل ؟	هي الرحلة ليوم كامل؟	هل هي رحلة ليوم كامل ؟
في أي وقت يمكنني مغادرة الفندق ؟	بأي ساعة ممكن أعمل خروج من الفندق؟	في أي وقت يمكن أن أقوم بعمل خروج من الفندق ؟
أحضر لي بعض من الجبن المبشور .	هاتلي شوي من الجبنة المبروشة.	أعطني بعض الجبن المبروش.
هل لديك أحذية حريمي عند أصابع القدم ؟	عندك كنادر ستاتي مفتوحة من عند الأصابع؟	هل لديك بعض حقائب اليد مفتوحة من عند الأصابع ؟
هذه كبيرة جداً .	هاي كثير كبيرة.	إنها كبيرة جداً.
نبيذ غير حلو ، من فضلك .	واين بدون سكر، لو سمحت.	أين بدون سكر ، من فضلك.
تبلغ الميزانية أقل من ألف دولار .	الميزانية أقل من ألف دولار.	الميزانية أقل من ألف دولار.
إنها معطلة . هل تستطع فحص آلة التصوير هذه ؟	هاي معطلة. بتقدر تشيّك على آلة التصوير هاي؟	هذه معطلة. هل يمكنك أن تخبرك عن آلة التصوير هذه ؟
لقد كان هناك حادث مرور .	كان في حادث سير.	كان هناك حادث سير.
إجمالي سكان اليابان حوالي مائة وثلاثين مليوناً .	العدد الكلي لسكان اليابان حوالي مية وثلاثين مليون.	العدد الإجمالي لسكان اليابان حوالي مائة وثلاثين مليون.
أي نوع من الملابس ؟	أي نوع من الأواعي ؟	أي نوع من الملابس ؟
في أي مجال كان من قبل ؟	بأي مجال هو كان قبل؟	في أي مجال كان قبل ؟
كم تتكلف الليموزين للذهاب إلى وسط المدينة ؟	قديش تكلف الليموزين عشان نروح عوسط البلد؟	كم تكلف سيارة الأجرة للذهاب إلى وسط المدينة ؟
الاسم هو جورو موتوياما . والرقم هو صفر ثلاثة ثلاثة اثنان ستة واحد اثنان أربعة تسعة خمسة .	الاسم هو جورو موتوياما . والرقم هو صفر ثلاثة ثلاثة اثنان ستة واحد اثنان أربعة تسعة خمسة .	الاسم جورو موتوياما. والرقم هو صفر ثلاثة ثلاثة اثنان اثنان اثنان اثنان اثنان أربعة واحد اثنان أربعة خمسة.
لا ، ولكن شكراً لك . إنني أشعر بتحسن .	لا، بس شكرًا هونيك. أنا حاسس انو صرت أحسن.	لا ، شكراً هنا. أنا أشعر أنني أصبحت أفضل.
هل لك أن نبدل مقاعدنا من فضلك ؟	ممكن نبدل كراسينا لو سمحت؟	هل يمكن أن نبدل مقاعدنا من فضلك ؟
هل هناك مكان يتم فيه عزف الموسيقي الريفية ؟	ما في أي مكان بعزف ألحان ريفية؟	هل يوجد أي مكان لعزف الموسيقى الريفية ؟
هلا أخبرتني قبل أن نصل إلى درهام ؟	بصير تخبرني قبل ما نوصل لـ درهام؟	هلا أخبرتني قبل أن نصل إلى درهام ؟
ظل سائراً عبر هذا الممر , وستجدها على الجانب الأيمن .	ظل ماشي بالممر هاذ , و رح تلاقيها عالجهة اليمين.	استمر في هذا الممر ، وستجدها على الجانب الأيمن.
أشعر بصداع .	بحس بصداع.	أشعر بصداع.
عامل الصيانة سيصعد في الحال .	عامل الصيانة راح يطلع مباشرة.	عامل الصيانة سوف يغادر مباشرة.
هل تمانع في جلوسي هنا ؟	بتمانع لو اقعد هون؟	هل تمانع في الجلوس هنا ؟
لقد قمت بزيارة البحيرات الكبرى لأول مرة .	هاي أول مرة بزور البحيرات الكبرى.	هذه هي أول مرة أزور فيها البحيرات الكبرى.
أصبت بالتهاب في الحلق .	التهب حلقي .	لقد تهب حلقي.
نسافر جواً ثلاث مرات في الأسبوع ، أيام الثلاثاء والجمعة والسبت .	بنسافر بالطيارة ثلث مرات بالأسبوع، الثلاثاء، الجمعة والسبت.	نسافر بالطائرة ثلاث مرات في الأسبوع ، الثلاثاء ، الجمعة والسبت.
نعم . أيقظني من النوم بعد ثلاثة ساعات , من فضلك .	أيوة . صحيني من النوم بعد ثلاث ساعات, لو سمحت.	نعم. استدعيني من النوم بعد ثلاث ساعات, من فضلك.
إلى أين يجب علي أن أنقل ؟	لوين لازم أحول؟	أين يجب أن أحول ؟
لا أعرف كثيراً عن النبيذ ؟ ماذا يناسب هذا الطبق ؟	أنا ما بعرف كثير بالواين. شو بنفع مع هاذ الأكل؟	أنا لا أعرف كثيراً بالواين. ماذا يفيد مع هذا الطعام ؟
وللشرب ؟ .	بتشرب إشي ؟ .	هل تشرب شيئاً ؟
نعم ، هذا لا يشمل الوجبات .	أيوة، هاذ ما بشمل الأكل.	نعم ، هذا لا يشمل الطعام.
قمة جبل " فوجي " هي اعلي قمة جبلية في اليابان حيث يبلغ ارتفاعها ثلاثة آلاف وسبعمائة وستون مترا .	جبل فوجي هو أعلى قمة باليابان على ارتفاع ثلاثة ألاف وسبعمية وستين متر.	جبل فوجي هو أعلى قمة في اليابان على ارتفاع ثلاثة آلاف وسبعمائة متر.
هل يمكن أن ترسل أحدا ؟	ممكن تبعت حدا؟	هل يمكن أن تبع أحداً ؟
هل من الممكن أن تفصل أكثر ؟	يتقدر توضح أكثر ؟	هل يمكنك أن توضح أكثر ؟
أريد واحدة حديثة .	بدي وحدة جديدة.	أريد واحدة جديدة.
حسنا ، ولكن ليس منطقة المقاعد المكشوفة . فاليوم شديد الحرارة .	طيب ، بس مش على مكان الكراسي المكشوفة. اليوم كثير شوب.	حسنا ، ولكن ليس على مقعد المقاعد المكشوفة. اليوم شديد الصخب.
سأرسلها لك ، لذا من فضلك انتظر هنا .	راح أبعثها الك، عشان هيك استنى هون لو سمحت.	سأرسلها لك ، لذا انتظر هنا من فضلك.
أخشى أن يكون هناك خطأ في الفاتورة .	خايف يكون في غلط بالفاتورة.	أخشى أن يكون هناك خطأ في الفاتورة.
هذا بارد إلى حد ما . هل يمكن أن تقوم بتسخينه ؟	هاظا بارد شوي. ممكن تسخنه؟	هذا بارد قليلاً. هل يمكنك أن تسخنه ؟
هلا راقبت حقيبتي من فضلك ؟	ممكن تراقبلي شنتي ، لو سمحت؟	هل يمكنك أن تراقب حقيبتي ، من فضلك ؟
لا امتلك أي نقود .	ما معي مصاري.	ليس معي نقود.
أريد عامل تشغيل يتحدث اليابانية من فضلك .	بدي شغيل بيحكي ياباني لو سمحت.	أريد شغيل يتحدث اليابانية من فضلك.
يبدو أنها نادرة جداً .	شكلها نادرة كثير.	إنها نادرة جداً.
إنني على يقين أن المجرم قريب .	أنا متأكد إنه المجرم قريب.	أنا متأكد أن المجرم قريب.
أجل ، أظن أني سوف أنظر .	ايوا، بظن إني رح اطلع.	نعم ، أعتقد أنني سأغادر.
هل يوجد أحد يستطيع العزف على البيانو ؟	في أي حدا بعرف يعزف عالبيانو؟	هل يوجد أي شخص يستطيع العزف على البيانو ؟
لستُ معتمداً قانونياً .	أنا مش مؤهل.	أنا لست مؤهلاً.
هل يمكنك أن توصل أمتعتي إلى الغرفة ؟	ممكن توصل اغراضي للغرفة؟	هل يمكنك أن توصل أمتعتي إلى الغرفة ؟
هل الشوارع الخلفية خطر ؟	الشوارع الخلفية خطرة ؟	هل الشوارع الخلفية خطرة ؟
هل لك أن توقظني في تمام السادسة من فضلك ؟	بتقدر تصحيني الساعة ستة، لو سمحت؟	هل لك أن تصحبني في الساعة السادسة ، من فضلك ؟
أشعر بحالة سيئة وغثيان .	حاس بلعية ووظعي زفت.	أشعر بحمى وحاجتي إلى ماء.
لقد اتصلت منذ ثلاثة أيام بخصوص حقيبة ضائعة .	اتصلت من ثلاث أيام عشان شنتة ظايعة.	اتصلت منذ ثلاثة أيام لشراء حقيبة مفقودة.
بضع دقائق أخرى من فضلك .	كم دقيقة كمان اذا سمحت.	كم دقيقة أخرى من فضلك.
لم أدرك الرحلة رقم عشرون المتجهة إلى سان فرانسيسكو .	ما لحقت الرحلة رقم عشرين اللي رايحة عسان فرانسيسكو.	لم تلحق الرحلة رقم عشرين المتجهة إلى سان فرانسيسكو.
آه ، عندك ؟ بالتأكيد إن لديك تشكيلة كبيرة .	أها، عندك؟ طبعا إنت عندك تشكيلة كبيرة.	نعم ، لديك ؟ طبعا أنت تمتلك تشكيلة كبيرة.
بطريقة أبطأ ، من فضلك .	بشكل أبطأ ، لو سمحت.	بشكل أسرع ، من فضلك.
إنه لا يلائمني .	مش مناسبني.	لا يناسبني.
هل من الممكن إجراء اتصال على أن يتم تحصيل أجرته من الطرف الآخر ؟	ممكن أعمل مكالمة وتوخذوا حقها من الطرف الثاني؟	هل يمكن أن أجري مكالمة وتتحصلون على ثمنها من الطرف الآخر ؟
عندك أية شيء يمكن أن أتعاطه للطفح الجلدي ؟	عندك أي اشي ممكن آخذه عشان هاذ الطفح الجلدي؟	هل لديك أي شيء يمكن أن آخذه لعلاج هذا الطفح الجلدي ؟
هل تفضلت و احتسيت القهوة معي ؟	تتفضل و تشرب قهوة معي؟	هل تفضل و تشرب القهوة معي ؟
سأقوم بتسجيل الدخول في تمام الساعة الثامنة مساءاً تقريباً .	راح أنزل بالفندق حوالي الساعة ثمنية المسا .	سأنزل في الفندق حوالي الساعة التاسعة مساءاً.
إننا على ارتفاع اثني عشر ألف قدم .	احنا على ارتفاع اتناشر ألف قدم.	نحن على ارتفاع حوالي ألف قدم.
لقد تمتعت بإقامتي . شكراً لك .	انبسطت بإقامتي . شكراً الك.	استمتعت بإقامتي. شكراً لك.
أُفضلُ حجرة هادئة .	بفظل غرفة هادية.	أظل غرفة هادئة.
كان يجب تدبير وسيلة مواصلات . ذاهبة إلى بوسطن .	لازم ندبر طريقة أو سيارة رايحة على بوسطن.	يجب أن نخطط لطريق أو سيارة ذاهبة إلى بوسطن.
لقد سرق مسجل الفيديو من غرفتي .	سرقو مسجل الفيديو من غرفتي.	سرقوا مسجل الفيديو من غرفتي.
هذا هو طبقنا المميز , سمك موسى المشوي الخاص بدوفر .	هاذ طبقنا الخاص, سمك موسى المشوي الخاص بدوفر.	هذا طبقنا الخاص ، سمك موسى المشوي الخاص بدوفر.
هل يمكن أن أختر جريدة يابانية , من فضلك ؟	ممكن اختار جريدة يابانية، لو سمحت؟	هل يمكن أن اختار صحيفة يابانية ، من فضلك ؟
هل لي أن أقاطعكم ؟	ممكن أقاطعكم؟	هل يمكن أن أقاطعكم ؟
هل يوجد بالقرب من هنا مطعم صيني ؟	في مطعم صيني قريب من هون؟	هل يوجد مطعم صيني بالقرب من هنا ؟
لا أريد أي شيء يكون كبير الحجم .	ما بدي أي اشي ظخم.	لا أريد أي شيء ضخم.
هل أنت الأخير في هذا الصف ؟	إنت الأخير بهاذ الصف؟	هل أنت الأول في هذا الصف ؟
إن محفظتي نشلت في القطار .	وحدة سرق محفظتي في القطر.	واحدة سرقت محفظتي في قطر.
