# Supplementary material for: Exploring prompting for dialectical machine translation: a focus on north Jordanian Arabic
Source: PeerJ journal article supplement (doi:10.7717/peerj-cs.3209), 2025-11-12
Supplement: IrbidDial2k.xlsx [file IrbidDial2k.xlsx]

## Sheet: Sheet1
sentID.BTEC	Irbid Dialect
5	هناك ، قدام بيانات السايح بالزبط .
9	ما سمعت بهاذ المكان قبل هيك بالمنطقة هون .
11	كمل مشي بهاذ الطرق لعند ما تلاقي صيدلية .
26	بقديش الفطور ؟
27	كيف بقدر اساعدك ؟
30	روح يسار من عند الدخلة الثالثة .
50	بتحب تحط كريمة و سكر مع قهوتك ؟
64	بتقدروا تصرفولي الشيك أبو الميتين دولر تاعي؟
74	اذا صار هيك ، لو سمحت رنلي .
86	وين الكوفي شوب ؟
87	بدي جاكيت للصغار .
91	طيب. بتكلف خمسة وثمانين دولر بالبريد العادي وثلاث دولرات بالتوصيل الخاص.
120	كنت رح اشتريه لو كنت محلك .
129	عندك كنادر ستاتي مفتوحة من عند الأصابع؟
130	راح ألاقي أي صعوبة بالتعامل مع الجمارك؟
140	لا. ممكن أقترح إني أوخذ غرفة بس لاستخدام فردي ؟ عنا وحدة.
143	بدي أعمل شعري كيرلي ، لو سمحت.
145	هي بدها بيرا .
157	صباح الخير . شلونك .
158	أسف أني بحاجة إني أشوف اثبات هوية.
169	أي نوع من الأواعي ؟
170	هاظا بارد شوي. ممكن تسخنه؟
173	آسف، هاذ المكان محجوز فعلاً.
176	أنا تمام، بس عندك مانع أرن عصاحبي؟
177	شكراً ، هاظ بكفي.
184	مين أحسن صاحب عندك ؟
187	يوم الصحة الرياضية بعشرة عشرة بكون عطلة وطنية عملوه عشان يرفعوا مستوى الصحة عند الناس.
192	بدك ياني أفحص ماتور السيارة؟
206	ممكن تساعدني ألاقي شنتيتي؟
221	بدك تعمل الترتيبات قبل؟
238	بتساعدني ، شكراً الك.
261	لما توصل هناك، اسأل حدا ثاني، لو سمحت.
280	حاب أمدد اربعة وعشرين، لو سمحت.
285	تفظل هي دولرين. خلي الباقي إلك.
315	واحد همبرقر وواحد شيز برقر، لو سمحت.
319	قديش بتوخذ عشان تطبع صور الفلم؟
320	إحنا كل واحد بدو يدفع عن أكلته.
326	المكان كان عكرسي باللوبي.
333	لو سمحت اصرفلي هظول من ين لقنيه.
346	بدي قاموس بنحط بالجيبة ، لو سمحت.
360	لشخصين الساعة سبعة. الاسم وتاناب.
368	ساعتي. كانت الكترونية من سيكو.
370	بسعدنا إنه نقدملك العصير اللي بتختاره وبيلحقه الغدا . منوفر قائمة كاملة من الشراب في هاي الرحلة موجودة بقسم المعلومات تاع مجلتنا.
373	انت عايش قريب من هون؟
375	وين محل الهدايا؟
386	أني عالطريق العام بجنب خليج موروا.
391	بدي منبه، لو سمحت.
398	بالمناسبة، اسمي هيروشي ايجيما.
401	هاذ القطار بوقف عند بحيرة الغابة. مش هيك؟
408	أغلب اليبانيين بوكلوا الخطبوط والحبار .
416	ممكن أحجز تذكرتين لشيكاغو من الدرجة الثانية، لو سمحت؟
419	أني رحت على نيويورك.
423	شو رقم رحلة الطيران؟
442	واحد لنيويورك، إذا سمحت.
446	لكم يوم بس.
447	الثاني عالشمال .
471	هاذ الكرت ، طيب؟
488	هاظ مكتب الاستقبال؟ في عيادة قريبة من هون؟
493	بكفي عشر دولرات للروحة بالتكسي؟
503	طعمه غريب.
512	طيب. استنى، راح أجيبلك وحدة.
516	نص قنينة ، لو سمحت.
540	مش هيك. بس إشي مش غالي.
548	إنت بدّور على اشي؟
551	أربع ليالي.
553	بدي شوية جرابات رجالي.
565	بتقدر ترخصها لأنه في عليها شوية بقع؟
571	في حدا خبط فيّ . وبعدها لاحظت أنه جزداني انسرق.
599	أنا مش متأكد اذا جهزت وعية بتكفيني لرحلة مدتها ثلاث أيام.
612	طيب، انا بدي أجرب العرق .
631	اذا حدا سأل عني، قله اني رح أكون بالكوفي شوب.
632	أنا متأكد انه حطيتها بالجيبة الداخلية للكبوت.
641	ممكن تعطيني اسم ورقم الجهة اللي بدك تتصل فيها؟
643	رح تدفعلي شركة الطيران عشان أشتري شوية أشياء شخصية ضرورية؟
650	بدي غرفة بحمام.
652	ما طلع من الماكينة إشي.
667	كان المفروض تسافر بالطيارة رقم ثمنية عشرين ، اللي طلعت من خمسطعشر دقيقة. على العموم. أني بقدر أرتبلك رحلة ثانية.
673	في حد فتح الطرد تبعي.
679	أووه، شغلة بسيطة. انت هون، على كل حال.
680	شركة الخطوط الجوية اليابانية، رحلة الطيران رقم واحد اثنين ثلاثة.
681	أنا بدي أشتري شامبو.
683	بتقدر تحكيلي أميت رح نوصل على مجمع الخدمات العامة .
688	وين أقرب لحام؟
703	إحنا حابين نظل أربع ليالي من واحد ثمنية.
708	شو اسم هاي الوردة؟
719	خمسطعش تسعة هو يوم احترام المسنين.
723	فيش صابون بغرفتي .
741	عندك أي اشي ممكن آخذه عشان هاذ الطفح الجلدي؟
742	بتقدر تغير الصيغة مثل ما قلت هسا؟
761	قديش بدك يعني عشان تطلب؟
773	ما بقدر اعمل هيك , بس رح احطها بالشنتة الك .
777	قديش بدها حتى تصير فاظية .
786	وين الاستعلامات الرياضة؟
787	هاذ الحجم ، اللي بتسميه حجم عادي، راح تلاقيه هون .
793	وين راح تخلص الرحلة، و أميت؟
848	منين بقدر أغير القطار اللي بوصلني لادنبرة؟
855	أني بدي أحط هاظ بصندوق أمانات يكون آمن.
859	وين بقدر أصرف مصاريي؟
897	بنقدر نخلي اغراضنا هون، ماعيدا الأشياء الغالية، في الباص؟
902	أني مستغرب ليش كل هاي الرسوم الزيادة عفاتورتي.
917	أناي رح أدفع خمسين دولر.
941	هسا عرفت . شو اللي كان غلط . ؟
957	أكيدا يلي بتحكي. عندي حجز طاولة عالساعة ستة و ثلث المسا. بس آسفة لإني رح أوصل متأخرة نص ساعة.
1003	كم وقية من العطر بقدر أوخذها بدون رسوم ؟
1007	بس للسياحة.
1010	هاذ تمام، لو سمحت وقعهم. كيف بتحبها تكون؟
1023	ظل في عندكم محلات لعرض الليلة؟
1036	أني بدي وحدة كبيرة.
1037	نمت و ما صحيت ع منبه الساعة ستة ونص.
1038	أني مصور حر.
1047	السمسارين بقدروا يصرفولك الدولرات عشان بخشيش الكازينو. بصير نروح؟
1056	عنا حوالي ثلاثين نوع من زيوت الحمام.
1062	بدي اجهزلك العرض الاسبوع الجاي.
1074	شكراً الك. قديش سعر هاي الكفوف؟
1098	أني لازم أروح. رح أحكي معك بعدين.
1100	بدي حفاظات للاستعمال مرة وحدة.
1122	من وين جاية سمكات الفراش هاي؟
1124	ممكن تحولي اياهم لدولارات، لو سمحت؟
1139	إحنا كثير محظوظين. في عندهم وحدة مقاسها أربعة بمحل ألاموانا.
1146	في سيارة ليموزين؟
1163	ممكن ترنلي مكالمة تصحيني فيها الساعة خمسة ونص بكرا الصبح؟
1165	بفظل غرفة هادية.
1167	بدي أسيتون للمناكير.
1183	بدي بطارية.
1193	في فرقة موسيقية ولا ديجيه؟
1194	بقدر أستأجر شغلة للتنفس خلال السباحة؟
1199	أنا بدي أحجز غرفة لمدة أربع ليالي من اثنين وعشرين إثنعش.
1212	هاي الشنتة بتناسب كل حالات الجو؟
1213	بدي كوكيز لو سمحت.
1218	بدي استأجر سلاح أوتوماتيك ليومين.
1224	ما لحقت الرحلة رقم عشرين اللي رايحة عسان فرانسيسكو.
1234	قديش رح أدفع حتى اوصل للمطار؟
1235	هيك تمام. متى رح يكون؟
1276	قديش عمر بنتك؟
1312	بصير ادلني عبعض الفنادق الرخيصة والنظيفة؟
1321	بنقدر نحجزلك غرفة مريحة بقلعة قديمة قريبة من نادي جولف مشهور.
1329	أني بنصحك بهاذ لأنه مصنوع من مواد طبيعية مية بالمية.
1361	بوقف القطار عند برايتون؟
1369	بتقدر تحكيلي من وين بلاقي تكسي؟
1375	تذكرتين من الدرجة الثانية لو سمحت.
1384	بدي أبعث فاكس.
1394	بدي مكوى للسفر.
1396	بقدر أضيفك أي اشي؟
1404	بخاف اسأل، بس شو قصدك؟
1418	بدي الشخص اللي بعمل الوثائق اللي بحجم الورق العادي بدون ما يظطر يثنيهم.
1433	اه ، بس مش قوي كثير.
1434	أني بتحسس كثير من البسس.
1436	اه، لازم يكون عندك رخصة سواقة، ولازم يكون توخذ رخصة من لجنة التكسي و ليموزين.
1462	كمل يا سيدي .
1465	شكله مش قادر يجيب ميّة ساخنة.
1474	بدي أحجز غرفة لهاي الليلة.
1492	لا، هي ما بتشمل الضريبة ومصاريف الخدمة.
1506	بتحب تيجي معي نتسوق بعد الظهر؟
1508	مرحبا ، هاذا فعلا فسطان حلو.
1519	حاليا، مكالمتك رجعت. تفضل لو سمحت.
1525	شو رقم البوابة؟
1539	شو هو التذكار الخاص بهاواي؟
1556	بقدر أروح هناك بالمترو؟
1560	بدي سشوار.
1562	راح نظل نحكي هيك وين ما نروح؟
1585	أني من النرويج.
1603	من ثمانية ل اثنعش لو سمحت.
1619	أكيد. خليني أشوفها . بظن المرجان جرحك.
1620	بس للاحتياط، أعطيني رقم الشخص المسؤول.
1622	في طريق فرعي؟
1630	ليش ما اجى على الحفلة امبارح؟
1637	كان في حادث سير.
1650	آسف، أني اتصلت بالرقم الغلط.
1653	لو سمحت دخّل رقم هويتك .
1663	مش قادر أزبط الصورة.
1668	واحد تشيز برقر وعصير بردقان ، لو سمحت.
1670	هاك جواز السفر تاعي.
1682	ليش، شكراً كثير الك. بقدر اطلع للقمة؟
1702	بقدر أوخذ تذكرتين للحفلة الموسيقية الجمعة الجاي؟
1718	في راكب ثاني هناك قال انه بقدروا يبدلوا الكراسي معك.
1754	بقدر أمدد إقامتي؟
1766	أخوي، بتعرف أي مكان محرز الشوفة قريب من هون؟
1768	لا، بدي استأجر نص مجموعة من المضارب وجوز بواط.
1782	ممكن تخبرني بس تلاقوا الشنتة الضايعة؟
1788	شو اسم هاي المحمية؟
1791	أني انشخطت.
1792	وين في مكان كويس حتى نشوف الاماكن المهمة؟
1800	ممكن تجيبلي شوية فواكة؟
1834	ممكن أوكل هسا؟
1837	بدي أصرف هاي الدولرات.
1867	بدي تكسي. أني بساوث ماين ، وليبرتي.
1876	أكيد، بدك اياه كيرلي دايما؟
1878	هاي مش تفاحة هاي خوخة.
1903	راح أعطيك الوصفة . خظها عالصيدلية.
1927	بنسافر بالطيارة ثلث مرات بالأسبوع، الثلاثاء، الجمعة والسبت.
1931	هاظا سعره غالي، صح؟
1948	اه موجود عنا. رح نجهزلك اياه.
1950	ممكن تخلولي شنتاتي عندك للساعة ثلاثة؟
1951	لا، أني بس بدي ازوره بدون موعد.
1954	بقدر احجز سيارة للأجار هون؟
1968	إنت أمريكي؟
1980	لهاظ المكان، لو سمحت.
1985	خربت سيارتي .
1988	وين الآي شدو؟
1993	بدنا زاوية هادية، اذا ممكن.
1997	هاي التكسي فاضية؟
1998	هاي محطة اكسبريس؟
2001	متى لازم آجي ؟
2003	بدي دورقة صغيرة من العرق.
2005	ممم. ممكن أخد وجبتي بعدين؟ حاسس حالي مش على بعضي هسا.
2025	فعلياً، عندي أخبار. أنا بدي أجوز.
2033	بنطلون ثاني؟
2035	بقدر آخذ برنامج؟
2052	في حدا اقتحم غرفتي مبارح بالليل.
2055	ورجيني السمكة اللي شفتها اليوم بألبوم الصور، لو سمحت.
2083	شوف التعليمات اللي على علبة الأكل الفاضية.
2086	بدي مصاري ورق.
2100	سرق جزداني وركظ بعيد.
2119	ما عندك كورسات تجريبية؟
2147	من وين بقدر أشتري طوابع بريد؟
2148	أني من بريطانيا الكبيرة.
2156	لازم أشوف الموضوع مع مرتي.
2161	أنا بدي اوخد تعويض عن هاظ.
2179	في كشك تليفون قدام هاذ البنك.
2180	راح أوصل بتسعة ثلاث وراح أروّح بأربعطعش.
2205	هاذ غالي شوي، مش شايف هيك؟
2235	عندك كعب؟
2236	وين اخر موقف للباص؟
2238	بدك حلويات؟
2302	إنت بتسولف؟
2306	ونفس الشي إلي ، لو سمحت.
2318	طلبي ما وصل.
2324	في كثير ينابيع حارة.
2329	لو سمحت اصرف الخمسين ألف ين لدولر أمريكي.
2338	هاذ تمام بالنسبة إلي . بصراحة أني بحب أدخن.
2347	من وين بقدر اشتري زلاجات و أحذية؟
2353	نسيت عصيرنا؟
2368	ممكن توديها على عنواني باليابان عن طريق صفحة الطرود الدولي و توخذ حقه من هناك ؟
2381	بدي كاسة واين إحمر.
2389	بس اذا كانت ملكك ، يا سيدي . ههههههه، هاي مزحة صغيرة.
2401	أكيد. كيف منقدر نخدمك؟
2412	عنا بيرا، ويسكي، براندي، جن، فوديكا وواين.
2425	تحقيق شخصية. آه ، جواز السفر بنفع؟
2428	رقم غرفتي هو ثلاثة ستة وعشرين. بصير توخذ الغسيل؟
2440	راح أشوف اذا في اشي منهن بناسبني.
2441	بدي هيتر .
2445	هاتلي شوي من الجبنة المبروشة.
2462	ممكن ألاقي قمصاني نظيفات بكرا الصبح؟
2476	ممكن تخليه يرجع يتصل علي بعدين؟
2490	ليش لعاد؟
2492	عفواً . في مكتبة بتبيع كتب قريب من هون ؟
2496	بظن إنك غلطت. الغرفة حاسبت عنها قبل. معي وصل.
2505	الباص هناك .
2516	بدي لفتين أيزو مية، فلم ملون، ستة وثلاثين لقطة ، لو سمحت.
2519	بدي أصرف هاذ الشيك بقيمة سبعين دولر.
2521	بدي أشتري طوابع لعشر رسائل لليابان، لو سمحت.
2528	في بنوك قريبة من المحطة؟
2531	خايف يكون في غلط بالفاتورة.
2552	هو صحيح هون.
2557	واحد تشيز برقر عشان أروح، لو سمحت.
2578	بطلت تقدر تعمل تصميم بدون كمبيوتر من هون و طالع.
2591	أركض.
2601	في مزع ببلوزتي. بدي اسألك اذا بتقدر تخيطلي اياه، لو سمحت؟
2613	قديش الأجرة لمانشستر؟
2643	ممكن تعيرني وصلة كهربا؟
2644	من وين بقدر أشتري درج للشط؟
2670	لعاد، لو سمحت أعطيني حجز جديد.
2676	أعطييني قطعة لحمة الخنزير هاي، بس ما تكون سميكة مثل هذيك.
2678	رح نيجي الساعة سبعة.
2687	لما أشوف الأسعار بهالرخص ، بحس أنه مسخرة الواحد يشتري أي شي باليابان.
2690	انسرقت ملفاتي، كمان.
2695	قمع بوزة على فانيلا، لو سمحت.
2702	أنا موافق. لازم تصير طبيعة كثير.
2704	لاحظ الفتحة، لاحظ الفتحة ، بعدين قرب الابواب، لو سمحت.
2707	راح أحتاج الفيزا .
2708	تفظل الرقم.
2715	احكيلي عن مكان كويس لهاظا النهر، لو سمحت.
2726	لو سمحت أعطيني تقرير للحادث.
2729	لا، شكراً الك حالياً.
2734	طيب ، خليك معي على الخط. السيد ناكاجيما ، الست سايتو شكلها ما بترد على المكالمة. بدك أرن عليها لمدة أطول شوي؟
2736	ممكن، بس لازم ندرس كل واحد لحال.
2747	شكلها نادرة كثير.
2748	وين استلام شناتي الرحلة رقم سبعة صفر ثلاثة؟
2760	اشي غلط بشنتك .
2765	هاذ رح يخرب؟
2772	لا، شكراً. احسنلي ما أشرب اكثر من هيك.
2808	لو سمحت احكيلي عن شوية شوارع مليحة للتسوق.
2811	هاذ الباص بروح لفندق الهيلتون؟
2816	هسا، هاي اللوحة كثير مميزة. رسمها تسوروتارو كاتاأوكا. معروف هاذ فنان عالمي.
2850	كثير بقدر الموسيقى الكلاسيكية.
2851	بقدر اعزمك على العشا برا يوماً ما؟
2862	ماشي . شو اسم شريكك ورقمه، لو سمحت.
2871	عفوا. خليني أطلع، لو سمحت.
2878	ممكن تنادي موظف بحكي بالياباني؟
2898	إحنا منزور قرايبنا كثير كثير .
2939	ميكي هاياكاوا. هاي غرفة رقم سبعة صفر اثنين.
2945	لازم أظل هون الليلة، مش هيك؟ بتقدر تساعدني أحجز غرفة بفندق؟
2947	المفروض ما يطول. خمسطعشر دقيقة غالباً.
2960	بتقدر تحكيلي تكلفة هاي المكالمة؟
2964	طيب، بتقدر تحكيلها اني اتصلت، لو سمحت؟ راح أتصل فيها مرة ثانية بعدين.
2973	في أي جولات صباحية؟
2982	إنت بتصرف عملات أجنبية؟
2983	ميزانيتنا كلها حوالي خمسين دولار لثلاث أشخاص.
2990	من وين بقدر أشتري شريط أو فلم تصوير؟
2995	عندك بيرا يابانية؟
3001	بدي بدلة سباحة مقاسها صغير، لو سمحت.
3016	بدي أسجل شنطي.
3029	هاي الست كاوازو بالغرفة سطعش إحدعش.
3030	يا مرحبا فيك.
3038	ما في منهم.
3040	شو هو الأهم للشعب الياباني ، ليلة راس السنة ولا عيد الكريسماس؟
3041	رقم مقعدك اثنين وثلاتين أ. بعدين، امشي دغري لاخر هاد الممر. المقعد اللي عندالشباك.
3073	لحظة لو سمحت.
3109	لو سمحت كمّل البيانات الناقصة في التقرير.
3111	ما بفهم الإنجليزي الأمريكي، أنا بحكي بالانجليزي الراقي.
3120	من مبارح.
3129	بتشمل تأمين ظد التصادم والدين.
3134	ضيعت بطاقة الاستلام تبعي.
3152	عندك بروشات شكلها حلو؟
3155	أنا بحكي معك من كشك عام بماسي.
3170	هاي كثير كبيرة.
3176	كم تكلفة الصفة لكل ساعة؟
3179	سيداتي وسادتي،برحلتنا اليوم، عنا مضيفين بحكوا ياباني بتعرفوهم من الباجة اللي لابسينها. إذا بتعرف إنه أي حد بحتاج مساعدة بالترجمة، لو سمحت خلينا نعرف.
3182	في أي فترة معينة بالفن إنت بتفضلها؟
3185	لو سمحت اتأكد منها مرة ثانية.
3195	إمشي دغري على طول النهر حوالي نص ميل. بتصل المنتزه.
3201	لا، هظول كثير قويات.
3207	اوك، راح أبعثها إلك على لاس فيجاس.
3209	بدور عقميص للركض.
3220	بتحب تشرب إشي من البار؟
3222	هاذ الطريق لو سمحت. أخدذ هاذ السلم.
3238	الأفضل إنك تطلع بقطار الساعة ثمنية ونص.
3267	في سينيما قريبة من هون؟
3269	هسا موسم جمع المحار، عشان هيك بيكونو طيبين.
3279	بدي ساعة مستعملة.
3284	راح أنزل بالفندق حوالي الساعة ثمنية المسا .
3285	الوقت تأخر. لازم أروح.
3289	أني ما استخدمت خدمة الغسيل تبعتكم. بتقدر تتأكد مرة ثانية؟
3292	بدي شاي إذا بتسمح.
3295	لا، ما في.
3304	هاظا آخر موقف؟
3318	خلينا نرلنه.
3323	هاظ المتبل حار؟
3334	من وين ممكن اركب باص لحتى اتفرج ع المعالم؟
3335	اه، أنا بدي اشوف معالم المدينة.
3351	في كتير سواح حوالين البناية، شكلهم متجمعين عشان يشوفوا شو اللي بصير.
3359	شكراً الك على حسن الضيافة.
3375	الأمانة هي أحسن سياسة.
3385	بتقدر تصحيني الساعة ستة، لو سمحت؟
3392	قديش التكلفة لنص يوم؟
3397	أني كينجي.
3402	بتعرف أي أماكن حلوة نشوفها بشيكاغو؟
3404	طيب، اذا انتو الاثنين مصرين، أني راح اروح معكو.
3413	ممكن تبدل هاي بوحدة ثانية من نفس النوع، لو سمحت؟
3446	بدي أعمل حجز للساعة ثلاثة ونص الظهر.
3489	صندوق الأمانات ، لو سمحت.
3502	لو سمحت جيب واين مليح.
3512	بدي أي مكان صغير.
3522	مطلوب مني أدفع حق الغاز؟
3557	حرامي. امسكوه .
3562	احنا منستني صحابنا يجوا.
3572	لو سمحت أعطيني شوية فراطة.
3619	كيرلي عطول مشدود، لو سمحت.
3628	هي صغيرة الحجم و ذكية.
3638	شو عرض الأوبيرا اليوم؟
3640	مقلي، لو سمحت.
3644	غسيلي ما رجع لحد هسا.
3649	بالمناسبة، راح تكون فاضي السبت الجاي؟
3667	طيب، يعني ، ممكن نرتاح لبعض .
3669	عاملتني كإني شحاد.
3683	فاهم. ممكن تساعدني بهاي المشكلة الثانية كمان ؟
3685	ممكن تركبلي عدسات طبية على هاي النظارة الشمسية؟
3698	راح أوخد ثنتين من هاي.
3705	يا الله شو إنها كلاب ذكية . من أي فصيلة؟
3721	وقعت مني الشوكة. لو سمحت جبلي وحدة ثانية.
3742	كان هاذا بسلي.
3747	أكيد. امشي دغري ولف يمين من الدخلة الثالثة. راح تلاقيه على يمينك.
3765	عندك فلم شفاف ملون؟
3780	بتعرف كاثي؟ هاي حفلة عيد ميلادها.
3789	عندك لوحة ملونة؟
3792	بقدر أدفع عن طريق شيكات سياحية؟
3806	بس ، هو، يا زلمة كيف بدي أعرف أنه هاظ الإشي حقيقي؟
3825	بقدر اشتريها معفية من الضرايب؟
3829	أنا ما بقدر أحط شنطي تحت المقعد. ممكن تخبيلي ياهم لو سمحت؟
3835	ممكن لو سمحت تحطلي شنة السفر هاي بالطبون ؟
3847	أنا طالع هسا، لهيك راح أوخذها.
3856	لو سمحت ودي حدا للطابق الفوقاني عشان يوخذ شناتيي الساعة ستة ونص.
3858	بدي خريطة لسان فرانسيسكو والمنطقة اللي حويلاها.
3859	شو نوع الخبز اللي عندكو؟
3860	وين الأصنصير؟
3861	في أي حدا بعرف يعزف عالبيانو؟
3872	بأي موقف لازم انزل عشان أروح على عمارة امباير ستيت؟
3887	الميزانية أقل من ألف دولار.
3892	شكراً ، بس ما بتوقع أنه معي وقت عشان أظل ليلتين. ممكن تحجزلي غرفة مزدوجة في الفندق لليلة اثنعش ثلاث بس؟
3900	بصير أحجز غرفة بتختين بطل على البحر؟
3920	بعدنا ما قررنا .
3928	صاحبي وقع والتوى كاحله.
3936	بدي أجرب شوي من العصير المثلج.
3961	في مطعم تايلندي قريب من هون؟
3972	جنب العمارة الطويلة. لهيك ارجع مرة ثانية من نفس الطريق اللي اجيت منه لعند ما تلاقي الاشارة. وبعدها روح يسار.
3974	لازم ألحق طيارة لوس أنجلوس بكرا الصبح بكير.
3988	يعني بنصحك عالأكيد ب برج مدينة سان فراسيسكو. رح يعطيك لمحة عن سان فرانسيسكو.
3991	بدي تأمين.
3995	خلينا نستخدم كمادة باردة عشان يخف الوجع.
4013	هي بدها تشتري فسطان.
4016	كم أجرة التكسي لعند الفندق؟
4017	وين الحمام؟
4034	بدفع أي مصاري إذا فتت على هاي العمارة؟
4036	اعملها بطريقتك.
4082	أني بدور على اشي لايق.
4104	الشباك محشور بالزواية.
4109	على اي جهة من دوار الاتحاد بتكون؟
4119	نص أوقية من شانيل رقم خمسة، لو سمحت.
4129	شو رأيك بكاس قهوة؟
4143	بحتاج تذكرة؟
4182	قديش بتكلف الخدمة تقريبا؟
4185	قديش بوخذ وقت من هون؟
4187	كريمة وسكر؟
4193	في أي تخفيظات للأعظاء المشاركين؟
4219	في قطار سريع الساعة تسعة ونص؟
4221	خليني أشيك على زيت البريكات و الماتور. ماتور سيارتك شكله بآخر أنفاسه.
4224	ما كان غلطي.
4262	ما في كهربا.
4263	راح أبلغ الشرطة بهاظ الإشي.
4269	بده يحاسب كل واحد منا عطلبه لحال؟
4275	بأي مكان من ثلاثين لخمسين دولار لليلة.
4278	لو سمحت صلح هاذا.
4284	بايام السنة الجديدة .و مناسبات خاصة مثل حفلات الأعراس و توزيع الجوائز أو العزا.
4285	كثرلي ماسترد، لو سمحت.
4305	ليش ما تعطيها هدية؟
4321	أي فلم بتنصحني فيه؟
4324	هاك عشرين دولر وأعطيني صرافة دولرين ، لو سمحت.
4326	معنى حكيك إنك بتنقدني .
4335	ممكن آجي على الساعة ثنتين.
4341	هي هاي شناتي الرحلة صفر واحد؟
4346	هاي رحلتي الأولى لباريس.
4348	ممكن تقدر قديش بكلف قبل ما تبدا شغل فيه؟
4358	تعال، لو سمحت.
4364	رحلة التخييم تبعتنا لازم تكون مرتبة.
4365	متى بدنا نركب القارب؟
4373	ما عنا شنتة توسع كل هاي الكمية عشان هيك راح أحطها بهاي الشنتة البلاستيك الكبيرة .
4374	بدي ألعب تنس.
4375	في عصير أناناس و برتقال و بندورة.
4377	الجهة اليسار من هاذ الطابق جنب الاصنصير.
4382	شو راح ينعزف بقاعة الحفلات الموسيقية اليوم؟
4409	شو رأيك نشوف فيلم ثاني؟
4418	لو سمحت اصرفلي هاد الشك السياحي كاش.
4432	لو سمحت ، بدي آخذ نفس الدورة بكرا.
4450	يمكن أعطيك جواب أحسن من هاذ بعد ما أشوفه مرتين.
4451	بدي هدية لمناسبة الذكرى السنوية.
4464	شو في مسرحيات موسيقية معروضة هسا؟
4475	عندك مراية؟
4478	معلش ، بس ضيعت طريقي. ممكن تساعدني؟
4479	راح آخذ هاظ ، لو سمحت.
4497	ما بتقدر تجيب ألعاب نارية على كندا.
4501	قديش مرتك طباخة ممتازة.
4503	بدك أي مساعدة؟
4505	ممكن تحجزلي تكسي الساعة ستة الصبح لبكرا ، لو سمحت؟
4510	شو بتحب مع الطبق الرئيسي؟
4540	في بوتيك قريب من هون؟
4549	هاظ المكان معبى ناس، مش هيك؟
4558	عفوا. رح تكون جاهزة خلال خمس دقايق.
4588	صارت رقبتي توجعني وأنا نايم.
4594	نعم، ما في مشكلة. ممكن أشوف جواز سفرك؟
4615	ما معي مصاري.
4624	أي وقت لازم أكون بالمحطة؟
4630	في كثير مطاعم بالمنطقة.
4635	جنب غرفة الأمانات.
4640	إنسريت بالحكي معك.
4644	في لفة بعد الظهر؟
4648	أني مع صحابي.
4653	انبسطت بإقامتي . شكراً الك.
4654	الشط تحت على اليمين. شو المنظر بجنن.
4658	شكراً لإنك استنيتي، آنسة مكجوير. هيو هون. وقعي لو سمحتي.
4662	عندك اي صورة للهوية؟
4671	سبعة، لو سمحت.
4674	بدي أودي هاذ للمغسلة. متى بكون جاهز؟
4685	شلحت البنطلون.
4699	اه، في شناتي لحدا ثاني وصلت غرفتي هسا.لو سمحت، ممكن تشوفها؟
4714	يتقدر توضح أكثر ؟
4729	ارتحت بالنومة؟
4733	ممكن تكبس كبسة الشباك؟
4740	مفتاحين لو سمحت.
4742	بدي لمبة.
4744	بنهاية الممر.
4773	بدي شوية ورق رسائل.
4788	راح نروح بالباص؟
4790	قلت إنك رايح على طوكيو بكرا؟
4795	خليني نايم للساعة تسعة.
4801	بدي انتقل لعرباية مكيفة واحد صفر صفر. ممكن؟
4813	كيف اللعب معك هاي الايام؟
4814	حاس بخنقة بصدري.
4826	ما في مشكلة. اذا اجيت بخمسة تسعة ، بتقدر تستمتع بالفلم العلمي لأنه احنا عنا يوم مميز مفتوح بأول جمعة من كل شهر.
4828	عندك أي رحلة ثانية؟
4836	ماشي ، خصم خمسة بالمية. بمشي معك؟
4845	أناي رايح على باريس.
4848	هاي مش أحدث موديل ، صح؟
4857	موعده هو الساعة ثمنية ونص المسا بالتوقيت المحلي.
4889	بين هاظ المبنى معنا، لو سمحت.
4894	طيب. بدي سلطانية حجم وسط وكرات الرز.
4901	كيف شكله؟
4924	بدي أشوف هاذ الموجود بالواجهة، لو سمحت.
4945	مستحيل. احنا بإجازة. أنا ما بدي أقعد بغرفة بالفندق اشوف البيسبول بالتلفزيون. بدي أروح أحظر مسرحية.
4957	بقدر ألمسه؟
4974	ممكن تيجي هون عشان اتصلحه؟
4983	بدي شوية ألياف اصطناعية.
4985	اسمي " تارو تاناكا " عندي حجز من قبل.
4990	بدي شوية كريم تنظيف.
5004	بدي جاكيت كم طويل.
5009	انسرقت شنتتي.
5017	تقابلنا بالصدفة عدة مرات ، مش هيك؟
5035	ممكن أشوف المنيو مرة ثانية؟
5045	بعده مبين عليهم علامات المرض و وجوهم شاحب.
5082	كم عددها ؟
5083	فراولة، لو سمحت.
5090	جبل فوجي هو أعلى قمة باليابان على ارتفاع ثلاثة ألاف وسبعمية وستين متر.
5091	لا، بعده ، في كثير عشان تنقي منه
5098	بدي كريم ليلي للبشرة.
5104	موجودة بين المخبز والملحمة.
5116	ممكن تقصر الكمام؟
5117	خايف ما يكون في دورة لتعليم الجولف
5121	ممكن تفرجيني الخاتم الثاني يلي من جهة اليسار؟
5124	بتقدر تحكيله يتصل فيّ؟
5138	جربت أعمل مكالمة دولية. زبطت معك قبل هيك؟
5148	هاظ غلط.
5175	صح، هي . لأنه بتقدر تشوف العلم قدام مكتب البريد.
5207	أكيد راح تبعتثم، صح؟
5219	بدي أعمل مكالمة عن طريق الفيزا.
5224	بدي اللي بخصني مشان أروح.
5245	لما توصل. راح ندفع حق الشحن لعنوان بيتك.
5246	هاي الأيام ، أنا بستخدم الكمبيوتر دايماً بالشغل.
5250	أووه، طيب. فهمت. راح آجي عندك.
5259	لا، هاذ بكفي.
5261	ممكن آخذ حرام و مخدة ؟
5262	بتقدر تيجي هون بأسرع وقت، لو سمحت؟
5263	فنجان قهوة، لو سمحت.
5267	بدور على كروت لمنظر بتبين طبيعة جزر هاواي.
5272	ممكن تظيقلي الخصر كم صانتي؟
5289	أني بنفس العمر.
5300	ممكن تجبلي قهوة؟
5307	ثلاثمية وخمسين دولار؟ هاظا أعلى من ميزانيتي.
5323	هل احنا محتاجين نحط هاظ للتصويت؟ اذا لأ، بتوقع أنه وصلنا للنتيجة، بدي أبعثها لمجلس ادارتنا بكرا الصبح.
5334	بتعرف اذا في أي فنادق رخيصة؟
5361	صباح الخير. ارتحت بنومتك ؟
5364	شو بتخطط تعمل بعد ما تخلص مدرسة؟
5366	انسرقت شنتي بالشارع.
5367	في عندك أي خدمات ثانية غير فطور الصبح؟
5407	لو سمحت ، بدي فنجان قهوة بالحليب.
5410	وهو هيك . فندق الشيراتون قريب من هناك؟
5411	بتمنى ما تكون كثير تعبان.
5431	بدي استأجر سيارة من هاذ الموديل لمدة يومين.
5436	راح آخذ صورة لجاك دانيلز.
5437	بدي كيس بوشار، لو سمحت.
5447	وقعت مني عصاية من عصي التزلج.
5455	إحنا ما منجيب أي هدايا عالحفلة، بدال هيك الضيوف بجيبو مصاري.
5458	حاب أبعثه عن طريق البريد.
5492	وصلت الطيارة متأخرة عشان الثلج كان كثيف.
5518	الفاتورة لو سمحت.
5521	لو سمحت بتقدر تستقبل رسالة؟
5540	عفواً، مش قادر أتبع معك. ممكن تحكي ابطأ شوي، لو سمحت؟
5549	شو بقدر أورجيك؟
5559	ممكن اوخذ شوية صور؟
5570	من مية.
5584	رقم الرحلة الجوية إتش بي تسعة و ثمانين رايحة لطوكيو في احدعش ثلاث.
5585	بقدر آخذ صحن ثاني مثل هاذ؟
5594	عندك واحدة ثانية؟
5596	لو سمحت جبلي فطوري على غرفتي بكرا الساعة سبعة الصبح.
5615	عامل الصيانة راح يطلع مباشرة.
5617	آسف. راح أرجع بعدين.
5640	كيف اركبهاا؟
5648	في أماكن فاظية برحلة يوم الخميس؟
5657	عفواً. بتسمحلي أمر؟
5680	في عندك أي خضار أو فواكه؟
5684	لو سمحت قلي كيف أعبي بطاقة النزول للبر؟
5695	أنا بتوقع سيارتي بتسوى حوالي خمس الآف دولار.
5706	هاذ الأكل قليل الكالوريز؟
5717	أي باص لازم أوخذ عشان أروح على المحطة؟
5723	نعم، هيو. بس رح تظطر ادور يسار من عند الاشارة الثالثة وتظلك بنفس الشارع لعند ما توصل طريق ستة وستين.
5733	بدي كاسة مي عشان اوخذ الدوا، لو سمحت.
5761	راح أكون كثير ممنون لو توخذني لعند الشط.
5772	آسف. رنيت على الرقم الغلط. هاي وكالة تانكيوشا الصحفية.
5779	إحنا رح ندفع الحساب و نطلع.
5830	شو نوع هاي الموسيقى؟
5847	لو سمحت إعطي هاذ الدوا الشراب لابنك، مرة وحدة بعد كل وجبة.
5848	هاظ الموديل متوفر بمقاسات ثمنية وعشرين، و واحد و ثلاثين و خمسة و ثلاثين صانتي.
5875	أوه، شكله قرعة .
5898	بصير استعمل تلفونك؟
5902	ريحته حلوة. قديش سعره؟
5906	بدي أرجع اأكد على رحلتي الطيران لشيكاغو في سبعطعش الشهر.
5913	يعني كلت كثير .
5914	ممكن أحكي مع الآنسة براون؟
5916	هاد البيت مبين كثير مريح العيشة فيه، مش هيك؟
5934	بدي احجز على شركة نورث وست إيرلينز على الرحلة رقم صفر ثمانية ستة بخمسة الشهر.
5940	محفظتي، جواز السفر وشغلات شخصية ثانية.
5956	متى بتسكرو؟
5974	استنى دقيقة. ممكن أكون تركته بغرفة الاستراحة.
5987	هاظ بالزبط اللي كنت بدي أحكيه.
5988	اه، بتوقع هيك.
5997	بيتك كبير. قديش عدد الغرف؟
6006	كيفنا عالعشا.
6024	فاهم، بس بقدر أقولها.
6047	ممم، اه، لو سمحت. أنا بس بتمنى ما يصيبهم دوار البحر.
6056	على طوكيو، لو سمحت.
6073	شو هو قت وصولنا المتوقع؟
6086	بدي اطلع بكرا الصبح، عشان هيك حاب أدفع هسا.
6100	واين بدون سكر، لو سمحت.
6109	مقعد ممنوع التدخين فيه ، لو سمحت.
6156	هو مشغول هسا.
6167	بقدروا الأجانب يستخدموا الكتب بالمكتبة؟
6179	ممكن أظل بغرفتي للساعة ثنتين المسا؟
6190	هههه. صباح الخير صار دورك. هو كويس.
6193	بدي فيلم رقم ايه إس ايه لهاي الكميرا، لو سمحت.
6205	وين رسمات مونيت؟
6214	هاي البيتزا زاكية. مين عملها؟
6221	شوطعم هاذ الأكل؟
6227	هذول كمان غاليين.
6228	متى راح يتحرك القطار الجاي على بوسطن؟
6232	بفكر أتعلم جولف.
6247	لو سمحت أعطيني عصير ثاني.
6253	راكب أمواج شاطر.
6272	خايف تكون الكمام كثير قصيرة.
6283	ممكن توريني كيف أحط الغاز؟
6285	أجار الفندق شاملة الفطور؟
6287	هاظ كل اشي؟
6291	هو بنهاية هاظا الطريق.
6339	لو سمحت شغل العداد.
6363	غرفتي أبرد من اللازم.
6411	راح أرجعلك بس تكون مش مشغول كثير.
6413	عندك واحد أكبر؟
6418	حاس بتحسن.
6430	إنت ملم بتظاريس اليابان؟
6436	لو سمحت ورجيني وين أنا موجود على هاي الخريطة.
6437	مية بالمية قطن .
6466	بدي أبدل لغرفة مطلة على البحر. في أي رسوم ثانية؟
6472	قديش بكلف استئجار سفينة لمدة نص يوم؟
6481	عشرة احدعش.
6484	بدي شريط للآلة كاتبة.
6492	كثير طيبة.
6497	أميت راح نقلع؟
6498	كيف بتخلي السايق يعرف إنك بدك تنزل؟
6513	أربعة وعشرين دولار. بدك كمان؟
6515	عملت الحجز بطوكيو من شهر.
6517	بشكرك من كل قلبي.
6525	أنزل من هون عمركز روكفيلر؟
6539	لو سمحت قيس حجم كندرتي.
6547	هاي روعة.
6550	بدك تحدد موعد لتطلع معي؟
6552	لو سمحت نظف هاظا الكبوت.
6553	بدي استأجر قارب سريع.
6574	وين قسم النسوان؟
6581	القهوة مش محسوبة؟
6593	بأي مجال هو كان قبل؟
6602	يلعن. يلعن. يلعن. يلعن. أنا تعودت كثيرعلى وجهها.
6609	لازم أدفع رسوم ثانية بس أفوت عأي مبنى؟
6613	اهلين ، اللي طلبته على الخط. يلا، لو سمحت.
6625	جرحي بوجعني.
6635	وين المحطة؟
6657	عندي قشعيرية.
6659	ثلاث أيام.
6660	اقطع الجسر لهناك، وراح تلاقي المكتبة على ايدك الشمال.
6692	لو سمحت ساعدني ألاقي دليل سياحي بحكي ياباني.
6699	ما بدي وحدة دفشة.
6700	راح يكون في تأخير بسيط.
6715	شو الفرق بين هاي الفنادق؟
6724	راح علي الموقف.
6736	كان مرتب . شكراً الك.
6740	راح أكون هناك حوالي الساعة ستة المسا.
6746	عندك أي اشي لوقت أطول شوي؟
6766	تاريخ انتهاء الصلاحية تسعطعش من شهر ثلاث التسعة وتسعين.
6780	كيف كانت؟
6800	في أي كازينوهات حلوة؟
6810	هايذ حق قلام الحبر. فاتورة بمية دولار.
6812	وين قسم النسوان؟
6825	من وين بقدر اطلع بالقارب؟
6832	صاحبي انصاب.
6835	شكلك منيح.
6836	راح يكون هاظ المحل فاتح بكرا؟
6862	على طول الطرق لآخر اللوبي.
6864	ممكن لو سمحت ترتبلي شواربي؟
6866	هاذ بيجي معه صحن سلطة ويا بطاطا مشوية يا محمرة.
6875	من وين بقدر اشتري بريق؟
6914	ما بقدر أبيع هاي بدون وصفة طبية.
6917	ممكن أحجز خمس مقاعد بنفس الصف؟
6923	ممكن تعيرني حبل القطار، لو سمحت؟
6944	أي سيارة سواقتها احسن؟
6960	ما رح توخد خصم قد ما حاولت .
6966	بتقدر تفتح هاي الشنطة، لو سمحت؟ شو لقيت فيها هون؟
6970	بدي أحكي تلفون لمسافة طويلة لعند فندق هيلتون في بوسطن.
6984	الستات بقبلن بهاذ؟
6991	انتبه ، السقف واطي.
6999	أنا مش قادر أشوف الشاشة مليح من هون. ممكن نبدل المقاعد شوي؟
7030	هاي أول مرة بزور البحيرات الكبرى.
7048	في اشي غلط بالمروحة هاذ.
7057	بدي دكتور.
7070	قديش المدة اللي عاشتها بإنجلترا؟
7081	متوقع من محب للابداع الفني مثلك راح ينبسط باللوحات الزيتية والموسيقى وعروض الموسيقى بالشوارع.
7098	قديش الساعة؟
7099	رح آخذ سندويشة هوت دوغ وكولا.
7104	هاظ هو مسؤول الربط الخارجي.
7123	بتقدر تشوف عمارة بيضا، صح؟ هو قبال هاي العمارة.
7130	من متى؟
7137	ما عندي أي اشي عشان أعلنه.
7198	شو؟ عليك ضرايب بس يكون عندك أكثر من ثلاث قناني كحول؟
7206	صاحبي كثير مريض. ممكن تطلب الدكتور، لو سمحت؟
7227	أنا ما بعرف كثير بالواين. شو بنفع مع هاذ الأكل؟
7233	بتقدر تتصل في الصبح بكير، لو سمحت؟
7248	في محطة غاز على بعد حارتين من هون.
7253	اليبانيين ما بيوخذو عطل طويلة.
7264	حاسك بتسرح فيه. لهاي الدرجة قليل تشوف واحد ياباني؟
7269	طبعاً لأ. ليش بتحكي لعاد؟
7270	اي طريق بودي لمكتب البريد المركزي؟
7274	وين مجمع باصات جرايهاوند بهاي المدينة؟
7281	مش المطاعم اليابانية في كيوتو غالية؟
7289	بتوقع أنه شوي عالي بالنسبة الي.
7291	عنا غرفة مزوجة مع حمام بخمسة وثمنين دولار.
7305	بدي سعر الكتاب.
7314	الجو أبرد من المعتاد هاي السنة ، بس مش باردة كفاية لحتى تثلج.
7321	من وين بقدر أشتري تذكرة للمترو؟
7335	راح آخد مقاعد درجة رجال الأعمال، صح؟
7343	كم اجار التكسي من الفندق للمجمع؟
7349	ممكن آخذ هاي وهاي ، إذا تكرمت؟
7381	بقولوا أنه اليابان بلد غني.
7386	ظل في أي غرف فاظية بعرباية النوم؟
7391	بتقدر تنزلها لعشرين دولار، لو سمحت؟
7395	هاي هدية لرفيقي.
7412	التلج بخلي الطريق يزحلق.
7414	ما قدرت الاقي الكميرا تبعتي.
7416	بدي اعمل سندويشتين من لحمة فخدة الخنزير.
7438	عندك أي اشي عشان تعلنله؟
7439	شفت كبوت ازرق؟ حطيته على هاد الكرسي.
7470	في محل ورد بالطريق .
7478	أني من طوكيو.
7479	بدي غسول مشان اشيل كريم ريفلون.
7485	عندي شوية وعية للغسيل.
7507	طلبته من زمان.
7533	ممكن لو سمحت تبعتلي شغيل على غرفتي الساعة ستة الصبح؟
7549	بدي آخذ هوت شوكليت.
7550	ممكن نرتب معك عشان تنظيف غرفكم.
7574	خاص من فظلك.
7583	قديش بتكلف الروحة لفندق سي؟
7612	ممكن أوخذ بطاقة ذكية؟
7622	بدي أحجز طاولة لشخصين الساعة سبعة، لو سمحت.
7626	بدي كريم ليلي.
7627	ممكن تلفلي هاي كهدية؟
7636	الساعة ثلاثة وربع.
7650	رح أبعث فواتير حاجاتي اليومية، عشان هيك لو سمحت أعطيني عنوان واسم الشخص المسؤول.
7656	صعب علينا نحكي انجليزي بطلاقة.
7662	عندك نفس هاذ الديزاين بس كعب أعلى؟
7663	بدي جاكيت لولد عمره عشر سنين.
7671	وديني على شارع أباي، لو سمحت.
7684	شكراً الك. مرحبا، شكراً لأنك استنيت.
7693	أنا متأكد أنه إلي حجز.
7708	راح أبعثها الك، عشان هيك استنى هون لو سمحت.
7712	إحنا هون لمدة يوم.
7721	حاس بصداع خفيف.
7736	كثير استمتعت بالوجبة.
7756	لا، لو سمحت اقعد واستنى. راح أرجعلك بعد شوي.
7761	ممكن أشوف السيارة؟
7767	ممكن ترسملي خريطة، لو سمحت؟
7789	طيب، إستاذ. لو سمحت خليك بغرفتك لعند ما يجي الدكتور.
7811	انسرقت على شط وايمانالو. لو سمحت تعال هسا.
7812	شو رأيك بمية دولار؟
7814	بدي هاظا مليان.
7831	بدي أقدم طلب مشان اخد إصدار جديد.
7834	الحكومة بتدعم الصناعات.
7838	بتوقع عمره اكثر من خمسين سنة.
7858	إيش أقل عمر مسموح يعمل هيك؟
7860	عندي أي خرايط بسيطة للمدينة؟
7867	اذا ممكن، أنا بفضل ما تقلع السن.
7871	الإحصاء عبارة عن طابة وحدة وضربتين.
7883	أميت رح يوصل القطار على سان دييجو، لو سمحت؟
7913	واو أنا حاب أشوف صندوقك.
7925	بدي نتفة شامبو.
7947	أنا قاعد بفندق الهلتون.
7948	حاس بلعية ووظعي زفت.
7957	بس أنا عندي موعد عشان أشوفها الساعة ثنتين.
7972	هاي السيارة رايحة على إيدنبيره؟
7976	نعم، يا ريت تعبي هاي الاستمارة.
7983	قديش الدفع على الوزن الزايد؟
7991	اسمي كيمورا. بدي ألغي حجزي تاع يوم الجمعة.
7996	أووه، أنا آسف. كان في مشاكل منحلها. ممكن تستنى لثلاثين دقيقة؟
8039	بأي ساعة ممكن أعمل خروج من الفندق؟
8050	فهمت الموضوع.
8058	رح أحكي مع حدا.
8067	راح تحاسب عالفاتورة هسا؟
8068	السيارة اجتلي من جهة التقاطع.
8094	هاذ صندوق موسيقى.
8095	وين الضاحية؟
8098	في دورة بالباص نلف بالبلد؟
8108	على أي ساعة راح نبلش؟
8114	تمام، سيدي. مقاس ميديوم منعطيك فرو السمور من ماركة " ميركوري " . بناسبك؟
8116	سوتلك كدمة بالعضل.
8141	بس بدي توعدني تشوط الطابة، مش أني. طيب؟
8143	كم المسافة اللي ظلت ؟
8149	ممكن أستعير شرارشف؟
8156	شو نوع الجلد الاصطناعي المصنوع منه شنطة السفر هاي؟
8161	أنا ما بظن إنه هاي السكينة نظيفة. بتقدر تجبلي وحدة تانية؟
8164	أنا اشتريت هاي من دقيقة، بس ممكن اتبدلي اياها بهاي؟
8173	بصراحة، ما بتفق مع هاظ.
8177	هاد الطريق الصح للمحطة الرئيسية؟
8183	قارب مع مرشد ، لو سمحت.
8193	بدي أطلب بدلة لونها غامق عشاني.
8194	هاي الشمسية بقدر استخدمها كعصاية.
8202	لازم أترك كل اغراضي بغرفة الامانات؟
8210	لو سمحت ورجيني جواز سفرك.
8227	في أي مكان بقبل طلبات الغسيل كل يوم أحد؟
8233	اثنين برجر بالجبنة، لو سمحت.
8234	أي باص بروح على ميامي؟
8236	بس ما في داعي للبخشيش.
8248	بامكانك تشوف واحد بقاعة كارنيجي.
8250	أنا مش مؤهل.
8271	شو هو الصنف المميز بالمحل؟
8280	أنا بدي موعد عند الدكتور.
8291	يا ترى في طاولة فاضية أحجزها قريبة من الشباك لسبع اشخاص المسا.
8295	إنت ما عندك مشكلة اني آجي على بيتك؟
8305	شكله في مجال للتحسين.
8316	وين المترو؟
8334	عندكو منه سايز أصغر؟
8338	من وين بقدر أجيب أسبيرين؟
8342	هيك أقل سعر.
8349	لو سمحت أعطيني اذن لمدة أسبوع.
8355	هاذ زميلي.
8358	شو نوع البنزين اللي هناك؟ سوبر، عادي، ولا خالي من الرصاص؟
8368	هون واحد.
8371	حاسس حالي رح أرشح.
8409	بسكر أيام الإثنين، بس أي يوم ثاني بكون فاتح. بظن أنه بفتح من التسعة للخمسة.
8418	هاذ سمك الانقليس مع صلصة خاصة محطوطة فوق سلطانية الرز.
8435	"خلينا تحتفل" هيك قال وأخذني على البار. حكى انه رايح يعمل مكالمة وراح وما رجع إجى أبداً وأنا تورطت بفاتورة كبيرة.
8454	كم سعر الغلون الواحد؟
8456	كان معي جواز السفر والفيزا بجيبتي.
8485	حجوزات الساعة سبعة، بإسم مانو.
8495	ما بدك تشرب كاسة شاي؟
8497	ممكن تحكيلي وين بقدر ألاقي القنصلية اليابانية؟
8509	في دكتور للفندق أو واحد ع علاقة بالفندق؟
8516	هو دايماً بتسوق من شارع بوند.
8527	جريدة بالانجليزي، لو سمحت.
8535	ما في أي مكان بعزف ألحان ريفية؟
8539	حاب أشيك على اشيائي الغالية.
8543	في منتجات صوف ثانية؟
8551	كم حق العباية الوحدة؟
8574	طيب، إكبس تسعة وصفر واحد واحد، وبعدين الكود تبع البلد ورقم التلفون.
8577	ممكن تعطيني كولا دايت؟
8584	بقدر اطلب؟
8595	انبسطنا بلفة لطيفة بالسيارة. شكراً الك.
8604	عفواً، ممكن نخلص من هاد الموضوع؟
8610	العدد الكلي لسكان اليابان حوالي مية وثلاثين مليون.
8618	بدي استأجر شمسية.
8625	صح، وأنا بدي احاسب يلي رنيت عليه على حق المكالمة.
8636	محفظة فيها مية دولار وبطاقتين فيزا.
8637	المي كثير حامية.
8675	إنت هون.
8688	بكرج قهوة، لو سمحت.
8690	بنطاقش بدرجة كبيرة.
8696	معدتي بتالمني بعد الوجبات.
8734	وااااو، هاذ مكان حلو.
8741	ممكن عنده صعوبة بالتنفس.
8749	قررت؟
8788	إذا إنت حاب، ممكن نستريح هون.
8791	ضيعت أثر رسالة مسجلة.
8803	ما بتقدر تغير شغلك ببساطة.
8805	شو هو الموقف الجاي؟
8811	طيب ، بس مش على مكان الكراسي المكشوفة. اليوم كثير شوب.
8823	إنزل هون، وروح على باص رقم ستة.
8824	لازم ألحق طيارة الساعة عشرة الصبح.
8827	بعدني حاس حالي بدي أراجع.
8833	ما بدي أي اشي ظخم.
8840	الحساب، لو سمحت.
8844	كم سعر الفطر الطازا؟
8850	الحساب ، لو سمحت. يتقبلو بطاقة فيزا؟
8851	اليوم راح أروح أشوف كيف منظر الحيّ الصين.
8880	اثنين صفر اثنين تسعة ثلاثة تسعة ستة سبعة صفر صفر.
8900	أنا حاب أقلع سناني.
8905	بدي شنتة مكياج.
8907	ما بعرف قديش لازم أترك بغشيش.
8914	وين ممكن أحضر عرض" شبح الأوبيرا"؟
8915	بدي أشتري هدايا تذكارية لأصحابي. ممكن تنصحني بإشي؟
8918	بشكل أبطأ ، لو سمحت.
8919	كم معدل تكلفة الفاكس الدولي كل شهر؟
8947	مقلي من الجهتين، لو سمحت.
8966	طيب، هاد شكله واضح كثير، إنتو الثنين لو سمحتوا أعطوني رخصكو وتسجيلكو. وأنت يا إبني، اسف لازم نعملك فحص نسبة كحول.
9011	راح يكون جاهز بعد بكرا المسا.
9022	هاذ مصنوع من القطن؟
9029	عندي الدوا تاعي.
9034	شو بقدر أشوف بهاي الرحلة؟
9041	اه، هون في شراب واحد على الأقل.
9051	قديش تكلفته ليوم واحد؟
9061	هاد الباص بوقف قريب من الفندق؟
9073	بدي سي دي.
9077	في طيارات على شركات جال وانا اللي بتغادر الساعة عشرة وخمسة وخمسين دقيقة. بس، للأسف الطيارتين مفللات.
9094	مناسبيتني كثير.
9098	ممكن نحجز طاولة لخمس أشخاص؟
9100	هي ما بتفهم إنجليزي بالمرة.
9126	لو سمحت اصرفلي شيك سياحي.
9150	ممكن ادير بالك عليها من الساعة تسعة الصبح للساعة ثلاثة؟
9160	قديش تكلفة البريد الجوي لليابان؟
9176	ييي تسكر علي الباب . بتقدر تفتحلي الباب، لو سمحت؟
9211	شو هي أحسن رحلة عشان أشوف أشهر الأماكن؟
9229	في أي مضيفات بحكن ياباني؟
9242	كم شنتة بقدر آخذها معي على الطيارة؟
9263	لا، يا أستاذ، اليوم بعد الظهر كله محجوز. لكن بتقدر تحجز بكرا .
9267	رايح اسأل البواب عن الأجرة الصحيحة.
9303	أني جد آسف.
9308	عنا حفلة يوم الجمعة بالليل. ليش ما تيجي معنا؟
9312	طيب، غرفتك يا آنسة هي تسعة صفر ثمنية. هاذ مفتاحك.
9316	اشي كثير مهم إنه قدرنا نوصل لمجموعة المواد الأساسية اللي راح نحتاجها للمشروع.
9324	عفواً، ضابط؟
9325	هاد القطار بروح مباشرة على إدنبره؟
9329	هاظ معفي من الضرايب؟
9337	طلع اشيائي الغالية برا، لو سمحت.
9358	قديش بكون في زحمة في مثل هاي الرحلات؟
9367	أني حاب أشتري شوية هدايا تذكارية. في محل مناسب قريب من هون؟
9372	لأي ساعة بتظل فاتحة؟
9384	هو برا هسا.
9385	مايومي، ممكن تعبيي هاي الورقة بتوقيعك؟
9431	هي واحده إلك يا أستاذ.
9432	ما عندي شناتي للتفتيش.
9446	أكيد، كون على طبيعتك
9450	أنا هون بشغل إعلامي.
9463	عندكو أفلام للصيف؟
9481	متى بوصل القطار الجاي اللي رايح لواشنطن العاصمة؟
9494	الأواعي الطويلة هي الموظا هسا.
9516	أنا راح أرجع على اليابان الإثنين الجاي.
9526	ممكن أشوف خريطة للمترو؟
9542	هو الطريق طويل؟
9560	ممكن تبدلي هاي بوحدة جديدة؟
9576	شخصين.
9579	من وين بقدر آخذ شنتاتي؟
9581	مش مرتاح . بقدر أنزل الكرسي تبعي؟
9604	الساعة احدعشروخمس واربعين دقيقة في الصبح.
9605	ممكن ادلني على مطعم معروف بين الشباب؟
9606	سيارته كانت ماشية على اعلى سرعة.
9611	ممكن أترك رسالة؟ أنا بتصل عشان اأكد على موعدي مع الإستاذ إيبرت يوم الأربعاء الجاي الساعة احدعش الصبح.
9628	بتقدر بأي طريقة تشرحلي مرضك بالإنجليزي؟
9634	ممكن تودي تكسي للمدخل الرئيسي بويستمانستر مول؟
9651	كم قطار رح اركب عشان أوصل هناك؟
9657	هاد صح؟ خليني اتأكد. أووه، أنا جد آسف، انسة تاكاناو. هاد غلطنا. هون فاتورتك الجديدة. ممكن توقعي هون، لو سمحتي؟
9673	الباقي خمس دولرات، لو سمحت.
9683	سدادة البانيو ما بتسكر على الأخير.
9687	هاي مجرد هدية تعبير عن تقديري.
9688	ممكن تعبي هاذ النموذج؟
9695	شو رأيك بموديلات البلاستك هاي؟
9701	شو الماركات اللي عندك؟
9702	هاد الكعب كثير عالي بالنسبة إلي.
9710	سكر الباب من جوا وانا طالع من الغرفة.
9730	قديش قعدت بباريس؟
9732	ممكن أوخذ طوابع بريد لثلث رسايل بالبريد الجوي على اليابان؟
9746	بتنلفظ جي أوه آر أوه اتش.
9747	بتحب تشرب إشي؟
9748	تمدد هون.
9752	خليها رسالة عاجلة، لو سمحت.
9788	بناءً على النشرة الجوية، راح تثلج بكرا.
9792	بدي طابة.
9822	أكيد. راح نكون مبسوطين نعمل هيك.
9829	هاي، كتاب ماليزي كوميدي. راح أشتري واحد عشان آخذه على الدار مثل كتاب محادثة.
9862	الطريق للنجاح ل " جينمياكو"، صح؟
9866	راح أوصل لفندقكم حوالي الساعة تسعة بالليل.
9885	أنا معي حوالي ألفين وخمسميت دولر بالين الياباني.
9903	اه، إحنا منعمل. راح أورجيك شوي.
9906	بدي حبوب منوم.
9910	راح أظل هون للساعة تسعة. بتمنى إنكم تمسكوا المجرم بأسرع وقت.
9945	أنا متأكد إنه المجرم قريب.
9948	عشر طوابع لو سمحت.
9949	التهب حلقي .
9955	أنا بدي شوية هدايا تذكارية من نيويورك.
9969	أني بعمل تشيك اوت. ممكن تودي عامل لفوق؟
9979	ساعتي وقفت.
9983	أووه، هي هيك؟ كيف بتحبها؟
10006	إحنا منفتح الساعة تسعة الصبح.
10032	بدي دفتر تلوين.
10037	بتوقع إنه عندي دوخة بسبب الطيارة.
10043	لازم أروح على بنك ياباني؟
10045	إنت لازم تصرف المصاري من البنك.
10065	معنا وقت كافي لنخلص إجراءات المغادرة؟
10069	جوزك واحد من أهم زباينا.
10078	بتعرف دكتور اسنان كويس؟
10084	أوه، لازم تبلغ القنصلية هسا.
10091	محرك، مش مخفوق.
10098	سيدي، بتحب طاولة بالمطعم الرئيسي ولا بغرفة خاصة؟
10102	عدد كبير من الناس بروحوا على الشط خلال الموسم.
10107	وزني حوالي مية وخمسين كيلو.
10111	لوين لازم أحول؟
10114	وين مكتب الأشياء المفقودة؟
10116	في أي باص بروح هناك مباشرة؟
10125	انا بحاجة علاج خاص؟
10129	راح ادفع كاش ولا بنزاد عالفاتورة؟
10134	رحلنا لهاظ البيت من سنة.
10155	قديش الفيزا بدها وقت عشان تطلع؟
10156	وين الحمامات؟
10160	المبلغ الكلي بطلع ميتين وثلاثة وأربيعين جنيه، يا مدام.
10164	هاي هدية. ممكن تلفها بورق هدايا حلو؟
10182	ما أحلى المنظر . طرق رائعة الجمال.
10187	في ناس إنصابوا.
10191	عفواً، وين المحطة اللي هون؟
10224	مزبوط، عنا حجز إلك.
10238	عفواً، أنا بدي أروح على الفندق موجود بالمدينة بالباص. من وين بقدر آخذ باص؟
10243	جاج، لو سمحت.
10257	هاي الغرفة رقم اثنين صفر واحد. بدي أطلب فطور بكرا.
10272	شو رأيك بالتحرشات الجنسية اللي بتصير بمكان الشغل؟
10318	عندي أختين.
10336	رحلة رقم اثنين صفر ثمنية، لطوكيو.
10354	معناته خلينا نحشيها من جوا.
10366	خلينا نلتقي عشان اناقش هاظ الموضوع أكثر.
10372	كيف بدك يسرحلك شعرك اليوم؟
10403	بتقدر تحكيه بجملة غير؟
10408	رح استخدم اللي موجود عندكو.
10411	بدنا طاولة قريبة عن المسرح.
10416	أنا مرتاح. زين, رايح على وين؟
10433	إنو ارتفاعه ألفين وأربعمية متر.
10435	أدخل. لو سمحت حطها على الطاولة هنيك.
10440	من فضلك إلغي رقم البطاقة حقي.
10468	معذرة, صارت خلصت، بس رح يرجعوها بعد يومين أو تلاتة.
10473	ممكن أخذ شوية قهوة؟
10477	ما عندي موعد، بس الأمور ضرورية.
10479	هو مش صنوع منيح.
10480	وين الأسانسير؟
10497	عندكم كتالوج على العروض؟
10500	وين دخلة المترو؟
10504	انا ضايع تذكرة الطيران حقتي.
10559	ما بتقدر تضل هون خلال العطلة؟
10562	اووه، معذرة الك ازعجتك.
10563	ممكن تحجزولي بالعرض؟
10565	في غرفة استراحة عامة جنبنا هون؟
10590	شو الإجمالي؟
10593	هاي زينة كتير. هسا الأسئلة، لو سمحت.
10599	عندك عملة للبارك ميتر؟
10617	أغلب اللي بعناه من منتجاتنا على مرّ الأربع سنين اللي فاتت هي الآلة الناسخة، طراز أ . أكس أربعة خمسة صفر.
10645	بدي ألف يمين؟
10662	فيه مضيفات بتحكي ياباني؟
10670	سعر حلو، مو هيك؟
10680	لازم تاخذها تسعة وتسعين مرة باليوم، قبل الأكل.
10707	بحبه فعلا.
10733	بدي حامل ثلاثي.
10736	بدي جاكيت رياضي.
10749	ممكن تفضل تقعد ببيتي.
10753	بتقدر تدير ظهر كرسيي لورا، لو سمحت؟
10756	كتير حلو. كنت قاعد بدور على تاكسي بس هاي احسن.
10760	جاكيت حلو. هاد صنع بريطاني؟
10778	بدي اروح على مركز هارفارد. ممكن تقلي لما نوصل هناك؟
10790	رجالين وضوجين، لو سمحت.
10817	شو السعر؟
10824	كان فيلم "حرب الكواكب" من أشهر الأفلام سنة ألف وتسعمائة وأربعة وثمانون.
10830	وين القسم اللي الناس ما بتتدخن فيه؟
10831	الحرف " ت " "زي في توم، ايوة هاي عندي هون، تارو."
10848	بظن انه منظره صاير حلو.
10851	بدي شوية تفاح، لو سمحت.
10869	شو فايدة هاد؟
10882	شو نوع الفيزا معكم يلي بتقبلوها؟
10922	عندي وايد وقت.
10930	ماشي، وقت الاكل صار. بتحب نحكي عنها واحنا ناكل؟
10937	سرقو مسجل الفيديو من غرفتي.
10950	مرحبا، اسمي أودا. عندي حجز هالليلة، بس راح يتأخر وصولي. يرجـى خليكو الحجز لي.
10953	هاذ البوط قوي؟
10955	من فضلك قللو أني باستنا زنغته.
10964	بيقولوا انو الإنفلونزا معمية هنيك.
10973	جا هسا.
10975	معذرة. الحجز متكدس لبكرا الليل.
10976	أنا مع شوية صحاب.
10985	زي ما بقول جورو، السيد يامادا عنده طفلين.
10994	ممكن تعيد هاي ثاني؟
10997	بدي أروح على برج لندن.
11019	من فضلكم، إربطوا الأحزمة.
11027	رقم المنطقة ثلاثة. ورقم التلفون اثنين ثلاثة أربعة ثلاثة اربعة صفر صفر.
11030	معذرة، فيه جسر قريب من هون؟
11041	معليش، بدي أروح على الحمام.
11046	هيه مشغولة.
11047	هدومه دايما موضة قديمة.
11054	عندكم اكل بحري؟
11057	هاي بتكلف شوي.
11058	بدي هيك، بس خايف ما أقدر هالمرة.
11064	ماشي، مش عارف لحد الآن بس رح أحاول أكيد.
11069	الملح لو سمحت.
11082	من فضلك استخدم غرفة القياس هنيك.
11100	تسعين دولار على تذكرة الروحة. نقدي أو بالكارت؟
11109	ممكن تفرغلي الطاولة، لو سمحت.
11123	كيف بيربو الآباء اليابانيين ولادهم؟ همة شديدين مع عيالهم؟
11126	ممكن تحكيلي عن ساعات الشغل؟
11131	من فضلك غلفها كل وحدة لحالها .
11161	معدتي كبيرة.
11171	بتبدو هاي زينة، وين بنقدر نستناك؟
11174	بنقدر نبلش نلعب لما يخلصوا؟
11190	عدد الناس اللي في اليابان حوالي مية وعشرين مليون.
11197	املي البنود اللي جاية على كرت التسجيل.
11199	ممكن أرجع متعلقاتي؟
11240	عندكم وشاح حرير؟ أنا بدور على هدية للزوجة.
11246	رح نجيبها هلا . شو رقم غرفتك ؟
11264	الاستاذ كوباياشي كان عم يدور عليك.
11267	بدي أروح من شنغهاي لهاواي عالسفينة.
11278	ممكن تبعت حدا؟
11282	بتقدر تجهزو عالخمسة بعد بكرة؟
11302	بتخد عشر دقايق اذا مشيت على رجليك.
11316	قبل ما نخلص الشغل، بتقدر تعطيني شوي دقايق؟
11325	وين ممكن أقف سيارتي؟
11336	ماسكني برد ومعدتي عم توجعني كتير.
11342	ويسكي ومي، لو سمحت. عندكم سندويشة صغيرة او شيء خفيف معه؟
11343	شو الطريقة عشان أطفي الدواية؟
11360	هو مشغول كثير اليوم؟
11374	بدي شوية خيط.
11375	عطيني وصفة طبية ، لو سمحت .
11378	بدي اقصّره بوسطة وحدة من هادي المنطقة.
11392	ما بحس حالي منيح. لو سمحت، اعطيني شوي دوا.
11403	ممكن اختار جريدة يابانية، لو سمحت؟
11404	طيب، بقدر اترك السيارة بأي مكان؟ كم الرسوم على ركن السيارة؟
11412	أي باص رايح عالدوار الرئيسي؟
11420	في أي قطار سريع لبوسطن؟
11435	من فضلك, كون صاحبي عالتواصل.
11438	رح اسكن مع صاحبي.
11442	أنا متأثر كتير, ما قادر أضل ساكت.
11449	ممكن أنزل عند فندق هيلتون؟
11450	بديك تشيله.
11457	روح يمين بهالشارع وبعدين اتوجه يمين عند اول منعطف.
11462	بدي اعرف اذا بينفع اشحن هالطقم صحون لطوكيو.
11467	بدي شوي قوة بالجسم.
11478	ما في أكل متبل ومش حار كتير؟
11479	هو قريب عشان نوصلو مشي؟
11491	بدي شوية كريم للإيد.
11493	بتقدر تعطيني الملح؟
11500	بدي اروح على وول ستريت. كيف بممكن وصل هنيك؟
11541	كتير كتير من التمرين بيضر فيك.
11544	بتشمل الفطور، الضرايب، ورسم الخدمة، الحساب رح يكون خمسة وأربعين دولار للواحد في الليلة.
11550	ممكن تصلح هاي؟
11574	مسا الخير. أهلين.
11576	ما اقدر اعثر على اغراضك.
11595	روح ع طول، لو سمحت.
11600	هل آمن نشرب الماء اللي هون؟
11622	اها، يلا. بس دولارين.
11626	ممكن تبدِّل هالفستان بواحد أكبر حجم؟
11631	ماشي ، يلا نروح. بقدر اساعدك بواجبك المدرسي بعد ما نكل بيتزا شوي.
11633	أيوة، يا سيد تاناكا، في عندك رسالتين.
11643	مش مناسبني.
11646	بكرا يوم تاني.
11663	ممكن اقدر اساعدك . بتحتاج فيتامين سي؟
11689	وحدة سرق محفظتي في القطر.
11704	هو بعيد كتير. فضل أكيد تاخذ تكسي.
11708	بدي كرسي يطل عالممر، لو سمحت.
11709	بعيش بشقة، الإجارتها ثمانين ألف ين بالشهر.
11714	ممكن أقاطعكم؟
11720	عرض عليي مقاس أكبر.
11734	معلش، بتمانع تبدل معي مكانك؟
11746	أيوا، أكيد.
11751	روح على السوية ولف شمال عند الاشارة.
11754	بتحبي القناع للشعر أصغر ولا أكبر؟
11767	بدي غرفة فردية مع حمام بـثمانين دولار, لو سمحت.
11800	بدي أودي أغراضي الغالية في صندوق الفندق.
11817	عندكم غرفة فاضية الليلة ؟
11821	ايوه، بس تأكد إنه تذكرتك معك.
11862	ما رح ينضم للجولة الاختيارية غير شوي من الناس.
11872	ما تشيل هم. يلا، خذني لو سمحت لمركز الحي الصيني. راح احاول ادور الجهة وحدي.
11879	رح توظف ناس جداد في نيسان.
11880	بتمنى هيك.
11885	تنين ويسكي مع مية, لو سمحت.
11901	مين اللي عم يعزف؟
11913	ممكن تحكوا معي لو لقيتوا شنطتي؟
11916	على اليسار، لو سمحت.
11932	بتقدر توقف معي شوي عشان نصور صورة؟
11938	لا . بدك تبلغ عنو ؟
11949	هالسنة في الامام بتوجعني.
11959	شو أحدث ألعاب الكمبيوتر لولد عمرو خمسة عشر سنة؟
11972	رح نشوفك بكرة.
11973	في مطعم رخيص قريب من هون؟
11975	لا، بس شكرًا هونيك. أنا حاسس انو صرت أحسن.
11976	عندكم خبز؟
11977	شو مستواك بعزف الكمان؟
11990	قدما صاحبي انزلقوا ووقع بالحمام.
11991	بدي منطفة سجاير.
11997	مسكرت المسيحية وسكرت البلاد عن باقي الدنيا.
12005	شو الكمية اللي بدك ياها؟
12012	خليطة جمبري لهي وكمان لي.
12033	هات خلي توقيعك هون وأول حروف اسمك هون.
12035	فرحت كتير لما زرت مكاتبكم الرئيسية وكمان النقاشات الهمة اللي صارت بيناتنا. كتير شكراً على العون اللي قدمتوه.
12054	غطيطك معصبني.
12056	لونها مش عاجبني ابداً. ممكن أرجعها؟
12057	طلع من هاي الباب، و انطر عند المحطة رقم ستة.
12060	دجاج مشوي، لو سمحت.
12069	ممكن أخذ شوي فلفل؟
12074	أيوا بدي إشي أقراه.
12101	أنا الأستاذ تكاهاشي بالأوضة رقم ٥٩ . لو سمحت بدي أربع بطولين من البيرة بودفايزر.
12131	هاي سبعين دولار.
12140	من فضلك، كلمني بالفندق لما تلاقي شنطي.
12150	بدي مكالمة تصحيني الثامنة ونص بالصبح بكرة ، بدي المعروف يا رجاء .
12167	أيوة، بس هاي كتير كثير ، وأنا صرت أكلت كفاية.
12172	بدي أغسل حلقي.
12173	أنا حاسس حالي مريض.
12182	بتسووا تنزيلات كبار؟
12193	طوكيو صفر تلاتة أربعة مرات تسعة أربعة خمسة ستة سبعة.
12240	من فضلك، ساعدني اعثر على حديقة الحيوانات.
12246	ممكن تحكيلي كيف اعدلها لو سمحت؟
12247	إمتى تقريبا رح تخلص دورة الباص؟
12254	وَرِّني كيف بدي استخدم التلفون.
12259	أكيد. عنا شوية ماركات أمريكية أصلية حلوة. للكتب.
12298	بدي شغيل بيحكي ياباني لو سمحت.
12331	احنا بنهتم بالأزياء.
12333	ممكن تجرب سيارتي؟
12345	هاي عيادة إف؟
12364	أهلا وسهلا يا سيدة ياماجوتشي، فريقك عم يكلمك. رديت على دعوتك. استمري، من فضلك.
12391	من وين بقدر اشتري تذكرة توصيل بالكوبون؟
12396	إمتى بنوصل على لوس أنجلوس؟
12403	امشي بنفس الاتجاه حوالي خمس دقايق و بعدين ارجع على الشمال.
12416	هوي ع هالشارع طالع على البحر.
12420	هاي الشاي العشبي بتساعد الجسم يرجع نشاطه.
12421	ما صنعت هاي باليابان، صح؟
12443	ماشي، خذ هاي الطريقة. لو سمحت، رح أوصلك لغرفتك.
12479	لازم اطلع من الفندق قبل الضهر.
12495	بدنا زوج همبرجر وزوج قهوة، لو سمحت، بدنا ناكلها برة المحل.
12510	بتسمحلي آكمل حامل هالشنتتين؟
12527	طلبت لحم مش سمك. ممكن تغير هاي؟
12546	طفلي صار مرهق كثير.
12551	بحس حالي بدي أتقيء.
12556	هاي الجاكيت مش مقاسي.
12557	بدي أشوف الأستاذ ويليم.
12560	فيها مزيج من سبع فيتامينات ومعادن.
12562	ال"سنة" عم تتقلب.
12589	رح أرجع اللي صرفته لما أرجع على اليابان؟
12599	شو مكونات هالصحن؟
12603	بأي بلد سووا هاي؟
12608	بتقدر تخلص هاي بعد عشر دقايق؟
12611	أنا مش بعرف أحكي إنجليزي. في حدا بحكي ياباني هون؟
12615	من وين ممكن أجيب تذكرة لأركب المترو؟
12638	رح نبعتلك عالبريد عشرين عينة زيادة.
12644	ما بعتقد انه هاد بلبقلي، جلدي ناشف كثير.
12650	ممكن أحصل على جدول الوقت، لو سمحت؟
12658	ايوا، بظن إني رح اطلع.
12671	تسعة وتسعين دولار بالساعة للطفل ؟
12672	معذرة، هاد النوع خلص عنا.
12677	لازم تكوني هادية.
12678	عندي أدواتي الخاصة.
12679	بدي مفتاح الغرفة خمسة صفر تلاتة، لو سمحت.
12699	إمتى بتيجي عرض فيلم "رجل المحطة الأخيرة"؟
12701	وين الحلاق؟
12708	بالساعة السابعة ، لو سمحت.
12712	دمرت شنتتي.
12713	لتشوف المناظر.
12732	أنا من إسبانيا.
12750	فيها غلطة شكلها بالكارت هاي، عطني وحدة ثانية، الله يخليك.
12755	في طفح على إدي.
12761	بتمنى تبعت هاد بالبريد الجوي لليابان.
12766	وين أقرب صيدلية؟
12770	زيادة من العنبية، لو سمحت.
12773	الناس حابيين كثير.
12776	قديش الأشربة اللي السعر بيغطيها؟
12777	قدرت أوصل لهذا الشي.
12782	وين باب صعود الطيارة لهاي الرحلة؟
12790	لو في امكانية, احجزلي طاولة عند الشباك لو سمحت.
12805	هل فعلا اعلنوا انه لازم نصعد على الطيارة؟
12810	احنا على ارتفاع اتناشر ألف قدم.
12820	بالأول، بدنا نتفرج على وول ستريت.
12822	وين محطة الباص اللي بتروح على أكسفورد؟
12823	رح أستنا لحتى يصير الجلوس بالتراس ممكن.
12835	ممكن نتطلع على محافظ جلد؟
12861	خلينا نتفرج على التلفزيون. في مباراة بيسبول.
12878	تقدر تكتب عنوانك هون؟
12884	قولي لي بتكرم أين أقرب صيدلية.
12903	للفندق تبعي، لو سمحت، العنوان تبع الفندق ع هالورقة.
12905	أديش محافظات في غير طوكيو؟
12917	خليك على الخط و استنى شوي من فضلك.
12936	شو بتعمل بالعادة بالبيت بعد ما تتعشى؟
12941	طبعاً. أميت بدك تلعب جولف؟
12945	رح تكون بالدار حوالي الثلاثة.
12952	بدي أحكي بالتلفون مع السفارة اليابانية.
12968	زيدني شوي.
12969	من وين بتطلع الباصات حتى نشوف المناظر؟
12973	قديش بدك توخذ عشان تبعثها على اليابان؟
12976	ما عندي لا مظارب ولا أحذية.
13015	بتوخذ بالين ياباني؟
13022	عندك سيارة من نوع ستانج؟
13027	رح إنط من هون؟
13069	يا أستاذ كاواي، عنا طاولة الك حاليا. تعال من هون.
13072	أكيد، إنزل من الدرج هناك وراح تلاقي تعليمات، اتبعهن لو سمحت.
13075	أول مكتب من قدام . شلون بقدر أخدمك؟
13076	ممكن تنزلني عند فندق الهيلتون لو سمحت؟
13077	بتظطر كثير تشتغل لوقت متأخر؟
13090	آسف كثير, ما عنا زيادة. شو رايك بالجرايد الإنجليزية؟
13095	مية غير اللي بدخنوا، لو سمحت.
13096	بصير تخبرني قبل ما نوصل لـ درهام؟
13113	هو طازا لهالدرجة
13116	هاظ مش صحيح . إنت دايما بتعاملني.
13118	ممكن توريني شوي من الفساطين؟
13126	هجي الكلمة لو سمحت؟
13133	بلش العرق يسكرني.
13134	انتبه لأنه جو الجبال بيتغير بسرعة.
13159	بصير تستعمل شيكات سياحية وعملة ين ياباني؟
13162	بعتذر، تأكدت من إدارة الخدمة وإدارة المقودات وما لقيتها عندهم.
13172	صعب يلتقى هالمكان. هو بدخلة بتتفرع من الشارع الرئيسي.
13183	ما بعرف إشي عن هالشغلة.
13184	ممكن نحكي عن هالموضوع بالكافيه.
13188	فهمت، بهاي الحالة ما عليي أدفع فلوس التبديلات، مش هيك؟
13202	إعطيني عامل التلفون لو سمحت .
13262	ممكن تنزل السرج، لو سمحت؟
13264	بقدر أبات عندكو الليلة؟
13267	ماشي، رح أوخذ بس ثنين. شكراً.
13268	هاي فاتورتك. الحساب ثلاثة تسعة وسبعين دولر.
13269	إنت محظوظ.
13287	من فظلك إختارلي طاولة مع منظر حلو بالليل.
13290	هاذ صناعة آلية ولا يدوية؟
13291	بدي أستأجر هاذ الموديل من السيارات لمدة أربع وعشرين ساعة.
13306	كثير كان حلو إني اجتمع فيك.
13322	هو إمزع.
13333	طيب ، خلينا نطل عليك .
13347	طيب، تخيل كم رح يطول وقت شغله لو سأل كل واحد سؤال ثاني. يلا نروح، خلينا نسرع ونجيب شناتينا. لازم نروح على الجمارك عشان نعلن عن اغراضنا بعد هيك.
13396	شو الوزن؟
13399	في مطعم صيني قريب من هون؟
13407	الرصيف رقم خمسة موجود هناك.
13408	متى بتبلش مباراة كرة القدم؟
13423	هاي معطلة. بتقدر تشيّك على آلة التصوير هاي؟
13424	قهوة مع القشطة والسكر، لو سمحت.
13436	بظن انه في أغلاط بالفاتورة.
13438	لو سمحت اعطيني هاي.
13440	هاي البوابة السابعة.
13444	إنت سكتلندي ؟
13446	ثلاثه اثنين واحد اثنين. استناني شوي , طيب؟ بدي أبعثلك اشي هون. اعذرني.
13471	مية وخمسة وثلثين ين للدولار الواحد.
13476	مش ممكن تخلص موضة التنانير القصيرة مع الجزم الطويلة.
13477	بقدر أحكي مع المدير؟
13480	ليش السعر غير عن اللي عالعداد؟
13484	ممكن أشوف هاظا؟
13487	وعدت حالي انه رح أعرفك لما بشوفك.
13488	شو اللي كان صاير من زمان؟
13492	ما بحس حالي ملبح. ممكن ادلني على دكتور؟
13504	حفلتك مبلشة هسا. تفظل.
13515	في عرض ترفيهي بالليل؟
13528	سيفون الحمام مش شغال.
13532	قديش بدنا وقت عشان نمشي من هون لبناية البلدية؟
13547	أخذ هاظا الدوا بعد كل وجبة لما يزيد الوجع.
13550	حطيت المصاري بظرف خاص مزركش اسمه شوجيبوكورو.
13553	انصاب عنا واحد.
13609	بفكر شو بقدر استلم منو؟
13624	عندك خريطة للمترو؟
13629	عندي غرفة جاهزة إلك بالجراند هوتيل. بتقدر تروح لهناك؟
13635	عندي وجع بعيني اليمين.
13657	ما بعرف ألماني كثير.
13660	لازم نجتمع مرة ثانية أكيد.
13666	ممكن توخذ هاي البنطلونات؟
13682	ممكن أستعير مضرب وطابات؟
13685	بتقدر ادخل معه شوية فراطة؟
13694	ممكن أوخذ نص بريق؟
13707	مرحبا. أني جون.
13717	ناكاي .
13719	بتمانع لو أخذت صورة إلك وللتكسي تبعتك؟
13733	اتصلت من ثلاث أيام عشان شنتة ظايعة.
13748	بدي فندق أرخص.
13755	اووه، فيه شغلات كثير لازم تشوفها في قرية جرينتش.
13769	في شغل. عندي واسطات شغل هناك.
13783	بناسب سترتك .
13784	ممكن تراقبلي شنتي ، لو سمحت؟
13788	شو رأيك بهالفكرة؟ احنا قبلنا بشرطك اللي كاتب فيه عن فترة انذار مسبقة قد ما تكون ستة أشهر، بس بس يكون عنا الحق نبيع لمدة ستة أشهر بعد ما نخلص العقد.
13803	معلش . بتعرف نيويورك مليح ؟
13824	رح نستنى . لو سمحت, إتصل فينا لما تكون جاهز.
13827	بدي اروح عند دكتور جراحة.
13828	هاي مكونات طبيعية؟
13831	بدي أطلع بسيارة سبايدر.
13843	رمز المنطقة هو صفر تلاتة. والرقم هو تلاتة واحد اتنين تلاتة أربعة خمسة ستة سبعة.
13854	صار عنده رشح.
13856	أحسن اشي هو سي دي صغير.
13862	بدي أبعث هاي عن طريق التوصيل العام.
13903	خليني أحوّل هاي المكالمة للمسؤول.
13913	شو السايز اللي بدك ياه؟
13919	يا حبيبي، ما كنت أدري إنه بعده عندي هاي الأشياء.
13920	عندكم علب لارسال الطرود ؟
13921	رح تدفع شركة الطيران رسوم الفندق والوجبات؟
13938	هاي كلها شناتيك؟
13942	شلون بدك تعمل المكالمة؟
13946	تمام ، هو غالي .اكيد مش صنع اليابان، مش؟
13953	ممكن تقربلي الملح، لو سمحت؟
13966	وين أقرب مطعم لهالفندق؟
13993	بدي شامبو للشعر العادي.
14008	متى بتظن رح يلاقوها؟
14014	بتمنالك سنة سعيدة كثير.
14018	رح أشرب قنينة سبرايت كبيرة.
14043	من فضلك عيدها مرة ثانية أبطء شوي.
14045	معلش . بدي أطلب طلب .
14059	عنا شريمب بصلصة النيوبرغ موزة خروف مشوية.
14069	بدي غرفة مع إطلالة حلوة.
14074	ثلاث كاسات من عصير الشمام، لو سمحت.
14086	عندي ثلاث ولاد.
14088	إمشي لقدام لاخر هالصالة ولف شمال عند الركن. بتلاقيها على يمينك.
14089	هي الرحلة ليوم كامل؟
14094	قدايش بتكلف تذكرة روحة رجعة لأوكسفورد؟
14098	روح عالجيم كل يومين.
14099	وين ممكن أسكن خلال الرحلة؟
14104	متى منقدر نعمل الاجراءات حتى نطلع من الفندق؟
14108	قديش بيوخذ الدليل باليوم؟
14120	وين بلاقي السيديات؟
14147	معلش، أنا طالب جامعي من اليابان. إنتوا طلاب بجامعة نيو يورك؟
14150	ممكن تحكيلنا كيف بتعمل هاي الخطة ؟
14167	أكي، بتعرف محل تسجيلات قريب من هون؟
14168	كاش ولا بالفيزا؟
14174	أني بشتغل بشركة تجارية.
14175	مش من الأدب تسأل الناس قديش بوخذوا .
14184	هاي من نوع ليفي خمسة صفر الأصلية؟
14195	متى بقدر أوخذ دش؟
14198	ما بتبين أكثر من واحد وعشرين سنة عمرها.
14219	فهمت. فعلاً هو فيه فلم سرعته عالية. بتمانع لو طلعته؟
14224	شتراها هسه بس.
14232	راح أجيب وحدة مباشرة.
14235	ثمن دولرات. وهون بتيجي وحدة هسا.
14242	لو سمحت، طلعها مع الاغراض اللي اشتريتهن بالجمارك بالمطار.
14261	في أي مول فاتحة هسه؟
14265	يا اللي بتشتغل بالاتصالات، اشبكني مع الدفاع المدني.
14266	بطاريتي صارت فاضية.
14289	وقّف عند التقاطع الجاي.
14292	آه، هيها . كل واحد لازم يعبي هاي الاستمارة للجمرك؟
14304	ممكن أعرف اسمك لو سمحت؟
14306	ممكن أعمل مكالمة وتوخذوا حقها من الطرف الثاني؟
14311	مرحبا . كيف حالك؟
14317	وين قسم السفر؟
14336	شو اسم الشخص اللي بدك تحكي معه؟
14347	أني آسف، هو مش جوا هسا.
14363	شوف هاظ. شوف هاظ. راح تحكيلي انو الفرق بين هالشب وهذاك الشب هو الحظ؟ محمد، واقف بالسيارة على زقاق الشارع، وإنت؟ ما راح تعترض اذا قعدت معك هون. انا تأخرت. كان لقاء حلو معك؟
14373	بتطل غرفتك على البلد؟
14389	في أي رسايل إلي؟
14400	بعدها غالية كثير. ممكن أشتريها بـثلث دولارات؟
14402	بدنا غرفة من ورا.
14403	راح أشرب كاس من الواين.
14416	بتبين حلو.
14426	بدي غرفة بتختين. قديش تكلفة الغرفة بالليل؟
14434	هي بتبعد حوالي تسعة وتسعين ميل.
14441	فينس وليندا بدهم يظلوا لحالهم، فبخاف انو لازم اظل هون الليلة.
14444	لو سمحت خلي هالشنتات بالجمارك.
14448	إسمي ساتو .
14457	بعرف نادي قديم لموسيقى الجاز بوسط البلد.
14459	رح أوكل هاي الأكلة.
14462	بدي أوكل صحن زي هاظ.
14475	بهالوقت رح نوخذها.
14477	هاذ بطلع للطابق السادس؟
14478	جلد التمساح الأمريكي.
14483	لو سمحت، حطه بكيس الغسيل و خليه هنيك.
14484	بدي أحمض هالفلم. متى رح يكون جاهز؟
14495	إذا بتسمح ما تنطي هاذ المفتاح لحدا غيري.
14500	و هو هيك . رح أمر عليك و اخذك بالسيارة من الفندق اللي إنت قاعد فيه عالساعة ثمنية.
14502	الشباك كويس
14505	خلي قصة الشعر تنزل لتحت، لو سمحت.
14507	كل تكاليف الشحن انحسبت ؟
14509	أوبرا المتروبوليتان.
14514	وين مكان تأجير السيارات؟
14519	حاس إني مليان طاقة من امبارح الليل.
14520	هاذ مش عزوقي.
14530	شو هي الخضرة اللي عندك؟
14531	بدي أعمل كيرلي لشعري عشان اخليه مفرود.
14534	متى رح يجي الدكتور؟
14537	هاظا اللون غلط.
14538	انكسرت السنة.
14542	هاذ الكرسي جنب الممر ولا جنب الشباك؟
14557	أني طالعة برحلة طويلة تمشاية عجري.
14564	ممكن توصل اغراضي للغرفة؟
14573	وريني وحدة لوحدة من الصبايا.
14590	بتقدر تمشي بهالجهة؟
14593	عندك اشي بسعر ثمانين دولر بس؟
14605	أني عطشان.
14612	بدون حليب, لو سمحت.
14683	عندي ثلث شناتي.
14685	وين البحيرة؟
14693	عفواً، نزل اباجور الشباك الخشب , لو سمحت.
14709	ممكن أوخذ وحدة من المجلات أو شي زي هيك؟
14718	هي باتجاه الجنوب.
14721	قديش بتكلف الكراسي تبعت البرندة؟
14734	حابين غرفة بتطل على البحيرة.
14737	فيه صناديق بريد قريبة من هون؟
14757	و هو هيك . رح اوصلك لهناك.
14761	الجزء اللي مكتوب بالطريقة المايلة بدل على التغييرات اللي صارت بالتسعينات.
14763	هو عمره ثلاثين سنة.
14777	و هو هيك. بتقدر تكتب العنوان مرة ثانية على هالظرف؟
14783	بدي اروح على محل الهارودز. معك خريطة, لو سمحت؟
14786	شو بتعمل بوقت فراغك؟
14789	عندك بطاريات لهاي الكميرا؟
14805	بدي أبعث رسالة لاسلكية.
14807	إنت الأخير بهاذ الصف؟
14810	بظن إنو الحجز طلع زاد عن العدد.
14813	تسديدة موفقة. راحت ما تيجي جول.
14818	ممكن تحكيلي عن الأماكن الحلوة هون؟
14820	في أي مول قريب من هون؟
14854	وأني هيك .
14862	بدي ألحق أسافر من سان دييجو.
14863	كنت بفكر أوخذ هالكورس بفترة نص السنة الجاية.
14887	الواين مش بارد كفاية. ممكن تبرده اكثر؟
14901	بتقدر تغيرلي هالقرط لوحدة تانية يمكن تنشبك.
14903	شو أكثر الأشياء اللي بتلفت انتباهك هسا ؟
14905	بدي أرجع المصاري. بقدر أوخذ مصرياتي؟
14926	يمكن ما بقدر أشرب هيك مشروب بأي مكان ثاني.
14933	لو اشتريت هاظ كمان, رح توصل للمبلغ اللي بيعفي من الرسوم.
14952	بقدر أشوف شهادة التطعيم تاعيتك، إذا سمحت؟
14960	بتسافر كثير؟
14969	أني من أمريكا.
14976	معي تذكرة طيران لـسان فرانسيسكو.
14998	لو المسافة خمسطعشر دقيقة بس من المجمع ، بمشيها لعاد.
15019	بدي فندق أرخص شوي.
15020	شكلها البونساي هواية الختيار.
15024	بعدني ما قررت. ممكن تعطيني وقت زيادة؟
15025	عندي صداع.
15036	تتفضل و تشرب قهوة معي؟
15037	بدي شهادة طبية و وصل عشان التأمين تاعي.
15046	آه، لأ. لو سمحت عجل، إحنا متأخرين.
15051	ما بدي أصرف أكثر من عشرين دولار.
15062	ليش ما طلعت الرحلة؟ قلي شو بصير.
15073	قديش الأجرة؟ ممكن تكتبها على شقفة ورقة؟
15083	بدي أستأجر كرسي اتمدد عليه.
15087	استنى دقيقة لو سمحت.
15088	لازم الستات يلبسن فسطان سهرة؟
15095	ما تلمسني.
15109	معك دخان؟
15123	ممكن نروح على تيكي اذا ما كان الهوا قوي.
15126	بجنن.
15133	رح أسكر هسا. شكراً على انتباهكو.
15145	عندك ألوان ثانية من هاذ؟
15149	مين هاظا؟
15157	معلش، بتقدر تدلني على موقف سيارات التكسي؟
15170	بتشرب إشي ؟ .
15181	هيها .
15201	وين أقرب محل لأجهزة الكمبيوتر ؟
15206	هه. ما بتشتغل، صح ؟ بتقدر تروح عكرسي فاضي اذا بدك .
15221	أني بدور على هاظ.
15240	طيب يا استاذي.. شو الحلو اللي بدك تختم فيه الأكل ؟
15246	باص عادي ولا باص مجهز للنوم ؟
15247	شيكات سياحية. شكراً. أخذ تذكرتك و الفيزا عشان تطلع على الطيارة. كون هناك قبل الرحلة بساعة لو سمحت.
15257	هو وجع قوي.
15259	الاسم هو جورو موتوياما . والرقم هو صفر ثلاثة ثلاثة اثنان ستة واحد اثنان أربعة تسعة خمسة .
15262	بحس حالي مريض كثير.
15274	متى وقت عرض "قصة حب كوسي"؟
15283	ماشي. رح تشرب القهوة هسا ولا بعدين؟
15292	دلني على أحلى اندية موسيقى الريجاي في نيويورك.
15295	شو الفرق بين منتجك ومنتج الناس اللي بتنافسك؟
15296	بصير حدا ما يتبع تعليمات الأمن؟
15319	الشوارع الخلفية خطرة ؟
15320	نعم ، اعمل الإشي الضروري.
15323	أها، بس وحدة؟ متى رح أعرف؟ وكيف رح يكون التعويض؟
15331	هاي الهوية تبعتي.
15337	بنحب طاولة جنب الشباك.
15347	من فضلك دلني على أرخص طريقة حتى أروح على سان فرانسيسكو.
15362	بتعرف المطعم يا كيويا؟
15378	اتجاه واحد.
15380	رح أصير ناصح لو استمريت قاعد هون آكل دايما.
15400	في نايت كلوب رايق عنده رقصة الفلامنكو؟
15419	حلو الفسطان اللي لابسيته.
15431	إجري بتوجعني.
15436	وين اقرب مغسلة؟
15443	ممكن نبدل كراسينا لو سمحت؟
15447	صار فصل بين كراسينا.
15452	بالواقع بدي أطلع ورقة تأمين على هالطرد كمان.
15463	وصلت الفاتورة لمية دولار.
15464	الأبواب الطارئة بتكون قدام, وفالنص, وخلف الطيارة هاي.
15470	ماشي، اتأكدنا من حجزك مرة ثانية.
15476	الكعب عالي كثير.
15477	بدنا طاولة على البرندة.
15482	هاذ يعني انو الفيلم ممكن يكون مش مناسب للصغار تحت الخمسطعش . اذا الوالدين لازم يوخذوا بعين الاعتبار اذا بدهم يخلو ولادهم يتفرجو عالفيلم .
15487	شلون بدك المصاري؟ لو سمحت، عبي هالورقة ووقع هون.
15509	بتوجعني معدتي مرات.
15522	عندكو وجبات قليلة الكالوريز ؟ أنا ماشية بدايت هالأيام.
15529	مش موجود رسم ظروري.
15539	أيوة ، معي تذكرتين لـ "العمالقة" و "المحتالين".
15546	إحنا من أكبر موردين لأجهزة الميكرو كمبيوتر .
15553	مشكور. وأنا كمان. بشوفك بعدين.
15564	غرفة مزوجة مع حمام لو سمحت.
15566	وقعت من على درج السلم
15575	شو الأيس كريم اللي بتنصح فيه؟
15577	هه. هاي. شكل اللون حلو عليك كثير.
15598	وين الكتب الأجنبية؟
15604	قطعتين وقنينة سبرايت .
15607	أعطيني دخان.
15610	فوته على البلد مش قانونية. آسف. ماشي، انا بفكر كيف بدي أهتم بكل اشي.
15652	أيوه، أنا. كانوا عايشين بحدي بكاليفورنيا بس انتقلوا على فلوريدا من سنتين. شو بالنسبة الك؟ بتسافر لحالك؟
15664	أنا مريض.
15666	على ما يبدو ابني تعبان من الحرارة.
15673	بهالمقاس لو سمحت.
15674	بعطوا وسام الاستحقاق الثقافي للفنانين والعلماء المتميزين اليوم.
15676	أني ياباني.
15692	هاذ سعره غالي كتير.
15699	أها، اركب الباص اللي بيروح على محطة كيوتو.
15710	هاظا للأعضاء بس ؟
15735	سعر الغرفة ست آلاف ين لليلة.
15763	بقدر أجيب هاذ معي عالطيارة؟
15775	ماشي. كل اللي بدي اياه هو أعرف إذا كان المشروع رح يجيب ربح.
15784	حلو. بدك شال بلبق مع هاذ؟
15788	عيد شحن البطارية من فضلك .
15791	أنا جاهز للطلب.
15798	أملاح حمام الأعشاب بتخلي بشرتك ناعمة وملسه .
15804	اكتب اسم شركة الطيران ورقم الرحلة برضه.
15814	فعلاً. اليوم الأحد، والأحد أسوأ الأيام.
15896	أيوة. هاي مشكلة كب الزبالة.
15897	بدي هاي النوعية لخمس أماكن مرصعة.
15899	أغلب العيل عندهم مصدرين للدخل.
15902	اه . هاي القضية نادرة " القمر والجرس " . بدك تغيرها متأكد ؟
15911	أمي وأختي جايات من اليابان عشان يشوفوني. رح يصلن حوالي الساعة سبعة المسا.
15942	اللون البني مرغوب هالسنة.
15950	فكرة صحيحة. متى بتنوي تيجي؟
15967	ماشي. كرسيين لو سمحت.
15989	وين السوق؟
16007	بدي اقيس بدلة السباق تبعتي.
16016	فكرت إنكو يا شباب بتوكلوا الكعك المخبوز بس.
16034	كم سعر تذكرة درجة أولى لإدنبره , إذا تكرمت.
16042	شكله المصاري اللي إنطيتني اياها ناقصة عشر دولارات.
16046	رنيت عالسيد سميث بالغرفة اللي رقمها 201 قبل شوي ، بس ما حدا رد. بتقدر تشوف اذا بعدو قاعد هون؟
16061	بدي وحدة جديدة.
16070	بشتغل بشركة نشر.
16073	بتقدر تتكرم و تعبي هاي؟
16080	شو هاظ الشارع؟
16082	بتقدر توزن هالطرد؟
16089	شو بتسموه هاذ بالإنجليزي؟
16091	ظل ماشي بالممر هاذ , و رح تلاقيها عالجهة اليمين.
16098	بدي أمّن على هاذ.
16106	صباح الخير. هاذ مكتب الاستقبال.كيف بقدر أساعدك؟
16127	ماشي. تعال فوت.
16130	أكيد, يا سيدي. بآجي هون عشان الفطور كل يوم, من الاثنين للجمعة، قبل ما أروح على الشغل.
16140	ما في أي مشاكل.
16141	لو سمحت، رنلي على الرقم ثلاثة اثنين ستة اثنين تسعة واحد ثمانية.
16158	اها، منقدر نخدمك من الساعة السابعة.
16167	لو سمحت، اتمدد هون.
16169	شو هاي الخدمة السريعة!
16191	يمكن تظل تطلع.
16217	لو سمحت روح عاليسار بالتقاطع الجاي.
16219	معلش، كيف بقدر أوصل للبنك؟
16222	في خدمة باصات بتروح على متحف فورد؟
16227	نعم. اسمك ورقم غرفتك , لو سمحت .
16231	قديش بده وقت لحتى يوصل لليابان عن طريق البريد الجوي؟
16238	تمام . بشوفك الساعة ثنتين يوم الأحد.
16258	بدي امر على نيويورك بطريقي لتورونتو.
16259	انكسر السحاب اللي عندي. عندك زيادة من نفس النوع ؟
16271	هاظا ضرب من الوساخة.
16279	ممكن تأكدلي الرحلة مرة تانية؟ هاي تذكرة الطيران.
16291	عندك هاذ باللون الاخضر الغامق؟
16292	ممكن توديني على كانتربري وترجعني هون؟
16311	بدي شوكة ثانية؟
16312	مشكور كثير على طيبتك.
16335	متأسفين، ما بنبيع تذاكر للمسرح.
16337	بدي أشوف هاظا.
16339	آه، هاذ حلو. شو لازم اعمل؟
16344	بدي أمدد إقامتي هون يومين ثانيات.
16351	لو سمحت غير مقعدي.
16365	عنا جمبري مميز كثير اليوم.
16371	لأي ساعة بتظل مفتوحة؟
16395	للي بيدخنو ولا لأ؟
16403	هاذ غالي كثير علي. ما بتقدر تنزل السعر شوي؟
16409	أنا جاهز الأربعا الصبح أو بعد الظهر يوم الجمعة.
16413	ما عملت حجز.
16434	لأنه الصيف باليابان عادة بكون حامي كثير، وما كان عندنا مكيف هوا زمان.
16444	ممكن تجيبلي تكسي بكرا الساعة ثمنية الصبح؟
16453	هاذ مشكوك فيه.
16465	ليش ما نستنى الباص تحت المظلة ؟
16477	تعال ، كينجي . خليني أوريك حوالين المكتب .
16478	أها ، هي فاتحة من الساعة تسعة للساعة تسعة.
16484	ما قدرت أنام مليح بالليل.
16487	شلون أثر الركود عالشركة ؟
16495	عندي موعد ثاني.
16516	ممكن خريطة لطرق المدينة؟
16536	هاي بالزبط اللي كنت بدور عليه.
16542	مش فاهم شرحك.
16546	لازم ندبر طريقة أو سيارة رايحة على بوسطن.
16547	وين أحسن مكان لشوفة المناظر؟
16576	هي قوية؟
16577	كيفت كثير .
16581	ماشي يعني، بدي عصاة مضرب اصغر مثل اللي مع جوليا روبرتس.
16586	ممكن توخذ هاذ، لو سمحت؟
16601	الركاب المسافرين على خطوط إيه بي سي الجوية رحلة رقم سبعة صفر ثلاثة واللي رايحة على طوكيو الرجاء روحوا على البوابة رقم عشرين عشان تخلصوا الأمور الرسمية.
16607	وين مجمع الباصات ل بي ؟
16643	الفوته واحد واحد ، من فظلكو.
16653	من وين بقدر اشتري مفارش سفرة؟
16679	ممكن أستأجر دليل بسولف ياباني؟
16696	بدك ياني اوخذلك صورة؟
16709	ما كان عندي هاظا الصحن.
16718	انجرح اصبعي. في سبيرتو؟
16723	بتقدر تعطيني طابع بتسعة وتسعين سنتا؟
16736	رح أكون هون الساعة ثمانية إلا ربع.
16746	بدي عطر.
16747	أعطيني جدول المواعيد؟
16751	رح تروح عالمدرسة هون؟
16758	قديش كان حقها ؟
16760	فندق الهيلتون بعيد من هون؟
16769	أنا متأكد إني حطيتها بمحفظة الوراق تاعيتي .
16770	ارفعوا إيديكو
16771	في مطعم بتنصح فيه قريب من هون؟
16773	شو بتحب أكثر, غامق أو فاتح؟
16781	بتقدر تحكيلي وين بطير الطيارة هسا؟
16793	تذكرة نزول وطلوع طيارة ثانية لو سمحت.
16796	وين بلاقي مكان لطيف أظل فيه رحلة ليوم واحد؟
16799	بدي شنتة كيلي حمرا مثل هاذ الموديل.
16805	هل رح تظل جدول المواعيد شغّالة؟
16810	أميت بفتح البنك؟
16811	بحس بالتعب.
16819	رح أرتبك. ما عندك مشكلة ترسملي خريطة؟
16822	برا.
16829	خذني على المستشفى.
16833	لازم آجي على المستشفى كل يوم؟
16837	بطني بوجعني.
16839	قديش بده البريد مصاري عشان أرسل هالرسالة لليابان؟
16842	بدي قنينة من الشيري الأسباني.
16869	بدك حدا يجي يوخذك من المطار؟
16872	رح يبلش الصعود على الطيارة الساعة أربعة ونص . لذالك لو سمحتو كونو هون قبل هذا الوقت.
16878	من ثلاثين ألف ين.
16879	من وين بقدر اشتري كرت تلفون؟
16888	بقدر أرجعها بمدينة ثانية؟
16889	بخطط أظل اثنعشر يوم.
16893	من فضلك خلي الجزء الفوقاني أطول شوي.
16896	بتحتاج تشوف دكتور متخصص.
16899	كم دقيقة كمان اذا سمحت.
16904	طريق رقم اربعطش.
16911	أها، عندك؟ طبعا إنت عندك تشكيلة كبيرة.
16928	مش قادر ألاقيها بأي مكان.
16936	عندك اي كراسي فاظية لندن؟
16952	بدي نسخة من تقرير السرقة.
16955	هيه على بُعد ناصية وحدة بالشارع.
16960	بتقدر تعطيني إشارة بالضو لما تكون فيها؟
16962	هاي السقاير معتدلة؟
16964	طيب. زي هاي بس.
16967	راح يجي القطار السريع الجاي بعد ساعة.
16976	بدي اعمل اكمام هالجاكيت الرياضي طويلة.
16992	عندي حجز. هاظ هو رقم تأكيد الحجز.
17027	عيد ميلادك قرب.
17030	وقفت القطارات عشان الإضراب.
17038	بتقدر تصلح هاي؟
17068	كان الشارع مليان سيارات.
17079	البناية الثانية على يسار البناية البيضا.
17094	حجزنا مقعد لخمسة و عشرين من شهر عشرة الساعة احدعش الصبح.
17097	لا. شوي لقدام. هناك، إيوه.
17115	أيوة، هاذ ما بشمل الأكل.
17117	وين بقدر ارجّع حق هالتذكرة؟
17120	ليش بصير هاذ ؟
17149	بدي أوخذ بريك.
17158	سيارتي خربت. تعال خذها لو سمحت.
17163	بدي شعري يكون طويل شوي ورا راسي.
17177	شو الأنواع اللي عندكم؟
17179	موافق. هاذ واحد من احلا الاماكن عندي.
17180	شو نوع النموذج اللي بتفكر فيه؟
17204	اسمي ميتشكو تاناكا، ورقم الرحلة لطوكيو هو خمسة، صفر، واحد.
17216	من فضلك، بتقدر ترسملي خريطة سهلة من هون؟
17217	وين بدنا نتلاقى؟
17222	بدي أعمل شعري زي ما كان قبل.
17229	اعطيني خمسين ، إذا سمحت.
17272	وين بقدر أعمل إجراءات الدخول للخطوط الجوية اليابانية ؟
17280	شو المكونات؟
17295	في أماكن بالمنطقة بتجيب تزكية كثيرة؟
17311	لو سمحت اعطيني شوية فراطة.
17313	طيب . راح أتأكد إنه الشناتي رح تكون هون.
17315	هاذ طبقنا الخاص, سمك موسى المشوي الخاص بدوفر.
17339	راح نظل.
17350	انسرقت .
17356	ماشي. لازم أساويها مركزة؟
17381	رح نتقاسم.
17394	ما عنا نفس النوع حالياً. رح أشوف المخزن عنا. استنى دقيقة إذا سمحت.
17398	ويسكي اسكتلاندي ومية لو سمحت.
17399	هاذ مبين بجنن. كم سعره ؟
17414	خذ هالوصفة الطبية للصيدلية. بتقدر توخد الدوا من هنيك.
17438	طلبت هاظ.
17453	أيوة, بتقدر توقف بأي محطة مابين هون وشيكاغو.
17460	منين بقدر أشتري شوية هدايا تذكارية ؟
17475	هي غالية كثير . ما بقدر عمشتراها
17482	بقدر آخذ رقم تليفون إيه بي سي والشركة في شيكاغو لو سمحت؟
17488	وين الكنيسة الكبيرة؟
17496	كيف بتحب توكل البيض؟
17504	هو جنب هاذ المبنى بالتحديد .
17526	لا, بظنهم نسيوا يجيبولنا وحدة.
17537	ماشي، اتأكدت . بنقدر نوخذ رقمك تلفونك في حال احتجنا نتصل فيك؟
17548	شو اسم الرسام؟
17559	بتحب أخليه يرجع يرنلك بس يرجع؟
17593	بدي آخذ هاظا.
17606	بحب هاي خدمة توزيع شامبانيا للترحيب بعد ما نطير. خليني أشرب بصحتك.
17609	أربعين دولار كل يوم، مع زيادة ثمنية سنت عكل ميل.
17615	براهن بخمس دولارات .
17636	هاظا طلب واحد ثاني؟
17645	قلتلي كيف بروح على المتحف؟
17649	آسف كثير، بس بدي أجل الموعد .
17652	هل اخترتلي رحلة قصيرة؟
17660	رح يطلع قطارك من السكة رقم ثمانية.
17673	بدور على شنتة فيها قشاط مش ثابت .
17674	بدي ياها تظل تحت المية وثمانين دولر.
17739	راح أمشي بعد ما أتفقد هون وهناك.
17745	ايوه، حجز لست أيام لو سمحت، ببلش من ثلاث وعشرين ستة.
17757	ممكن توريني شغلات ثانية بأشكال غير؟
17765	شو نوع العصير اللي بتحبه ؟
17780	راح ترجع على بلدك بالعطل؟
17782	وين بقدر اروح عشان اشوف منظر بجنن فعلا؟
17786	كان هاذ مكسور فعلاً لما فتحت الطرد.
17790	تسعه وعشرين من آب.
17797	بدي أودي هاي لليابان بالبريد الجوي.
17798	عيد الشكر و العمال، يوم الشكر لكل الناس اللي ساعدوا المجتمع بشغلهم.
17799	هاي الغرفة صغيرة كثير.
17803	بقدر آخذ كمان شاي، لو سمحت؟
17805	بدي أغسل وعيتي بوقت ثاني اليوم.
17808	في بنك قريب من هون؟
17811	ممكن تنظف الطاولة، لو سمحت؟
17840	سكينة، لو سمحت.
17841	هاي كلها مطبوعات.
17842	من فضلك ، اكتب رقم الغرفة بقفى الورقة.
17847	بنستعمل العيدان لما بنوكل.
17852	رحلة الطيارة دلتا رقم ثمانية وعشرين اللي رايحة على نيو أورلينز حتى تتأخر حوالي ساعة.
17854	لما أرجع مرة ثانية لليابان، رح أكتب رسالة. وإذا كان عندك وقت، تكرم ابعثلي انا رسالة.
17855	نسيت تذكرة الطيارة قيتي بالفندق.
17861	غرفة مفردة بدون دش لو سمحت .
17869	بشكرك مرة ثانية عشان ذكرتني. بروح كثير من الناس تنسى توقع ع أسمائهم ولا شو؟
17886	طيب . ما عنا وقت . منقدر نكمل هاي المناقشة يوم الخميس الساعة وحدة ؟
17899	بدي بيجامات.
17919	ماشي. راح أتصل فيك لما يكونو جاهزين.
17935	شو عن الغدا؟
17947	الليموزين رح توقف عند البوابة الشمالية أول شي.
17963	لمتى بظل مطعم الفندق مفتوح حتى أقعد فيه؟
17966	هاذ القطار مباشر؟
17977	ماشي, الوقت صار متأخر شوي. بظن انو لازم اروّح هسا. كتير شكرا على الليلة الممتعة.
17986	ممكن آخذ شوية دوا للوجع بمعدتي؟
18003	بدي اوكل جاج مشوي.
18018	هاي غلطتي. مش غلطتك.
18036	عفواً, متى بخلص هذ الفلم؟
18040	هاظ ، لو سمحت.
18077	سرقوا صيغتي . لازم أقدم شكوى.
18103	لحظة بس، لو سمحت. راح أشبكك مع الأستاذ جونز.
18110	مرحبا . هاي هي الخطوط الجوية المتحدة .
18131	وين السيد جونز تعلّم اللغة اليابانية؟
18138	عندي وحدة صغيرة من نفس التصميم.
18155	ممكن تصفط هالبناطيل؟
18161	مسا الجمعة, عالتسعة.
18166	هاي البوابة لـ لاس فيجاس؟
18181	عندك باص من المطار؟
18189	معلقة ثانية, لو سمحت.
18211	هي شوي مالحة، بس بحبها. جبتها معك من اليابان طول الطريق؟
18226	لو سمحت دزها , إذا بصير
18254	بصير تدفع عشرة دولارات للمقدم؟
18264	أيوة . صحيني من النوم بعد ثلاث ساعات, لو سمحت.
18273	بدي أطلب , بعد إذنك.
18274	لازم اجاوب بـ اه أو بـ لأ ؟
18282	معلقتين , لو سمحت.
18323	شو هي المحطة الجاية ؟
18334	السيارة بطلع صوت غريب وعالي.
18336	متى بيسكر مكتب البريد ؟
18338	دفعت قبل هيك خمسين دولار عربون لما سجلت بياناتي بالفندق.
18341	أخذت دوا للمعدة؟
18342	بحتاج ألبس كبوت و قرافة؟
18344	ممكن احول مصاري لحساب التوفير تاعي؟
18355	نسيت آخذ شنتة الإيد.
18382	بدي أكد مرة ثانية على حجز الرحلة.
18401	ساعتي. كانت ساعة ديجيتال من ماركة سويسرية جديدة.
18409	عديت الامتحان بنجاح كبير .
18412	بدي اياك توخذني معك على بعض الأماكن الحلوة. أنا سايح, إنت بتعرف.
18419	بقدر أروح اشوف المناظر لما السفينة تكون راسية بالمينا؟
18437	أحسن شي تزبط المراية الخلفية.
18440	رح تستني حوالي عشر دقايق أو هيك شي.
18441	ممكن آخذ صحونك؟
18451	رح اكون مبسوط لهالشي. متى بدك ياه؟
18487	بظن اني تركت كميرتي و روحت لما كنت اكل هون امبارح عالعشا.
18492	جمعهم عند البوابة.
18502	أوه ، لا . هاذ مش ضروري . أنا بقدر أدبر بالموضوع. صراحة أنت سويت أكثر من اللازم.
18519	يا تصلحها يا تبدلها، لو سمحت.
18521	ممكن اعملها اي وقت بالشهر الجاي.
18527	لو سمحت هدي.
18531	كيف بدنا نقارن هاذ المنتج الجديد مع المنتجات اللي عنا؟
18540	موظفين المبيعات بهاذ المحل لطيفين كثير.
18552	ممكن تظبلي هاد؟
18562	ديقة بس، لو سمحت.
18569	عندك انت بطاقات دعوتك؟
18572	حاب أستأجر سيارة لمدة أسبوع.
18580	أيوة, بالأول, غسليها لحالها.
18585	بعد إذنك ورجيني بعض الساعات الرجالي.
18595	هاي أربعطعش.
18612	قديش تكلف الليموزين عشان نروح عوسط البلد؟
18614	من الصبح.
18617	أحسن لو نسرع، همه بالفعل ركبو.
18632	زابطة تماما.
18639	طلبت جاج.
18640	لعشر إيام.
18642	قديش عمر هالولد؟
18643	قديش الكلفة كلها؟
18646	بدي نفس الشي، لو سمحت.
18685	ضيعت الشيكات السياحية تبعتي.
18687	من فظلك عطيني دوا للرشح.
18690	لو سمحت حطها ببوري.
18725	بشوفه دايما كل صبح في القطار.
18727	بتقدر تتعشى معنا الليلة؟
18747	راح أقعد بفندق بي لبكرا. بكون مبسوط لو خبرته إني هون.
18770	الطيارة تأجلت خمسة و أربعين دقيقة.
18771	إسمي شينو يامادا.
18784	بشو متخصص هاذ المطعم
18798	عندنا واين ابيض ممتاز .
18830	بس دوا للفلونزا.
18834	ممكن تنزل أغراضي على الردهة بكرة الصبح؟
18836	أوه، شكلني بضيع اشي كل مرة بسافر فيها.
18845	بطلت أقدر أستخدم إيدي اليمين
18847	مرحبا، هاي لروي؟
18848	بالوقت هاظ، رح تيجي على شارع للتسوق. اذا مشيت هالشارع رح توصل عالمحطة.
18872	لا، مش هون. في غرفة تدخين قريبة بآخر هاذ الباص.
18877	ممكن مرشد سياحي؟
18879	كون هناك على الساعة تسعة، لو سمحت.
18906	أيوة ، يا سيدي . كيف بدك إني أقصها؟
18912	بظن انو في غلط بالفاتورة.
18917	زيت وخل بس رح يكون مليح.
18919	فهمت شو بدك بالضبط. ممكن اقترح هيك؟
18938	قهوة مع سكر.
18948	هي سبعتعشر ايه . اوه ، أني آسف . غلطت
18951	سمعت قبل هيك عن الاسبوع الذهبي باليابان؟
18957	مشكور. يلا جرب مرة ثانية من فضلك.
18963	هو محجوز كله؟
18974	بقدر أسيبها بأي مكان بالبلد؟
18986	شو الرقم اللي بطلب منه هون؟
19002	شلون بقدر أروح على ديزني لاند؟
19005	بتظن هيك؟
19007	عفواً . وين المطعم الرئيسي؟
19009	بدي أتصل بالتيلفون على اليابان.
19036	رقم كرسيي دي اثنعش. وين هو؟
19037	شو هاظ لو سمحت؟
19038	شو النمط اللي بخيالك؟
19045	أها. رح نوصل الساعة ثمنية بالتوقيت المحلي.
19050	لو لقيت إشي، رنلي إذا تكرمت.
19057	ممكن شوية من لحم الخنزير والبيض؟
19064	عصير الشمام كحلو ، لو سمحت.
19068	المية الحامية مش حامية بشكل كافي.
19085	ممكن تشرحلي كيف بشتغل هاذ؟
19094	من فضلك اكتب عنوانك للتواصل معك هون.
19100	ممكن استعمل إشارة ضوئية؟
19101	مشكور، ارجع لغرفتي بنفس الوقت بكرة . الصور رح تكون جاهزة . قبل هيك .
19103	آسف، هسا ما بتقدر تطلب إلا من القائمة الليلية بس.
19113	برصاص ولا بدون رصاص
19144	بحس بصداع.
19147	هاي هي الغرفة اثنعش صفر سبعة.
19148	بدي غرفة ثانية.
19156	كم مدة صلاحية هاي الفيزا ؟
19162	في مستشفى قريب من هون؟
19170	بدي سترة.
19196	عندك حجم أوسع ؟
19215	ممكن أقيس مقاس تسعة ؟
19217	بدي فندق آمن ، بقدم فطور كويس ، لو سمحت ؟
19226	وين حديقة الحيوانات؟
19232	عندك أحجام أكبر؟
19250	ثلاثين دولار وثمانين سنت.
19251	الأمر بتعتمد على حرارة المكان. بس بوسط اليابان, بأول نيسان.
19258	بدي ساندويشة برغر بالجبنة ومقالي.
19269	اخر قطار تأخر كثير.
19281	ما معي فراطة.
19294	اخذت تذكرة الباص؟
19306	الفيزا , لو سمحت.
19307	كنت برحلة يونايتد إيرلاينز الرقم ثمانية اثنين ثمانية.
19317	في ضجة كبيرة حوال غرفتي
19318	على الساحل الشرقي، بتلاقي كمان أمكان معروفة. زي نيويورك, واشنطن, دي دي وبوسطن.
19327	عندك جرايد يابانية؟
19329	هاذ طيب ، من شكله.
19346	بتمانع لو أترك شناتيي عندك لحد الساعة وحدة؟
19347	في رحلة بالبلد؟
19360	أكيد. خايف أنو مجبور على هيك. قديش الأمان مطمن بالمنطقة هاي؟
19391	بفهم هالاشي. بحاول أستأجر سيارة سيتروين.
19401	عندي موهبة طبيعية.
19413	هاذ ممتاز . وين الخبز؟
19415	ركن الشيشانيين، إذا سمحت. وشباك جمب النافذة، إذا سمحت.
19423	قديش بتوخذ بدال التفصيل؟
19444	أي وحدة أسرع: تكسي ولا سيارة الإسعاف؟
19460	عندك الوان ثانية لهاظا التيشيرت؟
19463	لازم ما تتفرج على التلفزيون طول الوقت.
19466	أه، احنا على وشك نعالجه, على وشك نعالجه.
19467	أحسنلك تدخل مستشفانا.
19469	وين بقدر الاقي سوبرماركت؟
19475	هاد كثير غالي. ما فيك تعطيني شوية خصم؟
19479	كم محطة قبل الدوار؟
19490	هذاك الزلمة سرق صرة المصاري تاعتي.
19494	حبوب عسر الهضم بتختلف عن حبوب وجع المعدة، مش هيك؟
19497	بدي اشوف المينا.
19500	فكرة حلوة.
19501	قديش بتوخذ وقت مشي عالجرين؟
19505	راح آخذ عشرين دب لعبة من الحجم الكبير.
19507	شو رقم الصراف؟
19508	الأمور بسيط. رح أشوف بدليل التلفون بس.
19509	عندك غرف أكبر؟
19547	قديش الفاتورة ؟
19548	بدي أظل بهاي الغرفة ليلة ثانية.
19560	معلش، بس بدي أسلم تقرير السرقة.
19572	ماشي، الأمور بتعتمد على الطريقة اللي بتروح فيها. رايح بالباص ولا الطيارة؟
19578	بتمانع لو اقعد هون؟
19581	بقدر أبعث أي ميل واحد تكلفته بس دولر؟
19589	أيوه، لو سمحت وديه على الغرفة اثنعش أربعة وثلاثين.
19610	عبي هاي الاستمارة, لو سمحت.
19617	بدي تذكرتين روحة رجعة على أكسفورد.
19619	متى لازم أكون بالمطار؟
19620	هاي السرعة بطيئة.
19623	وين بقدر أطبع الفلم؟
19643	لا، لو سمحت لا تساوي هيك احتفظ بأسئلتك لبعد ما اخلص حكيي، لما اطلبهن منك.
19648	بدي مقعد زين.
19649	آسف، الحمام فيه عطل. بحتاج للمساعدة.
19651	ما فيه صعوبة أو غموض.
19654	راح اوديك على كرسيك. من هون، لو سمحت.
19656	معلش، بقدر أوجهلك سؤال؟
19666	بظن هيك .
19675	مرحبا. فرصة طيبة.
19691	بدي اتفقد هالشناتي اللي رايحة لطوكيو، لو سمحت.
19694	ممكن توريني سايز اكبر شوي؟
19703	بتوقع انو الأواعي اللي صنعت في اليابان تفصلت بطريقة أحسن أكيد.
19715	أحسنلك تبطل هالاشي.
19716	عيدها، لو سمحت.
19722	ممكن تسجلي العنوان ورقم التلفون عشاني، لو سمحت؟
19726	بيها جهاز تدفئة؟
19732	من أي مطار رح أطلع؟
19733	ما أخذت الاستمارة بالطيارة؟
19735	بدي مكوى.
19752	صار ثمانية وثلاثين دولر كله.
19754	مشكور على ما وضعتلنا ياه من أفكارك الخاصة.
19755	أنا بنزلك مرتين بالشهر طول الموسم.
19760	انولدت بواحد نيسان سنة ألف وتسعمية وخمس وخمسين.
19769	ممكن استأجر مظارب راكيت؟
19809	هاظ هو الباص اللي بوصل لوسط البلد؟
19813	بقديش هاظا العطر؟
19814	شو الهدف منها؟
19819	وين ممكن أساوي الإجراءات الرسمية؟
19838	خمسين قنيه.
19840	هاظ بشمل الضريبة؟
19853	وشو هي المثانة ؟
19862	من فظلك اطلب سيارة إسعاف.
19864	راح أراهن بثلاث دولرات على هاظا.
19871	كيف ماشية الأمور؟
19889	ما في أكل ما بحب أوكله.
19902	عيد الدستور او "كيمبو كينينبي" هو عطلة وطنية بتاريخ ثلاثة خمسة للإحتفال بذكرى الدستور الياباني الحالي.
19912	بتشمل هاي الرحلة زيارة لبرج سيرز؟
19923	في مكتبة بتبيع كتب قريبة؟
19928	رح أداوم بالمدرسة الصيفية بجامعة هاواي.
19935	شو هالمكان اللي بنمر فيه هسا؟
19945	اثنين كبار و ولد عمره ثلاث سنين.
[truncated: 1 more rows]
