# Supplementary material for: Exploring prompting for dialectical machine translation: a focus on north Jordanian Arabic
Source: PeerJ journal article supplement (doi:10.7717/peerj-cs.3209), 2025-11-12
Supplement: IrbidDial_Dictionary.xlsx [file IrbidDial_Dictionary.xlsx]

## Sheet: Sheet1
MSA	Irbid
لحم الرجل	موزة
لم	ما
مادة اللغة الفرنسية	فرنسي
ابتعد	بعد
ابدأ	ببدا
ابدأ	بلش
ابدأ	شغل
ابطأ	شوي شوي
ابغي	بدي
ابغي	حاب
ابق	خليك
اتبعت	مشيت
اتجاه	جهة
اتجاه مستقيم	دغري
اتجه	روح
اتجه	لف
اتخذ	إعمل
اتركه	خليه
اتساءل	بفكر
اتساءل	مستغرب
اتصل	رن
اتصلت	رنيت
اثنا عشر	اثنعش
اثناء	خلال
اثنان	اثنين
اثنتان	ثنتين
اثنتين	ثنتين
اثني عشر	اثنعش
اجتزت	عديت
اجرة	أجار
اجعل	خلي
اجلس	اقعد
اجمع	جمع
احترس	انتبه
احتساء	شرب
احتفظ	خلي
احتياجات	أشياء
احدعش	نوفمبر
احذية	كنادر
احصل	اوخذ
احضر	أجيب
احضر	أداوم
احضر	آجي
احضر	تعال
احضر	جيب
احضر	هات
احفظ	خلي
احمل	شيل
اختبار	امتحان
اختر	إختار
اختيارات	خيارات
اخلع	إشلح
ادخر	احتفظ
ادخل	أفوت
ادخل	دخّل
ادخل	فوت
اذهب	روح
ارتداء	لبس
ارتطم	خبط
ارتفاع	علي
ارتفع	زاد
ارشح	بنصح
ارغب	بدي
ارغب	حاب
اريد	بدي
ازدحام	زحمة
استحمام	حمام
استحمام	سباحة
استخدام	تشغيل
استخدم	استعمل
استخدمها	إستعملها
استدر	لف
استدع	جيب
استدعي	اطلب
استدعي	جيب
استدعي	نادي
استدعي	ناديلي
استرحت	ارتحت
استرداد	أرجع
استرداد	ترجيع
استطلع	أتفرج
استعدت صحتي	طبت
استعيد	ارجّع
استغراقك	أخذت
استقطاع	أستلف
استقل	اركب
استلق	اتمدد
استلقي	تمدد
استمتع	انبسط
استمتع	بنبسط
استمتع	كيّف
استمتعت	كيفت
استمتعنا	كيفنا
استمر	كمل
استمرت	ظلت
استئصال	شيل
اسجل دخول	أنزل
اسم	إسم
اسمي	إسمي
اشتقت	إشتقت
اشجار	شجر
اصلح	صلح
اضغط	اكبس
اطفال	صغار
اطفال	ولاد
اعتاد	تعود
اعتزم	قررت
اعتقادك	رايك
اعتقد	بتوقع
اعتن	اهتم
اعذريني	سامحيني
اعطني	اعطيني
اعطني	هاتلي
افحص	اتفقد
افضل	أحسن
اقترب	قرب
اقترح	بقترح
اقلام	قلام
اكتملت	خلصت
الاختلاف	الفرق
الاسترداد	الترجيع
الإضاءة	الضو
الإضافية	الزيادة
الأحمر	لحمر
الأقدام	الجرين
الأكمام	الكمام
الأمر	الشغلة
الأمر	الموضوع
الأمر	الوضع
الأيسر	اليسار
الآخر	الثاني
الآخرين	الناس
الآن	حاليا
الآن	هسا
التالي	الجاي
التخفيض	الخصم
التفضل	الرجاء
التقطت	أخذت
التكلفة	الحساب
التي	اللي
الثانية	ثنتين
الجميع	الكل
الحافلات	الباصات
الحصول	أحصّل
الحمراء	الحمرا
الخارج	برا
الخاص	المميز
الخاص	تاع
الخاص	تبع
الخاص ب	تاع
الخاص بك	تاعك
الخاص بي	تاعي
الخاص بي	تبعي
الخاصة	اللي
الخاصة	تبعت
الخاصة بك	تاعيتك
الخاصة بي	تاعيتي
الخاصة بي	تبعتي
الخاصة بي	قيتي
الدخول	الفوته
الدور	الطابق
الدولارات	دولرات
الذي	اللي
السوستة	السحاب
السيد	الاستاذ
السيدات	الستات
السيدة	الست
الشديدة	القوية
الشيال	العامل
الصحيح	الصح
الطازج	طازا
الطبيب	الدكتور
الطعام	الأكل
الطقس	الجو
العالم	الدينا
العشاء	العشا
العظمى	الكبيرة
العمل	الشغل
الغد	بكرة
القادم	الجاي
القادمة	الجاية
القسيمة	الوصل
القصة	السولافة
الكرة	الطابة
اللعنة	يلعن
الماضي	زمان
المائدة	السفرة
المتجهة	رايحة
المحتوي	اللي فيه
المحطة	الموقف
المدينة	البلد
المرور	السير
المزيد	اكثر
المزيد	زيادة
المزيد	كمان
المساء	الليل
المساء	الليلة
المسار	الطريق
المظروف	الظرف
المعطف	الكبوت
المعياد	الموعد
المفقود	الضايع
المقاس	الحجم
المقبل	الجاي
المقبلة	الجاية
المقعد	الكرسي
المميز	الخاص
المناخ	الجو
المنزل	الدار
المنضدة	الطاولة
النافذة	الشباك
الواحدة	وحدة
الوقت	الساعة
اليد	الإيد
امض	وقع
املأ	تعبي
املأ	عبي
املأ	ملي
انتظر	استنى
انتظرني	استناني
انتقل	روح
انتقلنا	رحلنا
انتم	إنتو
انخرطت	انبلشت
انظر	اتفرج
انظر	شوف
انعطاف	لف
اهبط	إنزل
اهلاً	أهلين
اود	حاب
اين	وين
إبريق	بريق
إبريق	بكرج
إبريق	قربة
إبريل	نيسان
إتصال	تواصل
إتمام	نهاية
إجابة	جواب
إجازات	عطل
إجازة	عطلة
إجازتك	عطلتك
إجراء	اعمل
إجراء مكالمة	أتصل
إجمال	كله
إجمالي	كلها
إجمالي	كلي
إحداها	وحدة
إحدى عشر	إحدعش
إحراق	حرق
إحضار	جيب
إحمر	أحمر
إخبارك	احكيلك
إدارة	لف
إدراج	انحسبت
إدعاء	دعوة
إذاً	لعاد
إذاً	يعني
إذن	لعاد
إذن	معناته
إذن	يعني
إرشادات	تعليمات
إسطوانات مدمجة	سيديات
إصدار	طبع
إصدار	نطلع
إضاءة	إظاءة
إضافي	زيادة
إضافية	ثانية
إضافية	زيادة
إعطني	أعطيني
إعياء	تعب
إفطار	فطور
إلا	غير
إلهي	ربي
إلى	عال
إلى	على
إلى	ل
إلى جانب	غير
إلى هذا الحد	لهالدرجة
إما	يا
إنجلترا	إنقلترا
إنجليزية	إنجليزي
إنفاق	دفع
إننا	إحنا
إنني	أني
إنه	هاذ
إنه	هو
إنها	هاي
إنها	هي
إنهاء	نخلص
إنهم	هظول
إنهم	همه
إياب	رجعة
إيجاد	ألاقي
إيجادها	يلاقوها
إيجار	اسئجار
إيجار	أجار
إيداع	أمانات
إيداعها	وصلت
إيشارب	شال
إيصال	وصل
أبحث	أدور
أبحث	بدور
أبدل	أغير
أبقى	أظل
أبلغه	قله
أبنية	بنايات
أبواب	بواب
أبواب	منافذ
أبوابه	بوابه
أبيت	أبات
أبيض	أبيظ
أتجنب	اتوقى
أتحدث	أحكي
أتحدث	بحكي
أتحقق	اتأكد
أتحقق	أشيك
أتذكر	بتذكر
أتذوق	أذوق
أترجل	أنزل
أتركها	أسيبها
أتزوج	أجوز
أتصل	أرن
أتصل	بحكي
أتعاطه	آخذه
أتعجب	مستغرب
أتقيأ	أراجع
أتلقى	شفت
أتناول	أشرب
أتناول	أوكل
أتناول	آخذ
أتناول	آكل
أتوبيس	باص
أتوجه	أوجه
أتيقظ	صحيت
أثرية	قديمة
أثناء	خلال
أجاب	جاوب
أجد	ألاقي
أجد	لقيت
أجدر	أحسن
أجدها	ألاقيها
أجدها	لقيتها
أجر	أجرة
أجر	تكلفة
أجر	راتب
أجرة	أجار
أجري	أركض
أجري	أعمل
أجعل	أخلي
أجعل	أعمل
أجعل	حط
أجل	اه
أجل	اها
أجل	أكيد
أجل	أها
أجل	أيوه
أجل	نعم
أجلس	أقعد
أجمل	أحلى
أجود	أحسن
أجيب	أجاوب
أحببت	حاب
أحبذ	بحب
أحبك	بحبك
أحبها	بحبها
أحتاج	بدي
أحجام	سايزات
أحد	حا
أحد	حدا
أحد	وحدة
أحد عشر	إحدعشر
أحدق	بسرح
أحذية	بواط
أحذية	كنادر
أحصل	استلم
أحصل	أجيب
أحصل	أحصّل
أحصل	ألاقي
أحصل	أوخذ
أحصل على	بلاقي
أحضر لي	هاتلي
أحضرت	جبت
أحمر	إحمر
أحمر الشفاه	حومرة
أحياناً	مرات
أخبرني	خبرني
أخبرني	قلي
أخبرني	قوللي
أخبره	قله
أخد	اخظ
أخذتني	توخذني
أخرج	أطلع
أخرج	طلع
أخرجته	طلعته
أخرى	ثانية
أخرى	زيادة
أخرى	غير
أخرى	كمان
أخريات	كمان
أخشى	بخاف
أخشى	خايف
أخضر	اخظر
أخطاء	أغلاط
أخطأت	غلطت
أخطئ	بغلط
أخمن	بتوقع
أخمن	بفكر
أداء	أساوي
أداة	شغلة
أدراجنا	ورانا
أدرك	أدري
أدرك	أعرف
أدرك	لحقت
أدري	بعرف
أدعوك	اعزمك
أدفأ	أدفى
أدنى	أقل
أدوات	أغراض
أدوات	أغراظ
أديرها	ألفها
أذذهب	أروح
أذكر	أتذكر
أذهب	اروح
أذهب	أروح
أذهب	بروح
أراحني	ريحني
أراك	بشوفك
أراه	بشوفه
أراها	أشوفها
أربعاء	أربعا
أربعة عشر	اربعطعش
أربعون	أربعين
أربعينات	أربعينيات
أرتدي	ألبس
أرتقي	أطلع
أرجاء	حوالين
أرجو	بتمنى
أرحل	اروح
أرز	رز
أرسل	أبعث
أرسل	أودي
أرسل	ودي
أرسله	وديه
أرشح	برشح
أرشدتني	ادلني
أرشدتني	تدلني
أرضية	أرض
أرعاه	أربيه
أرغب	بدي
أرغب	حاب
أرقت	كبيت
أركنها	أصفها
أرن	أرن
أرني	فرجيني
أرني	ورجيني
أرني	وريني
أرى	أشوف
أريتني	تفرجيني
أريتني	توريني
أريد	بدي
أريد	حاب
أريك	أورجيك
أريك	أوريك
أزرار	كبسات
أزرق	إزرق
أزكي	بنصح
أزور	أروح
أزيل	أشيل
أساسي	أصلي
أساسية	ضرورية
أساعدك	أخدمك
أستاذ	إستاذ
أستاذة	آنسة
أستبدل	أصرف
أستدعيك	أناديك
أسترخي	اتمدد
أستطع	قدرت
أستطيع	بقدر
أستطيع	قادر
أستطيع	قدرت
أستعيد	آخذ
أستعير	استقرض
أستقل	اركب
أستقل	أطلع
أستقل	آخذ
أستقلها	اركبها
أستمع	أسمع
أسرة	عيلة
أسرتك	عيلتك
أسرع	سرّع
أسرع	طير
أسرع	عجّل
أسفل	تحت
أسفل	سفل
أسلك	أمشي
أسناني	سناني
أشاهد	اشوف
أشاهد	أتفرج
أشاهد	أحظر
أشد	أكثر
أشعر	بحس
أشعر	حاس
أشغل	اولع
أشهر	شهور
أشياء	شغلات
أصبح	أصير
أصبح	صار
أصبحوا	صاروا
أصدر	أطلع
أصدر	طلع
أصدقاء	رفقة
أصدقائي	صحابي
أصطحب	أوخذ
أصطحب	آخذ
أصطحبك	أوديك
أصعد	أطلع
أصفف	أعمل
أصل	أوصل
أصناف	أنواع
أصنع	أعمل
أصيب	انصاب
أصيب	صار
أضاف	زاد
أضرحة	قبور
أضطر	بظطر
أضع	أحط
أضعت	ظيعت
أضعها	أحطها
أضيق	أقيف
أطباق	أكلات
أطباق	صحون
أطباق	وجبات
أطلب	أتصل
أطلع	أشوف
أطلعت	تشوف
أطلعك	اخبرك
أظن	بتوقع
أظهر	بين
أظهرها	طلعها
أعاقبك	أورجيك
أعبر	بتقطع
أعتقد	أظن
أعتقد	بتوقع
أعتقد	بظن
أعتني	اهتم
أعتني	أدبر
أعثر	ألاقيه
أعد	أعمل
أعد	عيد
أعضاء	أعظاء
أعط	إعطي
أعطني	إنطيني
أعطني	أعطيني
أعطني	عطيني
أعطه	إعمله
أعطياني	أعطوني
أعطيتني	إنطيتني
أعطيتني	ناولني
أعقد	أعمل
أعلم	بعرف
أعلن	بعلن
أعلى	فوق
أعمدة	عمدان
أعمل	بشتغل
أعواد	عيدان
أعوام	سنين
أعود	أرجع
أعيد	ارجع
أعيده	أرجعه
أعيدها	أرجعها
أعيش	ساكن
أغادر	أروّح
أغادر	أطلع
أغسطس	آب
أغلق	أسكر
أغلق	تسكر
أغلقت	سكرت
أغير	أبدل
أفحص	أشوف
أفحص	أشيك
أفرق	بفرق
أفضل	أحسن
أفضل	أحلى
أفضل	أهم
أفضل	بفظل
أفعل	أساوي
أفعل	أعمل
أفهم	بفهم
أفهم	فاهم
أقاربنا	قرايبنا
أقداح	كاسات
أقدامك	إجريك
أقدر	بحترم
أقدر	ممنون
أقدم	أضيف
أقراص	حبوب
أقص	أقصر
أقصى	أكبر
أقصى سرعة	أسرع
أقضي	أظل
أقطعها	أقصها
أقفاص	صناديق
أقل غلاء	أرخص
أقلعت	طلعت
أقم	عملت
أقود	بسوق
أقول	أحكي
أقوم	أساويها
أقوم	أعمل
أقوم	بعمل
أقيم	اسكن
أقيم	أقعد
أقيم	قاعد
أكتوبر	عشرة
أكثر	زيادة
أكثر شعبية	مشهورة
أكل	طبق
أكمام	كمام
أكمل	كمّل
ألا	ما
ألتقط	اوخذ
ألفه	بيعرفه
ألقاك	بشوفك
ألقي نظرة	أشوف
ألم	وجع
أليس	ما
أليس	مش
أليس كذلك	صح
أليست	مش
أم	ولا
أمارس	ألعب
أمام	قدام
أمامي	أول
أمة	شعب
أمتعة	اغراض
أمتعة	شناتي
أمتعة	شنتات
أمتعتك	شناتيك
أمتعتي	اغراضي
أمتعتي	اغراظي
أمتعتي	شنطي
أمتلك	معي
أمر	شغلة
أمر	قصة
أمر	موضوع
أمس	امبارح
أمس	مبارح
أمسية	ليلة
أمضيناه	قضيناه
أمطار	شتا
أمعن التفكير	أصفن
أمكث	أظل
أملأ	أعبي
أملس	ملسة
أملئ	بعبي
أموال	مصاري
أن	إنه
أنت	إنت
أنتظر	أستنى
أنتقل	أروح
أنتهي	أخلص
أنزلتني	تنزلني
أنزلني	نزلني
أنظر	أشوف
أنظم	أرتب
أنفق	أصرف
أنفقت	صرفت
أنقص	اقلل
أنقل	أحول
أننا	إنّا
أنني	إني
أنها	هاي
أنوي	ناوي
أنيق	لايق
أهيئ	أشغل
أو	ولا
أواجه	ألاقي
أواصل	أكمل
أوافق	موافق
أوبرا	أوبيرا
أوتوماتيكية	أوتوماتيك
أود	بدي
أود	حاب
أودع	حط
أودعته	تركته
أوصلك	أشبكك
أوقف	الغي
أول	واحد
أوه	ييه
أؤجر	استأجر
أي	أيّا
أي	شو
أي	كل
أيام	إيام
أيس كريم	بوزة
أيضا	كمان
أيضاً	برضه
أيقظني	صحيني
أيمكنك	بتقدر
أيمن	يمين
أين	من وين
أين	وين
أيهما	أي وحدة
أيهما	مين
آتي	آجي
آتي	بآجي
آخذ	أوخذ
آخذك	أوديك
آخذكِ	أوديكي
آخر	ثاني
آخرين	ثانيات
آلة تهوية	مروحة
آلة كاتبة	طابعة
آيس كريم	بوزا
باجر	بكرة
بادئ	أول
باستثناء	ما عيدا
باستخدام	عن طريق
باكر	بكير
بالتاكيد	أكيد
بالتأكيد	طبعاً
بالحقيقة	صراحة
بالداخل	جوا
بالزبط	بعينه
بالضبط	بالزبط
بالطبع	طبعاً
بالغان	كبار
بالفعل	فعلاً
بالفعل	فعلياً
بالقرب	جنب
بالقرب	قريب
بالكامل	علأخير
بالكامل	كله
بالمائة	بالمية
باهظ	غالي
بإمكاني	بقدر
بأس	مشكلة
بأسناني	بسناني
ببطء	شوي شوي
بتحث	بتشجع
بتفضله	بتحبه
بجوار	جنب
بجوار	عند
بجواري	بحدي
بحاجة	بتحتاج
بحاجة	لازم
بحالة جيدة	تمام
بحالة جيدة	طيب
بحالة جيدة	مليح
بحثت	أدور
بخطط	بفكر
بداخلها	جواتها
بدأ	بلش
بدأت	بديت
بدل	اصرف
بدل	بدال
بدل	غير
بدلت	اتبدل
بدون	بلا
بدين	ناصح
بذلة	بدلة
بذلك	هيك
برايز	أباريز
برتقال	بردقان
برثية	رسالة
برجر	برقر
برد	رشح
برطمان	قطرميز
برقية	رسالة
برهة	شوي
بريد	صفحة
بزة	سترة
بزتك	سترتك
بسبب	عشان
بسهولة	ببساطة
بسيطة	سهلة
بشدة	كثير
بشكل جيد	مليح
بضائع	بظايع
بضعة	كم
بطاطس	بطاطا
بطاقات	كروت
بطاقات بريدية	رسائل
بطاقة	كرت
بطاقة	ورقة
بطاقة بريدية	رسالة
بطانية	حرام
بعد الآن	من هون وطالع
بعض	شوي
بعض	شوية
بعض	نتفة
بعناية	بدقة
بعينه	معين
بغادر	بطلع
بفرديهما	لحالهم
بقدر	أستطيع
بقشيش	بخشيش
بك	فيك
بكاء	عياط
بكم	فيكم
بلاد	بلد
بلاغ	شكوى
بلاغ	مذكرة
بلدة	مدينة
بما يكفي	كفاية
بمجرد	بس
بمقدورك	بإمكانك
بنزين	بانزين
بنفسك	لحالك
به	فيه
بها	بيها
بهلوان	مهرج
بهم	فيهم
بواب	شغيل
بواسطة	بسبب
بوليصة	وثيقة
بي	فيّ
بياضات	شراشف
بيان	استلام
بيت	دار
بيد	بس
بيرة	بيرا
بيضاء	بيضا
بيضاء	بيظا
بيعت	انباعت
تُرى	يا ترى
تاسعة	تسعة
تاكسي	تكسي
تائه	تايه
تائه	ضايع
تأت	تيجي
تأتي	بتصل
تأتي	بتيجي
تأتي	تيجي
تأجير	أجار
تأخذ	بتقبل
تأخذ	توخذ
تأخذني	توديني
تأسيس	فتح
تأكل	توكل
تبحث	ادور
تبحث	بدّور
تبدأ	بتبلش
تبدأ	تبدا
تبدلوا	تصرفوا
تبدو	بتبين
تبدو	شكلك
تبدو	شكلها
تبدو	مبين
تبديل	بدل
تبغي	بتحب
تبقى	تظل
تبقى	ظل
تبلغ	توصل
تبلغ	طلعت
تبلغ رسوم	تكلف
تبللت	انبليت
تتابع	بتابع
تتاح	تصح
تتجه	رايحة
تتحدث	بتسولف
تتحدث	تحكي
تتحقق	تتأكد
تتدلى	تنزل
تتسع	توسع
تتطلع	متحمس
تتفضل	تتكرم
تتقاضى	بتوخذ
تتقاضى	توخذ
تتلق	اخذت
تتلقاها	توصلك
تتلقى	تستقبل
تتم	بتصير
تتمتع	تستمتع
تتناول	توكل
تتهجي	بتنلفظ
تتوقف	توقف
تتيقن	تتأكد
تثملني	يسكرني
تثير	بتخليني
تثير	بتلفت
تجد	تلاقي
تجده	تلاقيه
تجري	تعمل
تجعل	بتخلي
تجلب	تجيب
تجهيز	جهزتوا
تجولت	طشيت
تحب	بتحب
تحب	بدك
تحتاج	بدك
تحتسي	تشرب
تحتفظ	تخبي
تحتفظ	تظب
تحتفظوا	تخلو
تحدث	احكي
تحدثت	تسوبف
تحصل	توخذ
تحضر	تجيب
تحضر لي	تجيبلي
تحقق	اتأكد
تحقق	شيك
تحققت	تأكدت
تحلق	بطير
تحملت	تورطت
تحويل	دوار
تحية	ترحيب
تخبرنا	تحكيلنا
تخبرني	تحكيلي
تخبرني	تقلي
تختار	تنقي
تخرج	تطلع
تخص	خصيت
تخطر	تبلغ
تخطط	تنوي
تخطط	ناوي
تخفض	تنزل
تخفض سعرها	ترخصها
تخفيضات	خصومات
تخلص	كب
تخلع	تقلع
تدلني	ادلني
تدون	تكتب
تذكرة	وصفة
تذكرتان	تذكرتين
تذهب	تروح
تذهب	تيجي
ترتب	تصفط
ترتدي	بتلبسي
ترتدي	تلبس
ترتدي	لابسة
ترتديه	لابسيته
ترتفع	تطلع
ترسل	تودت
ترسل	تودي
ترسلها	تبعثها
ترسلها	توديها
ترسلهم	تبعثهم
ترسلوها	تودوها
ترسيخ	تاكيد
ترشح	تقترح
ترشدني	ادلني
ترغب	بدك
ترغب	حاب
ترفع	تعلي
ترقيتك	رفعوك
تركب	تحط
تركت	خليت
تركت	سبت
تركته	سبته
تركل	تشوط
ترني	توريني
تروى	هدّي
ترى	بتشوف
تري	شايفة
تريد	بدك
تريدها	بتحبها
تريني	تفرجيني
تريني	تورجيني
تريني	توريني
تزال	تظل
تزكي	تنصح
تزلج	تزحلق
تزن	توزن
تزور	بيزورو
تزيد	بتزيد
تسببت	سوت
تستبدل	تبدل
تستبدلها	تبدلها
تستحق	بتستاهل
تستحق	بتسوى
تستحق	تستاهل
تستحوذ	بتسيطر
تستخدم	بتستعمل
تستدعي	تجيب
تستدعي	تنادي
تستريح	ترتاح
تستطيع	بتقدر
تستغرق	بتوخذ
تستغرق	بدها
تستغرق	توخذ
تستقل	تطلع
تستمر	تظل
تسدد	تدفع
تسري	بتظل
تسعة عشر	تسعطعش
تسوق	سوق
تسير	تتحرك
تسير	ماشية
تشذب	ترتب
تشعر	بتحس
تشمل	شاملة
تصبح	تصير
تصحبني	توخذني
تصدر	إطلع
تصدر	بطلع
تصدر	تطلع
تصريح	إذن
تصف	تشرح
تصل	توصل
تصلح	اتصلح
تصميم	شكل
تصميمات	أشكال
تضبط	تزبط
تضضري	جبتي
تضطر	تظطر
تضع	تحط
تضع	تركب
تضغط	تظغط
تضغط	تكبس
تضم	شاملة
تضيف	تظيف
تطلب منه	تخليه
تطلق النار	اطخ
تطيل	اطول
تظهر	تبين
تعاقب	بروح
تعالى	تعال
تعبر	تقطع
تعتقد	شايف
تعتني	تنتبه
تعثر	وقع
تعثروا	تلاقوا
تعجبني	عاجبيتني
تعدني	توعدني
تعريفة	تذكرة
تعزم	ناوي
تعطلت	خربت
تعطني	تنطيني
تعطي	تنطي
تعكس	بتبين
تعلم	بتعرف
تعمل	تشتغل
تعمل	شغالة
تعملون	بتشتغلوا
تعني	قصدك
تعنيها	قصدها
تعهدت	وعدت
تعود	ترجع
تعويضي	تعوظني
تعيد	ترجع
تعيدني	ترجعني
تعيدون	ترجعوا
تعيش	عايش
تغادر	بتطلع
تغادر	تطلع
تغادر	رايح
تغلف	تلف
تغلقون	بتسكروا
تغير	أصرف
تغير	بتصرف
تغير	تبدل
تغير	تحول
تغير	تصرف
تغير العملة	صرافة
تغيير	نعدل
تفاصيل	تفصيل
تفتحون	بتفتحوا
تفحص	تشوف
تفحص	تشيك
تفرض	تنفرظ
تفصل	توضح
تفضل	أخذ
تفضل	بتحب
تفضل	تفظل
تفضلها	بتحبها
تفعل	بتساوي
تفعل	تعمل
تفعلوا	تعملوا
تقاضى	أخذ
تقام	بتبلش
تقبض	تمسك
تقبل	توخذ
تقترح	تدلني
تقديري	تقريبي
تقديم	توزيع
تقرأ	تقرى
تقرضني	تعيرني
تقريباً	بحدود
تقرير	بلاغ
تقرير	نشرة
تقسيم	تقسم
تقفل	تسكر
تقلب	تغير
تقلع	تطلع
تقلق	تخاف
تقليدي	شعبي
تقليدية	تراثية
تقول	تحكي
تقول لي	تقلي
تقوم	تعمل
تقيم	تظل
تقيم	تعمل
تقيم	قاعد
تكرار	انعاد
تكرر	تعيد
تكف	تبطل
تكلم	احكي
تلاحظ	شايف
تلائم	تناسب
تلفت	خربن
تلفون عملة	كبينة
تلقى	بتجيب
تلك	هاي
تلك	هذيك
تلمح له	قصدك
تليفون	تلفون
تم	صار
تماما	بالزبط
تماماً	كثير
تمتع	استمتع
تمتعت	انبسطت
تمزح	بمتزح
تملأ	تعبي
تملأها	تعبيها
تمنح	بعطوا
تمنحني	تعطيني
تناسب	بتليق
تناول	أخذ
تناول	أشرب
تناولت	أخذت
تناولت	أكلت
تناولنا	بنوكل
تنتظر	تستنى
تنتقل	تروح
تنتهي	بتخلص
تنتهي	تخلص
تندة	مظلة
تنضم	تشترك
تنضم	تيجي
تنظر	تشوف
تنظيف	غسيل
تنقضي	تخلص
تنقل	بتودي
تنهي	تخلص
تهجى	هجي
تهدأ	تروق
تهذب	تحلق
تواً	هسا
توابل	بهارات
توجد	في
توجهنا	تدلنا
تود	بدك
توصي	بتنصحني
توصي	تنصح
توصي	تنصحني
توضح	تشرح
توضيب	ترتيب
توقظني	تصحيني
توقف	وقّف
توقف	وقف
توليت	تكفلت
تؤخر	بتأخر
تؤلمني	بتألمني
تؤلمني	بتوجعني
ثالث عشر	ثلطعش
ثامنة	ثمانية
ثامنة	ثمنية
ثانية	ثنتين
ثانية عشرة	إثنعش
ثلاث	ثلث
ثلاثون	ثلثين
ثم	بعدين
ثمان	ثمن
ثمانية	ثمن
ثمانية	ثمنية
ثمة	أي
ثمة	في
ثمن	تكلفة
ثمن	حق
ثمنها	حقها
ثمنها	سعرها
ثمين	غالي
ثوب	فسطان
ثياب	أواعي
جاءت	اجت
جادة	شارع
جالون	قلن
جانب	جنب
جانب	جهة
جانبها	جمبها
جانبين	جهتين
جائعون	جيعانين
جبن	جبنة
جدا	كثير
جرعة	مرة
جرى	ركظ
جزاء	جزا
جزار	لحام
جزيل	كل
جزيلا	كثير
جسم	حجم
جغرافيا	تظاريس
جلد	بشرة
جلس	قعد
جما	كثير
جميعهم	كلهم
جميل	حلو
جميلات	بسطلن
جميلة	حلوة
جنيه	قنيه
جواً	بالطيارة
جوار	جنب
جولة	دورة
جولة	لفة
جونلات	تنانير
جيب	جيبة
جيد	تمام
جيد	رايق
جيد	طيب
جيد	كويس
جيد	مرتب
جيد	مليح
جيدة	حلوة
جيدة	مليحة
جئت	جيت
حاجيات	حاجات
حاد	قوي
حادية عشر	إحدعش
حار	حامي
حار	نار
حاصل	معي
حافظة	جزداني
حافظة	محفظة
حافظة نقود	محفظة
حافلات	باصات
حافلة	باص
حال	وضع
حالا	هسا
حاليا	هسا
حامضة	حامظة
حان	صار
حائط	حيط
حائك	خياط
حتى	عشان
حتى	ل
حتى	لحد
حتى	لعند
حجرة	غرفة
حجرتك	غرفتك
حجرتنا	غرفتنا
حجرتي	غرفتي
حدة	لحال
حدث	صار
حدوث	يصير
حديثة	جديدة
حذاء	كندرة
حرر	اكتب
حريمي	ستاتي
حزام	قشاط
حزمت	جهزت
حساء	شوربة
حساس	بتحسس
حسن	تمام
حسن جداً	ممتاز
حسنا	تمام
حسنا	طيب
حسنا	ماشي
حصول	أوخذ
حصيرة	درج
حضرت	اجيت
حفاضات	حفاظات
حفل	حفلة
حفلات الزواج	أعراس
حقا	بصراحة
حقا	جد
حقا	فعلا
حقاً	صح
حقائب	شنتات
حقائب	شنتاتي
حقائبك	شناتيك
حقائبي	شنتاتي
حقبة	فترة
حقيبة	شنتة
حقيبة	شنطة
حقيبتك	شنتك
حقيبتي	شنتي
حقيبتي	شنتيتي
حقيبتين	شنتتين
حقيقة	فعلاً
حلاء	حلو
حلوى	حلو
حمال	عتال
حمام	دش
حمراء	حمرا
حمل	خروف
حمل	شيل
حمى	حرارة
حني	أنزل
حوالي	تقريبا
حول	حوالين
حولنا	حويلانا
حيال	عشان
حين	لما
حينما	لما
حينئذ	بهالوقت
خادم	عامل
خادمة	خدامة
خارج	برا
خارج	طالع
خاص	تاع
خاص بالنساء	ستاتي
خاصة	مميزة
خاطف	حرامي
خاطئ	غلط
خافت	باهت
خال	خالي
خالية	فاظية
خام	أساسية
خامس	خمسة
خامس عشر	خمسطعش
خامسة	خمسة
خبرني	قلي
خدش	شخط
خذ	أخذ
خذ	هاك
خذ	ودي
خذني	أخذني
خذني	وديني
خذها	خظها
خرائط	خرايط
خرج	طلع
خزينة	صندوق
خصوصي	خاص
خصيصا	خصوصي
خضار	خظرة
خضراء	خضرا
خضروات	خضرة
خطاب	رساالة
خطاب	رسالة
خطابات	رسايل
خطأ	غلط
خطأ	غلطة
خطف	سرق
خفض	قلل
خفضها	تنزلها
خلاب	حلو
خلعت	شلحت
خلف	قفى
خلف	ورا
خلف	ورى
خمر	عرق
خمر أبيض	عرق
خمسة عشر	خمسطعش
خمسة عشر	خمسطعشر
داخل	جوا
داكن	غامق
دائم	عطول
دائما	دايما
دجاج	جاج
دخلت	فتت
دخوله	فوته
دراجات	بسكليتات
دراسة	قراية
درجة أولى	الفخم
دش	فوت
دعنا	خلينا
دعنا	يلا
دعني	خليني
دعوة	عزومة
دفع	دز
دقائق	دقايق
دقة	بالزبط
دناءة	وساخة
دواء	دوا
دوار	دوخة
دور	طابق
دورقاً	دورقة
دولار	دولر
دون	سجل
دونت	تكتب
دي جي	ديجيه
ديسمبر	إثنعش
ذات نكهة	طيبة
ذاتها	نفسها
ذاتي	شخصي
ذاك	هاذ
ذاك	هذاك
ذاك	هظاك
ذاهب	رايح
ذاهبة	رايحة
ذراع	إيد
ذلك	هاذ
ذلك	هاظ
ذلك	هذاك
ذلك	هيك
ذهاب	روحة
ذهب	رحت
ذهبت	رحت
ذو	أبو
ذوقي	زوقي
ذوي	أصحاب
ذي	أبو
رابع عشر	أربعطعش
راجع	شيك
رامن	نودل
رائحة	ريحته
رائحته	ريحتة
رائع	بجنن
رائع	حلو
رائع	حلوة
رائع	ممتاز
رائع	مميز
رائعة	روعة
رائعة	ممتعة
رأس	راس
رأسي	راسي
رأيت	شفت
رأيتها	شفتها
رأيك	رايك
ربما	بجوز
ربما	ممكن
ربما	يمكن
رجاءً	يا ريت
رجل	زلمة
رجلي	إجري
رحلة	سفرة
رداء	جاكيت
ردت	رجعت
رزانة	ثقل
رسائل	رسايل
رسم	فلوس
رسم	مصاري
رسومات	رسمات
رشحت	اخترت
رصيف	سكة
رصيف	كورنيش
رطل	كيلو
رقمية	الكترونية
ركلة	تسديدة
ركن	زاوية
ركوب	طلعة
ركوب	طلوع
رواق	صالة
روحة	ذهاب
روشتة	وصفة
روشيتة	الوصفة
روعة	رتابة
ريح	هوا
رئيسي	عام
زائد	زايد
زائد	زيادة
زائدة	زايدة
زائدة	زيادة
زجاج	قزاز
زجاجات	قناني
زجاجة	قنينة
زحام	زحمة
زد	زيد
زر	كبسة
زعاف	قاتل
زلاجات	زحاليق
زلاقات	زلاجات
زلزل	زلزال
زلق	يزحلق
زمام	زمة
زمام	سحاب
زمن	مدة
زوج	جوز
زوجتك	مرتك
زوجتي	مرتي
زوجي	جوزي
س	رح
سَيدي	سِيدي
سابع	سبعة
سابع عشر	سبعطعش
سابعة	سبعة
ساخن	حامي
ساخن	حامية
ساخنة	حامية
سادسة	ستة
ساري	شغال
ساندوا	ساعدوا
ساندوتش	سندويشة
سائحين	سواح
سائحين	سياح
سائر	ماشي
سائرون	ماشيين
سائق	سايق
سبتمبر	تسعة
سبعاً	سبعة
سبيل	طريقة
ستار	برداية
ستة	ست
ستة عشر	سطعش
سترات	جواكيت
ستستغرق	بدها
ستمية	ستمائة
سجائر	دخان
سجائر	سجاير
سجائر	سقاير
سجق	نقانق
سجل	اكتب
سحجة	شخط
سخيف	مسخرة
سر	امشي
سراويل	بنطلونات
سررت	إنسريت
سرق	انسرق
سرقت	انسرقت
سروال	بنطلون
سرير	تخت
سريرين	تختين
سريعاً	بسرعة
سعال	قحة
سعداء	مبسوطين
سعدت	انبسطت
سعر	حق
سعره	بسوى
سعيد	مبسوط
سعيد	مبصوط
سعيدة	هنية
سفح	تحت
سقطت	طاحت
سقطت	وقعت
سكين	سكينة
سلاطة	سلطة
سلب	سرقة
سلك إمداد	وصلة
سلكت	مشيت
سمك الثعبان	انقليس
سن	عمر
سنتيمتر	صانتي
سنحت	صحت
سنوات	سنين
سوستة	زراد
سوستة	سحاب
سوف	راح
سوف	رح
سوى	إلا
سيء	زفت
سيتم	رح
سيد	استاذ
سيدات	ستات
سيدات	نسوان
سيدة	آنسة
سيدة	ست
سيدة	مدام
سيدتي	ستي
سيدي	استاذي
سيدي	إستاذ
سيدي	حجي
سيدي	سِيدي
سيذهب	يروح
سير	مشي
سيرا	تمشاي
سيستغرق	بدها
سيئ	مش مليح
شاب	شب
شابات	صبايا
شابين	شبين
شاربي	شواربي
شاطئ	شط
شاغر	فاضي
شاغرة	فاضية
شامل	كامل
شأن	علاقة
شبان	شباب
شخص	حد
شخص	واحد
شخص ما	حدا
شدة	صعوبة
شديد	قوي
شديد	كثير
شديد الحرارة	شوب
شراب	عصير
شرائها	مشتراها
شربة	شوربة
شرخ	شق
شرفة	برندة
شريحة	قطعة
شريحتين	قطعتين
شطيرة	سندويشة
شطيرتين	سندويشتين
شغلك	عملك
شفاه	شفايف
شقيقة	أخت
شكراً لك	مشكور
شكرا لك	ممنون
شهير	مشهور
شهيرة	معروفة
شوكولاته	شقلاطة
شوي	بعض
شيء	اشي
شيء	شغلة
شيء	شوية
شيء	شي
شيد	عمّر
شيق	حلو
شيقة	حلوة
شيك	شك
شيئاً	إشي
صاخب	عالي
صائبة	صحيحة
صباح	الصبح
صباح	صبح
صباحاً	الصبح
صبي	ولد
صحف	جرايد
صحيح	صح
صحيح	مزبوط
صحيفة	جريدة
صداع	عندي
صدع	شق
صدم	ادحم
صدم	خبط
صديق	رفيق
صديق	صاحب
صديق	صاحبي
صرافون	سمسارين
صرف	تحويل
صعوبات	مشاكل
صعود	طلعة
صغيرة	شوية
صك	ورقة
صلات	واسطات
صلة	علاقة
صناديق	علب
صندوق	طبون
صندوق	كشك
صندوق السيارة	طبون
صنعها	عملها
صنعوا	سووا
صواب	مناسب
صياغة	صيغة
ضائعة	ضايغة
ضائعة	ظايعة
ضباط	ظباط
ضبط	ازبط
ضبط	أظبط
ضبط	زبط
ضبط	ظبط
ضجيج	ضجة
ضخ	ظخ
ضخم	دفش
ضد	ظد
ضرائب	ضرايب
ضرائب	ظرايب
ضروري	ظروري
ضروري	لازم
ضع	حط
ضعه	حطه
ضعها	حطها
ضللت	ضيعت
ضمان	ظمان
ضمنا	معنى
ضهر	ظهر
ضوء	ضو
ضيق	خنقة
ضيقة	ظيقة
طاردتني	لحقتني
طازج	طازا
طاهية	طباخة
طائرة	طيارة
طبق	أكل
طبق	أكلة
طبق	صحن
طبق	مثل
طبقاً	بناءً
طبقين	صحنين
طبيب	دكتور
طراز	موديل
طراز	نوع
طراز	نوعية
طرحت	انبطحت
طرف	جهة
طرق	خطوط
طريق	شارع
طريق مستقيم	دغري
طعام	أكل
طعام	وجبة
طفل	صغير
طفل	ولد
طلاء	دهان
طلاء	مناكير
طلب	طلبية
طليقا	مفرود
طماطم	بندورة
طهي	طبخ
طوال	طول
طوال	طول
طويل	كثير
طويلة	بعيدة
طويلة	رحلة
طيب	زاكي
طيبة	حلوة
ظمآن	عطشان
ظننت	فكرت
ظهيرة	الظهر
ظهيرة	ظهر
عازب	عزابي
عاشر	عشرة
عاشرة	عشرة
عام	حكومي
عام	سنة
عامل	موظف
عائلات	عيل
عبارة	جملة
عثرت	لقيت
عثور	يلتقى
عد	ارجع
عدا	إلا
عدا	عيدا
عدة	كم
عدم	ما
عذرا	معلش
عذراً	عفواً
عربة	عرباية
عرضة	ممكن
عرفتني	تدلني
عريضة	واسعة
عزيزي	حبيبي
عسيرة المضغ	قاسية
عش الغراب	فطر
عشاء	عشا
عصى	عصاة
عصى	عصي
عصيراً	عصير
عطفك	طيبتك
عظيم	مرتب
عظيم	ممتاز
عظيم	وااو
عفوا	معلش
عقار	دوا
علامة	إشارة
علة	مشكلة
علمت	سمعت
علوي	فوقاني
على	ع
على الإطلاق	أبداً
على الموضة	دارج
على انفراد	لحالها
على أي شيء	على شو
على حدا	لحال
على ما يرام	كويس
علي أن	لازم
عليك أن	لازم
عمل	شغل
عملاء	زباين
عملات معدنية	فراطة
عمومي	عام
عند	لما
عندكم	عندكو
عندما	بس
عندما	لما
عندنا	عنا
عندي	علي
عندئذ	بالوقت
عنق	رقبة
عودة	أريد
عودة	رجعة
عودوا	ارجعوا
عينان	عيون
عيناي	عيوني
غادر	طلع
غادرت	روحت
غامق	داكن
غثيان	لعية
غد	بكرا
غد	بكرة
غداء	غدا
غذاء	أكل
غرض	هدف
غرفة استراحة	حمام
غضب	زعل
غضون	خلال
غطس	غوص
غلاء	غلى
غلفها	لفها
غلى حد ما	شوي
غير	اصرف
غير	مش
غير	اصرفلي
غير حلو	بدون سكر
غير مشغول	فاضي
فاتن	بتجنن
فاتني	راح علي
فارغة	فاظية
فارق	فرق
فاكهة	فواكه
فائق السرعة	سريع
فتاة	بنت
فترة	وقت
فترينة	خزانة
فجوة	فتحة
فحسب	بس
فحص	تدقيق
فخذ	فخدة
فر	فل
فراخ	جاج
فرامل	بريكات
فرد	زلمة
فرد	واحد
فردي	لواحد
فردين	شخصين
فساتين	فساطين
فسيح	واسع
فشار	بوشار
فصل	حصة
فضلات	زبالة
فضلك	فظلك
فطرية	طبيعية
فعالة	شغالة
فعلا	صراحة
فعلت	سمحت
فعلت	عملت
فقدت	بطلت
فقدت	ضيعت
فقط	بس
فك	افرط
فكة	صرافة
فكة	فراطة
فكرة	لمحة
فنجانان	فنجانين
فوارق	فرق
فودكا	فوديكا
فوراً	هسا
فوري	دغري
فوط	مماسح
فوطة	ممسحة
في	ب
في	عند
في الأغلب	غالباً
في الحال	عطول
في الحال	مباشرة
في الخارج	برا
في الواقع	فعلاً
في تمام	بالظبط
في تمام	ع
في حالة	إذا
في حيرة	محتار
في غضون	خلال
فيلم	فلم
فيما	بشو
فيما بعد	بعدين
فئة	أبو
فئة	أم
فئة خمسين	خمسينات
قادم	جاي
قادمة	جاية
قادمتان	جايات
قاعة	صالة
قاموا بها	عملوها
قبيل	زي
قدح	فنجان
قدر	شكل
قدمي	إجري
قدميك	جريك
قس	قيس
قسط	شوي
قشدة	قشطة
قشدة	كريمة
قشعريرة	قشعيرية
قصارى	كل
قضاء	أقظي
قضتها	عاشتها
قضية	موضوع
قضيت	قظيت
قضيت	قعدت
قطط	بسس
قطع	انجرح
قطع	مزع
قطعة	شقفة
قطعت	جرحت
قف	وقف
قفاز	كفوف
قلادة	سنسال
قلم	قص
قليل	شوي
قليلا	شوي
قليلا	شوية
قم	اعملها
قمت	سويت
قمع	بوري
قواعد	قوانين
قومية	رسمية
قومية	شعبية
قومية	وطنية
قيادة	سواقة
قيمة	تكلفة
قيمة	حق
قيمته	تكلفته
كادت	راحت
كارت	كرت
كاف	كافي
كاملاً	بالكامل
كاميرا	كمرة
كاميرا	كميرا
كاميراتي	كمرتي
كاميرتي	كميرتي
كأس	كاس
كبار السن	ختايرة
كبرى	كبيرة
كبيرة	واسعة
كتاب	دفتر
كذلك	كمان
كذلك	هيك
كرات	طابات
كرة	طابة
كرم	حسن
كسرت	انكسرت
ككرها	عيدها
كلا	لا
كلام	حكي
كم	قديش
كم	كثير
كم	كو
كم تكلفة	قديش
كم سعر	قديش
كما	زي
كما لو كنت	كإني
كن	كون
كن حذراً	انتبه
كهرباء	كهربا
كهربائي	كهربا
كوب	كاس
كوب	كاسة
كوبان	كاستين
كيتشأب	كتشب
كيس	كمادة
كيف	شلون
كيف حالك	شلونك
كيمونو	كمونو
ل	حتى
ل	عشان
لا	لأ
لا	ما
لا	مش
لا بد	اكيد
لا بد	لازم
لا تزال	بعده
لا توجد	ما في
لا زال	بعد
لا زال	ظل
لا زالت	بعدها
لا يعمل	خربان
لابد	لازم
لاحق	بعدين
لاحق	ثاني
لاحقاً	بعدين
لاذع	حامظ
لإحدى	لوحدة
لحضة	لحظة
لحظات	شوي
لحم	لحمة
لدى	عند
لدى	لما
لدي	إلي
لدي	عندي
لدي	معي
لديك	عندك
لديك	معك
لديكم	عندكو
لدينا	عنا
لديهم	عندهم
لذا	عشان
لذا	عشان هيك
لذلك	عشان
لذلك	فلهيك
لذلك	لهيك
لذيذ	زاكية
لذيذ	طيب
لست	مش
لص	حرامي
لطفاً	لو سمحت
لطفاء	لطيفين
لطيف	حلو
لطيف	حلوة
لطيف	مليح
لفة	شريط
لفتان	لفتين
لففتها	تلفها
لقائك	شوفتك
لك	إلك
لكن	بس
لكي	حتى
لكي	عشان
لكي	مشان
للأمام	لقدام
للتو	هسا
للغاية	كثير
لم	ما
لم	مش
لم تعد	راحت
لم يعد	بطل
لماذا	ليش
لن	ما
لنا	إلنا
لو ممكن	يا ريت
لوثوا	نزعوا
لي	إلي
ليس	ما
ليس	مش
ليس هناك	فيش
ليست	مش
ليلة	بالليل
ليلية	مسائية
ما	اللي
ما	إيش
[truncated: 642 more rows]
